# Supplementary material for: Generation of multimillion chemical space based on the parallel Groebke–Blackburn–Bienaymé reaction
Source: publisher site journal article supplement (doi:10.3762/bjoc.20.143), 2024-07-16
Supplement: Additional file 1 [file Structures of substrates 1.pdf › Structures of substrates 1.pdf]

## Structures of reactants 1

| ID   | Structure                                                                           |
|------|-------------------------------------------------------------------------------------|
| 1{1} | 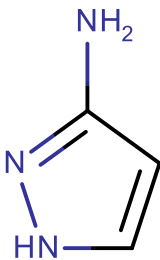   |
| 1{2} |    |
| 1{3} |  |
| 1{4} |  |

|      |                                                                                       |
|------|---------------------------------------------------------------------------------------|
| 1{5} | 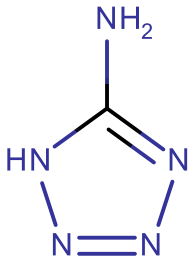   |
| 1{6} |    |
| 1{7} |  |
| 1{8} |  |

|       |                                                                                     |
|-------|-------------------------------------------------------------------------------------|
| 1{9}  | 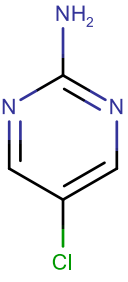   |
| 1{10} |    |
| 1{11} |  |
| 1{12} |  |

|       |                                                                                       |
|-------|---------------------------------------------------------------------------------------|
| 1{13} | 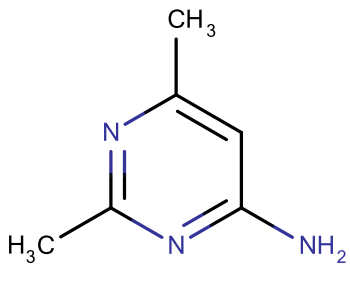   |
| 1{14} |    |
| 1{15} |  |
| 1{16} |  |

|       |                                                                                     |
|-------|-------------------------------------------------------------------------------------|
| 1{17} | 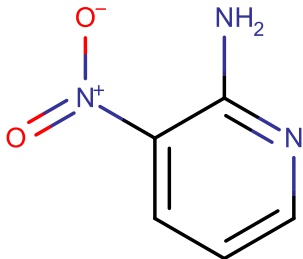   |
| 1{18} |    |
| 1{19} |  |
| 1{20} |  |

|       |                                                                                       |
|-------|---------------------------------------------------------------------------------------|
| 1{21} | 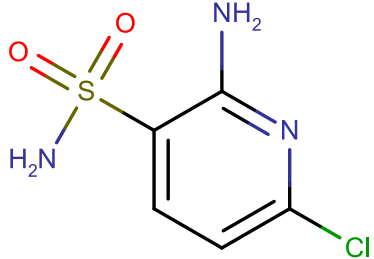   |
| 1{22} |    |
| 1{23} |  |
| 1{24} |  |

|       |                                                                                            |
|-------|--------------------------------------------------------------------------------------------|
| 1{25} | 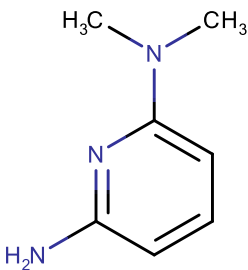          |
| 1{26} |           |
| 1{27} |         |
| 1{28} | HCl<br> |

|       |                                                                                       |
|-------|---------------------------------------------------------------------------------------|
| 1{29} | 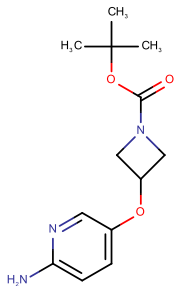   |
| 1{30} |    |
| 1{31} |  |
| 1{32} |  |

|       |                                                                                     |
|-------|-------------------------------------------------------------------------------------|
| 1{33} | 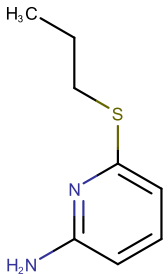   |
| 1{34} |    |
| 1{35} |  |
| 1{36} |  |

|       |                                                                                         |
|-------|-----------------------------------------------------------------------------------------|
| 1{37} | HCl 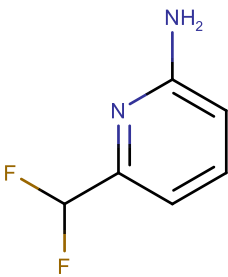 |
| 1{38} |      |
| 1{39} |    |
| 1{40} |    |

|              |                                                                                     |
|--------------|-------------------------------------------------------------------------------------|
| <b>1{41}</b> | 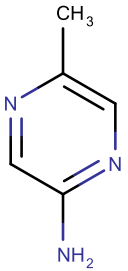   |
| <b>1{42}</b> |    |
| <b>1{43}</b> |  |
| <b>1{44}</b> |  |

|              |                                                                                                     |
|--------------|-----------------------------------------------------------------------------------------------------|
| <b>1{45}</b> | <b>HCl</b><br>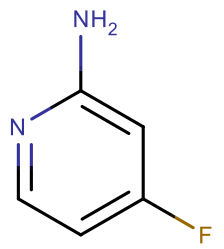   |
| <b>1{46}</b> |                  |
| <b>1{47}</b> | <b>HCl</b><br> |
| <b>1{48}</b> |                |

|       |                                                                                     |
|-------|-------------------------------------------------------------------------------------|
| 1{49} | 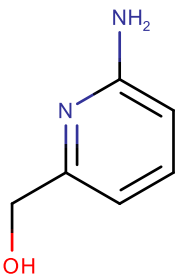   |
| 1{50} |    |
| 1{51} |  |
| 1{52} |  |

|       |                                                                                       |
|-------|---------------------------------------------------------------------------------------|
| 1{53} | 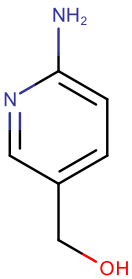   |
| 1{54} |    |
| 1{55} |  |
| 1{56} |  |



|       |  |
|-------|--|
| 1{57} |  |
| 1{58} |  |
| 1{59} |  |
| 1{60} |  |

|       |  |
|-------|--|
| 1{61} |  |
| 1{62} |  |
| 1{63} |  |
| 1{64} |  |

|       |                                                                                     |
|-------|-------------------------------------------------------------------------------------|
| 1{65} | 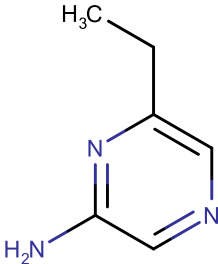   |
| 1{66} |    |
| 1{67} |  |
| 1{68} |  |

|       |                                                                                       |
|-------|---------------------------------------------------------------------------------------|
| 1{69} | 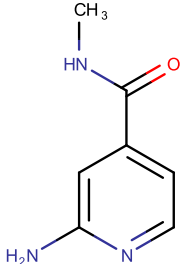   |
| 1{70} |    |
| 1{71} |  |
| 1{72} |  |

|       |                                                                                     |
|-------|-------------------------------------------------------------------------------------|
| 1{73} | 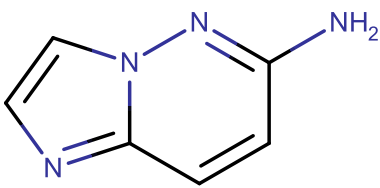   |
| 1{74} |    |
| 1{75} |   |
| 1{76} |  |

|       |                                                                                       |
|-------|---------------------------------------------------------------------------------------|
| 1{77} | 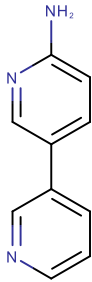   |
| 1{78} |    |
| 1{79} |  |
| 1{80} |  |

|       |                                                                                     |
|-------|-------------------------------------------------------------------------------------|
| 1{81} | 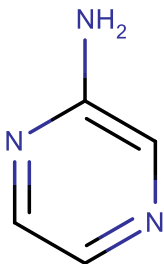   |
| 1{82} |    |
| 1{83} |   |
| 1{84} |  |

|       |                                                                                       |
|-------|---------------------------------------------------------------------------------------|
| 1{85} | 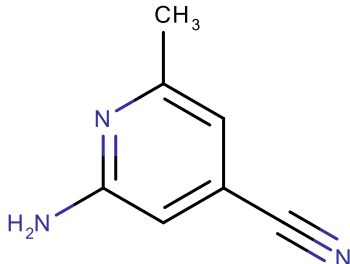   |
| 1{86} |    |
| 1{87} |   |
| 1{88} |  |

|       |                                                                                     |
|-------|-------------------------------------------------------------------------------------|
| 1{89} | 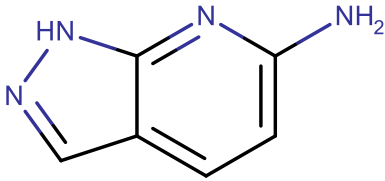   |
| 1{90} |    |
| 1{91} |  |
| 1{92} |  |

|       |                                                                                       |
|-------|---------------------------------------------------------------------------------------|
| 1{93} | 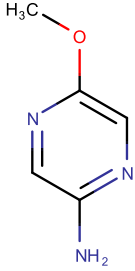   |
| 1{94} |    |
| 1{95} |  |
| 1{96} |  |

|        |                                                                                     |
|--------|-------------------------------------------------------------------------------------|
| 1{97}  | 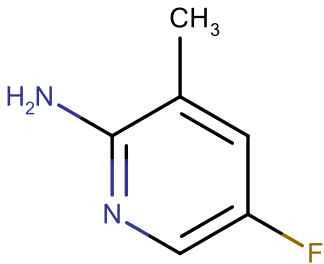   |
| 1{98}  |    |
| 1{99}  |   |
| 1{100} |  |

|        |                                                                                       |
|--------|---------------------------------------------------------------------------------------|
| 1{101} | 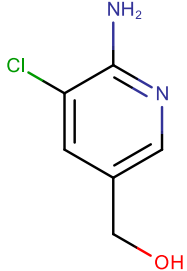   |
| 1{102} |    |
| 1{103} |   |
| 1{104} |  |

|        |                                                                                     |
|--------|-------------------------------------------------------------------------------------|
| 1{105} | 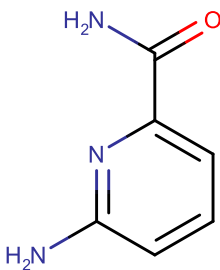   |
| 1{106} |    |
| 1{107} |  |
| 1{108} |  |

|        |                                                                                         |
|--------|-----------------------------------------------------------------------------------------|
| 1{109} | HCl 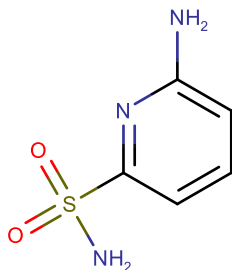 |
| 1{110} |      |
| 1{111} |    |
| 1{112} |    |

|        |                                                                                     |
|--------|-------------------------------------------------------------------------------------|
| 1{113} | 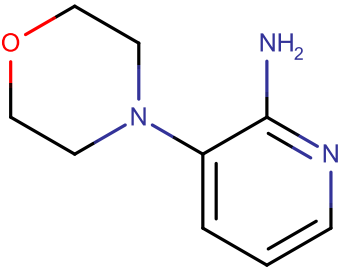   |
| 1{114} |    |
| 1{115} |   |
| 1{116} |  |

|        |                                                                                            |
|--------|--------------------------------------------------------------------------------------------|
| 1{117} | 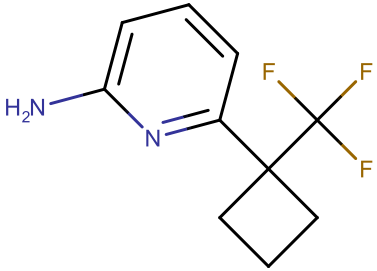        |
| 1{118} | <br>HCl |
| 1{119} |        |
| 1{120} |       |



|        |                                                                                     |
|--------|-------------------------------------------------------------------------------------|
| 1{121} | 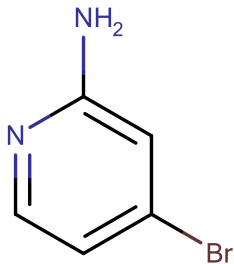   |
| 1{122} |    |
| 1{123} |  |
| 1{124} |  |

|        |                                                                                       |
|--------|---------------------------------------------------------------------------------------|
| 1{125} | 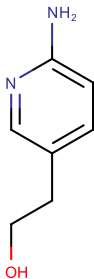   |
| 1{126} |    |
| 1{127} |  |
| 1{128} |  |

|        |                                                                                     |
|--------|-------------------------------------------------------------------------------------|
| 1{129} | 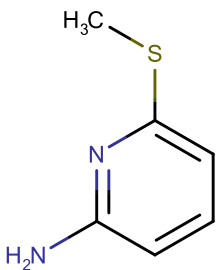   |
| 1{130} |    |
| 1{131} |   |
| 1{132} |  |

|        |                                                                                       |
|--------|---------------------------------------------------------------------------------------|
| 1{133} | 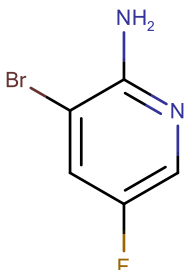   |
| 1{134} |    |
| 1{135} |   |
| 1{136} |  |

|        |                                                                                     |
|--------|-------------------------------------------------------------------------------------|
| 1{137} | 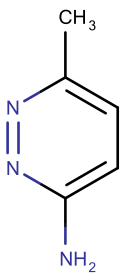   |
| 1{138} |    |
| 1{139} |   |
| 1{140} |  |

|        |                                                                                       |
|--------|---------------------------------------------------------------------------------------|
| 1{141} | 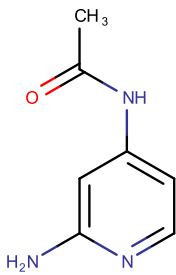   |
| 1{142} |    |
| 1{143} |   |
| 1{144} |  |

|        |                                                                                     |
|--------|-------------------------------------------------------------------------------------|
| 1{145} | 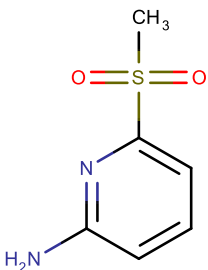   |
| 1{146} |    |
| 1{147} |  |
| 1{148} |  |

|        |                                                                                       |
|--------|---------------------------------------------------------------------------------------|
| 1{149} | 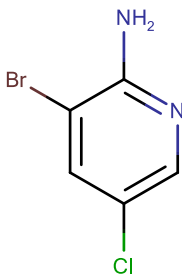   |
| 1{150} |    |
| 1{151} |  |
| 1{152} |  |

|        |                                                                                     |
|--------|-------------------------------------------------------------------------------------|
| 1{153} | 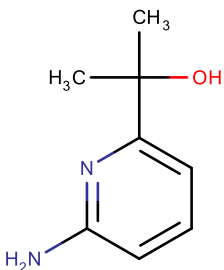   |
| 1{154} |    |
| 1{155} |  |
| 1{156} |  |

|        |                                                                                       |
|--------|---------------------------------------------------------------------------------------|
| 1{157} | 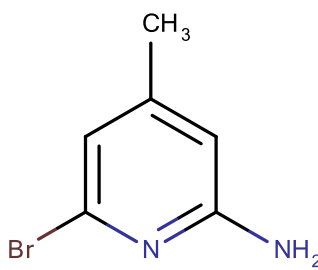   |
| 1{158} |    |
| 1{159} |  |
| 1{160} |  |

|        |                                                                                     |
|--------|-------------------------------------------------------------------------------------|
| 1{161} | 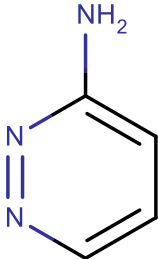   |
| 1{162} |    |
| 1{163} |  |
| 1{164} |  |

|        |                                                                                       |
|--------|---------------------------------------------------------------------------------------|
| 1{165} | 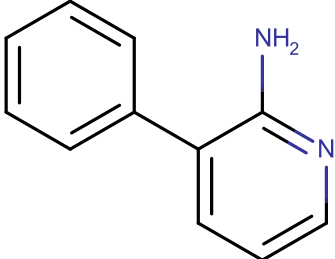   |
| 1{166} |    |
| 1{167} |  |
| 1{168} |  |

|        |                                                                                                                          |
|--------|--------------------------------------------------------------------------------------------------------------------------|
| 1{169} | 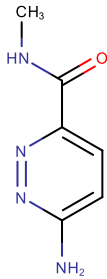<br><chem>CC(=O)Nc1ccc(N)nn1</chem>     |
| 1{170} | <br><chem>CC1=CC=C(N)C(Br)=N1</chem>    |
| 1{171} | <br><chem>Nc1ccc(cc1)n2cc[nH]2</chem> |
| 1{172} | <br><chem>Nc1ccc2c(c1)occc2</chem>    |

|        |                                                                                                                               |
|--------|-------------------------------------------------------------------------------------------------------------------------------|
| 1{173} | 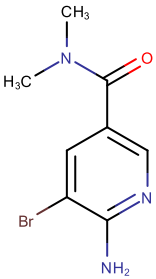<br><chem>CC(=O)Nc1cc(Br)ccc1N</chem>      |
| 1{174} | <br><chem>N#Cc1ccccc1N</chem>              |
| 1{175} | <br><chem>Nc1ccccc1OCCF</chem>           |
| 1{176} | <br><chem>Nc1nc(N)nc2ccn12N3CCCC3</chem> |

|        |                                                                                     |
|--------|-------------------------------------------------------------------------------------|
| 1{177} | 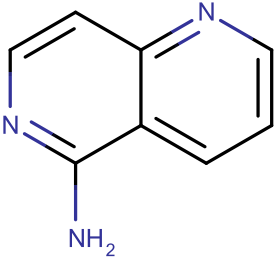   |
| 1{178} |    |
| 1{179} |  |
| 1{180} |  |

|        |                                                                                       |
|--------|---------------------------------------------------------------------------------------|
| 1{181} | 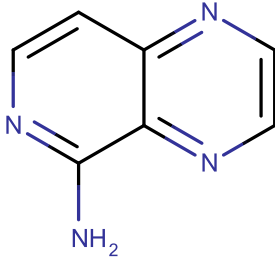   |
| 1{182} |    |
| 1{183} |  |
| 1{184} |  |



|        |  |
|--------|--|
| 1{185} |  |
| 1{186} |  |
| 1{187} |  |
| 1{188} |  |

|        |  |
|--------|--|
| 1{189} |  |
| 1{190} |  |
| 1{191} |  |
| 1{192} |  |

|        |  |
|--------|--|
| 1{193} |  |
| 1{194} |  |
| 1{195} |  |
| 1{196} |  |

|        |         |
|--------|---------|
| 1{197} |         |
| 1{198} |         |
| 1{199} |         |
| 1{200} | HCl<br> |

|        |                                                                                     |
|--------|-------------------------------------------------------------------------------------|
| 1{201} | 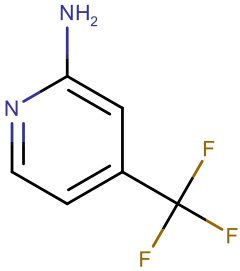   |
| 1{202} |    |
| 1{203} |  |
| 1{204} |  |

|        |                                                                                       |
|--------|---------------------------------------------------------------------------------------|
| 1{205} | 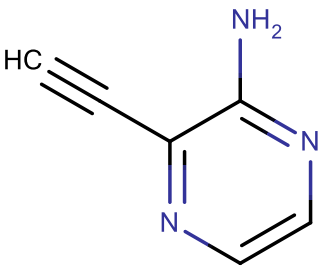   |
| 1{206} |    |
| 1{207} |   |
| 1{208} |  |

|        |                                                                                     |
|--------|-------------------------------------------------------------------------------------|
| 1{209} | 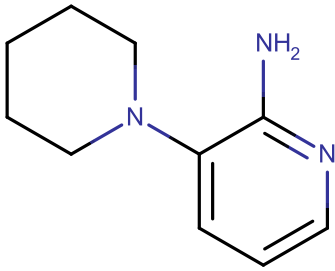   |
| 1{210} |    |
| 1{211} |   |
| 1{212} |  |

|        |                                                                                       |
|--------|---------------------------------------------------------------------------------------|
| 1{213} | 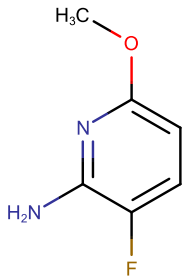   |
| 1{214} |    |
| 1{215} |  |
| 1{216} |  |

|        |                                                                                         |
|--------|-----------------------------------------------------------------------------------------|
| 1{217} | 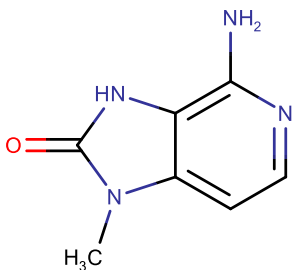       |
| 1{218} |        |
| 1{219} |      |
| 1{220} | HCl  |

|        |                                                                                         |
|--------|-----------------------------------------------------------------------------------------|
| 1{221} | 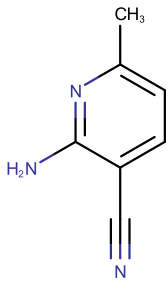     |
| 1{222} | HCl  |
| 1{223} |    |
| 1{224} |    |

|        |                                                                                     |
|--------|-------------------------------------------------------------------------------------|
| 1{225} | 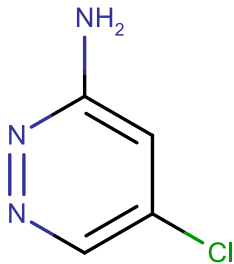   |
| 1{226} |    |
| 1{227} |   |
| 1{228} |  |

|        |                                                                                       |
|--------|---------------------------------------------------------------------------------------|
| 1{229} | 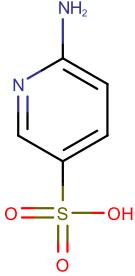   |
| 1{230} |    |
| 1{231} |   |
| 1{232} |  |

|        |                                                                                     |
|--------|-------------------------------------------------------------------------------------|
| 1{233} | 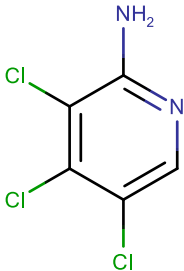   |
| 1{234} |    |
| 1{235} |   |
| 1{236} |  |

|        |                                                                                       |
|--------|---------------------------------------------------------------------------------------|
| 1{237} | 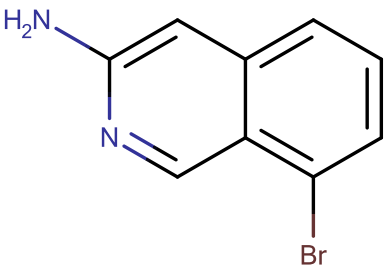   |
| 1{238} |    |
| 1{239} |   |
| 1{240} |  |

|        |                                                                                     |
|--------|-------------------------------------------------------------------------------------|
| 1{241} | 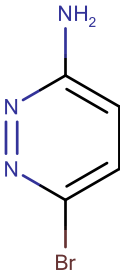   |
| 1{242} |    |
| 1{243} |   |
| 1{244} |  |

|        |                                                                                         |
|--------|-----------------------------------------------------------------------------------------|
| 1{245} | HCl 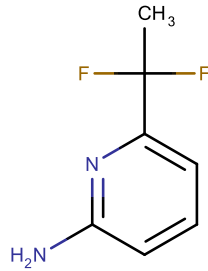 |
| 1{246} |      |
| 1{247} |     |
| 1{248} |    |



|        |                                                                                     |
|--------|-------------------------------------------------------------------------------------|
| 1{249} | 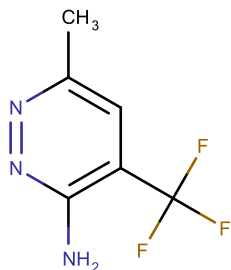   |
| 1{250} |    |
| 1{251} |  |
| 1{252} |  |

|        |                                                                                       |
|--------|---------------------------------------------------------------------------------------|
| 1{253} | 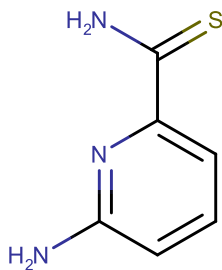   |
| 1{254} |    |
| 1{255} |  |
| 1{256} |  |

|        |                                                                                     |
|--------|-------------------------------------------------------------------------------------|
| 1{257} | 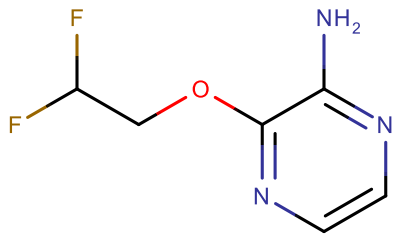   |
| 1{258} |    |
| 1{259} |  |
| 1{260} |  |

|        |                                                                                       |
|--------|---------------------------------------------------------------------------------------|
| 1{261} | 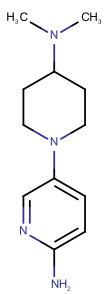   |
| 1{262} |    |
| 1{263} |  |
| 1{264} |  |

|        |                                                                                     |
|--------|-------------------------------------------------------------------------------------|
| 1{265} | 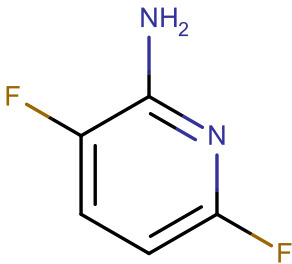   |
| 1{266} |    |
| 1{267} |  |
| 1{268} |  |

|        |                                                                                       |
|--------|---------------------------------------------------------------------------------------|
| 1{269} | 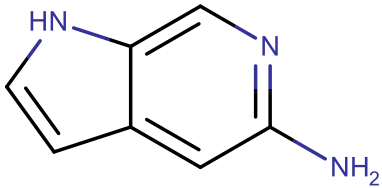   |
| 1{270} |    |
| 1{271} |   |
| 1{272} |  |

|        |                                                                                     |
|--------|-------------------------------------------------------------------------------------|
| 1{273} | 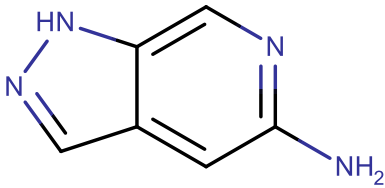   |
| 1{274} |    |
| 1{275} |  |
| 1{276} |  |

|        |                                                                                       |
|--------|---------------------------------------------------------------------------------------|
| 1{277} | 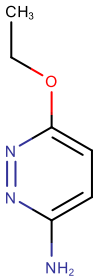   |
| 1{278} |    |
| 1{279} |  |
| 1{280} |  |

|        |                                                                                     |
|--------|-------------------------------------------------------------------------------------|
| 1{281} | 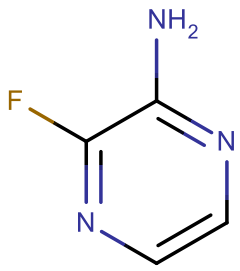   |
| 1{282} |    |
| 1{283} |  |
| 1{284} |  |

|        |                                                                                       |
|--------|---------------------------------------------------------------------------------------|
| 1{285} | 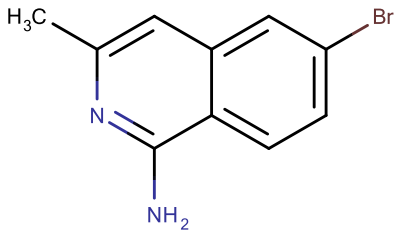   |
| 1{286} |    |
| 1{287} |  |
| 1{288} |  |

|        |                                                                                                       |
|--------|-------------------------------------------------------------------------------------------------------|
| 1{289} | <chem>HCl</chem><br>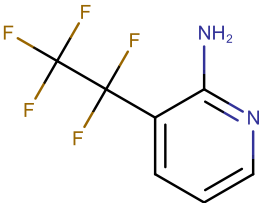 |
| 1{290} |                      |
| 1{291} |                     |
| 1{292} |                    |

|        |                                                                                       |
|--------|---------------------------------------------------------------------------------------|
| 1{293} | 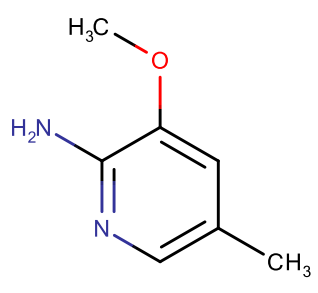   |
| 1{294} |    |
| 1{295} |   |
| 1{296} |  |

|        |                                                                                                                                |
|--------|--------------------------------------------------------------------------------------------------------------------------------|
| 1{297} | 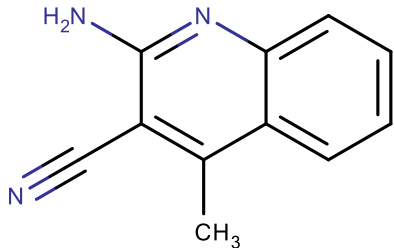<br><chem>Cc1c(C#N)c(N)c2ccccc12</chem>       |
| 1{298} | <br><chem>Clc1nc2ccccc2n(C)1</chem>           |
| 1{299} | <br><chem>COc1ccc([N+](=O)[O-])c(N)c1</chem> |
| 1{300} | <br><chem>Clc1c(N)c2ccccc2n1</chem>         |

|        |                                                                                                                          |
|--------|--------------------------------------------------------------------------------------------------------------------------|
| 1{301} | 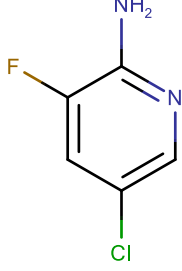<br><chem>Fc1cc(Cl)cc(N)n1</chem>     |
| 1{302} | <br><chem>N#Cc1cc(N)ncn1</chem>       |
| 1{303} | <br><chem>Nc1c2ccccc2nc1</chem>     |
| 1{304} | <br><chem>N#Cc1cc(Br)cc(N)n1</chem> |

|        |                                                                                     |
|--------|-------------------------------------------------------------------------------------|
| 1{305} | 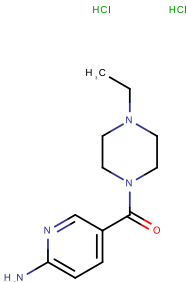   |
| 1{306} |    |
| 1{307} |  |
| 1{308} |  |

|        |                                                                                       |
|--------|---------------------------------------------------------------------------------------|
| 1{309} | 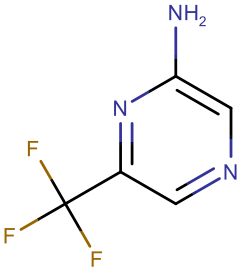   |
| 1{310} |    |
| 1{311} |  |
| 1{312} |  |



|        |                                                                                                     |
|--------|-----------------------------------------------------------------------------------------------------|
| 1{313} | 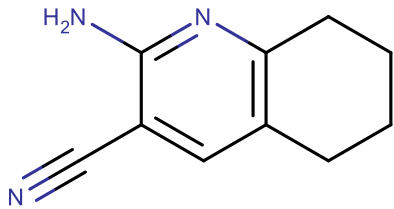                   |
| 1{314} |                    |
| 1{315} |                  |
| 1{316} | <br>HCl      HCl |

|        |                                                                                       |
|--------|---------------------------------------------------------------------------------------|
| 1{317} | 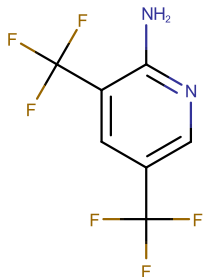   |
| 1{318} |    |
| 1{319} |  |
| 1{320} |  |

|        |                                                                                            |
|--------|--------------------------------------------------------------------------------------------|
| 1{321} | 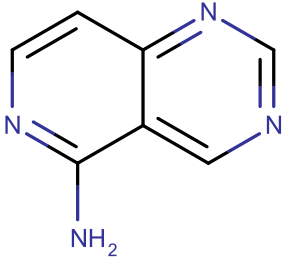          |
| 1{322} |           |
| 1{323} |         |
| 1{324} | <br>HCl |

|        |                                                                                       |
|--------|---------------------------------------------------------------------------------------|
| 1{325} | 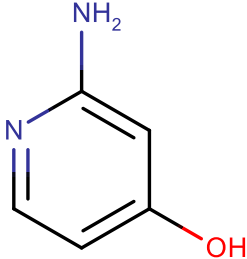   |
| 1{326} |    |
| 1{327} |  |
| 1{328} |  |

|        |                                                                                                                                                            |
|--------|------------------------------------------------------------------------------------------------------------------------------------------------------------|
| 1{329} | <chem>HCl</chem> 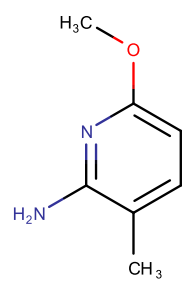 <chem>COc1cc(C)c(N)cn1</chem>                           |
| 1{330} |  <chem>CN(C)S(=O)(=O)c1cc(N)ncn1</chem>                                   |
| 1{331} | <chem>HCl</chem> <chem>HCl</chem>  <chem>CN(C)CCN(C)Cc1cc(N)ncn1</chem> |
| 1{332} |  <chem>NC1=CC=CC=C1CN2=CC=CC=N2</chem>                                  |

|        |                                                                                                                                     |
|--------|-------------------------------------------------------------------------------------------------------------------------------------|
| 1{333} | 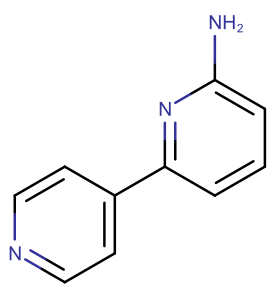 <chem>c1ccncc1-c2ccncc2</chem>                  |
| 1{334} |  <chem>Nc1nc2c(cnc2C#N)C3=CC=CC=C3O3</chem>      |
| 1{335} |  <chem>Nc1nc2c(c[nH]2)C3=CC=CC=C3Br1</chem>    |
| 1{336} |  <chem>Nc1nc2cc(Cl)c([N+](=O)[O-])cc2n1</chem> |

|        |                                                                                     |
|--------|-------------------------------------------------------------------------------------|
| 1{337} | 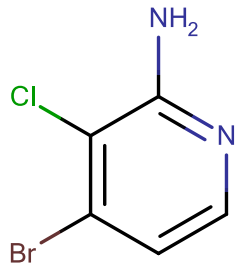   |
| 1{338} |    |
| 1{339} |  |
| 1{340} |  |

|        |                                                                                       |
|--------|---------------------------------------------------------------------------------------|
| 1{341} | 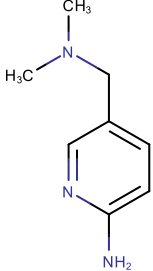   |
| 1{342} |    |
| 1{343} |  |
| 1{344} |  |

|        |                                                                                     |
|--------|-------------------------------------------------------------------------------------|
| 1{345} | 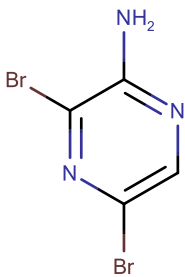   |
| 1{346} |    |
| 1{347} |  |
| 1{348} |  |

|        |                                                                                       |
|--------|---------------------------------------------------------------------------------------|
| 1{349} | 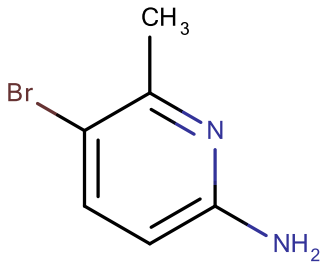   |
| 1{350} |    |
| 1{351} |  |
| 1{352} |  |

|        |                                                                                     |
|--------|-------------------------------------------------------------------------------------|
| 1{353} | 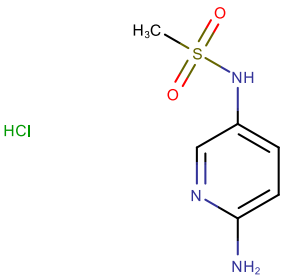   |
| 1{354} |    |
| 1{355} |  |
| 1{356} |  |

|        |                                                                                       |
|--------|---------------------------------------------------------------------------------------|
| 1{357} | 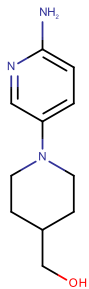   |
| 1{358} |    |
| 1{359} |   |
| 1{360} |  |

|        |                                                                                     |
|--------|-------------------------------------------------------------------------------------|
| 1{361} | 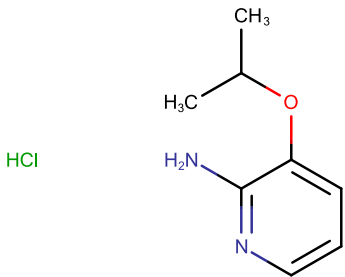   |
| 1{362} |    |
| 1{363} |  |
| 1{364} |  |

|        |                                                                                       |
|--------|---------------------------------------------------------------------------------------|
| 1{365} | 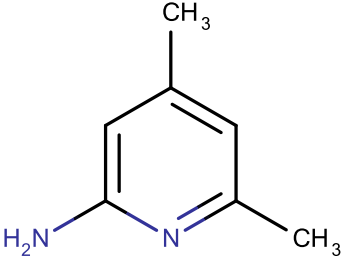   |
| 1{366} |    |
| 1{367} |  |
| 1{368} |  |

|        |                                                                                     |
|--------|-------------------------------------------------------------------------------------|
| 1{369} | 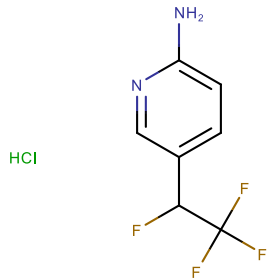   |
| 1{370} |    |
| 1{371} |  |
| 1{372} |  |

|        |                                                                                       |
|--------|---------------------------------------------------------------------------------------|
| 1{373} | 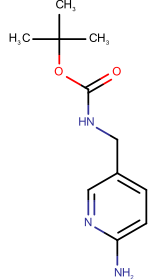   |
| 1{374} |    |
| 1{375} |  |
| 1{376} |  |



|        |                                                                                     |
|--------|-------------------------------------------------------------------------------------|
| 1{377} | 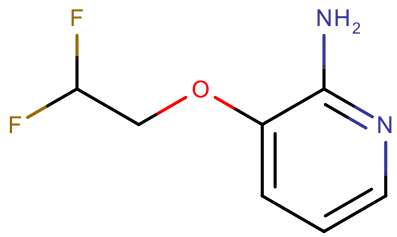   |
| 1{378} |    |
| 1{379} |  |
| 1{380} |  |

|        |                                                                                       |
|--------|---------------------------------------------------------------------------------------|
| 1{381} | 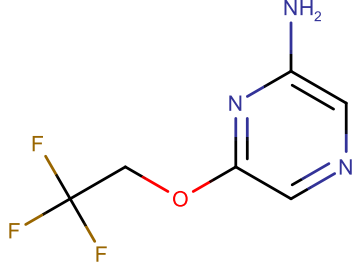   |
| 1{382} |    |
| 1{383} |   |
| 1{384} |  |

|        |                                                                                     |
|--------|-------------------------------------------------------------------------------------|
| 1{385} | 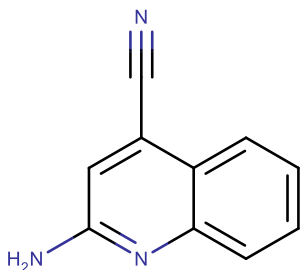   |
| 1{386} |    |
| 1{387} |  |
| 1{388} |  |

|        |                                                                                       |
|--------|---------------------------------------------------------------------------------------|
| 1{389} | 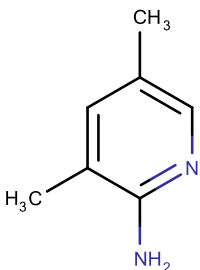   |
| 1{390} |    |
| 1{391} |  |
| 1{392} |  |

|        |                                                                                     |
|--------|-------------------------------------------------------------------------------------|
| 1{393} | 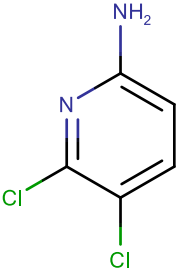   |
| 1{394} |    |
| 1{395} |   |
| 1{396} |  |

|        |                                                                                         |
|--------|-----------------------------------------------------------------------------------------|
| 1{397} | HCl 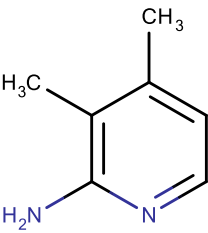 |
| 1{398} | HCl  |
| 1{399} |     |
| 1{400} |    |

|        |                                                                                     |
|--------|-------------------------------------------------------------------------------------|
| 1{401} | 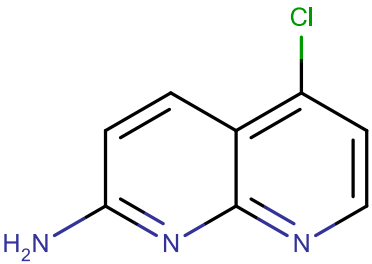   |
| 1{402} |    |
| 1{403} |   |
| 1{404} |  |

|        |                                                                                       |
|--------|---------------------------------------------------------------------------------------|
| 1{405} | 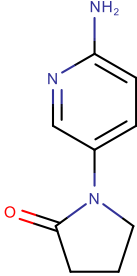   |
| 1{406} |    |
| 1{407} |   |
| 1{408} |  |

|        |                                                                                     |
|--------|-------------------------------------------------------------------------------------|
| 1{409} | 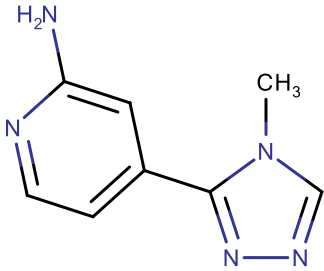   |
| 1{410} |    |
| 1{411} |  |
| 1{412} |  |

|        |                                                                                              |
|--------|----------------------------------------------------------------------------------------------|
| 1{413} | 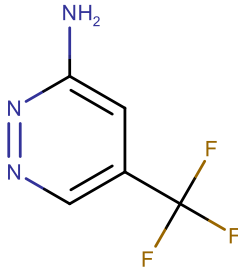          |
| 1{414} |           |
| 1{415} | <br>HCl |
| 1{416} | <br>HCl |

|        |                                                                                                         |
|--------|---------------------------------------------------------------------------------------------------------|
| 1{417} | <p>HCl</p> 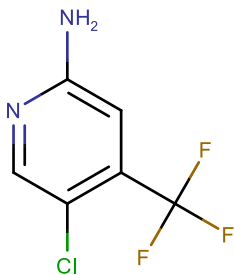            |
| 1{418} | <p>HBr</p>             |
| 1{419} |                       |
| 1{420} | <p>HCl      HCl</p>  |

|        |                                                                                                 |
|--------|-------------------------------------------------------------------------------------------------|
| 1{421} | 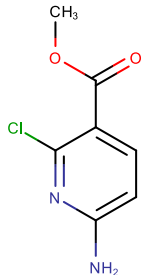             |
| 1{422} |              |
| 1{423} | <p>HCl</p>  |
| 1{424} |            |

|        |                                                                                                                             |
|--------|-----------------------------------------------------------------------------------------------------------------------------|
| 1{425} | 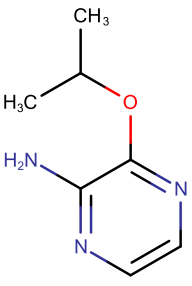<br><chem>COC1=CC=C(N)C=C1c2ncncn2</chem>  |
| 1{426} | <br><chem>Nc1cc(C2=NN=CN2)ncn1</chem>      |
| 1{427} | <br><chem>COC1=CC2=C(N)N=CC=C2C=C1</chem> |
| 1{428} | <br><chem>Nc1cc(Br)ncn1</chem>           |

|        |                                                                                                                                        |
|--------|----------------------------------------------------------------------------------------------------------------------------------------|
| 1{429} | HBr 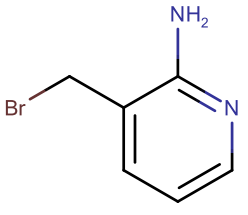<br><chem>Nc1cc(BrCC)ncn1</chem>                |
| 1{430} | <br><chem>Nc1ccc2c(c1)nc(=O)[nH]c2S(=O)(=O)N</chem> |
| 1{431} | <br><chem>Nc1cc(F)ncn1</chem>                      |
| 1{432} | <br><chem>Cc1c(I)nc(N)cn1</chem>                  |

|        |  |
|--------|--|
| 1{433} |  |
| 1{434} |  |
| 1{435} |  |
| 1{436} |  |

|        |  |
|--------|--|
| 1{437} |  |
| 1{438} |  |
| 1{439} |  |
| 1{440} |  |



|        |                                                                                     |
|--------|-------------------------------------------------------------------------------------|
| 1{441} | 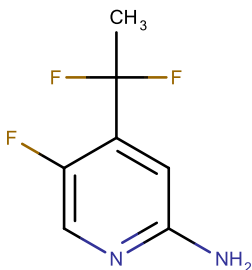   |
| 1{442} |    |
| 1{443} |   |
| 1{444} |  |

|        |                                                                                       |
|--------|---------------------------------------------------------------------------------------|
| 1{445} | 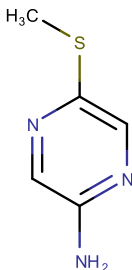   |
| 1{446} |    |
| 1{447} |   |
| 1{448} |  |

|        |                                                                                     |
|--------|-------------------------------------------------------------------------------------|
| 1{449} | 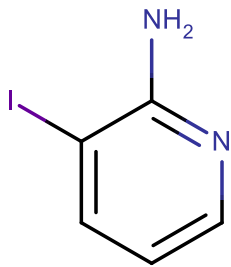   |
| 1{450} |    |
| 1{451} |  |
| 1{452} |  |

|        |                                                                                       |
|--------|---------------------------------------------------------------------------------------|
| 1{453} | 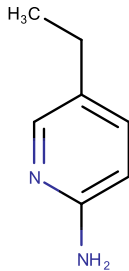   |
| 1{454} |    |
| 1{455} |  |
| 1{456} |  |

|        |                                                                                     |
|--------|-------------------------------------------------------------------------------------|
| 1{457} | 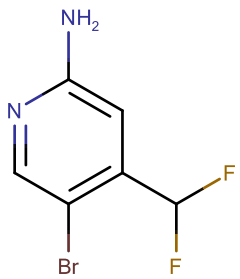   |
| 1{458} |    |
| 1{459} |   |
| 1{460} |  |

|        |                                                                                       |
|--------|---------------------------------------------------------------------------------------|
| 1{461} | 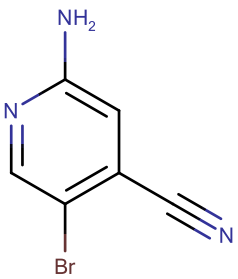   |
| 1{462} |    |
| 1{463} |   |
| 1{464} |  |

|        |  |
|--------|--|
| 1{465} |  |
| 1{466} |  |
| 1{467} |  |
| 1{468} |  |

|        |  |
|--------|--|
| 1{469} |  |
| 1{470} |  |
| 1{471} |  |
| 1{472} |  |

|        |                                                                                     |
|--------|-------------------------------------------------------------------------------------|
| 1{473} | 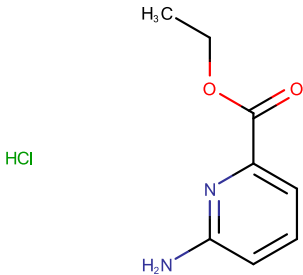   |
| 1{474} |    |
| 1{475} |  |
| 1{476} |  |

|        |                                                                                       |
|--------|---------------------------------------------------------------------------------------|
| 1{477} | 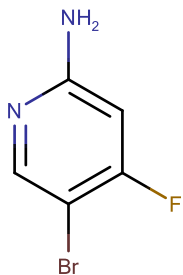   |
| 1{478} |    |
| 1{479} |  |
| 1{480} |  |

|        |                                                                                                                              |
|--------|------------------------------------------------------------------------------------------------------------------------------|
| 1{481} | 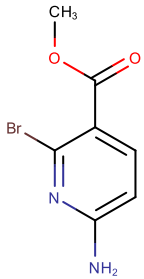                                            |
| 1{482} |                                             |
| 1{483} |                                           |
| 1{484} | <p data-bbox="379 1527 411 1550">HBr</p>  |

|        |                                                                                     |
|--------|-------------------------------------------------------------------------------------|
| 1{485} | 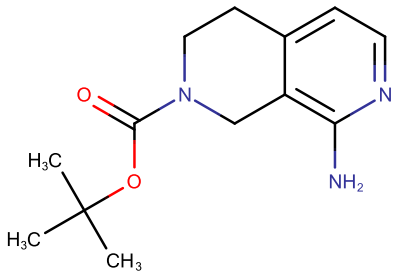 |
|--------|-------------------------------------------------------------------------------------|
