# Supplementary material for: Generation of multimillion chemical space based on the parallel Groebke–Blackburn–Bienaymé reaction
Source: publisher site journal article supplement (doi:10.3762/bjoc.20.143), 2024-07-16
Supplement: Additional file 1 [file Structures of substrates 2.pdf › Structures of substrates 2.pdf]

## Structures of reactants 2

| ID       | Structure                                                                           |
|----------|-------------------------------------------------------------------------------------|
| $2\{1\}$ | 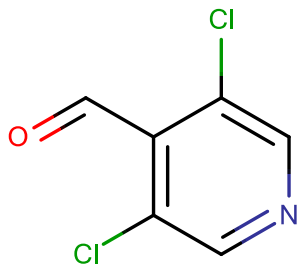   |
| $2\{2\}$ |    |
| $2\{3\}$ |  |
| $2\{4\}$ |  |

|          |                                                                                       |
|----------|---------------------------------------------------------------------------------------|
| $2\{5\}$ | 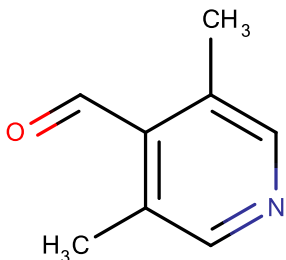   |
| $2\{6\}$ |    |
| $2\{7\}$ |   |
| $2\{8\}$ |  |

|           |                                                                                     |
|-----------|-------------------------------------------------------------------------------------|
| $2\{9\}$  | 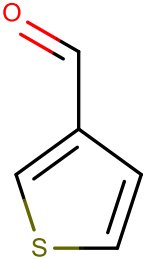   |
| $2\{10\}$ |    |
| $2\{11\}$ |  |
| $2\{12\}$ |  |

|           |                                                                                       |
|-----------|---------------------------------------------------------------------------------------|
| $2\{13\}$ | 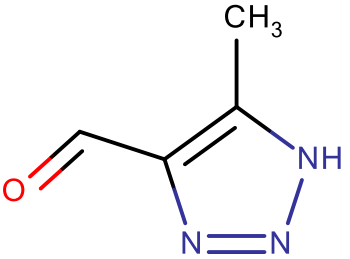   |
| $2\{14\}$ |    |
| $2\{15\}$ |  |
| $2\{16\}$ |  |

|              |                                                                                     |
|--------------|-------------------------------------------------------------------------------------|
| <b>2{17}</b> | 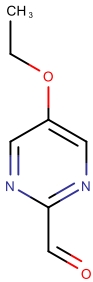   |
| <b>2{18}</b> |    |
| <b>2{19}</b> |   |
| <b>2{20}</b> |  |

|              |                                                                                       |
|--------------|---------------------------------------------------------------------------------------|
| <b>2{21}</b> | 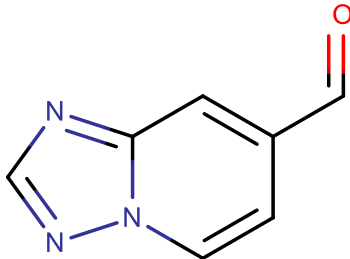   |
| <b>2{22}</b> |    |
| <b>2{23}</b> |   |
| <b>2{24}</b> |  |

|              |                                                                                     |
|--------------|-------------------------------------------------------------------------------------|
| <b>2{25}</b> | 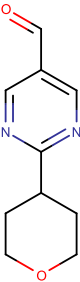   |
| <b>2{26}</b> |    |
| <b>2{27}</b> |  |
| <b>2{28}</b> |  |

|              |                                                                                       |
|--------------|---------------------------------------------------------------------------------------|
| <b>2{29}</b> | 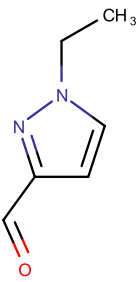   |
| <b>2{30}</b> |    |
| <b>2{31}</b> |  |
| <b>2{32}</b> |  |

|       |                                                                                                                             |
|-------|-----------------------------------------------------------------------------------------------------------------------------|
| 2{33} | 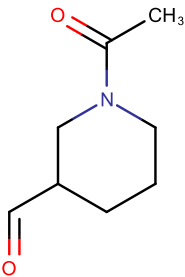 <chem>CC(=O)N1CCCCC1C=O</chem>            |
| 2{34} |  <chem>CP(=O)(C)c1ccc(C=O)cc1</chem>       |
| 2{35} |  <chem>CC1=C(Cl)C(=CN1C)C=O</chem>       |
| 2{36} |  <chem>CC1=CC(=CC=C1N)C=OCOCC(F)F</chem> |

|       |                                                                                                                      |
|-------|----------------------------------------------------------------------------------------------------------------------|
| 2{37} | 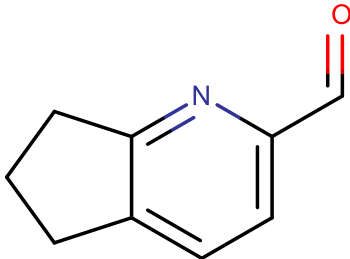 <chem>O=Cc1ccc2c(c1)CCCC2</chem> |
| 2{38} |  <chem>O=Cc1ccc(C#CC)cn1</chem>   |
| 2{39} |  <chem>O=Cc1ccoc1</chem>        |
| 2{40} |  <chem>O=Cc1sc(CO)cn1</chem>    |

|              |                                                                                     |
|--------------|-------------------------------------------------------------------------------------|
| <b>2{41}</b> | 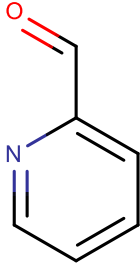   |
| <b>2{42}</b> |    |
| <b>2{43}</b> |   |
| <b>2{44}</b> |  |

|              |                                                                                       |
|--------------|---------------------------------------------------------------------------------------|
| <b>2{45}</b> | 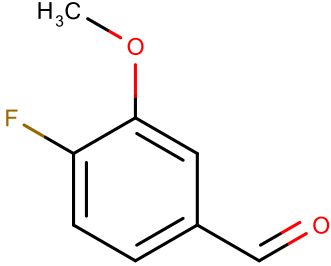   |
| <b>2{46}</b> |    |
| <b>2{47}</b> |  |
| <b>2{48}</b> |  |

|           |                                                                                     |
|-----------|-------------------------------------------------------------------------------------|
| $2\{49\}$ | 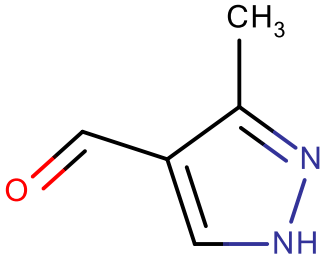   |
| $2\{50\}$ |    |
| $2\{51\}$ |   |
| $2\{52\}$ |  |

|           |                                                                                       |
|-----------|---------------------------------------------------------------------------------------|
| $2\{53\}$ | 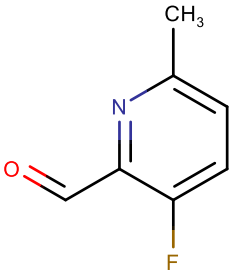   |
| $2\{54\}$ |    |
| $2\{55\}$ |  |
| $2\{56\}$ |  |



|           |                                                                                     |
|-----------|-------------------------------------------------------------------------------------|
| $2\{57\}$ | 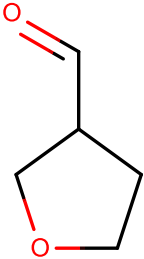   |
| $2\{58\}$ |    |
| $2\{59\}$ |   |
| $2\{60\}$ |  |

|           |                                                                                       |
|-----------|---------------------------------------------------------------------------------------|
| $2\{61\}$ | 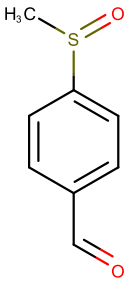   |
| $2\{62\}$ |    |
| $2\{63\}$ |  |
| $2\{64\}$ |  |

|       |                                                                                                                             |
|-------|-----------------------------------------------------------------------------------------------------------------------------|
| 2{65} | 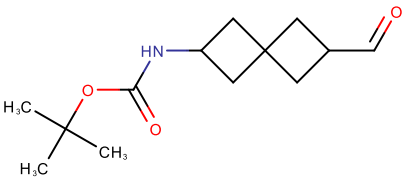 <chem>CC(C)(OC(=O)NCC1CCC1CC=O)C=O</chem> |
| 2{66} |  <chem>CCN1C(=O)C(C)=CN1C</chem>           |
| 2{67} |  <chem>CCCCC1CCCC1CC=O</chem>            |
| 2{68} |  <chem>CC(O)C1=CN=C(S1)C=O</chem>        |

|       |                                                                                                                           |
|-------|---------------------------------------------------------------------------------------------------------------------------|
| 2{69} | 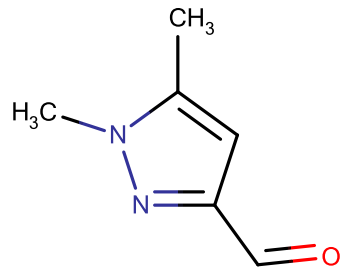 <chem>CC1=CC(=CN1)CC=O</chem>         |
| 2{70} |  <chem>CC(F)(F)C1=CN=C(S1)C=O</chem>   |
| 2{71} |  <chem>CC1=CN(C1)[C@H]2OCC2C=O</chem> |
| 2{72} |  <chem>CC(C)C(=O)NCC=O</chem>        |

|              |                                                                                     |
|--------------|-------------------------------------------------------------------------------------|
| <b>2{73}</b> | 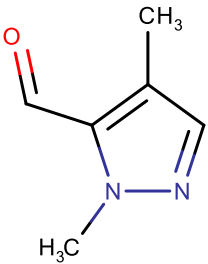   |
| <b>2{74}</b> |    |
| <b>2{75}</b> |   |
| <b>2{76}</b> |  |

|              |                                                                                       |
|--------------|---------------------------------------------------------------------------------------|
| <b>2{77}</b> | 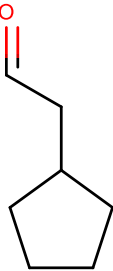   |
| <b>2{78}</b> |    |
| <b>2{79}</b> |  |
| <b>2{80}</b> |  |

|       |                                                                                     |
|-------|-------------------------------------------------------------------------------------|
| 2{81} | 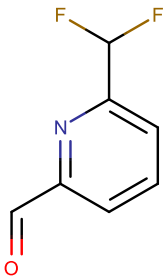   |
| 2{82} |    |
| 2{83} |  |
| 2{84} |  |

|       |                                                                                       |
|-------|---------------------------------------------------------------------------------------|
| 2{85} | 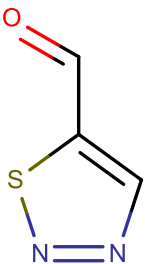   |
| 2{86} |    |
| 2{87} |   |
| 2{88} |  |

|       |                                                                                                                                 |
|-------|---------------------------------------------------------------------------------------------------------------------------------|
| 2{89} | 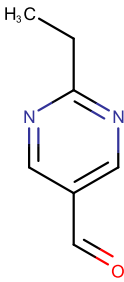 <chem>CNc1cc(C=O)ncn1</chem>                  |
| 2{90} |  <chem>Cc1cc(C=O)nn1C=O</chem>                 |
| 2{91} |  <chem>C1=CC=C2C(=C1)OC2c3cc(C=O)ncn3</chem> |
| 2{92} |  <chem>Cc1cc(C=O)nn1C=O</chem>               |

|       |                                                                                                                       |
|-------|-----------------------------------------------------------------------------------------------------------------------|
| 2{93} | 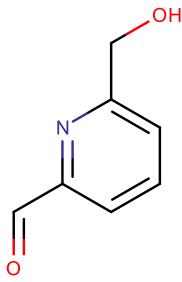 <chem>OCc1cc(C=O)ncn1</chem>      |
| 2{94} |  <chem>O=C1C=CC(=O)NCC1=O</chem>   |
| 2{95} |  <chem>CN(C)c1cc(C=O)ncn1</chem> |
| 2{96} |  <chem>O=C1C=CC(=O)NCC1=O</chem> |

|            |                                                                                     |
|------------|-------------------------------------------------------------------------------------|
| $2\{97\}$  | 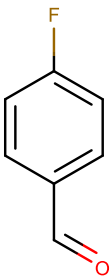   |
| $2\{98\}$  |    |
| $2\{99\}$  |  |
| $2\{100\}$ |  |

|            |                                                                                       |
|------------|---------------------------------------------------------------------------------------|
| $2\{101\}$ | 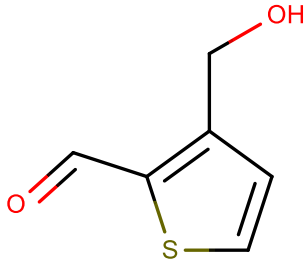   |
| $2\{102\}$ |    |
| $2\{103\}$ |  |
| $2\{104\}$ |  |

|            |                                                                                     |
|------------|-------------------------------------------------------------------------------------|
| $2\{105\}$ | 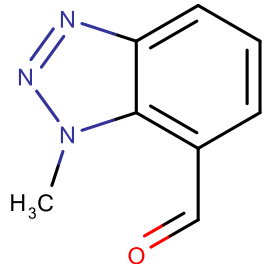   |
| $2\{106\}$ |    |
| $2\{107\}$ |  |
| $2\{108\}$ |  |

|            |                                                                                       |
|------------|---------------------------------------------------------------------------------------|
| $2\{109\}$ | 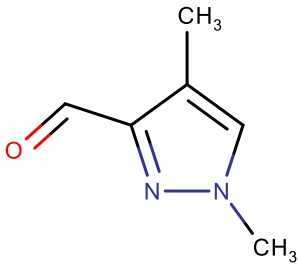   |
| $2\{110\}$ |    |
| $2\{111\}$ |  |
| $2\{112\}$ |  |

|            |                                                                                     |
|------------|-------------------------------------------------------------------------------------|
| $2\{113\}$ | 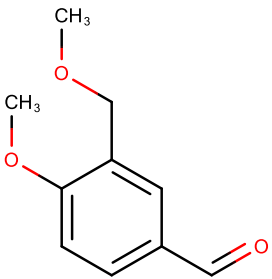   |
| $2\{114\}$ |    |
| $2\{115\}$ |  |
| $2\{116\}$ |  |

|            |                                                                                       |
|------------|---------------------------------------------------------------------------------------|
| $2\{117\}$ | 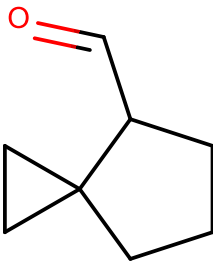   |
| $2\{118\}$ |    |
| $2\{119\}$ |  |
| $2\{120\}$ |  |



|            |  |
|------------|--|
| $2\{121\}$ |  |
| $2\{122\}$ |  |
| $2\{123\}$ |  |
| $2\{124\}$ |  |

|            |  |
|------------|--|
| $2\{125\}$ |  |
| $2\{126\}$ |  |
| $2\{127\}$ |  |
| $2\{128\}$ |  |

|            |                                                                                                                            |
|------------|----------------------------------------------------------------------------------------------------------------------------|
| $2\{129\}$ | 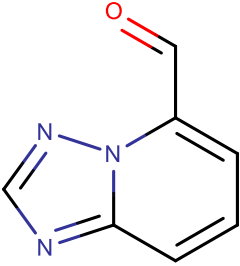<br><chem>O=Cc1ccc2nc3cc[nH]3n2c1</chem>  |
| $2\{130\}$ | <br><chem>COc1cc(C=O)ccn1</chem>          |
| $2\{131\}$ | <br><chem>O=Cc1nn(C2CC2)c[nH]1</chem>   |
| $2\{132\}$ | <br><chem>COc1cc(Br)c(F)c(C=O)c1</chem> |

|            |                                                                                                                                |
|------------|--------------------------------------------------------------------------------------------------------------------------------|
| $2\{133\}$ | 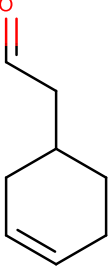<br><chem>O=CC1CCCCC1</chem>                |
| $2\{134\}$ | <br><chem>COc1cc(C=O)ncn1</chem>            |
| $2\{135\}$ | <br><chem>CC1=C(C)C(C=O)=CN(C)N1</chem>   |
| $2\{136\}$ | <br><chem>COc1cc(C=O)c(C)c(Br)c1OC</chem> |

|        |                                                                                     |
|--------|-------------------------------------------------------------------------------------|
| 2{137} | 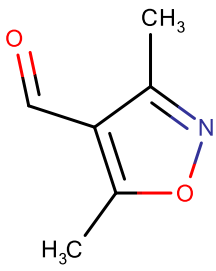   |
| 2{138} |    |
| 2{139} |   |
| 2{140} |  |

|        |                                                                                       |
|--------|---------------------------------------------------------------------------------------|
| 2{141} | 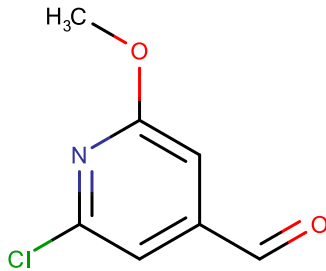   |
| 2{142} |    |
| 2{143} |   |
| 2{144} |  |

|               |                                                                                     |
|---------------|-------------------------------------------------------------------------------------|
| <b>2{145}</b> | 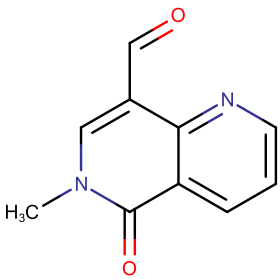   |
| <b>2{146}</b> |    |
| <b>2{147}</b> |  |
| <b>2{148}</b> |  |

|               |                                                                                       |
|---------------|---------------------------------------------------------------------------------------|
| <b>2{149}</b> | 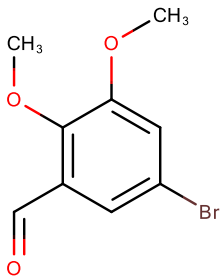   |
| <b>2{150}</b> |    |
| <b>2{151}</b> |  |
| <b>2{152}</b> |  |

|            |                                                                                     |
|------------|-------------------------------------------------------------------------------------|
| $2\{153\}$ | 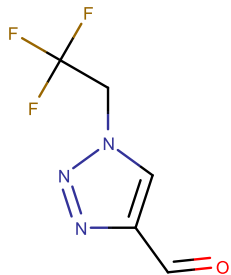   |
| $2\{154\}$ |    |
| $2\{155\}$ |  |
| $2\{156\}$ |  |

|            |                                                                                       |
|------------|---------------------------------------------------------------------------------------|
| $2\{157\}$ | 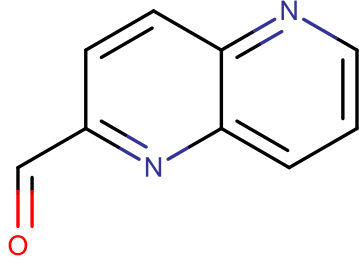   |
| $2\{158\}$ |    |
| $2\{159\}$ |  |
| $2\{160\}$ |  |

|            |                                                                                                                           |
|------------|---------------------------------------------------------------------------------------------------------------------------|
| $2\{161\}$ | 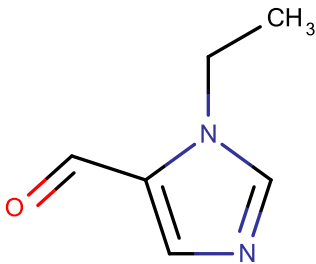<br><chem>CCCN=C1C=CN=C1C=O</chem>       |
| $2\{162\}$ | <br><chem>COc1cc(C)cc(C=O)cn1</chem>     |
| $2\{163\}$ | <br><chem>Fc1cc(I)cc(C=O)cn1</chem>    |
| $2\{164\}$ | <br><chem>CC1=CN2C(=N1)C=CC2=CO</chem> |

|            |                                                                                                                                       |
|------------|---------------------------------------------------------------------------------------------------------------------------------------|
| $2\{165\}$ | 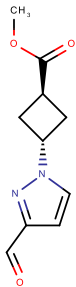<br><chem>COC(=O)[C@H]1CC[C@H]1N2C=CC=N2C=O</chem> |
| $2\{166\}$ | <br><chem>C1CC1c2cc(C=O)ccn2</chem>                |
| $2\{167\}$ | <br><chem>O=C1NC=CN1</chem>                      |
| $2\{168\}$ | <br><chem>O=C1C=CCO1</chem>                      |

|               |                                                                                                                                    |
|---------------|------------------------------------------------------------------------------------------------------------------------------------|
| <b>2{169}</b> | 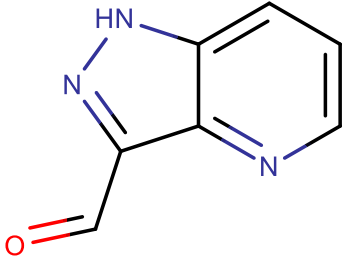<br><chem>O=CCC1=CNC2=CC=CC=C12</chem>            |
| <b>2{170}</b> | <br><chem>O=CCC1=NN=NN1</chem>                    |
| <b>2{171}</b> | <br><chem>O=C[C@@H]1[C@H](OC)[C@H](OC)O1</chem> |
| <b>2{172}</b> | <br><chem>O=Cc1c[nH]c2ccccc12C3CC3</chem>       |

|               |                                                                                                                               |
|---------------|-------------------------------------------------------------------------------------------------------------------------------|
| <b>2{173}</b> | 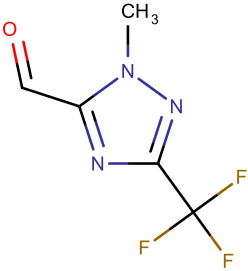<br><chem>O=Cc1c(C(F)(F)F)nn(C)n1</chem>   |
| <b>2{174}</b> | <br><chem>O=CCC1=NN=CN1</chem>             |
| <b>2{175}</b> | <br><chem>O=Cc1c[nH]cn1</chem>           |
| <b>2{176}</b> | <br><chem>O=Cc1cc(C(=O)OC)c(Cl)s1</chem> |

|                |                                                                                     |
|----------------|-------------------------------------------------------------------------------------|
| <b>2</b> {177} | 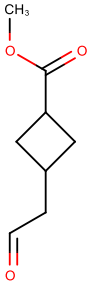   |
| <b>2</b> {178} |    |
| <b>2</b> {179} |   |
| <b>2</b> {180} |  |

|                |                                                                                       |
|----------------|---------------------------------------------------------------------------------------|
| <b>2</b> {181} | 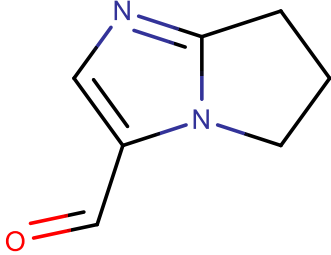   |
| <b>2</b> {182} |    |
| <b>2</b> {183} |  |
| <b>2</b> {184} |  |



|               |                                                                                     |
|---------------|-------------------------------------------------------------------------------------|
| <b>2{185}</b> | 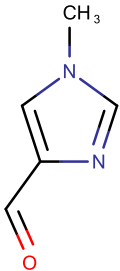   |
| <b>2{186}</b> |    |
| <b>2{187}</b> |   |
| <b>2{188}</b> |  |

|               |                                                                                       |
|---------------|---------------------------------------------------------------------------------------|
| <b>2{189}</b> | 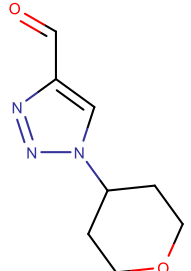   |
| <b>2{190}</b> |    |
| <b>2{191}</b> |  |
| <b>2{192}</b> |  |

|               |                                                                                     |
|---------------|-------------------------------------------------------------------------------------|
| <b>2{193}</b> | 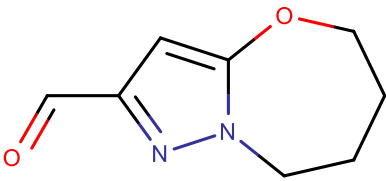   |
| <b>2{194}</b> |    |
| <b>2{195}</b> |   |
| <b>2{196}</b> |  |

|               |                                                                                       |
|---------------|---------------------------------------------------------------------------------------|
| <b>2{197}</b> | 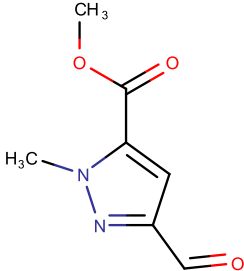   |
| <b>2{198}</b> |    |
| <b>2{199}</b> |  |
| <b>2{200}</b> |  |

|               |                                                                                     |
|---------------|-------------------------------------------------------------------------------------|
| <b>2{201}</b> | 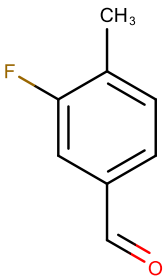   |
| <b>2{202}</b> |    |
| <b>2{203}</b> |   |
| <b>2{204}</b> |  |

|               |                                                                                       |
|---------------|---------------------------------------------------------------------------------------|
| <b>2{205}</b> | 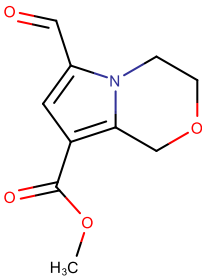   |
| <b>2{206}</b> |    |
| <b>2{207}</b> |   |
| <b>2{208}</b> |  |

|            |                                                                                     |
|------------|-------------------------------------------------------------------------------------|
| $2\{209\}$ | 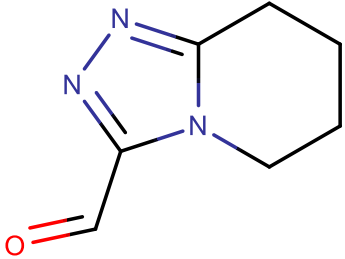   |
| $2\{210\}$ |    |
| $2\{211\}$ |  |
| $2\{212\}$ |  |

|            |                                                                                       |
|------------|---------------------------------------------------------------------------------------|
| $2\{213\}$ | 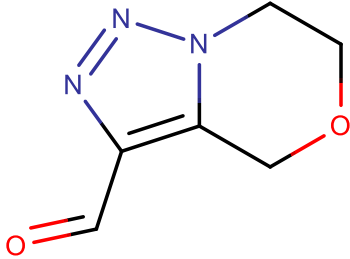   |
| $2\{214\}$ |    |
| $2\{215\}$ |   |
| $2\{216\}$ |  |

|               |                                                                                     |
|---------------|-------------------------------------------------------------------------------------|
| <b>2{217}</b> | 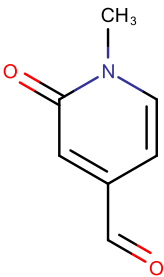   |
| <b>2{218}</b> |    |
| <b>2{219}</b> |  |
| <b>2{220}</b> |  |

|               |                                                                                       |
|---------------|---------------------------------------------------------------------------------------|
| <b>2{221}</b> | 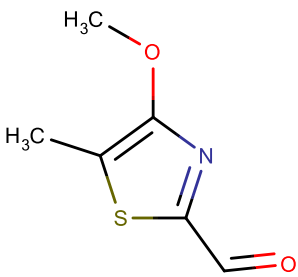   |
| <b>2{222}</b> |    |
| <b>2{223}</b> |  |
| <b>2{224}</b> |  |

|        |                                                                                     |
|--------|-------------------------------------------------------------------------------------|
| 2{225} | 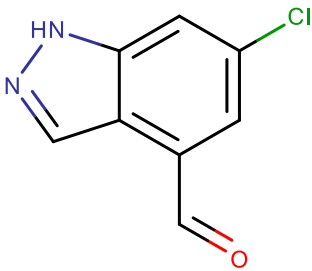   |
| 2{226} |    |
| 2{227} |  |
| 2{228} |  |

|        |                                                                                       |
|--------|---------------------------------------------------------------------------------------|
| 2{229} | 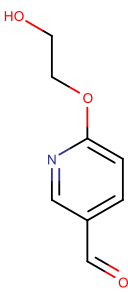   |
| 2{230} |    |
| 2{231} |  |
| 2{232} |  |

|        |                                                                                     |
|--------|-------------------------------------------------------------------------------------|
| 2{233} | 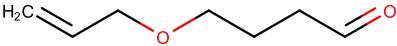   |
| 2{234} |    |
| 2{235} |  |
| 2{236} |  |

|        |                                                                                       |
|--------|---------------------------------------------------------------------------------------|
| 2{237} | 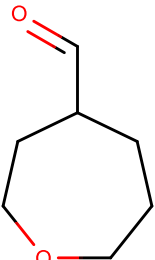   |
| 2{238} |    |
| 2{239} |  |
| 2{240} |  |

|        |                                                                                     |
|--------|-------------------------------------------------------------------------------------|
| 2{241} | 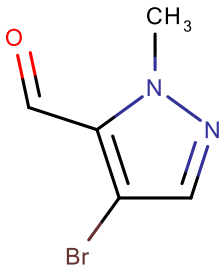   |
| 2{242} |    |
| 2{243} |  |
| 2{244} |  |

|        |                                                                                       |
|--------|---------------------------------------------------------------------------------------|
| 2{245} | 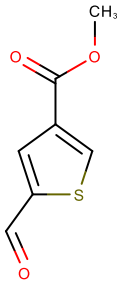   |
| 2{246} |    |
| 2{247} |   |
| 2{248} |  |



|        |  |
|--------|--|
| 2{249} |  |
| 2{250} |  |
| 2{251} |  |
| 2{252} |  |

|        |  |
|--------|--|
| 2{253} |  |
| 2{254} |  |
| 2{255} |  |
| 2{256} |  |

|               |                                                                                     |
|---------------|-------------------------------------------------------------------------------------|
| <b>2{257}</b> | 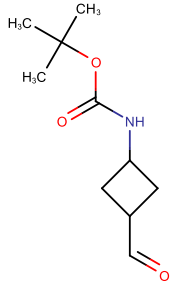   |
| <b>2{258}</b> |    |
| <b>2{259}</b> |   |
| <b>2{260}</b> |  |

|               |                                                                                       |
|---------------|---------------------------------------------------------------------------------------|
| <b>2{261}</b> | 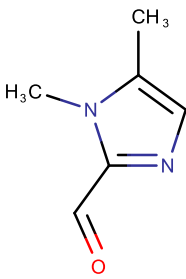   |
| <b>2{262}</b> |    |
| <b>2{263}</b> |  |
| <b>2{264}</b> |  |

|               |                                                                                     |
|---------------|-------------------------------------------------------------------------------------|
| <b>2{265}</b> | 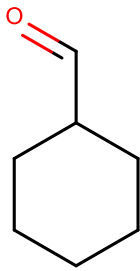   |
| <b>2{266}</b> |    |
| <b>2{267}</b> |   |
| <b>2{268}</b> |  |

|               |                                                                                       |
|---------------|---------------------------------------------------------------------------------------|
| <b>2{269}</b> | 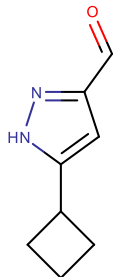   |
| <b>2{270}</b> |    |
| <b>2{271}</b> |  |
| <b>2{272}</b> |  |

|        |                                                                                     |
|--------|-------------------------------------------------------------------------------------|
| 2{273} | 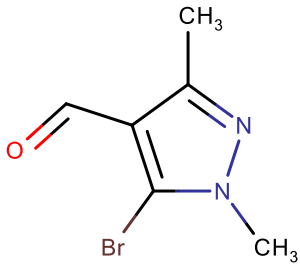   |
| 2{274} |    |
| 2{275} |  |
| 2{276} |  |

|        |                                                                                       |
|--------|---------------------------------------------------------------------------------------|
| 2{277} | 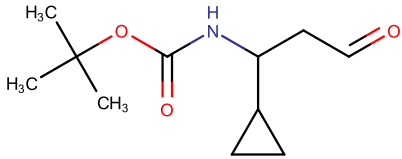   |
| 2{278} |    |
| 2{279} |  |
| 2{280} |  |

|        |                                                                                     |
|--------|-------------------------------------------------------------------------------------|
| 2{281} | 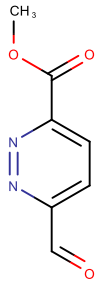   |
| 2{282} |    |
| 2{283} |  |
| 2{284} |  |

|        |                                                                                       |
|--------|---------------------------------------------------------------------------------------|
| 2{285} | 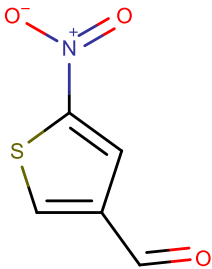   |
| 2{286} |    |
| 2{287} |  |
| 2{288} |  |

|        |                                                                                     |
|--------|-------------------------------------------------------------------------------------|
| 2{289} | 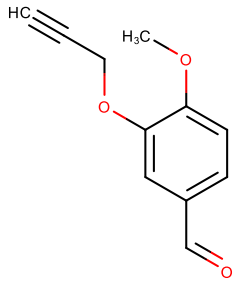   |
| 2{290} |    |
| 2{291} |   |
| 2{292} |  |

|        |                                                                                       |
|--------|---------------------------------------------------------------------------------------|
| 2{293} | 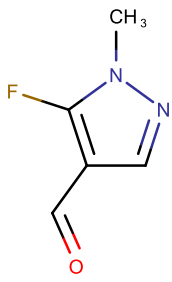   |
| 2{294} |    |
| 2{295} |   |
| 2{296} |  |

|        |                                                                                     |
|--------|-------------------------------------------------------------------------------------|
| 2{297} | 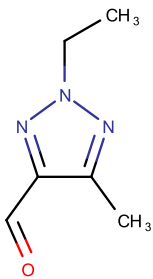   |
| 2{298} |    |
| 2{299} |   |
| 2{300} |  |

|        |                                                                                       |
|--------|---------------------------------------------------------------------------------------|
| 2{301} | 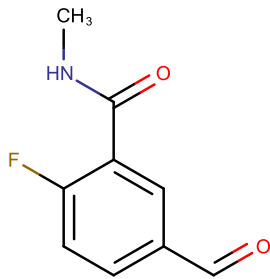   |
| 2{302} |    |
| 2{303} |   |
| 2{304} |  |

|        |                                                                                     |
|--------|-------------------------------------------------------------------------------------|
| 2{305} | 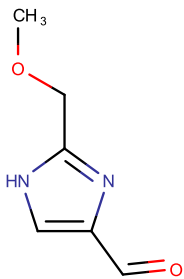   |
| 2{306} |    |
| 2{307} |  |
| 2{308} |  |

|        |                                                                                       |
|--------|---------------------------------------------------------------------------------------|
| 2{309} | 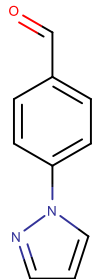   |
| 2{310} |    |
| 2{311} |   |
| 2{312} |  |



|               |                                                                                     |
|---------------|-------------------------------------------------------------------------------------|
| <b>2{313}</b> | 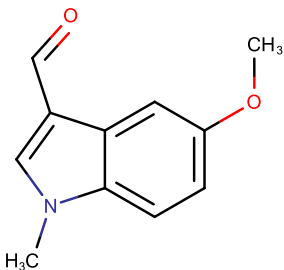   |
| <b>2{314}</b> |    |
| <b>2{315}</b> |   |
| <b>2{316}</b> |  |

|               |                                                                                       |
|---------------|---------------------------------------------------------------------------------------|
| <b>2{317}</b> | 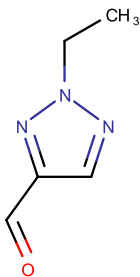   |
| <b>2{318}</b> |    |
| <b>2{319}</b> |   |
| <b>2{320}</b> |  |

|        |                                                                                     |
|--------|-------------------------------------------------------------------------------------|
| 2{321} | 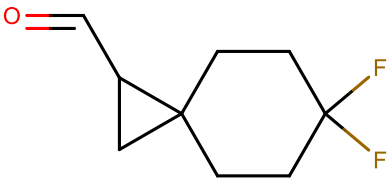   |
| 2{322} |    |
| 2{323} |   |
| 2{324} |  |

|        |                                                                                       |
|--------|---------------------------------------------------------------------------------------|
| 2{325} | 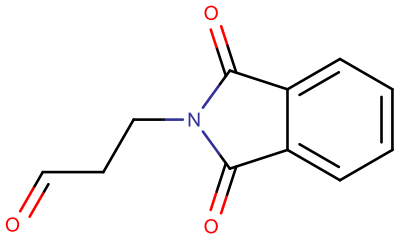   |
| 2{326} |    |
| 2{327} |  |
| 2{328} |  |

|        |                                                                                     |
|--------|-------------------------------------------------------------------------------------|
| 2{329} | 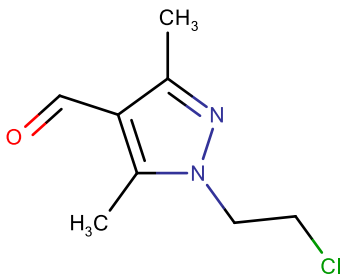   |
| 2{330} |    |
| 2{331} |   |
| 2{332} |  |

|        |                                                                                       |
|--------|---------------------------------------------------------------------------------------|
| 2{333} | 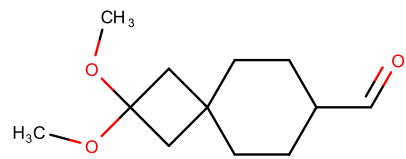   |
| 2{334} |    |
| 2{335} |   |
| 2{336} |  |

|        |                                                                                     |
|--------|-------------------------------------------------------------------------------------|
| 2{337} | 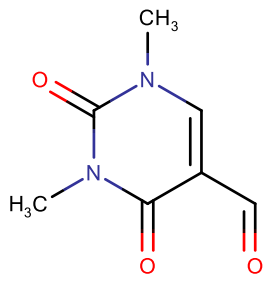   |
| 2{338} |    |
| 2{339} |   |
| 2{340} |  |

|        |                                                                                       |
|--------|---------------------------------------------------------------------------------------|
| 2{341} | 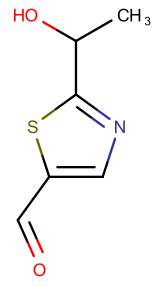   |
| 2{342} |    |
| 2{343} |   |
| 2{344} |  |

|        |                                                                                     |
|--------|-------------------------------------------------------------------------------------|
| 2{345} | 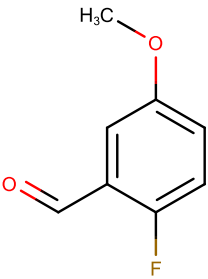   |
| 2{346} |    |
| 2{347} |  |
| 2{348} |  |

|        |                                                                                       |
|--------|---------------------------------------------------------------------------------------|
| 2{349} | 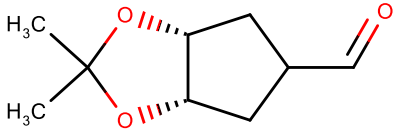   |
| 2{350} |    |
| 2{351} |  |
| 2{352} |  |

|        |                                                                                     |
|--------|-------------------------------------------------------------------------------------|
| 2{353} | 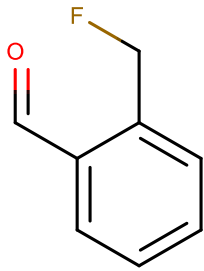   |
| 2{354} |    |
| 2{355} |   |
| 2{356} |  |

|        |                                                                                       |
|--------|---------------------------------------------------------------------------------------|
| 2{357} | 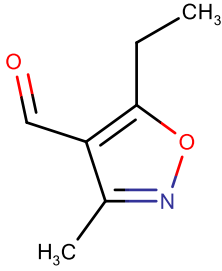   |
| 2{358} |    |
| 2{359} |   |
| 2{360} |  |

|        |                                                                                     |
|--------|-------------------------------------------------------------------------------------|
| 2{361} | 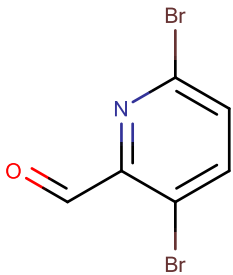   |
| 2{362} |    |
| 2{363} |  |
| 2{364} |  |

|        |                                                                                       |
|--------|---------------------------------------------------------------------------------------|
| 2{365} | 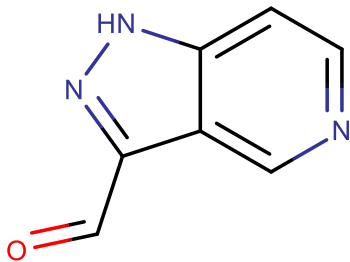   |
| 2{366} |    |
| 2{367} |   |
| 2{368} |  |

|        |                                                                                     |
|--------|-------------------------------------------------------------------------------------|
| 2{369} | 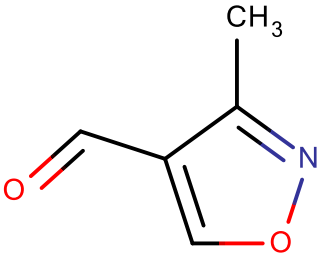   |
| 2{370} |    |
| 2{371} |  |
| 2{372} |  |

|        |                                                                                       |
|--------|---------------------------------------------------------------------------------------|
| 2{373} | 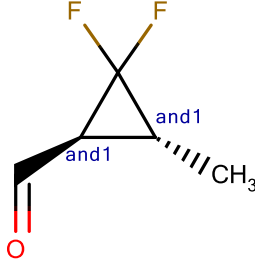   |
| 2{374} |    |
| 2{375} |  |
| 2{376} |  |



|        |                                                                                                    |
|--------|----------------------------------------------------------------------------------------------------|
| 2{377} | <chem>HCl</chem> 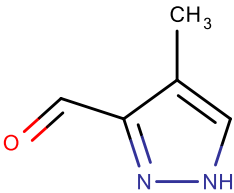 |
| 2{378} |                   |
| 2{379} |                 |
| 2{380} |                 |

|        |                                                                                       |
|--------|---------------------------------------------------------------------------------------|
| 2{381} | 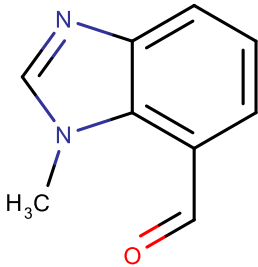   |
| 2{382} |    |
| 2{383} |   |
| 2{384} |  |

|        |                                                                                     |
|--------|-------------------------------------------------------------------------------------|
| 2{385} | 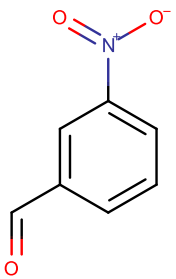   |
| 2{386} |    |
| 2{387} |  |
| 2{388} |  |

|        |                                                                                       |
|--------|---------------------------------------------------------------------------------------|
| 2{389} | 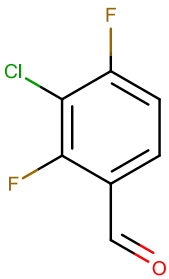   |
| 2{390} |    |
| 2{391} |  |
| 2{392} |  |

|        |                                                                                     |
|--------|-------------------------------------------------------------------------------------|
| 2{393} | 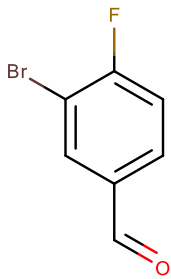   |
| 2{394} |    |
| 2{395} |   |
| 2{396} |  |

|        |                                                                                       |
|--------|---------------------------------------------------------------------------------------|
| 2{397} | 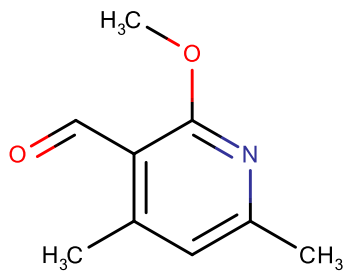   |
| 2{398} |    |
| 2{399} |   |
| 2{400} |  |

|               |                                                                                     |
|---------------|-------------------------------------------------------------------------------------|
| <b>2{401}</b> | 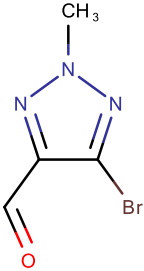   |
| <b>2{402}</b> |    |
| <b>2{403}</b> |  |
| <b>2{404}</b> |  |

|               |                                                                                       |
|---------------|---------------------------------------------------------------------------------------|
| <b>2{405}</b> | 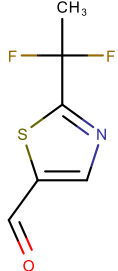   |
| <b>2{406}</b> |    |
| <b>2{407}</b> |  |
| <b>2{408}</b> |  |

|               |                                                                                     |
|---------------|-------------------------------------------------------------------------------------|
| <b>2{409}</b> | 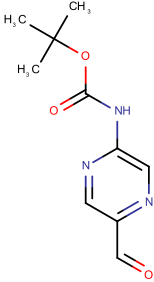   |
| <b>2{410}</b> |    |
| <b>2{411}</b> |  |
| <b>2{412}</b> |  |

|               |                                                                                       |
|---------------|---------------------------------------------------------------------------------------|
| <b>2{413}</b> | 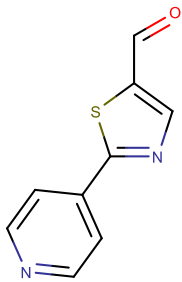   |
| <b>2{414}</b> |    |
| <b>2{415}</b> |  |
| <b>2{416}</b> |  |

|        |                                                                                     |
|--------|-------------------------------------------------------------------------------------|
| 2{417} | 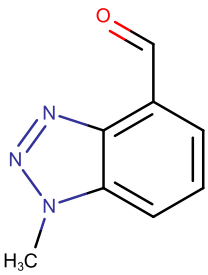   |
| 2{418} |    |
| 2{419} |  |
| 2{420} |  |

|        |                                                                                       |
|--------|---------------------------------------------------------------------------------------|
| 2{421} | 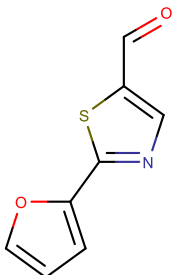   |
| 2{422} |    |
| 2{423} |  |
| 2{424} |  |

|        |                                                                                     |
|--------|-------------------------------------------------------------------------------------|
| 2{425} | 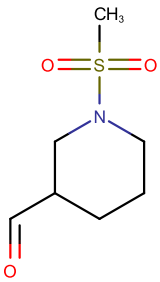   |
| 2{426} |    |
| 2{427} |  |
| 2{428} |  |

|        |                                                                                       |
|--------|---------------------------------------------------------------------------------------|
| 2{429} | 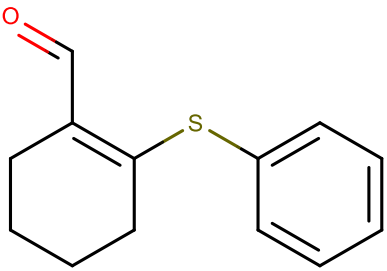   |
| 2{430} |    |
| 2{431} |   |
| 2{432} |  |

|               |                                                                                     |
|---------------|-------------------------------------------------------------------------------------|
| <b>2{433}</b> | 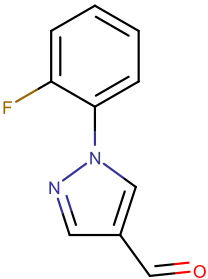   |
| <b>2{434}</b> |    |
| <b>2{435}</b> |  |
| <b>2{436}</b> |  |

|               |                                                                                       |
|---------------|---------------------------------------------------------------------------------------|
| <b>2{437}</b> | 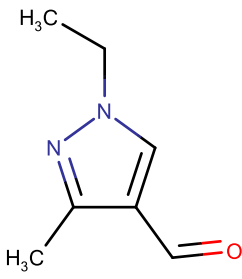   |
| <b>2{438}</b> |    |
| <b>2{439}</b> |  |
| <b>2{440}</b> |  |



|        |                                                                                     |
|--------|-------------------------------------------------------------------------------------|
| 2{441} | 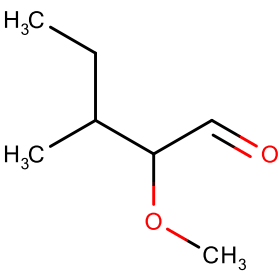   |
| 2{442} |    |
| 2{443} |   |
| 2{444} |  |

|        |                                                                                       |
|--------|---------------------------------------------------------------------------------------|
| 2{445} | 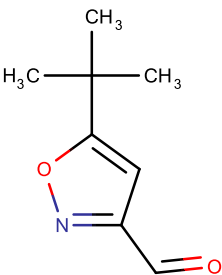   |
| 2{446} |    |
| 2{447} |   |
| 2{448} |  |

|        |                                                                                                                             |
|--------|-----------------------------------------------------------------------------------------------------------------------------|
| 2{449} | 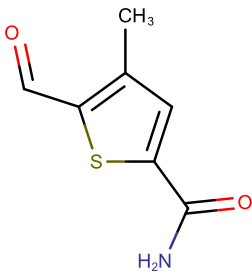 <chem>CC1=C(C=CC1=O)C(=O)N</chem>         |
| 2{450} |  <chem>CC1=CC=C(C=C1)S(=O)(=O)N(C)C</chem> |
| 2{451} |  <chem>CC1=CC=C(C=C1N)C(=O)C(F)F</chem>  |
| 2{452} |  <chem>NC(=O)C1=CC=C(C=C1)C=O</chem>     |

|        |                                                                                                                            |
|--------|----------------------------------------------------------------------------------------------------------------------------|
| 2{453} | 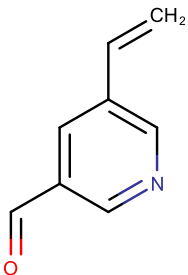 <chem>C=CC(=O)C1=CC=C(C=C1N)C=O</chem> |
| 2{454} |  <chem>CC(C)CC(=O)CO</chem>             |
| 2{455} |  <chem>CC1=C(C=CN1)C(=O)CBr</chem>    |
| 2{456} |  <chem>NC(=O)c1cc(C=O)oc1</chem>      |

|               |                                                                                     |
|---------------|-------------------------------------------------------------------------------------|
| <b>2{457}</b> | 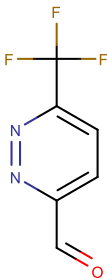   |
| <b>2{458}</b> |    |
| <b>2{459}</b> |  |
| <b>2{460}</b> |  |

|               |                                                                                       |
|---------------|---------------------------------------------------------------------------------------|
| <b>2{461}</b> | 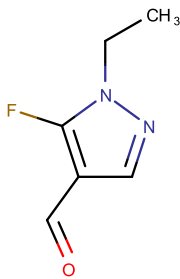   |
| <b>2{462}</b> |    |
| <b>2{463}</b> |  |
| <b>2{464}</b> |  |

|        |                                                                                     |
|--------|-------------------------------------------------------------------------------------|
| 2{465} | 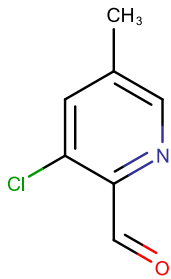   |
| 2{466} |    |
| 2{467} |  |
| 2{468} |  |

|        |                                                                                       |
|--------|---------------------------------------------------------------------------------------|
| 2{469} | 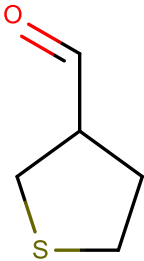   |
| 2{470} |    |
| 2{471} |  |
| 2{472} |  |

|        |                                                                                     |
|--------|-------------------------------------------------------------------------------------|
| 2{473} | 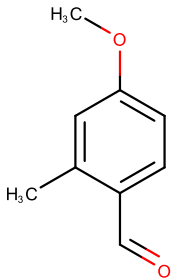   |
| 2{474} |    |
| 2{475} |  |
| 2{476} |  |

|        |                                                                                       |
|--------|---------------------------------------------------------------------------------------|
| 2{477} | 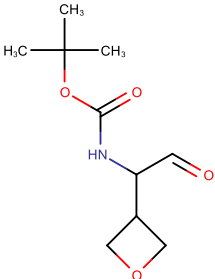   |
| 2{478} |    |
| 2{479} |   |
| 2{480} |  |

|        |                                                                                     |
|--------|-------------------------------------------------------------------------------------|
| 2{481} | 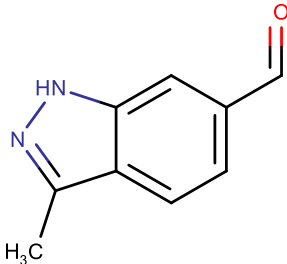   |
| 2{482} |    |
| 2{483} |  |
| 2{484} |  |

|        |                                                                                       |
|--------|---------------------------------------------------------------------------------------|
| 2{485} | 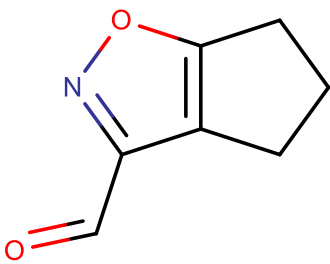   |
| 2{486} |    |
| 2{487} |  |
| 2{488} |  |

|        |                                                                                     |
|--------|-------------------------------------------------------------------------------------|
| 2{489} | 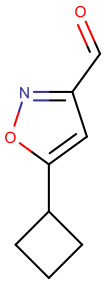   |
| 2{490} |    |
| 2{491} |  |
| 2{492} |  |

|        |                                                                                       |
|--------|---------------------------------------------------------------------------------------|
| 2{493} | 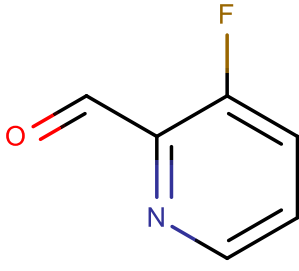   |
| 2{494} |    |
| 2{495} |  |
| 2{496} |  |

|               |                                                                                     |
|---------------|-------------------------------------------------------------------------------------|
| <b>2{497}</b> | 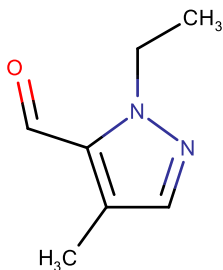   |
| <b>2{498}</b> |    |
| <b>2{499}</b> |  |
| <b>2{500}</b> |  |

|               |                                                                                       |
|---------------|---------------------------------------------------------------------------------------|
| <b>2{501}</b> | 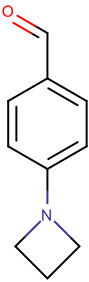   |
| <b>2{502}</b> |    |
| <b>2{503}</b> |  |
| <b>2{504}</b> |  |



|        |                                                                                                                            |
|--------|----------------------------------------------------------------------------------------------------------------------------|
| 2{505} | 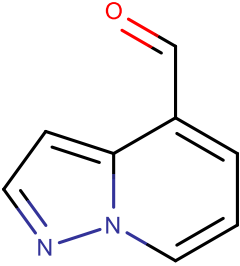<br><chem>O=Cc1ccc2c(c1)c[nH]2</chem>     |
| 2{506} | <br><chem>O=Cc1ccc2c(c1)c[nH]2Br</chem>   |
| 2{507} | <br><chem>O=Cc1ccc2c(c1)c[nH]2</chem>   |
| 2{508} | <br><chem>O=Cc1ccc(cc1)CN2CCOCC2</chem> |

|        |                                                                                                                         |
|--------|-------------------------------------------------------------------------------------------------------------------------|
| 2{509} | 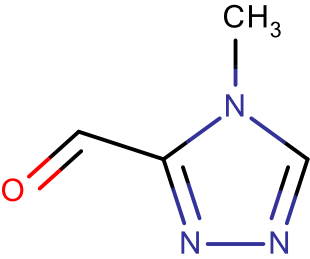<br><chem>CC1=CN=C(C=O)N1</chem>     |
| 2{510} | <br><chem>CC1=C(C=O)SC=C1N</chem>    |
| 2{511} | <br><chem>CC(C)C(=O)NCC=O</chem>   |
| 2{512} | <br><chem>CN(C)CCc1ccsc1C=O</chem> |

|               |                                                                                     |
|---------------|-------------------------------------------------------------------------------------|
| <b>2{513}</b> | 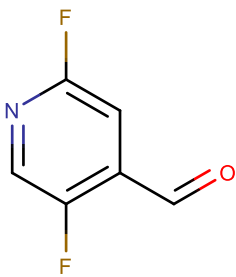   |
| <b>2{514}</b> |    |
| <b>2{515}</b> |  |
| <b>2{516}</b> |  |

|               |                                                                                       |
|---------------|---------------------------------------------------------------------------------------|
| <b>2{517}</b> | 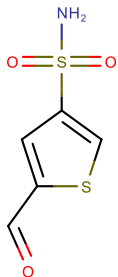   |
| <b>2{518}</b> |    |
| <b>2{519}</b> |  |
| <b>2{520}</b> |  |

|        |                                                                                     |
|--------|-------------------------------------------------------------------------------------|
| 2{521} | 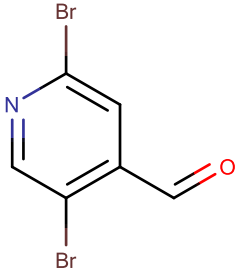   |
| 2{522} |    |
| 2{523} |  |
| 2{524} |  |

|        |                                                                                       |
|--------|---------------------------------------------------------------------------------------|
| 2{525} | 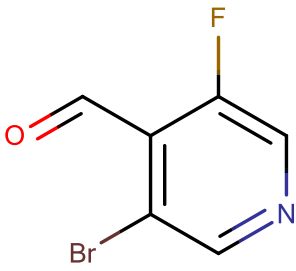   |
| 2{526} |    |
| 2{527} |  |
| 2{528} |  |

|        |                                                                                     |
|--------|-------------------------------------------------------------------------------------|
| 2{529} | 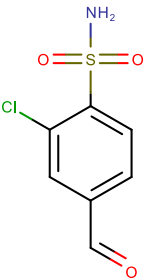   |
| 2{530} |    |
| 2{531} |  |
| 2{532} |  |

|        |                                                                                       |
|--------|---------------------------------------------------------------------------------------|
| 2{533} | 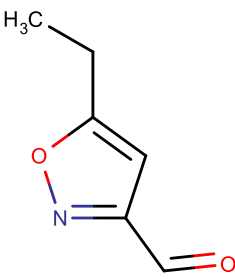   |
| 2{534} |    |
| 2{535} |  |
| 2{536} |  |

|        |  |
|--------|--|
| 2{537} |  |
| 2{538} |  |
| 2{539} |  |
| 2{540} |  |

|        |  |
|--------|--|
| 2{541} |  |
| 2{542} |  |
| 2{543} |  |
| 2{544} |  |

|        |                                                                                     |
|--------|-------------------------------------------------------------------------------------|
| 2{545} | 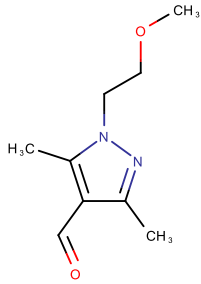   |
| 2{546} |    |
| 2{547} |   |
| 2{548} |  |

|        |                                                                                       |
|--------|---------------------------------------------------------------------------------------|
| 2{549} | 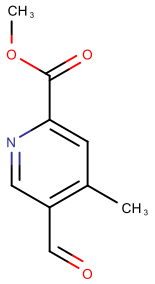   |
| 2{550} |    |
| 2{551} |   |
| 2{552} |  |

|        |                                                                                     |
|--------|-------------------------------------------------------------------------------------|
| 2{553} | 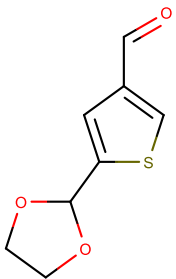   |
| 2{554} |    |
| 2{555} |   |
| 2{556} |  |

|        |                                                                                       |
|--------|---------------------------------------------------------------------------------------|
| 2{557} | 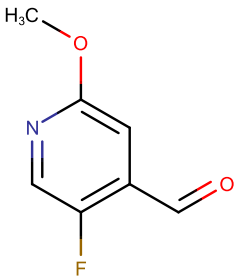   |
| 2{558} |    |
| 2{559} |   |
| 2{560} |  |

|        |                                                                                                                            |
|--------|----------------------------------------------------------------------------------------------------------------------------|
| 2{561} | 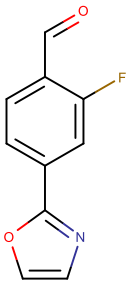 <chem>O=C1C=CC(=C1)c2ncoc2F</chem>       |
| 2{562} |  <chem>COc1cc(C)ccc1C=O</chem>            |
| 2{563} |  <chem>CC(=O)Nc1ccncc1-c2ccncc2=O</chem> |
| 2{564} |  <chem>CC1=CN=CN=C1C=O</chem>           |

|        |                                                                                                                                     |
|--------|-------------------------------------------------------------------------------------------------------------------------------------|
| 2{565} | 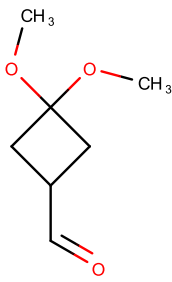 <chem>COC1(C=O)COC1</chem>                      |
| 2{566} |  <chem>Clc1nc2ccsc2c(=O)c1</chem>                |
| 2{567} |  <chem>CC1=NC2=CC=CC=C2N1C=CC=O</chem>         |
| 2{568} |  <chem>O=C1C=NC(=C1S2=CC=CC=N2)c3ccncc3</chem> |



|        |                                                                                     |
|--------|-------------------------------------------------------------------------------------|
| 2{569} | 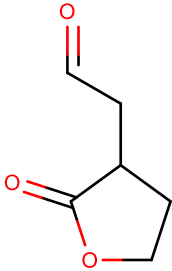   |
| 2{570} |    |
| 2{571} |  |
| 2{572} |  |

|        |                                                                                       |
|--------|---------------------------------------------------------------------------------------|
| 2{573} | 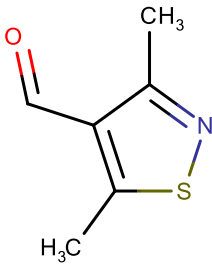   |
| 2{574} |    |
| 2{575} |  |
| 2{576} |  |

|        |                                                                                     |
|--------|-------------------------------------------------------------------------------------|
| 2{577} | 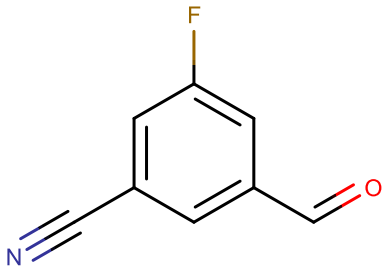   |
| 2{578} |    |
| 2{579} |  |
| 2{580} |  |

|        |                                                                                       |
|--------|---------------------------------------------------------------------------------------|
| 2{581} | 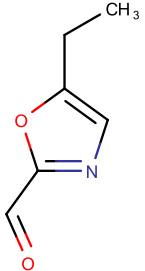   |
| 2{582} |    |
| 2{583} |  |
| 2{584} |  |

|        |                                                                                     |
|--------|-------------------------------------------------------------------------------------|
| 2{585} | 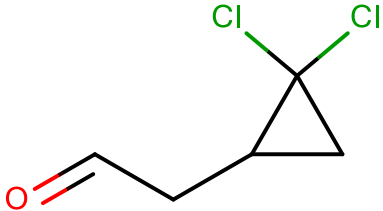   |
| 2{586} |    |
| 2{587} |  |
| 2{588} |  |

|        |                                                                                       |
|--------|---------------------------------------------------------------------------------------|
| 2{589} | 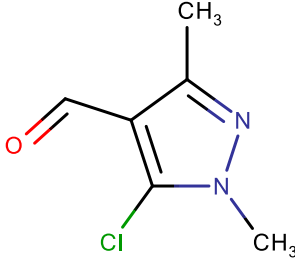   |
| 2{590} |    |
| 2{591} |   |
| 2{592} |  |

|        |                                                                                     |
|--------|-------------------------------------------------------------------------------------|
| 2{593} | 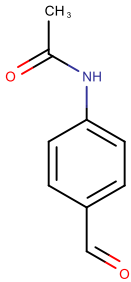   |
| 2{594} |    |
| 2{595} |  |
| 2{596} |  |

|        |                                                                                       |
|--------|---------------------------------------------------------------------------------------|
| 2{597} | 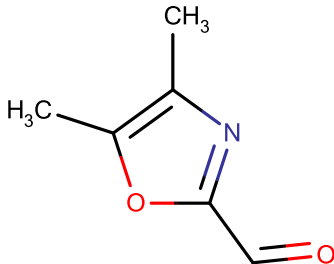   |
| 2{598} |    |
| 2{599} |   |
| 2{600} |  |

|               |                                                                                     |
|---------------|-------------------------------------------------------------------------------------|
| <b>2{601}</b> | 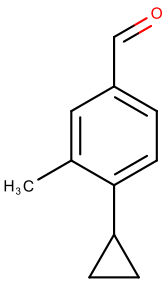   |
| <b>2{602}</b> |    |
| <b>2{603}</b> |   |
| <b>2{604}</b> |  |

|               |                                                                                       |
|---------------|---------------------------------------------------------------------------------------|
| <b>2{605}</b> | 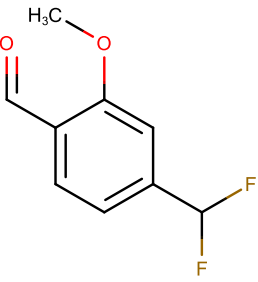   |
| <b>2{606}</b> |    |
| <b>2{607}</b> |   |
| <b>2{608}</b> |  |

|               |                                                                                     |
|---------------|-------------------------------------------------------------------------------------|
| <b>2{609}</b> | 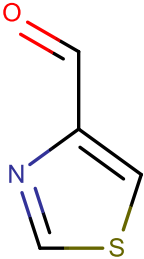   |
| <b>2{610}</b> |    |
| <b>2{611}</b> |  |
| <b>2{612}</b> |  |

|               |                                                                                       |
|---------------|---------------------------------------------------------------------------------------|
| <b>2{613}</b> | 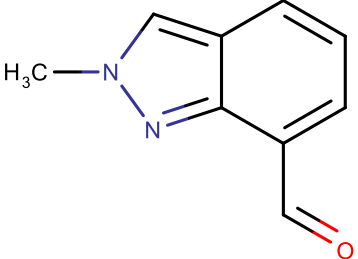   |
| <b>2{614}</b> |    |
| <b>2{615}</b> |  |
| <b>2{616}</b> |  |

|        |                                                                                                                             |
|--------|-----------------------------------------------------------------------------------------------------------------------------|
| 2{617} | 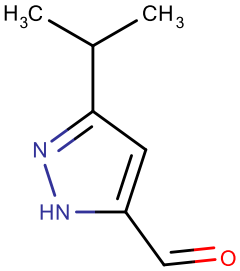 <chem>CC(C)c1c[nH]c(C=O)c1</chem>         |
| 2{618} |  <chem>CC1=CC=C(C(F)F)C(C=O)=C1</chem>     |
| 2{619} |  <chem>COc1cc(C=O)cc(S(=O)(=O)C)c1</chem> |
| 2{620} |  <chem>CC1=C(Cl)N=CN1C=O</chem>          |

|        |                                                                                                                                 |
|--------|---------------------------------------------------------------------------------------------------------------------------------|
| 2{621} | 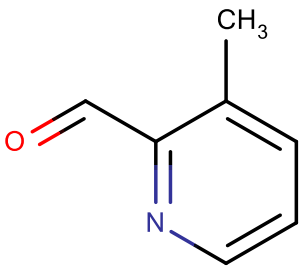 <chem>CC1=CC=CC(=C1N)C=O</chem>             |
| 2{622} |  <chem>CC(=O)NCCOC(=O)COc1ccc(C=O)cc1</chem> |
| 2{623} |  <chem>COc1cc(C=O)cc(OC#N)cc1</chem>        |
| 2{624} |  <chem>CC1=C(Br)N=CN1C=O</chem>            |

|        |                                                                                     |
|--------|-------------------------------------------------------------------------------------|
| 2{625} | 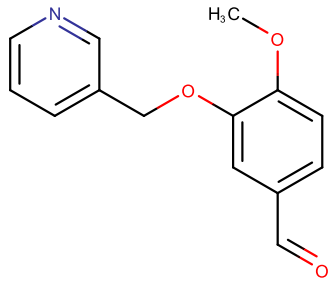   |
| 2{626} |    |
| 2{627} |   |
| 2{628} |  |

|        |                                                                                       |
|--------|---------------------------------------------------------------------------------------|
| 2{629} | 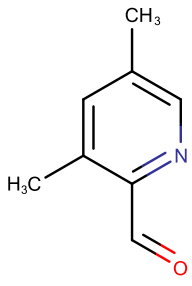   |
| 2{630} |    |
| 2{631} |   |
| 2{632} |  |



|        |                                                                                                                       |
|--------|-----------------------------------------------------------------------------------------------------------------------|
| 2{633} | 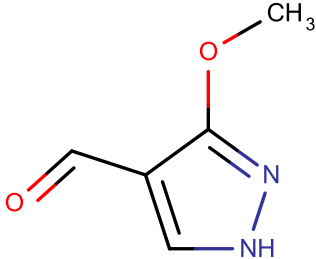 <chem>COC1=C(C=CN1)C=O</chem>       |
| 2{634} |  <chem>CC(=O)C1COCC1</chem>          |
| 2{635} |  <chem>COC(=O)c1cc(C=O)oc1=O</chem> |
| 2{636} |  <chem>CC1=C(C=CN1)C=O</chem>      |

|        |                                                                                                                                 |
|--------|---------------------------------------------------------------------------------------------------------------------------------|
| 2{637} | 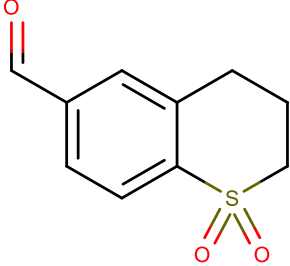 <chem>C1=CC=C2C(=C1)S(=O)(=O)CC2C=O</chem>  |
| 2{638} |  <chem>C1=CC=C2C(=C1)S(=O)(=O)CC2C=O</chem>  |
| 2{639} |  <chem>C1=CC=C2C(=C1)S(=O)(=O)CC2C=O</chem> |
| 2{640} |  <chem>CC(C)N1C=CC2=C1N=CN2C=O</chem>      |

|        |                                                                                     |
|--------|-------------------------------------------------------------------------------------|
| 2{641} | 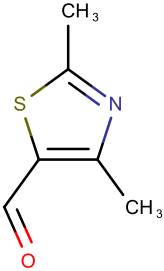   |
| 2{642} |    |
| 2{643} |  |
| 2{644} |  |

|        |                                                                                       |
|--------|---------------------------------------------------------------------------------------|
| 2{645} | 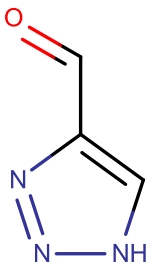   |
| 2{646} |    |
| 2{647} |  |
| 2{648} |  |

|        |                                                                                     |
|--------|-------------------------------------------------------------------------------------|
| 2{649} | 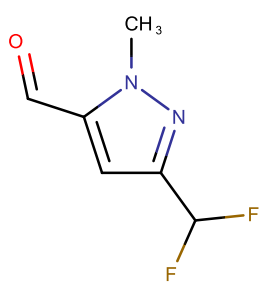   |
| 2{650} |    |
| 2{651} |   |
| 2{652} |  |

|        |                                                                                       |
|--------|---------------------------------------------------------------------------------------|
| 2{653} | 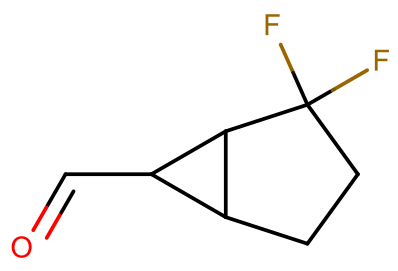   |
| 2{654} |    |
| 2{655} |   |
| 2{656} |  |

|        |                                                                                                                             |
|--------|-----------------------------------------------------------------------------------------------------------------------------|
| 2{657} | 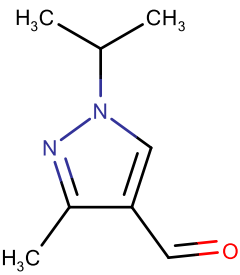 <chem>CC(C)N1C=CC(=N1)C(=O)C</chem>       |
| 2{658} |  <chem>CC(C)(C)OC(=O)NC1=NC(=S1)C=O</chem> |
| 2{659} |  <chem>CC1=NC2=C(C1)C=CC=C2C=O</chem>    |
| 2{660} |  <chem>C1=CC=C(S1)C=O</chem>             |

|        |                                                                                                                                     |
|--------|-------------------------------------------------------------------------------------------------------------------------------------|
| 2{661} | 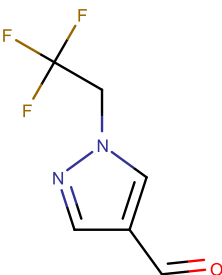 <chem>FFC(F)CN1C=CC(=N1)C=O</chem>              |
| 2{662} |  <chem>CC1=CC=C(C=C1C=O)P(=O)(C)C</chem>         |
| 2{663} |  <chem>COc1cc(OC(=O)N)ccc1Oc2ccc(C=O)cc2</chem> |
| 2{664} |  <chem>COC1=CC(=C(C=C1C=O)OC)C</chem>          |

|        |                                                                                     |
|--------|-------------------------------------------------------------------------------------|
| 2{665} | 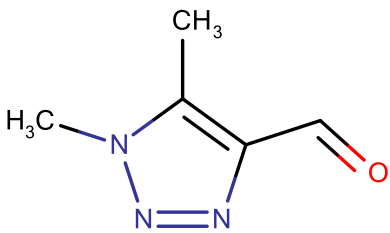   |
| 2{666} |    |
| 2{667} |  |
| 2{668} |  |

|        |                                                                                       |
|--------|---------------------------------------------------------------------------------------|
| 2{669} | 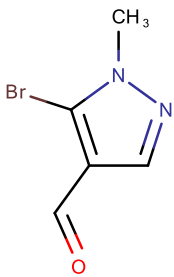   |
| 2{670} |    |
| 2{671} |  |
| 2{672} |  |

|        |                                                                                     |
|--------|-------------------------------------------------------------------------------------|
| 2{673} | 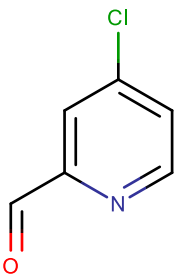   |
| 2{674} |    |
| 2{675} |   |
| 2{676} |  |

|        |                                                                                       |
|--------|---------------------------------------------------------------------------------------|
| 2{677} | 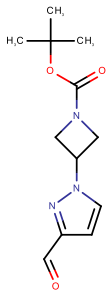   |
| 2{678} |    |
| 2{679} |   |
| 2{680} |  |

|               |                                                                                     |
|---------------|-------------------------------------------------------------------------------------|
| <b>2{681}</b> | 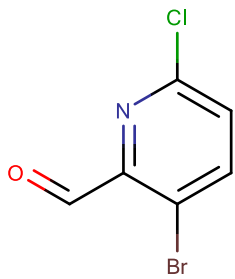   |
| <b>2{682}</b> |    |
| <b>2{683}</b> |  |
| <b>2{684}</b> |  |

|               |                                                                                       |
|---------------|---------------------------------------------------------------------------------------|
| <b>2{685}</b> | 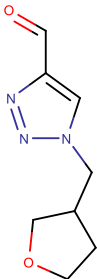   |
| <b>2{686}</b> |    |
| <b>2{687}</b> |  |
| <b>2{688}</b> |  |

|               |                                                                                     |
|---------------|-------------------------------------------------------------------------------------|
| <b>2{689}</b> | 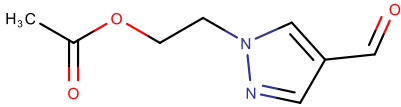   |
| <b>2{690}</b> |    |
| <b>2{691}</b> |  |
| <b>2{692}</b> |  |

|               |                                                                                       |
|---------------|---------------------------------------------------------------------------------------|
| <b>2{693}</b> | 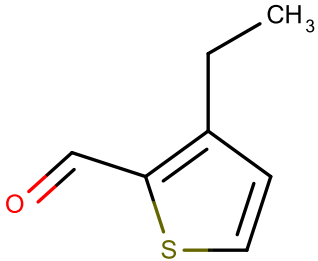   |
| <b>2{694}</b> |    |
| <b>2{695}</b> |  |
| <b>2{696}</b> |  |



|        |                                                                                                                            |
|--------|----------------------------------------------------------------------------------------------------------------------------|
| 2{697} | 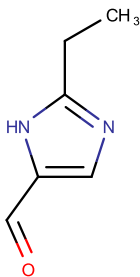 <chem>CCc1c[nH]c(C=O)c1</chem>           |
| 2{698} |  <chem>CC(C)(C)OC(=O)N1CCCCC1C=O</chem>   |
| 2{699} |  <chem>CC(C)(C)OC(=O)N1CCCCC1C=O</chem>  |
| 2{700} |  <chem>CC(C)(C)OC(=O)N1CCCCC1C=O</chem> |

|        |                                                                                                                                   |
|--------|-----------------------------------------------------------------------------------------------------------------------------------|
| 2{701} | 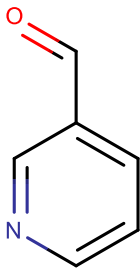 <chem>O=Cc1ccncc1</chem>                      |
| 2{702} |  <chem>CC(C)C(C=O)CC(=O)N1CCCCC1C=O</chem>     |
| 2{703} |  <chem>Clc1ccc2c(c1)cnc(C=O)c2</chem>        |
| 2{704} |  <chem>CC1=NC(=C2C(=N1)N=CN2)C3CC3C=O</chem> |

|               |  |
|---------------|--|
| <b>2{705}</b> |  |
| <b>2{706}</b> |  |
| <b>2{707}</b> |  |
| <b>2{708}</b> |  |

|               |  |
|---------------|--|
| <b>2{709}</b> |  |
| <b>2{710}</b> |  |
| <b>2{711}</b> |  |
| <b>2{712}</b> |  |

|               |                                                                                     |
|---------------|-------------------------------------------------------------------------------------|
| <b>2{713}</b> | 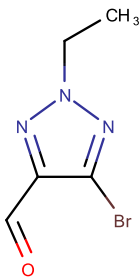   |
| <b>2{714}</b> |    |
| <b>2{715}</b> |  |
| <b>2{716}</b> |  |

|               |                                                                                       |
|---------------|---------------------------------------------------------------------------------------|
| <b>2{717}</b> | 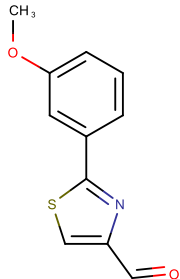   |
| <b>2{718}</b> |    |
| <b>2{719}</b> |  |
| <b>2{720}</b> |  |

|        |                                                                                     |
|--------|-------------------------------------------------------------------------------------|
| 2{721} | 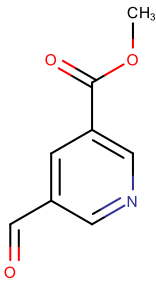   |
| 2{722} |    |
| 2{723} |  |
| 2{724} |  |

|        |                                                                                       |
|--------|---------------------------------------------------------------------------------------|
| 2{725} | 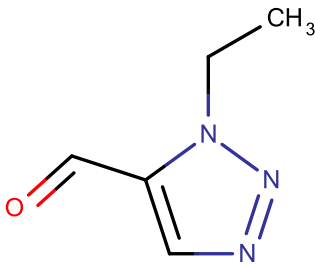   |
| 2{726} |    |
| 2{727} |   |
| 2{728} |  |

|        |                                                                                     |
|--------|-------------------------------------------------------------------------------------|
| 2{729} | 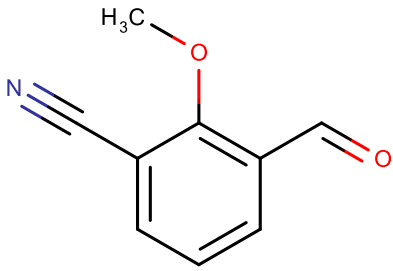   |
| 2{730} |    |
| 2{731} |  |
| 2{732} |  |

|        |                                                                                       |
|--------|---------------------------------------------------------------------------------------|
| 2{733} | 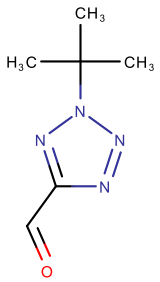   |
| 2{734} |    |
| 2{735} |   |
| 2{736} |  |

|               |                                                                                     |
|---------------|-------------------------------------------------------------------------------------|
| <b>2{737}</b> | 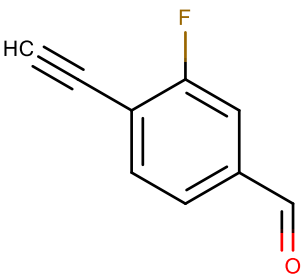   |
| <b>2{738}</b> |    |
| <b>2{739}</b> |  |
| <b>2{740}</b> |  |

|               |                                                                                       |
|---------------|---------------------------------------------------------------------------------------|
| <b>2{741}</b> | 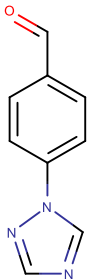   |
| <b>2{742}</b> |    |
| <b>2{743}</b> |  |
| <b>2{744}</b> |  |

|        |                                                                                     |
|--------|-------------------------------------------------------------------------------------|
| 2{745} | 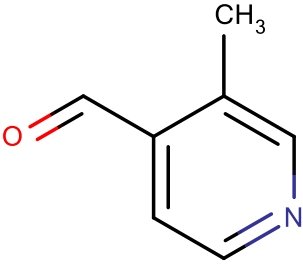   |
| 2{746} |    |
| 2{747} |   |
| 2{748} |  |

|        |                                                                                       |
|--------|---------------------------------------------------------------------------------------|
| 2{749} | 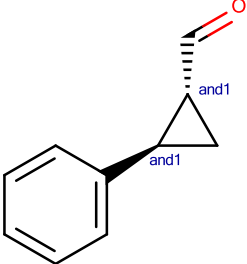   |
| 2{750} |    |
| 2{751} |   |
| 2{752} |  |

|               |                                                                                     |
|---------------|-------------------------------------------------------------------------------------|
| <b>2{753}</b> | 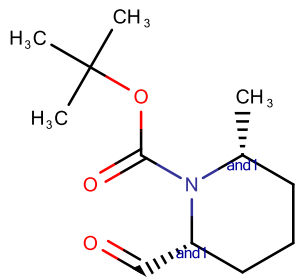   |
| <b>2{754}</b> |    |
| <b>2{755}</b> |  |
| <b>2{756}</b> |  |

|               |                                                                                       |
|---------------|---------------------------------------------------------------------------------------|
| <b>2{757}</b> | 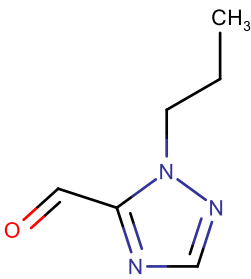   |
| <b>2{758}</b> |    |
| <b>2{759}</b> |   |
| <b>2{760}</b> |  |



|        |                                                                                     |
|--------|-------------------------------------------------------------------------------------|
| 2{761} | 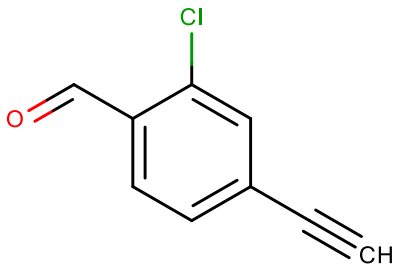   |
| 2{762} |    |
| 2{763} |  |
| 2{764} |  |

|        |                                                                                       |
|--------|---------------------------------------------------------------------------------------|
| 2{765} | 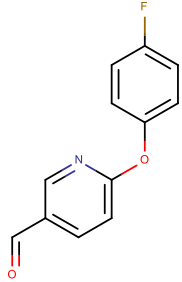   |
| 2{766} |    |
| 2{767} |  |
| 2{768} |  |

|        |                                                                                     |
|--------|-------------------------------------------------------------------------------------|
| 2{769} | 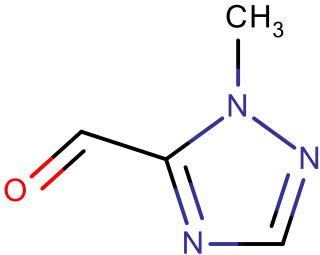   |
| 2{770} |    |
| 2{771} |   |
| 2{772} |  |

|        |                                                                                       |
|--------|---------------------------------------------------------------------------------------|
| 2{773} | 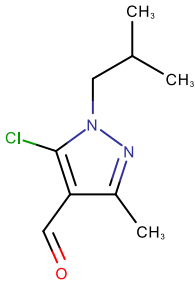   |
| 2{774} |    |
| 2{775} |   |
| 2{776} |  |

|                |                                                                                     |
|----------------|-------------------------------------------------------------------------------------|
| <b>2</b> {777} | 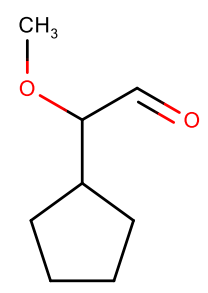   |
| <b>2</b> {778} |    |
| <b>2</b> {779} |   |
| <b>2</b> {780} |  |

|                |                                                                                       |
|----------------|---------------------------------------------------------------------------------------|
| <b>2</b> {781} | 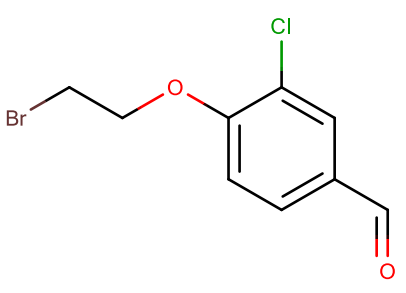   |
| <b>2</b> {782} |    |
| <b>2</b> {783} |   |
| <b>2</b> {784} |  |

|        |                                                                                     |
|--------|-------------------------------------------------------------------------------------|
| 2{785} | 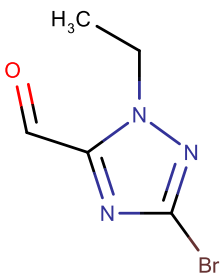   |
| 2{786} |    |
| 2{787} |  |
| 2{788} |  |

|        |                                                                                       |
|--------|---------------------------------------------------------------------------------------|
| 2{789} | 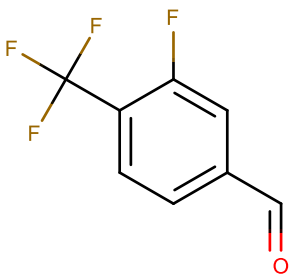   |
| 2{790} |    |
| 2{791} |  |
| 2{792} |  |

|               |                                                                                     |
|---------------|-------------------------------------------------------------------------------------|
| <b>2{793}</b> | 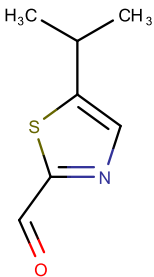   |
| <b>2{794}</b> |    |
| <b>2{795}</b> |   |
| <b>2{796}</b> |  |

|               |                                                                                       |
|---------------|---------------------------------------------------------------------------------------|
| <b>2{797}</b> | 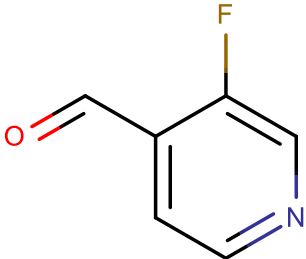   |
| <b>2{798}</b> |    |
| <b>2{799}</b> |   |
| <b>2{800}</b> |  |

|               |                                                                                     |
|---------------|-------------------------------------------------------------------------------------|
| <b>2{801}</b> | 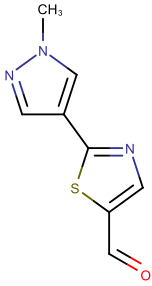   |
| <b>2{802}</b> |    |
| <b>2{803}</b> |   |
| <b>2{804}</b> |  |

|               |                                                                                       |
|---------------|---------------------------------------------------------------------------------------|
| <b>2{805}</b> | 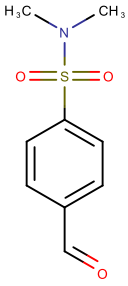   |
| <b>2{806}</b> |    |
| <b>2{807}</b> |  |
| <b>2{808}</b> |  |

|               |                                                                                     |
|---------------|-------------------------------------------------------------------------------------|
| <b>2{809}</b> | 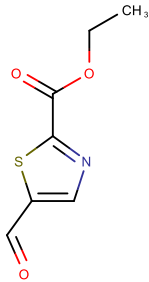   |
| <b>2{810}</b> |    |
| <b>2{811}</b> |   |
| <b>2{812}</b> |  |

|               |                                                                                       |
|---------------|---------------------------------------------------------------------------------------|
| <b>2{813}</b> | 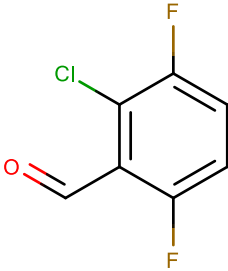   |
| <b>2{814}</b> |    |
| <b>2{815}</b> |  |
| <b>2{816}</b> |  |

|               |                                                                                     |
|---------------|-------------------------------------------------------------------------------------|
| <b>2{817}</b> | 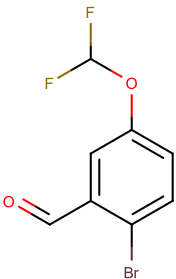   |
| <b>2{818}</b> |    |
| <b>2{819}</b> |  |
| <b>2{820}</b> |  |

|               |                                                                                       |
|---------------|---------------------------------------------------------------------------------------|
| <b>2{821}</b> | 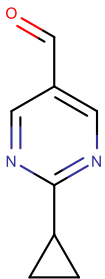   |
| <b>2{822}</b> |    |
| <b>2{823}</b> |  |
| <b>2{824}</b> |  |



|               |                                                                                     |
|---------------|-------------------------------------------------------------------------------------|
| <b>2{825}</b> | 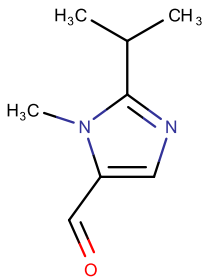   |
| <b>2{826}</b> |    |
| <b>2{827}</b> |  |
| <b>2{828}</b> |  |

|               |                                                                                       |
|---------------|---------------------------------------------------------------------------------------|
| <b>2{829}</b> | 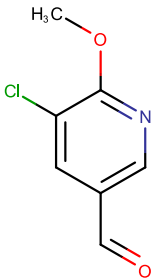   |
| <b>2{830}</b> |    |
| <b>2{831}</b> |   |
| <b>2{832}</b> |  |

|               |                                                                                     |
|---------------|-------------------------------------------------------------------------------------|
| <b>2{833}</b> | 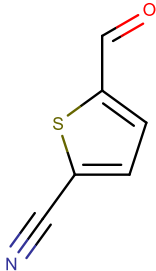   |
| <b>2{834}</b> |    |
| <b>2{835}</b> |   |
| <b>2{836}</b> |  |

|               |                                                                                       |
|---------------|---------------------------------------------------------------------------------------|
| <b>2{837}</b> | 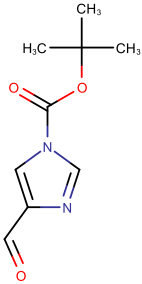   |
| <b>2{838}</b> |    |
| <b>2{839}</b> |   |
| <b>2{840}</b> |  |

|               |                                                                                     |
|---------------|-------------------------------------------------------------------------------------|
| <b>2{841}</b> | 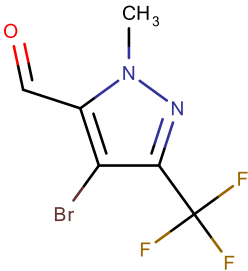   |
| <b>2{842}</b> |    |
| <b>2{843}</b> |   |
| <b>2{844}</b> |  |

|               |                                                                                       |
|---------------|---------------------------------------------------------------------------------------|
| <b>2{845}</b> | 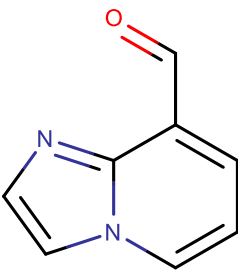   |
| <b>2{846}</b> |    |
| <b>2{847}</b> |   |
| <b>2{848}</b> |  |

|        |                                                                                     |
|--------|-------------------------------------------------------------------------------------|
| 2{849} | 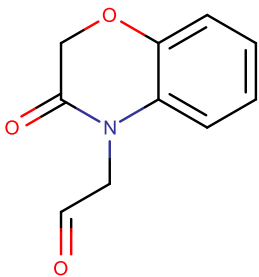   |
| 2{850} |    |
| 2{851} |   |
| 2{852} |  |

|        |                                                                                       |
|--------|---------------------------------------------------------------------------------------|
| 2{853} | 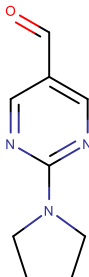   |
| 2{854} |    |
| 2{855} |   |
| 2{856} |  |

|        |                                                                                                                         |
|--------|-------------------------------------------------------------------------------------------------------------------------|
| 2{857} | 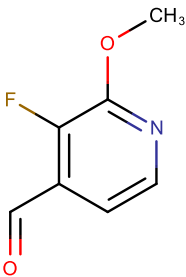 <chem>COc1cc(C=O)c(F)cn1</chem>       |
| 2{858} |  <chem>COc1cc(C=O)c(O)c(=O)o1</chem>   |
| 2{859} |  <chem>O=Cc1cc2nc3ccccc3n2c1F</chem> |
| 2{860} |  <chem>COC(=O)c1nn(C)c(C=O)n1</chem> |

|        |                                                                                                                                    |
|--------|------------------------------------------------------------------------------------------------------------------------------------|
| 2{861} | 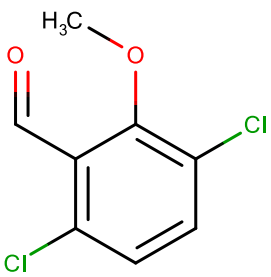 <chem>COc1cc(Cl)c(Cl)cc1C=O</chem>             |
| 2{862} |  <chem>CN(C)C(=O)c1cc(C=O)nn1S</chem>           |
| 2{863} |  <chem>CC1(C)OCc2cc(C=O)ccc21</chem>          |
| 2{864} |  <chem>COC(=O)c1ccc2c(c1)c3ccccc3n2C=O</chem> |

|        |                                                                                                                                                                                                                                                                                                                                                  |
|--------|--------------------------------------------------------------------------------------------------------------------------------------------------------------------------------------------------------------------------------------------------------------------------------------------------------------------------------------------------|
| 2{865} | 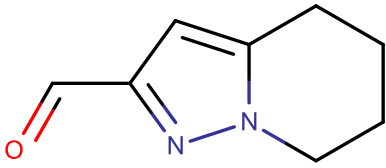 <p>Chemical structure of 2-(cyclohex-1-en-1-yl)-1H-indazole-3-carbaldehyde. It features a cyclohexene ring fused to an indazole ring, with an aldehyde group (-CHO) attached to the indazole ring.</p>                                                         |
| 2{866} |  <p>Chemical structure of 4-(2,2,2-trifluoroethoxy)butanal. It consists of a butanal chain with a 2,2,2-trifluoroethoxy group (-OCH<sub>2</sub>CF<sub>3</sub>) attached to the fourth carbon.</p>                                                               |
| 2{867} |  <p>Chemical structure of 4-(4-methoxyphenyl)-2-pyridinecarbaldehyde. It features a pyridine ring with an aldehyde group (-CHO) at the 2-position and a 4-methoxyphenyl group (-C<sub>6</sub>H<sub>4</sub>OC<sub>3</sub>H<sub>3</sub>) at the 4-position.</p> |
