# Supplementary material for: Generation of multimillion chemical space based on the parallel Groebke–Blackburn–Bienaymé reaction
Source: publisher site journal article supplement (doi:10.3762/bjoc.20.143), 2024-07-16
Supplement: Additional file 1 [file Structures of substrates 3.pdf › Structures of substrates 3.pdf]

## Structures of reactants 3

| ID          | Structure                                                                           |
|-------------|-------------------------------------------------------------------------------------|
| <b>3{1}</b> |    |
| <b>3{2}</b> |    |
| <b>3{3}</b> |  |
| <b>3{4}</b> |  |

|             |                                                                                       |
|-------------|---------------------------------------------------------------------------------------|
| <b>3{5}</b> | 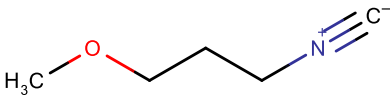   |
| <b>3{6}</b> |    |
| <b>3{7}</b> |  |
| <b>3{8}</b> |  |

|           |                                                 |
|-----------|-------------------------------------------------|
| $3\{9\}$  | $\text{H}_3\text{C}-\text{N}^+\equiv\text{C}^-$ |
| $3\{10\}$ |                                                 |
| $3\{11\}$ |                                                 |
| $3\{12\}$ |                                                 |

|           |  |
|-----------|--|
| $3\{13\}$ |  |
| $3\{14\}$ |  |
| $3\{15\}$ |  |
| $3\{16\}$ |  |

|              |                                                                                     |
|--------------|-------------------------------------------------------------------------------------|
| <b>3{17}</b> | 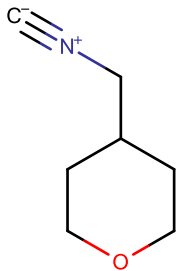   |
| <b>3{18}</b> |    |
| <b>3{19}</b> |  |
| <b>3{20}</b> |  |

|              |                                                                                       |
|--------------|---------------------------------------------------------------------------------------|
| <b>3{21}</b> | 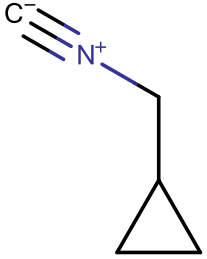   |
| <b>3{22}</b> |    |
| <b>3{23}</b> |  |
| <b>3{24}</b> |  |

|              |                                                                                     |
|--------------|-------------------------------------------------------------------------------------|
| <b>3{25}</b> | 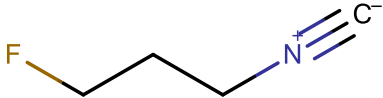   |
| <b>3{26}</b> |    |
| <b>3{27}</b> |  |
| <b>3{28}</b> |  |

|              |                                                                                       |
|--------------|---------------------------------------------------------------------------------------|
| <b>3{29}</b> | 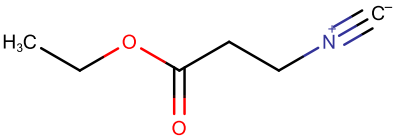   |
| <b>3{30}</b> |    |
| <b>3{31}</b> |  |
| <b>3{32}</b> |  |

|              |                                                                                     |
|--------------|-------------------------------------------------------------------------------------|
| <b>3{33}</b> | 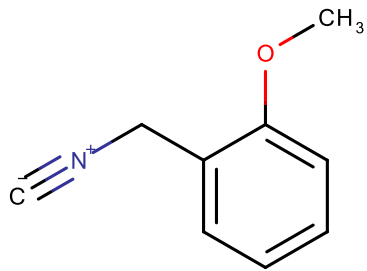   |
| <b>3{34}</b> |    |
| <b>3{35}</b> |  |
| <b>3{36}</b> |  |

|              |                                                                                       |
|--------------|---------------------------------------------------------------------------------------|
| <b>3{37}</b> | 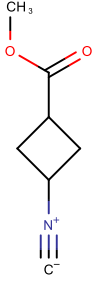   |
| <b>3{38}</b> |    |
| <b>3{39}</b> |  |
| <b>3{40}</b> |  |

|       |                                                                                     |
|-------|-------------------------------------------------------------------------------------|
| 3{41} | 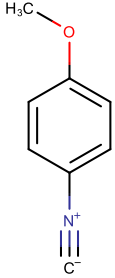   |
| 3{42} |    |
| 3{43} |  |
| 3{44} |  |

|       |                                                                                       |
|-------|---------------------------------------------------------------------------------------|
| 3{45} | 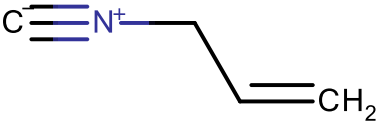   |
| 3{46} |    |
| 3{47} |  |
| 3{48} |  |

|              |                                                                                     |
|--------------|-------------------------------------------------------------------------------------|
| <b>3{49}</b> | 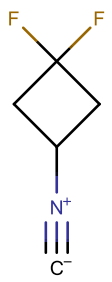   |
| <b>3{50}</b> |    |
| <b>3{51}</b> |  |
| <b>3{52}</b> |  |

|              |                                                                                       |
|--------------|---------------------------------------------------------------------------------------|
| <b>3{53}</b> | 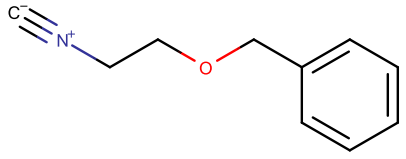   |
| <b>3{54}</b> |    |
| <b>3{55}</b> |  |
| <b>3{56}</b> |  |



|       |                                                                                     |
|-------|-------------------------------------------------------------------------------------|
| 3{57} | 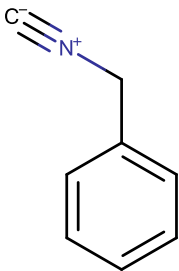   |
| 3{58} |    |
| 3{59} |  |
| 3{60} |  |

|       |                                                                                       |
|-------|---------------------------------------------------------------------------------------|
| 3{61} | 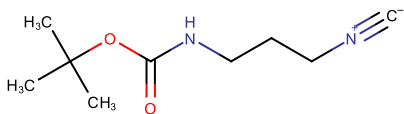   |
| 3{62} |    |
| 3{63} |  |
| 3{64} |  |

|              |                                                                                     |
|--------------|-------------------------------------------------------------------------------------|
| <b>3{65}</b> | 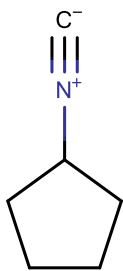   |
| <b>3{66}</b> |    |
| <b>3{67}</b> |  |
| <b>3{68}</b> |  |

|              |                                                                                       |
|--------------|---------------------------------------------------------------------------------------|
| <b>3{69}</b> | 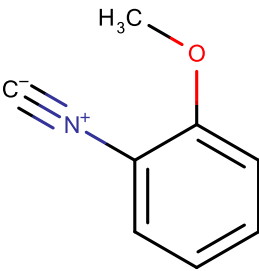   |
| <b>3{70}</b> |    |
| <b>3{71}</b> |  |
| <b>3{72}</b> |  |

|       |                                                                                     |
|-------|-------------------------------------------------------------------------------------|
| 3{73} | 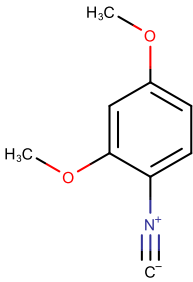   |
| 3{74} |    |
| 3{75} |  |
| 3{76} |  |

|       |                                                                                     |
|-------|-------------------------------------------------------------------------------------|
| 3{77} | 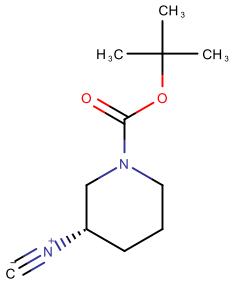 |
| 3{78} |  |
