# Supplementary material for: Generation of multimillion chemical space based on the parallel Groebke–Blackburn–Bienaymé reaction
Source: publisher site journal article supplement (doi:10.3762/bjoc.20.143), 2024-07-16
Supplement: Additional file 2 [file 1860-5397-20-143-S2.pdf]

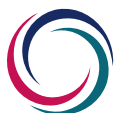

## Supporting Information

for

### Generation of multimillion chemical space based on the parallel Groebke–Blackburn–Bienaymé reaction

Evgen V. Govor, Vasyl Naumchyk, Ihor Nestorak, Dmytro S. Radchenko, Dmytro Dudenko, Yurii S. Moroz, Olexiy D. Kachkovsky and Oleksandr O. Grygorenko

*Beilstein J. Org. Chem.* **2024**, *20*, 1604–1613. [doi:10.3762/bjoc.20.143](https://doi.org/10.3762/bjoc.20.143)

### Parallel synthesis of compound library 4

| #                                                         | ID         | Structure                                                                                                   | Internal ID | Amine 1 |                                    | Aldehyde 2 |                       | Isonitrile 3 |                            | Yield |    |
|-----------------------------------------------------------|------------|-------------------------------------------------------------------------------------------------------------|-------------|---------|------------------------------------|------------|-----------------------|--------------|----------------------------|-------|----|
|                                                           |            |                                                                                                             |             | ID      | SMILES                             | ID         | SMILES                | ID           | SMILES                     | mg    | %  |
| <i>Preliminary test experiments, TsOH as the catalyst</i> |            |                                                                                                             |             |         |                                    |            |                       |              |                            |       |    |
| 1                                                         | 4{28,7,4}  | CN1N=NC(CNC2=C(N=C3C=C(C=CN23)C2=NOC=N2)C2=CC(CO)=CC(C)=N2)=N1<br> c:2,11,13,21,28,31,33,t:7,9,18,24        | Z8786958949 | 1{28}   | Cl.Nc1cc(ccn1)c2ncon2              | 2{7}       | Cc1cc(CO)cc(C=O)n1    | 3{4}         | Cn1nnc(C[N+][C-])n1        | 94.4  | 84 |
| 2                                                         | 4{29,8,5}  | COCCCN1=C(N=C2C=CC(OC3CN(C3)C(=O)OC(C)(C)C)=CN12)C1=CON=C1COC<br> c:10,25,33,t:6,8,30                       | Z8801681836 | 1{29}   | CC(C)(C)OC(=O)N1C(C(C1)O)c2cc(N)n2 | 2{8}       | COCCnocc1C=O          | 3{5}         | COCC[N+][C-]               | 94.8  | 72 |
| 3                                                         | 4{30,9,6}  | CCOC(=O)CCCN1=C(N=C2C=CC=C(N12)C1=CC=C(C)C=C1)C1=CSC=C1<br> c:13,15,25,31,t:9,11,20,22,28                   | Z8784060473 | 1{30}   | Cc1ccc(cc1)c2cccc(N)n2             | 2{9}       | O=Cc1ccsc1            | 3{6}         | CCOC(=O)CC[N+][C-]         | 79.9  | 71 |
| 4                                                         | 4{31,10,6} | CCOC(=O)CCCN1=C(N=C2C=CC3=C(CCO3)N12)C1=NC=CC(C)=C1<br> c:13,26,29,t:9,11,15,24                             | Z8778277510 | 1{31}   | Nc1ccc2OCc2n1                      | 2{10}      | Cc1ccnc(C=O)c1        | 3{6}         | CCOC(=O)CC[N+][C-]         | 72.0  | 70 |
| 5                                                         | 4{32,11,7} | CP(C)(=O)C1=CC2=NC(=C(NC3CCOCC3)N2C=C1)C1=NN(CC(F)(F)F)C=C1<br> c:20,31,t:4,6,8,23                          | Z8803896935 | 1{32}   | CP(=O)(C)c1ccnc(N)c1               | 2{11}      | FC(F)(F)Cn1ccc(C=O)n1 | 3{7}         | [C-][N+]C1CCOCC1           | 82.4  | 69 |
| 6                                                         | 4{33,9,6}  | CCCSC1=CC=CC2=NC(=C(NCCCC(=O)OCC)N12)C1=CSC=C1<br> c:6,27,t:4,8,10,24                                       | Z8797783068 | 1{33}   | CCCSc1ccc(N)n1                     | 2{9}       | O=Cc1ccsc1            | 3{6}         | CCOC(=O)CC[N+][C-]         | 72.0  | 66 |
| 7                                                         | 4{32,12,7} | COCl=NC=C(C=C1)C1=C(NC2CCOCC2)N2C=CC(=CC2=N1)P(C)(C)=O<br> c:4,6,9,20,22,25,t:2                             | Z8798985026 | 1{32}   | CP(=O)(C)c1ccnc(N)c1               | 2{12}      | COc1ccc(C=O)n1        | 3{7}         | [C-][N+]C1CCOCC1           | 70.9  | 66 |
| 8                                                         | 4{34,13,8} | COC(=O)C(CC1=CC=CC=C1)NC1=C(N=C2C=C(C=CN12)C1=NNC(C)=N1)C1=C(C)NN=N1<br> c:8,10,18,20,29,32,36,t:6,14,16,25 | Z8801681814 | 1{34}   | Cc1nc(n[nH]1)c2ccnc(N)c2           | 2{13}      | Cc1[nH]nnc1C=O        | 3{8}         | COC(=O)C(Cc1cccc1)[N+][C-] | 80.1  | 65 |
| 9                                                         | 4{35,14,6} | CCOC(=O)CCCN1=C(N=C2C=CC(C)=CN12)C1=CC=C(C)C=C1<br> c:13,16,26,t:9,11,21,23                                 | Z8712546411 | 1{35}   | Cc1ccc(N)n1                        | 2{14}      | Cc1ccc(C=O)cc1        | 3{6}         | CCOC(=O)CC[N+][C-]         | 61.2  | 64 |
| 10                                                        | 4{36,15,9} | CNC1=C(N=C2C=CC(Br)=CN12)C1=CC=C(OC)C=C1<br> c:6,9,20,t:2,4,14,16                                           | Z8776690344 | 1{36}   | Nc1ccc(Br)n1                       | 2{15}      | COc1ccc(C=O)cc1       | 3{9}         | C[N+][C-]                  | 57.7  | 64 |

|    |             |                                                                                                 |             |       |                                |       |                               |       |                        |      |    |
|----|-------------|-------------------------------------------------------------------------------------------------|-------------|-------|--------------------------------|-------|-------------------------------|-------|------------------------|------|----|
| 11 | 4{37,16,10} | CN1N=CC(CNC(=O)OC(C)(C)C)=C1C1=C(NC2CCOC2)N2C(C=CC=C2C(F)F)=N1<br> c:2,13,16,27,29,34           | Z8810903040 | 1{37} | Cl.Nc1cccc(n1)C(F)F            | 2{16} | Cn1ncc(CNC(=O)OC(C)(C)C)c1C=O | 3{10} | [C-]#[N+]C1CCOC1       | 78.9 | 63 |
| 12 | 4{38,17,9}  | CCOC1=CN=C(N=C1)C1=C(NC)N2C=CC(=C2=N1)C#N  c:5,7,10,15,17,20,t:3                                | Z8810902991 | 1{38} | Nc1cc(C#N)ccn1                 | 2{17} | CCOc1ncc(C=O)nc1              | 3{9}  | C[N+]#[C-]             | 50.0 | 63 |
| 13 | 4{39,10,6}  | CCOC(=O)CCNC1=C(N=C2N1C=C(Br)C1=C2CCC1)C1=NC=CC(C)=C1<br> c:11,18,27,30,t:9,15,25               | Z8784060925 | 1{39} | Nc1ncc(Br)c2CCCc21             | 2{10} | Cc1ccnc(C=O)c1                | 3{6}  | CCOC(=O)C CC[N+]#[C-]  | 75.9 | 61 |
| 14 | 4{40,18,4}  | CN1N=NC(CNC2=C(N=C3C=C(C=C(C)N23)C(F)(F)F)C2=CN(CCO)N=C2)=N1<br> c:2,11,29,31,t:7,9,13,23       | Z8781341796 | 1{40} | Cc1cc(cc(N)n1)C(F)(F)F         | 2{18} | OCCn1cc(C=O)cn1               | 3{4}  | Cn1nnc(C[N+]#[C-])n1   | 69.7 | 61 |
| 15 | 4{41,19,11} | COC1=C(N(C)N=C1)C1=C(NCC2=CC(Br)=CC=C2)N2C=C(C)N=CC2=N1<br> c:6,9,16,18,25,28,t:2,13,22         | Z8781341780 | 1{41} | Cc1cnc(N)c n1                  | 2{19} | COc1enn(C)c1C=O               | 3{11} | Br1cccc(C[N+]#[C-])c1  | 70.3 | 61 |
| 16 | 4{42,20,7}  | CCN1C=C(N=N1)C1=C(NC2CCOCC2)N2C=C(SC)C=CC2=N1  c:3,5,8,23,26,t:19                               | Z8810902980 | 1{42} | CSc1ccc(N)nc1                  | 2{20} | CCn1cc(C=O)nn1                | 3{7}  | [C-]#[N+]C1CCOCC1      | 57.5 | 59 |
| 17 | 4{43,21,12} | CC(C)(C)OC(=O)N1CC2=C(C1)N1C(NCC3COC3)=C(N=C1C=C2)C1=CC2=NC=NN2C=C1  c:9,22,24,27,34,38,t:30,32 | Z8798985027 | 1{43} | CC(C)(C)OC(=O)N1Cc2ccc(N)nc2C1 | 2{21} | O=Cc1ccn2ncc2c1               | 3{12} | [C-]#[N+]CC1COC1       | 74.6 | 58 |
| 18 | 4{44,22,6}  | CCOC(=O)CCNC1=C(N=C2C=NC(CC)=CN12)C1=CC=CC=C1  c:13,17,24,26,t:9,11,22                          | Z8741907003 | 1{44} | CCc1cnc(N)cn1                  | 2{22} | O=Cc1cccc1                    | 3{6}  | CCOC(=O)C CC[N+]#[C-]  | 54.9 | 58 |
| 19 | 4{45,23,10} | FC1=CC2=NC(=C(NC3CCOC3)N2C=C1)C1=C2CCCCN2C(=N1)C(F)(F)F<br> c:16,19,27,t:1,3,5                  | Z8803896946 | 1{45} | Cl.Nc1cc(F)ccn1                | 2{23} | FC(F)(F)c1nc(C=O)c2CCCc12     | 3{10} | [C-]#[N+]C1CCOC1       | 62.9 | 57 |
| 20 | 4{46,18,13} | COC1=CC=C(CNC2=C(N=C3C=CC=CN23)C2=CN(CCO)N=C2)C=C1<br> c:12,14,25,28,t:2,4,8,10,19              | Z8810903006 | 1{46} | Nc1ccccn1                      | 2{18} | OCCn1cc(C=O)cn1               | 3{13} | COc1ccc(C[N+]#[C-])cc1 | 55.8 | 57 |
| 21 | 4{47,24,14} | COCCNC1=C(N=C2C=C(C=CN12)S(N)(=O)=O)C1=CC(=CC=C1)N(C)C<br> c:9,11,22,24,t:5,7,20                | Z8798985048 | 1{47} | Cl.Nc1cc(ccn1)S(=O)(=O)N       | 2{24} | CN(C)c1cccc(C=O)c1            | 3{14} | COCC[N+]#[C-]          | 59.6 | 57 |
| 22 | 4{48,25,15} | CCNC1=C(N=C2C=C(C=CN12)S(C)(=O)=O)C1=CN=C(N=C1)C1CCOCC1<br> c:7,9,20,22,t:3,5,18                | Z8781341798 | 1{48} | CS(=O)(=O)c1ccnc(N)c1          | 2{25} | O=Cc1cnc(n c1)C2CCOCC2        | 3{15} | CC[N+]#[C-]            | 61.4 | 57 |

|    |             |                                                                                             |             |       |                            |       |                             |       |                       |      |    |
|----|-------------|---------------------------------------------------------------------------------------------|-------------|-------|----------------------------|-------|-----------------------------|-------|-----------------------|------|----|
| 23 | 4{49,26,7}  | OCC1=CC=CC2=NC(CCC3=CC=CC=C3)=C(NC3CCOCC3)N12  c:4,13,15,t:2,6,11,17                        | Z8741906954 | 1{49} | Ne1cccc(CO)n1              | 2{26} | O=CCCc1cccc1                | 3{7}  | [C-]#[N+]C1CCOCC1     | 53.8 | 57 |
| 24 | 4{50,27,16} | CN1N=C(N=C1C)C1=C(NC2=C(C)C=CC=C2C)N2C(C=CC=C2P(C)(C)=O)=N1  c:2,4,8,11,14,16,22,24,30      | Z8781341789 | 1{50} | CP(=O)(C)c1cccc(N)n1       | 2{27} | Cc1nc(C=O)nn1C              | 3{16} | Cc1cccc(C)c1[N+]#[C-] | 62.5 | 57 |
| 25 | 4{51,22,17} | CC1=C(CI)C=CC2=NC(=C(NCC3CCOCC3)N12)C1=CC=CC=C1  c:1,4,24,26,t:6,8,22                       | Z8741907089 | 1{51} | Cc1nc(N)cc1Cl              | 2{22} | O=Cc1cccc1                  | 3{17} | [C-]#[N+]CC1CCOCC1    | 54.4 | 57 |
| 26 | 4{52,28,18} | CC(C)(C)NC1=C(N=C2C=CC(=CN12)C1(CC1)C(F)(F)F)C1=CN(N=C1)C1CCS(=O)(=O)C1  c:9,11,27,t:5,7,24 | Z8801681827 | 1{52} | Ne1ccc(en1)C2(CC2)C(F)(F)F | 2{28} | O=Cc1enn(c1)C2CCS(=O)(=O)C2 | 3{18} | CC(C)(C)[N+]#[C-]     | 73.6 | 57 |
| 27 | 4{53,14,17} | CC1=CC=C(C=C1)C1=C(NCC2CCOCC2)N2C=C(CO)C=CC2=N1  c:3,5,8,24,27,t:1,20                       | Z8776690320 | 1{53} | Ne1ccc(CO)en1              | 2{14} | Cc1ccc(C=O)cc1              | 3{17} | [C-]#[N+]CC1CCOCC1    | 53.7 | 57 |
| 28 | 4{36,22,17} | BrC1=CN2C(C=C1)=NC(=C2NCC1CCOCC1)C1=CC=CC=C1  c:5,7,9,23,25,t:1,21                          | Z8700285600 | 1{36} | Ne1ccc(Br)en1              | 2{22} | O=Cc1cccc1                  | 3{17} | [C-]#[N+]CC1CCOCC1    | 59.0 | 57 |
| 29 | 4{54,14,6}  | CCOC(=O)CCCN1=C(N=C2C=CC(=CN12)C(=O)N(C)C)C1=CC=C(C)C=C1  c:13,15,30,t:9,11,25,27           | Z8776690341 | 1{54} | Cl.CN(C)C(=O)c1ccc(N)nc1   | 2{14} | Cc1ccc(C=O)cc1              | 3{6}  | CCOC(=O)CC[N+]#[C-]   | 62.3 | 56 |
| 30 | 4{55,29,6}  | CCOC(=O)CCCN1=C(N=C2C=C(SC)C=CN12)C1=NN(CC)C=C1  c:17,27,t:9,11,13,22                       | Z8797781157 | 1{55} | CSc1ccnc(N)c1              | 2{29} | CCn1ccc(C=O)n1              | 3{6}  | CCOC(=O)CC[N+]#[C-]   | 58.7 | 56 |
| 31 | 4{56,9,14}  | COCCN1=C(N=C2C=CC(=CN12)C1=NN(C)C=C1)C1=CSC=C1  c:9,11,20,26,t:5,7,16,23                    | Z8780122427 | 1{56} | Cn1ccc(n1)c2ccc(N)nc2      | 2{9}  | O=Cc1ccsc1                  | 3{14} | COCC[N+]#[C-]         | 53.2 | 56 |
| 32 | 4{57,30,19} | CC(C)OC1=CN2C(C=N1)=NC(C1CCN(CC1)C(C)=O)=C2NCC1=CC=CS1  c:8,10,22,29,t:4,27                 | Z8786958905 | 1{57} | CC(C)Oe1cnc(N)en1          | 2{30} | CC(=O)N1CC(C1)C=O           | 3{19} | [C-]#[N+]Cc1cccs1     | 62.2 | 56 |
| 33 | 4{58,26,7}  | C(CC1=CC=CC=C1)C1=C(NC2CCOCC2)N2C=CC(OC3COC3)=CC2=N1  c:4,6,9,20,28,31,t:2                  | Z8776690336 | 1{58} | Ne1ccc(OC2COC2)ccn1        | 2{26} | O=CCCc1cccc1                | 3{7}  | [C-]#[N+]C1CCOCC1     | 59.1 | 56 |
| 34 | 4{59,14,17} | CC1=CC=C(C=C1)C1=C(NCC2CCOCC2)N2C=C(CN3CCOCC3)C=CC2=N1  c:3,5,8,30,33,t:1,20                | Z8776690335 | 1{59} | Ne1ccc(CN2CCOCC2)en1       | 2{14} | Cc1ccc(C=O)cc1              | 3{17} | [C-]#[N+]CC1CCOCC1    | 62.8 | 55 |
| 35 | 4{60,29,14} | CCN1C=CC(=N1)C1=C(NCCOC)N2C=C(OC)C=C(F)C2=N1  c:3,5,8,24,t:16,20                            | Z8780122035 | 1{60} | COe1enc(N)c(F)c1           | 2{29} | CCn1ccc(C=O)n1              | 3{14} | COCC[N+]#[C-]         | 49.7 | 55 |

|    |             |                                                                                            |             |       |                         |       |                                     |       |                               |      |    |
|----|-------------|--------------------------------------------------------------------------------------------|-------------|-------|-------------------------|-------|-------------------------------------|-------|-------------------------------|------|----|
| 36 | 4{38,15,14} | COCCNC1=C(N=C2C=C(C=CN12)C#N)C1=CC=C(OC)C=C1  c:9,11,24,t:5,7,18,20                        | Z8711876682 | 1{38} | Nc1cc(C#N)ccn1          | 2{15} | COc1ccc(C=O)cc1                     | 3{14} | COCC[N+]#[C-]                 | 48.1 | 55 |
| 37 | 4{61,26,7}  | CCC1=CC=CC2=NC(CCC3=CC=CC=C3)=C(NC3CCOCC3)N12  c:4,13,15,t:2,6,11,17                       | Z8776690325 | 1{61} | CCc1cccc(N)n1           | 2{26} | O=CCCc1ccc1                         | 3{7}  | [C-]#[N+]C1CCOCC1             | 52.1 | 55 |
| 38 | 4{62,31,20} | COC1=CC(C)=C(NC2=C(N=C3C=C(CO)C=C(N23)C2=CN=CN2)C=C1  c:16,23,27,t:2,5,8,10,12,21          | Z8810902966 | 1{62} | Nc1cc(CO)ccn1           | 2{31} | O=Cc1cnc[nH]1                       | 3{20} | COc1ccc([N+]#[C-])c(C)c1      | 52.1 | 55 |
| 39 | 4{63,32,10} | COC1=C(C)C=CN2C(NC3CCOC3)=C(N=C12)[C@@H]1C[C@H]1C1=CC=NN1C  &1:18,20,r,c:2,5,15,27,t:17,25 | Z8810903003 | 1{63} | COc1c(C)ccnc1N          | 2{32} | Cn1cccc1[C@@H]2C[C@H]2C=O  &1:6,8,r | 3{10} | [C-]#[N+]C1CCOC1              | 54.6 | 55 |
| 40 | 4{62,15,13} | COC1=CC=C(CNC2=C(N=C3C=C(CO)C=CN23)C2=CC=C(OC)C=C2)C=C1  c:16,27,30,t:2,4,8,10,12,21,23    | Z8776690332 | 1{62} | Nc1cc(CO)ccn1           | 2{15} | COc1ccc(C=O)cc1                     | 3{13} | COc1ccc(C[N+]#[C-])cc1        | 57.9 | 55 |
| 41 | 4{37,33,10} | CC(=O)N1CCCC(C1)C1=C(NC2CCOC2)N2C(C=CC=C2C(F)F)=N1  c:10,21,23,28                          | Z8810903046 | 1{37} | Cl.Nc1cccc(n1)C(F)F     | 2{33} | CC(=O)N1C CCC(C1)C=O                | 3{10} | [C-]#[N+]C1CCOC1              | 56.2 | 55 |
| 42 | 4{64,14,17} | CC1=CC=C(C=C1)C1=C(NCC2CCOCC2)N2C=C(C=CC2=N1)N1CCCS1(=O)=O  c:3,5,8,20,22,25,t:1           | Z8776690346 | 1{64} | Nc1ccc(n1)N2CCCS2(=O)=O | 2{14} | Cc1ccc(C=O)cc1                      | 3{17} | [C-]#[N+]CC1C COCC1           | 65.3 | 55 |
| 43 | 4{53,34,21} | CP(C)(=O)C1=CC=C(C=C1)C1=C(NCC2CC2)N2C=C(CO)C=CC2=N1  c:6,8,11,24,27,t:4,20                | Z8810902970 | 1{53} | Nc1ccc(CO)ccn1          | 2{34} | CP(=O)(C)c1ccc(C=O)cc1              | 3{21} | [C-]#[N+]CC1C C1              | 54.7 | 55 |
| 44 | 4{65,35,5}  | CCC1=CN=CC2=NC(=C(NCCCOC)N12)C1=NN(C)C(C)=C1C1  c:4,24,t:2,6,8,19                          | Z8801681825 | 1{65} | CCc1cnc(N)n1            | 2{35} | Cc1c(Cl)c(C=O)nn1C                  | 3{5}  | COCCC[N+]#[C-]                | 53.7 | 55 |
| 45 | 4{66,36,22} | COCCC1=CC2=NC(=C(NC3COC3)N2C=C1)C1=NC(C)=C(OC(F)F)C=C1  c:18,30,t:4,6,8,21,24              | Z8810902992 | 1{66} | COCCc1cnc(N)c1          | 2{36} | Cc1nc(C=O)ccc1OC(F)F                | 3{22} | [C-]#[N+]C1CO C1              | 59.8 | 55 |
| 46 | 4{67,15,9}  | CNC1=C(N=C2C=CC=C(C)N12)C1=CC=C(OC)C=C1  c:6,20,t:2,4,8,14,16                              | Z8776690314 | 1{67} | Cc1cnc(N)n1             | 2{15} | COc1ccc(C=O)cc1                     | 3{9}  | C[N+]#[C-]                    | 39.5 | 55 |
| 47 | 4{68,37,23} | COC(=O)CCC(NC1=C(N=C2C=C(C=CN12)C#C)C1=NC2=C(CCC2)C=C1)C(=O)OC  c:12,14,29,t:8,10,21,23    | Z8803896955 | 1{68} | Nc1cc(C#C)ccn1          | 2{37} | O=Cc1ccc2C CCc2n1                   | 3{23} | COC(=O)CC C([N+]#[C-])C(=O)OC | 63.6 | 54 |
| 48 | 4{69,33,24} | CNC(=O)C1=CC2=NC(C3CCCN(C3)C(C)=O)=C(NCC3=CC(OC)=CC=C3)N2C=C1  c:26,28,33,t:4,6,18,22      | Z8810903000 | 1{69} | CNC(=O)c1ccnc(N)c1      | 2{33} | CC(=O)N1C CCC(C1)C=O                | 3{24} | COc1cccc(C[N+]#[C-])c1        | 64.0 | 54 |

|    |             |                                                                                                     |             |       |                                              |       |                       |       |                                  |      |    |
|----|-------------|-----------------------------------------------------------------------------------------------------|-------------|-------|----------------------------------------------|-------|-----------------------|-------|----------------------------------|------|----|
| 49 | 4{70,38,25} | FCCNCN1=C(N=C2N1C=CN=C2C1CC1)C1=NC(=CC=C1)C#C  c:7,11,13,22,24,t:5,20                               | Z8781341774 | 1{70} | Nc1ncnc1<br>C2CC2                            | 2{38} | O=Cc1cccc(C#C)n1      | 3{25} | FCCC[N+]#[C-]                    | 49.2 | 54 |
| 50 | 4{71,14,17} | CC1=CC=C(C=C1)C1=C(NCC2CCOCC2)N2C=C(I)N=CC2=N1  c:3,5,8,23,26,t:1,20                                | Z8776690316 | 1{71} | Nc1nc(I)cn1                                  | 2{14} | Cc1ccc(C=O)cc1        | 3{17} | [C-]#[N+]CC1C<br>COCC1           | 65.4 | 54 |
| 51 | 4{36,7,9}   | CNC1=C(N=C2C=CC(Br)=CN12)C1=NC(C)=CC(CO)=C1  c:6,9,17,21,t:2,4,14                                   | Z8798985029 | 1{36} | Nc1ccc(Br)cn1                                | 2{7}  | Cc1cc(CO)cc(C=O)n1    | 3{9}  | C[N+]#[C-]                       | 50.7 | 54 |
| 52 | 4{72,39,12} | COC1=NC(Br)=CN2C(NCC3CCOC3)=C(N=C12)C1=COC=C1  c:5,16,25,t:2,18,22                                  | Z8798985022 | 1{72} | COc1nc(Br)cnc1N                              | 2{39} | O=Cc1ccoc1            | 3{12} | [C-]#[N+]CC1C<br>COC1            | 57.3 | 54 |
| 53 | 4{73,15,13} | COC1=CC=C(CNC2=C(N=C3C=CC4=NC=C4N23)C2=CC=C(OC)C=C2)C=C1  c:12,16,29,32,t:2,4,8,10,14,23,25         | Z8741907043 | 1{73} | Nc1ccc2nccn2n1                               | 2{15} | COc1ccc(C=O)cc1       | 3{13} | COc1ccc(C[N+]#[C-])cc1           | 58.2 | 54 |
| 54 | 4{74,40,17} | OCC1=CSC(=N1)C1=C(NCC2CCOCC2)N2C(C=CC=C2OC(F)F)=N1  c:5,8,21,23,29,t:2                              | Z8797782835 | 1{74} | Nc1cccc(O<br>C(F)F)n1                        | 2{40} | OCc1csc(C=O)n1        | 3{17} | [C-]#[N+]CC1C<br>COCC1           | 59.8 | 54 |
| 55 | 4{75,41,7}  | CC(C)(C)OC(=O)N1CCN(CC1)C1=CC=CN2C(NC3CCOCC3)=C(N=C12)C1=NC=CC=C1  c:16,27,35,37,t:14,29,33         | Z8797783886 | 1{75} | CC(C)(C)O<br>C(=O)N1C<br>CN(CC1)c2<br>ccnc2N | 2{41} | O=Cc1ccccn1           | 3{7}  | [C-]#[N+]C1CC<br>OCC1            | 69.4 | 54 |
| 56 | 4{76,42,23} | COC(=O)CCC(NC1=C(N=C2C=CC(C)=C(Cl)N12)C1=CN(C)N=C1Cl)C(=O)OC  c:12,25,t:8,10,15,21                  | Z8810903037 | 1{76} | Cc1ccc(N)nc1Cl                               | 2{42} | Cn1cc(C=O)c(Cl)n1     | 3{23} | COC(=O)CC<br>C([N+]#[C-])C(=O)OC | 65.5 | 53 |
| 57 | 4{35,22,20} | COC1=CC(C)=C(NC2=C(N=C3C=CC(C)=CN23)C2=CC=CC=C2)C=C1  c:12,15,22,24,27,t:2,5,8,10,20                | Z8712568084 | 1{35} | Cc1ccc(N)nc1                                 | 2{22} | O=Cc1cccc1            | 3{20} | COc1ccc([N+]#[C-])c(C)c1         | 49.4 | 53 |
| 58 | 4{77,41,26} | FC1=CC=C(CNC2=C(N=C3C=CC(=CN23)C2=CN=CC=C2)C2=NC=CC=C2)C=C1  c:11,13,20,22,27,29,32,t:1,3,7,9,18,25 | Z8778278038 | 1{77} | Nc1ccc(en1)c2cccnc2                          | 2{41} | O=Cc1ccccn1           | 3{26} | Fc1ccc(C[N+]#[C-])cc1            | 56.9 | 53 |
| 59 | 4{42,9,27}  | CCCCN1=C(N=C2C=CC(SC)=CN12)C1=CS<br>C=C1  c:9,13,21,t:5,7,18                                        | Z8784058856 | 1{42} | CSc1ccc(N)nc1                                | 2{9}  | O=Cc1ccsc1            | 3{27} | CCCC[N+]#[C-]                    | 45.6 | 53 |
| 60 | 4{78,43,28} | CCCNC1=C(N=C2C=C(C)C3=NC(C)=CN3N12)C1=CN=C(C=C1)N1CCCCC1  c:14,23,25,t:4,6,8,11,21                  | Z8801681820 | 1{78} | Cc1cn2nc(N)cc(C)c2n1                         | 2{43} | O=Cc1ccc(nc1)N2CCCCC2 | 3{28} | CCC[N+]#[C-]                     | 57.9 | 53 |
| 61 | 4{79,22,27} | CCCCN1=C(N=C2C=NC=C(C)N12)C1=CC=CC=C1  c:9,19,21,t:5,7,11,17                                        | Z8711872692 | 1{79} | Cc1nccc(N)n1                                 | 2{22} | O=Cc1cccc1            | 3{27} | CCCC[N+]#[C-]                    | 40.0 | 53 |

|    |             |                                                                                      |             |       |                          |       |                                    |       |                      |      |    |
|----|-------------|--------------------------------------------------------------------------------------|-------------|-------|--------------------------|-------|------------------------------------|-------|----------------------|------|----|
| 62 | 4{80,22,7}  | COC1=NC=CN2C(NC3CCOCC3)=C(N=C12)C1=CC=CC=C1  c:4,15,23,25,t:2,17,21                  | Z8778277285 | 1{80} | COe1ncnc1N               | 2{22} | O=Cc1cccc1                         | 3{7}  | [C-]#[N+]C1CCOCC1    | 46.3 | 53 |
| 63 | 4{81,14,27} | CCCCNC1=C(N=C2C=NC=CN12)C1=CC=C(C)C=C1  c:9,11,21,t:5,7,16,18                        | Z8700285862 | 1{81} | Nc1cncn1                 | 2{14} | Cc1ccc(C=O)cc1                     | 3{27} | CCCC[N+]#[C-]        | 40.0 | 53 |
| 64 | 4{82,44,7}  | CCN1C=C(C=N1)C1=C(NC2CCOCC2)N2C(C=CC3=C2CCCC3)=N1  c:3,5,8,20,22,29                  | Z8778277692 | 1{82} | Nc1ccc2CCcC2n1           | 2{44} | CCn1cc(C=O)cn1                     | 3{7}  | [C-]#[N+]C1CCOCC1    | 52.1 | 53 |
| 65 | 4{83,45,18} | COC1=C(F)C=CC(=C1)C1=C(NC(C)(C)C)N2C=C(C=CC2=N1)P(C)(C)=O  c:2,5,7,10,18,20,23       | Z8810903025 | 1{83} | CP(=O)(C)c1ccc(N)nc1     | 2{45} | COc1cc(C=O)ccc1F                   | 3{18} | CC(C)(C)[N+]#[C-]    | 55.5 | 53 |
| 66 | 4{84,46,7}  | COCCCCC1=C(NC2CCOCC2)N2C=CN=C(C(C)C)C2=N1  c:7,18,26,t:20                            | Z8786958868 | 1{84} | CC(C)c1cncnc1N           | 2{46} | COCCCCC=O                          | 3{7}  | [C-]#[N+]C1CCOCC1    | 51.3 | 53 |
| 67 | 4{61,47,29} | CCOC(=O)CCNC1=C(CCOCC=C)N=C2C=C(C=C(CC)N12)  c:8,18,t:16,20                          | Z8808559858 | 1{61} | CCc1cccc(N)n1            | 2{47} | C=CCOCCC=O                         | 3{29} | CCOC(=O)C[C[N+]#[C-] | 49.1 | 53 |
| 68 | 4{85,48,30} | CN1C=C(CNC2=C(N=C3C=C(C=C(C)N23)C#N)C2=CNC(=N2)C2CCC2)C=N1  c:10,23,31,t:2,6,8,12,20 | Z8781341795 | 1{85} | Cc1cc(C#N)cc(N)n1        | 2{48} | O=Cc1c[nH]c(n1)C2CCC2              | 3{30} | Cn1cc(C[N+]#[C-])cn1 | 54.7 | 52 |
| 69 | 4{47,49,6}  | CCOC(=O)CCNC1=C(N=C2C=C(C=CN12)S(N)(=O)=O)C1=CN=C1C  c:13,15,27,t:9,11,24            | Z8801681821 | 1{47} | Cl.Nc1cc(ccn1)S(=O)(=O)N | 2{49} | Cc1n[nH]cc1C=O                     | 3{6}  | CCOC(=O)C[C[N+]#[C-] | 57.4 | 52 |
| 70 | 4{86,50,31} | CSCCNC1=C(N=C2C=C(C(F)F)C(Cl)=CN12)[C@@H]1C[C@H]1C1OCCO1  &1:18,20,r,c:15,t:5,7,9    | Z8801681826 | 1{86} | Nc1cc(C(F)F)c(Cl)cn1     | 2{50} | O=C[C@@H]1C[C@H]1C2OCCO2  &1:2,4,r | 3{31} | CSCC[N+]#[C-]        | 57.0 | 52 |
| 71 | 4{87,26,7}  | CC1=CC2=NC(CCC3=CC=CC=C3)=C(NC3COCC3)N2C=C1Cl  c:10,12,26,t:1,3,8,14                 | Z8776690323 | 1{87} | Cc1cc(N)nc1Cl            | 2{26} | O=CCCc1ccccc1                      | 3{7}  | [C-]#[N+]C1CCOCC1    | 52.1 | 52 |
| 72 | 4{88,29,7}  | CCN1C=CC(=N1)C1=C(NC2CCOCC2)N2C=CC(Br)=C(F)C2=N1  c:3,5,8,19,26,t:22                 | Z8797786849 | 1{88} | Nc1nccc(Br)c1F           | 2{29} | CCn1ccc(C=O)n1                     | 3{7}  | [C-]#[N+]C1CCOCC1    | 57.5 | 52 |
| 73 | 4{89,51,1}  | CC1=C(C=NN1C1CCC1)C1=C(NC2CC2)N2C(C=CC3=C2NN=C3)=N1  c:3,12,21,23,27,29,t:1          | Z8801681839 | 1{89} | Nc1ccc2cn[nH]c2n1        | 2{51} | Cc1c(C=O)cn1C2CCC2                 | 3{1}  | [C-]#[N+]C1CC1       | 48.9 | 52 |

|    |              |                                                                                                   |             |        |                       |       |                         |       |                               |      |    |
|----|--------------|---------------------------------------------------------------------------------------------------|-------------|--------|-----------------------|-------|-------------------------|-------|-------------------------------|------|----|
| 74 | 4{90,52,15}  | CCNC1=C(N=C2C=C(C=CN12)N1C=CC=N1)C1=CN(N=C1)C1CCC1<br> c:7,9,15,17,23,t:3,5,20                    | Z8781341788 | 1{90}  | Nc1cc(cen1)n2cccn2    | 2{52} | O=Cc1enn(c1)C2CCC2      | 3{15} | CC[N+]#[C-]                   | 48.8 | 52 |
| 75 | 4{91,53,18}  | CC1=NC(C2=C(NC(C)(C)C)N3C=C(C=CC3=N2)C(N)=O)=C(F)C=C1<br> c:4,12,14,17,25,t:1,22                  | Z8798985039 | 1{91}  | NC(=O)c1ccc(N)nc1     | 2{53} | Cc1ccc(F)c(C=O)n1       | 3{18} | CC(C)(C)[N+]#[C-]             | 48.0 | 52 |
| 76 | 4{92,54,32}  | COC1=C(C=CS1)C1=C(NC2CCC2)N2C=CC(=CC2=N1)C(N)=O  c:4,8,17,19,22,t:2                               | Z8808559893 | 1{92}  | NC(=O)c1ccc(N)c1      | 2{54} | COc1secc1C=O            | 3{32} | [C-]#[N+]C1CC C1              | 48.0 | 52 |
| 77 | 4{92,41,17}  | NC(=O)C1=CC2=NC(=C(NCC3CCOCC3)N2C=C1)C1=NC=CC=C1  c:20,25,27,t:3,5,7,23                           | Z8784059425 | 1{92}  | NC(=O)c1ccc(N)c1      | 2{41} | O=Cc1ccccn1             | 3{17} | [C-]#[N+]CC1C COCC1           | 49.1 | 52 |
| 78 | 4{93,55,33}  | COC1=CN2C(C=N1)=NC(=C2NCC1=C(OC)C=CC=C1)C1=CC(=NC=C1)P(C)(C)=O<br> c:6,8,10,15,19,21,26,28,t:2,24 | Z8798985018 | 1{93}  | COc1cnc(N)c1          | 2{55} | CP(=O)(C)c1ccc(C=O)ccn1 | 3{33} | COc1cccc1C[N+]#[C-]           | 61.2 | 52 |
| 79 | 4{94,14,17}  | CC1=CC=C(C=C1)C1=C(NCC2CCOCC2)N2N=C(F)C=CC2=N1  c:3,5,8,23,26,t:1,20                              | Z8776690309 | 1{94}  | Nc1ccc(F)n1           | 2{14} | Cc1ccc(C=O)cc1          | 3{17} | [C-]#[N+]CC1C COCC1           | 47.4 | 52 |
| 80 | 4{76,56,23}  | COC(=O)CCC(NC1=C(N=C2C=CC(C)=C(C1)N12)C1=C(C)C=NC(F)=C1)C(=O)OC<br> c:12,21,24,27,t:8,10,15       | Z8810903005 | 1{76}  | Cc1ccc(N)nc1Cl        | 2{56} | Cc1cnc(F)cc1C=O         | 3{23} | COC(=O)CC C([N+]#[C-])C(=O)OC | 62.5 | 52 |
| 81 | 4{95,46,25}  | COCCCCC1=C(NCCCF)N2C=C(C=CC2=N1)C(F)F  c:7,15,17,20                                               | Z8781341784 | 1{95}  | Nc1ccc(en1)C(F)F      | 2{46} | COCCCCC=O               | 3{25} | FCCC[N+]#[C-]                 | 47.8 | 52 |
| 82 | 4{96,14,17}  | COCCN(C)CC1=CC2=NC(=C(NCC3CCOCC3)N2C=C1)C1=CC=C(C)C=C1<br> c:24,32,t:7,9,11,27,29                 | Z8776690343 | 1{96}  | COCCN(C)Cc1cnc(N)c1   | 2{14} | Cc1ccc(C=O)cc1          | 3{17} | [C-]#[N+]CC1C COCC1           | 58.6 | 51 |
| 83 | 4{97,57,10}  | CC1=CC(F)=CN2C(NC3CCOC3)=C(N=C12)C1CCOC1  c:4,14,t:1,16                                           | Z8798985034 | 1{97}  | Cc1cc(F)cn1           | 2{57} | O=CC1CCO C1             | 3{10} | [C-]#[N+]C1CC OC1             | 42.2 | 51 |
| 84 | 4{98,58,27}  | CCCCNC1=C(N=C2C=CC=C(OC(F)(F)F)N12)C1=NSN=C1  c:9,24,t:5,7,11,21                                  | Z8797783281 | 1{98}  | Nc1cccc(O C(F)(F)F)n1 | 2{58} | O=Cc1ensn1              | 3{27} | CCCC[N+]#[C-]                 | 49.3 | 51 |
| 85 | 4{99,59,34}  | COC1=C(Br)C=C(C=N1)C1=C(NCC2CCCO2)N2C=C(C=CC2=N1)S(N)(=O)=O<br> c:2,5,7,10,21,23,26               | Z8808559882 | 1{99}  | Nc1ccc(en1)S(=O)(=O)N | 2{59} | COc1ncc(C=O)cc1Br       | 3{34} | [C-]#[N+]CC1C CCO1            | 66.6 | 51 |
| 86 | 4{100,29,14} | CCN1C=CC(=N1)C1=C(NCCOC)N2C(C=NC3=C2C=CC=C3)=N1  c:3,5,8,17,19,22,24,26                           | Z8778277663 | 1{100} | Nc1enc2ccc cc2n1      | 2{29} | CCn1ccc(C=O)n1          | 3{14} | COCC[N+]#[C-]                 | 46.3 | 51 |



|    |              |                                                                                                            |             |        |                      |       |                                   |       |                                                   |      |    |
|----|--------------|------------------------------------------------------------------------------------------------------------|-------------|--------|----------------------|-------|-----------------------------------|-------|---------------------------------------------------|------|----|
| 87 | 4{95,60,35}  | CSCCCNC1=C(N=C2C=CC(=CN12)C(F)F)C(C)C1CCOC1  c:10,12,t:6,8                                                 | Z8810903012 | 1{95}  | Nc1ccc(en1)C(F)F     | 2{60} | CC(C=O)C1CCOC1                    | 3{35} | CSCCC[N+]#[C-]                                    | 50.5 | 51 |
| 88 | 4{70,61,32}  | CS(=O)C1=CC=C(C=C1)C1=C(NC2CCC2)N2C=CN=C(C3CC3)C2=N1  c:5,7,10,19,28,t:3,21                                | Z8810903026 | 1{70}  | Nc1ncnc1C2CC2        | 2{61} | CS(=O)c1ccc(C=O)cc1               | 3{32} | [C-]#[N+]C1CC1                                    | 49.9 | 50 |
| 89 | 4{81,14,17}  | CC1=CC=C(C=C1)C1=C(NCC2CCOCC2)N2C=CN=CC2=N1  c:3,5,8,20,22,25,t:1                                          | Z8781341793 | 1{81}  | Nc1cncn1             | 2{14} | Cc1ccc(C=O)cc1                    | 3{17} | [C-]#[N+]CC1C1COCC1                               | 43.8 | 50 |
| 90 | 4{92,31,36}  | COC(=O)[C@@H]1CC(CN1C(=O)OC(C)(C)C)NC1=C(N=C2C=C(C=CN12)C(N)=O)C1=CN=CN1  c:22,24,34,t:18,20,32            | Z8798985053 | 1{92}  | NC(=O)c1cnc(N)c1     | 2{31} | O=Cc1cnc[nH]1                     | 3{36} | COC(=O)[C@@H]1C[C@@H](CN1C(=O)OC(C)(C)C)[N+]#[C-] | 63.7 | 50 |
| 91 | 4{46,15,9}   | CNC1=C(N=C2C=CC=CN12)C1=CC=C(OC)C=C1  c:6,8,19,t:2,4,13,15                                                 | Z8776690321 | 1{46}  | Nc1cccen1            | 2{15} | COc1ccc(C=O)cc1                   | 3{9}  | C[N+]#[C-]                                        | 34.4 | 50 |
| 92 | 4{101,62,14} | COCCNC1=C(N=C2N1C=C(CO)C=C2C1)C1C11CCOCC1  c:7,15,t:5,11                                                   | Z8810902961 | 1{101} | Nc1ncc(CO)cc1Cl      | 2{62} | O=CC1CC21CCOCC2                   | 3{14} | COCC[N+]#[C-]                                     | 49.6 | 50 |
| 93 | 4{102,63,37} | COCN1N=CC=C1C1=C(NC2CC(C2)C(=O)OC)N2C=CC(=CC2=N1)C(=O)N(C)C  c:4,6,9,22,24,27                              | Z8781341782 | 1{102} | CN(C)C(=O)c1cnc(N)c1 | 2{63} | COCn1ccc1C=O                      | 3{37} | COC(=O)C1CC(C1)[N+]#[C-]                          | 57.8 | 50 |
| 94 | 4{46,22,14}  | COCCNC1=C(N=C2C=CC=CN12)C1=CC=C(C=C1)  c:9,11,18,20,t:5,7,16                                               | Z8711876379 | 1{46}  | Nc1cccen1            | 2{22} | O=Cc1cccc1                        | 3{14} | COCC[N+]#[C-]                                     | 36.2 | 50 |
| 95 | 4{50,64,26}  | CP(C)(=O)C1=CC=CC2=NC(=C(NCC3=CC=C(F)C=C3)N12)C1=CC=C(C=C1)N1C=CN=C1  c:6,19,27,29,33,35,t:4,8,10,14,16,25 | Z8810902997 | 1{50}  | CP(=O)(C)c1cccc(N)n1 | 2{64} | O=Cc1ccc(cc1)n2ccnc2              | 3{26} | Fe1ccc(C[N+]#[C-])cc1                             | 62.0 | 50 |
| 96 | 4{103,65,38} | CC(C)(C)OC(=O)NC1CC2(C1)CC(C2)C1=C(NC2=CC3=C(OCO3)C=C2)N2C(C=NC=C2CO)=N1  c:17,28,33,35,39,t:20,22         | Z8803896970 | 1{103} | Nc1cnc(CO)n1         | 2{65} | CC(C)(C)OC(=O)NC1CC2(C1)CC(C2)C=O | 3{38} | [C-]#[N+]c1ccc2OCOc2c1                            | 66.4 | 50 |
| 97 | 4{104,66,39} | CCOCCNC1=C(N=C2C=CC3=C(COCC3)N12)C1=C(C)N(CC)N=C1C  c:10,22,28,t:6,8,12                                    | Z8810903028 | 1{104} | Nc1ccc2CCOCc2n1      | 2{66} | CCn1nc(C)c(C=O)c1C                | 3{39} | CCOCC[N+]#[C-]                                    | 51.6 | 50 |
| 98 | 4{103,67,40} | CCOC(=O)C1=CC=C(NC2=C(N=C3C=NC=C(CO)N23)C2CCCSC2)C=C1  c:14,30,t:5,7,10,12,16                              | Z8798985062 | 1{103} | Nc1cnc(CO)n1         | 2{67} | O=CC1CCCSC1                       | 3{40} | CCOC(=O)c1ccc([N+]#[C-])cc1                       | 55.5 | 50 |

|     |              |                                                                                                                              |             |        |                                  |       |                                                      |       |                            |      |    |
|-----|--------------|------------------------------------------------------------------------------------------------------------------------------|-------------|--------|----------------------------------|-------|------------------------------------------------------|-------|----------------------------|------|----|
| 99  | 4{105,68,41} | COC1=CC=C(NC2=C(N=C3C=CC=C(N23)C(N)=O)C2=NC=C(S2)C(C)O)C=C1<br> c:11,13,23,30,t:2,4,7,9,21                                   | Z8810902972 | 1{105} | NC(=O)c1c<br>ccc(N)n1            | 2{68} | CC(O)c1enc(<br>C=O)s1                                | 3{41} | COc1ccc([N<br>+]#[C-])cc1  | 54.5 | 49 |
| 100 | 4{36,40,13}  | COC1=CC=C(CNC2=C(N=C3C=CC(Br)=CN2<br>3)C2=NC(CO)=CS2)C=C1<br> c:12,15,24,28,t:2,4,8,10,20                                    | Z8808559864 | 1{36}  | Nc1ccc(Br)<br>cn1                | 2{40} | OCc1esc(C=<br>O)n1                                   | 3{13} | COc1ccc(C[<br>N+]#[C-])cc1 | 59.3 | 49 |
| 101 | 4{47,69,6}   | CCOC(=O)CCNC1=C(N=C2C=C(C=CN12)S<br>(N)(=O)=O)C1=NN(C)C(C)=C1<br> c:13,15,29,t:9,11,24                                       | Z8808559899 | 1{47}  | Cl.Nc1cc(cc<br>n1)S(=O)(=<br>O)N | 2{69} | Cc1cc(C=O)<br>mn1C                                   | 3{6}  | CCOC(=O)C<br>CC[N+]#[C-]   | 55.9 | 49 |
| 102 | 4{45,70,12}  | CC(F)(F)C1=NC(=CS1)C1=C(NCC2CCOC2)<br>N2C=CC(F)=CC2=N1  c:6,10,21,24,27,t:4                                                  | Z8801681810 | 1{45}  | Cl.Nc1cc(F)<br>ccn1              | 2{70} | CC(F)(F)c1n<br>c(C=O)cs1                             | 3{12} | [C-<br>]#[N+]CC1C<br>COC1  | 50.8 | 49 |
| 103 | 4{106,15,13} | COC1=CC=C(CNC2=C(N=C3C=CC(OC)=NN<br>23)C2=CC=C(OC)C=C2)C=C1<br> c:12,16,27,30,t:2,4,8,10,21,23                               | Z8776690338 | 1{106} | COc1ccc(N)<br>nn1                | 2{15} | COc1ccc(C=<br>O)cc1                                  | 3{13} | COc1ccc(C[<br>N+]#[C-])cc1 | 51.9 | 49 |
| 104 | 4{59,71,42}  | CN1C=C(C=N1)[C@@H]1OCC[C@H]1C1=C<br>(NC2=C(C)C=CC=C2)N2C=C(CN3CCOCC3)<br>C=CC2=N1<br> &1:6,10,r;c:2,4,13,16,19,21,35,38,t:25 | Z8810903017 | 1{59}  | Nc1ccc(CN<br>2CCOCC2)<br>cn1     | 2{71} | Cn1cc(cn1)[<br>C@@H]2OC<br>C[C@H]2C=<br>O  &1:6,10,r | 3{42} | Cc1ccccc1[N<br>+]#[C-]     | 62.6 | 49 |
| 105 | 4{104,72,39} | CCOCCNC1=C(C[C@@H](C)NC(=O)OCC2=<br>CC=CC=C2)N=C2C=CC3=C(COCC3)N12<br> c:6,18,20,25,t:16,23,27                               | Z8808559855 | 1{104} | Nc1ccc2CC<br>OCc2n1              | 2{72} | C[C@H](CC<br>=O)NC(=O)<br>OCc1ccccc1                 | 3{39} | CCOCC[N+]<br>#[C-]         | 59.9 | 49 |
| 106 | 4{107,16,10} | CN1N=CC(CNC(=O)OC(C)(C)C)=C1C1=C(N<br>C2CCOC2)N2C=C(OCCO)C=CC2=N1<br> c:2,13,16,32,35,t:26                                   | Z8808559898 | 1{107} | Nc1ccc(OC<br>CO)cn1              | 2{16} | Cn1ncc(CNC<br>(=O)OC(C)(<br>C)C)c1C=O                | 3{10} | [C-<br>]#[N+]C1CC<br>OC1   | 62.6 | 49 |
| 107 | 4{108,73,12} | CCCOC1=CN2C(NCC3CCOC3)=C(N=C2C=C<br>1)C1=C(C)C=NN1C  c:15,17,20,23,26,t:4                                                    | Z8810902969 | 1{108} | CCCOc1ccc<br>(N)nc1              | 2{73} | Cc1cnn(C)c1<br>C=O                                   | 3{12} | [C-<br>]#[N+]CC1C<br>COC1  | 48.8 | 49 |
| 108 | 4{109,74,41} | COC1=CC=C(NC2=C(N=C3C=CC=C(N23)S(<br>N)(=O)=O)C2=C(CI)N(C)C=N2)C=C1<br> c:11,13,22,27,30,t:2,4,7,9                           | Z8810902958 | 1{109} | Cl.Nc1cccc<br>(n1)S(=O)(=<br>O)N | 2{74} | Cn1enc(C=O<br>)c1Cl                                  | 3{41} | COc1ccc([N<br>+]#[C-])cc1  | 57.1 | 49 |
| 109 | 4{67,26,27}  | CCCCNC1=C(CCC2=CC=CC=C2)N=C2C=C<br>C=C(C)N12  c:5,11,13,18,t:9,16,20                                                         | Z8711876474 | 1{67}  | Cc1ccccc(N)<br>n1                | 2{26} | O=CCCc1cc<br>ccc1                                    | 3{27} | CCCC[N+]#[<br>C-]          | 40.6 | 49 |

|     |              |                                                                                                 |             |        |                       |       |                    |       |                                   |      |    |
|-----|--------------|-------------------------------------------------------------------------------------------------|-------------|--------|-----------------------|-------|--------------------|-------|-----------------------------------|------|----|
| 110 | 4{110,44,7}  | CCN1C=C(C=N1)C1=C(NC2CCOCC2)N2C=C(C(C)=CC2=N1)S(N)(=O)=O<br> c:3,5,8,19,22,25                   | Z8780122393 | 1{110} | Cc1cc(N)nc1S(=O)(=O)N | 2{44} | CCn1cc(C=O)cn1     | 3{7}  | [C-]#[N+]C1CCOCC1                 | 53.3 | 49 |
| 111 | 4{22,26,16}  | CC1=CC=CC(C)=C1NC1=C(CCC2=CC=CC=C2)N=C2C=CC(CI)=NN12<br> c:3,6,10,16,18,23,26,t:1,14,21         | Z8741907012 | 1{22}  | Nc1ccc(Cl)nn1         | 2{26} | O=CCCc1ccc1        | 3{16} | Cc1cccc(C)c1[N+]#[C-]             | 49.6 | 49 |
| 112 | 4{36,15,11}  | COC1=CC=C(C=C1)C1=C(NCC2=CC(Br)=C=C2)N2C=C(Br)C=CC2=N1<br> c:4,6,9,16,18,25,28,t:2,13,22        | Z8712552581 | 1{36}  | Nc1ccc(Br)cn1         | 2{15} | COc1ccc(C=O)cc1    | 3{11} | Br1cccc(C[N+]#[C-])c1             | 63.4 | 48 |
| 113 | 4{53,75,33}  | COCC1=CC=C(O1)C1=C(NCC2=C(OC)C=CC=C2)N2C=C(CO)C=CC2=N1<br> c:5,9,13,17,19,27,30,t:3,23          | Z8803896929 | 1{53}  | Nc1ccc(CO)cn1         | 2{75} | COc1ccc(C=O)o1     | 3{33} | COc1cccc1C[N+]#[C-]               | 51.2 | 48 |
| 114 | 4{50,76,26}  | CCC1=NN(C)C=C1)C1=C(NCC2=CC=C(F)C=C2)N2C(C=CC=C2P(C)(C)=O)=N1<br> c:6,9,18,23,25,31,t:2,13,15   | Z8803896928 | 1{50}  | CP(=O)(C)c1cccc(N)n1  | 2{76} | CCc1cc(C=O)n(C)n1  | 3{26} | Fc1ccc(C[N+]#[C-])cc1             | 55.3 | 48 |
| 115 | 4{111,18,43} | COC(=O)C1=CN2C(NC3CCN(CC3)C(=O)OC(C)(C)C)=C(N=C2C(C)=C1)C1=CN(CCO)N=C1<br> c:22,24,28,37,t:4,31 | Z8786958933 | 1{111} | COC(=O)c1cnc(N)c(C)c1 | 2{18} | OCCn1cc(C=O)cn1    | 3{43} | CC(C)(C)OC(=O)N1CCCC(C1)[N+]#[C-] | 64.7 | 48 |
| 116 | 4{112,77,10} | COC1=CN=CC2=NC(CC3CCCC3)=C(NC3CCOC3)N12<br> c:4,t:2,6,15                                        | Z8781341791 | 1{112} | COc1cnc(N)n1          | 2{77} | O=CCC1CC1          | 3{10} | [C-]#[N+]C1CCOC1                  | 40.6 | 48 |
| 117 | 4{113,78,14} | COCCNC1=C(N=C2N1C=CC=C2N1CCOCC1)C1COC(C)C1<br> c:7,11,13,t:5                                    | Z8810903019 | 1{113} | Nc1ncccc1N2CCOCC2     | 2{78} | CC1CC(CO1)C=O      | 3{14} | COCC[N+]#[C-]                     | 46.3 | 48 |
| 118 | 4{114,40,7}  | COCC1=CC2=NC(=C(NC3CCOCC3)N2C=C1)C1=NC(CO)=CS1<br> c:19,26,t:3,5,7,22                           | Z8786958883 | 1{114} | COc1ccnc(N)c1         | 2{40} | OCc1csc(C=O)n1     | 3{7}  | [C-]#[N+]C1CCOCC1                 | 48.0 | 48 |
| 119 | 4{46,7,9}    | CNC1=C(N=C2C=CC=CN12)C1=NC(C)=CC(CO)=C1<br> c:6,8,16,20,t:2,4,13                                | Z8803896924 | 1{46}  | Nc1cccnc1             | 2{7}  | Cc1cc(CO)cc(C=O)n1 | 3{9}  | C[N+]#[C-]                        | 34.4 | 47 |
| 120 | 4{62,15,27}  | CCCCNC1=C(N=C2C=C(CO)C=CN12)C1=C(C=C(OC)C=C1)<br> c:13,24,t:5,7,9,18,20                         | Z8741907001 | 1{62}  | Nc1cc(CO)cn1          | 2{15} | COc1ccc(C=O)cc1    | 3{27} | CCCC[N+]#[C-]                     | 41.5 | 47 |
| 121 | 4{44,79,13}  | CCC1=CN2C(NCC3=CC=C(OC)C=C3)=C(N=C2C=N1)C1=NC=CO1<br> c:14,16,18,21,26,t:2,8,10,24              | Z8803896965 | 1{44}  | CCc1cnc(N)cn1         | 2{79} | O=Cc1ncco1         | 3{13} | COc1ccc(C[N+]#[C-])cc1            | 44.4 | 47 |
| 122 | 4{115,26,26} | OCC1=CN2C(C=N1)=NC(CCC1=CC=CC=C1)=C2NCC1=CC=C(F)C=C1<br> c:6,8,15,17,19,29,t:2,13,24,26         | Z8776690347 | 1{115} | Nc1cnc(CO)cn1         | 2{26} | O=CCCc1ccc1        | 3{26} | Fc1ccc(C[N+]#[C-])cc1             | 47.8 | 47 |

|     |              |                                                                                                        |             |        |                             |       |                                |       |                               |      |    |
|-----|--------------|--------------------------------------------------------------------------------------------------------|-------------|--------|-----------------------------|-------|--------------------------------|-------|-------------------------------|------|----|
| 123 | 4{116,15,9}  | CNC1=C(N=C2C=CC(C)=C(C#N)N12)C1=CC=C(OC)C=C1  c:6,22,t:2,4,9,16,18                                     | Z8776690312 | 1{116} | Cc1ccc(N)nc1C#N             | 2{15} | COc1ccc(C=O)cc1                | 3{9}  | C[N+]#[C-]                    | 36.9 | 47 |
| 124 | 4{117,80,20} | COC1=CC(C)=C(NC2=C(N=C3C=CC=C(N23)C2(CCC2)C(F)(F)F)C2=NC=C(C)S2)C=C1  c:12,14,35,t:2,5,8,10,28,30      | Z8797785072 | 1{117} | Nc1cccc(n1)C2(CCC2)C(F)(F)F | 2{80} | Cc1cnc(C=O)s1                  | 3{20} | COc1ccc([N+]#[C-])c(C)c1      | 58.8 | 46 |
| 125 | 4{34,81,23}  | COC(=O)CCC(NC1=C(N=C2C=C(C=CN12)C1=NNC(C)=N1)C1=NC(=CC=C1)C(F)F)C(=O)OC  c:12,14,23,28,30,t:8,10,19,26 | Z8810902953 | 1{34}  | Cc1nc(n[nH]1)c2ccnc(N)c2    | 2{81} | FC(F)c1cccc(C=O)n1             | 3{23} | COC(=O)CC C([N+]#[C-])C(=O)OC | 62.1 | 46 |
| 126 | 4{118,82,32} | COC1=C(C=CC=C1F)C1=C(NC2CCC2)N2C(C=CC=C2C(C)O)=N1  c:4,6,10,20,22,27,t:2                               | Z8801681833 | 1{118} | Cl.CC(O)c1cccc(N)n1         | 2{82} | COc1c(F)ccc1C=O                | 3{32} | [C-]#[N+]C1CC C1              | 44.2 | 46 |
| 127 | 4{119,14,17} | CC1=CC=C(C=C1)C1=C(NCC2CCOCC2)N2C=C(C=CC2=N1)C#N  c:3,5,8,20,22,25,t:1                                 | Z8776690318 | 1{119} | Nc1ccc(C#N)cn1              | 2{14} | Cc1ccc(C=O)cc1                 | 3{17} | [C-]#[N+]CC1C COCC1           | 43.0 | 46 |
| 128 | 4{120,83,5}  | COCCCN1=C(N=C2C=C(C=CN12)C1=CN(C)N=C1)C1=CC(=CC=C1)S(N)(=O)=O  c:10,12,21,26,28,t:6,8,17,24            | Z8798985044 | 1{120} | Cn1cc(cn1)c2ccnc(N)c2       | 2{83} | NS(=O)(=O)c1cccc(C=O)c1        | 3{5}  | COCCC[N+]#[C-]                | 54.4 | 46 |
| 129 | 4{65,84,7}   | CCC1=CN=CC2=NC(CCSC)=C(NC3CCOCC3)N12  c:4,t:2,6,12                                                     | Z8778278039 | 1{65}  | CCc1cnc(N)n1                | 2{84} | CSCCC=O                        | 3{7}  | [C-]#[N+]C1CC OCC1            | 39.0 | 45 |
| 130 | 4{104,85,44} | CC(C)(C)OC(=O)NCCCCN1=C(N=C2C=CC3=C(COCC3)N12)C1=CN=NS1  c:17,31,t:13,15,19,29                         | Z8810903041 | 1{104} | Nc1ccc2CCOCc2n1             | 2{85} | O=Cc1cnns1                     | 3{44} | CC(C)(C)OC(=O)NCCCC [N+]#[C-] | 53.8 | 45 |
| 131 | 4{121,39,10} | BrC1=CC2=NC(C3=COC=C3)=C(NC3CCOC3)N2C=C1  c:9,22,t:1,3,6,11                                            | Z8808559862 | 1{121} | Nc1cc(Br)cn1                | 2{39} | O=Cc1ccoc1                     | 3{10} | [C-]#[N+]C1CC OC1             | 42.0 | 45 |
| 132 | 4{81,46,13}  | COCCCCC1=C(NCC2=CC=C(OC)C=C2)N2C=CN=CC2=N1  c:7,17,21,23,26,t:11,13                                    | Z8808559867 | 1{81}  | Nc1cncn1                    | 2{46} | COCCCCC=O                      | 3{13} | COc1ccc(C[N+]#[C-])cc1        | 42.4 | 44 |
| 133 | 4{122,10,7}  | CC(=O)NC1=CC=CN2C(NC3CCOCC3)=C(N=C12)C1=NC=CC(C)=C1  c:6,17,25,28,t:4,19,23                            | Z8784059625 | 1{122} | Cl.CC(=O)Nc1ccnc1N          | 2{10} | Cc1cnc(C=O)c1                  | 3{7}  | [C-]#[N+]C1CC OCC1            | 43.7 | 44 |
| 134 | 4{32,86,35}  | CSCCCN1=C(N=C2C=C(C=CN12)P(C)(C)=O)C1CCN(C(=O)OC(C)(C)C)C1(C)C  c:10,12,t:6,8                          | Z8803896948 | 1{32}  | CP(=O)(C)c1ccnc(N)c1        | 2{86} | CC(C)(C)OC(=O)N1CCC(C=O)C1(C)C | 3{35} | CSCCC[N+]#[C-]                | 59.1 | 44 |

|     |              |                                                                                                            |             |        |                          |       |                                           |       |                          |      |    |
|-----|--------------|------------------------------------------------------------------------------------------------------------|-------------|--------|--------------------------|-------|-------------------------------------------|-------|--------------------------|------|----|
| 135 | 4{123,87,22} | CC(C)(C)OC(=O)[C@@H]1C[C@H]1C1=C(NC2OC2)N2C=CC(OCCO)=CC2=N1  &1:7,9,r,c:11,20,26,29                        | Z8810903001 | 1{123} | Cl.Nc1cc(OCCO)ccn1       | 2{87} | CC(C)(C)OC(=O)[C@@H]1C[C@H]1C=O  &1:7,9,r | 3{22} | [C-]#[N+]C1CO C1         | 46.5 | 44 |
| 136 | 4{38,19,9}   | CNC1=C(N=C2C=C(C=CN12)C#N)C1=C(OC)C=NN1C  c:6,8,15,19,t:2,4                                                | Z8801681823 | 1{38}  | Nc1cc(C#N)ccn1           | 2{19} | COc1cnn(C)c1C=O                           | 3{9}  | C[N+]#[C-]               | 33.7 | 44 |
| 137 | 4{73,88,20}  | COC1=CC(C)=C(NC2=C(N=C3C=CC4=NC=CN4N23)C2=CC3=C(C=CC=N3)C=C2)C=C1  c:12,16,27,29,32,35,t:2,5,8,10,14,23,25 | Z8810903009 | 1{73}  | Nc1ccc2nccn2n1           | 2{88} | O=Cc1ccc2ccnc2c1                          | 3{20} | COc1ccc([N+]#[C-])c(C)c1 | 49.7 | 44 |
| 138 | 4{70,89,35}  | CCC1=NC=C(C=N1)C1=C(NCCCC)N2C=C(N=C(C3CC3)C2=N1  c:4,6,9,18,27,t:2,20                                      | Z8798985038 | 1{70}  | Nc1cncnc1C2CC2           | 2{89} | CCc1ncc(C=O)cn1                           | 3{35} | CSCCC[N+]#[C-]           | 43.3 | 43 |
| 139 | 4{109,90,41} | COC1=CC=C(NC2=C(N=C3C=CC=C(N23)S(N)(=O)=O)C2=COC(C)=N2)C=C1  c:11,13,26,29,t:2,4,7,9,22                    | Z8808559860 | 1{109} | Cl.Nc1cccc(n1)S(=O)(=O)N | 2{90} | Cc1nc(C=O)co1                             | 3{41} | COc1ccc([N+]#[C-])cc1    | 46.6 | 43 |
| 140 | 4{124,91,14} | COCCNC1=C(N=C2N1C=CC=C2CO)C1=CC2=C(OCCC2)C=C1  c:7,11,13,27,t:5,18,20                                      | Z8778278032 | 1{124} | Nc1ncccc1CO              | 2{91} | O=Cc1ccc2OCCCc2c1                         | 3{14} | COCC[N+]#[C-]            | 41.0 | 43 |
| 141 | 4{50,92,7}   | CC1=NOC(=C1)C1=C(NC2CCOCC2)N2C(C=CC=C2P(C)(C)=O)=N1  c:4,7,19,21,27,t:1                                    | Z8810903002 | 1{50}  | CP(=O)(C)c1cccc(N)n1     | 2{92} | Cc1cc(C=O)on1                             | 3{7}  | [C-]#[N+]C1CCOCC1        | 43.4 | 43 |
| 142 | 4{54,93,3}   | CN(C)C(=O)C1=CN2C(C=C1)=NC(=C2NC1=C(F)C=C(Cl)C=C1)C1=NC(CO)=CC=C1  c:9,11,13,17,23,30,32,t:5,20,26         | Z8798985024 | 1{54}  | Cl.CN(C)C(=O)c1ccc(N)nc1 | 2{93} | OCc1cccc(C=O)n1                           | 3{3}  | Fc1cc(Cl)ccc1[N+]#[C-]   | 50.9 | 43 |
| 143 | 4{125,50,26} | OCCC1=CN2C(C=C1)=NC([C@@H]1C[C@H]1C1OCCO1)=C2NCC1=CC=C(F)C=C1  &1:11,13,r,c:7,9,21,31,t:3,26,28            | Z8803896967 | 1{125} | Nc1ccc(CC(O)cn1          | 2{50} | O=C[C@@H]1C[C@H]1C2OCCO2  &1:2,4,r        | 3{26} | Fc1ccc(C[N+]#[C-])cc1    | 46.0 | 43 |
| 144 | 4{126,94,45} | COC1=C(F)N2C(NCC=C)=C(N=C2C=C1)C1=NC=CN=C1  c:2,10,12,15,20,22,t:18                                        | Z8781341797 | 1{126} | COc1ccc(N)nc1F           | 2{94} | O=Cc1cncn1                                | 3{45} | C=CC[N+]#[C-]            | 34.6 | 43 |
| 145 | 4{127,9,27}  | CCCCNC1=C(N=C2N1C=CC=C2F)C1=CSC=C1  c:7,11,13,20,t:5,17                                                    | Z8780121542 | 1{127} | Nc1ncccc1F               | 2{9}  | O=Cc1ccsc1                                | 3{27} | CCCC[N+]#[C-]            | 33.0 | 42 |
| 146 | 4{67,95,9}   | CNC1=C(N=C2C=CC=C(C)N12)C1=CC(=NC=C1)N(C)C  c:6,16,18,t:2,4,8,14                                           | Z8810903035 | 1{67}  | Cc1cccc(N)n1             | 2{95} | CN(C)c1cc(C=O)ccn1                        | 3{9}  | C[N+]#[C-]               | 32.1 | 42 |

|     |              |                                                                                                               |             |        |                                   |       |                               |       |                            |      |    |
|-----|--------------|---------------------------------------------------------------------------------------------------------------|-------------|--------|-----------------------------------|-------|-------------------------------|-------|----------------------------|------|----|
| 147 | 4{128,26,7}  | COCCN(C)C1=CN2C(C=C1)=NC(CCC1=CC=CC=C1)=C2NC1CCOCC1<br> c:10,12,19,21,23,t:6,17                               | Z8776690315 | 1{128} | COCCN(C)<br>c1ccc(N)nc<br>1       | 2{26} | O=CCCc1cc<br>ccc1             | 3{7}  | [C-]<br>#[N+]C1CC<br>OCC1  | 46.5 | 42 |
| 148 | 4{50,96,26}  | CP(C)(=O)C1=CC=CC2=NC(C3=CC(=NO3)C3=CC=CC=C3)=C(NCC3=CC=C(F)C=C3)N12<br> c:6,13,19,21,32,t:4,8,11,17,23,27,29 | Z8810902990 | 1{50}  | CP(=O)(C)c<br>1cccc(N)n1          | 2{96} | O=Cc1cc(no<br>1)c2ccccc2      | 3{26} | Fc1ccc(C[N+]<br>#[C-])cc1  | 52.0 | 42 |
| 149 | 4{40,25,22}  | CC1=CC(=CC2=NC(=C(NC3COCC3)N12)C1=CN=C(N=C1)C1CCOCC1)C(F)(F)F<br> c:3,20,22,t:1,5,7,18                        | Z8786958875 | 1{40}  | Cc1cc(cc(N)<br>n1)C(F)(F)<br>F    | 2{25} | O=Cc1ene(n<br>c1)C2CCOC<br>C2 | 3{22} | [C-]<br>#[N+]C1CO<br>C1    | 48.9 | 42 |
| 150 | 4{129,97,17} | CSC1=CC=CC2=NC(=C(NCC3CCOCC3)N12)C1=CC=C(F)C=C1  c:4,27,t:2,6,8,22,24                                         | Z8797781065 | 1{129} | CSc1cccc(N)<br>n1                 | 2{97} | Fc1ccc(C=O)<br>cc1            | 3{17} | [C-]<br>#[N+]CC1C<br>COCC1 | 41.7 | 42 |
| 151 | 4{130,77,27} | CCCCNC1=C(CC2CCCC2)N=C2N1C=C(F)C=C2C1  c:5,14,21,t:18                                                         | Z8780121734 | 1{130} | Nc1ncc(F)c<br>c1Cl                | 2{77} | O=CCC1CC<br>CC1               | 3{27} | CCCC[N+]#<br>C-]           | 35.9 | 41 |
| 152 | 4{131,26,7}  | C(CC1=CC=CC=C1)C1=C(NC2CCOCC2)N2N=C(C=CC2=N1)C1=CC=CC=C1<br> c:4,6,9,20,22,25,30,32,t:2,28                    | Z8776690317 | 1{131} | Nc1ccc(nn1)<br>c2ccccc2           | 2{26} | O=CCCc1cc<br>ccc1             | 3{7}  | [C-]<br>#[N+]C1CC<br>OCC1  | 44.1 | 41 |
| 153 | 4{76,26,7}   | CC1=C(Cl)N2C(C=C1)=NC(CCC1=CC=CC=C1)=C2NC1CCOCC1  c:1,6,8,15,17,19,t:13                                       | Z8776690313 | 1{76}  | Cc1ccc(N)n<br>c1Cl                | 2{26} | O=CCCc1cc<br>ccc1             | 3{7}  | [C-]<br>#[N+]C1CC<br>OCC1  | 40.4 | 40 |
| 154 | 4{132,15,13} | CNS(=O)(=O)C1=CC2=NC(=C(NCC3=CC=C(OC)C=C3)N2C=C1)C1=CC=C(OC)C=C1<br> c:19,24,33,t:5,7,9,13,15,27,29           | Z8776690328 | 1{132} | Cl.NNS(=O)<br>(=O)c1ccnc(<br>N)c1 | 2{15} | COc1ccc(C=<br>O)cc1           | 3{13} | COc1ccc(C[<br>N+]#[C-])cc1 | 49.4 | 40 |
| 155 | 4{91,94,6}   | CCOC(=O)CCCN1=C(N=C2C=CC(=CN12)C(N)=O)C1=NC=CN=C1<br> c:13,15,25,27,t:9,11,23                                 | Z8784059427 | 1{91}  | NC(=O)c1c<br>cc(N)nc1             | 2{94} | O=Cc1cncn<br>1                | 3{6}  | CCOC(=O)C<br>CC[N+]#[C-]   | 40.2 | 40 |
| 156 | 4{133,41,14} | COCCNC1=C(N=C2N1C=C(F)C=C2Br)C1=NC=CC=C1  c:7,14,20,22,t:5,11,18                                              | Z8786838536 | 1{133} | Nc1ncc(F)c<br>c1Br                | 2{41} | O=Cc1cccc<br>1                | 3{14} | COCC[N+]#<br>C-]           | 39.6 | 40 |
| 157 | 4{134,77,27} | CCCCNC1=C(CC2CCCC2)N=C2N1C=CC=C2OC1CCOCC1  c:5,14,18,20                                                       | Z8778277289 | 1{134} | Nc1ncccc1<br>OC2CCOC<br>C2        | 2{77} | O=CCC1CC<br>CC1               | 3{27} | CCCC[N+]#<br>C-]           | 40.0 | 40 |
| 158 | 4{124,98,46} | COC1=NC=C(N=C1)C1=C(NCC(C)=C)N2C=CC=C(CO)C2=N1  c:4,6,9,17,24,t:2,19                                          | Z8781341794 | 1{124} | Nc1ncccc1<br>CO                   | 2{98} | COc1cnc(C=<br>O)cn1           | 3{46} | CC(=C)C[N+]<br>#[C-]       | 35.0 | 40 |
| 159 | 4{135,99,35} | CCCC1=NC=CN2C(NCCCSC)=C(N=C12)C1=COC=N1  c:5,14,23,t:3,16,20                                                  | Z8803896937 | 1{135} | CCCc1cnc<br>c1N                   | 2{99} | O=Cc1coen<br>1                | 3{35} | CSCCC[N+]<br>#[C-]         | 35.6 | 40 |
| 160 | 4{35,15,9}   | CNC1=C(N=C2C=CC(C)=CN12)C1=CC=C(OC)C=C1  c:6,9,20,t:2,4,14,16                                                 | Z8712537091 | 1{35}  | Cc1ccc(N)n<br>c1                  | 2{15} | COc1ccc(C=<br>O)cc1           | 3{9}  | C[N+]#[C-]                 | 28.7 | 40 |

|     |               |                                                                                                |             |        |                          |        |                                           |       |                                   |      |    |
|-----|---------------|------------------------------------------------------------------------------------------------|-------------|--------|--------------------------|--------|-------------------------------------------|-------|-----------------------------------|------|----|
| 161 | 4{96,100,47}  | CCN1C=C(C=N1)[C@@H]1OCC[C@H]1C1=C(NC(C)C)N2C=CC(CN(C)CCOC)=CC2=N1  &1:7,11,r,c:3,5,14,21,30,33 | Z8801681818 | 1{96}  | COCCN(C)Cclccnc(N)c1     | 2{100} | CCn1cc(cn1)[C@@H]2OCC[C@H]2C=O  &1:7,11,r | 3{47} | CC(C)[N+]#[C-]                    | 47.3 | 40 |
| 162 | 4{36,26,7}    | BrC1=CN2C(C=C1)=NC(CCC1=CC=CC=C1)=C2NC1CCOCC1  c:5,7,14,16,18,t:1,12                           | Z8712587521 | 1{36}  | Nc1ccc(Br)cn1            | 2{26}  | O=CCCc1ccc1                               | 3{7}  | [C-]#[N+]C1CCOCC1                 | 42.6 | 39 |
| 163 | 4{136,101,14} | COCCNC1=C(N=C2N1C=C(C)C=C2Br)C1=C(CO)C=CS1  c:7,14,18,22,t:5,11                                | Z8810903027 | 1{136} | Cc1cnc(N)c(Br)c1         | 2{101} | OCc1ccsc1C=O                              | 3{14} | COCC[N+]#[C-]                     | 41.9 | 39 |
| 164 | 4{137,15,17}  | COC1=CC=C(C=C1)C1=C(NCC2CCOCC2)N2N=C(C)C=CC2=N1  c:4,6,9,24,27,t:2,21                          | Z8741907028 | 1{137} | Cc1ccc(N)cn1             | 2{15}  | COc1ccc(C=O)cc1                           | 3{17} | [C-]#[N+]CC1C COCC1               | 37.2 | 39 |
| 165 | 4{32,102,31}  | CSCCNC1=C(N=C2C=C(C=CN12)P(C)(C)=O)C1=C(Br)C(C)=CC(Cl)=N1  c:9,11,20,24,27,t:5,7               | Z8801681845 | 1{32}  | CP(=O)(C)c1ccnc(N)c1     | 2{102} | Cc1cc(Cl)nc(C=O)c1Br                      | 3{31} | CSCC[N+]#[C-]                     | 51.2 | 39 |
| 166 | 4{138,103,48} | CC(C)(C)OC(=O)N1CCCC(C1)NC1=C(N=C2C=CC=C(F)N12)C1CCC2(COC2)OC1  c:19,t:15,17,21                | Z8798985030 | 1{138} | Nc1cccc(F)n1             | 2{103} | O=CC1CCC2(COC2)OC1                        | 3{48} | CC(C)(C)OC(=O)N1CCCC(C1)[N+]#[C-] | 48.4 | 39 |
| 167 | 4{139,104,24} | COC1=CC(CNC2=C(N=C3C=C(C=CN23)C(F)F)C2=NC(C)=CO2)=CC=C1  c:11,13,24,27,29,t:2,7,9,21           | Z8810902993 | 1{139} | Nc1cc(cen1)C(F)F         | 2{104} | Cc1coc(C=O)n1                             | 3{24} | COc1cccc(C[N+]#[C-])c1            | 40.0 | 39 |
| 168 | 4{109,105,34} | CN1N=NC2=C1C(=CC=C2)C1=C(NCC2CCC(O2)N2C(C=CC=C2S(N)(=O)=O)=N1  c:2,4,7,9,12,24,26,32           | Z8803896953 | 1{109} | Cl.Nc1cccc(n1)S(=O)(=O)N | 2{105} | Cn1nc2cccc(C=O)c12                        | 3{34} | [C-]#[N+]CC1C CCO1                | 44.4 | 38 |
| 169 | 4{140,106,49} | COC1=C(N=CC=N1)C1=C(NC2CC(F)(F)C2)N2C(C=NC(I)=C2Cl)=N1  c:4,6,9,21,24,27,t:2                   | Z8781341776 | 1{140} | Nc1cnc(I)c(Cl)n1         | 2{106} | COc1cncnc1C=O                             | 3{49} | FC1(F)CC(C1)[N+]#[C-]             | 50.9 | 38 |
| 170 | 4{36,26,16}   | CC1=CC=CC(C)=C1NC1=C(CCC2=CC=CC=C2)N=C2C=CC(Br)=CN12  c:3,6,10,16,18,23,26,t:1,14,21           | Z8712537093 | 1{36}  | Nc1ccc(Br)cn1            | 2{26}  | O=CCCc1ccc1                               | 3{16} | Cc1cccc(C)c1[N+]#[C-]             | 43.5 | 38 |
| 171 | 4{125,107,31} | CSCCNC1=C(N=C2C=CC(CCO)=CN12)C1=NC(C)=CS1  c:9,14,22,t:5,7,19                                  | Z8810902950 | 1{125} | Nc1ccc(CC(O)cn1)         | 2{107} | Cc1csc(C=O)n1                             | 3{31} | CSCC[N+]#[C-]                     | 36.0 | 38 |
| 172 | 4{80,108,23}  | COC(=O)CCC(NC1=C(N=C2N1C=CN=C2OC)C1=CN=C(N=C1)N1CCOCC1)C(=O)OC  c:10,14,16,23,25,t:8,21        | Z8801681842 | 1{80}  | COc1cncnc1N              | 2{108} | O=Cc1cnc(nc1)N2CCOCC2                     | 3{23} | COC(=O)CC(C[N+]#[C-])C(=O)OC      | 49.5 | 38 |

|     |               |                                                                                                           |             |        |                          |        |                                             |       |                            |      |    |
|-----|---------------|-----------------------------------------------------------------------------------------------------------|-------------|--------|--------------------------|--------|---------------------------------------------|-------|----------------------------|------|----|
| 173 | 4{81,26,13}   | COC1=CC=C(CNC2=C(CCC3=CC=CC=C3)N=C3C=NC=CN23)C=C1<br> c:8,14,16,21,23,28,t:2,4,12,19                      | Z8712562312 | 1{81}  | Ne1cncen1                | 2{26}  | O=CCCc1ccc1                                 | 3{13} | COc1ccc(C[N+]#[C-])cc1     | 36.5 | 38 |
| 174 | 4{141,109,32} | CN1C=C(C)C(=N1)C1=C(NC2CCC2)N2C=C(C(NC(C)=O)=CC2=N1  c:5,8,17,23,26,t:2                                   | Z8786958863 | 1{141} | CC(=O)Nc1ccnc(N)c1       | 2{109} | Cc1cn(C)nc1C=O                              | 3{32} | [C-]#[N+]C1CC C1           | 34.4 | 38 |
| 175 | 4{109,110,50} | CP(C)(=O)C1=NC=C(C=C1)C1=C(NC2=CC3=C(OCCO3)C=C2)N2C(C=CC=C2S(N)(=O)=O)=N1  c:6,8,11,23,28,30,36,t:4,14,16 | Z8803896963 | 1{109} | Cl.Nc1cccc(n1)S(=O)(=O)N | 2{110} | CP(=O)(C)c1ccc(C=O)cn1                      | 3{50} | [C-]#[N+]c1ccc2OCCOc2e1    | 50.5 | 37 |
| 176 | 4{48,93,35}   | CSCCNC1=C(N=C2C=C(C=CN12)S(C)(=O)=O)C1=NC(CO)=CC=C1<br> c:10,12,25,27,t:6,8,21                            | Z8801681824 | 1{48}  | CS(=O)(=O)c1ccnc(N)c1    | 2{93}  | OCc1cccc(C=O)n1                             | 3{35} | CSCCC[N+]#[C-]             | 41.1 | 37 |
| 177 | 4{142,111,51} | CC(C)(C)OC(=O)NCCNC1=C(N=C2N1C=CC=C2OCCS(C)(=O)=O)C1CCCC1<br> c:13,17,19,t:11                             | Z8808559876 | 1{142} | CS(=O)(=O)CCOc1ccnc1N    | 2{111} | O=CC1CCC C1                                 | 3{51} | CC(C)(C)OC(=O)NCC[N+]#[C-] | 47.2 | 37 |
| 178 | 4{83,112,52}  | CP(C)(=O)C1=CN2C(C=C1)=NC(=C2NCCOC C1CC1)C1=C2C=CC=NN2N=C1<br> c:8,10,12,24,26,28,32,t:4                  | Z8786958945 | 1{83}  | CP(=O)(C)c1ccc(N)nc1     | 2{112} | O=Cc1cnn2nccc12                             | 3{52} | [C-]#[N+]CCOC C1CC1        | 42.8 | 37 |
| 179 | 4{143,113,10} | CCC1=NN2C(C=C1)=NC(=C2NC1CCOC1)C1=CC(COC)=C(OC)C=C1  c:6,8,10,29,t:2,20,25                                | Z8801681837 | 1{143} | CCc1ccc(N)nn1            | 2{113} | COCc1cc(C=O)ccc1OC                          | 3{10} | [C-]#[N+]C1CC OC1          | 38.6 | 37 |
| 180 | 4{37,114,39}  | CCOCCNC1=C(N=C2C=CC=C(C(F)F)N12)[C@@@H]1CC[C@@H](C1)C(=O)OC<br> &1:18,21,r,c:10,t:6,8,12                  | Z8801681838 | 1{37}  | Cl.Nc1cccc(n1)C(F)F      | 2{114} | COC(=O)[C@@@H]1CC[C@@H](C1)C=O<br> &1:4,7,r | 3{39} | CCOCC[N+]#[C-]             | 38.4 | 37 |
| 181 | 4{144,115,15} | CCNC1=C(N=C2C=CC(=CN12)S(=O)(=O)NC)C1=CC(OC)=NN1C  c:7,9,23,t:3,5,19                                      | Z8808559877 | 1{144} | CNS(=O)(=O)c1ccc(N)nc1   | 2{115} | COc1cc(C=O)n(C)n1                           | 3{15} | CC[N+]#[C-]                | 36.4 | 37 |
| 182 | 4{145,116,17} | CS(=O)(=O)C1=CC=CC2=NC(=C(NCC3CCO CC3)N12)C1=CN(CCC=C)N=N1<br> c:6,31,t:4,8,10,24                         | Z8778278046 | 1{145} | CS(=O)(=O)c1cccc(N)n1    | 2{116} | C=CCcn1cc(C=O)nn1                           | 3{17} | [C-]#[N+]CC1C COCC1        | 42.0 | 36 |
| 183 | 4{146,117,12} | CS(=O)(=O)C1=CN2C(C=C1)=NC(C1CCCC1 CC1)=C2NCC1CCOC1  c:8,10,21,t:4                                        | Z8810903032 | 1{146} | CS(=O)(=O)c1ccc(N)nc1    | 2{117} | O=CC1CCC C21CC2                             | 3{12} | [C-]#[N+]CC1C COC1         | 37.9 | 36 |



|     |               |                                                                                                      |             |        |                                       |        |                                 |       |                              |      |    |
|-----|---------------|------------------------------------------------------------------------------------------------------|-------------|--------|---------------------------------------|--------|---------------------------------|-------|------------------------------|------|----|
| 184 | 4{147,118,17} | CC1=NC=CC(=C1)C1=C(NCC2CCOCC2)N2<br>C3=C(CCC3)C=CC2=N1  c:3,5,8,26,29,t:1,20                         | Z8778277442 | 1{147} | Ne1ccc2CC<br>Cc2n1                    | 2{118} | Cc1cc(C=O)<br>ccn1              | 3{17} | [C-]<br>#[N+]CC1C<br>COCC1   | 35.2 | 36 |
| 185 | 4{148,14,14}  | COCCNC1=C(N=C2C=CC(=CN12)S(=O)(=O)<br>N1CCCCC1)C1=CC=C(C)C=C1<br> c:9,11,31,t:5,7,26,28              | Z8776690322 | 1{148} | Ne1ccc(cn1)<br>)S(=O)(=O)<br>N2CCCCC2 | 2{14}  | Cc1ccc(C=O)<br>)cc1             | 3{14} | COCC[N+]#[<br>C-]            | 41.5 | 36 |
| 186 | 4{149,77,17}  | C1C1=CN2C(NCC3CCOCC3)=C(CC3CCCC3)<br>N=C2C(Br)=C1  c:22,26,t:1,13                                    | Z8786845282 | 1{149} | Ne1ncc(Cl)<br>cc1Br                   | 2{77}  | O=CCC1CC<br>CC1                 | 3{17} | [C-]<br>#[N+]CC1C<br>COCC1   | 41.3 | 36 |
| 187 | 4{150,119,53} | CCOC(=O)C1=NN=C(N1)C1=C(NCCOCC2=<br>CC=CC=C2)N2C=CC(=CC2=N1)C1CCOC1<br> c:7,11,20,22,26,28,31,t:5,18 | Z8801681847 | 1{150} | Ne1cc(cen1)<br>)C2CCOC2               | 2{119} | CCOC(=O)c<br>1nnc(C=O)[n<br>H]1 | 3{53} | [C-]<br>#[N+]CCOC<br>c1cccc1 | 46.1 | 36 |
| 188 | 4{81,48,13}   | COC1=CC=C(CNC2=C(N=C3C=NC=CN23)C<br>2=CNC(=N2)C2CCC2)C=C1<br> c:12,14,22,30,t:2,4,8,10,19            | Z8810903030 | 1{81}  | Ne1cncen1                             | 2{48}  | O=Cc1c[nH]<br>c(n1)C2CCC<br>2   | 3{13} | COc1ccc(C[<br>N+]#[C-])cc1   | 36.0 | 36 |
| 189 | 4{36,14,18}   | CC1=CC=C(C=C1)C1=C(NC(C)(C)C)N2C=C(<br>Br)C=CC2=N1  c:3,5,8,19,22,t:1,16                             | Z3220348675 | 1{36}  | Ne1ccc(Br)<br>cn1                     | 2{14}  | Cc1ccc(C=O)<br>)cc1             | 3{18} | CC(C)(C)[N<br>+]#[C-]        | 34.4 | 36 |
| 190 | 4{151,14,14}  | COCCNC1=C(N=C2C=NC=C(C1)N12)C1=CC<br>=C(C)C=C1  c:9,22,t:5,7,11,17,19                                | Z8711872648 | 1{151} | Ne1cnc(Cl)<br>n1                      | 2{14}  | Cc1ccc(C=O)<br>)cc1             | 3{14} | COCC[N+]#[<br>C-]            | 29.6 | 35 |
| 191 | 4{35,26,54}   | CC1=CN2C(C=C1)=NC(CCC1=CC=CC=C1)=<br>C2NC1=CC=CC=C1<br> c:5,7,14,16,18,24,26,t:1,12,22               | Z8700285742 | 1{35}  | Cc1ccc(N)n<br>c1                      | 2{26}  | O=CCc1cc<br>ccc1                | 3{54} | [C-]<br>#[N+]c1cccc<br>c1    | 30.6 | 35 |
| 192 | 4{145,120,22} | CS(=O)(=O)C1=CC=CC2=NC(=C(NC3COC3)<br>N12)C1=NC2=C(C=CC=C2)C=N1<br> c:6,25,27,30,t:4,8,10,21,23      | Z8808559874 | 1{145} | CS(=O)(=O)<br>c1cccc(N)n<br>1         | 2{120} | O=Cc1ncc2c<br>cccc2n1           | 3{22} | [C-]<br>#[N+]C1CO<br>C1      | 36.8 | 34 |
| 193 | 4{152,29,7}   | CCN1C=CC(=N1)C1=C(NC2CCOCC2)N2C=<br>C(N=C(Cl)C2=N1)C1=CC=CC=C1<br> c:3,5,8,19,25,30,32,t:21,28       | Z8786927263 | 1{152} | Ne1ncc(nc1<br>Cl)c2cccc2              | 2{29}  | CCn1ccc(C=<br>O)n1              | 3{7}  | [C-]<br>#[N+]C1CC<br>OCC1    | 38.9 | 34 |
| 194 | 4{141,121,55} | CCC1=CON=C1C1=C(NCCC#N)N2C=CC(N<br>C(C)=O)=CC2=N1  c:5,8,16,22,25,t:2                                | Z8786958870 | 1{141} | CC(=O)Ne1<br>ccnc(N)c1                | 2{121} | CCc1cnc1C<br>=O                 | 3{55} | [C-]<br>#[N+]CCC#<br>N       | 31.1 | 34 |
| 195 | 4{153,122,15} | CCNC1=C(N=C2C=CC=C(N12)C(C)(C)O)C1<br>=CN=C(N=C1)C1=CC=CS1<br> c:7,9,20,22,27,t:3,5,18,25            | Z8798985031 | 1{153} | CC(C)(O)c1<br>cccc(N)n1               | 2{122} | O=Cc1cnc(n<br>c1)c2cccs2        | 3{15} | CC[N+]#[C-]                  | 34.3 | 33 |
| 196 | 4{143,103,33} | CCC1=NN2C(NCC3=C(OC)C=CC=C3)=C(N=<br>C2C=C1)C1CCC2(COC2)OC1<br> c:8,12,14,16,18,21,t:2               | Z8798985020 | 1{143} | CCc1ccc(N)<br>nn1                     | 2{103} | O=CC1CCC<br>2(COC2)OC<br>1      | 3{33} | COc1cccc1<br>C[N+]#[C-]      | 36.8 | 33 |

|     |               |                                                                                                          |             |        |                                  |        |                                       |       |                            |      |    |
|-----|---------------|----------------------------------------------------------------------------------------------------------|-------------|--------|----------------------------------|--------|---------------------------------------|-------|----------------------------|------|----|
| 197 | 4{154,123,49} | CC1=NC=C(N=C1)C1=C(NC2CC(F)(F)C2)N2<br>C=CC(=CC2=N1)[N+](=[O-])=O<br> c:3,5,8,19,21,24,t:1               | Z8803896961 | 1{154} | Nc1cc(cen1)<br>)[N+](=O)[<br>O-] | 2{123} | Cc1cnc(C=O)<br>)cn1                   | 3{49} | FC1(F)CC(C<br>1)[N+]#[C-]  | 32.3 | 33 |
| 198 | 4{92,124,7}   | COC1=C(OCC2=C(C)ON=C2C)C=CC(=C1)C<br>1=C(NC2CCOCC2)N2C=CC(=CC2=N1)C(N)<br>=O  c:2,6,10,14,16,19,30,32,35 | Z8810903018 | 1{92}  | NC(=O)c1c<br>cnc(N)c1            | 2{124} | COc1cc(C=O)<br>)ccc1OCc2c(<br>C)noc2C | 3{7}  | [C-<br>]#[N+]C1CC<br>OCC1  | 43.0 | 32 |
| 199 | 4{155,125,7}  | COC1=NC=NC(=C1)C1=C(NC2CCOCC2)N2<br>C=CC=C(C1)C2=N1  c:4,6,9,20,26,t:2,22                                | Z8810902988 | 1{155} | Ne1ncecc1<br>Cl                  | 2{125} | COc1cc(C=O)<br>)ncn1                  | 3{7}  | [C-<br>]#[N+]C1CC<br>OCC1  | 31.3 | 32 |
| 200 | 4{156,9,14}   | COCCNC1=C(N=C2N1C(Cl)=CC=C2Cl)C1=<br>CSC=C1  c:7,12,14,21,t:5,18                                         | Z8786838532 | 1{156} | Ne1nc(Cl)c<br>cc1Cl              | 2{9}   | O=Cc1ccsc1                            | 3{14} | COCC[N+]#[<br>C-]          | 29.8 | 32 |
| 201 | 4{157,19,9}   | CNC1=C(N=C2C=C(C)C=C(Br)N12)C1=C(O<br>C)C=NN1C  c:15,19,t:2,4,6,9                                        | Z8808559897 | 1{157} | Cc1cc(N)nc<br>(Br)c1             | 2{19}  | COc1cnn(C)<br>c1C=O                   | 3{9}  | C[N+]#[C-]                 | 30.3 | 32 |
| 202 | 4{94,126,10}  | COC1=CC(=CC(F)=C1)C1=C(NC2CCOC2)N2<br>N=C(F)C=CC2=N1  c:4,7,10,23,26,t:2,20                              | Z8801681829 | 1{94}  | Ne1ccc(F)n<br>n1                 | 2{126} | COc1cc(F)cc<br>(C=O)c1                | 3{10} | [C-<br>]#[N+]C1CC<br>OC1   | 29.7 | 32 |
| 203 | 4{41,127,9}   | CNC1=C(N=C2C=NC(C)=CN12)C1=CC(OC)<br>=NS1  c:6,9,18,t:2,4,14                                             | Z8798985021 | 1{41}  | Cc1cnc(N)c<br>n1                 | 2{127} | COc1cc(C=O)<br>)sn1                   | 3{9}  | C[N+]#[C-]                 | 23.5 | 32 |
| 204 | 4{158,128,18} | CC1=CC(C)=C(C2=C(NC(C)(C)C)N3C=C(N=<br>CC3=N2)P(C)(C)=O)C(C)=C1<br> c:6,14,16,19,27,t:1,4                | Z8798985019 | 1{158} | CP(=O)(C)c<br>1cnc(N)cn1         | 2{128} | Cc1cc(C)c(C<br>=O)c(C)c1              | 3{18} | CC(C)(C)[N<br>+]#[C-]      | 32.7 | 32 |
| 205 | 4{38,129,13}  | COC1=CC=C(CNC2=C(N=C3C=C(C=CN23)<br>C#N)C2=CC=CC3=NC=NN23)C=C1<br> c:12,14,23,27,32,t:2,4,8,10,21,25     | Z8801681835 | 1{38}  | Ne1cc(C#N)<br>)cen1              | 2{129} | O=Cc1cccc2<br>ncmn12                  | 3{13} | COc1ccc(C[<br>N+]#[C-])cc1 | 33.6 | 31 |
| 206 | 4{106,15,9}   | CNC1=C(N=C2C=CC(OC)=NN12)C1=CC=C(<br>OC)C=C1  c:6,10,21,t:2,4,15,17                                      | Z8776690310 | 1{106} | COc1ccc(N)<br>nn1                | 2{15}  | COc1ccc(C=<br>O)cc1                   | 3{9}  | C[N+]#[C-]                 | 23.9 | 31 |
| 207 | 4{41,15,9}    | CNC1=C(N=C2C=NC(C)=CN12)C1=CC=C(O<br>C)C=C1  c:6,9,20,t:2,4,14,16                                        | Z8776690348 | 1{41}  | Cc1cnc(N)c<br>n1                 | 2{15}  | COc1ccc(C=<br>O)cc1                   | 3{9}  | C[N+]#[C-]                 | 22.4 | 31 |
| 208 | 4{159,9,7}    | NC(=O)C1=CC=C(C1)N2C(NC3CCOCC3)=C(<br>N=C12)C1=CSC=C1  c:17,26,t:3,5,19,23                               | Z8780122422 | 1{159} | NC(=O)c1c<br>cc(Cl)nc1N          | 2{9}   | O=Cc1ccsc1                            | 3{7}  | [C-<br>]#[N+]C1CC<br>OCC1  | 31.3 | 31 |
| 209 | 4{160,77,27}  | CCCCNC1=C(CC2CCCC2)N=C2N1C=C(Br)C<br>=C2C#C  c:5,14,21,t:18                                              | Z8784059428 | 1{160} | Ne1ncc(Br)<br>cc1C#C             | 2{77}  | O=CCC1CC<br>CC1                       | 3{27} | CCCC[N+]#[<br>C-]          | 31.1 | 31 |
| 210 | 4{85,130,35}  | COC1=NN=C(C=C1)C1=C(NCCCSC)N2C(C=<br>C(C=C2C)C#N)=N1  c:4,6,9,19,21,26,t:2                               | Z8810902989 | 1{85}  | Cc1cc(C#N)<br>cc(N)n1            | 2{130} | COc1ccc(C=<br>O)nn1                   | 3{35} | CSCCC[N+]<br>#[C-]         | 30.6 | 31 |

|     |               |                                                                                                 |             |        |                            |        |                                  |       |                              |      |    |
|-----|---------------|-------------------------------------------------------------------------------------------------|-------------|--------|----------------------------|--------|----------------------------------|-------|------------------------------|------|----|
| 211 | 4{150,131,22} | C1CC1C1=NNC(=N1)C1=C(NC2COC2)N2C=CC(=CC2=N1)C1CCOC1  c:7,10,19,21,24,t:4                        | Z8801681805 | 1{150} | Nc1cc(cen1)C2CCOC2         | 2{131} | O=Ce1nc(n[nH]1)C2CC2             | 3{22} | [C-]#[N+]C1CO<br>C1          | 30.4 | 31 |
| 212 | 4{83,132,18}  | COC1=C(C2=C(NC(C)(C)C)N3C=C(C=CC3=N2)P(C)(C)=O)C(Br)=C(F)C=C1  c:2,4,12,14,17,28,t:25           | Z8801681816 | 1{83}  | CP(=O)(C)c1ccc(N)nc1       | 2{132} | COc1ccc(F)c(Br)c1C=O             | 3{18} | CC(C)(C)[N+]#[C-]            | 38.4 | 30 |
| 213 | 4{161,133,7}  | C(C1CCC=CC1)C1=C(NC2CCOCC2)N2N=C=C=CC2=N1  c:4,8,19,21,24                                       | Z8808559853 | 1{161} | Ne1cccenn1                 | 2{133} | O=CCC1CC=C=CC1                   | 3{7}  | [C-]#[N+]C1CCOCC1            | 25.6 | 30 |
| 214 | 4{81,22,26}   | FC1=CC=C(CNC2=C(N=C3C=NC=CN23)C2=CC=CC=C2)C=C1  c:11,13,20,22,25,t:1,3,7,9,18                   | Z8712538668 | 1{81}  | Ne1cncen1                  | 2{22}  | O=Cc1cccc1                       | 3{26} | Fe1ccc(C[N+]#[C-])cc1        | 25.9 | 30 |
| 215 | 4{162,134,12} | CCNC(=O)C1=CC2=NC(=C(NCC3CCOC3)N2C2=C1C=CC=C2)C1=NC(OC)=CC=N1  c:21,24,26,33,35,t:5,7,9,29      | Z8810902973 | 1{162} | CCNC(=O)c1cc(N)nc2cccc12   | 2{134} | COc1ccnc(C=O)n1                  | 3{12} | [C-]#[N+]CC1C<br>COC1        | 35.9 | 30 |
| 216 | 4{163,97,27}  | CCCCNC1=C(N=C2C=CC3=C(C=CC=C3)N12)C1=CC=C(F)C=C1  c:9,13,15,26,t:5,7,11,21,23                   | Z8778277625 | 1{163} | Ne1ccc2ccc<br>cc2n1        | 2{97}  | Fe1ccc(C=O)<br>cc1               | 3{27} | CCCC[N+]#[C-]                | 26.7 | 30 |
| 217 | 4{164,135,21} | CN(C)CC1=CC2=NC(=C(NCC3CC3)N2C=C1)C1=C(C)N(C)N=C1C  c:18,21,26,t:4,6,8                          | Z8798985065 | 1{164} | CN(C)Cc1c<br>cnc(N)c1      | 2{135} | Cc1nn(C)c(C)<br>c1C=O            | 3{21} | [C-]#[N+]CC1C<br>C1          | 27.5 | 29 |
| 218 | 4{153,136,22} | COC1=CC(OC)=C(Br)C(C)=C1C1=C(NC2CO<br>C2)N2C(C=CC=C2C(C)(C)O)=N1  c:10,13,23,25,31,t:2,6        | Z8810903033 | 1{153} | CC(C)(O)c1<br>cccc(N)n1    | 2{136} | COc1cc(OC)<br>c(C=O)c(C)c<br>1Br | 3{22} | [C-]#[N+]C1CO<br>C1          | 37.0 | 29 |
| 219 | 4{93,79,14}   | COCCNC1=C(N=C2C=NC(OC)=CN12)C1=NC=CO1  c:9,13,20,t:5,7,18                                       | Z8778278042 | 1{93}  | COc1cnc(N)<br>cn1          | 2{79}  | O=Cc1ncco1                       | 3{14} | COCC[N+]#[C-]                | 22.3 | 29 |
| 220 | 4{165,40,17}  | OCC1=CSC(=N1)C1=C(NCC2CCOCC2)N2C=CC=C(C2=N1)C1=CC=CC=C1  c:5,8,20,22,25,30,32,t:2,28            | Z8780122087 | 1{165} | Ne1ncccc1c<br>2cccc2       | 2{40}  | OCc1csc(C=O)n1                   | 3{17} | [C-]#[N+]CC1C<br>COCC1       | 32.2 | 28 |
| 221 | 4{62,137,11}  | CC1=C(C(C)=NO1)C1=C(NCC2=CC(Br)=CC=C2)N2C=CC(CO)=CC2=N1  c:4,8,15,17,21,25,28,t:1,12            | Z8810902983 | 1{62}  | Ne1cc(CO)c<br>en1          | 2{137} | Cc1noc(C)c1<br>C=O               | 3{11} | Bre1cccc(C[<br>N+]#[C-])c1   | 32.4 | 28 |
| 222 | 4{144,138,37} | CNS(=O)(=O)C1=CN2C(C=C1)=NC(=C2NC1CC(C1)C(=O)OC)C1=NC(C)=NC(C)=C1  c:9,11,13,29,32,t:5,26       | Z8810903016 | 1{144} | CNS(=O)(=O)c1ccc(N)<br>nc1 | 2{138} | Cc1cc(C=O)<br>nc(C)n1            | 3{37} | COC(=O)C1<br>CC(C1)[N+]#[C-] | 33.3 | 28 |
| 223 | 4{164,139,24} | COC1=CC(CNC2=C(N=C3C=C(CN(C)C)C=C<br>N23)C2=C(C)N(CCO)N=C2C)=CC=C1  c:17,22,29,32,34,t:2,7,9,11 | Z8810903038 | 1{164} | CN(C)Cc1c<br>cnc(N)c1      | 2{139} | Cc1nn(CCO)<br>c(C)c1C=O          | 3{24} | COc1cccc(C[<br>N+]#[C-])c1   | 33.3 | 27 |

|     |               |                                                                                                                   |             |        |                           |        |                                 |       |                                  |      |    |
|-----|---------------|-------------------------------------------------------------------------------------------------------------------|-------------|--------|---------------------------|--------|---------------------------------|-------|----------------------------------|------|----|
| 224 | 4{31,140,22}  | COCCCC(NC(=O)OC(C)(C)C)C1=C(NC2COC2)N2C3=C(OCC3)C=CC2=N1  c:13,28,31,t:22                                         | Z8810903043 | 1{31}  | Nc1ccc2OC<br>Cc2n1        | 2{140} | COCCCC(NC(=O)OC(C)(C)C)C=O      | 3{22} | [C-]<br>#[N+]C1CO<br>C1          | 30.8 | 27 |
| 225 | 4{166,141,22} | COC1=NC(CI)=CC(=C1)C1=C(NC2COC2)N2C=CC(CSCCO)=CC2=N1  c:5,7,10,19,26,29,t:2                                       | Z8801681806 | 1{166} | Nc1cc(CSCCO)ccn1          | 2{141} | COc1cc(C=O)cc(CI)n1             | 3{22} | [C-]<br>#[N+]C1CO<br>C1          | 31.0 | 27 |
| 226 | 4{106,142,9}  | CNC1=C(N=C2C=CC(OC)=NN12)C1=C(CCC=C)C=CC=C1  c:6,10,15,21,23,t:2,4                                                | Z8778278045 | 1{106} | COc1ccc(N)nn1             | 2{142} | C=CCCc1ccc<br>cc1C=O            | 3{9}  | C[N+]#[C-]                       | 22.4 | 27 |
| 227 | 4{167,110,56} | CC1=CN=C(C)C2=NC(=C(NC3=CC=C(OCC4=CC=CC=C4)C=C3)N12)C1=CN=C(C=C1)P(C)(C)O  c:19,21,24,32,34,t:1,3,6,8,11,13,17,30 | Z8803896947 | 1{167} | Cc1cnc(C)c(N)n1           | 2{110} | CP(=O)(C)c1ccc(C=O)cn1          | 3{56} | [C-]<br>#[N+]c1ccc(OCC2cccc2)cc1 | 35.9 | 27 |
| 228 | 4{168,14,17}  | CC1=CC=C(C=C1)C1=C(NCC2CCOCC2)N2C(C=NC=C2C#N)=N1  c:3,5,8,21,23,27,t:1                                            | Z8776690324 | 1{168} | Nc1cnc(C#N)n1             | 2{14}  | Cc1ccc(C=O)cc1                  | 3{17} | [C-]<br>#[N+]CC1C<br>COCC1       | 25.0 | 27 |
| 229 | 4{169,143,13} | CNC(=O)C1=NN2C(C=C1)=NC(=C2NCC1=C(C=C(OC)C=C1)C1=CC(OC)=C(OC)C=C1  c:8,10,12,23,34,t:4,17,19,26,30                | Z8810902954 | 1{169} | CNC(=O)c1ccc(N)nn1        | 2{143} | COc1ccc(C=O)cc1OC               | 3{13} | COc1ccc(C[N+]#[C-])cc1           | 32.1 | 27 |
| 230 | 4{170,94,6}   | CCOC(=O)CCNC1=C(N=C2N1C=CC(C)=C2Br)C1=NC=CN=C1  c:11,15,18,24,26,t:9,22                                           | Z8780121700 | 1{170} | Cc1cnc(N)c1Br             | 2{94}  | O=Cc1cncn1                      | 3{6}  | CCOC(=O)C<br>CC[N+]#[C-]         | 29.9 | 26 |
| 231 | 4{171,115,15} | CCNC1=C(N=C2C=C(C=CN12)N1C=CN=C1)C1=CC(OC)=NN1C  c:7,9,15,17,24,t:3,5,20                                          | Z8808559875 | 1{171} | Nc1cc(ccn1)n2ccnc2        | 2{115} | COc1cc(C=O)n(C)n1               | 3{15} | CC[N+]#[C-]                      | 23.7 | 26 |
| 232 | 4{121,144,10} | BrC1=CC2=NC(C3=NOC(=C3)C3CC3)=C(NC3CCOC3)N2C=C1  c:9,26,t:1,3,6,15                                                | Z8810902956 | 1{121} | Nc1cc(Br)cn1              | 2{144} | O=Cc1cc(on1)C2CC2               | 3{10} | [C-]<br>#[N+]C1CC<br>OC1         | 26.8 | 26 |
| 233 | 4{172,145,29} | CCOC(=O)CCNC1=C(N=C2N1C=CC1=C2CCO1)C1=CN(C)C(=O)C2=C1N=CC=C2  c:10,14,16,29,32,34,t:8,23                          | Z8810902987 | 1{172} | Nc1nccc2O<br>CCc21        | 2{145} | Cn1cc(C=O)c2ncccc2e1=O          | 3{29} | CCOC(=O)C<br>C[N+]#[C-]          | 29.7 | 25 |
| 234 | 4{32,146,7}   | C[C@@H]1C[C@@H]1CCCC1=C(NC2CCOC2)N2C=CC(=CC2=N1)P(C)(C)O  &l:1,3,r,c:7,18,20,23                                   | Z8810903008 | 1{32}  | CP(=O)(C)c1ccnc(N)c1      | 2{146} | C[C@@H]1C[C@@H]1CCC=O  &l:1,3,r | 3{7}  | [C-]<br>#[N+]C1CC<br>OCC1        | 25.7 | 25 |
| 235 | 4{173,147,57} | COCCCCC1=C(NCC2=CC=CC=C2)N2C=C(C=C(Br)C2=N1)C(=O)N(C)C  c:6,12,14,18,24,t:10,20                                   | Z8808559883 | 1{173} | CN(C)C(=O)c1cnc(N)c(Br)c1 | 2{147} | COCCCCC=O                       | 3{57} | [C-]<br>#[N+]Cc1cc<br>ccc1       | 31.4 | 25 |

|     |               |                                                                                            |             |        |                         |        |                           |       |                               |      |    |
|-----|---------------|--------------------------------------------------------------------------------------------|-------------|--------|-------------------------|--------|---------------------------|-------|-------------------------------|------|----|
| 236 | 4{174,14,17}  | CC1=CC=C(C=C1)C1=C(NCC2CCOCC2)N2C(C=CC=C2C#N)=N1  c:3,5,8,21,23,27,t:1                     | Z8776690319 | 1{174} | Nc1cccc(C#N)n1          | 2{14}  | Cc1ccc(C=O)cc1            | 3{17} | [C-]#[N+]CC1C COCC1           | 23.3 | 25 |
| 237 | 4{175,148,24} | COC1=C(C(C)=NN1C)C1=C(NCC2=CC(OC)=CC=C2)N2C=CC=C(OCCF)C2=N1  c:5,10,18,20,24,33,t:2,14,26  | Z8803896932 | 1{175} | Nc1ncccc1 OCCF          | 2{148} | COc1c(C=O)c(C)nn1C        | 3{24} | COc1cccc(C[N+]#[C-])c1        | 29.5 | 25 |
| 238 | 4{176,29,6}   | CCOC(=O)CCCN1=C(N=C2N1C=CN=C2N1CCCC1)C1=NN(CC)C=C1  c:11,15,17,31,t:9,26                   | Z8784060255 | 1{176} | Nc1ncnc1 N2CCCC2        | 2{29}  | CCn1ccc(C=O)n1            | 3{6}  | CCOC(=O)C CC[N+]#[C-]         | 27.6 | 25 |
| 239 | 4{141,149,22} | COC1=C(OC)C(=CC(Br)=C1)C1=C(NC2COC2)N2C=CC(NC(C)=O)=CC2=N1  c:2,6,9,12,21,27,30            | Z8808559892 | 1{141} | CC(=O)Nc1 cnc(N)c1      | 2{149} | COc1cc(Br)c c(C=O)c1OC    | 3{22} | [C-]#[N+]C1CO C1              | 30.9 | 25 |
| 240 | 4{177,69,17}  | CN1N=C(C=C1C)C1=C(NCC2CCOCC2)N2C=CC3=C(C=CC=N3)C2=N1  c:2,4,8,20,24,26,30,t:22             | Z8778277872 | 1{177} | Nc1nccc2nc ccc12        | 2{69}  | Cc1cc(C=O) nn1C           | 3{17} | [C-]#[N+]CC1C COCC1           | 25.2 | 25 |
| 241 | 4{54,150,49}  | CN(C)C(=O)C1=CN2C(C=C1)=NC(C1CCC(C1)OCC1=CC=CC=C1)=C2NC1CC(F)(F)C1  c:9,11,25,27,29,t:5,23 | Z8801681834 | 1{54}  | Cl.CN(C)C(=O)c1ccc(N)n1 | 2{150} | O=CC1CCC( CC1)OCc2cc ccc2 | 3{49} | FC1(F)CC(C1)[N+]#[C-]         | 32.3 | 25 |
| 242 | 4{178,9,6}    | CCOC(=O)CCCN1=C(N=C2N1C=C(C=C2C#C)C(F)(F)F)C1=CSC=C1  c:11,15,17,29,t:9,26                 | Z8780122088 | 1{178} | Nc1ncc(cc1 C#C)C(F)(F)F | 2{9}   | O=Cc1ccsc1                | 3{6}  | CCOC(=O)C CC[N+]#[C-]         | 28.1 | 25 |
| 243 | 4{139,151,39} | CCOCCN1=C(N=C2C=C(C=CN12)C(F)F)C1=CC(C)=NN1  c:10,12,23,t:6,8,20                           | Z8781341768 | 1{139} | Nc1cc(cen1 )C(F)F       | 2{151} | Cc1cc(C=O)[ nH]n1         | 3{39} | CCOCC[N+]#[C-]                | 22.1 | 24 |
| 244 | 4{54,14,58}   | CN(C)C(=O)C1=CN2C(C=C1)=NC(=C2NC1(C)CC1)C1=CC=C(C)C=C1  c:9,11,13,27,t:5,22,24             | Z8776690331 | 1{54}  | Cl.CN(C)C(=O)c1ccc(N)n1 | 2{14}  | Cc1ccc(C=O)cc1            | 3{58} | CC1(CC1)[N+]#[C-]             | 22.7 | 24 |
| 245 | 4{41,15,54}   | COC1=CC=C(C=C1)C1=C(NC2=CC=CC=C2)N2C=C(C)N=CC2=N1  c:4,6,9,14,16,23,26,t:2,12,20           | Z8711872689 | 1{41}  | Cc1cnc(N)c n1           | 2{15}  | COc1ccc(C=O)cc1           | 3{54} | [C-]#[N+]c1cccc c1            | 21.4 | 24 |
| 246 | 4{61,81,23}   | CCC1=CC=CC2=NC(=C(NC(CCC(=O)OC)C(=O)OC)N12)C1=NC(=CC=C1)C(F)F  c:4,27,29,t:2,6,8,25        | Z8810903044 | 1{61}  | CCc1cccc( N)n1          | 2{81}  | FC(F)c1cccc( C=O)n1       | 3{23} | COC(=O)CC C([N+]#[C-])C(=O)OC | 28.7 | 24 |
| 247 | 4{179,152,23} | COC(=O)CCC(C)C1=C(NC(CCC(=O)OC)C(=O)OC)N2C=CC(OC)=CC2=N1  c:8,23,27,30                     | Z8801681822 | 1{179} | COc1ccnc( N)c1          | 2{152} | COC(=O)CC C(C)C=O         | 3{23} | COC(=O)CC C([N+]#[C-])C(=O)OC | 27.6 | 23 |
| 248 | 4{158,153,18} | CC(C)(C)NC1=C(N=C2C=NC(=CN12)P(C)(C)=O)C1=CN(CC(F)(F)F)N=N1  c:9,11,28,t:5,7,20            | Z8803896925 | 1{158} | CP(=O)(C)c 1cnc(N)en1   | 2{153} | FC(F)(F)Cn1 cc(C=O)nn1    | 3{18} | CC(C)(C)[N+]#[C-]             | 26.1 | 23 |

|     |               |                                                                                           |             |        |                          |        |                                  |       |                      |      |    |
|-----|---------------|-------------------------------------------------------------------------------------------|-------------|--------|--------------------------|--------|----------------------------------|-------|----------------------|------|----|
| 249 | 4{73,15,9}    | CNC1=C(N=C2C=CC3=NC=CN3N12)C1=CC=C(OC)C=C1  c:6,10,23,t:2,4,8,17,19                       | Z8776690333 | 1{73}  | Nc1ccc2nccn2n1           | 2{15}  | COc1ccc(C=O)cc1                  | 3{9}  | C[N+][C-]            | 18.1 | 23 |
| 250 | 4{167,154,29} | CCOC(=O)CCNC1=C(N=C2N1C(C)=CN=C2C)C1N(CC11CCOCC1)C(=O)OC(C)(C)C  c:10,15,17,t:8           | Z8810902967 | 1{167} | Cc1cnc(C)c(N)n1          | 2{154} | CC(C)(C)OC(=O)N1CC2(CCOCC2)C1C=O | 3{29} | CCOC(=O)C[C[N+][C-]  | 30.0 | 23 |
| 251 | 4{180,155,53} | COC(=O)C1=CC2=NC(=C(NCCOCC3=CC=C(C=C3)N2C=C1C)C1=CN=CN=C1  c:17,19,24,30,32,t:4,6,8,15,28 | Z8803896942 | 1{180} | COC(=O)c1cc(N)ncc1C      | 2{155} | O=Cc1cncnc1                      | 3{53} | [C-][N+]CCOCc1cccc1  | 25.1 | 22 |
| 252 | 4{47,137,6}   | CCOC(=O)CCNC1=C(N=C2C=C(C=CN12)S(N)(=O)=O)C1=C(C)ON=C1C  c:13,15,24,28,t:9,11             | Z8803896968 | 1{47}  | Cl.Nc1cc(ccn1)S(=O)(=O)N | 2{137} | Cc1noc(C)c1C=O                   | 3{6}  | CCOC(=O)C[C[N+][C-]  | 25.0 | 22 |
| 253 | 4{181,77,6}   | CCOC(=O)CCNC1=C(CC2CCCC2)N=C2N1C=CC1=C2N=CC=N1  c:9,18,22,24,27,29                        | Z8784060825 | 1{181} | Nc1nccc2nccnc12          | 2{77}  | O=CCC1CC1                        | 3{6}  | CCOC(=O)C[C[N+][C-]  | 22.6 | 22 |
| 254 | 4{182,14,7}   | CC1=CC=C(C=C1)C1=C(NC2CCOCC2)N2C=C(C=C(I)C2=N1)C(F)(F)F  c:3,5,8,19,25,t:1,21             | Z8797786219 | 1{182} | Nc1ncc(cc1I)C(F)(F)F     | 2{14}  | Cc1ccc(C=O)cc1                   | 3{7}  | [C-][N+]C1CCOCC1     | 29.7 | 22 |
| 255 | 4{183,156,10} | COC1=CC=C(C)N2C(NC3CCOC3)=C(N=C12)C1=C(CI)N=CN1C  c:15,21,24,t:2,4,17                     | Z8801681815 | 1{183} | COc1ccc(C)nc1N           | 2{156} | Cn1cnc(Cl)c1C=O                  | 3{10} | [C-][N+]C1CCOC1      | 21.0 | 21 |
| 256 | 4{184,22,7}   | NC(=S)C1=CN2C(C=C1)=NC(=C2NC1CCOCC1)C1=CC=CC=C1  c:7,9,11,24,26,t:3,22                    | Z8784059422 | 1{184} | NC(=S)c1ccc(N)nc1        | 2{22}  | O=Cc1cccc1                       | 3{7}  | [C-][N+]C1CCOCC1     | 20.1 | 21 |
| 257 | 4{185,26,7}   | CC1=C(C=CC2=NC(CCC3=CC=CC=C3)=C(NC3CCOCC3)N12)S(C)(=O)=O  c:3,12,14,t:1,5,10,16           | Z8776690329 | 1{185} | Cc1nc(N)cc1S(=O)(=O)C    | 2{26}  | O=CCCc1ccc1                      | 3{7}  | [C-][N+]C1CCOCC1     | 23.5 | 21 |
| 258 | 4{46,157,9}   | CNC1=C(N=C2C=CC=CN12)C1=NC2=C(C=C1)N=CC=C2  c:6,8,15,17,20,22,t:2,4,13                    | Z8798985061 | 1{46}  | Nc1ccccn1                | 2{157} | O=Cc1ccc2ncccc2n1                | 3{9}  | C[N+][C-]            | 15.5 | 21 |
| 259 | 4{161,14,26}  | CC1=CC=C(C=C1)C1=C(NCC2=CC=C(F)C=C2)N2N=CC=CC2=N1  c:3,5,8,17,21,23,26,t:1,12,14          | Z8741907011 | 1{161} | Nc1cccnn1                | 2{14}  | Cc1ccc(C=O)cc1                   | 3{26} | Fe1ccc(C[N+][C-])cc1 | 18.6 | 21 |
| 260 | 4{28,158,31}  | CSCCNC1=C(N=C2C=C(C=CN12)C1=NOC=N1)C1=CN(C=C)N=C1  c:9,11,19,27,t:5,7,16,22               | Z8798985032 | 1{28}  | Cl.Nc1cc(ccn1)c2ncon2    | 2{158} | C=Cn1cc(C=O)cn1                  | 3{31} | CSCC[N+][C-]         | 20.0 | 20 |

|     |               |                                                                                                                               |             |        |                                      |        |                                                  |       |                            |      |    |
|-----|---------------|-------------------------------------------------------------------------------------------------------------------------------|-------------|--------|--------------------------------------|--------|--------------------------------------------------|-------|----------------------------|------|----|
| 261 | 4{19,22,7}    | N#CC1=CC=CN2C(NC3CCOCC3)=C(N=C12)C1=CC=CC=C1  c:4,15,23,25,t:2,17,21                                                          | Z8780121582 | 1{19}  | Nc1ncccc1<br>C#N                     | 2{22}  | O=Cc1cccc<br>1                                   | 3{7}  | [C-]<br>#[N+]C1CC<br>OCC1  | 17.2 | 20 |
| 262 | 4{32,58,16}   | CC1=CC=CC(C)=C1NC1=C(N=C2C=C(C=C<br>N12)P(C)(C)=O)C1=NSN=C1<br> c:3,6,14,16,28,t:1,10,12,25                                   | Z8781341783 | 1{32}  | CP(=O)(C)c<br>1ccnc(N)c1             | 2{58}  | O=Cc1cnsn1                                       | 3{16} | Cc1cccc(C)c<br>1[N+]#[C-]  | 21.4 | 20 |
| 263 | 4{38,129,9}   | CNC1=C(N=C2C=C(C=CN12)C#N)C1=CC=C<br>C2=NC=NN12  c:6,8,17,21,t:2,4,15,19                                                      | Z8798985023 | 1{38}  | Nc1cc(C#N<br>)ccn1                   | 2{129} | O=Cc1cccc2<br>ncnn12                             | 3{9}  | C[N+]#[C-]                 | 15.5 | 20 |
| 264 | 4{186,159,1}  | CN(C)S(=O)(=O)C1=CC2=NC(=C(NC3CC3)N<br>2C=C1)C1=NNC2=C1C=CC(F)=C2<br> c:19,25,28,31,t:6,8,10,22                               | Z8810903045 | 1{186} | Cl.CN(C)S(<br>=O)(=O)c1c<br>cnc(N)c1 | 2{159} | Fc1ccc2c(C=<br>O)n[nH]c2c1                       | 3{1}  | [C-]<br>#[N+]C1CC<br>1     | 22.0 | 20 |
| 265 | 4{123,160,49} | CN1N=C(C=C1C1=C(NC2CC(F)(F)C2)N2C=<br>CC(OCCO)=CC2=N1)C1CC1  c:2,4,7,18,24,27                                                 | Z8803896943 | 1{123} | Cl.Nc1cc(O<br>CCO)ccn1               | 2{160} | Cn1nc(cc1C<br>=O)C2CC2                           | 3{49} | FC1(F)CC(C<br>1)[N+]#[C-]  | 21.0 | 19 |
| 266 | 4{97,161,14}  | CCN1C=NC=C1C1=C(NCCOC)N2C=C(F)C=<br>C(C)C2=N1  c:3,5,8,23,t:16,19                                                             | Z8778278036 | 1{97}  | Cc1cc(F)cn<br>c1N                    | 2{161} | CCn1cnc1C<br>=O                                  | 3{14} | COCC[N+]#/<br>C-]          | 16.4 | 19 |
| 267 | 4{46,162,9}   | CNC1=C(N=C2C=CC=CN12)C1=CC(OC)=N<br>C(C)=C1  c:6,8,17,20,t:2,4,13                                                             | Z8810902981 | 1{46}  | Nc1ccccn1                            | 2{162} | COc1cc(C=O<br>)cc(C)n1                           | 3{9}  | C[N+]#[C-]                 | 13.8 | 19 |
| 268 | 4{70,163,22}  | FC1=C(C2=C(NC3COC3)N3C=CN=C(C4CC4<br>)C3=N2)C(I)=CN=C1  c:1,3,12,21,25,27,t:14                                                | Z8801681849 | 1{70}  | Nc1ncncn1<br>C2CC2                   | 2{163} | Fc1cnc(I)c1<br>C=O                               | 3{22} | [C-]<br>#[N+]C1CO<br>C1    | 23.2 | 19 |
| 269 | 4{187,164,46} | CN1N=C(C2=C1CCOC2)C1=C(NCC(C)=C)N<br>2C=C(Cl)C(=CC2=N1)C#N<br> c:2,4,12,23,26,t:20                                            | Z8810903034 | 1{187} | Nc1cc(C#N<br>)c(Cl)cn1               | 2{164} | Cn1nc(C=O)<br>c2COCCc21                          | 3{46} | CC(=C)C[N+]<br>#[C-]       | 19.6 | 19 |
| 270 | 4{188,165,59} | COC(=O)[C@H]1C[C@@H](C1)NIC=CC(=N<br>1)C1=C(NCCC2=CC(F)=CC=C2)N2C(C=NC=<br>C2C(=O)OC)=N1<br> r,c:10,12,15,23,25,30,32,38,t:20 | Z8810902960 | 1{188} | COC(=O)c1<br>cnc(N)n1                | 2{165} | COC(=O)[C<br>@H]1C[C@<br>@H](C1)n2c<br>cc(C=O)n2 | 3{59} | Fc1cccc(CC[<br>N+]#[C-])c1 | 25.2 | 19 |
| 271 | 4{189,44,27}  | CCCCNC1=C(N=C2N1C=CC=C2N(C)C)C1=<br>CN(CC)N=C1  c:7,11,13,24,t:5,19                                                           | Z8797781359 | 1{189} | CN(C)c1ccc<br>nc1N                   | 2{44}  | CCn1cc(C=O<br>)cn1                               | 3{27} | CCCC[N+]#/<br>C-]          | 16.7 | 19 |
| 272 | 4{190,166,12} | C(NC1=C(N=C2C=C3C=CC=CC3=NN12)C1=<br>NC(=CS1)C1CC1)C1CCOC1<br> c:8,10,13,20,t:2,4,6,18                                        | Z8786958851 | 1{190} | Nc1cc2cccc<br>c2nn1                  | 2{166} | O=Cc1nc(es1<br>)C2CC2                            | 3{12} | [C-]<br>#[N+]CC1C<br>COC1  | 19.7 | 19 |
| 273 | 4{186,167,29} | CCOC(=O)CCNC1=C(N=C2C=C(C=CN12)S(<br>=O)(=O)N(C)C)C1=NN=CN1<br> c:12,14,27,t:8,10,25                                          | Z8808559859 | 1{186} | Cl.CN(C)S(<br>=O)(=O)c1c<br>cnc(N)c1 | 2{167} | O=Cc1nnc[n<br>H]1                                | 3{29} | CCOC(=O)C<br>C[N+]#[C-]    | 20.4 | 19 |
| 274 | 4{118,46,25}  | COCCCCC1=C(NCCCF)N2C(C=CC=C2C(C<br>)O)=N1  c:7,16,18,23                                                                       | Z8781341799 | 1{118} | Cl.CC(O)c1<br>cccc(N)n1              | 2{46}  | COCCCCC<br>=O                                    | 3{25} | FCCC[N+]#/<br>C-]          | 16.7 | 18 |

|     |               |                                                                                                |             |        |                         |        |                      |       |                                   |      |    |
|-----|---------------|------------------------------------------------------------------------------------------------|-------------|--------|-------------------------|--------|----------------------|-------|-----------------------------------|------|----|
| 275 | 4{191,168,22} | CC(C)(C)C1=CN2C(NC3COC3)=C(N=C2C=C1)C1=NOC=C1  c:13,15,18,24,t:4,21                            | Z8810902975 | 1{191} | CC(C)(C)c1ccc(N)nc1     | 2{168} | O=Cc1cccon1          | 3{22} | [C-]<br>#[N+]C1CO<br>C1           | 15.3 | 18 |
| 276 | 4{114,40,25}  | COCC1=CC2=NC(=C(NCCCCF)N2C=C1)C1=NC(CO)=CS1  c:16,23,t:3,5,7,19                                | Z8781341790 | 1{114} | COCC1ccnc(N)c1          | 2{40}  | OCc1csc(C=O)n1       | 3{25} | FCCC[N+]#[C-]                     | 16.5 | 17 |
| 277 | 4{157,14,54}  | CC1=CC=C(C=C1)C1=C(NC2=CC=CC=C2)N2C(C=C(C)C=C2Br)=N1  c:3,5,8,13,15,23,26,t:1,11,20            | Z8741907090 | 1{157} | Cc1cc(N)nc(Br)c1        | 2{14}  | Cc1ccc(C=O)cc1       | 3{54} | [C-]<br>#[N+]c1cccc<br>c1         | 18.3 | 17 |
| 278 | 4{192,22,27}  | CCCCNC1=C(N=C2N1C(F)=CC=C2Cl)C1=CC=CC=C1  c:7,12,14,20,22,t:5,18                               | Z8786838535 | 1{192} | Nc1nc(F)cc1Cl           | 2{22}  | O=Cc1cccc1           | 3{27} | CCCC[N+]#[C-]                     | 14.4 | 17 |
| 279 | 4{22,19,13}   | COC1=C(N(C)N=C1)C1=C(NCC2=CC=C(OC)C=C2)N2N=C(Cl)C=CC2=N1  c:6,9,19,26,29,t:2,13,15,23          | Z8798985042 | 1{22}  | Nc1ccc(Cl)nn1           | 2{19}  | COc1cnn(C)c1C=O      | 3{13} | COc1ccc(C[N+]#[C-])cc1            | 18.0 | 17 |
| 280 | 4{193,169,12} | CNC(=O)C1=CN2C(C=C1)=NC(=C2NCC1CCOC1)C1=NNC2=C1N=CC=C2  c:8,10,12,26,29,31,t:4,23              | Z8803896944 | 1{193} | CNC(=O)c1ccc(N)nc1      | 2{169} | O=Cc1n[nH]c2cccnc12  | 3{12} | [C-]<br>#[N+]CC1C<br>COC1         | 16.3 | 15 |
| 281 | 4{73,151,13}  | COC1=CC=C(CNC2=C(N=C3C=CC4=NC=C4N423)C2=CC(C)=NN2)C=C1  c:12,16,26,30,t:2,4,8,10,14,23         | Z8810902952 | 1{73}  | Nc1ccc2nccn2n1          | 2{151} | Cc1cc(C=O)[nH]n1     | 3{13} | COc1ccc(C[N+]#[C-])cc1            | 15.4 | 15 |
| 282 | 4{169,15,13}  | CNC(=O)C1=NN2C(C=C1)=NC(=C2NCC1=C(C=C(OC)C=C1)C1=CC=C(OC)C=C1  c:8,10,12,23,32,t:4,17,19,26,28 | Z8776690339 | 1{169} | CNC(=O)c1ccc(N)nn1      | 2{15}  | COc1ccc(C=O)cc1      | 3{13} | COc1ccc(C[N+]#[C-])cc1            | 16.9 | 15 |
| 283 | 4{194,170,7}  | CCN1N=NC(=N1)C1=C(NC2CCOCC2)N2C=CN=C(N3C=CC=N3)C2=N1  c:3,5,8,19,24,26,30,t:21                 | Z8780122086 | 1{194} | Nc1nccnc1n2cccn2        | 2{170} | CCn1nnc(C=O)n1       | 3{7}  | [C-]<br>#[N+]C1CC<br>OCC1         | 15.1 | 15 |
| 284 | 4{73,19,13}   | COC1=C(N(C)N=C1)C1=C(NCC2=CC=C(OC)C=C2)N2N3C=CN=C3C=CC2=N1  c:6,9,19,24,26,29,32,t:2,13,15     | Z8798985040 | 1{73}  | Nc1ccc2nccn2n1          | 2{19}  | COc1cnn(C)c1C=O      | 3{13} | COc1ccc(C[N+]#[C-])cc1            | 15.8 | 15 |
| 285 | 4{195,118,7}  | CC1=NC=CC(=C1)C1=C(NC2CCOCC2)N2C=C(Br)C=C(NS(C)(=O)=O)C2=N1  c:3,5,8,30,t:1,19,22              | Z8780122346 | 1{195} | CS(=O)(=O)Nc1cc(Br)nc1N | 2{118} | Cc1cc(C=O)ccn1       | 3{7}  | [C-]<br>#[N+]C1CC<br>OCC1         | 18.5 | 14 |
| 286 | 4{196,171,43} | COC1CC(C(OC)O1)C1=C(NC2CCN(CC2)C(=O)OC(C)(C)C)N2C=C(C)C=C(C#N)C2=N1  c:10,36,t:28,31           | Z8808559881 | 1{196} | Cc1cnc(N)c(C#N)c1       | 2{171} | COC1CC(C=O)C(OC)O1   | 3{43} | CC(C)(C)OC(=O)N1CCC(CC1)[N+]#[C-] | 18.5 | 14 |
| 287 | 4{73,172,11}  | BrC1=CC(CNC2=C(N=C3C=CC4=NC=CN4N23)C2=CNC(=N2)C2CC2)=CC=C1  c:10,14,24,30,32,t:1,6,8,12,21     | Z8808559861 | 1{73}  | Nc1ccc2nccn2n1          | 2{172} | O=Cc1c[nH]c(n1)C2CC2 | 3{11} | Br1cccc(C[N+]#[C-])c1             | 16.9 | 14 |



|     |               |                                                                                                       |             |        |                            |        |                             |       |                           |      |    |
|-----|---------------|-------------------------------------------------------------------------------------------------------|-------------|--------|----------------------------|--------|-----------------------------|-------|---------------------------|------|----|
| 288 | 4{197,29,45}  | CCN1C=CC(=N1)C1=C(NCC=C)N2C=C(C=C<br>C2=N1)S(=O)(=O)CC(C)C  c:3,5,8,15,17,20                          | Z8786958927 | 1{197} | CC(C)CS(=O)(=O)c1ccc(N)nc1 | 2{29}  | CCn1ccc(C=O)n1              | 3{45} | C=CC[N+]#[C-]             | 14.2 | 14 |
| 289 | 4{180,173,15} | CCNC1=C(N=C2C=C(C(=O)OC)C(C)=CN12)<br>C1=NC(=NN1C)C(F)(F)F  c:14,21,t:3,5,7,19                        | Z8810902977 | 1{180} | COC(=O)c1ccc(N)nc1C        | 2{173} | Cn1nc(nc1C=O)C(F)(F)F       | 3{15} | CC[N+]#[C-]               | 13.5 | 13 |
| 290 | 4{198,174,31} | CSCCNC1=C(N=C2C=NC(C#C)=C(Cl)N12)C<br>1=CN(CC2CCCO2)N=N1  c:9,29,t:5,7,13,19                          | Z8801681832 | 1{198} | Ne1cnc(C#C)c(Cl)n1         | 2{174} | O=Cc1cn(CC2CCCO2)nn1        | 3{31} | CSCC[N+]#[C-]             | 14.3 | 13 |
| 291 | 4{113,170,7}  | CCN1N=NC(=N1)C1=C(NC2CCOCC2)N2C=<br>CC=C(N3CCOCC3)C2=N1  c:3,5,8,19,31,t:21                           | Z8784060348 | 1{113} | Ne1ncccc1N2CCOCC2          | 2{170} | CCn1nnc(C=O)n1              | 3{7}  | [C-]<br>#[N+]C1CCOCC1     | 13.0 | 12 |
| 292 | 4{79,109,9}   | CNC1=C(N=C2C=NC=C(C)N12)C1=NN(C)C<br>=C1C  c:6,18,t:2,4,8,14                                          | Z8803896951 | 1{79}  | Cc1cnc(N)n1                | 2{109} | Cc1cn(C)nc1C=O              | 3{9}  | C[N+]#[C-]                | 8.4  | 12 |
| 293 | 4{194,175,60} | COC(=O)C1=CC(NC2=C(N=C3N2C=CN=C3<br>N2C=CC=N2)C2=NNC=C2)=CC=C1<br> c:10,14,16,20,22,28,30,32,t:4,8,25 | Z8803896952 | 1{194} | Ne1ncnc1n2ccn2             | 2{175} | O=Cc1cc[nH]n1               | 3{60} | COC(=O)c1ccc([N+]#[C-])c1 | 12.9 | 12 |
| 294 | 4{104,176,12} | COC(=O)C1=C(Cl)SC(=C1)C1=C(NCC2CCO<br>C2)N2C(C=CC3=C2COCC3)=N1<br> c:4,8,11,23,25,32                  | Z8810902978 | 1{104} | Ne1ccc2CCOCe2n1            | 2{176} | COC(=O)c1cc(C=O)sc1Cl       | 3{12} | [C-]<br>#[N+]CC1C<br>COC1 | 13.6 | 11 |
| 295 | 4{199,77,6}   | CCOC(=O)CCNC1=C(CC2CCCC2)N=C2N1<br>C=CC=C2C(C)(F)F  c:9,18,22,24                                      | Z8797784767 | 1{199} | CC(F)(F)c1ccnc1N           | 2{77}  | O=CCC1CC<br>CC1             | 3{6}  | CCOC(=O)C<br>CC[N+]#[C-]  | 12.0 | 11 |
| 296 | 4{200,15,9}   | CNC1=C(N=C2C=C(C)C=C(OC)N12)C1=CC<br>=C(OC)C=C1  c:22,t:2,4,6,9,16,18                                 | Z8776690326 | 1{200} | Cl.COC1cc(C)cc(N)n1        | 2{15}  | COc1ccc(C=O)cc1             | 3{9}  | C[N+]#[C-]                | 9.0  | 11 |
| 297 | 4{201,108,5}  | COCCNC1=C(N=C2C=C(C=CN12)C(F)(F)F<br>)C1=CN=C(N=C1)N1CCOCC1<br> c:10,12,23,25,t:6,8,21                | Z8803896939 | 1{201} | Ne1cc(ccn1)C(F)(F)F        | 2{108} | O=Cc1cnc(nc1)N2CCOC<br>C2   | 3{5}  | COCCC[N+]#[C-]            | 12.9 | 11 |
| 298 | 4{161,98,6}   | CCOC(=O)CCNC1=C(N=C2C=CC=NN12)C<br>1=NC=C(OC)N=C1  c:13,15,26,t:9,11,20,22                            | Z8801681809 | 1{161} | Ne1cccenn1                 | 2{98}  | COc1cnc(C=O)en1             | 3{6}  | CCOC(=O)C<br>CC[N+]#[C-]  | 10.3 | 11 |
| 299 | 4{135,130,32} | CCCC1=NC=CN2C(NC3CCC3)=C(N=C12)C1<br>=NN=C(OC)C=C1  c:5,14,26,t:3,16,20,22                            | Z8801681840 | 1{135} | CCCc1ncnc1N                | 2{130} | COc1ccc(C=O)nn1             | 3{32} | [C-]<br>#[N+]C1CC<br>C1   | 9.8  | 11 |
| 300 | 4{179,177,5}  | COCCNC1=C(CC2CC(C2)C(=O)OC)N=C2C<br>=C(OC)C=CN12  c:6,24,t:18,20                                      | Z8808559865 | 1{179} | COc1cnc(N)c1               | 2{177} | COC(=O)C1<br>CC(CC=O)C<br>1 | 3{5}  | COCCC[N+]#[C-]            | 10.3 | 11 |

|     |               |                                                                                         |             |        |                         |        |                           |       |                           |      |    |
|-----|---------------|-----------------------------------------------------------------------------------------|-------------|--------|-------------------------|--------|---------------------------|-------|---------------------------|------|----|
| 301 | 4{202,69,14}  | COCCNC1=C(N=C2N1C=C(Br)C=C2C(C)(C)C)C1=NN(C)C(C)=C1  c:7,14,26,t:5,11,21                | Z8780122084 | 1{202} | CC(C)(C)c1cc(Br)enc1N   | 2{69}  | Cc1cc(C=O)nn1C            | 3{14} | COCC[N+]#[C-]             | 11.8 | 10 |
| 302 | 4{123,178,22} | COC1=CC2=C(OC(=C2)C2=C(NC3COC3)N3C=CC(OCCO)=CC3=N2)C=C1  c:7,10,19,25,28,31,t:2,4       | Z8810903015 | 1{123} | Cl.Nc1cc(OCCO)ccn1      | 2{178} | COc1ccc2oc(C=O)cc2c1      | 3{22} | [C-]#[N+]C1CO C1          | 10.9 | 10 |
| 303 | 4{101,179,14} | COCCNC1=C(N=C2N1C=C(CO)C=C2C1)C1=CC=C(OC2CCOC2)C=C1  c:7,15,30,t:5,11,19,21             | Z8801681830 | 1{101} | Nc1ncc(CO)cc1Cl         | 2{179} | O=Cc1ccc(O C2CCOC2)cc1    | 3{14} | COCC[N+]#[C-]             | 11.5 | 10 |
| 304 | 4{78,180,2}   | CC1=CN2N3C(C=C(C)C2=N1)=NC(CCCCCF)=C3NC1=CC=C(F)C=C1  c:10,12,20,29,t:1,6,24,26         | Z8808559869 | 1{78}  | Cc1en2nc(N)cc(C)c2n1    | 2{180} | FCCCCC=O                  | 3{2}  | Fc1ccc([N+]#[C-])cc1      | 10.0 | 10 |
| 305 | 4{203,22,14}  | COCCNC1=C(N=C2N1C1=C(C=CC=C1)N=C2N1CCCC1)C1=CC=CC=C1  c:7,13,15,18,29,31,t:5,11,27      | Z8797783649 | 1{203} | Nc1nc2ccc c2nc1N3CC CC3 | 2{22}  | O=Cc1cccc1                | 3{14} | COCC[N+]#[C-]             | 9.8  | 9  |
| 306 | 4{73,181,13}  | COC1=CC=C(CNC2=C(N=C3C=CC4=NC=C4N23)C2=CN=C3CCCN23)C=C1  c:12,16,33,t:2,4,8,10,14,23,25 | Z8801681846 | 1{73}  | Nc1ccc2ncc n2n1         | 2{181} | O=Cc1cnc2C CCn12          | 3{13} | COc1ccc(C[ N+]#[C-])cc1   | 9.7  | 9  |
| 307 | 4{73,19,58}   | COC1=C(N(C)N=C1)C1=C(NC2(C)CC2)N2N3C=CN=C3C=CC2=N1  c:6,9,19,21,24,27,t:2               | Z8781341775 | 1{73}  | Nc1ccc2ncc n2n1         | 2{19}  | COc1cnn(C) c1C=O          | 3{58} | CC1(CC1)[N+]#[C-]         | 8.0  | 9  |
| 308 | 4{204,14,27}  | CCCCNC1=C(N=C2N1C=CC(Cl)=C2I)C1=CC=C(C)C=C1  c:7,11,14,23,t:5,18,20                     | Z8786897242 | 1{204} | Nc1nccc(Cl)c1I          | 2{14}  | Cc1ccc(C=O)cc1            | 3{27} | CCCC[N+]#[C-]             | 10.1 | 8  |
| 309 | 4{145,182,37} | COC(=O)C1CC(C1)NC1=C(N=C2C=CC=C(N12)S(C)(=O)=O)C1=NC=CN1CC#C  c:14,16,27,t:10,12,25     | Z8781341787 | 1{145} | CS(=O)(=O)c1cccc(N)n1   | 2{182} | O=Cc1cncn1 CC#C           | 3{37} | COC(=O)C1 CC(C1)[N+]#[C-] | 9.3  | 8  |
| 310 | 4{169,49,13}  | CNC(=O)C1=NN2C(NCC3=CC=C(OC)C=C3)=C(N=C2C=C1)C1=CN=C1C  c:16,18,20,23,29,t:4,10,12,26   | Z8808559891 | 1{169} | CNC(=O)c1ccc(N)nn1      | 2{49}  | Cc1n[nH]cc1 C=O           | 3{13} | COc1ccc(C[ N+]#[C-])cc1   | 8.0  | 8  |
| 311 | 4{205,9,27}   | CCCCNC1=C(N=C2N1C=CN=C2C#C)C1=CS C=C1  c:7,11,13,21,t:5,18                              | Z8778277313 | 1{205} | Nc1ncnc1 C#C            | 2{9}   | O=Cc1ccsc1                | 3{27} | CCCC[N+]#[C-]             | 5.8  | 7  |
| 312 | 4{124,183,12} | COC(=O)C(C)OC1=CC=C(C=C1)C1=C(NCC2CCOC2)N2C=CC=C(CO)C2=N1  c:9,11,14,25,32,t:7,27       | Z8798985043 | 1{124} | Nc1ncccc1 CO            | 2{183} | COC(=O)C(C)Oc1ccc(C=O)cc1 | 3{12} | [C-]#[N+]CC1C COC1        | 8.2  | 7  |
| 313 | 4{206,80,6}   | CCOC(=O)CCCNC1=C(N=C2N1C=CC(I)=C2F)C1=NC=C(C)S1  c:11,15,18,t:9,22,24                   | Z8786849399 | 1{206} | Nc1nccc(I)c1F           | 2{80}  | Cc1enc(C=O)s1             | 3{6}  | CCOC(=O)C CC[N+]#[C-]     | 9.4  | 7  |

|     |               |                                                                                                   |             |        |                                |        |                            |       |                            |     |   |
|-----|---------------|---------------------------------------------------------------------------------------------------|-------------|--------|--------------------------------|--------|----------------------------|-------|----------------------------|-----|---|
| 314 | 4{106,22,54}  | COC1=NN2C(C=C1)=NC(=C2NC1=CC=CC=C1)C1=CC=CC=C1<br> c:6,8,10,16,18,23,25,t:2,14,21                 | Z8741907033 | 1{106} | COc1ccc(N)nn1                  | 2{22}  | O=Cc1cccc1                 | 3{54} | [C-]<br>#[N+]c1cccc1       | 6.0 | 7 |
| 315 | 4{207,184,14} | COCCNC1=C(N=C2C=CC(=CN12)N1CCN(C1)C(=O)C1CC1)C1CC1  c:9,11,t:5,7                                  | Z8780122426 | 1{207} | Nc1ccc(en1)N2CCN(C2)C(=O)C3CC3 | 2{184} | O=CC1CC1                   | 3{14} | COCC[N+]#[C-]              | 7.1 | 7 |
| 316 | 4{137,58,13}  | COC1=CC=C(CNC2=C(N=C3C=CC(C)=NN23)C2=NSN=C2)C=C1<br> c:12,15,23,26,t:2,4,8,10,20                  | Z8798985035 | 1{137} | Cc1ccc(N)nn1                   | 2{58}  | O=Cc1cnsn1                 | 3{13} | COc1ccc(C[N+]#[C-])cc1     | 6.4 | 7 |
| 317 | 4{208,94,6}   | CCOC(=O)CCCN1=C(N=C2N1C=CN=C2OC1CCCC1)C1=NC=CN=C1<br> c:11,15,17,29,31,t:9,27                     | Z8778277288 | 1{208} | Nc1cncnc1OC2CCCC2              | 2{94}  | O=Cc1cncn1                 | 3{6}  | CCOC(=O)CC[N+]#[C-]        | 7.1 | 6 |
| 318 | 4{209,40,17}  | OCC1=CSC(=N1)C1=C(NCC2CCOCC2)N2C=CC=C(N3CCCC3)C2=N1<br> c:5,8,20,32,t:2,22                        | Z8784060440 | 1{209} | Nc1cncnc1N2CCCC2               | 2{40}  | OCc1csc(C=O)n1             | 3{17} | [C-]<br>#[N+]CC1C<br>COCC1 | 7.3 | 6 |
| 319 | 4{161,15,13}  | COC1=CC=C(CNC2=C(N=C3C=CC=NN23)C2=CC=C(OC)C=C2)C=C1<br> c:12,14,25,28,t:2,4,8,10,19,21            | Z8776690334 | 1{161} | Nc1ccenn1                      | 2{15}  | COc1ccc(C=O)cc1            | 3{13} | COc1ccc(C[N+]#[C-])cc1     | 6.2 | 6 |
| 320 | 4{210,185,34} | CN1C=NC(=C1)C1=C(NCC2CCCO2)N2C(=N1)C(Br)=CC=C2F  c:2,4,7,18,22,24                                 | Z8810903013 | 1{210} | Nc1nc(F)cc1Br                  | 2{185} | Cn1cnc(C=O)c1              | 3{34} | [C-]<br>#[N+]CC1C<br>CCO1  | 6.6 | 6 |
| 321 | 4{169,53,13}  | CNC(=O)C1=NN2C(C=C1)=NC(=C2NCC1=C=C(OC)C=C1)C1=C(F)C=CC(C)=N1<br> c:8,10,12,23,26,29,32,t:4,17,19 | Z8803896966 | 1{169} | CNC(=O)c1ccc(N)nn1             | 2{53}  | Cc1ccc(F)c(C=O)n1          | 3{13} | COc1ccc(C[N+]#[C-])cc1     | 7.0 | 6 |
| 322 | 4{211,59,34}  | COC1=C(Br)C=C(C=N1)C1=C(NCC2CCCO2)N2C=CC=C(C3=NN=NN3)C2=N1<br> c:2,5,7,10,21,27,32,t:23,25        | Z8808559885 | 1{211} | Nc1cncnc1c2n[nH]2              | 2{59}  | COc1ncc(C=O)cc1Br          | 3{34} | [C-]<br>#[N+]CC1C<br>CCO1  | 7.7 | 6 |
| 323 | 4{104,186,12} | FC1=C2SC(=NC2=CC=C1)C1=C(NCC2CCOC2)N2C(C=CC3=C2COCC3)=N1<br> c:1,4,7,9,12,24,26,33                | Z8810902982 | 1{104} | Nc1ccc2CCOCc2n1                | 2{186} | Fe1cccc2nc(C=O)sc12        | 3{12} | [C-]<br>#[N+]CC1C<br>COC1  | 7.0 | 6 |
| 324 | 4{212,187,49} | CCOC(=O)C1=NC(=C2C=CC=CN12)C1=C(NC2CC(F)(F)C2)N2C=C(COC)C=CC2=N1<br> c:9,11,16,32,35,t:5,7,27     | Z8803896960 | 1{212} | Cl.COCc1ccc(N)nc1              | 2{187} | CCOC(=O)c1nc(C=O)c2ccccn12 | 3{49} | FC1(F)CC(C1)[N+]#[C-]      | 7.2 | 6 |
| 325 | 4{213,15,9}   | CNC1=C(N=C2N1C(OC)=CC=C2F)C1=CC=C(OC)C=C1  c:4,10,12,22,t:2,16,18                                 | Z8776690311 | 1{213} | COc1ccc(F)c(N)n1               | 2{15}  | COc1ccc(C=O)cc1            | 3{9}  | C[N+]#[C-]                 | 4.5 | 5 |

|     |               |                                                                                                               |             |        |                                       |        |                                     |       |                             |     |   |
|-----|---------------|---------------------------------------------------------------------------------------------------------------|-------------|--------|---------------------------------------|--------|-------------------------------------|-------|-----------------------------|-----|---|
| 326 | 4{214,188,12} | <chem>COC1=CC(Br)=C(C)N2C(NCC3CCOC3)=C(CCC3(CC3)C#N)N=C12</chem>  t:2,5,17,27                                 | Z8798985054 | 1{214} | <chem>COc1cc(Br)c(C)nc1N</chem>       | 2{188} | <chem>O=CCCC1(C1)C#N</chem>         | 3{12} | [C-]#[N+]CC1COC1            | 6.4 | 5 |
| 327 | 4{215,84,7}   | <chem>CSCCC1=C(NC2CCOCC2)N2N=C(Cl)C=C(C)C2=N1</chem>  c:4,22,t:15,18                                          | Z8778278037 | 1{215} | <chem>Cl.Cc1cc(Cl)nn1N</chem>         | 2{84}  | <chem>CSCCC=O</chem>                | 3{7}  | [C-]#[N+]C1CCOCC1           | 4.7 | 5 |
| 328 | 4{156,103,47} | <chem>CC(C)NC1=C(N=C2N1C(Cl)=CC=C2Cl)C1CC2(COC2)OC1</chem>  c:6,11,13,t:4                                     | Z8810903010 | 1{156} | <chem>Nc1nc(Cl)ccc1Cl</chem>          | 2{103} | <chem>O=CC1CCC2(COC2)OC1</chem>     | 3{47} | CC(C)[N+]#[C-]              | 4.5 | 4 |
| 329 | 4{47,118,14}  | <chem>COCCNC1=C(N=C2C=C(C=CN12)S(N)(=O)=O)C1=CC(C)=NC=C1</chem>  c:9,11,23,25,t:5,7,20                        | Z8784059519 | 1{47}  | <chem>Cl.Nc1cc(ccn1)S(=O)(=O)N</chem> | 2{118} | <chem>Cc1cc(C=O)ccn1</chem>         | 3{14} | COCC[N+]#[C-]               | 4.3 | 4 |
| 330 | 4{198,189,31} | <chem>CSCCNC1=C(N=C2C=NC(C#C)=C(Cl)N12)C1=CN(N=N1)C1CCOCC1</chem>  c:9,22,t:5,7,13,19                         | Z8801681831 | 1{198} | <chem>Nc1cnc(C#C)c(Cl)n1</chem>       | 2{189} | <chem>O=Cc1cn(nn1)C2CCOCC2</chem>   | 3{31} | CSCC[N+]#[C-]               | 4.7 | 4 |
| 331 | 4{73,161,20}  | <chem>CCN1C=NC=C1C1=C(NC2=C(C)C=C(OC)C=C2)N2N3C=CN=C3C=CC2=N1</chem>  c:3,5,8,11,18,23,25,28,31,t:14          | Z8801681850 | 1{73}  | <chem>Nc1ccc2nccn2n1</chem>           | 2{161} | <chem>CCn1cnc1C=O</chem>            | 3{20} | COc1ccc([N+]#[C-])c(C)c1    | 4.3 | 4 |
| 332 | 4{216,190,10} | <chem>CC1=CC2=NC(C3=CC(=NN3)C3=NC=CC=C3)=C(NC3CCOC3)N2N=C1C</chem>  c:8,14,16,29,t:1,3,6,12,18                | Z8801681808 | 1{216} | <chem>Cc1cc(N)nn1C</chem>             | 2{190} | <chem>O=Cc1cc(n[nH]1)c2cccn2</chem> | 3{10} | [C-]#[N+]C1CCOC1            | 4.1 | 4 |
| 333 | 4{217,14,7}   | <chem>CN1C(=O)NC2=C1C=CN1C(NC3CCOCC3)=C(N=C21)C1=CC=C(C)C=C1</chem>  c:5,8,19,30,t:21,25,27                   | Z8784060908 | 1{217} | <chem>Cn1c(=O)[nH]e2c(N)nc1c2</chem>  | 2{14}  | <chem>Cc1ccc(C=O)cc1</chem>         | 3{7}  | [C-]#[N+]C1CCOCC1           | 3.9 | 4 |
| 334 | 4{218,34,61}  | <chem>CC(C)(C)OC(=O)NCCCNC1=C(N=C2C=CC(=NN12)C(C)(C)C)C1=CC=C(C=C1)P(C)(C)=O</chem>  c:16,18,29,31,t:12,14,27 | Z8803896931 | 1{218} | <chem>CC(C)(C)c1ccc(N)nn1</chem>      | 2{34}  | <chem>CP(=O)(C)c1ccc(C=O)cc1</chem> | 3{61} | CC(C)(C)OC(=O)NCCC[N+]#[C-] | 5.1 | 4 |
| 335 | 4{219,14,27}  | <chem>CCCCNC1=C(N=C2N1C=C(Br)C1=C2N=CC=C1)C1=CC=C(C)C=C1</chem>  c:7,14,17,19,27,t:5,11,22,24                 | Z8797778731 | 1{219} | <chem>Nc1ncc(Br)c2ccnc12</chem>       | 2{14}  | <chem>Cc1ccc(C=O)cc1</chem>         | 3{27} | CCCC[N+]#[C-]               | 4.1 | 4 |
| 336 | 4{220,191,7}  | <chem>CCN1C=NN=C1C1=C(NC2CCOCC2)N2C=C=C(C3CC3)C2=N1</chem>  c:3,5,8,19,28,t:21                                | Z8803896959 | 1{220} | <chem>Cl.Nc1nccc1C2CC2</chem>         | 2{191} | <chem>CCn1cnc1C=O</chem>            | 3{7}  | [C-]#[N+]C1CCOCC1           | 3.5 | 4 |
| 337 | 4{38,58,9}    | <chem>CNC1=C(N=C2C=C(C=CN12)C#N)C1=NSN=C1</chem>  c:6,8,18,t:2,4,15                                           | Z8786958823 | 1{38}  | <chem>Nc1cc(C#N)ccn1</chem>           | 2{58}  | <chem>O=Cc1cnsn1</chem>             | 3{9}  | C[N+]#[C-]                  | 2.6 | 4 |
| 338 | 4{221,192,14} | <chem>COCCNC1=C(N=C2N1C(C)=CC=C2C#N)C1=NC(OC)=CC=C1</chem>  c:7,12,14,23,25,t:5,19                            | Z8798985058 | 1{221} | <chem>Cc1ccc(C#N)c(N)n1</chem>        | 2{192} | <chem>COc1cccc(C=O)n1</chem>        | 3{14} | COCC[N+]#[C-]               | 3.3 | 4 |

|     |               |                                                                                                                                 |             |        |                       |        |                        |       |                                                  |     |   |
|-----|---------------|---------------------------------------------------------------------------------------------------------------------------------|-------------|--------|-----------------------|--------|------------------------|-------|--------------------------------------------------|-----|---|
| 339 | 4{161,27,13}  | COC1=CC=C(CNC2=C(N=C3C=CC=NN23)C2=NN(C)C(C)=N2)C=C1<br> c:12,14,24,27,t:2,4,8,10,19                                             | Z8786958899 | 1{161} | Nc1cccnn1             | 2{27}  | Cc1nc(C=O)nn1C         | 3{13} | COc1ccc(C[N+]#[C-])cc1                           | 3.4 | 4 |
| 340 | 4{222,193,62} | COC(=O)C1=CN2C(NC3(CCCC3)C(=O)OC)=C(N=C2C=N1)C1=NN2CCCCOC2=C1<br> c:18,20,23,35,t:4,26                                          | Z8808559886 | 1{222} | Cl.COC(=O)c1cnc(N)cn1 | 2{193} | O=Cc1cc2OCCCCn2n1      | 3{62} | COC(=O)C1(CCCC1)[N+]#[C-]                        | 4.3 | 4 |
| 341 | 4{24,26,14}   | COCCNC1=C(CCC2=CC=CC=C2)N=C2N1C=CN=C2C1  c:5,11,13,16,20,22,t:9                                                                 | Z8741907130 | 1{24}  | Nc1ncnc1Cl            | 2{26}  | O=CCc1ccc1             | 3{14} | COCC[N+]#[C-]                                    | 3.2 | 4 |
| 342 | 4{223,194,29} | CCOC(=O)CCNC1=C(N=C2C=CC(=NN12)C(N)=O)C1=CC=C(N1C)C(=O)OC<br> c:12,14,24,t:8,10,22                                              | Z8798985052 | 1{223} | NC(=O)c1ccc(N)nn1     | 2{194} | COC(=O)c1ccc(C=O)nn1C  | 3{29} | CCOC(=O)C[N+]#[C-]                               | 3.9 | 4 |
| 343 | 4{161,94,11}  | BrC1=CC(CNC2=C(N=C3C=CC=NN23)C2=N=C=CN=C2)=CC=C1<br> c:10,12,19,21,23,25,t:1,6,8,17                                             | Z8803896956 | 1{161} | Nc1cccnn1             | 2{94}  | O=Cc1cncn1             | 3{11} | Br1cccc(C[N+]#[C-])c1                            | 3.6 | 3 |
| 344 | 4{224,95,63}  | CN(C)C1=NC=CC(=C1)C1=C(NCC(F)F)N2N=C(C=CC2=N1)C1CC1  c:5,7,10,18,20,23,t:3                                                      | Z8781341778 | 1{224} | Nc1ccc(nn1)C2CC2      | 2{95}  | CN(C)c1cc(C=O)ccn1     | 3{63} | FC(F)C[N+]#[C-]                                  | 3.2 | 3 |
| 345 | 4{225,195,27} | CCCCNC1=C(N=C2C=C(Cl)C=NN12)C1=CC(F)=C(OC)N=C1  c:12,24,t:5,7,9,17,20                                                           | Z8778278044 | 1{225} | Nc1cc(Cl)ccnn1        | 2{195} | COc1ncc(C=O)cc1F       | 3{27} | CCCC[N+]#[C-]                                    | 3.0 | 3 |
| 346 | 4{226,97,17}  | CC(C)(C)C1=CC=CC2=NC(=C(NCC3CCOCC3)N12)C1=CC=C(F)C=C1<br> c:6,29,t:4,8,10,24,26                                                 | Z8784060117 | 1{226} | CC(C)(C)c1cccc(N)n1   | 2{97}  | Fc1ccc(C=O)cc1         | 3{17} | [C-]#[N+]CC1C COCC1                              | 3.2 | 3 |
| 347 | 4{227,135,47} | CC(C)NC1=C(N=C2C=NC(Br)=C(Cl)N12)C1=C(C)N(C)N=C1C  c:8,17,22,t:4,6,11                                                           | Z8810903047 | 1{227} | Nc1enc(Br)c(Cl)n1     | 2{135} | Cc1nn(C)c(C)c1C=O      | 3{47} | CC(C)[N+]#[C-]                                   | 3.2 | 3 |
| 348 | 4{228,14,7}   | CC1=CC=C(C=C1)C1=C(NC2CCOCC2)N2C=CN3C=CN=C3C2=N1  c:3,5,8,19,22,24,28,t:1                                                       | Z8778277397 | 1{228} | Nc1ncn2ccnc12         | 2{14}  | Cc1ccc(C=O)cc1         | 3{7}  | [C-]#[N+]C1CC OCC1                               | 2.6 | 3 |
| 349 | 4{229,196,64} | COC(=O)[C@@H]1CC[C@@H](C1)NC1=C(N=C2C=CC(=CN12)S(O)(=O)=O)C1=C(C)C=C(C=C1)N1C=CN=C1<br> &1:4,7,r,c:15,17,26,29,31,35,37,t:11,13 | Z8810903023 | 1{229} | Nc1ccc(en1)S(=O)(=O)O | 2{196} | Cc1ccc(ccc1C=O)n2ccnc2 | 3{64} | COC(=O)[C@@H]1CC[C@@H](C1)[N+]#[C-]<br> &1:4,7,r | 3.4 | 3 |
| 350 | 4{176,197,14} | COCCNC1=C(N=C2N1C=CN=C2N1CCCC1)C1=NN(C)C(=C1)C(=O)OC<br> c:7,11,13,26,t:5,22                                                    | Z8798985046 | 1{176} | Nc1ncnc1N2CCCC2       | 2{197} | COC(=O)c1ccc(C=O)nn1C  | 3{14} | COCC[N+]#[C-]                                    | 2.4 | 2 |
| 351 | 4{230,198,34} | CCC1=NN(C)C=C1C1=C(NCC2CCCO2)N2C=C(Br)C=C(C(C)O)C2=N1  c:6,9,29,t:2,20,23                                                       | Z8810902957 | 1{230} | CC(O)c1cc(Br)cn1N     | 2{198} | CCc1nn(C)cc1C=O        | 3{34} | [C-]#[N+]CC1C COO1                               | 2.6 | 2 |

|     |               |                                                                                                                |             |        |                       |        |                        |       |                                                  |     |   |
|-----|---------------|----------------------------------------------------------------------------------------------------------------|-------------|--------|-----------------------|--------|------------------------|-------|--------------------------------------------------|-----|---|
| 352 | 4{231,63,37}  | COCN1N=CC=C1C1=C(NC2CC(C2)C(=O)O)C)N2N=C(C=CC2=N1)C(F)(F)F<br> c:4,6,9,22,24,27                                | Z8781341773 | 1{231} | Nc1ccc(nn1)C(F)(F)F   | 2{63}  | COCn1nccc1<br>C=O      | 3{37} | COC(=O)C1<br>CC(C1)[N+]<br>#[C-]                 | 2.4 | 2 |
| 353 | 4{232,41,17}  | COC1=CC=NN2C(NCC3CCOCC3)=C(N=C12)C1=NC=CC=C1  c:4,16,24,26,t:2,18,22                                           | Z8778277287 | 1{232} | COc1ccnnc1N           | 2{41}  | O=Cc1cccc1             | 3{17} | [C-]<br>#[N+]CC1C<br>COCC1                       | 1.8 | 2 |
| 354 | 4{233,97,27}  | CCCCN1=C(N=C2N1C=C(Cl)C(Cl)=C2Cl)C1=CC=C(F)C=C1  c:7,15,24,t:5,11,19,21                                        | Z8780122034 | 1{233} | Nc1ncc(Cl)c(Cl)c1Cl   | 2{97}  | Fc1ccc(C=O)cc1         | 3{27} | CCCC[N+]#[C-]                                    | 2.0 | 2 |
| 355 | 4{234,199,10} | O=C1N(CC2=C(NC3CCOC3)N3C=CN=C(OC4CCC4)C3=N2)C(=O)C2=C1C=CC=C2<br> c:4,14,25,30,33,35,t:16                      | Z8810903007 | 1{234} | Nc1ncnc1OC2CCC2       | 2{199} | O=CCN1C(=O)c2cccc2C1=O | 3{10} | [C-]<br>#[N+]C1CC<br>OC1                         | 2.2 | 2 |
| 356 | 4{128,200,23} | COCCN(C)C1=CN2C(C=C1)=NC(CCCC#CC)=C2NC(CCC(=O)OC)C(=O)OC  c:10,12,20,t:6                                       | Z8808559870 | 1{128} | COCCN(C)c1ccc(N)nc1   | 2{200} | CC#CCCC=O              | 3{23} | COC(=O)CC<br>C([N+]#[C-])C(=O)OC                 | 1.6 | 1 |
| 357 | 4{229,201,64} | COC(=O)[C@@H]1CC[C@@H](C1)NC1=C(N=C2C=CC(=CN12)S(O)(=O)=O)C1=CC(F)=C(C)C=C1  &1:4,7,r,c:15,17,32,t:11,13,26,29 | Z8803896930 | 1{229} | Nc1ccc(en1)S(=O)(=O)O | 2{201} | Cc1ccc(C=O)cc1F        | 3{64} | COC(=O)[C@@H]1CC[C@@H](C1)[N+]#[C-]<br> &1:4,7,r | 1.4 | 1 |
| 358 | 4{235,77,27}  | CCCCN1=C(CC2CCCC2)N=C2N1C=CC1=C2C=CC=C1  c:5,14,18,20,23,25                                                    | Z8797776760 | 1{235} | Nc1nccc2ccc12         | 2{77}  | O=CCC1CC<br>CC1        | 3{27} | CCCC[N+]#[C-]                                    | 0.0 | 0 |
| 359 | 4{236,94,6}   | CCOC(=O)CCCN1=C(N=C2N1C=CC1=C2C=NC=C1)C1=NC=CN=C1<br> c:11,15,17,20,22,27,29,t:9,25                            | Z8797775788 | 1{236} | Nc1nccc2ccncc12       | 2{94}  | O=Cc1cncn1             | 3{6}  | CCOC(=O)C<br>CC[N+]#[C-]                         | 0.0 | 0 |
| 360 | 4{237,58,14}  | COCCN1=C(N=C2C=C3C=CC=C(Br)C3=CN12)C1=NSN=C1  c:11,17,25,t:5,7,9,13,22                                         | Z8797774930 | 1{237} | Nc1cc2cccc(Br)c2cn1   | 2{58}  | O=Cc1cnsn1             | 3{14} | COCC[N+]#[C-]                                    | 0.0 | 0 |
| 361 | 4{23,202,21}  | FC1=CN=CC(F)=C1C1=C(NCC2CC2)N2C(C=NC=C2Br)=N1  c:3,6,9,19,21,24,t:1                                            | Z8808559895 | 1{23}  | Nc1cnc(Br)n1          | 2{202} | Fc1cnc(F)c1C=O         | 3{21} | [C-]<br>#[N+]CC1C<br>C1                          | 0.0 | 0 |
| 362 | 4{238,203,6}  | CCOC(=O)CCCN1=C(N=C2N1C=CC(OC)=C2C#N)C1=NN(CC(F)F)C=C1<br> c:11,15,19,31,t:9,24                                | Z8808559887 | 1{238} | COc1cnc(N)c1C#N       | 2{203} | FC(F)Cn1ccc(C=O)n1     | 3{6}  | CCOC(=O)C<br>CC[N+]#[C-]                         | 0.0 | 0 |
| 363 | 4{184,204,7}  | CSC1=NC=C(N1C)C1=C(NC2CCOCC2)N2C=C(C=CC2=N1)C(N)=S  c:4,9,20,22,25,t:2                                         | Z8808559884 | 1{184} | NC(=S)c1ccc(N)nc1     | 2{204} | CSc1ncc(C=O)n1C        | 3{7}  | [C-]<br>#[N+]C1CC<br>OCC1                        | 0.0 | 0 |

|     |               |                                                                                                           |             |        |                          |        |                              |       |                          |     |   |
|-----|---------------|-----------------------------------------------------------------------------------------------------------|-------------|--------|--------------------------|--------|------------------------------|-------|--------------------------|-----|---|
| 364 | 4{111,55,3}   | COC(=O)C1=CN2C(NC3=C(F)C=C(Cl)C=C3)=C(N=C2C(C)=C1)C1=CC(=NC=C1)P(C)(C)=O  c:9,15,17,19,23,28,30,t:4,12,26 | Z8808559857 | 1{111} | COC(=O)c1cnc(N)c(C)c1    | 2{55}  | CP(=O)(C)c1cc(C=O)cen1       | 3{3}  | Fe1cc(Cl)ccc1[N+]#[C-]   | 0.0 | 0 |
| 365 | 4{211,90,65}  | CC1=NC(=CO1)C1=C(NC2CCCC2)N2C=CC=C(C3=NN=NN3)C2=N1  c:3,7,17,23,28,t:1,19,21                              | Z8808559854 | 1{211} | Nc1ncccc1c2nnn[nH]2      | 2{90}  | Cc1nc(C=O)col                | 3{65} | [C-]#[N+]C1CC1           | 0.0 | 0 |
| 366 | 4{239,123,22} | CC1=NC=C(N=C1)C1=C(NC2COC2)N2C=C(C=CC2=N1)N1CCCC1  c:3,5,8,17,19,22,t:1                                   | Z8810903042 | 1{239} | Cl.Cl.Nc1ccc(en1)N2CCCC2 | 2{123} | Cc1cnc(C=O)en1               | 3{22} | [C-]#[N+]C1CO1           | 0.0 | 0 |
| 367 | 4{63,205,10}  | COC(=O)C1=C2COCCN2C(=C1)C1=C(NC2COC2)N2C=CC(C)=C(OC)C2=N1  c:4,12,15,25,33,t:28                           | Z8810902998 | 1{63}  | COc1c(C)ccnc1N           | 2{205} | COC(=O)c1cc(C=O)n2CCOCc12    | 3{10} | [C-]#[N+]C1CCOC1         | 0.0 | 0 |
| 368 | 4{240,206,15} | CCNC1=C(C[C@H](C)NC(=O)OC(C)(C)C)N=C2C=CC(=CN12)C1=NNN=N1  c:3,18,20,28,t:16,25                           | Z8810902974 | 1{240} | Nc1ccc(en1)c2nn[nH]n2    | 2{206} | C[C@@H](CC=O)NC(=O)OC(C)(C)C | 3{15} | CC[N+]#[C-]              | 0.0 | 0 |
| 369 | 4{241,199,21} | BrC1=NN2C(C=C1)=NC(CN1C(=O)C3=C(C=CC=C3)C1=O)=C2NCC1CC1  c:5,7,16,18,23,t:1,14                            | Z8810902971 | 1{241} | Nc1ccc(Br)nn1            | 2{199} | O=CCN1C(=O)c2ccccc2C1=O      | 3{21} | [C-]#[N+]CC1C1           | 0.0 | 0 |
| 370 | 4{242,10,27}  | CCCCNC1=C(N=C2N1C=C(C=C2Cl)C(N)=O)C1=NC=CC(C)=C1  c:7,11,13,22,25,t:5,20                                  | Z8786904184 | 1{242} | NC(=O)c1cnc(N)c(Cl)c1    | 2{10}  | Cc1cnc(C=O)c1                | 3{27} | CCCC[N+]#[C-]            | 0.0 | 0 |
| 371 | 4{243,40,20}  | COC1=CC(C)=C(NC2=C(N=C3N2N=C(Cl)C2=C3C=CC=C2)C2=NC(CO)=CS2)C=C1  c:10,17,20,22,29,33,t:2,5,8,14,25        | Z8778277875 | 1{243} | Nc1nnc(Cl)c2ccccc12      | 2{40}  | OCc1csc(C=O)n1               | 3{20} | COc1ccc([N+]#[C-])c(C)c1 | 0.0 | 0 |
| 372 | 4{244,84,66}  | CSCCC1=C(NC(C)C2=CC=CC=C2)N2C=C(N=CC2=N1)C#N  c:4,11,13,17,19,22,t:9                                      | Z8781341800 | 1{244} | Nc1cnc(C#N)en1           | 2{84}  | CSCCC=O                      | 3{66} | CC([N+]#[C-])c1ccccc1    | 0.0 | 0 |
| 373 | 4{245,207,37} | COC(=O)C1CC(C1)NC1=C(N=C2C=CC=C(N12)C(C)(F)F)C1=CC(=NN1C)C(=O)OC  c:14,16,27,t:10,12,25                   | Z8781341781 | 1{245} | Cl.CC(F)(F)c1cccc(N)n1   | 2{207} | COC(=O)c1cc(C=O)n(C)n1       | 3{37} | COC(=O)C1CC(C1)[N+]#[C-] | 0.0 | 0 |
| 374 | 4{246,97,20}  | COC(=O)C1=C2N(C=CN3C(NC4=C(C)C=C(OC)C=C4)=C(N=C23)C2=CC=C(F)C=C2)N=C1  c:7,12,19,21,32,35,t:4,15,23,27,29 | Z8784060942 | 1{246} | COC(=O)c1cmn2ccnc(N)c12  | 2{97}  | Fe1ccc(C=O)cc1               | 3{20} | COc1ccc([N+]#[C-])c(C)c1 | 0.0 | 0 |
| 375 | 4{247,41,7}   | C1CC(CCO1)NC1=C(N=C2N1C=CN1N=CN=C21)C1=NC=CC=C1  c:10,14,17,25,27,t:8,19,23                               | Z8784060639 | 1{247} | Nc1nccn2ncnc12           | 2{41}  | O=Cc1ccccn1                  | 3{7}  | [C-]#[N+]C1CCOCC1        | 0.0 | 0 |

|     |               |                                                                                             |             |        |                               |        |                        |       |                               |     |   |
|-----|---------------|---------------------------------------------------------------------------------------------|-------------|--------|-------------------------------|--------|------------------------|-------|-------------------------------|-----|---|
| 376 | 4{248,22,14}  | COCCNC1=C(N=C2N1C=CC1=C2SC=C1)C1=CC=CC=C1  c:7,11,13,17,22,24,t:5,20                        | Z8784060579 | 1{248} | Nc1nccc2ccsc12                | 2{22}  | O=Cc1cccc1             | 3{14} | COCC[N+][#C-]                 | 0.0 | 0 |
| 377 | 4{20,170,6}   | CCOC(=O)CCCNC1=C(N=C2N1C(C)=CC(C)=C2C(N)=O)C1=NN(CC)N=N1  c:11,16,19,30,t:9,25              | Z8780122411 | 1{20}  | Cl.Cc1cc(C)c(C(=O)N)c(N)n1    | 2{170} | CCn1nnc(C=O)n1         | 3{6}  | CCOC(=O)CC[N+][#C-]           | 0.0 | 0 |
| 378 | 4{249,10,17}  | CC1=CC(=NC=C1)C1=C(NCC2CCOCC2)N2N=C(C)C=C(C2=N1)C(F)(F)F  c:3,5,8,23,26,t:1,20              | Z8780122347 | 1{249} | Cc1cc(c(N)nn1)C(F)(F)F        | 2{10}  | Cc1ccnc(C=O)c1         | 3{17} | [C-][#N+]CC1C COCC1           | 0.0 | 0 |
| 379 | 4{250,14,14}  | COCCNC1=C(N=C2N1C=C(Br)C=C2S(=O)(=O)N1CCCC1)C1=CC=C(C)C=C1  c:7,14,31,t:5,11,26,28          | Z8780122344 | 1{250} | Nc1ncc(Br)cc1S(=O)(=O)N2CCCC2 | 2{14}  | Cc1ccc(C=O)cc1         | 3{14} | COCC[N+][#C-]                 | 0.0 | 0 |
| 380 | 4{14,26,54}   | COC1=NC=CC2=NC(CCC3=CC=CC=C3)=C(NC3=CC=CC=C3)N12  c:4,13,15,22,24,t:2,6,11,17,20            | Z8711876243 | 1{14}  | COc1nccc(N)n1                 | 2{26}  | O=CCCc1cccc1           | 3{54} | [C-][#N+]c1cccc1              | 0.0 | 0 |
| 381 | 4{9,14,17}    | CC1=CC=C(C=C1)C1=C(NCC2CCOCC2)N2C=C(Cl)C=NC2=N1  c:3,5,8,23,26,t:1,20                       | Z8711871953 | 1{9}   | Nc1ncc(Cl)cn1                 | 2{14}  | Cc1ccc(C=O)cc1         | 3{17} | [C-][#N+]CC1C COCC1           | 0.0 | 0 |
| 382 | 4{251,208,23} | CCC1=CN=C(S1)C1=C(NC(CCC(=O)OC)C(=O)OC)N2C(C=CC3=C2NC(=O)C=C3)=N1  c:4,8,24,26,32,34,t:2    | Z8801681813 | 1{251} | Nc1ccc2ccc(=O)[nH]c2n1        | 2{208} | CCc1enc(C=O)s1         | 3{23} | COC(=O)CC C([N+][#C-])C(=O)OC | 0.0 | 0 |
| 383 | 4{252,97,20}  | COC1=CC(C)=C(NC2=C(N=C3N2C=CC(F)=C3)C2=CC=C(F)C=C2)C=C1  c:10,14,17,26,29,t:2,5,8,21,23     | Z8797786651 | 1{252} | Nc1nccc(F)c11                 | 2{97}  | Fc1ccc(C=O)cc1         | 3{20} | COc1ccc([N+][#C-])c(C)c1      | 0.0 | 0 |
| 384 | 4{253,69,14}  | COCCNC1=C(N=C2C=CC=C(N12)C(N)=S)C1=NN(C)C(C)=C1  c:9,11,24,t:5,7,19                         | Z8797781693 | 1{253} | NC(=S)c1ccc(N)n1              | 2{69}  | Cc1cc(C=O)nn1C         | 3{14} | COCC[N+][#C-]                 | 0.0 | 0 |
| 385 | 4{254,182,54} | COC(=O)C1=CN2C(C=C1C)=NC(=C2NC1=C C=CC=C1)C1=NC=CN1CC#C  c:8,11,13,19,21,26,t:4,17,24       | Z8778278035 | 1{254} | COC(=O)c1cnc(N)cc1C           | 2{182} | O=Cc1nccn1CC#C         | 3{54} | [C-][#N+]c1cccc1              | 0.0 | 0 |
| 386 | 4{22,207,13}  | COC(=O)C1=NN(C)C(=C1)C1=C(NCC2=CC=C(OC)C=C2)N2N=C(Cl)C=CC2=N1  c:8,11,21,28,31,t:4,15,17,25 | Z8803896962 | 1{22}  | Nc1ccc(Cl)nn1                 | 2{207} | COC(=O)c1cc(C=O)n(C)n1 | 3{13} | COc1ccc(C[N+][#C-])cc1        | 0.0 | 0 |
| 387 | 4{220,209,22} | C1CC1C1=CC=CN2C(NC3COC3)=C(N=C12)C1=NN=C2CCCCN12  c:6,15,t:4,17,21,23                       | Z8803896927 | 1{220} | Cl.Nc1nccc1C2CC2              | 2{209} | O=Cc1nnc2C CCCn12      | 3{22} | [C-][#N+]C1CO C1              | 0.0 | 0 |



|     |               |                                                                                                       |             |        |                                |        |                        |       |                            |     |   |
|-----|---------------|-------------------------------------------------------------------------------------------------------|-------------|--------|--------------------------------|--------|------------------------|-------|----------------------------|-----|---|
| 388 | 4{255,210,39} | CCOCCNC1=C(N=C2C=CC3=NC=C(Br)N3N12)C1=C(F)C=C(C=C1)C1=CC=NC=C1<br> c:10,22,25,27,32,34,t:6,8,12,14,30 | Z8803896923 | 1{255} | Nc1ccc2ncc(Br)n2n1             | 2{210} | Fe1cc(ccc1C=O)c2ccncc2 | 3{39} | CCOCC[N+]#[C-]             | 0.0 | 0 |
| 389 | 4{256,211,67} | CCC(C)NC1=C(N=C2C=CC3=NN=NN3N12)C1=C(Br)C=CC(Cl)=C1F<br> c:9,13,20,23,26,t:5,7,11                     | Z8803896957 | 1{256} | Nc1ccc2nnn2n1                  | 2{211} | Fe1c(Cl)ccc(Br)c1C=O   | 3{67} | CCC(C)[N+]#[C-]            | 0.0 | 0 |
| 390 | 4{125,212,15} | CCNC1=C(N=C2C=CC(CCO)=CN12)C1=NO<br>C(=C1)C(F)F  c:7,12,20,t:3,5,17                                   | Z8808559873 | 1{125} | Nc1ccc(CC(O)n1                 | 2{212} | FC(F)c1cc(C=O)no1      | 3{15} | CC[N+]#[C-]                | 0.0 | 0 |
| 391 | 4{257,213,28} | CCCNC1=C(N=C2N1C=CN=C2OCC(F)F)C1=C2COCCN2N=N1  c:6,10,12,20,28,t:4                                    | Z8808559872 | 1{257} | Nc1ncnc1OCC(F)F                | 2{213} | O=Cc1nm2COCc12         | 3{28} | CCC[N+]#[C-]               | 0.0 | 0 |
| 392 | 4{92,214,14}  | COCCNC1=C(N=C2C=C(C=CN12)C(N)=O)C1=CC=NN1CC(C)C  c:9,11,21,t:5,7,19                                   | Z8810903048 | 1{92}  | NC(=O)c1cnc(N)c1               | 2{214} | CC(C)Cn1ncc1C=O        | 3{14} | COCC[N+]#[C-]              | 0.0 | 0 |
| 393 | 4{78,215,39}  | CCOCCNC1=C(N=C2C=C(C)C3=NC(C)=CN3N12)C1=NC(=CS1)C1=CC=CC=C1<br> c:16,25,31,33,t:6,8,10,13,23,29       | Z8810903022 | 1{78}  | Cc1cn2nc(N)cc(C)c2n1           | 2{215} | O=Cc1nc(cs1)c2ccccc2   | 3{39} | CCOCC[N+]#[C-]             | 0.0 | 0 |
| 394 | 4{111,216,22} | COC(=O)C1=NC=C(S1)C1=C(NC2COC2)N2<br>C=C(C=C(C)C2=N1)C(=O)OC<br> c:6,10,19,25,t:4,21                  | Z8810902995 | 1{111} | COC(=O)c1cnc(N)c(C)c1          | 2{216} | COC(=O)c1ncc(C=O)s1    | 3{22} | [C-]#[N+]C1CO<br>C1        | 0.0 | 0 |
| 395 | 4{169,207,13} | CNC(=O)C1=NN2C(C=C1)=NC(=C2NCC1=C<br>C=C(OC)C=C1)C1=CC(=NN1C)C(=O)OC<br> c:8,10,12,23,28,t:4,17,19,26 | Z8810902985 | 1{169} | CNC(=O)c1ccc(N)nn1             | 2{207} | COC(=O)c1cc(C=O)n(C)n1 | 3{13} | COc1ccc(C[<br>N+]#[C-])cc1 | 0.0 | 0 |
| 396 | 4{258,217,67} | CCC(C)NC1=C(N=C2C=CC3=C(N=CC=N3)N12)C1=CC(=O)N(C)C=C1<br> c:9,13,15,27,t:5,7,11,21                    | Z8810902984 | 1{258} | Nc1ccc2nccnc2n1                | 2{217} | Cn1ccc(C=O)cc1=O       | 3{67} | CCC(C)[N+]#[C-]            | 0.0 | 0 |
| 397 | 4{259,11,7}   | FC(F)(F)CN1C=CC(=N1)C1=C(NC2CCOCC2)N2C(=N1)C(=CC1=C2CCC(F)(F)C1)C#N<br> c:6,8,11,22,25,27             | Z8810902976 | 1{259} | Nc1nc2CC(C(F)(F)C)c2cc1C#N     | 2{11}  | FC(F)(F)Cn1ccc(C=O)n1  | 3{7}  | [C-]#[N+]C1CCOCC1          | 0.0 | 0 |
| 398 | 4{260,218,14} | COCCNC1=C(N=C2N1C=CC=C2N1CCCC1)C1CC(C1)OC  c:7,11,13,t:5                                              | Z8810902962 | 1{260} | Nc1ncccc1N2CCCC2               | 2{218} | COC1CC(C1)C=O          | 3{14} | COCC[N+]#[C-]              | 0.0 | 0 |
| 399 | 4{261,21,39}  | CCOCCNC1=C(N=C2C=CC(=CN12)N1CCC(C1)N(C)C)C1=CC2=NC=NN2C=C1<br> c:10,12,31,35,t:6,8,27,29              | Z8798985033 | 1{261} | CN(C)C1C<br>CN(CC1)c2ccc(N)nc2 | 2{21}  | O=Cc1cn2nccnc2c1       | 3{39} | CCOCC[N+]#[C-]             | 0.0 | 0 |
| 400 | 4{262,181,28} | CCCNC1=C(N=C2C=CC(NC(C)=O)=CN12)C1=CN=C2CCCN12  c:8,14,t:4,6,19,21                                    | Z8786958954 | 1{262} | CC(=O)Nc1ccc(N)nc1             | 2{181} | O=Cc1cnc2C<br>CCn12    | 3{28} | CCC[N+]#[C-]               | 0.0 | 0 |
| 401 | 4{263,121,25} | CCC1=CON=C1C1=C(NCCCF)N2C=CC=C(C(F)F)C2=N1  c:5,8,16,24,t:2,18                                        | Z8781341772 | 1{263} | Nc1ncccc1C(F)F                 | 2{121} | CCc1cnc1C=O            | 3{25} | FCCC[N+]#[C-]              | 0.0 | 0 |

|     |               |                                                                                                   |             |        |                             |        |                   |       |                              |     |   |
|-----|---------------|---------------------------------------------------------------------------------------------------|-------------|--------|-----------------------------|--------|-------------------|-------|------------------------------|-----|---|
| 402 | 4{264,44,27}  | CCCCNC1=C(N=C2C=NC=C(N3CCCC3)N12)C1=CN(CC)N=C1  c:9,27,t:5,7,11,22                                | Z8784060344 | 1{264} | Nc1ncce(n1)N2CCCC2          | 2{44}  | CCn1cc(C=O)cn1    | 3{27} | CCCC[N+][#][C-]              | 0.0 | 0 |
| 403 | 4{18,40,20}   | COC1=CC(C)=C(NC2=C(N=C3C=C(Br)C(=CN23)[N+][O-])=O)C2=NC(CO)=CS2)C=C1  c:15,27,31,t:2,5,8,10,12,23 | Z8780122420 | 1{18}  | Nc1cc(Br)c(c1)[N+](=O)[O-]  | 2{40}  | OCc1csc(C=O)n1    | 3{20} | COc1ccc([N+][#][C-])c(C)c1   | 0.0 | 0 |
| 404 | 4{17,14,7}    | CC1=CC=C(C=C1)C1=C(NC2CCOCC2)N2C=CC=C(C2=N1)[N+][O-]=O  c:3,5,8,19,21,24,t:1                      | Z8780122033 | 1{17}  | Nc1ncce1[N+](=O)[O-]        | 2{14}  | Cc1ccc(C=O)cc1    | 3{7}  | [C-][#][N+]C1CCOCC1          | 0.0 | 0 |
| 405 | 4{265,80,14}  | COCCNC1=C(N=C2N1C(F)=CC=C2F)C1=NC=C(C)S1  c:7,12,14,t:5,18,20                                     | Z8780121774 | 1{265} | Nc1nc(F)cc1F                | 2{80}  | Cc1cnc(C=O)s1     | 3{14} | COCC[N+][#][C-]              | 0.0 | 0 |
| 406 | 4{3,26,17}    | C(CC1=CC=CC=C1)C1=C(NCC2CCOCC2)N2C=CSC2=N1  c:4,6,9,21,25,t:2                                     | Z8711876688 | 1{3}   | Nc1ncs1                     | 2{26}  | O=CCCc1ccc1       | 3{17} | [C-][#][N+]CC1C COCC1        | 0.0 | 0 |
| 407 | 4{266,22,13}  | COC1=CC=C(CNC2=C(N=C3N2C=CN=C3C#N)C2=CC=CC=C2)C=C1  c:10,14,16,23,25,28,t:2,4,8,21                | Z8741907203 | 1{266} | Nc1ncnc1C#N                 | 2{22}  | O=Cc1cccc1        | 3{13} | COc1ccc(C[N+][#][C-])cc1     | 0.0 | 0 |
| 408 | 4{267,219,1}  | CN1C=C(C=C1C#N)C1=C(NC2CC2)N2C(C=CC=C2C#C)=N1  c:2,4,9,18,20,24                                   | Z8801681851 | 1{267} | Nc1cccc(C#C)n1              | 2{219} | Cn1cc(C=O)cc1C#N  | 3{1}  | [C-][#][N+]C1CC1             | 0.0 | 0 |
| 409 | 4{174,220,51} | CC1=C(C(C)=NN1)C1=C(NCCNC(=O)OC(C)(C)C)N2C(C=CC=C2C#N)=N1  c:4,8,23,25,29,t:1                     | Z8801681843 | 1{174} | Nc1cccc(C#N)n1              | 2{220} | Cc1n[nH]c(C)c1C=O | 3{51} | CC(C)(C)OC(=O)NCC[N+][#][C-] | 0.0 | 0 |
| 410 | 4{99,68,41}   | COC1=CC=C(NC2=C(N=C3C=CC(=CN23)S(N)(=O)=O)C2=NC=C(S2)C(C)O)C=C1  c:11,13,24,31,t:2,4,7,9,22       | Z8801681811 | 1{99}  | Nc1ccc(c1)S(=O)(=O)N        | 2{68}  | CC(O)c1nc(C=O)s1  | 3{41} | COc1ccc([N+][#][C-])cc1      | 0.0 | 0 |
| 411 | 4{268,94,17}  | NC(=O)C1=CC(OC2=CN3C(C=C2)=NC(=C3)NCC2CCOCC2)C2=NC=CN=C2)=CC=C1  c:11,13,15,29,31,33,35,t:3,7,27  | Z8797784545 | 1{268} | NC(=O)c1ccc(Oc2ccc(N)nc2)c1 | 2{94}  | O=Cc1cncn1        | 3{17} | [C-][#][N+]CC1C COCC1        | 0.0 | 0 |
| 412 | 4{269,9,27}   | CCCCNC1=C(N=C2C=C3C=CNC3=CN12)C1=CSC=C1  c:11,15,23,t:5,7,9,20                                    | Z8797773920 | 1{269} | Nc1cc2cc[nH]c2cn1           | 2{9}   | O=Cc1ccsc1        | 3{27} | CCCC[N+][#][C-]              | 0.0 | 0 |
| 413 | 4{270,112,13} | COC1=CC=C(CNC2=C(N=C3C=CC4=NC=NN4N23)C2=C3C=CC=NN3N=C2)C=C1  c:12,16,23,25,27,31,34,t:2,4,8,10,14 | Z8778278047 | 1{270} | Nc1ccc2ncn2n1               | 2{112} | O=Cc1cmn2ncccc12  | 3{13} | COc1ccc(C[N+][#][C-])cc1     | 0.0 | 0 |
| 414 | 4{76,84,18}   | CSCCC1=C(NC(C)(C)C)N2C(C=CC(C)=C2C1)=N1  c:4,13,16,19                                             | Z8778278030 | 1{76}  | Cc1ccc(N)nc1Cl              | 2{84}  | CSCCC=O           | 3{18} | CC(C)(C)[N+][#][C-]          | 0.0 | 0 |

|     |               |                                                                                                           |             |        |                        |        |                            |       |                                              |     |   |
|-----|---------------|-----------------------------------------------------------------------------------------------------------|-------------|--------|------------------------|--------|----------------------------|-------|----------------------------------------------|-----|---|
| 415 | 4{151,157,9}  | CNC1=C(N=C2C=NC=C(Cl)N12)C1=NC2=C(C=C1)N=CC=C2  c:6,16,18,21,23,t:2,4,8,14                                | Z8803896945 | 1{151} | Nc1cnc(Cl)n1           | 2{157} | O=Cc1ccc2ncccc2n1          | 3{9}  | C[N+]#[C-]                                   | 0.0 | 0 |
| 416 | 4{222,221,5}  | COCCNC1=C(N=C2C=NC(=CN12)C(=O)OC)C1=NC(OC)=C(C)S1  c:10,12,t:6,8,21,25                                    | Z8803896936 | 1{222} | Cl.COC(=O)c1cnc(N)cn1  | 2{221} | COc1nc(C=O)sc1C            | 3{5}  | COCCC[N+]#[C-]                               | 0.0 | 0 |
| 417 | 4{262,222,10} | COC1=C(OCCN2CCOCC2)C=CC(=C1)C1=C(NC2CCOC2)N2C=C(NC(C)=O)C=CC2=N1  c:2,14,16,19,35,38,t:29                 | Z8808559889 | 1{262} | CC(=O)Nc1ccc(N)nc1     | 2{222} | COc1cc(C=O)ccc1OCCN2CCOCC2 | 3{10} | [C-]#[N+]C1CCOC1                             | 0.0 | 0 |
| 418 | 4{145,223,3}  | COC(=O)C1=NC=C(C=C1)C1=C(NC2=C(F)C=C(C1)C=C2)N2C(C=CC=C2S(C)(=O)=O)=N1  c:6,8,11,14,20,25,27,33,t:4,17    | Z8808559871 | 1{145} | CS(=O)(=O)c1cccc(N)n1  | 2{223} | Cl.COC(=O)c1ccc(C=O)cn1    | 3{3}  | Fe1cc(Cl)ccc1[N+]#[C-]                       | 0.0 | 0 |
| 419 | 4{105,224,66} | CC(NC1=C(N=C2C=CC=C(N12)C(N)=O)C1COC1C)C1=CC=CC=C1  c:7,9,26,28,t:3,5,24                                  | Z8810903039 | 1{105} | NC(=O)c1ccc(N)n1       | 2{224} | CC1OCCC1C=O                | 3{66} | CC([N+]#[C-])c1ccccc1                        | 0.0 | 0 |
| 420 | 4{158,225,18} | CC(C)(C)NC1=C(N=C2C=NC(=CN12)P(C)(C)=O)C1=C2C=NNC2=CC(Cl)=C1  c:9,11,20,22,26,29,t:5,7                    | Z8810903021 | 1{158} | CP(=O)(C)c1cnc(N)cn1   | 2{225} | Clc1cc(C=O)c2cn[nH]c2c1    | 3{18} | CC(C)(C)[N+]#[C-]                            | 0.0 | 0 |
| 421 | 4{271,226,67} | CCC(C)NC1=C(N=C2C=CC(C(=O)OC)=C(F)N12)C1=C(C)N(CC(F)(F)F)N=C1  c:9,21,30,t:5,7,15                         | Z8810903011 | 1{271} | COC(=O)c1ccc(N)nc1F    | 2{226} | Cc1c(C=O)cn1CC(F)(F)F      | 3{67} | CCC(C)[N+]#[C-]                              | 0.0 | 0 |
| 422 | 4{144,227,37} | CNS(=O)(=O)C1=CN2C(NC3CC(C3)C(=O)OC)=C(N=C2C=C1)C1=NC=CS1  c:18,20,23,28,t:5,26                           | Z8810902996 | 1{144} | CNS(=O)(=O)c1ccc(N)nc1 | 2{227} | O=Cc1nccs1                 | 3{37} | COC(=O)C1CC(C1)[N+]#[C-]                     | 0.0 | 0 |
| 423 | 4{158,228,32} | CC(C)(C)OC(=O)N1CCC(C1)C1=C(NC2CCC2)N2C=C(N=CC2=N1)P(C)(C)=O  c:13,22,24,27                               | Z8798985055 | 1{158} | CP(=O)(C)c1cnc(N)cn1   | 2{228} | CC(C)(C)OC(=O)N1CCC(C1)C=O | 3{32} | [C-]#[N+]C1CCOC1                             | 0.0 | 0 |
| 424 | 4{272,229,29} | CCOC(=O)CCNC1=C(N=C2C=CC(CN3CCCC3)=CN12)C1=CN=C(OCCO)C=C1  c:12,21,34,t:8,10,26,28                        | Z8798985037 | 1{272} | Nc1ccc(CN2CCCC2)cn1    | 2{229} | OCCOc1ccc(C=O)cn1          | 3{29} | CCOC(=O)C[N+]#[C-]                           | 0.0 | 0 |
| 425 | 4{273,230,64} | COC(=O)[C@@H]1CC[C@@H](C1)NC1=C(N=C2C=C3C=NNC3=CN12)C1=CC(OC)=CN=C1  &1:4,7,r,c:17,21,30,32,t:11,13,15,26 | Z8786958894 | 1{273} | Nc1cc2cn[nH]c2cn1      | 2{230} | COc1cnc(C=O)c1             | 3{64} | COC(=O)[C@@H]1CC[C@@H](C1)[N+]#[C-] &1:4,7,r | 0.0 | 0 |

|     |               |                                                                                          |             |        |                         |        |                       |       |                           |     |   |
|-----|---------------|------------------------------------------------------------------------------------------|-------------|--------|-------------------------|--------|-----------------------|-------|---------------------------|-----|---|
| 426 | 4{274,69,6}   | CCOC(=O)CCCNC1=C(N=C2N1C=C(C=C2F)C(=O)OC)C1=NN(C)C(C)=C1<br> c:11,15,17,30,t:9,25        | Z8786938003 | 1{274} | COC(=O)c1cnc(N)c(F)c1   | 2{69}  | Cc1cc(C=O)nn1C        | 3{6}  | CCOC(=O)C<br>CC[N+]#[C-]  | 0.0 | 0 |
| 427 | 4{275,58,7}   | FC1=CC=C(Cl)N2C(NC3CCOCC3)=C(N=C12)C1=NSN=C1  c:15,24,t:1,3,17,21                        | Z8786838534 | 1{275} | Nc1nc(Cl)cc1F           | 2{58}  | O=Cc1cnsn1            | 3{7}  | [C-]<br>#[N+]C1CC<br>OCC1 | 0.0 | 0 |
| 428 | 4{276,48,7}   | N#CCC1=CC=CC2=NC(=C(NC3CCOCC3)N12)C1=CNC(=N1)C1CCC1  c:5,25,t:3,7,9,22                   | Z8781341802 | 1{276} | Nc1cccc(C#N)n1          | 2{48}  | O=Cc1c[nH]c(n1)C2CCC2 | 3{7}  | [C-]<br>#[N+]C1CC<br>OCC1 | 0.0 | 0 |
| 429 | 4{137,112,14} | COCCNC1=C(N=C2C=CC(C)=NN12)C1=C2C=CC=NN2N=C1  c:9,12,17,19,21,25,t:5,7                   | Z8781341792 | 1{137} | Cc1ccc(N)n1             | 2{112} | O=Cc1cnn2ncccc12      | 3{14} | COCC[N+]#[C-]             | 0.0 | 0 |
| 430 | 4{277,231,4}  | CCOC1=NN2C(C=C1)=NC(C1=NC3=C(CC(C)CC3)S1)=C2NCC1=NN(C)N=N1<br> c:7,9,23,32,t:3,12,14,28  | Z8781341786 | 1{277} | CCOCc1ccc(N)n1          | 2{231} | CC1CCc2nc(C=O)sc2C1   | 3{4}  | Cn1nnc(C[N+]#[C-])n1      | 0.0 | 0 |
| 431 | 4{213,232,27} | CCCCNC1=C(N=C2N1C(OC)=CC=C2F)C1=NOCC1  c:7,13,15,t:5,19                                  | Z8780122425 | 1{213} | COc1ccc(F)c(N)n1        | 2{232} | O=CC1=NOCC1           | 3{27} | CCCC[N+]#[C-]             | 0.0 | 0 |
| 432 | 4{278,80,27}  | CCCCNC1=C(N=C2C=CC(C#N)=C(F)N12)C1=NC=C(C)S1  c:9,t:5,7,13,19,21                         | Z8780122343 | 1{278} | Nc1ccc(C#N)c(F)n1       | 2{80}  | Cc1cnc(C=O)s1         | 3{27} | CCCC[N+]#[C-]             | 0.0 | 0 |
| 433 | 4{279,77,6}   | CCOC(=O)CCCNC1=C(CC2CCCC2)N=C2N1C=C(Br)C=C2S(=O)(=O)NC  c:9,18,25,t:22                   | Z8780122340 | 1{279} | CNS(=O)(=O)c1cc(Br)cn1N | 2{77}  | O=CCC1CCCC1           | 3{6}  | CCOC(=O)C<br>CC[N+]#[C-]  | 0.0 | 0 |
| 434 | 4{279,58,27}  | CCCCNC1=C(N=C2N1C=C(Br)C=C2S(=O)(=O)NC)C1=NSN=C1  c:7,14,25,t:5,11,22                    | Z8780122268 | 1{279} | CNS(=O)(=O)c1cc(Br)cn1N | 2{58}  | O=Cc1cnsn1            | 3{27} | CCCC[N+]#[C-]             | 0.0 | 0 |
| 435 | 4{280,26,7}   | BrC1=C2N=CC=CC2=CC2=NC(CCC3=CC=C(C=C3)=C(NC3CCOCC3)N12<br> c:1,3,5,8,17,19,t:10,15,21    | Z8776690337 | 1{280} | Nc1cc2cccn2c(Br)n1      | 2{26}  | O=CCCc1ccc1           | 3{7}  | [C-]<br>#[N+]C1CC<br>OCC1 | 0.0 | 0 |
| 436 | 4{244,26,26}  | FC1=CC=C(CNC2=C(CCC3=CC=CC=C3)N=C3C=NC(=CN23)C#N)C=C1<br> c:7,13,15,20,22,29,t:1,3,11,18 | Z8776690340 | 1{244} | Nc1cnc(C#N)n1           | 2{26}  | O=CCCc1ccc1           | 3{26} | Fc1ccc(C[N+]#[C-])cc1     | 0.0 | 0 |
| 437 | 4{15,15,27}   | CCCCNC1=C(N=C2C=CN=C(F)N12)C1=CC=C(OC)C=C1  c:9,23,t:5,7,11,17,19                        | Z8711876135 | 1{15}  | Nc1cnc(F)n1             | 2{15}  | COc1ccc(C=O)cc1       | 3{27} | CCCC[N+]#[C-]             | 0.0 | 0 |
| 438 | 4{281,14,54}  | CC1=CC=C(C=C1)C1=C(NC2=CC=CC=C2)N2C=CN=C(F)C2=N1<br> c:3,5,8,13,15,19,25,t:1,11,21       | Z8711876133 | 1{281} | Nc1cncnc1F              | 2{14}  | Cc1ccc(C=O)cc1        | 3{54} | [C-]<br>#[N+]c1cccc1      | 0.0 | 0 |
| 439 | 4{282,26,14}  | COCCNC1=C(CCC2=CC=CC=C2)N=C2C=N=C(C(O)N12  c:5,11,13,18,t:9,16,20                        | Z8711875965 | 1{282} | Nc1cnc(O)n1             | 2{26}  | O=CCCc1ccc1           | 3{14} | COCC[N+]#[C-]             | 0.0 | 0 |

|     |               |                                                                                                       |             |        |                           |        |                    |       |                               |     |   |
|-----|---------------|-------------------------------------------------------------------------------------------------------|-------------|--------|---------------------------|--------|--------------------|-------|-------------------------------|-----|---|
| 440 | 4{8,26,17}    | CC1=NC2=NC(CCC3=CC=CC=C3)=C(NCC3CCOCC3)N2C(C)=C1  c:10,12,28,t:1,3,8,14                               | Z8711872601 | 1{8}   | Cc1cc(C)nc(N)n1           | 2{26}  | O=CCCc1ccc1        | 3{17} | [C-]#[N+]CC1C COCC1           | 0.0 | 0 |
| 441 | 4{283,233,39} | CCOCCNC1=C(CCCOCC=C)N=C2C=CC3=C(N=CC(=C3)C(=O)OC)N12  c:6,17,21,23,t:15,19                            | Z8801681852 | 1{283} | COC(=O)c1cnc2nc(N)ccc2c1  | 2{233} | C=CCOCCC C=O       | 3{39} | CCOCC[N+]#[C-]                | 0.0 | 0 |
| 442 | 4{284,234,32} | N#CCC1=CC2=NC(=C(NC3CCCC3)N2C=C1)C1=NN=C2CCCCCN12  c:17,t:3,5,7,20,22                                 | Z8801681812 | 1{284} | Nc1cc(CC#N)ccn1           | 2{234} | O=Cc1nnc2CCCCn12   | 3{32} | [C-]#[N+]C1CC C1              | 0.0 | 0 |
| 443 | 4{285,10,7}   | CC1=CC(=NC=C1)C1=C(NC2CCOCC2)N2C(=N1)C1=C(C=C(Br)C=C1)C=C2C  c:3,5,8,19,27,30,t:1,22,24               | Z8797779857 | 1{285} | Cc1cc2cc(Br)ccc2c(N)n1    | 2{10}  | Cc1ccnc(C=O)c1     | 3{7}  | [C-]#[N+]C1CC OCC1            | 0.0 | 0 |
| 444 | 4{284,157,11} | BrC1=CC(CNC2=C(N=C3C=C(CC#N)C=CN23)C2=NC3=C(C=C2)N=CC=C3)=CC=C1  c:15,22,24,27,29,31,33,t:1,6,8,10,20 | Z8778278043 | 1{284} | Nc1cc(CC#N)ccn1           | 2{157} | O=Cc1ccc2ncccc2n1  | 3{11} | Br1cccc(C[ N+]#[C-])c1        | 0.0 | 0 |
| 445 | 4{94,79,27}   | CCCCNC1=C(N=C2C=CC(F)=NN12)C1=NC=CO1  c:9,12,19,t:5,7,17                                              | Z8778278041 | 1{94}  | Nc1ccc(F)n1               | 2{79}  | O=Cc1ncco1         | 3{27} | CCCC[N+]#[C-]                 | 0.0 | 0 |
| 446 | 4{81,129,9}   | CNC1=C(N=C2C=NC=CN12)C1=CC=CC2=NC=NN12  c:6,8,15,19,t:2,4,13,17                                       | Z8808559888 | 1{81}  | Nc1cncn1                  | 2{129} | O=Cc1cccc2ncnn12   | 3{9}  | C[N+]#[C-]                    | 0.0 | 0 |
| 447 | 4{286,235,23} | COC(=O)CCC(NC1=C(N=C2C=CC(=CN12)C1=NC=CC=C1)C1=CSC(=C1)C#N)C(=O)OC  c:12,14,21,23,29,t:8,10,19,26     | Z8808559878 | 1{286} | Cl.Cl.Nc1cc(cn1)c2ccc cn2 | 2{235} | O=Cc1csc(C#N)c1    | 3{23} | COC(=O)CC C([N+]#[C-])C(=O)OC | 0.0 | 0 |
| 448 | 4{287,236,21} | C1C1=CC2=NC(CCC3OCCO3)=C(NCC3CC3)N2C=C1  c:23,t:1,3,13                                                | Z8810903029 | 1{287} | Nc1cc(Cl)cc n1            | 2{236} | O=CCCC1O CCO1      | 3{21} | [C-]#[N+]CC1C C1              | 0.0 | 0 |
| 449 | 4{288,148,39} | CCOCCNC1=C(N=C2C=C(NC(=O)OC(C)(C)C)C=CN12)C1=C(OC)N(C)N=C1C  c:20,25,31,t:6,8,10                      | Z8810903014 | 1{288} | CC(C)(C)OC(=O)Nc1cnc(N)c1 | 2{148} | COc1c(C=O)c(C)nn1C | 3{39} | CCOCC[N+]#[C-]                | 0.0 | 0 |
| 450 | 4{238,237,26} | COC1=C(C#N)C2=NC(C3CCCOCC3)=C(NC3=CC=C(F)C=C3)N2C=C1  c:2,25,30,t:6,16,20,22                          | Z8810902986 | 1{238} | COc1cnc(N)c1C#N           | 2{237} | O=CC1CCC OCC1      | 3{26} | Fc1ccc(C[N+]#[C-])cc1         | 0.0 | 0 |
| 451 | 4{158,2,31}   | CSCCNC1=C(N=C2C=NC(=CN12)P(C)(C)=O)C1=C(F)C=NC(Cl)=C1  c:9,11,20,23,26,t:5,7                          | Z8798985045 | 1{158} | CP(=O)(C)c1cnc(N)cn1      | 2{2}   | Fc1cnc(Cl)cc 1C=O  | 3{31} | CSCC[N+]#[C-]                 | 0.0 | 0 |
| 452 | 4{284,95,30}  | CN(C)C1=NC=CC(=C1)C1=C(NCC2=CN(C)N=C2)N2C=CC(CC#N)=CC2=N1  c:5,7,10,18,22,27,30,t:3,14                | Z8781341770 | 1{284} | Nc1cc(CC#N)ccn1           | 2{95}  | CN(C)c1cc(C=O)ccn1 | 3{30} | Cn1cc(C[N+]#[C-])cn1          | 0.0 | 0 |

|     |               |                                                                                      |             |        |                            |        |                   |       |                       |     |   |
|-----|---------------|--------------------------------------------------------------------------------------|-------------|--------|----------------------------|--------|-------------------|-------|-----------------------|-----|---|
| 453 | 4{21,69,17}   | CN1N=C(C=C1C)C1=C(NCC2CCOCC2)N2C(=N1)C(=CC=C2Cl)S(N)(=O)=O  c:2,4,8,20,23,25         | Z8780122404 | 1{21}  | Nc1nc(Cl)ccc1S(=O)(=O)N    | 2{69}  | Cc1cc(C=O)nn1C    | 3{17} | [C-]#[N+]CC1C COCC1   | 0.0 | 0 |
| 454 | 4{289,97,6}   | CCOC(=O)CCCN1=C(N=C2N1C=CC=C2C(F)(F)C(F)(F)F)C1=CC=C(F)C=C1  c:11,15,17,32,t:9,27,29 | Z8780122348 | 1{289} | Cl.Nc1nccc1C(F)(F)C(F)(F)F | 2{97}  | Fc1ccc(C=O)cc1    | 3{6}  | CCOC(=O)C CC[N+]#[C-] | 0.0 | 0 |
| 455 | 4{290,41,7}   | COC(=O)C1=CC=C(Br)N2C(NC3CCOCC3)=C(N=C12)C1=NC=CC=C1  c:18,26,28,t:4,6,20,24         | Z8780122335 | 1{290} | COC(=O)c1ccc(Br)nc1N       | 2{41}  | O=Cc1ccccn1       | 3{7}  | [C-]#[N+]C1CC OCC1    | 0.0 | 0 |
| 456 | 4{5,26,17}    | C(NC1=C(CCC2=CC=CC=C2)N=C2NN=NN12)C1CCOCC1  c:2,8,10,16,t:6,13                       | Z8711892497 | 1{5}   | Nc1nnn[nH]1                | 2{26}  | O=CCCc1ccc1       | 3{17} | [C-]#[N+]CC1C COCC1   | 0.0 | 0 |
| 457 | 4{291,22,54}  | C1C1=CN2C(NC3=CC=CC=C3)=C(N=C2C(Cl)=C1)C1=CC=CC=C1  c:8,10,12,14,18,23,25,t:1,6,21   | Z8711876685 | 1{291} | Nc1ncc(Cl)cc1Cl            | 2{22}  | O=Cc1cccc1        | 3{54} | [C-]#[N+]c1cccc1      | 0.0 | 0 |
| 458 | 4{10,26,27}   | CCCCN1=C(CCC2=CC=CC=C2)N=C2N=C(C(Br)=CN12)  c:5,11,13,18,21,t:9,16                   | Z8711871783 | 1{10}  | Nc1ncc(Br)cn1              | 2{26}  | O=CCCc1ccc1       | 3{27} | CCCC[N+]#[C-]         | 0.0 | 0 |
| 459 | 4{292,130,32} | CCOC1=CN=CC2=NC(=C(NC3CCC3)N12)C1=NN=C(OC)C=C1  c:5,26,t:3,7,9,20,22                 | Z8801681848 | 1{292} | CCOc1nccc(N)n1             | 2{130} | COc1ccc(C=O)nn1   | 3{32} | [C-]#[N+]C1CC C1      | 0.0 | 0 |
| 460 | 4{293,156,10} | COC1=CC(C)=CN2C(NC3CCOC3)=C(N=C12)C1=C(Cl)N=CN1C  c:5,15,21,24,t:2,17                | Z8801681819 | 1{293} | COc1cc(C)cnc1N             | 2{156} | Cn1enc(Cl)c1C=O   | 3{10} | [C-]#[N+]C1CC OC1     | 0.0 | 0 |
| 461 | 4{234,238,39} | CCOCCN1=C(N=C2N1C=CN=C2OC1CCC1)C1=C(Br)N=C2COCCN12  c:8,12,14,23,t:6,26              | Z8801681807 | 1{234} | Nc1nccnc1OC2CCC2           | 2{238} | Brc1nc2COCn2c1C=O | 3{39} | CCOCC[N+]#[C-]        | 0.0 | 0 |
| 462 | 4{294,10,6}   | CCOC(=O)CCCN1=C(N=C2N1C=C(C=C2Cl)S(C)(=O)=O)C1=NC=CC(C)=C1  c:11,15,17,27,30,t:9,25  | Z8797786418 | 1{294} | CS(=O)(=O)c1enc(N)c(Cl)c1  | 2{10}  | Cc1ccnc(C=O)c1    | 3{6}  | CCOC(=O)C CC[N+]#[C-] | 0.0 | 0 |
| 463 | 4{229,170,7}  | CCN1N=NC(=N1)C1=C(NC2CCOCC2)N2C=C(C=C2=N1)S(O)(=O)=O  c:3,5,8,19,21,24               | Z8797781947 | 1{229} | Nc1ccc(en1)S(=O)(=O)O      | 2{170} | CCn1nnc(C=O)n1    | 3{7}  | [C-]#[N+]C1CC OCC1    | 0.0 | 0 |
| 464 | 4{295,80,14}  | COCCN1=C(N=C2N1C(C)=CC1=C2C=CC=C1)C1=NC=C(C)S1  c:7,12,14,17,19,t:5,22,24            | Z8797778300 | 1{295} | Cc1cc2cccc2c(N)n1          | 2{80}  | Cc1enc(C=O)s1     | 3{14} | COCC[N+]#[C-]         | 0.0 | 0 |
| 465 | 4{296,22,7}   | BrC1=CC2=CC3=NC(=C(NC4CCOCC4)N3=C2C=C1)C1=CC=CC=C1  c:19,22,27,29,t:1,3,5,7,25       | Z8797775351 | 1{296} | Nc1cc2cc(Br)ccc2en1        | 2{22}  | O=Cc1cccc1        | 3{7}  | [C-]#[N+]C1CC OCC1    | 0.0 | 0 |

|     |               |                                                                                                     |             |        |                             |        |                       |       |                           |     |   |
|-----|---------------|-----------------------------------------------------------------------------------------------------|-------------|--------|-----------------------------|--------|-----------------------|-------|---------------------------|-----|---|
| 466 | 4{123,239,6}  | CCOC(=O)CCNC1=C(N=C2C=C(OCCO)C=CN12)C1=NOC2=C1CCCC2<br> c:19,27,t:9,11,13,24                        | Z8778278033 | 1{123} | Cl.Nc1cc(OCCO)ccn1          | 2{239} | O=Cc1noc2CCCCc12      | 3{6}  | CCOC(=O)CC[N+]#[C-]       | 0.0 | 0 |
| 467 | 4{46,240,9}   | CCN1N=C(Br)C=C1C1=C(NC)N2C=CC=CC2=N1  c:6,9,14,16,19,t:3                                            | Z8803896938 | 1{46}  | Nc1cccn1                    | 2{240} | CCn1nc(Br)cc1C=O      | 3{9}  | C[N+]#[C-]                | 0.0 | 0 |
| 468 | 4{99,241,41}  | COC1=CC=C(NC2=C(N=C3C=CC(=CN23)S(N)(=O)=O)C2=C(Br)C=NN2C)C=C1<br> c:11,13,22,25,30,t:2,4,7,9        | Z8808559900 | 1{99}  | Nc1ccc(en1)S(=O)(=O)N       | 2{241} | Cn1ncc(Br)cc1C=O      | 3{41} | COc1ccc([N+]#[C-])cc1     | 0.0 | 0 |
| 469 | 4{121,242,10} | BrC1=CC2=NC(=C(NC3CCOC3)N2C=C1)C1=CN2N=CC(C#N)=C2N=C1<br> c:16,22,26,29,t:1,3,5,19                  | Z8808559894 | 1{121} | Nc1cc(Br)ccn1               | 2{242} | O=Cc1cnc2c(C#N)enn2c1 | 3{10} | [C-]#[N+]C1CCOC1          | 0.0 | 0 |
| 470 | 4{297,243,7}  | CCC1=NOC=C1C1=C(NC2CCOCC2)N2C(=N1)C(C#N)=C(C)C1=C2C=CC=C1<br> c:5,8,19,27,30,32,t:2,24              | Z8808559868 | 1{297} | Cc1c(C#N)cc(N)nc2cccc12     | 2{243} | CCc1nocc1C=O          | 3{7}  | [C-]#[N+]C1CCOCC1         | 0.0 | 0 |
| 471 | 4{298,244,62} | COC(=O)C1(CCCC1)NC1=C(N=C2C=CC3=C(N=C(Cl)C=C3)N12)C1=CN(C)C(=O)C=C1<br> c:15,22,34,t:11,13,17,19,28 | Z8810903004 | 1{298} | Nc1ccc2ccc(Cl)nc2n1         | 2{244} | Cn1cc(C=O)ccc1=O      | 3{62} | COC(=O)C1(CCCC1)[N+]#[C-] | 0.0 | 0 |
| 472 | 4{125,245,31} | COC(=O)C1=CSC(=C1)C1=C(NCCSC)N2C=C(CCO)C=CC2=N1  c:7,10,23,26,t:4,18                                | Z8810902968 | 1{125} | Nc1ccc(CC)cc1               | 2{245} | COC(=O)c1csc(C=O)c1   | 3{31} | CSCC[N+]#[C-]             | 0.0 | 0 |
| 473 | 4{260,246,14} | COCCNC1=C(N=C2N1C=CC=C2N1CCCC1)C1CC1CCOC1  c:7,11,13,t:5                                            | Z8810902964 | 1{260} | Nc1ncccc1N2CCCC2            | 2{246} | O=CC1CC21CCCOC2       | 3{14} | COCC[N+]#[C-]             | 0.0 | 0 |
| 474 | 4{101,247,6}  | CCOC1CC(C1)C1=C(NCCCC(=O)OCC)N2C=C(CO)C=C(Cl)C2=N1  c:8,28,t:20,24                                  | Z8810902959 | 1{101} | Nc1ncc(CO)cc1Cl             | 2{247} | CCOC1CC(C1)C=O        | 3{6}  | CCOC(=O)CC[N+]#[C-]       | 0.0 | 0 |
| 475 | 4{24,27,13}   | COC1=CC=C(CNC2=C(N=C3N2C=CN=C3Cl)C2=NN(C)C(C)=N2)C=C1<br> c:10,14,16,25,28,t:2,4,8,20               | Z8798985028 | 1{24}  | Nc1ncnc1Cl                  | 2{27}  | Cc1nc(C=O)nn1C        | 3{13} | COc1ccc(C[N+]#[C-])cc1    | 0.0 | 0 |
| 476 | 4{22,232,9}   | CNC1=C(N=C2C=CC(Cl)=NN12)C1=NOCC1<br> c:6,9,t:2,4,14                                                | Z8786958907 | 1{22}  | Nc1ccc(Cl)nn1               | 2{232} | O=CC1=NOCC1           | 3{9}  | C[N+]#[C-]                | 0.0 | 0 |
| 477 | 4{299,170,27} | CCCCNC1=C(N=C2N1C(OC)=CC=C2[N+]([O-])=O)C1=NN(CC)N=N1  c:7,13,15,26,t:5,21                          | Z8786939735 | 1{299} | COc1ccc([N+](=O)[O-])c(N)n1 | 2{170} | CCn1nnc(C=O)n1        | 3{27} | CCCC[N+]#[C-]             | 0.0 | 0 |
| 478 | 4{300,97,14}  | COCCNC1=C(N=C2N1C1=C(C=CC=C1)N=C2Cl)C1=CC=C(F)C=C1<br> c:7,13,15,18,27,t:5,11,22,24                 | Z8786917530 | 1{300} | Nc1nc2cccc2nc1Cl            | 2{97}  | Fc1ccc(C=O)cc1        | 3{14} | COCC[N+]#[C-]             | 0.0 | 0 |

|     |               |                                                                                     |             |        |                                    |        |                        |       |                            |     |   |
|-----|---------------|-------------------------------------------------------------------------------------|-------------|--------|------------------------------------|--------|------------------------|-------|----------------------------|-----|---|
| 479 | 4{301,94,7}   | FC1=CC(Cl)=CN2C(NC3CCOCC3)=C(N=C12)C1=NC=CN=C1  c:4,15,23,25,t:1,17,21              | Z8786838538 | 1{301} | Nc1ncc(Cl)cc1F                     | 2{94}  | O=Cc1cncn1             | 3{7}  | [C-]<br>#[N+]C1CCOCC1      | 0.0 | 0 |
| 480 | 4{241,79,12}  | BrC1=NN2C(C=C1)=NC(C1=NC=CO1)=C2NCC1CCOC1  c:5,7,12,15,t:1,10                       | Z8781341779 | 1{241} | Nc1ccc(Br)nn1                      | 2{79}  | O=Cc1ncco1             | 3{12} | [C-]<br>#[N+]CC1CCOC1      | 0.0 | 0 |
| 481 | 4{302,49,38}  | CC1=NNC=C1C1=C(NC2=CC3=C(OCO3)C=C2)N2N=CC(=CC2=N1)C#N  c:4,7,18,22,24,27,t:1,10,12  | Z8781341777 | 1{302} | Nc1cc(C#N)cnn1                     | 2{49}  | Cc1n[nH]cc1C=O         | 3{38} | [C-]<br>#[N+]c1ccc2OCOc2c1 | 0.0 | 0 |
| 482 | 4{303,94,17}  | C(NC1=C(N=C2N1N=CC1=C2C=CC=C1)C1=NC=CN=C1)C1CCOCC1  c:4,8,10,13,15,20,22,t:2,18     | Z8784060785 | 1{303} | Nc1nccc2ccc12                      | 2{94}  | O=Cc1cncn1             | 3{17} | [C-]<br>#[N+]CC1CCOCC1     | 0.0 | 0 |
| 483 | 4{304,10,6}   | CCOC(=O)CCCN1=C(N=C2N1C=C(Br)C=C2C#N)C1=NC=CC(C)=C1  c:11,18,25,28,t:9,15,23        | Z8780121875 | 1{304} | Nc1ncc(Br)cc1C#N                   | 2{10}  | Cc1ccnc(C=O)c1         | 3{6}  | CCOC(=O)C<br>CC[N+]#[C-]   | 0.0 | 0 |
| 484 | 4{196,118,17} | CC1=CN2C(NCC3CCOCC3)=C(N=C2C(=C1)C#N)C1=CC(C)=NC=C1  c:13,15,18,26,28,t:1,23        | Z8780121777 | 1{196} | Cc1cnc(N)c(C#N)c1                  | 2{118} | Cc1cc(C=O)ccn1         | 3{17} | [C-]<br>#[N+]CC1CCOCC1     | 0.0 | 0 |
| 485 | 4{305,14,14}  | CCN1CCN(CC1)C(=O)C1=CN2C(C=C1)=NC(=C2NCCOC)C1=CC=C(C)C=C1  c:15,17,19,32,t:11,27,29 | Z8776690327 | 1{305} | Cl.C1.CCN1CCN(CC1)C(=O)c2ccc(N)nc2 | 2{14}  | Cc1ccc(C=O)cc1         | 3{14} | COCC[N+]#[C-]              | 0.0 | 0 |
| 486 | 4{102,14,58}  | CN(C)C(=O)C1=CC2=NC(=C(NC3(C)CC3)N2C=C1)C1=CC=C(C)C=C1  c:19,27,t:5,7,9,22,24       | Z8776690342 | 1{102} | CN(C)C(=O)c1ccnc(N)c1              | 2{14}  | Cc1ccc(C=O)cc1         | 3{58} | CC1(CC1)[N+]#[C-]          | 0.0 | 0 |
| 487 | 4{4,14,14}    | COCCNC1=C(N=C2SC=NN12)C1=CC=C(C)C=C1  c:10,20,t:5,7,15,17                           | Z8711891697 | 1{4}   | Nc1nncs1                           | 2{14}  | Cc1ccc(C=O)cc1         | 3{14} | COCC[N+]#[C-]              | 0.0 | 0 |
| 488 | 4{6,15,14}    | COCCNC1=C(N=C2N=CC=CN12)C1=CC=C(OC)C=C1  c:9,11,22,t:5,7,16,18                      | Z8700285979 | 1{6}   | Nc1nccn1                           | 2{15}  | COc1ccc(C=O)cc1        | 3{14} | COCC[N+]#[C-]              | 0.0 | 0 |
| 489 | 4{81,15,58}   | COC1=CC=C(C=C1)C1=C(NC2(C)CC2)N2C=CN=CC2=N1  c:4,6,9,18,20,23,t:2                   | Z8712581562 | 1{81}  | Nc1cncn1                           | 2{15}  | COc1ccc(C=O)cc1        | 3{58} | CC1(CC1)[N+]#[C-]          | 0.0 | 0 |
| 490 | 4{223,248,34} | COC1=CC(Cl)=C(C2=C(NCC3CCCO3)N3N=C(C=CC3=N2)C(N)=O)C(F)=C1  c:7,18,20,23,30,t:2,5   | Z8801681817 | 1{223} | NC(=O)c1ccc(N)nn1                  | 2{248} | COc1cc(F)c(C=O)c(Cl)c1 | 3{34} | [C-]<br>#[N+]CC1CCCO1      | 0.0 | 0 |
| 491 | 4{306,118,17} | CC1=NC=CC(=C1)C1=C(NCC2CCOCC2)N2C=CC(=C(Cl)C2=N1)C(F)(F)F  c:3,5,8,20,26,t:1,22     | Z8797785420 | 1{306} | Nc1nccc(c1Cl)C(F)(F)F              | 2{118} | Cc1cc(C=O)ccn1         | 3{17} | [C-]<br>#[N+]CC1CCOCC1     | 0.0 | 0 |



|     |               |                                                                                                    |             |        |                                    |        |                                 |       |                              |     |   |
|-----|---------------|----------------------------------------------------------------------------------------------------|-------------|--------|------------------------------------|--------|---------------------------------|-------|------------------------------|-----|---|
| 492 | 4{307,118,14} | COCCNC1=C(N=C2N1C=C(Br)C1=C2C=CC=C1)C1=CC(C)=NC=C1<br> c:7,14,17,19,25,27,t:5,11,22                | Z8797779551 | 1{307} | Nc1ncc(Br)<br>c2cccc12             | 2{118} | Cc1cc(C=O)<br>ccn1              | 3{14} | COCC[N+][#]<br>C-]           | 0.0 | 0 |
| 493 | 4{308,18,58}  | CCOC1=CC2=NC(C3=CN(CCO)N=C3)=C(N<br>C3(C)CC3)N2C=C1  c:14,26,t:3,5,8,16                            | Z8778278040 | 1{308} | CCOc1ccnc<br>(N)c1                 | 2{18}  | OCCn1cc(C=<br>O)cn1             | 3{58} | CC1(CC1)[N<br>+][#][C-]      | 0.0 | 0 |
| 494 | 4{309,249,14} | CCN1N=CC=C1C1=C(NCCOC)N2C(C=NC=<br>C2C(F)(F)F)=N1  c:3,5,8,17,19,25                                | Z8778278031 | 1{309} | Nc1nccc(n1<br>)C(F)(F)F            | 2{249} | CCn1nccc1C<br>=O                | 3{14} | COCC[N+][#]<br>C-]           | 0.0 | 0 |
| 495 | 4{210,167,65} | FC1=CC=C(Br)C2=NC(C3=NN=CN3)=C(NC3<br>CCCC3)N12  c:11,t:1,3,6,9,14                                 | Z8803896971 | 1{210} | Nc1nc(F)cc<br>c1Br                 | 2{167} | O=Cc1nnc[n<br>H]1               | 3{65} | [C-<br>]#[N+]C1CC<br>CC1     | 0.0 | 0 |
| 496 | 4{310,250,66} | CC(NC1=C(N=C2N1C=CC1=C2N(C)C(=O)N<br>1C)C1=CN(C)N=C1Br)C1=CC=CC=C1<br> c:5,9,11,25,31,33,t:3,21,29 | Z8803896958 | 1{310} | Cn1c(=O)n(<br>C)c2c(N)nc<br>cc12   | 2{250} | Cn1cc(C=O)<br>c(Br)n1           | 3{66} | CC([N+][#][C-<br>])c1cccc1   | 0.0 | 0 |
| 497 | 4{119,251,10} | N#CC1=CN2C(NC3CCOC3)=C(N=C2C=C1)C<br>1=CC(=NN1)C1=CC=NC=C1<br> c:12,14,17,22,28,30,t:2,20,26       | Z8803896950 | 1{119} | Nc1ccc(C#<br>N)n1                  | 2{251} | O=Cc1cc(n[n<br>H]1)c2ccncc<br>2 | 3{10} | [C-<br>]#[N+]C1CC<br>OC1     | 0.0 | 0 |
| 498 | 4{77,13,1}    | CC1=C(N=NN1)C1=C(NC2CC2)N2C=C(C=C<br>C2=N1)C1=CN=CC=C1<br> c:3,7,15,17,20,25,27,t:1,23             | Z8803896941 | 1{77}  | Nc1ccc(en1<br>)c2ccncc2            | 2{13}  | Cc1[nH]nnc1<br>C=O              | 3{1}  | [C-<br>]#[N+]C1CC<br>1       | 0.0 | 0 |
| 499 | 4{176,252,14} | COCCNC1=C(N=C2N1C=CN=C2N1CCCC1)<br>C1=CC(F)=C(C=C1)C#N<br> c:7,11,13,25,27,t:5,22                  | Z8803896922 | 1{176} | Nc1ncnc1<br>N2CCCC2                | 2{252} | Fc1cc(C=O)c<br>cc1C#N           | 3{14} | COCC[N+][#]<br>C-]           | 0.0 | 0 |
| 500 | 4{229,253,68} | CCC1CC1C1=C(NC2CCCC2)N2C=C(C=CC<br>2=N1)S(O)(=O)=O  c:6,17,19,22                                   | Z8803896954 | 1{229} | Nc1ccc(en1<br>)S(=O)(=O)<br>O      | 2{253} | CCC1CC1C=<br>O                  | 3{68} | [C-<br>]#[N+]C1CC<br>CCC1    | 0.0 | 0 |
| 501 | 4{164,104,24} | COC1=CC(CNC2=C(N=C3C=C(CN(C)C)C=C<br>N23)C2=NC(C)=CO2)=CC=C1<br> c:17,25,28,30,t:2,7,9,11,22       | Z8808559890 | 1{164} | CN(C)Cc1c<br>cnc(N)c1              | 2{104} | Cc1coc(C=O)<br>n1               | 3{24} | COc1cccc(C[<br>N+][#][C-])c1 | 0.0 | 0 |
| 502 | 4{261,254,39} | CCOCCNC1=C(CCCCC#C)N=C2C=CC(=CN<br>12)N1CCC(CC1)N(C)C  c:6,16,18,t:14                              | Z8808559879 | 1{261} | CN(C)C1C<br>CN(CC1)c2<br>ccc(N)nc2 | 2{254} | O=CCCCC<br>#C                   | 3{39} | CCOCC[N+]<br>#[C-]           | 0.0 | 0 |
| 503 | 4{297,89,7}   | CCC1=NC=C(C=N1)C1=C(NC2CCOCC2)N2<br>C(=N1)C(C#N)=C(C)C1=C2C=CC=C1<br> c:4,6,9,20,28,31,33,t:2,25   | Z8808559866 | 1{297} | Cc1c(C#N)c<br>(N)nc2cccc<br>12     | 2{89}  | CCc1ncc(C=<br>O)cn1             | 3{7}  | [C-<br>]#[N+]C1CC<br>OCC1    | 0.0 | 0 |
| 504 | 4{311,255,10} | FC1=CC2=NC(=C(NC3CCOC3)N2C=C1)C1=<br>CC2=C(NC=N2)C=C1<br> c:16,24,27,t:1,3,5,19,21                 | Z8808559856 | 1{311} | Nc1cc(F)cc<br>n1                   | 2{255} | O=Cc1ccc2[<br>nH]enc2c1         | 3{10} | [C-<br>]#[N+]C1CC<br>OC1     | 0.0 | 0 |

|     |               |                                                                                                        |             |        |                               |        |                            |       |                              |     |   |
|-----|---------------|--------------------------------------------------------------------------------------------------------|-------------|--------|-------------------------------|--------|----------------------------|-------|------------------------------|-----|---|
| 505 | 4{312,256,39} | CCOCCNC1=C(N=C2C=CC3=C(NC(=O)NC3=O)N12)C1=CN(CCCl)N=C1<br> c:10,30,t:6,8,12,24                         | Z8810903024 | 1{312} | Nc1ccc2c(=O)[nH]c(=O)[nH]c2n1 | 2{256} | ClCCn1cc(C=O)cn1           | 3{39} | CCOCC[N+]#[C-]               | 0.0 | 0 |
| 506 | 4{151,257,9}  | CNC1=C(N=C2C=NC=C(Cl)N12)C1CC(C1)N<br>C(=O)OC(C)(C)C  c:6,t:2,4,8                                      | Z8810902999 | 1{151} | Nc1cncc(Cl)n1                 | 2{257} | CC(C)(C)OC(=O)NC1CC(C1)C=O | 3{9}  | C[N+]#[C-]                   | 0.0 | 0 |
| 507 | 4{271,258,67} | CCC(C)NC1=C(N=C2C=CC(C(=O)OC)=C(F)N12)C1=NN=C(S1)C1CC1  c:9,23,t:5,7,15,21                             | Z8810902994 | 1{271} | COC(=O)c1ccc(N)nc1F           | 2{258} | O=Cc1nnc(s1)C2CC2          | 3{67} | CCC(C)[N+]#[C-]              | 0.0 | 0 |
| 508 | 4{168,205,21} | COC(=O)C1=C2COCCN2C(=C1)C1=C(NCC2CC2)N2C(C=NC=C2C#N)=N1<br> c:4,12,15,25,27,31                         | Z8810902955 | 1{168} | Nc1cncc(C#N)n1                | 2{205} | COC(=O)c1cc(C=O)n2CCOCc12  | 3{21} | [C-]#[N+]CC1CC1              | 0.0 | 0 |
| 509 | 4{109,259,34} | COC1=C(C=C(C=C1)C1=CN=CN=C1)C1=C(NCC2CCCO2)N2C(C=CC=C2S(N)(=O)=O)=N1<br> c:4,6,11,13,16,28,30,36,t:2,9 | Z8798985063 | 1{109} | Cl.Nc1cccc(n1)S(=O)(=O)N      | 2{259} | COc1ccc(cc1C=O)c2ennc2     | 3{34} | [C-]#[N+]CC1CCO1             | 0.0 | 0 |
| 510 | 4{313,260,14} | COCCNC1=C(N=C2N1C1=C(CCCC1)C=C2C#N)C1=NOC(C)=C1  c:7,18,27,t:5,11,23                                   | Z8798985060 | 1{313} | Nc1nc2CCCCc2cc1C#N            | 2{260} | Cc1cc(C=O)no1              | 3{14} | COCC[N+]#[C-]                | 0.0 | 0 |
| 511 | 4{271,261,44} | COC(=O)C1=C(F)N2C(NCCCCNC(=O)OC(C)(C)C)=C(N=C2C=C1)C1=NC=C(C)N1C<br> c:4,21,23,26,t:29,31              | Z8798985025 | 1{271} | COC(=O)c1ccc(N)nc1F           | 2{261} | Cc1enc(C=O)n1C             | 3{44} | CC(C)(C)OC(=O)NCCCC[N+]#[C-] | 0.0 | 0 |
| 512 | 4{314,262,22} | CCC1=NN(C)C(=C1C1)C1=C(NC2COC2)N2C(C=CC=C2CC(=O)OC)=N1<br> c:6,10,20,22,29,t:2                         | Z8786958839 | 1{314} | COC(=O)C1cccc(N)n1            | 2{262} | CCc1nn(C)c(C=O)c1Cl        | 3{22} | [C-]#[N+]C1CO1               | 0.0 | 0 |
| 513 | 4{23,263,46}  | CC(=C)CNC1=C(N=C2C=NC=C(Br)N12)C1=CN=C2C=NC=CN12  c:9,21,23,t:5,7,11,17,19                             | Z8786958792 | 1{23}  | Nc1cncc(Br)n1                 | 2{263} | O=Cc1enc2cncn12            | 3{46} | CC(=C)C[N+]#[C-]             | 0.0 | 0 |
| 514 | 4{315,264,14} | COCCNC1=C(N=C2C=NC(Br)=C(F)N12)C1=NC(Br)=CN1  c:9,21,t:5,7,12,18                                       | Z8781341801 | 1{315} | Nc1enc(Br)c(F)n1              | 2{264} | Br1c[nH]c(C=O)n1           | 3{14} | COCC[N+]#[C-]                | 0.0 | 0 |
| 515 | 4{316,14,27}  | CCCCNC1=C(N=C2C=CC=C(N12)C(N)=N)C1=CC=C(C)C=C1  c:9,11,24,t:5,7,19,21                                  | Z8784060088 | 1{316} | Cl.Cl.NC(=N)c1cccc(N)n1       | 2{14}  | Cc1ccc(C=O)cc1             | 3{27} | CCCC[N+]#[C-]                | 0.0 | 0 |
| 516 | 4{317,29,20}  | CCN1C=CC(=N1)C1=C(NC2=C(C)C=C(OC)C=C2)N2C=C(C=C(C2=N1)C(F)(F)C(F)(F)F)<br> c:3,5,8,11,18,22,24,27,t:14 | Z8780122386 | 1{317} | Nc1ncc(cc1C(F)(F)F)C(F)(F)F   | 2{29}  | CCn1ccc(C=O)n1             | 3{20} | COc1ccc([N+]#[C-])c(C)c1     | 0.0 | 0 |

|     |               |                                                                                                        |             |        |                       |        |                                                             |       |                                               |     |   |
|-----|---------------|--------------------------------------------------------------------------------------------------------|-------------|--------|-----------------------|--------|-------------------------------------------------------------|-------|-----------------------------------------------|-----|---|
| 517 | 4{13,14,27}   | CCCCNC1=C(N=C2C=C(C)N=C(C)N12)C1=CC=C(C)C=C1  c:23,t:5,7,9,12,18,20                                    | Z8711876248 | 1{13}  | Cc1ccc(N)nc(C)n1      | 2{14}  | Cc1ccc(C=O)cc1                                              | 3{27} | CCCC[N+][C-]                                  | 0.0 | 0 |
| 518 | 4{169,14,14}  | CNC(=O)C1=NN2C(C=C1)=NC(=C2NCCOC)C1=CC=C(C)C=C1  c:8,10,12,25,t:4,20,22                                | Z8741907038 | 1{169} | CNC(=O)c1ccc(N)nn1    | 2{14}  | Cc1ccc(C=O)cc1                                              | 3{14} | COCC[N+][C-]                                  | 0.0 | 0 |
| 519 | 4{267,177,34} | COC(=O)C1CC(CC2=C(NCC3CCCO3)N3C(C=CC=C3C#C)=N2)C1  c:8,20,22,26                                        | Z8801681841 | 1{267} | Nc1cccc(C#C)n1        | 2{177} | COC(=O)C1CC(CC=O)C1                                         | 3{34} | [C-][N+]CC1C=CCO1                             | 0.0 | 0 |
| 520 | 4{229,265,64} | COC(=O)[C@@H]1CC[C@@H](C1)NC1=C(N=C2C=CC(=CN12)S(O)(=O)=O)C1CCCC1  &1:4,7,r,c:15,17,t:11,13            | Z8803896964 | 1{229} | Nc1ccc(en1)S(=O)(=O)O | 2{265} | O=CC1CCC=CC1                                                | 3{64} | COC(=O)[C@@H]1CC[C@@H](C1)[N+]#[C-]  &1:4,7,r | 0.0 | 0 |
| 521 | 4{38,266,9}   | CNC1=C(N=C2C=C(C=CN12)C#N)C1=CC(=CC=C1)C1=CN=C(C=C1)C#N  c:6,8,17,19,24,26,t:2,4,15,22                 | Z8803896949 | 1{38}  | Nc1cc(C#N)ccn1        | 2{266} | O=Cc1cccc(c1)c2ccc(C#N)nc2                                  | 3{9}  | C[N+]#[C-]                                    | 0.0 | 0 |
| 522 | 4{48,267,15}  | CCNC1=C(N=C2C=C(C=CN12)S(C)(=O)=O)[C@H](CCC(=O)OC(C)(C)C)NC(=O)OC(C)(C)C  c:7,9,t:3,5                  | Z8803896934 | 1{48}  | CS(=O)(=O)c1ccnc(N)c1 | 2{267} | CC(C)(C)OC(=O)CC[C@H](NC(=O)OC(C)(C)C)C=O                   | 3{15} | CC[N+]#[C-]                                   | 0.0 | 0 |
| 523 | 4{238,268,7}  | CC[C@@H](NC(=O)OC(C)(C)C)C1=C(NC2C=COCC2)N2C=CC(OC)=C(C#N)C2=N1  c:11,22,31,t:26                       | Z8808559880 | 1{238} | COc1ccnc(N)c1C#N      | 2{268} | CC[C@@H](NC(=O)OC(C)(C)C)C=O                                | 3{7}  | [C-][N+]C1CC=OCC1                             | 0.0 | 0 |
| 524 | 4{31,269,22}  | C1CC(C1)C1=CC(=NN1)C1=C(NC2COC2)N2C3=C(OCC3)C=CC2=N1  c:7,11,26,29,t:5,20                              | Z8810903036 | 1{31}  | Nc1ccc2OC=Cc2n1       | 2{269} | O=Cc1cc([N+][H])n1C2CCC2                                    | 3{22} | [C-][N+]C1CO=C1                               | 0.0 | 0 |
| 525 | 4{145,270,15} | CCNC1=C(N=C2C=CC=C(N12)S(C)(=O)=O)C1[C@H]2CC[C@H](C2)[C@@H]1NC(=O)OC(C)(C)C  &1:17,20,22,r,c:7,9,t:3,5 | Z8810903031 | 1{145} | CS(=O)(=O)c1cccc(N)n1 | 2{270} | CC(C)(C)OC(=O)N[C@@H]1C(C=O)[C@H]2CC[C@@H]1C2  &1:8,12,15,r | 3{15} | CC[N+]#[C-]                                   | 0.0 | 0 |

|     |               |                                                                                                    |             |        |                              |        |                     |       |                          |     |   |
|-----|---------------|----------------------------------------------------------------------------------------------------|-------------|--------|------------------------------|--------|---------------------|-------|--------------------------|-----|---|
| 526 | 4{258,271,67} | CCC(C)NC1=C(N=C2C=CC3=C(N=CC=N3)N12)C1=NN(C)N=N1  c:9,13,15,25,t:5,7,11,21                         | Z8810902979 | 1{258} | Nc1ccc2nccnc2n1              | 2{271} | Cn1nnc(C=O)n1       | 3{67} | CCC(C)[N+]#[C-]          | 0.0 | 0 |
| 527 | 4{211,3,66}   | CC(NC1=C(N=C2N1C=CC=C2C1=NN=NN1)C1=NC=C(C=C1)C#N)C1=CC=CC=C1  c:5,9,11,16,22,24,31,33,t:3,14,20,29 | Z8798985051 | 1{211} | Nc1ncccc1c2nnn[nH]2          | 2{3}   | O=Cc1ccc(C#N)cn1    | 3{66} | CC([N+]#[C-])c1cccc1     | 0.0 | 0 |
| 528 | 4{275,182,14} | COCCNC1=C(N=C2N1C(Cl)=CC=C2F)C1=NC=CN1CC#C  c:7,12,14,20,t:5,18                                    | Z8798985050 | 1{275} | Nc1nc(Cl)ccc1F               | 2{182} | O=Cc1nccn1CC#C      | 3{14} | COCC[N+]#[C-]            | 0.0 | 0 |
| 529 | 4{318,273,12} | COC(=O)C1=CN2C(NCC3CCOC3)=C(N=C2C(OC)=N1)C1=C(Br)N(C)N=C1C  c:15,17,22,25,30,t:4                   | Z8798985049 | 1{318} | COC(=O)c1cnc(N)c(OC)n1       | 2{273} | Cc1m(C)c(Br)c1C=O   | 3{12} | [C-]#[N+]CC1COC1         | 0.0 | 0 |
| 530 | 4{198,118,31} | CSCCNC1=C(N=C2C=NC(C#C)=C(Cl)N12)C1=CC(C)=NC=C1  c:9,22,24,t:5,7,13,19                             | Z8798985041 | 1{198} | Nc1nc(C#C)c(Cl)n1            | 2{118} | Cc1cc(C=O)ccn1      | 3{31} | CSCC[N+]#[C-]            | 0.0 | 0 |
| 531 | 4{35,129,9}   | CNC1=C(N=C2C=CC(C)=CN12)C1=CC=CC2=NC=NN12  c:6,9,16,20,t:2,4,14,18                                 | Z8798985036 | 1{35}  | Cc1ccc(N)nc1                 | 2{129} | O=Cc1cccc2ncm12     | 3{9}  | C[N+]#[C-]               | 0.0 | 0 |
| 532 | 4{314,231,4}  | COC(=O)CC1=CC=CC2=NC(C3=NC4=C(CC(C)CC4)S3)=C(NCC3=NN(C)N=N3)N12  c:7,31,t:5,9,12,14,23,27          | Z8786958826 | 1{314} | COC(=O)C1cccc(N)n1           | 2{231} | CC1CCc2nc(C=O)sc2C1 | 3{4}  | Cn1nnc(C[N+]#[C-])n1     | 0.0 | 0 |
| 533 | 4{25,274,25}  | CN(C)C1=CC=CC2=NC(CC3(CCOCC3)C#N)=C(NCCCF)N12  c:5,t:3,7,19                                        | Z8781341785 | 1{25}  | CN(C)c1ccc(N)n1              | 2{274} | O=CCC1(CCOC1)C#N    | 3{25} | FCCC[N+]#[C-]            | 0.0 | 0 |
| 534 | 4{319,275,25} | CN1C=C(C)N=C1C1=C(NCCCF)N2C(C=CC(Br)=C2C#N)=N1  c:5,8,17,20,24,t:2                                 | Z8781341771 | 1{319} | Nc1ccc(Br)c(C#N)n1           | 2{275} | Cc1cn(C)c(C=O)n1    | 3{25} | FCCC[N+]#[C-]            | 0.0 | 0 |
| 535 | 4{320,29,7}   | CCN1C=CC(=N1)C1=C(NC2CCOCC2)N2C=CN3N=CC(=C3C2=N1)[N+][[O-]]=O  c:3,5,8,19,22,24,28                 | Z8784060976 | 1{320} | Nc1nccn2ncc([N+](=O)[O-])c12 | 2{29}  | CCn1ccc(C=O)n1      | 3{7}  | [C-]#[N+]C1CCOCC1        | 0.0 | 0 |
| 536 | 4{321,80,20}  | COC1=CC(C)=C(NC2=C(N=C3N2C=CC2=C3C=NC=N2)C2=NC=C(C)S2)C=C1  c:10,14,16,19,21,31,t:2,5,8,24,26      | Z8784060875 | 1{321} | Nc1nccc2ncc12                | 2{80}  | Cc1nc(C=O)s1        | 3{20} | COc1ccc([N+]#[C-])c(C)c1 | 0.0 | 0 |
| 537 | 4{260,69,14}  | COCCNC1=C(N=C2N1C=CC=C2N1CCCC1)C1=NN(C)C(C)=C1  c:7,11,13,27,t:5,22                                | Z8784060346 | 1{260} | Nc1ncccc1N2CCCC2             | 2{69}  | Cc1cc(C=O)mn1C      | 3{14} | COCC[N+]#[C-]            | 0.0 | 0 |
| 538 | 4{322,58,14}  | COCCNC1=C(N=C2N1C=CN=C2Br)C1=NSN=C1  c:7,11,13,20,t:5,17                                           | Z8780121564 | 1{322} | Nc1nccnc1Br                  | 2{58}  | O=Cc1cnsn1          | 3{14} | COCC[N+]#[C-]            | 0.0 | 0 |
| 539 | 4{22,15,9}    | CNC1=C(N=C2C=CC(Cl)=NN12)C1=CC=C(OC)C=C1  c:6,9,20,t:2,4,14,16                                     | Z8776690345 | 1{22}  | Nc1ccc(Cl)nn1                | 2{15}  | COc1ccc(C=O)cc1     | 3{9}  | C[N+]#[C-]               | 0.0 | 0 |

|     |               |                                                                                               |             |        |                       |        |                              |       |                          |     |   |
|-----|---------------|-----------------------------------------------------------------------------------------------|-------------|--------|-----------------------|--------|------------------------------|-------|--------------------------|-----|---|
| 540 | 4{323,14,17}  | CC1=CC=C(C=C1)C1=C(NCC2CCOCC2)N2C(C=CC=C2O)=N1  c:3,5,8,21,23,26,t:1                          | Z8711876680 | 1{323} | Nc1cccc(O)n1          | 2{14}  | Cc1ccc(C=O)cc1               | 3{17} | [C-]#[N+]CC1C COCC1      | 0.0 | 0 |
| 541 | 4{12,15,17}   | CCC1=CC2=NC(=C(NCC3CCOCC3)N2C=N1)C1=CC=C(OC)C=C1  c:19,28,t:2,4,6,22,24                       | Z8711876287 | 1{12}  | CCc1cc(N)n cn1        | 2{15}  | COc1ccc(C=O)cc1              | 3{17} | [C-]#[N+]CC1C COCC1      | 0.0 | 0 |
| 542 | 4{16,22,17}   | FC1=CN=CN2C(NCC3CCOCC3)=C(N=C12)C1=CC=CC=C1  c:3,15,23,25,t:1,17,21                           | Z8711876147 | 1{16}  | Nc1ncnc1F             | 2{22}  | O=Cc1cccc1                   | 3{17} | [C-]#[N+]CC1C COCC1      | 0.0 | 0 |
| 543 | 4{7,22,54}    | CC1=CN2C(NC3=CC=CC=C3)=C(N=C2N=C1)C1=CC=CC=C1  c:8,10,12,14,17,22,24,t:1,6,20                 | Z8711872483 | 1{7}   | Cc1nc(N)n c1          | 2{22}  | O=Cc1cccc1                   | 3{54} | [C-]#[N+]c1cccc1         | 0.0 | 0 |
| 544 | 4{11,15,14}   | COCCNC1=C(N=C2N=C(Cl)C=C(Cl)N12)C1=CC=C(OC)C=C1  c:24,t:5,7,9,12,18,20                        | Z8711872231 | 1{11}  | Nc1nc(Cl)c c(Cl)n1    | 2{15}  | COc1ccc(C=O)cc1              | 3{14} | COCC[N+]#[C-]            | 0.0 | 0 |
| 545 | 4{270,26,9}   | CNC1=C(CCC2=CC=CC=C2)N=C2C=CC3=N C=NN3N12  c:2,8,10,15,19,t:6,13,17                           | Z8741907041 | 1{270} | Nc1ccc2nnc n2n1       | 2{26}  | O=CCCc1ccc1                  | 3{9}  | C[N+]#[C-]               | 0.0 | 0 |
| 546 | 4{324,14,11}  | CC1=CC=C(C=C1)C1=C(NCC2=CC(Br)=CC=C2)N2C=CC(N)=CC2=N1  c:3,5,8,15,17,21,24,27,t:1,12          | Z8741906951 | 1{324} | Cl.Nc1ccnc(N)c1       | 2{14}  | Cc1ccc(C=O)cc1               | 3{11} | BrC1cccc(C[N+]#[C-])c1   | 0.0 | 0 |
| 547 | 4{325,22,20}  | COC1=CC(C)=C(NC2=C(N=C3C=C(O)C=CN23)C2=CC=CC=C2)C=C1  c:15,22,24,27,t:2,5,8,10,12,20          | Z8741906950 | 1{325} | Nc1cc(O)cc n1         | 2{22}  | O=Cc1cccc1                   | 3{20} | COc1ccc([N+]#[C-])c(C)c1 | 0.0 | 0 |
| 548 | 4{326,276,47} | COC(OC)C1=C(NC(C)C)N2C=C(Cl)C(Br)=C2=N1  c:5,16,19,t:12                                       | Z8801681844 | 1{326} | Nc1cc(Br)c(Cl)n1      | 2{276} | COC(OC)C=O                   | 3{47} | CC(C)[N+]#[C-]           | 0.0 | 0 |
| 549 | 4{240,277,37} | COC(=O)C1CC(C1)NC1=C(CC(NC(=O)OC(C)(C)C)C2CC2)N=C2C=CC(=CN12)C1=NNN=N1  c:10,28,30,38,t:26,35 | Z8801681828 | 1{240} | Nc1ccc(cn1)c2nn[nH]n2 | 2{277} | CC(C)(C)OC(=O)NC(CC(=O)C1CC1 | 3{37} | COC(=O)C1CC(C1)[N+]#[C-] | 0.0 | 0 |
| 550 | 4{327,170,27} | CCCCNC1=C(N=C2N1C=CC(C(=O)OC)=C2F)C1=NN(CC)N=N1  c:7,11,17,26,t:5,21                          | Z8797787109 | 1{327} | COC(=O)c1ccnc(N)c1F   | 2{170} | CCn1nnc(C=O)n1               | 3{27} | CCCC[N+]#[C-]            | 0.0 | 0 |
| 551 | 4{328,41,17}  | BrC1=C2C=CNC2=CN2C(NCC3CCOCC3)=C(N=C12)C1=NC=CC=C1  c:1,3,7,19,27,29,t:21,25                  | Z8797775508 | 1{328} | Nc1ncc2[nH]ccc2c1Br   | 2{41}  | O=Cc1ccccn1                  | 3{17} | [C-]#[N+]CC1C COCC1      | 0.0 | 0 |
| 552 | 4{113,278,6}  | CCOC(=O)CCNC1=C(N=C2N1C=CC=C2N1CCOCC1)C1=C(Br)N=NN1C  c:11,15,17,27,30,t:9                    | Z8803896969 | 1{113} | Nc1ncccc1N2CCOCC2     | 2{278} | Cn1nnc(Br)c1C=O              | 3{6}  | CCOC(=O)C CC[N+]#[C-]    | 0.0 | 0 |

|     |               |                                                                                                                        |             |        |                                  |        |                                        |       |                              |     |   |
|-----|---------------|------------------------------------------------------------------------------------------------------------------------|-------------|--------|----------------------------------|--------|----------------------------------------|-------|------------------------------|-----|---|
| 553 | 4{329,107,7}  | COC1=CC=C(C)C2=NC(=C(NC3CCOCC3)N12)C1=NC(C)=CS1  c:25,t:2,4,7,9,22                                                     | Z8803896940 | 1{329} | Cl.COc1ccc(C)c(N)n1              | 2{107} | Cc1csc(C=O)n1                          | 3{7}  | [C-]#[N+]C1CCOCC1            | 0.0 | 0 |
| 554 | 4{154,279,33} | COC1=C(CNC2=C(N=C3C=C(C=CN23)[N+]( [O-])=O)[C@@H]2CCCO[C@H]2C2=NC=CN2C)C=CC=C1  &1:18,23,r,c:2,10,12,29,34,36,t:6,8,27 | Z8808559896 | 1{154} | Nc1cc(cen1)[N+](=O)[O-]          | 2{279} | Cn1ccnc1[C@@H]2OCC[C@H]2C=O  &1:6,11,r | 3{33} | COc1ccccc1C[N+]#[C-]         | 0.0 | 0 |
| 555 | 4{330,250,1}  | CN(C)S(=O)(=O)C1=CN2C(C=C1)=NC(=C2N1CC1)C1=CN(C)N=C1Br  c:10,12,14,26,t:6,22                                           | Z8808559863 | 1{330} | CN(C)S(=O)(=O)c1ccc(N)nc1        | 2{250} | Cn1cc(C=O)c(Br)n1                      | 3{1}  | [C-]#[N+]C1CC1               | 0.0 | 0 |
| 556 | 4{331,280,49} | CN(C)CCN(C)CC1=CN2C(NC3CC(F)(F)C3)=C(N=C2C=C1)C1=NSC(=C1)[N+]( [O-])=O  c:19,21,24,30,t:8,27                           | Z8810903020 | 1{331} | Cl.Cl.Cl.CN(C)CCN(C)Cc1ccc(N)nc1 | 2{280} | [O-][N+](=O)c1cc(C=O)ns1               | 3{49} | FC1(F)CC(C1)[N+]#[C-]        | 0.0 | 0 |
| 557 | 4{332,281,21} | CCC1=CC=CN2C(NCC3CC3)=C(N=C12)C1=NN=C(C=C1)C(=O)OC  c:4,13,21,23,t:2,15,19                                             | Z8810902965 | 1{332} | CCc1cccn1N                       | 2{281} | COC(=O)c1ccc(C=O)nn1                   | 3{21} | [C-]#[N+]CC1CC1              | 0.0 | 0 |
| 558 | 4{41,266,9}   | CNC1=C(N=C2C=NC(C)=CN12)C1=CC(=CC=C1)C1=CN=C(C=C1)C#N  c:6,9,16,18,23,25,t:2,4,14,21                                   | Z8810902963 | 1{41}  | Cc1cnc(N)c n1                    | 2{266} | O=Cc1cccc(c1)c2ccc(C#N)nc2             | 3{9}  | C[N+]#[C-]                   | 0.0 | 0 |
| 559 | 4{35,79,9}    | CNC1=C(N=C2C=CC(C)=CN12)C1=NC=CO1  c:6,9,16,t:2,4,14                                                                   | Z8810902951 | 1{35}  | Cc1ccc(N)nc1                     | 2{79}  | O=Cc1ncco1                             | 3{9}  | C[N+]#[C-]                   | 0.0 | 0 |
| 560 | 4{256,126,44} | COC1=CC(=CC(F)=C1)C1=C(NCCCCNC(=O)OC(C)(C)N2N3N=NN=C3C=CC2=N1  c:4,7,10,27,29,32,35,t:2                                | Z8798985064 | 1{256} | Nc1ccc2nnn n2n1                  | 2{126} | COc1cc(F)cc(C=O)c1                     | 3{44} | CC(C)(C)OC(=O)NCCCC[N+]#[C-] | 0.0 | 0 |
| 561 | 4{333,282,8}  | COC(=O)C(CC1=CC=CC=C1)NC1=C(N=C2C=CC=C(N12)C1=CC=NC=C1)C1CC2(C1)OC CO2  c:8,10,18,20,27,29,t:6,14,16,25                | Z8798985059 | 1{333} | Nc1cccc(n1)c2cnc2                | 2{282} | O=CC1CC2(C1)OCCO2                      | 3{8}  | COC(=O)C(Cc1ccccc1)[N+]#[C-] | 0.0 | 0 |
| 562 | 4{146,283,12} | CS(=O)(=O)C1=CN2C(C=C1)=NC(=C2NCC1CCO1)C1=C2N=CC=CC2=CC=C1  c:8,10,12,23,25,27,30,32,t:4                               | Z8798985057 | 1{146} | CS(=O)(=O)c1ccc(N)nc1            | 2{283} | O=Cc1cccc2ccnc12                       | 3{12} | [C-]#[N+]CC1CCOCC1           | 0.0 | 0 |
| 563 | 4{192,182,14} | COCCNC1=C(N=C2N1C(F)=CC=C2C1)C1=NC=CN1CC#C  c:7,12,14,20,t:5,18                                                        | Z8798985056 | 1{192} | Nc1nc(F)cc1Cl                    | 2{182} | O=Cc1cncn1CC#C                         | 3{14} | COCC[N+]#[C-]                | 0.0 | 0 |

|     |               |                                                                                                     |             |        |                                             |        |                     |       |                             |     |   |
|-----|---------------|-----------------------------------------------------------------------------------------------------|-------------|--------|---------------------------------------------|--------|---------------------|-------|-----------------------------|-----|---|
| 564 | 4{334,284,7}  | CC1=C(N=CC=N1)C1=C(NC2CCOCC2)N2C=C3COCCC3=C(C#N)C2=N1<br> c:3,5,8,31,t:1,19,26                      | Z8798985047 | 1{334} | Nc1ncc2CO<br>CCc2c1C#<br>N                  | 2{284} | Cc1nccnc1C<br>=O    | 3{7}  | [C-]<br>]#[N+]C1CC<br>OCC1  | 0.0 | 0 |
| 565 | 4{335,27,58}  | CN1N=C(N=C1C)C1=C(NC2(C)CC2)N2C3=C(NC=C3)C=C(Br)C2=N1  c:2,4,8,20,27,t:17,23                        | Z8786958812 | 1{335} | Nc1nc2cc[n<br>H]c2cc1Br                     | 2{27}  | Cc1nc(C=O)<br>nn1C  | 3{58} | CC1(CC1)[N<br>+]#[C-]       | 0.0 | 0 |
| 566 | 4{336,44,17}  | CCN1C=C(C=N1)C1=C(NCC2CCOCC2)N2C(=N1)C(C1)=NC1=C2C=CC(=C1)[N+](=[O-])=O<br> c:3,5,8,20,24,26,29,31  | Z8786935772 | 1{336} | Nc1nc2ccc(<br>cc2nc1Cl)[<br>N+](=O)[O-<br>] | 2{44}  | CCn1cc(C=O)<br>)cn1 | 3{17} | [C-]<br>]#[N+]CC1C<br>COCC1 | 0.0 | 0 |
| 567 | 4{337,118,14} | COCCNC1=C(N=C2N1C=CC(Br)=C2Cl)C1=CC(C)=NC=C1  c:7,11,14,21,23,t:5,18                                | Z8786901713 | 1{337} | Nc1nccc(Br)<br>)c1Cl                        | 2{118} | Cc1cc(C=O)<br>ccn1  | 3{14} | COCC[N+]#[<br>C-]           | 0.0 | 0 |
| 568 | 4{338,170,6}  | CCOC(=O)CCCNC1=C(N=C2N1C=CC1=C2C=CN=C1)C1=NN(CC)N=N1<br> c:11,15,17,20,22,30,t:9,25                 | Z8778277874 | 1{338} | Nc1nccc2cn<br>ccc12                         | 2{170} | CCn1nnc(C=<br>O)n1  | 3{6}  | CCOC(=O)C<br>CC[N+]#[C-]    | 0.0 | 0 |
| 569 | 4{339,80,14}  | COCCNC1=C(N=C2N1C=CC1=C2C=CS1)C1=NC=C(C)S1  c:7,11,13,16,t:5,20,22                                  | Z8778277362 | 1{339} | Nc1nccc2sc<br>cc12                          | 2{80}  | Cc1enc(C=O)<br>)s1  | 3{14} | COCC[N+]#[<br>C-]           | 0.0 | 0 |
| 570 | 4{340,58,14}  | CCOC1=CC=CN2C(NCCOC)=C(N=C12)C1=NSN=C1  c:5,13,22,t:3,15,19                                         | Z8778277284 | 1{340} | CCOc1cccn<br>c1N                            | 2{58}  | O=Cc1cnsn1          | 3{14} | COCC[N+]#[<br>C-]           | 0.0 | 0 |
| 571 | 4{341,80,39}  | CCOCCNC1=C(N=C2C=CC(CN(C)C)=CN12)C1=NC=C(C)S1  c:10,16,t:6,8,21,23                                  | Z8781341769 | 1{341} | CN(C)Cc1c<br>cc(N)nc1                       | 2{80}  | Cc1enc(C=O)<br>)s1  | 3{39} | CCOCC[N+]<br>#[C-]          | 0.0 | 0 |
| 572 | 4{342,118,17} | CC1=NC=CC(=C1)C1=C(NCC2CCOCC2)N2C=CC3=C(C=CC(=C3)[N+](=[O-])=O)C2=N1<br> c:3,5,8,20,24,26,33,t:1,22 | Z8784060910 | 1{342} | Nc1nccc2cc<br>(ccc12)[N+]<br>(=O)[O-]       | 2{118} | Cc1cc(C=O)<br>ccn1  | 3{17} | [C-]<br>]#[N+]CC1C<br>COCC1 | 0.0 | 0 |
| 573 | 4{343,58,27}  | CCCCNC1=C(N=C2N1C=CC1=C2C=CO1)C1=NSN=C1  c:7,11,13,16,23,t:5,20                                     | Z8784060493 | 1{343} | Nc1nccc2oc<br>cc12                          | 2{58}  | O=Cc1cnsn1          | 3{27} | CCCC[N+]#[<br>C-]           | 0.0 | 0 |
| 574 | 4{344,58,14}  | COCCNC1=C(N=C2N1C=CC=C2SC)C1=NSN=C1  c:7,11,13,21,t:5,18                                            | Z8784059177 | 1{344} | CSc1ccnc1<br>N                              | 2{58}  | O=Cc1cnsn1          | 3{14} | COCC[N+]#[<br>C-]           | 0.0 | 0 |
| 575 | 4{26,22,14}   | COCCNC1=C(N=C2C=CC=C(N3CCCC3)N12)C1=CC=CC=C1  c:9,24,26,t:5,7,11,22                                 | Z8780122312 | 1{26}  | Nc1cccc(n1)<br>)N2CCCC2                     | 2{22}  | O=Cc1cccc<br>1      | 3{14} | COCC[N+]#[<br>C-]           | 0.0 | 0 |
| 576 | 4{345,41,17}  | BrC1=CN2C(NCC3CCOCC3)=C(N=C2C(Br)=N1)C1=NC=CC=C1  c:13,15,19,24,26,t:1,22                           | Z8780121691 | 1{345} | Nc1ncc(Br)<br>nc1Br                         | 2{41}  | O=Cc1cccn<br>1      | 3{17} | [C-]<br>]#[N+]CC1C<br>COCC1 | 0.0 | 0 |
| 577 | 4{188,14,14}  | COCCNC1=C(N=C2C=NC=C(N12)C(=O)OC)C1=CC=C(C)C=C1  c:9,11,25,t:5,7,20,22                              | Z8776690330 | 1{188} | COC(=O)c1<br>cncc(N)n1                      | 2{14}  | Cc1ccc(C=O)<br>)cc1 | 3{14} | COCC[N+]#[<br>C-]           | 0.0 | 0 |

|                                                                          |               |                                                                                                    |             |        |                          |        |                          |       |                      |       |    |
|--------------------------------------------------------------------------|---------------|----------------------------------------------------------------------------------------------------|-------------|--------|--------------------------|--------|--------------------------|-------|----------------------|-------|----|
| 578                                                                      | 4{1,22,27}    | CCCCNC1=C(N=C2C=CN12)C1=CC=CC=C1  c:9,17,19,t:5,7,15                                               | Z8711892168 | 1{1}   | Nc1cc[nH]n1              | 2{22}  | O=Cc1cccc1               | 3{27} | CCCC[N+][C-]         | 0.0   | 0  |
| 579                                                                      | 4{2,15,54}    | COC1=CC=C(C=C1)C1=C(NC2=CC=CC=C2)N2OC=CC2=N1  c:4,6,9,14,16,21,24,t:2,12                           | Z8711891895 | 1{2}   | Nc1ccn1                  | 2{15}  | COc1ccc(C=O)cc1          | 3{54} | [C-][N+]c1cccc1      | 0.0   | 0  |
| 580                                                                      | 4{346,15,9}   | CNC1=C(N=C2N1C=CN=C2C)C1=CC=C(OC)C=C1  c:4,8,10,20,t:2,14,16                                       | Z8741907202 | 1{346} | Cc1ncnc1N                | 2{15}  | COc1ccc(C=O)cc1          | 3{9}  | C[N+][C-]            | 0.0   | 0  |
| <i>Preliminary test experiments, Sc(OTf)<sub>3</sub> as the catalyst</i> |               |                                                                                                    |             |        |                          |        |                          |       |                      |       |    |
| 581                                                                      | 4{347,242,24} | COC1=CC(CNC2=C(N=C3C=CC(C1)=CN23)C2=CN3N=CC(C#N)=C3N=C2)=CC=C1  c:11,14,22,26,29,31,33,t:2,7,9,19  | Z8878918808 | 1{347} | Nc1ccc(Cl)cn1            | 2{242} | O=Cc1cnc2c(C#N)cnn2c1    | 3{24} | COc1ccc(C[N+][C-])c1 | 114.9 | 99 |
| 582                                                                      | 4{54,285,53}  | CN(C)C(=O)C1=CN2C(NCCOCC3=CC=CC=C3)=C(N=C2C=C1)C1=CSC(=C1)[N+](O)=O  c:16,18,20,22,25,31,t:5,14,28 | Z8878918446 | 1{54}  | Cl.CN(C)C(=O)c1ccc(N)nc1 | 2{285} | [O-][N+](=O)c1cc(C=O)cs1 | 3{53} | [C-][N+]CCOCc1cccc1  | 99.6  | 79 |
| 583                                                                      | 4{105,286,34} | NC(=O)C1=CC=CC2=NC(=C(NCC3CCCO3)N12)C1=NC=CC(=C1)C(F)(F)F  c:5,24,26,t:3,7,9,22                    | Z8878918833 | 1{105} | NC(=O)c1cccc(N)n1        | 2{286} | FC(F)(F)c1ccnc(C=O)c1    | 3{34} | [C-][N+]CC1COCO1     | 81.8  | 75 |
| 584                                                                      | 4{69,287,12}  | CNC(=O)C1=CC2=NC(=C(NCC3CCOC3)N2C=C1)C1=CC(OCCOC)=CC=C1  c:20,31,33,t:4,6,8,23                     | Z8878918860 | 1{69}  | CNC(=O)c1ccnc(N)c1       | 2{287} | COCCCOc1cccc(C=O)c1      | 3{12} | [C-][N+]CC1COCO1     | 82.5  | 70 |
| 585                                                                      | 4{348,288,39} | CCOCCNC1=C(N=C2C=NC(F)=CN12)C1=C(C=CCF)C=C1  c:10,13,25,t:6,8,18,20                                | Z8878918639 | 1{348} | Nc1cnc(F)cn1             | 2{288} | FCCc1ccc(C=O)cc1         | 3{39} | CCOCC[N+][C-]        | 60.2  | 68 |
| 586                                                                      | 4{349,110,69} | COC1=C(NC2=C(N=C3C=CC(Br)=C(C)N23)C2=CN=C(C=C2)P(C)(C)O)C=CC=C1  c:2,9,20,22,29,31,t:5,7,12,18     | Z8846492345 | 1{349} | Cc1nc(N)ccc1Br           | 2{110} | CP(=O)(C)c1cccc(C=O)cn1  | 3{69} | COc1cccc1[N+][C-]    | 88.3  | 67 |
| 587                                                                      | 4{153,289,22} | COC1=C(OCC#C)C=C(C=C1)C1=C(NC2COC2)N2C(C=CC=C2C(C)O)=N1  c:2,8,10,13,23,25,31                      | Z8873684876 | 1{153} | CC(C)(O)c1cccc(N)n1      | 2{289} | COc1ccc(C=O)cc1OCC#C     | 3{22} | [C-][N+]C1COC1       | 71.8  | 65 |
| 588                                                                      | 4{28,174,7}   | C(C1CCCO1)N1C=C(N=N1)C1=C(NC2CCOC2)N2C=CC(=CC2=N1)C1=NOC=N1  c:8,10,13,24,26,29,35,t:32            | Z8878918438 | 1{28}  | Cl.Nc1cc(ccn1)c2ncon2    | 2{174} | O=Cc1cn(CC2CCCO2)nn1     | 3{7}  | [C-][N+]C1CCOCC1     | 76.3  | 65 |
| 589                                                                      | 4{193,290,10} | CNC(=O)C1=CN2C(C=C1)=NC(=C2NC1CCO)C1=CC(OC2=NC=CC=C2)=CC=C1  c:8,10,12,28,30,32,34,t:4,22,26       | Z8878918325 | 1{193} | CNC(=O)c1cccc(N)nc1      | 2{290} | O=Cc1cccc(Oc2cccn2)c1    | 3{10} | [C-][N+]C1CCOC1      | 74.8  | 65 |



|     |               |                                                                                                          |             |        |                                |        |                                      |       |                                      |      |    |
|-----|---------------|----------------------------------------------------------------------------------------------------------|-------------|--------|--------------------------------|--------|--------------------------------------|-------|--------------------------------------|------|----|
| 590 | 4{41,30,13}   | COC1=CC=C(CNC2=C(N=C3C=NC(C)=CN2)3)C2CCN(CC2)C(C)=O)C=C1<br> c:12,15,30,t:2,4,8,10                       | Z8873684727 | 1{41}  | Cc1cnc(N)c<br>n1               | 2{30}  | CC(=O)NIC<br>CC(CC1)C=<br>O          | 3{13} | COc1ccc(C[<br>N+]#[C-])cc1           | 67.7 | 64 |
| 591 | 4{107,291,24} | COC1=CC(CNC2=C(N=C3C=CC(OCCO)=CN2)3)C2=C(C)C(OC)=CN=C2)=CC=C1<br> c:11,17,22,27,29,31,33,t:2,7,9         | Z8878918508 | 1{107} | Nc1ccc(OC<br>CO)cn1            | 2{291} | COc1cnc(C<br>=O)c1C                  | 3{24} | COc1cccc(C[<br>N+]#[C-])c1           | 74.7 | 64 |
| 592 | 4{107,292,21} | CC1=C(SC=N1)C1=C(NCC2CC2)N2C=C(OC<br>CO)C=CC2=N1  c:4,7,22,25,t:1,16                                     | Z8873684602 | 1{107} | Nc1ccc(OC<br>CO)cn1            | 2{292} | Cc1ncsc1C=<br>O                      | 3{21} | [C-<br>]#[N+]CC1C<br>C1              | 57.6 | 62 |
| 593 | 4{108,139,21} | CCCOC1=CN2C(C=C1)=NC(=C2NCC1CC1)<br>C1=C(C)N(CCO)N=C1C  c:8,10,12,21,28,t:4                              | Z8873684946 | 1{108} | CCCOc1ccc<br>(N)cn1            | 2{139} | Cc1nn(CCO)<br>c(C)c1C=O              | 3{21} | [C-<br>]#[N+]CC1C<br>C1              | 63.0 | 61 |
| 594 | 4{347,171,49} | COC1CC(C(OC)O1)C1=C(NC2CC(F)(F)C2)N<br>2C=C(Cl)C=CC2=N1  c:10,24,27,t:21                                 | Z8873685323 | 1{347} | Nc1ccc(Cl)c<br>n1              | 2{171} | COC1CC(C=<br>O)C(OC)O1               | 3{49} | FC1(F)CC(C<br>1)[N+]#[C-]            | 60.9 | 58 |
| 595 | 4{350,293,5}  | COCCNC1=C(N=C2C=NC(=CN12)C1=CC=<br>CC=C1)C1=C(F)N(C)N=C1<br> c:10,12,19,21,24,29,t:6,8,17                | Z8873684623 | 1{350} | Nc1cnc(en1)<br>c2ccccc2        | 2{293} | Cn1ccc(C=O<br>)c1F                   | 3{5}  | COCCC[N+]<br>#[C-]                   | 59.7 | 58 |
| 596 | 4{267,294,23} | COC(=O)CCC(NC1=C(N=C2C=CC=C(C#C)N<br>12)C1=C(OC)C(=O)C=CO1)C(=O)OC<br> c:12,21,27,t:8,10,14              | Z8878918868 | 1{267} | Nc1cccc(C#<br>C)n1             | 2{294} | COc1c(C=O)<br>occc1=O                | 3{23} | COC(=O)CC<br>C([N+]#[C-<br>])C(=O)OC | 68.7 | 58 |
| 597 | 4{81,112,9}   | CNC1=C(N=C2C=NC=CN12)C1=C2C=CC=N<br>N2N=C1  c:6,8,13,15,17,21,t:2,4                                      | Z8873685319 | 1{81}  | Nc1cncn1                       | 2{112} | O=Cc1cnn2n<br>cccc12                 | 3{9}  | C[N+]#[C-]                           | 41.3 | 58 |
| 598 | 4{95,295,31}  | CSCCNC1=C(N=C2C=CC(=CN12)C(F)F)C1=<br>CSC(C)=N1  c:9,11,23,t:5,7,19                                      | Z8873684632 | 1{95}  | Nc1ccc(en1)<br>C(F)F           | 2{295} | Cc1nc(C=O)<br>cs1                    | 3{31} | CSCC[N+]#[<br>C-]                    | 55.0 | 57 |
| 599 | 4{351,296,44} | CC(C)(C)OC(=O)NCCCCNC1=C(N=C2C=CC<br>3=C(C(O)CC3)N12)C1=CN(CCF)N=C1<br> c:17,35,t:13,15,19,29            | Z8878918517 | 1{351} | Nc1ccc2CC<br>C(O)c2n1          | 2{296} | FCCn1cc(C=<br>O)cn1                  | 3{44} | CC(C)(C)OC<br>(=O)NCCCC<br>[N+]#[C-] | 72.7 | 57 |
| 600 | 4{118,124,31} | COC1=C(OCC2=C(C)ON=C2)C=CC(=C1)C<br>1=C(NCCSC)N2C(C=CC=C2C(C)O)=N1<br> c:2,6,10,14,16,19,28,30,35        | Z8854581141 | 1{118} | Cl.CC(O)c1<br>cccc(N)n1        | 2{124} | COc1cc(C=O<br>)ccc1OCc2c(<br>C)noc2C | 3{31} | CSCC[N+]#[<br>C-]                    | 73.8 | 57 |
| 601 | 4{28,297,26}  | CCN1N=C(C)C(=N1)C1=C(NCC2=CC=C(F)C<br>=C2)N2C=CC(=CC2=N1)C1=NOC=N1<br> c:6,9,18,22,24,27,33,t:3,13,15,30 | Z8846491885 | 1{28}  | Cl.Nc1cc(cc<br>n1)c2ncon2      | 2{297} | CCn1nc(C)c(<br>C=O)n1                | 3{26} | Fc1ccc(C[N+]<br>#[C-])cc1            | 64.0 | 57 |
| 602 | 4{142,298,12} | CS(=O)(=O)CCOC1=CC=CN2C(NCC3CCOC<br>3)=C(CCCC3=CC=CC=C3)N=C12<br> c:9,27,29,t:7,20,25,32                 | Z8873684783 | 1{142} | CS(=O)(=O)<br>CCOc1ccc<br>nc1N | 2{298} | O=CCCCc1c<br>cccc1                   | 3{12} | [C-<br>]#[N+]CC1C<br>COC1            | 69.9 | 57 |

|     |               |                                                                                                       |             |        |                            |        |                                         |       |                                   |      |    |
|-----|---------------|-------------------------------------------------------------------------------------------------------|-------------|--------|----------------------------|--------|-----------------------------------------|-------|-----------------------------------|------|----|
| 603 | 4{153,299,15} | CCNC1=C(N=C2C=CC=C(N12)C(C)(C)O)C1=C(OC)C(OC)=CC=C1F  c:7,9,18,24,26,t:3,5                            | Z8873684819 | 1{153} | CC(C)(O)c1cccc(N)n1        | 2{299} | COc1ccc(F)c(C=O)c1OC                    | 3{15} | CC[N+]#[C-]                       | 56.6 | 56 |
| 604 | 4{105,300,29} | CCOC(=O)CCNC1=C(CC2CN(C2)C(=O)OC(C)(C)C)N=C2C=CC=C(N12)C(N)=O  c:8,25,27,t:23                         | Z8855739218 | 1{105} | NC(=O)c1cccc(N)n1          | 2{300} | CC(C)(C)OC(=O)N1CC(C=C=O)C1             | 3{29} | CCOC(=O)C[C[N+]#[C-]              | 67.3 | 56 |
| 605 | 4{352,301,49} | CNC(=O)C1=C(F)C=CC(=C1)C1=C(NC2CC(F)(F)C2)N2C=C(C=CC2=N1)N1CCN(C)C(=O)C1  c:4,7,9,12,23,25,28         | Z8873684938 | 1{352} | CN1CCN(C1=O)c2ccc(N)nc2    | 2{301} | CNC(=O)c1cc(C=O)ccc1F                   | 3{49} | FC1(F)CC(C1)[N+]#[C-]             | 73.5 | 56 |
| 606 | 4{91,302,7}   | NC(=O)C1=CN2C(C=C1)=NC([C@@H]1C[C@@H]1C1=CC=C(F)C=C1)=C2NC1CCOCC1  &1:11,13,r,c:7,9,21,23,t:3,16,18   | Z8829498723 | 1{91}  | NC(=O)c1ccc(N)nc1          | 2{302} | Fc1ccc(cc1)[C@@H]2C[C@@H]2C=O  &1:7,9,r | 3{7}  | [C-]#[N+]C1CCOCC1                 | 59.4 | 56 |
| 607 | 4{67,284,13}  | COC1=CC=C(CNC2=C(N=C3C=CC=C(C)N23)C2=C(C)N=CC=N2)C=C1  c:12,20,23,25,28,t:2,4,8,10,14                 | Z8878918440 | 1{67}  | Cc1cccc(N)n1               | 2{284} | Cc1cccnc1C=O                            | 3{13} | COc1ccc(C[N+]#[C-])cc1            | 53.6 | 55 |
| 608 | 4{267,303,23} | COC(=O)CCC(NC1=C(N=C2C=CC=C(C#C)N12)C1=C(C)C(=C(OC)C=C1)[N+][[O-]]=O)C(=O)OC  c:12,21,28,t:8,10,14,24 | Z8854581183 | 1{267} | Nc1cccc(C#C)n1             | 2{303} | COc1ccc(C=O)c(C)c1[N+](=O)[O-]          | 3{23} | COC(=O)CC(C([N+]#[C-])C(=O)OC     | 71.7 | 55 |
| 609 | 4{124,304,43} | CC1=C(C=NN1CC(F)F)C1=C(NC2CCN(CC2)C(=O)OC(C)(C)C)N2C=CC=C(CO)C2=N1  c:3,11,29,36,t:1,31               | Z8878918512 | 1{124} | Nc1cccc1CO                 | 2{304} | Cc1c(C=O)cnn1CC(F)F                     | 3{43} | CC(C)(C)OC(=O)N1CCC(CC1)[N+]#[C-] | 73.1 | 55 |
| 610 | 4{52,189,7}   | FC(F)(F)C1(CC1)C1=CN2C(C=C1)=NC(C1=CN(N=N1)C1CCOCC1)=C2NC1CCOCC1  c:12,14,20,29,t:8,17                | Z8878918380 | 1{52}  | Nc1ccc(cn1)C2(CC2)C(F)(F)F | 2{189} | O=Cc1cn(nn1)C2CCOCC2                    | 3{7}  | [C-]#[N+]C1CCOCC1                 | 71.0 | 55 |
| 611 | 4{353,223,15} | CCNC1=C(N=C2C=CC(NS(C)(=O)=O)=CN12)C1=CN=C(C=C1)C(=O)OC  c:7,14,21,23,t:3,5,19                        | Z8878918898 | 1{353} | Cl.CS(=O)(=O)Nc1ccc(N)nc1  | 2{223} | Cl.COC(=O)c1ccc(C=O)c1n1                | 3{15} | CC[N+]#[C-]                       | 57.9 | 55 |
| 612 | 4{354,305,70} | COCC1=NC(=CN1)C1=C(NC2CCN(C2)C(=O)OC(C)(C)C)N2C=C(C=CC2=N1)C(=O)OC  c:5,9,26,28,31,t:3                | Z8855619579 | 1{354} | COC(=O)c1ccc(N)nc1         | 2{305} | COCC1nc(C=O)c[nH]1                      | 3{70} | CC(C)(C)OC(=O)N1CCC(C1)[N+]#[C-]  | 69.9 | 55 |
| 613 | 4{144,306,47} | CNS(=O)(=O)C1=CN2C(C=C1)=NC(=C2NC(C)C)C1=CC=C(C=C1)N(C)CCO  c:9,11,13,22,24,t:5,20                    | Z8855739270 | 1{144} | CNS(=O)(=O)c1ccc(N)nc1     | 2{306} | CN(CCO)c1ccc(C=O)cc1                    | 3{47} | CC(C)[N+]#[C-]                    | 61.8 | 55 |

|     |               |                                                                                               |             |        |                                    |        |                                   |       |                                     |      |    |
|-----|---------------|-----------------------------------------------------------------------------------------------|-------------|--------|------------------------------------|--------|-----------------------------------|-------|-------------------------------------|------|----|
| 614 | 4{41,307,9}   | CNC1=C(N=C2C=NC(C)=CN12)C1=CN=C(C)N1C  c:6,9,t:2,4,14,16                                      | Z8849597811 | 1{41}  | Cc1cnc(N)c<br>n1                   | 2{307} | Cn1c(Cl)ncc<br>1C=O               | 3{9}  | C[N+]#[C-]                          | 40.9 | 55 |
| 615 | 4{50,308,31}  | CSCCNC1=C(CCC2CCCC2)N=C2C=CC=C(N12)P(C)(C)=O  c:5,17,19,t:15                                  | Z8873685271 | 1{50}  | CP(=O)(C)c<br>1cccc(N)n1           | 2{308} | O=CCCC1C<br>CCC1                  | 3{31} | CSCC[N+]#[<br>C-]                   | 56.1 | 55 |
| 616 | 4{54,309,47}  | CC(C)NC1=C(N=C2C=CC(=CN12)C(=O)N(C)C)C1=CC=C(C=C1)N1C=CC=N1  c:8,10,22,24,28,30,t:4,6,20      | Z8829498465 | 1{54}  | Cl.CN(C)C(<br>=O)c1ccc(N<br>)nc1   | 2{309} | O=Cc1ccc(cc<br>1)n2cccn2          | 3{47} | CC(C)[N+]#[<br>C-]                  | 57.4 | 55 |
| 617 | 4{52,310,7}   | FC(F)(F)C1(CC1)C1=CN2C(C=C1)=NC(C1C)COC3(CCC3)C1)=C2NC1CCOCC1  c:12,14,27,t:8                 | Z8878918339 | 1{52}  | Nc1ccc(en1<br>)C2(CC2)C(<br>F)(F)F | 2{310} | O=CC1CCO<br>C2(CCC2)C1            | 3{7}  | [C-<br>]#[N+]C1CC<br>OCC1           | 66.2 | 55 |
| 618 | 4{49,84,13}   | COC1=CC=C(CNC2=C(CCSC)N=C3C=CC=C(CO)N23)C=C1  c:8,16,25,t:2,4,14,18                           | Z8855739168 | 1{49}  | Nc1cccc(C<br>O)n1                  | 2{84}  | CSCCC=O                           | 3{13} | COc1ccc(C[<br>N+]#[C-])cc1          | 52.5 | 54 |
| 619 | 4{355,93,22}  | CC(C)C1=CC=CC2=NC(=C(NC3COC3)N12)C1=NC(CO)=CC=C1  c:5,24,26,t:3,7,9,20                        | Z8873684910 | 1{355} | CC(C)c1ccc<br>c(N)n1               | 2{93}  | OCc1cccc(C<br>=O)n1               | 3{22} | [C-<br>]#[N+]C1CO<br>C1             | 49.6 | 54 |
| 620 | 4{351,311,39} | CCOCCNC1=C(N=C2C=CC3=C(C(O)CC3)N12)C1=NN(CC(F)(F)F)C=C1Br  c:10,30,t:6,8,12,22                | Z8855739266 | 1{351} | Nc1ccc2CC<br>C(O)c2n1              | 2{311} | FC(F)(F)Cn1<br>cc(Br)c(C=O<br>)n1 | 3{39} | CCOCC[N+]#<br>[C-]                  | 71.5 | 54 |
| 621 | 4{356,312,8}  | COC(=O)C(CC1=CC=CC=C1)NC1=C(N=C2C=CC(C1)=C(N12)C(=O)N(C)C)C1CCOC1(C)C  c:8,10,18,21,t:6,14,16 | Z8846491967 | 1{356} | CN(C)C(=O)<br>c1nc(N)ccc<br>1Cl    | 2{312} | CC1(C)OCC<br>C1C=O                | 3{8}  | COC(=O)C(<br>Cc1cccc1)[<br>N+]#[C-] | 72.5 | 54 |
| 622 | 4{357,175,49} | OCC1CCN(CC1)C1=CN2C(NC3CC(F)(F)C3)=C(N=C2C=C1)C1=NNC=C1  c:20,22,25,31,t:9,28                 | Z8873685388 | 1{357} | Nc1ccc(en1<br>)N2CCC(C<br>O)CC2    | 2{175} | O=Cc1cc[nH<br>]n1                 | 3{49} | FC1(F)CC(C<br>1)[N+]#[C-]           | 58.4 | 54 |
| 623 | 4{53,236,42}  | CC1=C(NC2=C(CCC3OCCO3)N=C3C=CC(CO)=CN23)C=CC=C1  c:1,4,16,20,25,27,t:14                       | Z8837933178 | 1{53}  | Nc1ccc(CO)<br>cn1                  | 2{236} | O=CCCC1O<br>CCO1                  | 3{42} | Cc1cccc1[N<br>+]#[C-]               | 51.0 | 53 |
| 624 | 4{48,313,22}  | COC1=CC2=C(C=C1)N(C)C=C2C1=C(NC2C)OC2)N2C=CC(=CC2=N1)S(C)(=O)=O  c:4,6,11,14,23,25,28,t:2     | Z8878918334 | 1{48}  | CS(=O)(=O)<br>c1ccnc(N)c<br>1      | 2{313} | COc1ccc2n(<br>C)cc(C=O)c2<br>c1   | 3{22} | [C-<br>]#[N+]C1CO<br>C1             | 62.4 | 53 |
| 625 | 4{69,314,46}  | CNC(=O)C1=CC2=NC(C3=CN=C3)=C(NCC(C)=C)N2C=C1  c:12,23,t:4,6,9,14                              | Z8878918522 | 1{69}  | CNC(=O)c1<br>ccnc(N)c1             | 2{314} | O=Cc1cn[nH<br>]c1                 | 3{46} | CC(=C)C[N+]<br>]#[C-]               | 44.3 | 53 |
| 626 | 4{118,82,18}  | COC1=C(C=CC=C1F)C1=C(NC(C)(C)C)N2C(C=CC=C2C(C)O)=N1  c:4,6,10,19,21,26,t:2                    | Z8873685369 | 1{118} | Cl.CC(O)c1<br>cccc(N)n1            | 2{82}  | COc1c(F)ccc<br>c1C=O              | 3{18} | CC(C)(C)[N<br>+]#[C-]               | 51.0 | 53 |

|     |               |                                                                                                    |             |        |                            |        |                            |       |                         |      |    |
|-----|---------------|----------------------------------------------------------------------------------------------------|-------------|--------|----------------------------|--------|----------------------------|-------|-------------------------|------|----|
| 627 | 4{49,52,13}   | COC1=CC=C(CNC2=C(N=C3C=CC=C(CO)N23)C2=CN(N=C2)C2CCC2)C=C1<br> c:12,24,32,t:2,4,8,10,14,21          | Z8873684618 | 1{49}  | Nc1cccc(CO)n1              | 2{52}  | O=Cc1enn(c1)C2CCC2         | 3{13} | COc1cccc(C[N+]#[C-])cc1 | 57.4 | 53 |
| 628 | 4{193,4,12}   | CNC(=O)C1=CN2C(C=C1)=NC(=C2NCC1CCOC1)C1=C(C1)C=CC=C1C1<br> c:8,10,12,23,26,28,t:4                  | Z8855739153 | 1{193} | CNC(=O)c1ccc(N)nc1         | 2{4}   | Clc1cccc(Cl)c1C=O          | 3{12} | [C-]#[N+]CC1COC1        | 59.6 | 53 |
| 629 | 4{193,315,12} | CCCN1C=CC(=N1)C1=C(NCC2CCOC2)N2C=C(C=CC2=N1)C(=O)NC<br> c:4,6,9,20,22,25                           | Z8854581159 | 1{193} | CNC(=O)c1ccc(N)nc1         | 2{315} | CCCN1ccc(C=O)n1            | 3{12} | [C-]#[N+]CC1COC1        | 54.3 | 53 |
| 630 | 4{358,316,22} | COC(=O)C1=CC2=C(C=C1)N=C(C=C2)C1=C(NC2COC2)N2C=CC(=CC2=N1)C(C)(C)O<br> c:6,8,11,13,16,25,27,30,t:4 | Z8846491841 | 1{358} | CC(C)(O)c1ccnc(N)c1        | 2{316} | COC(=O)c1ccc2nc(C=O)ccc2c1 | 3{22} | [C-]#[N+]C1CO C1        | 61.4 | 53 |
| 631 | 4{92,317,14}  | CCN1N=CC(=N1)C1=C(NCCOC)N2C=CC(=CC2=N1)C(N)=O<br> c:3,5,8,16,18,21                                 | Z8873685381 | 1{92}  | NC(=O)c1ccnc(N)c1          | 2{317} | CCN1ccc(C=O)n1             | 3{14} | COCC[N+]#[C-]           | 46.7 | 53 |
| 632 | 4{359,318,22} | FC(F)OC1=CN2C(C=C1)=NC(C1CC11CC1(F)F)=C2NC1COC1<br> c:8,10,21,t:4                                  | Z8878918410 | 1{359} | Nc1ccc(OC(F)F)cn1          | 2{318} | FC1(F)CC21CC2C=O           | 3{22} | [C-]#[N+]C1CO C1        | 49.9 | 53 |
| 633 | 4{71,319,10}  | CC1=C(C=CC(OCC#N)=C1)C1=C(NC2CCOC2)N2C=C(I)N=CC2=N1<br> c:3,9,12,25,28,t:1,22                      | Z8855739134 | 1{71}  | Nc1cnc(I)en1               | 2{319} | Cc1cc(OCC#N)ccc1C=O        | 3{10} | [C-]#[N+]C1CCOC1        | 67.2 | 52 |
| 634 | 4{113,62,14}  | COCCNC1=C(N=C2N1C=CC=C2N1CCOCC1)C1CC11CCOCC1<br> c:7,11,13,t:5                                     | Z8878918357 | 1{113} | Nc1ncccc1N2CCOCC2          | 2{62}  | O=CC1CC21CCOCC2            | 3{14} | COCC[N+]#[C-]           | 54.6 | 52 |
| 635 | 4{360,320,29} | CCOC(=O)CCNC1=C(N=C2C=C(C(=O)OC)C(Br)=CN12)C1=NN(C)C=N1<br> c:19,28,t:8,10,12,24                   | Z8878918308 | 1{360} | COC(=O)c1cc(N)nc1Br        | 2{320} | Cn1cnc(C=O)n1              | 3{29} | CCOC(=O)C[C[N+]#[C-]    | 63.7 | 52 |
| 636 | 4{352,103,47} | CC(C)NC1=C(N=C2C=CC(=CN12)N1CCN(C)C(=O)C1)C1CCC2(COC2)OC1<br> c:8,10,t:4,6                         | Z8849597817 | 1{352} | CN1CCN(C1=O)c2ccc(N)nc2    | 2{103} | O=CC1CCC2(COC2)OC1         | 3{47} | CC(C)[N+]#[C-]          | 58.4 | 52 |
| 637 | 4{261,321,12} | CN(C)C1CCN(CC1)C1=CN2C(C=C1)=NC(C1CC11CCC(F)(F)CC1)=C2NCC1CCOC1<br> c:14,16,30,t:10                | Z8873685382 | 1{261} | CN(C)C1CCN(CC1)c2ccc(N)nc2 | 2{321} | FC1(F)CCC2((CC2C=O)C1      | 3{12} | [C-]#[N+]CC1COC1        | 68.6 | 52 |
| 638 | 4{37,139,24}  | COC1=CC(CNC2=C(N=C3C=CC=C(C(F)F)N23)C2=C(C)N(CCO)N=C2C)=CC=C1<br> c:11,21,28,31,33,t:2,7,9,13      | Z8878918891 | 1{37}  | Cl.Nc1cccc(n1)C(F)F        | 2{139} | Cc1nn(CCO)c(C)c1C=O        | 3{24} | COc1cccc(C[N+]#[C-])c1  | 62.1 | 52 |
| 639 | 4{180,155,53} | COC(=O)C1=CC2=NC(=C(NCCOCC3=CC=C(C=C3)N2C=C1C)C1=CN=CN=C1<br> c:17,19,24,30,32,t:4,6,8,15,28       | Z8803896942 | 1{180} | COC(=O)c1cc(N)nc1C         | 2{155} | O=Cc1cncnc1                | 3{53} | [C-]#[N+]CCOCC1cccc1    | 58.7 | 52 |

|     |               |                                                                                                 |             |        |                          |        |                                    |       |                                   |      |    |
|-----|---------------|-------------------------------------------------------------------------------------------------|-------------|--------|--------------------------|--------|------------------------------------|-------|-----------------------------------|------|----|
| 640 | 4{87,322,23}  | COC(=O)CCC(NC1=C(N=C2C=C(C)C(Cl)=C(N12)C1=CC(NC(C)=O)=CC=C1)C(=O)OC c:16,27,29,t:8,10,12,21     | Z8873684717 | 1{87}  | Cc1cc(N)nc1Cl            | 2{322} | CC(=O)Nc1ccc(C=O)c1                | 3{23} | COC(=O)CC(C[N+]#[C-])C(=O)OC      | 66.5 | 52 |
| 641 | 4{311,220,61} | CC1=C(C(C)=NN1)C1=C(NCCCNC(=O)OC(C)(C)C)N2C=CC(F)=CC2=N1 c:4,8,23,26,29,t:1                     | Z8878918419 | 1{311} | Nc1cc(F)ccn1             | 2{220} | Cc1n[nH]c(C)c1C=O                  | 3{61} | CC(C)(C)OC(=O)NCCC[N+]#[C-]       | 56.6 | 52 |
| 642 | 4{361,323,12} | CC(C)OC1=CC=CN2C(NCC3CCOC3)=C(N=C12)[C@@H]1C[C@@H](C1)NC(=O)OC(C)(C)C r,c:6,17,t:4,19           | Z8846492360 | 1{361} | Cl.CC(C)Oc1ccnc1N        | 2{323} | CC(C)(C)OC(=O)N[C@H]1C[C@H](C1)C=O | 3{12} | [C-]#[N+]CC1COC1                  | 62.2 | 52 |
| 643 | 4{120,324,70} | CN1C=C(C=N1)C1=CC2=NC(C3CC4(C3)CCCO4)=C(NC3CCN(C3)C(=O)OC(C)(C)C)N2C=C1 c:2,4,39,t:7,9,21       | Z8829498458 | 1{120} | Cn1cc(en1)c2ccnc(N)c2    | 2{324} | O=CC1CC2(C1)CCCO2                  | 3{70} | CC(C)(C)OC(=O)N1CCC(C1)[N+]#[C-]  | 68.6 | 52 |
| 644 | 4{193,325,21} | CNC(=O)C1=CN2C(C=C1)=NC(CCN1C(=O)C3=C(C=CC=C3)C1=O)=C2NCC1CC1 c:8,10,20,22,27,t:4,18            | Z8878918490 | 1{193} | CNC(=O)c1ccc(N)nc1       | 2{325} | O=CCCN1C(=O)c2ccccc2C1=O           | 3{21} | [C-]#[N+]CC1CC1                   | 58.1 | 52 |
| 645 | 4{362,326,10} | CNC(=O)C1=CC=CC2=NC(=C(NC3CCOC3)N12)C1=CC=NN1C c:6,24,t:4,8,10,22                               | Z8873684581 | 1{362} | CNC(=O)c1cccc(N)n1       | 2{326} | Cn1cccc1C=O                        | 3{10} | [C-]#[N+]C1CCOC1                  | 47.3 | 51 |
| 646 | 4{109,327,29} | CCOC(=O)CCNC1=C(N=C2C=CC=C(N12)S(N)(=O)=O)C1=NC(Cl)=CC(Cl)=C1 c:12,14,26,29,t:8,10,23           | Z8855739173 | 1{109} | Cl.Nc1cccc(n1)S(=O)(=O)N | 2{327} | Clc1cc(Cl)nc(C=O)c1                | 3{29} | CCOC(=O)CC[N+]#[C-]               | 63.4 | 51 |
| 647 | 4{107,328,43} | CCC1=NNC=C1C1=C(NC2CCN(CC2)C(=O)OC(C)(C)C)N2C=C(OCCO)C=CC2=N1 c:5,8,32,35,t:2,26                | Z8873685371 | 1{107} | Nc1ccc(OCO)en1           | 2{328} | Cl.CCc1n[nH]cc1C=O                 | 3{43} | CC(C)(C)OC(=O)N1CCC(CC1)[N+]#[C-] | 65.0 | 51 |
| 648 | 4{363,329,62} | COC(=O)C1=CC2=NC(=C(NC3(CCCC3)C(=O)OC)N2C=C1)C1=C(C)N(CCC1)N=C1C c:23,26,33,t:4,6,8             | Z8878918904 | 1{363} | COC(=O)c1ccnc(N)c1       | 2{329} | Cc1nn(CCC1)c(C)c1C=O               | 3{62} | COC(=O)C1(CCCC1)[N+]#[C-]         | 65.4 | 51 |
| 649 | 4{364,330,62} | COC(=O)C1(CCCC1)NC1=C(N=C2C=CC(=C(N12)N1CCNC(=O)C1)C1=C(OC)C(Cl)=NC=C1 c:15,17,30,35,37,t:11,13 | Z8849597816 | 1{364} | Nc1ccc(en1)N2CCNC(=O)C2  | 2{330} | COc1c(Cl)nc1C=O                    | 3{62} | COC(=O)C1(CCCC1)[N+]#[C-]         | 68.8 | 51 |
| 650 | 4{48,331,35}  | CSCCCNC1=C(N=C2C=C(C=CN12)S(C)(=O)=O)C1=CC2=C(OCCNC2=O)C=C1 c:10,12,32,t:6,8,21,23              | Z8873685336 | 1{48}  | CS(=O)(=O)c1ccnc(N)c1    | 2{331} | O=Cc1ccc2OCCNC(=O)c2c1             | 3{35} | CSCCC[N+]#[C-]                    | 63.4 | 51 |

|     |               |                                                                                              |             |        |                                |        |                                 |       |                           |      |    |
|-----|---------------|----------------------------------------------------------------------------------------------|-------------|--------|--------------------------------|--------|---------------------------------|-------|---------------------------|------|----|
| 651 | 4{113,246,14} | COCCNC1=C(N=C2N1C=CC=C2N1CCOCC1)C1CC11CCCOC1  c:7,11,13,t:5                                  | Z8878918399 | 1{113} | Nc1ncccc1<br>N2CCOCC2          | 2{246} | O=CC1CC21<br>CCCOC2             | 3{14} | COCC[N+]#[C-]             | 53.2 | 51 |
| 652 | 4{36,46,9}    | CNC1=C(CCCCOCC)N=C2C=CC(Br)=CN12  c:2,13,16,t:11                                             | Z8873684758 | 1{36}  | Nc1ccc(Br)<br>cn1              | 2{46}  | COCCCCC<br>=O                   | 3{9}  | C[N+]#[C-]                | 44.7 | 51 |
| 653 | 4{327,332,34} | COC(=O)C1=C(F)C2=NC(=C(NCC3CCCO3)N2C=C1)C1=CN(CC2CC2)N=C1  c:4,21,32,t:7,9,24                | Z8878918569 | 1{327} | COC(=O)c1<br>ccnc(N)c1F        | 2{332} | O=Cc1cnn(C<br>C2CC2)c1          | 3{34} | [C-]<br>#[N+]CC1C<br>CCO1 | 56.6 | 51 |
| 654 | 4{358,333,15} | CCNC1=C(N=C2C=C(C=CN12)C(C)(C)O)C1CCC2(CC(C2)(OC)OC)CC1  c:7,9,t:3,5                         | Z8878918336 | 1{358} | CC(C)(O)c1<br>ccnc(N)c1        | 2{333} | COCC1(CC2(C1)CCC(CC2)C=O)OC     | 3{15} | CC[N+]#[C-]               | 54.5 | 50 |
| 655 | 4{66,99,22}   | COCCC1=CC2=NC(=C(NC3COC3)N2C=C1)C1=COC=N1  c:18,24,t:4,6,8,21                                | Z8873684845 | 1{66}  | COCCc1ccn<br>c(N)c1            | 2{99}  | O=Cc1cocn1                      | 3{22} | [C-]<br>#[N+]C1CO<br>C1   | 42.4 | 50 |
| 656 | 4{365,334,10} | CC1=C(N=CO1)C1=C(NC2CCOC2)N2C(C=C(C)C=C2C)=N1  c:3,7,21,24,t:1,18                            | Z8878918832 | 1{365} | Cc1cc(C)nc<br>(N)c1            | 2{334} | Cc1ocnc1C=<br>O                 | 3{10} | [C-]<br>#[N+]C1CC<br>OC1  | 42.0 | 50 |
| 657 | 4{366,134,12} | COCC1=NC(=NC=C1)C1=C(NCC2CCOC2)N2C=CC=C(OC)C2=N1  c:4,6,9,20,27,t:2,22                       | Z8873684742 | 1{366} | COc1ccnc<br>1N                 | 2{134} | COc1ccnc(C<br>=O)n1             | 3{12} | [C-]<br>#[N+]CC1C<br>COC1 | 47.8 | 50 |
| 658 | 4{367,335,34} | CC1=CN2C(NCC3CCCO3)=C(N=C2C(=C1)C#C)C1=CN(N=C1)C1CCOCC1  c:12,14,17,25,t:1,22                | Z8873685329 | 1{367} | Cc1cnc(N)c<br>(C#C)c1          | 2{335} | O=Cc1cnn(c<br>1)C2CCOCC<br>2    | 3{34} | [C-]<br>#[N+]CC1C<br>CCO1 | 54.5 | 50 |
| 659 | 4{166,336,32} | COCC1=NSC=C1C1=C(NC2CCC2)N2C=CC(CSCCO)=CC2=N1  c:5,8,17,24,27,t:2                            | Z8873684839 | 1{166} | Nc1cc(CSC<br>CO)ccn1           | 2{336} | COc1nsc1C<br>=O                 | 3{32} | [C-]<br>#[N+]C1CC<br>C1   | 52.5 | 50 |
| 660 | 4{368,337,49} | CN1C=C(C=N1)C1=C(C)N2C(C=C1)=NC(=C2N1CC(F)(F)C1)C1=CN(C)C(=O)N(C)C1=O  c:2,4,7,12,14,16,t:27 | Z8873684788 | 1{368} | Cc1nc(N)cc<br>c1c2cnn(C)<br>c2 | 2{337} | Cn1cc(C=O)<br>c(=O)n(C)c1<br>=O | 3{49} | FC1(F)CC(C<br>1)[N+]#[C-] | 61.1 | 50 |
| 661 | 4{92,338,7}   | CC1=C(OC=C1)C1=C(NC2CCOCC2)N2C=C(C=CC2=N1)C(N)=O  c:4,7,18,20,23,t:1                         | Z8878918819 | 1{92}  | NC(=O)c1c<br>cnc(N)c1          | 2{338} | Cc1ccoc1C=<br>O                 | 3{7}  | [C-]<br>#[N+]C1CC<br>OCC1 | 45.6 | 50 |
| 662 | 4{164,328,24} | CCC1=NNC=C1C1=C(NCC2=CC(OC)=CC=C2)N2C=CC(CN(C)C)=CC2=N1  c:5,8,16,18,22,28,31,t:2,12         | Z8873684947 | 1{164} | CN(C)Cc1c<br>cnc(N)c1          | 2{328} | Cl.CCC1n[nH]<br>]cc1C=O         | 3{24} | COc1cccc(C<br>N+)#[C-]c1  | 54.1 | 50 |

|     |               |                                                                                                                 |             |        |                            |        |                                     |       |                             |      |    |
|-----|---------------|-----------------------------------------------------------------------------------------------------------------|-------------|--------|----------------------------|--------|-------------------------------------|-------|-----------------------------|------|----|
| 663 | 4{351,339,67} | CCC(C)NC1=C(N=C2C=CC3=C(C(O)CC3)N12)C1=NN=C(N1)C(F)(F)F  c:9,23,t:5,7,11,21                                     | Z8878918810 | 1{351} | Nc1ccc2CC(O)c2n1           | 2{339} | FC(F)(F)c1nnc(C=O)[nH]1             | 3{67} | CCC(C)[N+]#[C-]             | 50.9 | 50 |
| 664 | 4{103,165,40} | CCOC(=O)C1=CC=C(NC2=C(N=C3C=NC=C(CO)N23)C2=NN(C=C2)[C@H]2[C@@H](C2)C(=O)OC)C=C1  r,c:14,26,38,t:5,7,10,12,16,23 | Z8878918652 | 1{103} | Nc1cnc(CO)n1               | 2{165} | COC(=O)[C@H]1C[C@@H](C1)n2cc(C=O)n2 | 3{40} | CCOC(=O)c1ccc([N+]#[C-])cc1 | 65.6 | 50 |
| 665 | 4{369,340,18} | CCN1C=NC(=N1)C1=C(NC(C)(C)C)N2C=C(C=CC2=N1)C(F)C(F)(F)F  c:3,5,8,16,18,21                                       | Z8878918892 | 1{369} | Cl.Nc1ccc(cn1)C(F)C(F)(F)F | 2{340} | CCn1cnc(C=O)n1                      | 3{18} | CC(C)(C)[N+]#[C-]           | 51.1 | 49 |
| 666 | 4{348,341,39} | CCOCCNC1=C(N=C2C=NC(F)=CN12)C1=CN=C(S1)C(C)O  c:10,13,20,t:6,8,18                                               | Z8878918626 | 1{348} | Nc1cnc(F)c n1              | 2{341} | CC(O)c1ncc(C=O)s1                   | 3{39} | CCOCC[N+]#[C-]              | 51.1 | 49 |
| 667 | 4{54,36,22}   | CN(C)C(=O)C1=CN2C(C=C1)=NC(=C2NC1COC1)C1=NC(C)=C(OC(F)F)C=C1  c:9,11,13,31,t:5,22,25                            | Z8846491870 | 1{54}  | Cl.CN(C)C(=O)c1ccc(N)nc1   | 2{36}  | Cc1nc(C=O)ccc1OC(F)F                | 3{22} | [C-]#[N+]C1COC1             | 55.1 | 49 |
| 668 | 4{366,342,12} | COC1=CC=CN2C(NCC3CCOC3)=C(N=C12)C1=CN=C(S1)C1=NC=CC=C1  c:4,15,23,29,31,t:2,17,21,27                            | Z8873684850 | 1{366} | COc1cccnc1N                | 2{342} | O=Cc1cnc(s1)c2cccn2                 | 3{12} | [C-]#[N+]CC1COC1            | 53.7 | 49 |
| 669 | 4{370,343,10} | COC1=C(Br)C=CN2C(NC3CCOC3)=C(N=C12)C1C(C)C1Cl  c:2,5,15,t:17                                                    | Z8854581178 | 1{370} | COc1c(N)nc cclBr           | 2{343} | CC1C(Cl)C1C=O                       | 3{10} | [C-]#[N+]C1CCOC1            | 52.7 | 49 |
| 670 | 4{113,344,6}  | CCOC(=O)CCNC1=C(N=C2N1C=CC=C2N1CCOCC1)C1=C(C)C=NN1COC  c:11,15,17,27,30,t:9                                     | Z8873685396 | 1{113} | Nc1ncccc1N2CCOCC2          | 2{344} | COc1nccc(C)c1C=O                    | 3{6}  | CCOC(=O)C CC[N+]#[C-]       | 59.8 | 49 |
| 671 | 4{50,174,7}   | CP(C)(=O)C1=CC=CC2=NC(=C(NC3CCOCC3)N12)C1=CN(CC2CCCO2)N=N1  c:6,33,t:4,8,10,23                                  | Z8849597810 | 1{50}  | CP(=O)(C)c1ccc(N)n1        | 2{174} | O=Cc1cn(CC2CCCO2)nn1                | 3{7}  | [C-]#[N+]C1CCOCC1           | 58.2 | 49 |
| 672 | 4{105,300,34} | CC(C)(C)OC(=O)N1CC(CC2=C(NCC3CCCO3)N3C(C=CC=C3C(N)=O)=N2)C1  c:11,23,25,30                                      | Z8878918635 | 1{105} | NC(=O)c1c ccc(N)n1         | 2{300} | CC(C)(C)OC(=O)N1CC(C=C=O)C1         | 3{34} | [C-]#[N+]CC1COCO1           | 55.9 | 48 |
| 673 | 4{54,138,53}  | CN(C)C(=O)C1=CN2C(C=C1)=NC(=C2NCCOCC1=CC=CC=C1)C1=NC(C)=NC(C)=C1  c:9,11,13,23,25,31,34,t:5,21,28               | Z8873684825 | 1{54}  | Cl.CN(C)C(=O)c1ccc(N)nc1   | 2{138} | Cc1cc(C=O)nc(C)n1                   | 3{53} | [C-]#[N+]CCOCC1cccc1        | 57.5 | 48 |
| 674 | 4{369,203,7}  | FC(F)CN1C=CC(=N1)C1=C(NC2CCOCC2)N2C=C(C=CC2=N1)C(F)C(F)(F)F  c:5,7,10,21,23,26                                  | Z8878918909 | 1{369} | Cl.Nc1ccc(cn1)C(F)C(F)(F)F | 2{203} | FC(F)Cn1ccc(C=O)n1                  | 3{7}  | [C-]#[N+]C1CCOCC1           | 57.7 | 48 |

|     |               |                                                                                                 |             |        |                       |        |                                   |       |                           |      |    |
|-----|---------------|-------------------------------------------------------------------------------------------------|-------------|--------|-----------------------|--------|-----------------------------------|-------|---------------------------|------|----|
| 675 | 4{48,345,22}  | COC1=CC(C2=C(NC3COC3)N3C=CC(=CC3=N2)S(C)(=O)=O)=C(F)C=C1<br> c:5,14,16,19,28,t:2,25             | Z8878918335 | 1{48}  | CS(=O)(=O)c1ccnc(N)c1 | 2{345} | COc1ccc(F)c(C=O)c1                | 3{22} | [C-]<br>#[N+]C1CO<br>C1   | 49.4 | 48 |
| 676 | 4{371,164,10} | CN1N=C(C2=C1CCOC2)C1=C(NC2CCOC2)N2C=CC=C(OCCCC#N)C2=N1<br> c:2,4,12,22,33,t:24                  | Z8873685339 | 1{371} | Nc1ncccc1OCCCC#N      | 2{164} | Cn1nc(C=O)c2COCCc21               | 3{10} | [C-]<br>#[N+]C1CC<br>OC1  | 54.4 | 48 |
| 677 | 4{327,346,34} | CCN(C)C(=O)C1=CC=C(C=C1)C1=C(NCC2C<br>CCO2)N2C=CC(C(=O)OC)=C(F)C2=N1<br> c:8,10,13,24,34,t:6,30 | Z8878918338 | 1{327} | COC(=O)c1ccnc(N)c1F   | 2{346} | CCN(C)C(=O)c1ccc(C=O)cc1          | 3{34} | [C-]<br>#[N+]CC1C<br>CCO1 | 58.5 | 48 |
| 678 | 4{187,70,12}  | CC(F)(F)C1=NC(=CS1)C1=C(NCC2CCOC2)N2C=C(Cl)C(=CC2=N1)C#N<br> c:6,10,24,27,t:4,21                | Z8878918511 | 1{187} | Nc1cc(C#N)c(Cl)cn1    | 2{70}  | CC(F)(F)c1nc(C=O)cs1              | 3{12} | [C-]<br>#[N+]CC1C<br>COC1 | 54.6 | 48 |
| 679 | 4{125,122,31} | CSCCNC1=C(N=C2C=CC(CCO)=CN12)C1=CN=C(N=C1)C1=CC=CS1<br> c:9,14,21,23,28,t:5,7,19,26             | Z8873684811 | 1{125} | Nc1ccc(CC O)cn1       | 2{122} | O=Cc1enc(n c1)c2cccs2             | 3{31} | CSCC[N+]#[C-]             | 53.0 | 48 |
| 680 | 4{92,347,18}  | CCCN1C=C(N=N1)C1=C(NC(C)(C)C)N2C=C(C=CC2=N1)C(N)=O  c:4,6,9,17,19,22                            | Z8855739156 | 1{92}  | NC(=O)c1ccnc(N)c1     | 2{347} | CCCN1cc(C=O)nn1                   | 3{18} | CC(C)(C)[N+]#[C-]         | 43.9 | 48 |
| 681 | 4{347,139,21} | CC1=NN(CCO)C(C)=C1C1=C(NCC2CC2)N2C=C(Cl)C=CC2=N1  c:8,11,23,26,t:1,20                           | Z8873685465 | 1{347} | Nc1ccc(Cl)cn1         | 2{139} | Cc1nn(CCO)c(C)c1C=O               | 3{21} | [C-]<br>#[N+]CC1C<br>C1   | 46.2 | 48 |
| 682 | 4{372,314,46} | CC(=C)CNC1=C(N=C2N1C=CC=C2OCC1=C<br>C=NC=C1)C1=CNN=C1<br> c:7,11,13,20,22,28,t:5,18,25          | Z8873684836 | 1{372} | Nc1ncccc1OCe2ccncc2   | 2{314} | O=Cc1cn[nH]c1                     | 3{46} | CC(=C)C[N+]#[C-]          | 46.0 | 47 |
| 683 | 4{79,30,13}   | COC1=CC=C(CNC2=C(N=C3C=NC=C(C)N23)C2CCN(CC2)C(C)=O)C=C1<br> c:12,30,t:2,4,8,10,14               | Z8878918306 | 1{79}  | Cc1cncc(N)n1          | 2{30}  | CC(=O)N1C<br>CC(CC1)C=O           | 3{13} | COc1ccc(C[N+]#[C-])cc1    | 50.0 | 47 |
| 684 | 4{48,348,22}  | CC(C)(C)OC(=O)N1CC2CCC1C(C2)C1=C(NC2COC2)N2C=CC(=CC2=N1)S(C)(=O)=O<br> c:17,26,28,31            | Z8878918482 | 1{48}  | CS(=O)(=O)c1ccnc(N)c1 | 2{348} | CC(C)(C)OC(=O)N1CC2CCC1C(C2)C=O   | 3{22} | [C-]<br>#[N+]C1CO<br>C1   | 64.6 | 47 |
| 685 | 4{48,345,15}  | CCNC1=C(N=C2C=C(C=CN12)S(C)(=O)=O)C1=C(F)C=CC(OC)=C1  c:7,9,18,21,25,t:3,5                      | Z8878918575 | 1{48}  | CS(=O)(=O)c1ccnc(N)c1 | 2{345} | COc1ccc(F)c(C=O)c1                | 3{15} | CC[N+]#[C-]               | 46.0 | 47 |
| 686 | 4{367,349,34} | CC1=CN2C(NCC3CCCO3)=C(N=C2C(=C1)C#C)C1C[C@H]2OC(C)(C)O[C@H]2C1<br> c:12,14,17,t:1               | Z8873684754 | 1{367} | Cc1cnc(N)c(C#C)c1     | 2{349} | CC1(C)O[C@@@H]2CC(C[C@@@H]2O1)C=O | 3{34} | [C-]<br>#[N+]CC1C<br>CCO1 | 50.0 | 47 |



|     |               |                                                                                                 |             |        |                             |        |                             |       |                                   |      |    |
|-----|---------------|-------------------------------------------------------------------------------------------------|-------------|--------|-----------------------------|--------|-----------------------------|-------|-----------------------------------|------|----|
| 687 | 4{293,350,12} | COC1=CC(C)=CN2C(NCC3CCOC3)=C(N=C12)C1C2CCOCC12  c:5,16,t:2,18                                   | Z8873684691 | 1{293} | COc1cc(C)cnc1N              | 2{350} | O=CC1C2CCOCC12              | 3{12} | [C-]#[N+]CC1COC1                  | 44.9 | 47 |
| 688 | 4{373,351,39} | CCOCCNC1=C(CCCSC)N=C2C=CC(CNC(=O)OC(C)(C)C)=CN12  c:6,15,26,t:13                                | Z8878918621 | 1{373} | CC(C)(C)OC(=O)NCc1ccc(N)nc1 | 2{351} | CSCCCC=O                    | 3{39} | CCOCC[N+]#[C-]                    | 54.2 | 46 |
| 689 | 4{230,198,34} | CCC1=NN(C)C=C1C1=C(NCC2CCCO2)N2C=C(Br)C=C(C(C)O)C2=N1  c:6,9,29,t:2,20,23                       | Z8810902957 | 1{230} | CC(O)c1cc(Br)cnc1N          | 2{198} | CCc1nn(C)cc1C=O             | 3{34} | [C-]#[N+]CC1COCO1                 | 56.1 | 46 |
| 690 | 4{374,352,70} | COCCCC1=C(NC2CCN(C2)C(=O)OC(C)(C)C)N2C(C=CC=C2C(=O)OC)=N1  c:5,23,25,31                         | Z8878918489 | 1{374} | COC(=O)c1cccc(N)n1          | 2{352} | COCCCC=O                    | 3{70} | CC(C)(C)OC(=O)N1CCCC(C1)[N+]#[C-] | 54.0 | 46 |
| 691 | 4{375,139,10} | CC(C)OC1=CN=CC2=NC(=C(NC3CCOC3)N12)C1=C(C)N(CCO)N=C1C  c:6,22,29,t:4,8,10                       | Z8873684781 | 1{375} | CC(C)Oe1cncc(N)n1           | 2{139} | Cc1nn(CCO)c(C)c1C=O         | 3{10} | [C-]#[N+]C1CCOC1                  | 50.0 | 46 |
| 692 | 4{150,223,35} | COC(=O)C1=NC=C(C=C1)C1=C(NCCCSC)N2C=CC(=CC2=N1)C1CCOC1  c:6,8,11,20,22,25,t:4                   | Z8855619591 | 1{150} | Nc1cc(cen1)C2CCOC2          | 2{223} | Cl.COC(=O)c1ccc(C=O)cnc1    | 3{35} | CSCCC[N+]#[C-]                    | 53.0 | 46 |
| 693 | 4{167,353,23} | COC(=O)CCC(NC1=C(N=C2N1C(C)=CN=C2C)C1=C(CF)C=CC=C1)C(=O)OC  c:10,15,17,21,25,27,t:8             | Z8878918618 | 1{167} | Cc1enc(C)c(N)n1             | 2{353} | FCc1cccc1C=O                | 3{23} | COC(=O)CC(C([N+]#[C-]))C(=O)OC    | 53.2 | 46 |
| 694 | 4{77,354,5}   | COCCNC1=C(N=C2C=CC(=CN12)C1=CN=CC=C1)C1=C(C=CC=C1)P(C)(C)=O  c:10,12,19,21,26,28,t:6,8,17,24    | Z8873684627 | 1{77}  | Nc1ccc(en1)c2cccn2          | 2{354} | CP(=O)(C)c1cccc1C=O         | 3{5}  | COCCC[N+]#[C-]                    | 53.8 | 46 |
| 695 | 4{206,62,14}  | COCCNC1=C(N=C2N1C=CC(I)=C2F)C1CC11CCOCC1  c:7,11,14,t:5                                         | Z8873684638 | 1{206} | Nc1nccc(I)c1F               | 2{62}  | O=CC1CC21CCOCC2             | 3{14} | COCC[N+]#[C-]                     | 55.1 | 46 |
| 696 | 4{353,355,15} | CCNC1=C(N=C2C=CC(NS(C)=O)=O)=CN12)C1=C(CCNC(=O)OC(C)(C)OC)=N1  c:7,14,19,32,t:3,5               | Z8873684671 | 1{353} | Cl.CS(=O)(=O)Nc1ccc(N)nc1   | 2{355} | CC(C)(C)OC(=O)NCCc1ocnc1C=O | 3{15} | CC[N+]#[C-]                       | 57.1 | 46 |
| 697 | 4{69,242,61}  | CNC(=O)C1=CC2=NC(=C(NCCCNC(=O)OC(C)(C)C)N2C=C1)C1=CN2N=CC(C#N)=C2N=C1  c:24,30,34,37,t:4,6,8,27 | Z8873685295 | 1{69}  | CNC(=O)c1ccnc(N)c1          | 2{242} | O=Cc1cnc2c(C#N)cnn2c1       | 3{61} | CC(C)(C)OC(=O)NCCC[N+]#[C-]       | 60.0 | 45 |
| 698 | 4{50,356,18}  | CC(C)CN1C=C(N=N1)C1=C(NC(C)(C)C)N2C(C=CC=C2P(C)(C)=O)=N1  c:5,7,10,19,21,27                     | Z8873684868 | 1{50}  | CP(=O)(C)c1cccc(N)n1        | 2{356} | CC(C)Cn1cc(C=O)nn1          | 3{18} | CC(C)(C)[N+]#[C-]                 | 47.5 | 45 |

|     |               |                                                                                                           |             |        |                                  |        |                                            |       |                                 |      |    |
|-----|---------------|-----------------------------------------------------------------------------------------------------------|-------------|--------|----------------------------------|--------|--------------------------------------------|-------|---------------------------------|------|----|
| 699 | 4{109,357,50} | CCC1=C(C(C)=NO1)C1=C(NC2=CC3=C(OC<br>CO3)C=C2)N2C(C=CC=C2S(N)(=O)=O)=N1<br> c:5,9,21,26,28,34,t:2,12,14   | Z8878918305 | 1{109} | Cl.Nc1cccc(<br>n1)S(=O)(=<br>O)N | 2{357} | CCc1onc(C)c<br>1C=O                        | 3{50} | [C-<br>]#[N+]c1ccc<br>2OCCOc2c1 | 55.6 | 45 |
| 700 | 4{113,358,14} | COCCNC1=C(N=C2N1C=CC=C2N1CCOCC1<br>)C1CC11CCN(C1)C(=O)OC(C)(C)C<br> c:7,11,13,t:5                         | Z8878918398 | 1{113} | Nc1cccc1<br>N2CCOCC2             | 2{358} | CC(C)(C)OC<br>(=O)N1CCC<br>2(CC2C=O)<br>C1 | 3{14} | COCC[N+]#<br>C-]                | 57.4 | 45 |
| 701 | 4{48,359,22}  | COC1=CC(=CC(=C1)C1=C(NC2COC2)N2C=<br>CC(=CC2=N1)S(C)(=O)=O)C(F)(F)F<br> c:4,6,9,18,20,23,t:2              | Z8873684872 | 1{48}  | CS(=O)(=O<br>)c1ccnc(N)c<br>1    | 2{359} | COc1cc(C=O<br>)cc(c1)C(F)(<br>F)F          | 3{22} | [C-<br>]#[N+]C1CO<br>C1         | 53.3 | 45 |
| 702 | 4{47,195,26}  | COC1=C(F)C=C(C=N1)C1=C(NCC2=CC=C(F)<br>)C=C2)N2C=CC(=CC2=N1)S(N)(=O)=O<br> c:2,5,7,10,19,23,25,28,t:14,16 | Z8849597834 | 1{47}  | Cl.Nc1cc(cc<br>n1)S(=O)(=<br>O)N | 2{195} | COc1ncc(C=<br>O)cc1F                       | 3{26} | Fc1ccc(C[N+<br>]#[C-])cc1       | 53.5 | 44 |
| 703 | 4{376,360,12} | COC1=NC(Cl)=CN2C(NCC3CCOC3)=C(N=C<br>12)C1=C2N=CN(C)C2=CC=C1<br> c:5,16,22,24,29,31,t:2,18                | Z8873684704 | 1{376} | COc1nc(Cl)<br>cnc1N              | 2{360} | Cn1enc2c(C<br>=O)cccc12                    | 3{12} | [C-<br>]#[N+]CC1C<br>COC1       | 49.4 | 44 |
| 704 | 4{38,7,9}     | CNC1=C(N=C2C=C(C=CN12)C#N)C1=NC(C<br>)=CC(CO)=C1  c:6,8,18,22,t:2,4,15                                    | Z8873685471 | 1{38}  | Nc1cc(C#N<br>)ccn1               | 2{7}   | Cc1cc(CO)cc<br>(C=O)n1                     | 3{9}  | C[N+]#[C-]                      | 35.0 | 44 |
| 705 | 4{91,361,7}   | NC(=O)C1=CN2C(C=C1)=NC(=C2NC1CCOC<br>C1)C1=C(Br)C=CC(Br)=N1<br> c:7,9,11,22,25,28,t:3                     | Z8873685278 | 1{91}  | NC(=O)c1c<br>cc(N)nc1            | 2{361} | Brc1ccc(Br)c<br>(C=O)n1                    | 3{7}  | [C-<br>]#[N+]C1CC<br>OCC1       | 59.0 | 44 |
| 706 | 4{104,362,39} | CCOCCNC1=C(N=C2C=CC3=C(COCC3)N12<br>)C1=CC(OC)=C(OC)C(OC)=C1<br> c:10,32,t:6,8,12,22,26                   | Z8846492263 | 1{104} | Nc1ccc2CC<br>OCc2n1              | 2{362} | COc1cc(C=O<br>)cc(OC)c1O<br>C              | 3{39} | CCOCC[N+]<br>#[C-]              | 50.3 | 44 |
| 707 | 4{54,93,22}   | CN(C)C(=O)C1=CN2C(C=C1)=NC(=C2NC1C<br>OC1)C1=NC(CO)=CC=C1<br> c:9,11,13,26,28,t:5,22                      | Z8829498567 | 1{54}  | Cl.CN(C)C(<br>=O)c1ccc(N<br>)nc1 | 2{93}  | OCc1cccc(C<br>=O)n1                        | 3{22} | [C-<br>]#[N+]C1CO<br>C1         | 43.0 | 43 |
| 708 | 4{193,169,12} | CNC(=O)C1=CN2C(C=C1)=NC(=C2NCC1CC<br>OC1)C1=NNC2=C1N=CC=C2<br> c:8,10,12,26,29,31,t:4,23                  | Z8803896944 | 1{193} | CNC(=O)c1<br>ccc(N)nc1           | 2{169} | O=Cc1n[nH]<br>c2cccnc12                    | 3{12} | [C-<br>]#[N+]CC1C<br>COC1       | 45.8 | 43 |
| 709 | 4{79,307,13}  | COC1=CC=C(CNC2=C(N=C3C=NC=C(C)N2<br>3)C2=CN=C(Cl)N2C)C=C1<br> c:12,28,t:2,4,8,10,14,20,22                 | Z8855739194 | 1{79}  | Cc1nccc(N<br>n1)                 | 2{307} | Cn1c(Cl)ncc<br>1C=O                        | 3{13} | COc1ccc(C[<br>N+]#[C-])cc1      | 44.3 | 43 |
| 710 | 4{62,363,6}   | CCOC(=O)CCNC1=C(N=C2C=C(CO)C=CN<br>12)C1=CNC(C)=N1  c:17,26,t:9,11,13,22                                  | Z8878918835 | 1{62}  | Nc1cc(CO)c<br>cn1                | 2{363} | Cc1nc(C=O)<br>c[nH]1                       | 3{6}  | CCOC(=O)C<br>CC[N+]#[C-]        | 41.0 | 42 |

|     |               |                                                                                                        |             |        |                       |        |                       |       |                                  |      |    |
|-----|---------------|--------------------------------------------------------------------------------------------------------|-------------|--------|-----------------------|--------|-----------------------|-------|----------------------------------|------|----|
| 711 | 4{99,364,66}  | CC(NC1=C(CCC2CCCO2)N=C2C=CC(=CN12)S(N)(=O)=O)C1=CC=CC=C1<br> c:3,15,17,28,30,t:13,26                   | Z8873685354 | 1{99}  | Nc1ccc(en1)S(=O)(=O)N | 2{364} | O=CCCC1C<br>CCO1      | 3{66} | CC([N+]#[C-])c1cccc1             | 47.5 | 42 |
| 712 | 4{139,365,10} | FC(F)C1=CC2=NC(=C(NC3CCOC3)N2C=C1)C1=NNC2=C1C=NC=C2<br> c:18,24,27,29,t:3,5,7,21                       | Z8873684877 | 1{139} | Nc1cc(ccn1)C(F)F      | 2{365} | O=Cc1n[nH]c2ccncc12   | 3{10} | [C-]#[N+]C1CCOC1                 | 41.9 | 42 |
| 713 | 4{92,366,26}  | CCN1C=NC(=C1)C1=C(NCC2=CC=C(F)C=C2)N2C=CC(=CC2=N1)C(N)=O<br> c:3,5,8,17,21,23,26,t:12,14               | Z8878918679 | 1{92}  | NC(=O)c1ccnc(N)c1     | 2{366} | CCn1cnc(C=O)c1        | 3{26} | Fc1ccc(C[N+]#[C-])cc1            | 42.6 | 42 |
| 714 | 4{101,89,6}   | CCOC(=O)CCCN1=C(N=C2N1C=C(CO)C=C2C1)C1=CN=C(CC)N=C1<br> c:11,19,29,t:9,15,23,25                        | Z8873685362 | 1{101} | Nc1ncc(CO)cc1C1       | 2{89}  | CCc1ncc(C=O)cn1       | 3{6}  | CCOC(=O)C<br>CC[N+]#[C-]         | 46.8 | 41 |
| 715 | 4{179,42,5}   | COCCCN1=C(N=C2C=C(OC)C=CN12)C1=CN(C)N=C1C1  c:14,23,t:6,8,10,19                                        | Z8878918672 | 1{179} | COc1ccnc(N)c1         | 2{42}  | Cn1cc(C=O)c(Cl)n1     | 3{5}  | COCCC[N+]#[C-]                   | 39.2 | 41 |
| 716 | 4{377,367,12} | NC(=O)C1=CC(=CC=C1)C1=C(NCC2CCOC2)N2C=CC=C(OCC(F)F)C2=N1<br> c:5,7,10,21,31,t:3,23                     | Z8854581151 | 1{377} | Nc1ncccc1OCC(F)F      | 2{367} | NC(=O)c1ccc(C=O)c1    | 3{12} | [C-]#[N+]CC1C<br>COC1            | 46.6 | 41 |
| 717 | 4{127,320,29} | CCOC(=O)CCNC1=C(N=C2N1C=CC=C2F)C1=NN(C)C=N1  c:10,14,16,24,t:8,20                                      | Z8878918360 | 1{127} | Nc1ncccc1F            | 2{320} | Cn1cnc(C=O)n1         | 3{29} | CCOC(=O)C<br>C[N+]#[C-]          | 37.2 | 41 |
| 718 | 4{32,11,18}   | CC(C)(C)NC1=C(N=C2C=C(C=CN12)P(C)(C)=O)C1=NN(CC(F)(F)F)C=C1<br> c:9,11,28,t:5,7,20                     | Z8878918527 | 1{32}  | CP(=O)(C)c1ccnc(N)c1  | 2{11}  | FC(F)(F)Cn1ccc(C=O)n1 | 3{18} | CC(C)(C)[N+]#[C-]                | 46.2 | 41 |
| 719 | 4{377,368,12} | CC1=C(C)N=NC(=C1)C1=C(NCC2CCOC2)N2C=CC=C(OCC(F)F)C2=N1<br> c:1,4,6,9,20,30,t:22                        | Z8846492294 | 1{377} | Nc1ncccc1OCC(F)F      | 2{368} | Cc1cc(C=O)mc1C        | 3{12} | [C-]#[N+]CC1C<br>COC1            | 45.1 | 41 |
| 720 | 4{378,369,24} | COC1=CC(CNC2=C(N=C3N2C=CC=C3OCC2=CN=CC=C2)C2=CON=C2C)=CC=C1<br> c:9,13,15,22,24,30,33,35,t:2,7,20,27   | Z8878918644 | 1{378} | Nc1ncccc1OCc2ccncc2   | 2{369} | Cc1nocc1C=O           | 3{24} | COc1cccc(C[N+]#[C-])c1           | 49.2 | 41 |
| 721 | 4{73,370,20}  | CNC(=O)C1=CC=C(C=C1)C1=C(NC2=C(C)C=C(OC)C=C2)N2N3C=CN=C3C=CC2=N1<br> c:6,8,11,14,21,26,28,31,34,t:4,17 | Z8873684621 | 1{73}  | Nc1ccc2nccn2n1        | 2{370} | CNC(=O)c1ccc(C=O)cc1  | 3{20} | COc1ccc([N+]#[C-])c(C)c1         | 47.2 | 41 |
| 722 | 4{267,371,23} | COC(=O)CCC(NC1=C(N=C2C=CC=C(C#C)N12)C1=C(C)C(OC)=CC=N1)C(=O)OC<br> c:12,21,26,28,t:8,10,14             | Z8878918809 | 1{267} | Nc1cccc(C#C)n1        | 2{371} | COc1ccnc(C=O)c1C      | 3{23} | COC(=O)CC<br>C([N+]#[C-])C(=O)OC | 48.3 | 41 |
| 723 | 4{50,11,18}   | CC(C)(C)NC1=C(N=C2C=CC=C(N12)P(C)(C)=O)C1=NN(CC(F)(F)F)C=C1<br> c:9,11,28,t:5,7,20                     | Z8878918561 | 1{50}  | CP(=O)(C)c1cccc(N)n1  | 2{11}  | FC(F)(F)Cn1ccc(C=O)n1 | 3{18} | CC(C)(C)[N+]#[C-]                | 45.7 | 41 |

|     |               |                                                                                                       |             |        |                                    |        |                                                |       |                                   |      |    |
|-----|---------------|-------------------------------------------------------------------------------------------------------|-------------|--------|------------------------------------|--------|------------------------------------------------|-------|-----------------------------------|------|----|
| 724 | 4{105,185,41} | COC1=CC=C(NC2=C(N=C3C=CC=C(N23)C(N)=O)C2=CN(C)C=N2)C=C1<br> c:11,13,25,28,t:2,4,7,9,21                | Z8855619757 | 1{105} | NC(=O)c1c<br>ccc(N)n1              | 2{185} | Cn1cnc(C=O)<br>c1                              | 3{41} | COc1ccc([N+]<br>#[C-])cc1         | 40.1 | 41 |
| 725 | 4{188,372,62} | COC(=O)C1=CN=CC2=NC(=C(NC3(CCCC3)C(=O)OC)N12)C1=NN(C)N=C1C<br> c:6,30,t:4,8,10,26                     | Z8873684844 | 1{188} | COC(=O)c1<br>cncc(N)n1             | 2{372} | Cc1nn(C)nc1<br>C=O                             | 3{62} | COC(=O)C1(<br>CCCC1)[N+]<br>#[C-] | 45.3 | 41 |
| 726 | 4{92,204,26}  | CSC1=NC=C(N1C)C1=C(NCC2=CC=C(F)C=C2)N2C=CC(=CC2=N1)C(N)=O<br> c:4,9,18,22,24,27,t:2,13,15             | Z8854581172 | 1{92}  | NC(=O)c1c<br>cnc(N)c1              | 2{204} | CSc1ncc(C=<br>O)n1C                            | 3{26} | Fc1ccc(C[N+]<br>#[C-])cc1         | 44.8 | 40 |
| 727 | 4{113,373,14} | COCCNC1=C(N=C2N1C=CC=C2N1CCOCC1)<br>[C@@H]1[C@@H](C)C1(F)F<br> &1:20,21,r,c:7,11,13,t:5               | Z8855619505 | 1{113} | Nc1ncccc1<br>N2CCOCC2              | 2{373} | C[C@@H]1[<br>C@@H](C=<br>O)C1(F)F<br> &1:1,2,r | 3{14} | COCC[N+]<br>#[C-]                 | 39.9 | 40 |
| 728 | 4{28,374,7}   | C(C1CC1)N1C=C(N=N1)C1=C(NC2CCOCC2)<br>N2C=CC(=CC2=N1)C1=NOC=N1<br> c:6,8,11,22,24,27,33,t:30          | Z8878918456 | 1{28}  | Cl.Nc1cc(cc<br>n1)c2ncon2          | 2{374} | O=Cc1cn(CC<br>2CC2)nn1                         | 3{7}  | [C-]<br>#[N+]C1CC<br>OCC1         | 44.3 | 40 |
| 729 | 4{142,375,24} | COCC1=C(N=CO1)C1=C(NCC2=CC(OC)=C<br>C=C2)N2C=CC=C(OCCS(C)(=O)=O)C2=N1<br> c:5,9,17,19,23,35,t:3,13,25 | Z8873684680 | 1{142} | CS(=O)(=O)<br>)CCOc1ccc<br>nc1N    | 2{375} | COc1ocnc1<br>C=O                               | 3{24} | COc1cccc(C[<br>N+]<br>#[C-])c1    | 53.0 | 40 |
| 730 | 4{103,376,5}  | COCCNC1=C(N=C2C=NC=C(CO)N12)C1=<br>C(Br)SC(=N1)C1CC1  c:10,19,23,t:6,8,12                             | Z8873684652 | 1{103} | Nc1cnc(C<br>O)n1                   | 2{376} | Br1sc(nc1C<br>=O)C2CC2                         | 3{5}  | COCCC[N+]<br>#[C-]                | 47.7 | 40 |
| 731 | 4{369,340,31} | CCN1C=NC(=N1)C1=C(NCCSC)N2C=C(C=C<br>C2=N1)C(F)C(F)F  c:3,5,8,16,18,21                                | Z8873685474 | 1{369} | Cl.Nc1ccc(c<br>n1)C(F)C(F)<br>(F)F | 2{340} | CCn1cnc(C=<br>O)n1                             | 3{31} | CSCC[N+]<br>#[C-]                 | 43.6 | 40 |
| 732 | 4{50,295,18}  | CC1=NC(=CS1)C1=C(NC(C)(C)C)N2C(C=CC<br>=C2P(C)(C)=O)=N1  c:3,7,16,18,24,t:1                           | Z8846492023 | 1{50}  | CP(=O)(C)c<br>1cccc(N)n1           | 2{295} | Cc1nc(C=O)<br>cs1                              | 3{18} | CC(C)(C)[N<br>+]<br>#[C-]         | 39.1 | 40 |
| 733 | 4{379,377,7}  | CC1=CN=C1C1=C(NC2CCOCC2)N2C=CC<br>=C(Br)C2=N1  c:4,7,18,24,t:1,20                                     | Z8835022881 | 1{379} | Nc1ncccc1<br>Br                    | 2{377} | Cl.Cc1c[nH]<br>nc1C=O                          | 3{7}  | [C-]<br>#[N+]C1CC<br>OCC1         | 40.4 | 40 |
| 734 | 4{179,378,5}  | COCCNC1=C(N=C2C=C(OC)C=CN12)C1=<br>NC(=CC(Cl)=C1)C(=O)OC<br> c:14,21,24,t:6,8,10,19                   | Z8878918656 | 1{179} | COc1ccnc(<br>N)c1                  | 2{378} | COC(=O)c1c<br>c(Cl)cc(C=O)<br>n1               | 3{5}  | COCCC[N+]<br>#[C-]                | 43.4 | 40 |
| 735 | 4{81,116,13}  | COC1=CC=C(CNC2=C(N=C3C=NC=CN23)C<br>2=CN(CCC=C)N=N2)C=C1<br> c:12,14,26,29,t:2,4,8,10,19              | Z8878918775 | 1{81}  | Nc1cncn1                           | 2{116} | C=CCcn1cc(<br>C=O)nn1                          | 3{13} | COc1ccc(C[<br>N+]<br>#[C-])cc1    | 40.2 | 40 |

|     |               |                                                                                             |             |        |                                 |        |                                        |       |                                               |      |    |
|-----|---------------|---------------------------------------------------------------------------------------------|-------------|--------|---------------------------------|--------|----------------------------------------|-------|-----------------------------------------------|------|----|
| 736 | 4{48,379,22}  | CC1=C(Br)SC(=C1)C1=C(NC2COC2)N2C=C<br>C(=CC2=N1)S(C)(=O)=O  c:1,5,8,17,19,22                | Z8878918403 | 1{48}  | CS(=O)(=O)<br>c1ccnc(N)c<br>1   | 2{379} | Cc1cc(C=O)s<br>c1Br                    | 3{22} | [C-]<br>#[N+]C1CO<br>C1                       | 43.1 | 40 |
| 737 | 4{36,40,9}    | CNC1=C(N=C2C=CC(Br)=CN12)C1=NC(CO)<br>=CS1  c:6,9,18,t:2,4,14                               | Z8849597803 | 1{36}  | Nc1ccc(Br)<br>cn1               | 2{40}  | OCc1csc(C=<br>O)n1                     | 3{9}  | C[N+]#[C-]                                    | 36.1 | 39 |
| 738 | 4{375,334,43} | CC(C)OC1=CN=CC2=NC(=C(NC3CCN(CC3)<br>C(=O)OC(C)(C)C)N12)C1=C(C)OC=N1<br> c:6,30,34,t:4,8,10 | Z8873684703 | 1{375} | CC(C)Oe1c<br>ncc(N)n1           | 2{334} | Cc1ocnc1C=<br>O                        | 3{43} | CC(C)(C)OC<br>(=O)N1CCC(<br>CC1)[N+]#[<br>C-] | 48.4 | 39 |
| 739 | 4{81,257,13}  | COC1=CC=C(CNC2=C(N=C3C=NC=CN23)C<br>2CC(C2)NC(=O)OC(C)(C)C)C=C1<br> c:12,14,32,t:2,4,8,10   | Z8873684711 | 1{81}  | Nc1cncn1                        | 2{257} | CC(C)(C)OC<br>(=O)N1CCC(<br>C1)C=O     | 3{13} | COc1ccc(C[<br>N+]#[C-])cc1                    | 44.8 | 39 |
| 740 | 4{41,116,13}  | COC1=CC=C(CNC2=C(N=C3C=NC(C)=CN2<br>3)C2=CN(CCC=C)N=N2)C=C1<br> c:12,15,27,30,t:2,4,8,10,20 | Z8878918374 | 1{41}  | Cc1cnc(N)c<br>n1                | 2{116} | C=CCCn1cc(<br>C=O)nn1                  | 3{13} | COc1ccc(C[<br>N+]#[C-])cc1                    | 41.2 | 39 |
| 741 | 4{91,380,7}   | CC(C)(C)OC(=O)N1CCC(C)(CC2=C(NC3CC<br>OCC3)N3C=C(C=CC3=N2)C(N)=O)C1<br> c:13,24,26,29       | Z8878918828 | 1{91}  | NC(=O)c1c<br>cc(N)nc1           | 2{380} | CC(C)(C)OC<br>(=O)N1CCC(<br>C)(CC=O)C1 | 3{7}  | [C-]<br>#[N+]C1CC<br>OCC1                     | 47.7 | 39 |
| 742 | 4{142,326,21} | CN1N=CC=C1C1=C(NCC2CC2)N2C=CC=C(<br>OCCS(C)(=O)=O)C2=N1  c:2,4,7,16,28,t:18                 | Z8878918680 | 1{142} | CS(=O)(=O)<br>)CCOc1ccc<br>nc1N | 2{326} | Cn1ncce1C=<br>O                        | 3{21} | [C-]<br>#[N+]CC1C<br>C1                       | 40.5 | 39 |
| 743 | 4{146,139,10} | CC1=NN(CCO)C(C)=C1C1=C(NC2CCOC2)N<br>2C=C(C=CC2=N1)S(C)(=O)=O<br> c:8,11,21,23,26,t:1       | Z8878918388 | 1{146} | CS(=O)(=O)<br>c1ccc(N)nc<br>1   | 2{139} | Cc1m(CCO)<br>c(C)c1C=O                 | 3{10} | [C-]<br>#[N+]C1CC<br>OC1                      | 43.6 | 38 |
| 744 | 4{65,381,5}   | CCC1=CN=CC2=NC(=C(NCCCOC)N12)C1=<br>C2N(C)C=NC2=CC=C1<br> c:4,19,23,26,28,t:2,6,8           | Z8855619749 | 1{65}  | CCc1cnc(<br>N)n1                | 2{381} | Cn1cnc2cccc<br>(C=O)c12                | 3{5}  | COCCC[N+]<br>#[C-]                            | 37.8 | 38 |
| 745 | 4{199,382,34} | COC(C)(C)CC1=C(NCC2CCCO2)N2C=CC=C<br>(C2=N1)C(C)(F)F  c:6,17,19,22                          | Z8873685428 | 1{199} | CC(F)(F)c1<br>ccnc1N            | 2{382} | COC(C)(C)C<br>C=O                      | 3{34} | [C-]<br>#[N+]CC1C<br>CCO1                     | 38.0 | 38 |
| 746 | 4{181,62,14}  | COCCNC1=C(N=C2N1C=CC1=C2N=CC=N1)<br>C1CC1CCOCC1  c:7,11,13,16,18,t:5                        | Z8878918816 | 1{181} | Nc1nccc2nc<br>cnc12             | 2{62}  | O=CC1CC21<br>CCOCC2                    | 3{14} | COCC[N+]#[<br>C-]                             | 36.3 | 38 |
| 747 | 4{380,383,5}  | COCCNC1=C(N=C2N1C=C(Cl)N=C2C)C1=<br>NC=C(C)C=C1  c:8,15,24,t:6,12,19,21                     | Z8878918328 | 1{380} | Cc1nc(Cl)c<br>nc1N              | 2{383} | Cc1ccc(C=O<br>)nc1                     | 3{5}  | COCCC[N+]<br>#[C-]                            | 35.3 | 38 |

|     |               |                                                                                                                  |             |        |                                |        |                                                        |       |                                       |      |    |
|-----|---------------|------------------------------------------------------------------------------------------------------------------|-------------|--------|--------------------------------|--------|--------------------------------------------------------|-------|---------------------------------------|------|----|
| 748 | 4{218,384,10} | CN1N=C(C=C1C(F)F)C1=C(NC2CCOC2)N2<br>N=C(C=CC2=N1)C(C)(C)C  c:2,4,10,20,22,25                                    | Z8878918504 | 1{218} | CC(C)(C)c1<br>ccc(N)nn1        | 2{384} | Cn1nc(C=O)<br>cc1C(F)F                                 | 3{10} | [C-]<br>#[N+]C1CC<br>OC1              | 39.9 | 38 |
| 749 | 4{78,385,44}  | CC1=CN2N3C(NCCCCNC(=O)OC(C)(C)C)=<br>C(N=C3C=C(C)C2=N1)C1=CC(=CC=C1)[N+]<br>([O-])=O  c:18,20,27,32,34,t:1,23,30 | Z8855739078 | 1{78}  | Cc1cn2nc(N)<br>cc(C)c2n1       | 2{385} | [O-]<br>][N+](=O)c1<br>cccc(C=O)c1                     | 3{44} | CC(C)(C)OC<br>(=O)NCCCC<br>[N+]#[C-]  | 50.3 | 38 |
| 750 | 4{381,378,5}  | COCCCN1=C(N=C2C=NC=C(OCC(F)(F)F)<br>N12)C1=NC(=CC(Cl)=C1)C(=O)OC<br> c:10,25,28,t:6,8,12,23                      | Z8878918804 | 1{381} | Ne1cncc(O)<br>CC(F)(F)F<br>n1  | 2{378} | COC(=O)c1c<br>c(Cl)cc(C=O)<br>n1                       | 3{5}  | COCCCN1+<br>#[C-]                     | 48.2 | 38 |
| 751 | 4{185,386,23} | COC(=O)CCC(NC1=C(N=C2C=CC(=C(C)N1<br>2)S(C)(=O)=O)[C@H]1CC1(C)C)C(=O)OC<br> c:12,t:8,10,14                       | Z8878918777 | 1{185} | Cc1nc(N)cc<br>c1S(=O)(=O)<br>C | 2{386} | CC1(C)C[C<br>@@H]1C=O                                  | 3{23} | COC(=O)CC<br>C([N+]#[C-]<br>])C(=O)OC | 45.9 | 38 |
| 752 | 4{371,114,12} | COC(=O)[C@@H]1CC[C@@H](C1)C1=C(N<br>CC2CCOC2)N2C=CC=C(OCCCC#N)C2=N1<br> &1:4,7,r,c:10,21,32,t:23                 | Z8873684896 | 1{371} | Ne1ncccc1<br>OCCCC#N           | 2{114} | COC(=O)[C<br>@@H]1CC[<br>C@@H](C1)<br>C=O<br> &1:4,7,r | 3{12} | [C-]<br>#[N+]CC1C<br>COC1             | 43.1 | 37 |
| 753 | 4{50,387,14}  | CCN1N=C(C)C=C1C1=C(NCCOC)N2C(C=C<br>C=C2P(C)(C)=O)=N1  c:6,9,18,20,26,t:3                                        | Z8829498583 | 1{50}  | CP(=O)(C)c<br>1cccc(N)n1       | 2{387} | CCn1nc(C)cc<br>1C=O                                    | 3{14} | COCC[N+]#[<br>C-]                     | 37.6 | 37 |
| 754 | 4{382,233,62} | COC(=O)C1(CCCC1)NC1=C(CCCOCC=C)N=<br>C2C=NC(=CN12)C(F)(F)F  c:11,22,24,t:20                                      | Z8849597830 | 1{382} | Ne1enc(en1<br>)C(F)(F)F        | 2{233} | C=CCOCCC<br>C=O                                        | 3{62} | COC(=O)C1(<br>CCCC1)[N+]<br>#[C-]     | 42.6 | 37 |
| 755 | 4{187,16,10}  | CN1N=CC(CNC(=O)OC(C)(C)C)=C1C1=C(N<br>C2CCOC2)N2C=C(Cl)C(=CC2=N1)C#N<br> c:2,13,16,29,32,t:26                    | Z8873684856 | 1{187} | Ne1cc(C#N<br>)c(Cl)cn1         | 2{16}  | Cn1ncc(CNC<br>(=O)OC(C)(<br>C)C)c1C=O                  | 3{10} | [C-]<br>#[N+]C1CC<br>OC1              | 47.1 | 37 |
| 756 | 4{144,99,53}  | CNS(=O)(=O)C1=CN2C(NCCOCC3=CC=CC<br>=C3)=C(N=C2C=C1)C1=COC=N1<br> c:16,18,20,22,25,31,t:5,14,28                  | Z8873684634 | 1{144} | CNS(=O)(=O)<br>c1ccc(N)<br>nc1 | 2{99}  | O=Cc1coen1                                             | 3{53} | [C-]<br>#[N+]CCOC<br>c1cccc1          | 42.0 | 36 |
| 757 | 4{383,388,69} | COC1=NN(C)C=C1C1=C(NC2=C(OC)C=CC=<br>C2)N2N=C(C=CC2=N1)C1=NC=CC=C1<br> c:6,9,12,16,18,22,24,27,32,34,t:2,30      | Z8854581142 | 1{383} | Ne1ccc(nn1<br>)c2cccn2         | 2{388} | COc1nn(C)c<br>c1C=O                                    | 3{69} | COc1cccc1[<br>N+]#[C-]                | 42.0 | 36 |
| 758 | 4{119,236,61} | CC(C)(C)OC(=O)NCCCN1=C(CCC2OCCO2<br>)N=C2C=CC(=CN12)C#N  c:12,24,26,t:22                                         | Z8878918645 | 1{119} | Ne1ccc(C#<br>N)en1             | 2{236} | O=CCCC1O<br>CCO1                                       | 3{61} | CC(C)(C)OC<br>(=O)NCCC[<br>N+]#[C-]   | 40.7 | 36 |

|     |               |                                                                                           |             |        |                          |        |                       |       |                        |      |    |
|-----|---------------|-------------------------------------------------------------------------------------------|-------------|--------|--------------------------|--------|-----------------------|-------|------------------------|------|----|
| 759 | 4{384,104,10} | CCOC1=C(C)N2C(NC3CCOC3)=C(N=C2C=C1)C1=NC(C)=CO1  c:3,14,16,19,25,t:22                     | Z8873684881 | 1{384} | CCOe1ccc(N)nc1C          | 2{104} | Cc1coc(C=O)n1         | 3{10} | [C-]#[N+]C1CCOC1       | 33.6 | 36 |
| 760 | 4{48,389,22}  | CS(=O)(=O)C1=CC2=NC(=C(NC3COC3)N2C=C1)C1=C(F)C(CI)=C(F)C=C1  c:18,21,28,t:4,6,8,25        | Z8873684750 | 1{48}  | CS(=O)(=O)c1ccnc(N)c1    | 2{389} | Fc1ccc(C=O)c(F)c1Cl   | 3{22} | [C-]#[N+]C1COCl        | 40.6 | 36 |
| 761 | 4{385,282,67} | CCC(C)NC1=C(N=C2C=C(C#N)C3=C(C=CC=C3)N12)C1CC2(C1)OCCO2  c:15,17,t:5,7,9,13               | Z8878918363 | 1{385} | Nc1cc(C#N)c2ccccc2n1     | 2{282} | O=CC1CC2(C1)OCCO2     | 3{67} | CCC(C)[N+]#[C-]        | 36.9 | 36 |
| 762 | 4{92,125,26}  | COC1=NC=NC(=C1)C1=C(NCC2=CC=C(F)C=C2)N2C=CC(=CC2=N1)C(N)=O  c:4,6,9,18,22,24,27,t:2,13,15 | Z8878918302 | 1{92}  | NC(=O)c1cnc(N)c1         | 2{125} | COc1cc(C=O)ncn1       | 3{26} | Fc1ccc(C[N+]#[C-])cc1  | 38.1 | 36 |
| 763 | 4{46,40,13}   | COC1=CC=C(CNC2=C(N=C3C=CC=CN23)C2=NC(CO)=CS2)C=C1  c:12,14,23,27,t:2,4,8,10,19            | Z8873685476 | 1{46}  | Nc1ccccn1                | 2{40}  | OCc1csc(C=O)n1        | 3{13} | COc1ccc(C[N+]#[C-])cc1 | 35.4 | 36 |
| 764 | 4{99,286,34}  | NS(=O)(=O)C1=CN2C(C=C1)=NC(=C2NCC1CCCO1)C1=NC=CC(=C1)C(F)(F)F  c:8,10,12,25,27,t:4,23     | Z8878918636 | 1{99}  | Nc1ccc(en1)S(=O)(=O)N    | 2{286} | FC(F)(F)c1ccnc(C=O)c1 | 3{34} | [C-]#[N+]CC1COCO1      | 42.7 | 36 |
| 765 | 4{386,390,5}  | COCCCN1=C(N=C2C=C(C)C=CN12)C1CC2C(C1)C2(F)F  c:13,t:6,8,10                                | Z8878918859 | 1{386} | Cc1ccnc(N)c1             | 2{390} | FC1(F)C2CC(C21)C=O    | 3{5}  | COCC[N+]#[C-]          | 32.4 | 36 |
| 766 | 4{109,391,29} | CCOC(=O)CCNC1=C(CCC(C)(C)C(=O)OCC)N=C2C=CC=C(N12)S(N)(=O)=O  c:8,22,24,t:20               | Z8878918665 | 1{109} | Cl.Nc1cccc(n1)S(=O)(=O)N | 2{391} | CCOC(=O)C(C)(C)CCC=O  | 3{29} | CCOC(=O)C[N+]#[C-]     | 43.9 | 36 |
| 767 | 4{193,328,10} | CCC1=NNC=C1C1=C(NC2CCOC2)N2C=C(C=CC2=N1)C(=O)NC  c:5,8,18,20,23,t:2                       | Z8873684878 | 1{193} | CNC(=O)c1ccc(N)nc1       | 2{328} | Cl.CCc1n[nH]cc1C=O    | 3{10} | [C-]#[N+]C1CCOC1       | 34.2 | 36 |
| 768 | 4{371,365,12} | N#CCCCOC1=CC=CN2C(NCC3CCOC3)=C(N=C12)C1=NNC2=C1C=NC=C2  c:8,19,28,31,33,t:6,21,25         | Z8837933140 | 1{371} | Nc1ncccc1OCCCC#N         | 2{365} | O=Cc1n[nH]c2ccccc12   | 3{12} | [C-]#[N+]CC1COC1       | 40.0 | 35 |
| 769 | 4{387,375,46} | COCC1=C(N=CO1)C1=C(NCC(C)=C)N2C=C(C=C(OC(F)F)C2=N1)  c:5,9,17,26,t:3,19                   | Z8873684838 | 1{387} | Nc1ncccc1OC(F)F          | 2{375} | COc1ocnc1C=O          | 3{46} | CC(=C)C[N+]#[C-]       | 34.9 | 35 |
| 770 | 4{146,392,46} | CC(=C)CNC1=C(N=C2C=CC(=CN12)S(C)(=O)=O)C1CCOCC1  c:9,11,t:5,7                             | Z8878918503 | 1{146} | CS(=O)(=O)c1ccc(N)nc1    | 2{392} | O=CC1CCOCC1           | 3{46} | CC(=C)C[N+]#[C-]       | 32.9 | 35 |

|     |               |                                                                                                         |             |        |                          |        |                                     |       |                             |      |    |
|-----|---------------|---------------------------------------------------------------------------------------------------------|-------------|--------|--------------------------|--------|-------------------------------------|-------|-----------------------------|------|----|
| 771 | 4{32,393,18}  | CC(C)(C)NC1=C(N=C2C=C(C=CN12)P(C)(C)=O)C1=CC(Br)=C(F)C=C1<br> c:9,11,26,t:5,7,20,23                     | Z8878918310 | 1{32}  | CP(=O)(C)c1ccnc(N)c1     | 2{393} | Fc1ccc(C=O)cc1Br                    | 3{18} | CC(C)(C)[N+][C-]            | 40.8 | 34 |
| 772 | 4{327,90,65}  | COC(=O)C1=C(F)C2=NC(=C(NC3CCCC3)N2C=C1)C1=COC(C)=N1<br> c:4,20,27,t:7,9,23                              | Z8855739109 | 1{327} | COC(=O)c1ccnc(N)c1F      | 2{90}  | Cc1nc(C=O)col                       | 3{65} | [C-][N+][C1CC1]CC1          | 33.0 | 34 |
| 773 | 4{380,312,5}  | COCCNC1=C(N=C2N1C=C(Cl)N=C2C)C1COC1(C)C<br> c:8,15,t:6,12                                               | Z8873685390 | 1{380} | Cc1nc(Cl)cnc1N           | 2{312} | CC1(C)OCC1C=O                       | 3{5}  | COCC[N+][C-]                | 32.4 | 34 |
| 774 | 4{142,394,24} | COC1=CC(CNC2=C(N=C3N2C=CC=C3OCCS(C)(=O)=O)C2=NOC=C2C)=CC=C1<br> c:9,13,15,28,31,33,t:2,7,25             | Z8878918913 | 1{142} | CS(=O)(=O)CCOc1ccnc1N    | 2{394} | Cc1conc1C=O                         | 3{24} | COc1cccc(C[N+][C-])c1       | 41.8 | 34 |
| 775 | 4{348,258,44} | CC(C)(C)OC(=O)NCCCCNC1=C(N=C2C=NC(F)=CN12)C1=NN=C(S1)C1CC1<br> c:17,20,27,t:13,15,25                    | Z8873684733 | 1{348} | Nc1nc(F)cnc1             | 2{258} | O=Cc1nnc(s1)C2CC2                   | 3{44} | CC(C)(C)OC(=O)NCCCC[N+][C-] | 40.9 | 34 |
| 776 | 4{146,395,10} | CC(C)(C)OC(=O)N[C@H]1C[C@@H](C1)C1=C(NC2CCOC2)N2C=C(C=CC2=N1)S(C)(=O)=O<br> r,c:13,23,25,28             | Z8873684865 | 1{146} | CS(=O)(=O)c1ccc(N)nc1    | 2{395} | CC(C)(C)OC(=O)N[C@H]1C[C@@H](C1)C=O | 3{10} | [C-][N+][C1CC1]OC1          | 41.1 | 34 |
| 777 | 4{41,396,13}  | COC1=CC=C(CNC2=C(N=C3C=NC(C)=CN23)C2=CN=C3COCCN23)C=C1<br> c:12,15,31,t:2,4,8,10,20,22                  | Z8873684595 | 1{41}  | Cc1nc(N)cnc1             | 2{396} | O=Cc1enc2COCc1n2                    | 3{13} | COc1ccc(C[N+][C-])cc1       | 35.6 | 34 |
| 778 | 4{356,397,1}  | COC1=C(C2=C(NC3CC3)N3C(C=CC(Cl)=C3C(=O)N(C)C)=N2)C(C)=CC(C)=N1<br> c:2,4,13,16,23,27,30                 | Z8846492036 | 1{356} | CN(C)C(=O)c1nc(N)ccc1Cl  | 2{397} | COc1nc(C)cc(C)c1C=O                 | 3{1}  | [C-][N+][C1CC1]             | 37.4 | 33 |
| 779 | 4{181,358,14} | COCCNC1=C(N=C2N1C=CC1=C2N=CC=N1)C1CC1CCN(C1)C(=O)OC(C)(C)C<br> c:7,11,13,16,18,t:5                      | Z8878918434 | 1{181} | Nc1nccc2nccnc12          | 2{358} | CC(C)(C)OC(=O)N1CCC2(CC2C=O)C1      | 3{14} | COCC[N+][C-]                | 39.6 | 33 |
| 780 | 4{286,383,23} | COC(=O)CCC(NC1=C(N=C2C=CC(=CN12)C1=NC=CC=C1)C1=NC=C(C)C=C1)C(=O)OC<br> c:12,14,21,23,31,t:8,10,19,26,28 | Z8855739252 | 1{286} | Cl.Cl.Nc1ccc(en1)c2cccn2 | 2{383} | Cc1ccc(C=O)nc1                      | 3{23} | COC(=O)CC(C[N+][C-])C(=O)OC | 41.5 | 33 |
| 781 | 4{214,32,10}  | COC1=CC(Br)=C(C)N2C(NC3CCOC3)=C(N=C12)[C@@H]1C[C@H]1C1=CC=NN1C<br> &1:19,21,r,c:16,28,t:2,5,18,26       | Z8873684886 | 1{214} | COc1cc(Br)c(C)nc1N       | 2{32}  | Cn1nccc1[C@@H]2C[C@H]2C=O &1:6,8,r  | 3{10} | [C-][N+][C1CC1]OC1          | 40.3 | 33 |



|     |               |                                                                                                                 |             |        |                                   |        |                                          |       |                                       |      |    |
|-----|---------------|-----------------------------------------------------------------------------------------------------------------|-------------|--------|-----------------------------------|--------|------------------------------------------|-------|---------------------------------------|------|----|
| 782 | 4{81,19,9}    | CNC1=C(N=C2C=NC=CN12)C1=C(OC)C=N<br>N1C  c:6,8,13,17,t:2,4                                                      | Z8855619682 | 1{81}  | Ne1cncn1                          | 2{19}  | COc1enn(C)<br>c1C=O                      | 3{9}  | C[N+]#[C-]                            | 23.3 | 33 |
| 783 | 4{78,398,28}  | CCCNC1=C(N=C2C=C(C)C3=NC(C)=CN3N1<br>2)C1=CC2=C(CCCC2)O1<br> c:14,t:4,6,8,11,21,23                              | Z8878918628 | 1{78}  | Cc1cn2nc(N)<br>cc(C)c2n1          | 2{398} | O=Cc1cc2C<br>CCCc2o1                     | 3{28} | CCC[N+]#[C-]<br>]                     | 32.7 | 33 |
| 784 | 4{286,235,23} | COC(=O)CCC(NC1=C(N=C2C=CC(=CN12)C<br>1=NC=CC=C1)C1=CSC(=C1)C#N)C(=O)OC<br> c:12,14,21,23,29,t:8,10,19,26        | Z8808559878 | 1{286} | Cl.Cl.Nc1cc<br>c(en1)c2ccc<br>cn2 | 2{235} | O=Cc1csc(C<br>#N)c1                      | 3{23} | COC(=O)CC<br>C([N+]#[C-]<br>])C(=O)OC | 42.3 | 33 |
| 785 | 4{361,399,12} | CC(C)OC1=CC=CN2C(NCC3CCOC3)=C(N=<br>C12)C1=CN(N=C1C)C1CC1<br> c:6,17,26,t:4,19,23                               | Z8878918330 | 1{361} | Cl.CC(C)Oc<br>1ccnc1N             | 2{399} | Cc1nn(cc1C<br>=O)C2CC2                   | 3{12} | [C-]<br>#[N+]CC1C<br>COC1             | 35.0 | 33 |
| 786 | 4{118,400,35} | CSCCCNC1=C(N=C2C=CC=C(C(C)O)N12)C<br>1=CN(N=N1)C1CCCC1  c:10,23,t:6,8,12,20                                     | Z8873684919 | 1{118} | Cl.CC(O)c1<br>cccc(N)n1           | 2{400} | O=Cc1cn(nn<br>1)C2CCCC2                  | 3{35} | CSCCC[N+]<br>#[C-]                    | 35.3 | 33 |
| 787 | 4{111,206,22} | COC(=O)C1=CN2C(NC3COC3)=C(C[C@H](<br>C)NC(=O)OC(C)(C)C)N=C2C(C)=C1<br> c:26,30,t:4,13                           | Z8873684805 | 1{111} | COC(=O)c1<br>cnc(N)c(C)c<br>1     | 2{206} | C[C@@H](<br>CC=O)NC(=<br>O)OC(C)(C)<br>C | 3{22} | [C-]<br>#[N+]C1CO<br>C1               | 36.7 | 33 |
| 788 | 4{79,106,13}  | COC1=CC=C(CNC2=C(N=C3C=NC=C(C)N2<br>3)C2=C(OC)N=CC=N2)C=C1<br> c:12,20,24,26,29,t:2,4,8,10,14                   | Z8835022911 | 1{79}  | Cc1cncc(N)<br>n1                  | 2{106} | COc1cnccn1<br>C=O                        | 3{13} | COc1ccc(C[<br>N+]#[C-])cc1            | 32.8 | 32 |
| 789 | 4{187,401,12} | CN1N=C(Br)C(=N1)C1=C(NCC2CCOC2)N2C<br>=C(Cl)C(=CC2=N1)C#N  c:5,8,22,25,t:2,19                                   | Z8873684795 | 1{187} | Ne1cc(C#N)<br>c(Cl)cn1            | 2{401} | Cn1nc(Br)c(<br>C=O)n1                    | 3{12} | [C-]<br>#[N+]CC1C<br>COC1             | 37.8 | 32 |
| 790 | 4{350,56,23}  | COC(=O)CCC(NC1=C(N=C2C=NC(=CN12)C<br>1=CC=CC=C1)C1=C(C)C=NC(F)=C1)C(=O)O<br>C  c:12,14,21,23,26,29,32,t:8,10,19 | Z8849597821 | 1{350} | Ne1cnc(en1)<br>c2cccc2            | 2{56}  | Cc1cnc(F)cc<br>1C=O                      | 3{23} | COC(=O)CC<br>C([N+]#[C-]<br>])C(=O)OC | 40.7 | 32 |
| 791 | 4{73,402,13}  | COC1=CC=C(CNC2=C(N=C3C=CC4=NC=C<br>N4N23)C2=C(F)C(C)=CC=C2)C=C1<br> c:12,16,23,27,29,32,t:2,4,8,10,14           | Z8878918874 | 1{73}  | Ne1ccc2ncc<br>n2n1                | 2{402} | Cc1cccc(C=<br>O)c1F                      | 3{13} | COc1ccc(C[<br>N+]#[C-])cc1            | 33.9 | 31 |
| 792 | 4{127,403,29} | CCOC(=O)CCNC1=C(N=C2N1C=CC=C2F)C<br>1=CN=C(Cl)N1  c:10,14,16,t:8,20,22                                          | Z8873684670 | 1{127} | Ne1ncccc1F                        | 2{403} | Clc1ncc(C=<br>O)[nH]1                    | 3{29} | CCOC(=O)C<br>C[N+]#[C-]               | 29.6 | 31 |
| 793 | 4{388,404,67} | CCC(C)NC1=C(N=C2C=C3CCCOC3=CN12)<br>C1=NN=C(C)N1  c:16,t:5,7,9,21,23                                            | Z8873685425 | 1{388} | Cl.Nc1cc2C<br>CCOc2cn1            | 2{404} | Cc1nnc(C=O)<br>[nH]1                     | 3{67} | CCC(C)[N+]<br>#[C-]                   | 27.2 | 31 |

|     |               |                                                                                                   |             |        |                             |        |                              |       |                               |      |    |
|-----|---------------|---------------------------------------------------------------------------------------------------|-------------|--------|-----------------------------|--------|------------------------------|-------|-------------------------------|------|----|
| 794 | 4{81,157,9}   | CNC1=C(N=C2C=NC=CN12)C1=NC2=C(C=C1)N=CC=C2  c:6,8,15,17,20,22,t:2,4,13                            | Z8835022913 | 1{81}  | Nc1cncn1                    | 2{157} | O=Cc1ccc2ncccc2n1            | 3{9}  | C[N+]#[C-]                    | 22.9 | 31 |
| 795 | 4{81,396,13}  | COC1=CC=C(CNC2=C(N=C3C=NC=CN23)C2=CN=C3COCCN23)C=C1  c:12,14,30,t:2,4,8,10,19,21                  | Z8878918856 | 1{81}  | Nc1cncn1                    | 2{396} | O=Cc1cnc2C OCCn12            | 3{13} | COc1ccc(C[N+]#[C-])cc1        | 30.9 | 30 |
| 796 | 4{187,405,12} | CC(F)(F)C1=NC=C(S1)C1=C(NCC2CCOC2)N2C=C(Cl)C(=CC2=N1)C#N  c:6,10,24,27,t:4,21                     | Z8878918560 | 1{187} | Nc1cc(C#N)c(Cl)cn1          | 2{405} | CC(F)(F)c1ncc(C=O)s1         | 3{12} | [C-]#[N+]CC1C COC1            | 34.6 | 30 |
| 797 | 4{186,406,8}  | COC(=O)C(CC1=CC=CC=C1)NC1=C(N=C2C=C(C=CN12)S(=O)(=O)N(C)C)C1=CC=NS1  c:8,10,18,20,33,t:6,14,16,31 | Z8873684677 | 1{186} | Cl.CN(C)S(=O)(=O)c1cnc(N)c1 | 2{406} | O=Cc1ccns1                   | 3{8}  | COC(=O)C(Cc1cccc1)[N+]#[C-]   | 39.2 | 30 |
| 798 | 4{68,371,23}  | COC(=O)CCC(NC1=C(N=C2C=C(C=CN12)C#C)C1=C(C)C(OC)=CC=N1)C(=O)OC  c:12,14,21,26,28,t:8,10           | Z8878918811 | 1{68}  | Nc1cc(C#C)ccn1              | 2{371} | COc1cnc(C=O)c1C              | 3{23} | COC(=O)CC C([N+]#[C-])C(=O)OC | 35.2 | 30 |
| 799 | 4{348,407,2}  | CCC1=NN=C(N1)C1=C(NC2=CC=C(F)C=C2)N2C=C(F)N=CC2=N1  c:4,8,16,23,26,t:2,11,13,20                   | Z8873684930 | 1{348} | Nc1cnc(F)cn1                | 2{407} | CCc1nnc(C=O)[nH]1            | 3{2}  | Fc1ccc([N+]#[C-])cc1          | 27.3 | 30 |
| 800 | 4{96,408,60}  | COCCN(C)CC1=CC2=NC(CCN3CCOC3=O)=C(NC3=CC(=CC=C3)C(=O)OC)N2C=C1  c:25,27,36,t:7,9,20,23            | Z8849597825 | 1{96}  | COCCN(C)Cc1cnc(N)c1         | 2{408} | O=CCCN1C COC1=O              | 3{60} | COC(=O)c1cccc([N+]#[C-])c1    | 38.4 | 30 |
| 801 | 4{359,409,22} | CC(C)(C)OC(=O)NC1=NC=C(N=C1)C1=C(NC2COC2)N2C=C(OC(F)F)C=CC2=N1  c:10,12,15,30,33,t:8,24           | Z8854581143 | 1{359} | Nc1ccc(OC(F)F)cn1           | 2{409} | CC(C)(C)OC(=O)Nc1cnc(C=O)cn1 | 3{22} | [C-]#[N+]C1CO C1              | 35.7 | 29 |
| 802 | 4{61,320,23}  | CCC1=CC=CC2=NC(=C(NC(CCC(=O)OC)C(=O)OC)N12)C1=NN(C)C=N1  c:4,29,t:2,6,8,25                        | Z8873685304 | 1{61}  | CCc1cccc(N)n1               | 2{320} | Cn1cnc(C=O)n1                | 3{23} | COC(=O)CC C([N+]#[C-])C(=O)OC | 31.7 | 29 |
| 803 | 4{188,410,67} | CCC(C)NC1=C(N=C2C=NC=C(N12)C(=O)OC)C1=CSC(=N1)C1=NC=CC=N1  c:9,11,23,28,30,t:5,7,20,26            | Z8873685325 | 1{188} | COC(=O)c1cnc(N)n1           | 2{410} | O=Cc1esc(n1)c2nccn2          | 3{67} | CCC(C)[N+]#[C-]               | 32.4 | 29 |
| 804 | 4{70,92,31}   | CSCCN1=C(N=C2N1C=CN=C2C1CC1)C1=CC(C)=NO1  c:7,11,13,23,t:5,20                                     | Z8873684624 | 1{70}  | Nc1cncn1 C2CC2              | 2{92}  | Cc1cc(C=O)on1                | 3{31} | CSCC[N+]#[C-]                 | 26.0 | 29 |
| 805 | 4{128,320,29} | CCOC(=O)CCNC1=C(N=C2C=CC(=CN12)N(C)CCOC)C1=NN(C)C=N1  c:12,14,29,t:8,10,25                        | Z8878918844 | 1{128} | COCCN(C)c1ccc(N)nc1         | 2{320} | Cn1cnc(C=O)n1                | 3{29} | CCOC(=O)C C[N+]#[C-]          | 31.5 | 29 |
| 806 | 4{83,411,7}   | CP(C)(=O)C1=CN2C(C=C1)=NC(=C2NC1CC OCC1)C1=CC2=C(CCC2)N=C1  c:8,10,12,31,t:4,23,25                | Z8835022873 | 1{83}  | CP(=O)(C)c1ccc(N)nc1        | 2{411} | O=Cc1cnc2C CCc2c1            | 3{7}  | [C-]#[N+]C1CC OCC1            | 31.6 | 29 |

|     |               |                                                                                                                   |             |        |                                  |        |                                 |       |                                     |      |    |
|-----|---------------|-------------------------------------------------------------------------------------------------------------------|-------------|--------|----------------------------------|--------|---------------------------------|-------|-------------------------------------|------|----|
| 807 | 4{239,223,37} | COC(=O)C1CC(C1)NC1=C(N=C2C=CC(=CN12)N1CCCC1)C1=CN=C(C=C1)C(=O)OC<br> c:14,16,29,31,t:10,12,27                     | Z8855619681 | 1{239} | Cl.Cl.Nc1cc<br>c(en1)N2C<br>CCC2 | 2{223} | Cl.COC(=O)<br>c1ccc(C=O)c<br>n1 | 3{37} | COC(=O)C1<br>CC(C1)[N+]<br>#[C-]    | 34.6 | 28 |
| 808 | 4{83,412,31}  | CSCCNC1=C(N=C2C=CC(=CN12)P(C)(C)=O)<br>C1=CC(SC)=CC=C1  c:9,11,24,26,t:5,7,20                                     | Z8878918765 | 1{83}  | CP(=O)(C)c<br>1ccc(N)nc1         | 2{412} | CSclcccc(C=<br>O)c1             | 3{31} | CSCC[N+]#[<br>C-]                   | 30.7 | 28 |
| 809 | 4{311,413,12} | FC1=CC2=NC(C3=CN=C(S3)C3=CC=NC=C3<br>)=C(NCC3CCOC3)N2C=C1<br> c:8,14,16,30,t:1,3,6,12,18                          | Z8849597805 | 1{311} | Nc1cc(F)cc<br>n1                 | 2{413} | O=Cc1cnc(s1<br>c2ccncc2         | 3{12} | [C-<br>]#[N+]CC1C<br>COC1           | 29.9 | 28 |
| 810 | 4{32,5,31}    | CSCCNC1=C(N=C2C=C(C=CN12)P(C)(C)=O)<br>C1=C(C)C=NC=C1C  c:9,11,20,23,25,t:5,7                                     | Z8878918836 | 1{32}  | CP(=O)(C)c<br>1ccnc(N)c1         | 2{5}   | Cc1cnc(C)c<br>1C=O              | 3{31} | CSCC[N+]#[<br>C-]                   | 29.2 | 28 |
| 811 | 4{154,414,49} | CCC1=C(N=CC=C1)C1=C(NC2CC(F)(F)C2)N<br>2C=CC(=CC2=N1)[N+](=[O-])=O<br> c:4,6,9,20,22,25,t:2                       | Z8873685281 | 1{154} | Nc1cc(ccn1<br>)[N+](=O)[<br>O-]  | 2{414} | CCc1ccnc1<br>C=O                | 3{49} | FC1(F)CC(C<br>1)[N+]#[C-]           | 27.8 | 28 |
| 812 | 4{348,415,67} | CCC(C)NC1=C(N=C2C=NC(F)=CN12)C1=N<br>C=NN1CC  c:9,12,19,t:5,7,17                                                  | Z8873685461 | 1{348} | Nc1cnc(F)c<br>n1                 | 2{415} | CCn1ncn1C<br>=O                 | 3{67} | CCC(C)[N+]<br>#[C-]                 | 22.5 | 27 |
| 813 | 4{28,416,7}   | COCC1=CC(F)=C(C2=C(NC3CCOCC3)N3C=<br>CC(=CC3=N2)C2=NOC=N2)C(F)=C1<br> c:8,19,21,24,30,34,t:3,6,27                 | Z8873685350 | 1{28}  | Cl.Nc1cc(cc<br>n1)c2ncon2        | 2{416} | COCc1cc(F)<br>c(C=O)c(F)c<br>1  | 3{7}  | [C-<br>]#[N+]C1CC<br>OCC1           | 32.7 | 27 |
| 814 | 4{103,293,40} | CCOC(=O)C1=CC=C(NC2=C(N=C3C=NC=C(<br>CO)N23)C2=C(F)N(C)N=C2)C=C1<br> c:14,23,28,31,t:5,7,10,12,16                 | Z8878918658 | 1{103} | Nc1cnc(C<br>O)n1                 | 2{293} | Cn1ncc(C=O<br>c1F               | 3{40} | CCOC(=O)c<br>1ccc([N+]#[<br>C-])cc1 | 30.4 | 27 |
| 815 | 4{85,417,31}  | CSCCNC1=C(N=C2C=C(C=C(C)N12)C#N)C1<br>=C2N=NN(C)C2=CC=C1<br> c:9,19,21,26,28,t:5,7,11                             | Z8873684768 | 1{85}  | Cc1cc(C#N)<br>cc(N)n1            | 2{417} | Cn1nnc2c(C<br>=O)cccc12         | 3{31} | CSCC[N+]#[<br>C-]                   | 27.4 | 27 |
| 816 | 4{50,418,15}  | CCNC1=C(N=C2C=CC=C(N12)P(C)(C)=O)C<br>1=NC2=C(C=CC=C2C1)C=C1<br> c:7,9,22,24,28,t:3,5,18,20                       | Z8846492148 | 1{50}  | CP(=O)(C)c<br>1cccc(N)n1         | 2{418} | Clc1cccc2ccc<br>(C=O)nc12       | 3{15} | CC[N+]#[C-]                         | 28.9 | 27 |
| 817 | 4{72,375,24}  | COCC1=C(N=CO1)C1=C(NCC2=CC(OC)=C<br>C=C2)N2C=C(Br)N=C(OC)C2=N1<br> c:5,9,17,19,31,t:3,13,23,26                    | Z8855619691 | 1{72}  | COc1nc(Br)<br>cnc1N              | 2{375} | COCc1ocn1<br>C=O                | 3{24} | COc1cccc(C<br>N+)#[C-]c1            | 34.0 | 27 |
| 818 | 4{185,419,8}  | COC(=O)C(CC1=CC=CC=C1)NC1=C(N=C2C<br>=CC(=C(C)N12)S(C)(=O)=O)C1=NC=CC(OC<br>)=C1  c:8,10,18,32,36,t:6,14,16,20,30 | Z8878918452 | 1{185} | Cc1nc(N)cc<br>c1S(=O)(=O<br>)C   | 2{419} | COc1cnc(C<br>=O)c1              | 3{8}  | COC(=O)C(<br>Cc1cccc1)[<br>N+]#[C-] | 35.4 | 27 |
| 819 | 4{81,420,9}   | CNC1=C(CC(C)(C)C#N)N=C2C=NC=CN12<br> c:2,12,14,t:10                                                               | Z8878918348 | 1{81}  | Nc1cncn1                         | 2{420} | CC(C)(CC=<br>O)C#N              | 3{9}  | C[N+]#[C-]                          | 16.1 | 26 |

|     |               |                                                                                               |             |        |                                 |        |                                 |       |                           |      |    |
|-----|---------------|-----------------------------------------------------------------------------------------------|-------------|--------|---------------------------------|--------|---------------------------------|-------|---------------------------|------|----|
| 820 | 4{41,421,9}   | CNC1=C(N=C2C=NC(C)=CN12)C1=CN=C(S1)C1=CC=CO1  c:6,9,16,22,t:2,4,14,20                         | Z8873685445 | 1{41}  | Cc1cnc(N)c<br>n1                | 2{421} | O=Cc1cnc(s1)<br>c2cccc2         | 3{9}  | C[N+]#[C-]                | 21.8 | 26 |
| 821 | 4{176,377,14} | COCCNC1=C(N=C2N1C=CN=C2N1CCCC1)C1=NNC=C1C  c:7,11,13,25,t:5,22                                | Z8878918326 | 1{176} | Nc1cncnc1<br>N2CCCC2            | 2{377} | Cl.Cc1c[nH]<br>nc1C=O           | 3{14} | COCC[N+]#[C-]             | 23.8 | 26 |
| 822 | 4{85,422,35}  | CSCCCNC1=C(N=C2C=C(C=C(C)N12)C#N)C1CC1CCOC1  c:10,t:6,8,12                                    | Z8855739119 | 1{85}  | Cc1cc(C#N)<br>cc(N)n1           | 2{422} | O=CC1CC21<br>CCOC2              | 3{35} | CSCCC[N+]#[C-]            | 24.8 | 26 |
| 823 | 4{28,92,18}   | CC1=NOC(=C1)C1=C(NC(C)(C)C)N2C=CC(=CC2=N1)C1=NOC=N1  c:4,7,15,17,20,26,t:1,23                 | Z8878918344 | 1{28}  | Cl.Nc1cc(cc<br>n1)c2ncon2       | 2{92}  | Cc1cc(C=O)<br>on1               | 3{18} | CC(C)(C)[N+]#[C-]         | 23.2 | 25 |
| 824 | 4{362,423,10} | CNC(=O)C1=CC=CC2=NC(=C(NC3CCOC3)N12)C1=CC2=C(C=CN2C)C=C1  c:6,26,31,t:4,8,10,22,24            | Z8855619560 | 1{362} | CNC(=O)c1<br>cccc(N)n1          | 2{423} | Cn1ccc2ccc(<br>C=O)cc12         | 3{10} | [C-]<br>]#[N+]C1CC<br>OC1 | 26.6 | 25 |
| 825 | 4{356,353,1}  | CN(C)C(=O)C1=C(CI)C=CC2=NC(=C(NC3C3)N12)C1=C(CF)C=CC=C1  c:5,8,22,26,28,t:10,12               | Z8846492014 | 1{356} | CN(C)C(=O)<br>c1nc(N)ccc<br>1Cl | 2{353} | FCc1cccc1<br>C=O                | 3{1}  | [C-]<br>]#[N+]C1CC<br>1   | 26.1 | 25 |
| 826 | 4{389,424,5}  | COCCNC1=C(N=C2N1C=C(C)C=C2)C1=NN(C)C(=N1)C(F)(F)F  c:8,15,23,t:6,12,19                        | Z8873684934 | 1{389} | Cc1cnc(N)c<br>(C)c1             | 2{424} | Cn1nc(C=O)<br>nc1C(F)(F)F       | 3{5}  | COCC[N+]#[C-]             | 25.8 | 25 |
| 827 | 4{141,209,35} | CSCCCNC1=C(N=C2C=C(NC(C)=O)C=CN12)C1=NN=C2CCCCN12  c:16,t:6,8,10,21,23                        | Z8878918331 | 1{141} | CC(=O)Nc1<br>ccnc(N)c1          | 2{209} | O=Cc1nnc2C<br>CCCN12            | 3{35} | CSCCC[N+]#[C-]            | 26.8 | 25 |
| 828 | 4{390,191,31} | CCN1C=NN=C1C1=C(NCCSC)N2C(C=CC(C)C)=C2Cl=N1  c:3,5,8,17,21,24                                 | Z8878918633 | 1{390} | CCc1ccc(N)<br>nc1Cl             | 2{191} | CCn1enne1C<br>=O                | 3{31} | CSCC[N+]#[C-]             | 24.2 | 25 |
| 829 | 4{391,425,49} | CS(=O)(=O)N1CCCC(C1)C1=C(NC2CC(F)(F)C2)N2N=C(C=CC2=N1)C1=C(F)C=CC=C1  c:11,22,24,27,30,33,35  | Z8873684675 | 1{391} | Nc1ccc(nn1)<br>c2cccc2F         | 2{425} | CS(=O)(=O)<br>N1CCCC(C1)<br>C=O | 3{49} | FC1(F)CC(C1)[N+]#[C-]     | 31.5 | 24 |
| 830 | 4{392,258,67} | CCC(C)NC1=C(N=C2C=CC3=C(NC(C)=N3)N12)C1=NN=C(S1)C1CC1  c:9,15,23,t:5,7,11,21                  | Z8878918394 | 1{392} | Cl.Cc1nc2c<br>cc(N)nc2[n<br>H]1 | 2{258} | O=Cc1nnc(s1)<br>C2CC2           | 3{67} | CCC(C)[N+]#[C-]           | 24.1 | 24 |
| 831 | 4{123,426,22} | CCOC(=O)COC1=CC=C(C=C1)C1=C(NC2COC2)N2C=CC(OCCO)=CC2=N1  c:9,11,14,23,29,32,t:7               | Z8878918409 | 1{123} | Cl.Nc1cc(O<br>CCO)ccn1          | 2{426} | CCOC(=O)C<br>Oc1ccc(C=O)<br>cc1 | 3{22} | [C-]<br>]#[N+]C1CO<br>C1  | 28.4 | 24 |
| 832 | 4{46,112,9}   | CNC1=C(N=C2C=CC=CN12)C1=C2C=CC=N2N=C1  c:6,8,13,15,17,21,t:2,4                                | Z8873684790 | 1{46}  | Nc1cccn1                        | 2{112} | O=Cc1cmn2n<br>cccc12            | 3{9}  | C[N+]#[C-]                | 17.3 | 24 |
| 833 | 4{142,427,24} | COC1=CC(CNC2=C(N=C3N2C=CC=C3OCCS(C)(=O)=O)C2=NOC3=C2COCC3)=CC=C1  c:9,13,15,28,35,37,t:2,7,25 | Z8873685374 | 1{142} | CS(=O)(=O)<br>CCOc1ccc<br>nc1N  | 2{427} | O=Cc1noc2C<br>COCc12            | 3{24} | COc1ccc(C[<br>N+]#[C-])c1 | 32.5 | 24 |

|     |               |                                                                                                                  |             |        |                           |        |                                        |       |                        |      |    |
|-----|---------------|------------------------------------------------------------------------------------------------------------------|-------------|--------|---------------------------|--------|----------------------------------------|-------|------------------------|------|----|
| 834 | 4{54,130,53}  | COC1=NN=C(C=C1)C1=C(NCCOCC2=CC=C(C=C2)N2C=C(C=CC2=N1)C(=O)N(C)C  c:4,6,9,18,20,24,26,29,t:2,16                   | Z8849597837 | 1{54}  | Cl.CN(C)C(=O)c1ccc(N)nc1  | 2{130} | COc1ccc(C=O)nn1                        | 3{53} | [C-]#[N+]CCOCc1cccc1   | 29.1 | 24 |
| 835 | 4{78,428,28}  | CCCNC1=C(N=C2C=C(C)C3=NC(C)=CN3N12)C1=CC(OCC2CC2)=C(OC)C=C1  c:14,33,t:4,6,8,11,21,29                            | Z8873684682 | 1{78}  | Cc1cn2nc(N)cc(C)c2n1      | 2{428} | COc1ccc(C=O)cc1OCC2CC2                 | 3{28} | CCC[N+]#[C-]           | 27.3 | 24 |
| 836 | 4{59,279,42}  | CN1C=CN=C1[C@@H]1OCCC[C@H]1C1=C(NC2=C(C)C=CC=C2)N2C=C(CN3CCOCC3)C=CC2=N1  &1:6,11,r,c:2,4,14,17,20,22,36,39,t:26 | Z8878918314 | 1{59}  | Nc1ccc(CN2CCOCC2)cn1      | 2{279} | Cn1ccnc1[C@@H]2OCC[C@H]2C=O  &1:6,11,r | 3{42} | Cc1cccc1[N+]#[C-]      | 31.5 | 24 |
| 837 | 4{291,30,9}   | CNC1=C(N=C2N1C=C(Cl)C=C2Cl)C1CCN(CCl)C(C)=O  c:4,11,t:2,8                                                        | Z8829498779 | 1{291} | Nc1ncc(Cl)cc1Cl           | 2{30}  | CC(=O)N1C(CC(Cl)C=O                    | 3{9}  | C[N+]#[C-]             | 21.8 | 24 |
| 838 | 4{158,429,31} | CSCCNC1=C(N=C2C=NC(=CN12)P(C)(C)=O)C1=C(CCCC1)SC1=CC=CC=C1  c:9,11,30,32,t:5,7,20,28                             | Z8835022878 | 1{158} | CP(=O)(C)c1nc(N)en1       | 2{429} | O=CC1=C(CCCC1)Sc2ccccc2                | 3{31} | CSCC[N+]#[C-]          | 30.1 | 24 |
| 839 | 4{73,430,13}  | COC1=CC=C(CNC2=C(N=C3C=CC4=NC=C(N4N23)C2=C(C)N=C(OC)C=C2)C=C1  c:12,16,23,30,33,t:2,4,8,10,14,26                 | Z8873685436 | 1{73}  | Nc1ccc2nccn2n1            | 2{430} | COc1ccc(C=O)c(C)n1                     | 3{13} | COc1ccc(C[N+]#[C-])cc1 | 26.4 | 24 |
| 840 | 4{172,110,29} | CCOC(=O)CCNC1=C(N=C2N1C=CC1=C2CCO1)C1=CN=C(C=C1)P(C)(C)=O  c:10,14,16,25,27,t:8,23                               | Z8873684941 | 1{172} | Nc1nccc2OCCc21            | 2{110} | CP(=O)(C)c1ccc(C=O)en1                 | 3{29} | CCOC(=O)C[C[N+]#[C-]   | 27.3 | 24 |
| 841 | 4{353,431,15} | CCNC1=C(N=C2C=CC(NS(C)(=O)=O)=CN12)C1CC(Cl)N(C)C(=O)OC(C)(C)C  c:7,14,t:3,5                                      | Z8878918906 | 1{353} | Cl.CS(=O)(=O)Nc1ccc(N)nc1 | 2{431} | CN(C1CC(C1)C=O)C(=O)OC(C)(C)C          | 3{15} | CC[N+]#[C-]            | 27.6 | 23 |
| 842 | 4{92,432,7}   | NC(=O)C1=CC2=NC(=C(NC3CCOCC3)N2C=C1)C1=CSC(=N1)C1=CC=C(Cl)C=C1  c:19,25,33,t:3,5,7,22,28,30                      | Z8873685470 | 1{92}  | NC(=O)c1cnc(N)c1          | 2{432} | Clc1ccc(cc1)c2nc(C=O)es2               | 3{7}  | [C-]#[N+]C1CCOCC1      | 28.4 | 23 |
| 843 | 4{181,433,14} | COCCNC1=C(N=C2N1C=CC1=C2N=CC=N1)C1=CN(N=C1)C1=C(F)C=CC=C1  c:7,11,13,16,18,24,27,30,32,t:5,21                    | Z8878918573 | 1{181} | Nc1nccc2nccn2             | 2{433} | Fe1cccc1n2cc(C=O)en2                   | 3{14} | COCC[N+]#[C-]          | 25.1 | 23 |
| 844 | 4{109,434,34} | COC1=CC(=NC(C)=C1)C1=C(NCC2CCCO2)N2C(C=CC=C2S(N)(=O)=O)=N1  c:4,7,10,22,24,30,t:2                                | Z8873685267 | 1{109} | Cl.Nc1cccc(n1)S(=O)(=O)N  | 2{434} | COc1cc(C)nc(C=O)c1                     | 3{34} | [C-]#[N+]CC1COCO1      | 25.8 | 23 |
| 845 | 4{393,13,5}   | COCCNC1=C(N=C2C=CC(Cl)=C(Cl)N12)C1=C(C)NN=N1  c:10,19,23,t:6,8,13                                                | Z8878918379 | 1{393} | Nc1ccc(Cl)c(Cl)n1         | 2{13}  | Cc1[nH]nn1C=O                          | 3{5}  | COCCC[N+]#[C-]         | 21.8 | 23 |

|     |               |                                                                                                      |             |        |                               |        |                                   |       |                                    |      |    |
|-----|---------------|------------------------------------------------------------------------------------------------------|-------------|--------|-------------------------------|--------|-----------------------------------|-------|------------------------------------|------|----|
| 846 | 4{387,435,12} | CCOC(=O)C1=NOC(=C1)C1=C(NCC2CCOC2)N2C=CC=C(OC(F)F)C2=N1<br> c:8,11,22,31,t:5,24                      | Z8878918785 | 1{387} | Nc1ncccc1<br>OC(F)F           | 2{435} | CCOC(=O)c<br>1cc(C=O)on1          | 3{12} | [C-]<br>]#[N+]CC1C<br>COC1         | 25.6 | 22 |
| 847 | 4{47,436,6}   | CCCCC1=NC(=CN1)C1=C(NCCCC(=O)OCC)N2C=CC(=CC2=N1)S(N)(=O)=O<br> c:6,10,22,24,27,t:4                   | Z8854581177 | 1{47}  | Cl.Nc1cc(cc<br>n1)S(=O)(=O)N  | 2{436} | CCCCc1nc(C<br>=O)c[nH]1           | 3{6}  | CCOC(=O)C<br>CC[N+]#[C-]           | 27.0 | 22 |
| 848 | 4{123,437,15} | CCNC1=C(N=C2C=C(OCCO)C=CN12)C1=C<br>N(CC)N=C1C  c:13,23,t:3,5,7,18                                   | Z8878918598 | 1{123} | Cl.Nc1cc(O<br>CCO)ccn1        | 2{437} | CCn1cc(C=O<br>)c(C)n1             | 3{15} | CC[N+]#[C-]                        | 19.6 | 22 |
| 849 | 4{386,438,5}  | COCCCN1=C(N=C2C=C(C)C=CN12)C1=N<br>C(C)=NC(=C1)C(F)F  c:13,21,23,t:6,8,10,18                         | Z8873684622 | 1{386} | Cc1ccnc(N)<br>c1              | 2{438} | Cc1nc(C=O)<br>cc(n1)C(F)F         | 3{5}  | COCCC[N+]<br>#[C-]                 | 21.4 | 22 |
| 850 | 4{50,439,31}  | COC1=C(C=CC(=C1)C1=C(NCCSC)N2C(C=<br>CC=C2P(C)(C)=O)=N1)S(C)(=O)=O<br> c:4,6,9,18,20,26,t:2          | Z8873684911 | 1{50}  | CP(=O)(C)c<br>1cccc(N)n1      | 2{439} | COc1cc(C=O<br>)ccc1S(=O)(<br>=O)C | 3{31} | CSCC[N+]#[<br>C-]                  | 27.6 | 22 |
| 851 | 4{48,440,22}  | CS(=O)(=O)C1=CC2=NC(=C(NC3COC3)N2C<br>=C1)C1=CC=C(C=C1)N1C=C(Br)C=N1<br> c:18,23,25,32,t:4,6,8,21,29 | Z8873684765 | 1{48}  | CS(=O)(=O)<br>c1ccnc(N)c<br>1 | 2{440} | Br1enn(c1)c<br>2ccc(C=O)cc<br>2   | 3{22} | [C-]<br>]#[N+]C1CO<br>C1           | 28.9 | 22 |
| 852 | 4{83,441,31}  | CCC(C)C(OC)C1=C(NCCSC)N2C=C(C=CC2<br>=N1)P(C)(C)=O  c:7,15,17,20                                     | Z8837933137 | 1{83}  | CP(=O)(C)c<br>1ccc(N)nc1      | 2{441} | CCC(C)C(O<br>C)C=O                | 3{31} | CSCC[N+]#[<br>C-]                  | 22.5 | 22 |
| 853 | 4{146,164,51} | CN1N=C(C2=C1CCOC2)C1=C(NCCNC(=O)<br>OC(C)(C)C)N2C=C(C=CC2=N1)S(C)(=O)=O<br> c:2,4,12,26,28,31        | Z8855619628 | 1{146} | CS(=O)(=O)<br>c1ccc(N)nc<br>1 | 2{164} | Cn1nc(C=O)<br>c2COCCc21           | 3{51} | CC(C)(C)OC<br>(=O)NCC[N<br>+]#[C-] | 28.0 | 21 |
| 854 | 4{187,375,46} | COCC1=C(N=CO1)C1=C(NCC(C)=C)N2C=C<br>(Cl)C(=CC2=N1)C#N  c:5,9,20,23,t:3,17                           | Z8873684920 | 1{187} | Nc1cc(C#N<br>)c(Cl)cn1        | 2{375} | COCC1ocnc1<br>C=O                 | 3{46} | CC(=C)C[N+]<br>]#[C-]              | 20.0 | 21 |
| 855 | 4{83,442,37}  | COC(=O)C1CC(C1)NC1=C(N=C2C=CC(=CN<br>12)P(C)(C)=O)C1=CC2=C(COC2)C=C1<br> c:14,16,33,t:10,12,25,27    | Z8846492124 | 1{83}  | CP(=O)(C)c<br>1ccc(N)nc1      | 2{442} | O=Cc1ccc2C<br>OCc2c1              | 3{37} | COC(=O)C1<br>CC(C1)[N+]<br>#[C-]   | 24.6 | 21 |
| 856 | 4{166,443,22} | OCCSCC1=CC2=NC(=C(NC3COC3)N2C=C1<br>)C1=C2N=CC=CC2=C(F)C=C1<br> c:19,22,24,26,32,t:5,7,9,29          | Z8873685480 | 1{166} | Nc1cc(CSC<br>CO)ccn1          | 2{443} | Fc1ccc(C=O)<br>c2ncccc12          | 3{22} | [C-]<br>]#[N+]C1CO<br>C1           | 23.7 | 21 |
| 857 | 4{181,344,14} | COCCNC1=C(N=C2N1C=CC1=C2N=CC=N1)<br>C1=C(C)C=NN1COC<br> c:7,11,13,16,18,21,24,t:5                    | Z8873684762 | 1{181} | Nc1nccc2nc<br>cnc12           | 2{344} | COc1nccc(C<br>)c1C=O              | 3{14} | COCC[N+]#[<br>C-]                  | 20.3 | 20 |

|     |               |                                                                                                     |             |        |                           |        |                             |       |                             |      |    |
|-----|---------------|-----------------------------------------------------------------------------------------------------|-------------|--------|---------------------------|--------|-----------------------------|-------|-----------------------------|------|----|
| 858 | 4{95,444,35}  | CSCCCNC1=C(N=C2C=CC(=CN12)C(F)F)C1=C(O)C=CN=C1  c:10,12,20,23,25,t:6,8                              | Z8873685420 | 1{95}  | Nc1ccc(en1)C(F)F          | 2{444} | Oc1ccncc1C=O                | 3{35} | CSCCC[N+]#[C-]              | 20.1 | 20 |
| 859 | 4{330,445,29} | CCOC(=O)CCNC1=C(N=C2C=CC(=CN12)S(=O)(=O)N(C)C)C1=NOC(=C1)C(C)(C)C  c:12,14,28,t:8,10,25             | Z8873685490 | 1{330} | CN(C)S(=O)(=O)c1ccc(N)nc1 | 2{445} | CC(C)(C)c1cc(C=O)no1        | 3{29} | CCOC(=O)C[N+]#[C-]          | 25.5 | 20 |
| 860 | 4{22,307,13}  | COC1=CC=C(CNC2=C(N=C3C=CC(CI)=NN23)C2=CN=C(CI)N2C)C=C1  c:12,15,28,t:2,4,8,10,20,22                 | Z8835022916 | 1{22}  | Nc1ccc(CI)nn1             | 2{307} | Cn1c(CI)ncc1C=O             | 3{13} | COc1ccc(C[N+]#[C-])cc1      | 22.0 | 20 |
| 861 | 4{351,446,28} | CCCNC1=C(N=C2C=CC3=C(C(O)CC3)N12)C1=CC(=CC=C1)C(=O)NC  c:8,22,24,t:4,6,10,20                        | Z8873684684 | 1{351} | Nc1ccc2CC(C(O)c2n1        | 2{446} | CNC(=O)c1ccc(C=O)c1         | 3{28} | CCC[N+]#[C-]                | 19.8 | 20 |
| 862 | 4{101,260,6}  | CCOC(=O)CCCNC1=C(N=C2N1C=C(CO)C=C2CI)C1=NOC(C)=C1  c:11,19,27,t:9,15,23                             | Z8873685370 | 1{101} | Nc1ncc(CO)cc1Cl           | 2{260} | Cc1cc(C=O)no1               | 3{6}  | CCOC(=O)C[N+]#[C-]          | 21.1 | 20 |
| 863 | 4{181,447,6}  | CCOC(=O)CCCNC1=C(N=C2N1C=CC1=C2N=CC=N1)C1=CC=C(C=C1)C#CC(C)(C)O  c:11,15,17,20,22,27,29,t:9,25      | Z8873684692 | 1{181} | Nc1nccc2ncnc12            | 2{447} | CC(C)(O)C#Cc1ccc(C=O)cc1    | 3{6}  | CCOC(=O)C[N+]#[C-]          | 24.4 | 20 |
| 864 | 4{28,448,7}   | COC1=C2OCOC2=CC(=C1)C1=C(NC2CCOC2)N2C=CC(=CC2=N1)C1=NOC=N1  c:2,8,10,13,24,26,29,35,t:32            | Z8878918875 | 1{28}  | Cl.Nc1cc(ccn1)c2ncon2     | 2{448} | COc1cc(C=O)cc2OCOC21        | 3{7}  | [C-]#[N+]C1CCOCC1           | 23.2 | 20 |
| 865 | 4{218,34,61}  | CC(C)(C)OC(=O)NCCCNC1=C(N=C2C=CC(=NN12)C(C)(C)C)C1=CC=C(C=C1)P(C)(C)=O  c:16,18,29,31,t:12,14,27    | Z8803896931 | 1{218} | CC(C)(C)c1ccc(N)nn1       | 2{34}  | CP(=O)(C)c1ccc(C=O)cc1      | 3{61} | CC(C)(C)OC(=O)NCCC[N+]#[C-] | 26.6 | 20 |
| 866 | 4{46,58,9}    | CNC1=C(N=C2C=CC=CN12)C1=NSN=C1  c:6,8,16,t:2,4,13                                                   | Z8855739152 | 1{46}  | Nc1cccn1                  | 2{58}  | O=Cc1cnsn1                  | 3{9}  | C[N+]#[C-]                  | 12.2 | 19 |
| 867 | 4{155,449,14} | COCCNC1=C(N=C2N1C=CC=C2CI)C1=C(C)C=C(S1)C(N)=O  c:7,11,13,17,20,t:5                                 | Z8878918329 | 1{155} | Nc1ncccc1Cl               | 2{449} | Cc1cc(sc1C=O)C(=O)N         | 3{14} | COCC[N+]#[C-]               | 19.1 | 19 |
| 868 | 4{176,450,14} | COCCNC1=C(N=C2N1C=CN=C2N1CCCC1)C1=CC(=CC=C1)S(=O)(=O)N(C)C  c:7,11,13,24,26,t:5,22                  | Z8846491730 | 1{176} | Nc1ncnc1N2CCCC2           | 2{450} | CN(C)S(=O)(=O)c1cccc(C=O)c1 | 3{14} | COCC[N+]#[C-]               | 23.1 | 19 |
| 869 | 4{213,92,31}  | COC1=CC=C(F)C2=NC(C3=CC(C)=NO3)=C(NCCSC)N12  c:13,t:2,4,7,10,16                                     | Z8873684810 | 1{213} | COc1ccc(F)c(N)n1          | 2{92}  | Cc1cc(C=O)on1               | 3{31} | CSCC[N+]#[C-]               | 17.3 | 19 |
| 870 | 4{46,27,9}    | CNC1=C(N=C2C=CC=CN12)C1=NN(C)C(C)=N1  c:6,8,18,t:2,4,13                                             | Z8855739086 | 1{46}  | Nc1cccn1                  | 2{27}  | Cc1nc(C=O)nn1C              | 3{9}  | C[N+]#[C-]                  | 12.4 | 19 |
| 871 | 4{330,229,69} | COC1=C(NC2=C(N=C3C=CC(=CN23)S(=O)(=O)N(C)C)C2=CN=C(OCCO)C=C2)C=CC=C1  c:2,9,11,30,33,35,t:5,7,22,24 | Z8878918769 | 1{330} | CN(C)S(=O)(=O)c1ccc(N)nc1 | 2{229} | OCCOCc1ccc(C=O)en1          | 3{69} | COc1cccc1[N+]#[C-]          | 24.3 | 19 |

|     |               |                                                                                                            |             |        |                                  |        |                        |       |                               |      |    |
|-----|---------------|------------------------------------------------------------------------------------------------------------|-------------|--------|----------------------------------|--------|------------------------|-------|-------------------------------|------|----|
| 872 | 4{327,451,34} | COC(=O)C1=C(F)C2=NC(=C(NCC3CCCO3)N2C=C1)C1=NC=CC(=C1)C(F)F<br> c:4,21,26,28,t:7,9,24                       | Z8878918780 | 1{327} | COC(=O)c1ccnc(N)c1F              | 2{451} | FC(F)c1ccnc(C=O)c1     | 3{34} | [C-]<br>]#[N+]CC1C<br>CCO1    | 20.8 | 18 |
| 873 | 4{218,334,21} | CC1=C(N=CO1)C1=C(NCC2CC2)N2N=C(C=CC2=N1)C(C)(C)C  c:3,7,16,18,21,t:1                                       | Z8837933146 | 1{218} | CC(C)(C)c1ccc(N)nn1              | 2{334} | Cc1ocnc1C=O            | 3{21} | [C-]<br>]#[N+]CC1C<br>C1      | 16.0 | 18 |
| 874 | 4{331,452,49} | CN(C)CCN(C)CC1=CN2C(C=C1)=NC(=C2N1)CC(F)(F)C1)C1=CC=C(C=C1)C(N)=O<br> c:12,14,16,29,31,t:8,27              | Z8878918445 | 1{331} | Cl.Cl.Cl.CN(C)CCN(C)Cc1ccc(N)nc1 | 2{452} | NC(=O)c1ccc(C=O)cc1    | 3{49} | FC1(F)CC(C1)[N+]#[C-]         | 22.4 | 18 |
| 875 | 4{81,453,9}   | CNC1=C(N=C2C=NC=CN12)C1=CC(C=C)=CN=C1  c:6,8,17,19,t:2,4,13                                                | Z8873684792 | 1{81}  | Nc1cncn1                         | 2{453} | Cl.C=Cc1cnc(C=O)c1     | 3{9}  | C[N+]#[C-]                    | 12.3 | 18 |
| 876 | 4{394,169,10} | FC1=C(C=C)C=CC2=NC(=C(NC3CCOC3)N12)C1=NNC2=C1N=CC=C2<br> c:1,5,24,27,29,t:7,9,21                           | Z8878918526 | 1{394} | Nc1ccc(C=C)c(F)n1                | 2{169} | O=Cc1n[nH]c2ccnc12     | 3{10} | [C-]<br>]#[N+]C1CC<br>OC1     | 17.7 | 18 |
| 877 | 4{93,454,61}  | COC(C)CC1=C(NCCCNC(=O)OC(C)(C)C)N2C=C(OC)N=CC2=N1  c:5,24,27,t:20                                          | Z8878918849 | 1{93}  | COc1cnc(N)c1                     | 2{454} | COC(C)CC=O             | 3{61} | CC(C)(C)OC(=O)NCCC[N+]#[C-]   | 18.6 | 18 |
| 878 | 4{103,455,59} | CC1=C(C(Br)=NO1)C1=C(NCCC2=CC(F)=C(C=C2)N2C(C=NC=C2CO)=N1<br> c:4,8,16,18,23,25,29,t:1,13                  | Z8878918462 | 1{103} | Nc1cnc(CO)n1                     | 2{455} | Cc1onc(Br)c1C=O        | 3{59} | Fe1cccc(CC[N+]#[C-])c1        | 21.0 | 17 |
| 879 | 4{171,216,53} | COC(=O)C1=NC=C(S1)C1=C(NCCOCC2=CC=CC=C2)N2C=CC(=CC2=N1)N1C=CN=C1<br> c:6,10,19,21,25,27,30,34,36,t:4,17    | Z8878918572 | 1{171} | Nc1cc(cen1)n2cnc2                | 2{216} | COC(=O)c1ncc(C=O)s1    | 3{53} | [C-]<br>]#[N+]CCOC<br>c1cccc1 | 22.2 | 17 |
| 880 | 4{120,456,71} | COC1=CC(NC2=C(N=C3C=C(C=CN23)C2=C(N(C)N=C2)C2=CC(=CO2)S(N)(=O)=O)=CC=C1  c:10,12,21,26,33,35,t:2,6,8,17,24 | Z8873685316 | 1{120} | Cn1cc(en1)c2cnc(N)c2             | 2{456} | NS(=O)(=O)c1coc(C=O)c1 | 3{71} | COc1cccc([N+]#[C-])c1         | 21.7 | 17 |
| 881 | 4{186,457,29} | CCOC(=O)CCNC1=C(N=C2C=C(C=CN12)S(=O)(=O)N(C)C)C1=NN=C(C=C1)C(F)(F)F<br> c:12,14,27,29,t:8,10,25            | Z8878918863 | 1{186} | Cl.CN(C)S(=O)(=O)c1ccnc(N)c1     | 2{457} | FC(F)(F)c1ccc(C=O)nn1  | 3{29} | CCOC(=O)C[N+]#[C-]            | 22.6 | 17 |
| 882 | 4{78,458,51}  | COC1=C(C)C=CC(=N1)C1=C(NCCNC(=O)OC(C)(C)C)N2N3C=C(C)N=C3C(C)=CC2=N1<br> c:2,5,7,10,28,32,35,t:25           | Z8878918675 | 1{78}  | Cc1cn2nc(N)cc(C)c2n1             | 2{458} | COc1nc(C=O)ccc1C       | 3{51} | CC(C)(C)OC(=O)NCC[N+]#[C-]    | 21.1 | 17 |
| 883 | 4{363,459,62} | COC(=O)C1=CC2=NC(=C(NC3(CCCC3)C(=O)OC)N2C=C1)C1=NNC(C)=C1C<br> c:23,30,t:4,6,8,26                          | Z8873684726 | 1{363} | COC(=O)c1ccnc(N)c1               | 2{459} | Cc1[nH]nc(C=O)c1C      | 3{62} | COC(=O)C1(CCCC1)[N+]#[C-]     | 18.5 | 17 |



|     |               |                                                                                                          |             |        |                       |        |                                    |       |                             |      |    |
|-----|---------------|----------------------------------------------------------------------------------------------------------|-------------|--------|-----------------------|--------|------------------------------------|-------|-----------------------------|------|----|
| 884 | 4{35,396,13}  | COC1=CC=C(CNC2=C(N=C3C=CC(C)=CN23)C2=CN=C3COCCN23)C=C1<br> c:12,15,31,t:2,4,8,10,20,22                   | Z8873684635 | 1{35}  | Cc1ccc(N)nc1          | 2{396} | O=Cc1cnc2COCc1n2                   | 3{13} | COc1ccc(C[N+]#[C-])cc1      | 17.3 | 16 |
| 885 | 4{193,460,60} | CNC(=O)C1=CN2C(NC3=CC(=CC=C3)C(=O)OC)=C(N=C2C=C1)C1=NC=C(C)O1<br> c:11,13,19,21,24,t:4,9,27,29           | Z8835022877 | 1{193} | CNC(=O)c1ccc(N)nc1    | 2{460} | Cc1cnc(C=O)o1                      | 3{60} | COC(=O)c1ccc([N+]#[C-])c1   | 17.9 | 16 |
| 886 | 4{395,461,7}  | CCN1N=CC(=C1F)C1=C(NC2CCOCC2)N2N=C(C=C(C)C2=N1)C(F)(F)F<br> c:3,5,9,20,26,t:22                           | Z8878918396 | 1{395} | Cc1cc(nnc1N)C(F)(F)F  | 2{461} | CCn1ncc(C=O)c1F                    | 3{7}  | [C-]#[N+]C1CCOCC1           | 18.1 | 16 |
| 887 | 4{137,284,20} | COC1=CC(C)=C(NC2=C(N=C3C=CC(C)=NN23)C2=C(C)N=CC=N2)C=C1<br> c:12,15,20,23,25,28,t:2,5,8,10               | Z8873684616 | 1{137} | Cc1ccc(N)nc1          | 2{284} | Cc1nccnc1C=O                       | 3{20} | COc1ccc([N+]#[C-])c(C)c1    | 15.7 | 16 |
| 888 | 4{99,229,50}  | NS(=O)(=O)C1=CN2C(NC3=CC4=C(OCCO4)C=C3)=C(N=C2C=C1)C1=CN=C(OCCO)C=C1<br> c:18,20,22,25,36,t:4,9,11,28,30 | Z8837933134 | 1{99}  | Nc1ccc(en1)S(=O)(=O)N | 2{229} | OCCOc1ccc(C=O)en1                  | 3{50} | [C-]#[N+]c1ccc2OCCOc2c1     | 21.0 | 16 |
| 889 | 4{103,354,40} | CCOC(=O)C1=CC=C(NC2=C(N=C3C=NC=C(CO)N23)C2=C(C=CC=C2)P(C)(C)=O)C=C1<br> c:14,25,27,34,t:5,7,10,12,16,23  | Z8878918669 | 1{103} | Nc1cnc(C)Onc1         | 2{354} | CP(=O)(C)c1cccc1C=O                | 3{40} | CCOC(=O)c1ccc([N+]#[C-])cc1 | 20.1 | 16 |
| 890 | 4{78,462,39}  | CCOCCNC1=C(N=C2C=C(C)C3=NC(C)=CN3N12)C1=C(Br)C=CC(C)=C1F<br> c:16,23,26,29,t:6,8,10,13                   | Z8873685495 | 1{78}  | Cc1en2nc(N)cc(C)c2n1  | 2{462} | Cc1ccc(Br)c(C=O)c1F                | 3{39} | CCOCC[N+]#[C-]              | 19.7 | 16 |
| 891 | 4{291,274,13} | COC1=CC=C(CNC2=C(CC3(CCOCC3)C#N)N=C3N2C=C(Cl)C=C3Cl)C=C1<br> c:8,20,27,31,t:2,4,24                       | Z8873685489 | 1{291} | Nc1ncc(Cl)cc1Cl       | 2{274} | O=CCC1(CCOC1)C#N                   | 3{13} | COc1ccc(C[N+]#[C-])cc1      | 18.8 | 16 |
| 892 | 4{167,463,5}  | COCCNC1=C(N=C2N1C(C)=CN=C2C)C1=C(C)C(I)=NN1C<br> c:8,13,15,19,23,t:6                                     | Z8873684713 | 1{167} | Cc1cnc(C)c(N)nc1      | 2{463} | Cc1c(I)nn(C)c1C=O                  | 3{5}  | COCC[N+]#[C-]               | 18.9 | 15 |
| 893 | 4{50,464,31}  | CSCCNC1=C(N=C2C=CC=C(N12)P(C)(C)=O)C1=CC2=C(C=CC=C2)N2N=NN=C12<br> c:9,11,24,26,30,t:5,7,20,22,32        | Z8873685251 | 1{50}  | CP(=O)(C)c1ccc(N)nc1  | 2{464} | O=Cc1ccccc2n3nnnc13                | 3{31} | CSCC[N+]#[C-]               | 17.7 | 14 |
| 894 | 4{230,349,34} | CC(O)C1=CC(Br)=CN2C(NCC3CCCO3)=C(N=C12)C1C[C@H]2OC(C)(C)O[C@H]2C1<br> c:6,17,t:3,19                      | Z8873685493 | 1{230} | CC(O)c1cc(Br)nc1N     | 2{349} | CC1(C)O[C@@@H]2CC(C)[C@@@H]2O1)C=O | 3{34} | [C-]#[N+]CC1CCO1            | 18.8 | 14 |
| 895 | 4{79,129,13}  | COC1=CC=C(CNC2=C(N=C3C=NC=C(C)N23)C2=CC=CC3=NC=NN23)C=C1<br> c:12,22,26,31,t:2,4,8,10,14,20,24           | Z8878918798 | 1{79}  | Cc1nccc(N)nc1         | 2{129} | O=Cc1cccc2ncnn12                   | 3{13} | COc1ccc(C[N+]#[C-])cc1      | 15.0 | 14 |

|     |               |                                                                                                               |             |        |                          |        |                           |       |                              |      |    |
|-----|---------------|---------------------------------------------------------------------------------------------------------------|-------------|--------|--------------------------|--------|---------------------------|-------|------------------------------|------|----|
| 896 | 4{382,305,71} | COCC1=NC(=CN1)C1=C(NC2=CC(OC)=CC=C2)N2C=C(N=CC2=N1)C(F)(F)F<br> c:5,9,16,18,22,24,27,t:3,12                   | Z8878918670 | 1{382} | Nc1cnc(en1)C(F)(F)F      | 2{305} | COCC1nc(C=O)c[nH]1        | 3{71} | COc1cccc([N+][C-])c1         | 16.1 | 14 |
| 897 | 4{179,465,23} | COC(=O)CCC(NC1=C(N=C2C=C(OC)C=CN12)C1=C(C1)C=C(C)C=N1)C(=O)OC<br> c:16,21,27,t:8,10,12,24                     | Z8878918401 | 1{179} | COc1ccnc(N)c1            | 2{465} | Cc1cnc(C=O)c(Cl)c1        | 3{23} | COC(=O)CC(C([N+][C-])C(=O)OC | 17.2 | 14 |
| 898 | 4{396,466,23} | COC(=O)CCC(NC1=C(N=C2C=CC(=NN12)C1=CN(C)N=C1)C1=CC(Cl)=C(C)N=C1)C(=O)OC<br> c:12,14,23,32,t:8,10,19,26,29     | Z8829498618 | 1{396} | Cn1cc(en1)c2ccc(N)nn2    | 2{466} | Cc1ncc(C=O)cc1Cl          | 3{23} | COC(=O)CC(C([N+][C-])C(=O)OC | 19.0 | 14 |
| 899 | 4{181,467,14} | COCCNC1=C(N=C2N1C=CC1=C2N=CC=N1)C1=C(C)SC(Br)=N1<br> c:7,11,13,16,18,21,26,t:5                                | Z8855739274 | 1{181} | Nc1nccc2ncnc12           | 2{467} | Cc1sc(Br)nc1C=O           | 3{14} | COCC[N+][C-]                 | 15.9 | 14 |
| 900 | 4{54,468,37}  | COC(=O)C1CC(C1)NC1=C(CC(C)SC)N=C2C=CC(=CN12)C(=O)N(C)C<br> c:10,19,21,t:17                                    | Z8873685443 | 1{54}  | Cl.CN(C)C(=O)c1ccc(N)nc1 | 2{468} | CSC(C)CC=O                | 3{37} | COC(=O)C1CC(C1)[N+][C-]      | 15.2 | 14 |
| 901 | 4{169,469,11} | CNC(=O)C1=NN2C(C=C1)=NC(C1CCSC1)=C2NCC1=CC(Br)=CC=C1<br> c:8,10,18,26,28,t:4,23                               | Z8829498482 | 1{169} | CNC(=O)c1ccc(N)nn1       | 2{469} | O=CC1CCSC1                | 3{11} | Br1cccc(C[N+][C-])c1         | 16.5 | 14 |
| 902 | 4{72,470,12}  | COC1=NC(Br)=CN2C(NCC3CCOC3)=C(N=C12)C1=COC(Br)=N1<br> c:5,16,26,t:2,18,22                                     | Z8878918789 | 1{72}  | COc1nc(Br)nc1N           | 2{470} | Br1nc(C=O)co1             | 3{12} | [C-][N+][C]C1COC1            | 17.5 | 14 |
| 903 | 4{251,471,62} | COC(=O)C1(CCCC1)NC1=C(N=C2C=CC3=C(NC(=O)C=C3)N12)C1=NC=C2OCOC2=C1<br> c:15,22,36,t:11,13,17,28,30             | Z8873684899 | 1{251} | Nc1ccc2ccc(=O)[nH]c2n1   | 2{471} | O=Cc1cc2OCoc2en1          | 3{62} | COC(=O)C1(CCCC1)[N+][C-]     | 16.4 | 14 |
| 904 | 4{73,94,11}   | BrC1=CC(CNC2=C(N=C3C=CC4=NC=CN4N23)C2=NC=CN=C2)=CC=C1<br> c:10,14,23,25,27,29,t:1,6,8,12,21                   | Z8873685473 | 1{73}  | Nc1ccc2nccn2n1           | 2{94}  | O=Cc1cncn1                | 3{11} | Br1cccc(C[N+][C-])c1         | 15.3 | 13 |
| 905 | 4{83,472,26}  | COC(=O)C1=CC2=C(C=NN2C=C1)C1=C(NC2=CC=C(F)C=C2)N2C=C(C=CC2=N1)P(C)(C)=O<br> c:8,12,15,24,28,30,33,t:4,6,19,21 | Z8846491855 | 1{83}  | CP(=O)(C)c1ccc(N)nc1     | 2{472} | COC(=O)c1cnc2ncc(C=O)c2c1 | 3{26} | Fe1ccc(C[N+][C-])cc1         | 17.9 | 13 |
| 906 | 4{397,177,5}  | COCCNC1=C(CC2CC(C2)C(=O)OC)N=C2N1C=CC(C)=C2C<br> c:6,18,22,25                                                 | Z8873684719 | 1{397} | Cl.Cc1ccnc(N)c1C         | 2{177} | COC(=O)C1CC(CC=O)C1       | 3{5}  | COCCC[N+][C-]                | 13.1 | 13 |
| 907 | 4{229,473,68} | COC1=CC(C)=C(C=C1)C1=C(NC2CCCCC2)N2C=C(C=CC2=N1)S(O)(=O)=O<br> c:5,7,10,21,23,26,t:2                          | Z8829498563 | 1{229} | Nc1ccc(en1)S(=O)(=O)O    | 2{473} | COc1ccc(C=O)c(C)c1        | 3{68} | [C-][N+][C]1CCCCC1           | 15.0 | 13 |

|     |               |                                                                                                       |             |        |                       |        |                             |       |                            |      |    |
|-----|---------------|-------------------------------------------------------------------------------------------------------|-------------|--------|-----------------------|--------|-----------------------------|-------|----------------------------|------|----|
| 908 | 4{222,193,62} | COC(=O)C1=CN2C(NC3(CCCC3)C(=O)OC)=C(N=C2C=N1)C1=NN2CCCCOC2=C1<br> c:18,20,23,35,t:4,26                | Z8808559886 | 1{222} | Cl.COC(=O)c1cnc(N)cn1 | 2{193} | O=Cc1cc2OCCCCn2n1           | 3{62} | COC(=O)C1(CCCC1)[N+]#[C-]  | 16.3 | 13 |
| 909 | 4{78,474,51}  | CC1=CN2N3C(NCCNC(=O)OC(C)(C)C)=C(N=C3C=C(C)C2=N1)C1=NNC2=C1C=CC=N2<br> c:16,18,25,31,34,36,t:1,21,28  | Z8878918667 | 1{78}  | Cc1cn2nc(N)cc(C)c2n1  | 2{474} | O=Cc1n[nH]c2ncccc12         | 3{51} | CC(C)(C)OC(=O)NCC[N+]#[C-] | 16.5 | 13 |
| 910 | 4{167,475,5}  | COCCNC1=C(N=C2N1C(C)=CN=C2C)C1=CC2=C(O1)C(F)=NC=C2<br> c:8,13,15,21,26,28,t:6,19                      | Z8878918907 | 1{167} | Cc1cnc(C)c(N)n1       | 2{475} | Fe1nccc2cc(C=O)oc12         | 3{5}  | COCCC[N+]#[C-]             | 12.8 | 13 |
| 911 | 4{398,130,32} | COC1=NN=C(C=C1)C1=C(NC2CCC2)N2C=CC(=CC2=N1)C(C)(F)F  c:4,6,9,18,20,23,t:2                             | Z8854581139 | 1{398} | Cl.CC(F)(F)c1cnc(N)c1 | 2{130} | COc1ccc(C=O)nn1             | 3{32} | [C-]#[N+]C1CC1             | 12.4 | 13 |
| 912 | 4{27,368,21}  | COC1=CC=CC2=NC(=C(NCC3CC3)N12)C1=NN=C(C)C(C)=C1  c:4,25,t:2,6,8,19,21                                 | Z8855739205 | 1{27}  | COc1cccc(N)n1         | 2{368} | Cc1cc(C=O)nnc1C             | 3{21} | [C-]#[N+]CC1C1             | 10.9 | 13 |
| 913 | 4{99,476,57}  | COC(=O)CCC1=NOC=C1C1=C(NCC2=CC=C(C=C2)N2C=C(C=CC2=N1)S(N)(=O)=O<br> c:9,12,18,20,24,26,29,t:6,16      | Z8854581136 | 1{99}  | Nc1ccc(en1)S(=O)(=O)N | 2{476} | COC(=O)CCc1nocc1C=O         | 3{57} | [C-]#[N+]Cc1ccc1           | 15.4 | 13 |
| 914 | 4{399,477,37} | COC(=O)C1CC(C1)NC1=C(N=C2C=CC(OC(C)C)=NN12)C(NC(=O)OC(C)(C)C)C1COC1<br> c:14,20,t:10,12               | Z8846492223 | 1{399} | CC(C)Oc1ccc(N)nn1     | 2{477} | CC(C)(C)OC(=O)NC(C=O)C1COC1 | 3{37} | COC(=O)C1CC(C1)[N+]#[C-]   | 16.5 | 12 |
| 915 | 4{77,478,5}   | COCCNC1=C(N=C2C=CC(=CN12)C1=CN=CC=C1)C1=CN(C)C(=O)C2=C1C=CN=C2<br> c:10,12,19,21,30,33,35,t:6,8,17,24 | Z8873684782 | 1{77}  | Nc1ccc(en1)c2cccnc2   | 2{478} | Cn1cc(C=O)c2ccncc2c1=O      | 3{5}  | COCCC[N+]#[C-]             | 14.9 | 12 |
| 916 | 4{181,479,14} | COCCNC1=C(N=C2N1C=CC1=C2N=CC=N1)C1=CN(N=C1)C1=CC(C)=CC=C1<br> c:7,11,13,16,18,24,30,32,t:5,21,27      | Z8878918565 | 1{181} | Nc1nccc2ncnc12        | 2{479} | Cc1cccc(c1)n2cc(C=O)cn2     | 3{14} | COCC[N+]#[C-]              | 13.4 | 12 |
| 917 | 4{67,396,9}   | CNC1=C(N=C2C=CC=C(C)N12)C1=CN=C2C OCCN12  c:6,t:2,4,8,14,16                                           | Z8873685379 | 1{67}  | Cc1cccc(N)n1          | 2{396} | O=Cc1cnc2C OCCn12           | 3{9}  | C[N+]#[C-]                 | 9.5  | 12 |
| 918 | 4{169,25,13}  | CNC(=O)C1=NN2C(C=C1)=NC(=C2NCC1=C(C=OC)C=C1)C1=CN=C(N=C1)C1CCOCC1<br> c:8,10,12,23,28,30,t:4,17,19,26 | Z8855619638 | 1{169} | CNC(=O)c1ccc(N)nn1    | 2{25}  | O=Cc1cnc(nc1)C2CCOCC2       | 3{13} | COc1ccc(C[N+]#[C-])cc1     | 15.6 | 12 |
| 919 | 4{198,189,31} | CSCCNC1=C(N=C2C=NC(C#C)=C(C1)N12)C1=CN(N=N1)C1CCOCC1  c:9,22,t:5,7,13,19                              | Z8801681831 | 1{198} | Nc1cnc(C#C)c(Cl)n1    | 2{189} | O=Cc1cn(nn1)C2CCOCC2        | 3{31} | CSCC[N+]#[C-]              | 13.2 | 12 |

|     |               |                                                                                                    |             |        |                       |        |                           |       |                                 |      |    |
|-----|---------------|----------------------------------------------------------------------------------------------------|-------------|--------|-----------------------|--------|---------------------------|-------|---------------------------------|------|----|
| 920 | 4{88,480,34}  | FC1=C(Br)C=CN2C(NCC3CCCO3)=C(N=C12)C1=CC2=C(CCOC2)N=C1<br> c:1,4,15,30,t:17,21,23                  | Z8878918389 | 1{88}  | Nc1ncce(Br)c1F        | 2{480} | O=Cc1cnc2C<br>COCc2c1     | 3{34} | [C-]<br>#[N+]CC1C<br>CCO1       | 14.0 | 12 |
| 921 | 4{150,481,22} | CC1=NNC2=C1C=CC(=C2)C1=C(NC2COC2)N2C=CC(=CC2=N1)C1CCOC1<br> c:4,7,9,12,21,23,26,t:1                | Z8873685244 | 1{150} | Nc1cc(ccn1)C2CCOC2    | 2{481} | Cc1n[nH]c2cc(C=O)ccc12    | 3{22} | [C-]<br>#[N+]C1CO<br>C1         | 11.8 | 11 |
| 922 | 4{370,281,10} | COC(=O)C1=NN=C(C=C1)C1=C(NC2CCOC2)N2C=CC(Br)=C(OC)C2=N1<br> c:6,8,11,21,29,t:4,24                  | Z8878918604 | 1{370} | COc1c(N)nccc1Br       | 2{281} | COC(=O)c1ccc(C=O)nn1      | 3{10} | [C-]<br>#[N+]C1CC<br>OC1        | 13.5 | 11 |
| 923 | 4{158,482,7}  | CP(C)(=O)C1=CN2C(C=N1)=NC(=C2NC1CCOCC1)C1=CC(=CC(C1)=C1)C(F)(F)F<br> c:8,10,12,25,28,t:4,23        | Z8855739184 | 1{158} | CP(=O)(C)c1cnc(N)cn1  | 2{482} | FC(F)(F)c1cc(C1)cc(C=O)c1 | 3{7}  | [C-]<br>#[N+]C1CC<br>OCC1       | 13.7 | 11 |
| 924 | 4{351,483,71} | COC1=CC(NC2=C(N=C3C=CC4=C(C(O)CC4)N23)C2=CN(C=N2)C2CC2)=CC=C1<br> c:10,25,31,33,t:2,6,8,12,22      | Z8849597808 | 1{351} | Nc1ccc2CC(C(O)c2n1    | 2{483} | Cl.O=Cc1cn(Cn1)C2CC2      | 3{71} | COc1cccc([N+])#[C-]c1           | 11.5 | 11 |
| 925 | 4{99,484,50}  | NS(=O)(=O)C1=CN2C(NC3=CC4=C(OCCO4)C=C3)=C(N=C2C=C1)C1=CC(=CS1)C#N<br> c:18,20,22,25,30,t:4,9,11,28 | Z8873685404 | 1{99}  | Nc1ccc(en1)S(=O)(=O)N | 2{484} | O=Cc1cc(C#N)cs1           | 3{50} | [C-]<br>#[N+]c1ccc2OCCOc2c1     | 12.8 | 10 |
| 926 | 4{166,173,32} | CN1N=C(N=C1C1=C(NC2CCC2)N2C=CC(CSCCO)=CC2=N1)C(F)(F)F<br> c:2,4,7,16,23,26                         | Z8878918387 | 1{166} | Nc1cc(CSCCO)cn1       | 2{173} | Cn1nc(nc1C=O)C(F)(F)F     | 3{32} | [C-]<br>#[N+]C1CC<br>C1         | 11.9 | 10 |
| 927 | 4{79,485,13}  | COC1=CC=C(CNC2=C(N=C3C=NC=C(C)N23)C2=NOC3=C2CCC3)C=C1<br> c:12,23,30,t:2,4,8,10,14,20              | Z8873684741 | 1{79}  | Cc1cnc(N)n1           | 2{485} | O=Cc1noc2C<br>CCc12       | 3{13} | COc1ccc(C[N+])#[C-]cc1          | 10.2 | 10 |
| 928 | 4{146,486,46} | CN1C(Cl)=NC(Cl)=C1C1=C(NCC(C)=C)N2C=C(C=CC2=N1)S(C)(=O)=O<br> c:3,6,9,17,19,22                     | Z8878918499 | 1{146} | CS(=O)(=O)c1ccc(N)nc1 | 2{486} | Cn1c(Cl)nc(Cl)c1C=O       | 3{46} | CC(=C)C[N+]<br>#[C-]            | 11.1 | 10 |
| 929 | 4{112,487,61} | COC1=CN=CC2=NC(=C(NCCCNC(=O)OC(C)(C)C)N12)C1=C(Cl)C=NN1C<br> c:4,25,28,t:2,6,8                     | Z8873684760 | 1{112} | COc1cnc(N)n1          | 2{487} | Cn1nc(Cl)c1C=O            | 3{61} | CC(C)(C)OC(=O)NCCC[N+]<br>#[C-] | 11.0 | 9  |
| 930 | 4{400,488,15} | CCNC1=C(N=C2C=CC(COC(C)C)=CN12)C1=CC2=C(NC(=O)CC2)N=C1<br> c:7,14,29,t:3,5,19,21                   | Z8878918822 | 1{400} | CC(C)OCc1ccc(N)nc1    | 2{488} | O=Cc1cnc2N<br>C(=O)CCc2c1 | 3{15} | CC[N+]<br>#[C-]                 | 9.5  | 9  |
| 931 | 4{399,489,22} | CC(C)OC1=NN2C(NC3COC3)=C(N=C2C=C1)C1=NOC(=C1)C1CCC1<br> c:13,15,18,24,t:4,21                       | Z8854581166 | 1{399} | CC(C)Oc1ccc(N)nn1     | 2{489} | O=Cc1cc(on1)C2CCC2        | 3{22} | [C-]<br>#[N+]C1CO<br>C1         | 9.1  | 9  |

|     |               |                                                                                                      |             |        |                        |        |                              |       |                                  |      |   |
|-----|---------------|------------------------------------------------------------------------------------------------------|-------------|--------|------------------------|--------|------------------------------|-------|----------------------------------|------|---|
| 932 | 4{401,296,39} | CCOCCNC1=C(N=C2C=CC3=C(N=CC=C3C1)N12)C1=CN(CCF)N=C1<br> c:10,14,16,29,t:6,8,12,23                    | Z8873684628 | 1{401} | Nc1ccc2c(C)ccnc2n1     | 2{296} | FCCn1cc(C=O)en1              | 3{39} | CCOCC[N+]#[C-]                   | 9.9  | 9 |
| 933 | 4{83,490,18}  | CC(C)(C)NC1=C(N=C2C=CC(=CN12)P(C)(C)=O)C1=CC(OC(F)(F)CF)=CC=C1<br> c:9,11,28,30,t:5,7,20             | Z8878918343 | 1{83}  | CP(=O)(C)c1ccc(N)nc1   | 2{490} | FCC(F)(F)Oc1cccc(C=O)c1      | 3{18} | CC(C)(C)[N+]#[C-]                | 10.5 | 9 |
| 934 | 4{79,129,9}   | CNC1=C(N=C2C=NC=C(C)N12)C1=CC=CC2=NC=NN12  c:6,16,20,t:2,4,8,14,18                                   | Z8849597841 | 1{79}  | Cc1cnc(N)n1            | 2{129} | O=Cc1cccc2ncnn12             | 3{9}  | C[N+]#[C-]                       | 6.3  | 8 |
| 935 | 4{125,212,15} | CCNC1=C(N=C2C=CC(CCO)=CN12)C1=NO<br>C(=C1)C(F)F  c:7,12,20,t:3,5,17                                  | Z8808559873 | 1{125} | Nc1ccc(CC)Oen1         | 2{212} | FC(F)c1cc(C=O)no1            | 3{15} | CC[N+]#[C-]                      | 7.1  | 8 |
| 936 | 4{291,27,9}   | CNC1=C(N=C2N1C=C(C1)C=C2C1)C1=NN(C)C(C)=N1  c:4,11,20,t:2,8,15                                       | Z8878918327 | 1{291} | Nc1ncc(Cl)cc1Cl        | 2{27}  | Cc1nc(C=O)nn1C               | 3{9}  | C[N+]#[C-]                       | 6.5  | 8 |
| 937 | 4{402,491,49} | CC(C)(C)OC(=O)N1CCC2CC12CC1=C(NC2C(C(F)(F)C2)N2C(C=NC=C2F)=N1<br> c:16,28,30,33                      | Z8835022917 | 1{402} | Nc1cnc(F)n1            | 2{491} | CC(C)(C)OC(=O)N1CCC2CC21CC=O | 3{49} | FC1(F)CC(C1)[N+]#[C-]            | 8.8  | 7 |
| 938 | 4{216,190,10} | CC1=CC2=NC(C3=CC(=NN3)C3=NC=CC=C3)=C(NC3CCOC3)N2N=C1C<br> c:8,14,16,29,t:1,3,6,12,18                 | Z8801681808 | 1{216} | Cc1cc(N)nn1C           | 2{190} | O=Cc1cc(n[nH]1)c2ccccn2      | 3{10} | [C-]#[N+]C1CCOC1                 | 7.5  | 7 |
| 939 | 4{251,492,70} | CC1=NC(C)=C(C)N=C1C1=C(NC2CCN(C2)C(=O)OC(C)(C)C)N2C(C=CC3=C2NC(=O)C=C3)=N1  c:7,10,28,30,36,38,t:1,4 | Z8873684809 | 1{251} | Nc1ccc2ccc(=O)[nH]c2n1 | 2{492} | Cc1nc(C)c(C=O)nc1C           | 3{70} | CC(C)(C)OC(=O)N1CCC(C1)[N+]#[C-] | 8.9  | 7 |
| 940 | 4{240,277,22} | CC(C)(C)OC(=O)NC(CC1=C(NC2COC2)N2C=C(C=CC2=N1)C1=NNN=N1)C1CC1<br> c:10,19,21,24,30,t:27              | Z8878918548 | 1{240} | Nc1ccc(en1)c2nn[nH]n2  | 2{277} | CC(C)(C)OC(=O)NC(CC=O)C1CC1  | 3{22} | [C-]#[N+]C1CO C1                 | 8.7  | 7 |
| 941 | 4{73,493,13}  | COC1=CC=C(CNC2=C(N=C3C=CC4=NC=C4N23)C2=C(F)C=CC=N2)C=C1<br> c:12,16,23,26,28,31,t:2,4,8,10,14        | Z8878918871 | 1{73}  | Nc1ccc2nccn2n1         | 2{493} | Fe1cccnc1C=O                 | 3{13} | COc1ccc(C[N+]#[C-])cc1           | 6.6  | 6 |
| 942 | 4{92,310,18}  | CC(C)(C)NC1=C(N=C2C=C(C=CN12)C(N)=O)C1CCOC2(CCC2)C1  c:9,11,t:5,7                                    | Z8855619753 | 1{92}  | NC(=O)c1ccnc(N)c1      | 2{310} | O=CC1CCOC2(CCC2)C1           | 3{18} | CC(C)(C)[N+]#[C-]                | 6.0  | 6 |
| 943 | 4{158,448,31} | COC1=C2OCOC2=CC(=C1)C1=C(NCCSC)N2C=C(N=CC2=N1)P(C)(C)=O<br> c:2,8,10,13,21,23,26                     | Z8835022883 | 1{158} | CP(=O)(C)c1cnc(N)cn1   | 2{448} | COc1cc(C=O)cc2OCOC21         | 3{31} | CSCC[N+]#[C-]                    | 7.0  | 6 |

|     |               |                                                                                                             |             |        |                            |        |                                    |       |                                   |     |   |
|-----|---------------|-------------------------------------------------------------------------------------------------------------|-------------|--------|----------------------------|--------|------------------------------------|-------|-----------------------------------|-----|---|
| 944 | 4{330,250,1}  | CN(C)S(=O)(=O)C1=CN2C(C=C1)=NC(=C2N1)C1=CN(C)N=C1Br<br> c:10,12,14,26,t:6,22                                | Z8808559863 | 1{330} | CN(C)S(=O)(=O)c1ccc(N)nc1  | 2{250} | Cn1cc(C=O)c(Br)n1                  | 3{1}  | [C-]#[N+]C1CC1                    | 7.0 | 6 |
| 945 | 4{197,404,2}  | CC(C)CS(=O)(=O)C1=CN2C(C=C1)=NC(C1=NN=C(C)N1)=C2NC1=CC=C(F)C=C1<br> c:11,13,22,31,t:7,16,18,26,28           | Z8878918439 | 1{197} | CC(C)CS(=O)(=O)c1ccc(N)nc1 | 2{404} | Cc1nnc(C=O)[nH]1                   | 3{2}  | Fc1ccc([N+]#[C-])cc1              | 6.4 | 6 |
| 946 | 4{73,494,20}  | COC1=CC(C)=C(NC2=C(N=C3C=CC4=NC=CN4N23)C2=C(C1)N=CS2)C=C1<br> c:12,16,23,26,30,t:2,5,8,10,14                | Z8878918470 | 1{73}  | Nc1ccc2nccn2n1             | 2{494} | Clc1ncsc1C=O                       | 3{20} | COc1ccc([N+]#[C-])c(C)c1          | 5.6 | 5 |
| 947 | 4{28,11,26}   | FC1=CC=C(CNC2=C(N=C3C=C(C=CN23)C2=NOC=N2)C2=NN(CC(F)(F)F)C=C2)C=C1<br> c:11,13,21,32,35,t:1,3,7,9,18,24     | Z8873685392 | 1{28}  | Cl.Nc1cc(ccn1)c2ncon2      | 2{11}  | FC(F)(F)Cn1ccc(C=O)n1              | 3{26} | Fc1ccc(C[N+]#[C-])cc1             | 6.2 | 5 |
| 948 | 4{403,495,26} | COC(=O)C1=NN2C(C=C1)=NC(=C2NCC1=C(C=C(F)C=C1)C1=C(C1)C=CC=N1<br> c:8,10,12,22,25,28,30,t:4,17,19            | Z8778278034 | 1{403} | COC(=O)c1ccc(N)mn1         | 2{495} | Clc1cccnc1C=O                      | 3{26} | Fc1ccc(C[N+]#[C-])cc1             | 5.5 | 5 |
| 949 | 4{188,496,62} | COC(=O)C1=CC(=CC(=C1)[N+])([O-])=O)C1=C(NC2(CCCC2)C(=O)OC)N2C(C=N)C=C2C(=O)OC)=N1<br> c:6,8,14,29,31,37,t:4 | Z8854581134 | 1{188} | COC(=O)c1cnc(N)n1          | 2{496} | COC(=O)c1cc(C=O)cc(c1)[N+](=O)[O-] | 3{62} | COC(=O)C1(CCCC1)[N+]#[C-]         | 6.1 | 5 |
| 950 | 4{94,497,43}  | CCN1N=CC(C)=C1C1=C(NC2CCN(CC2)C(=O)OC(C)(C)C)N2N=C(F)C=CC2=N1<br> c:3,6,9,30,33,t:27                        | Z8878918795 | 1{94}  | Nc1ccc(F)n1                | 2{497} | CCn1ncc(C)c1C=O                    | 3{43} | CC(C)(C)OC(=O)N1CCC(CC1)[N+]#[C-] | 5.3 | 4 |
| 951 | 4{354,108,71} | COC(=O)C1=CN2C(C=C1)=NC(=C2NC1=CC(OC)=CC=C1)C1=CN=C(N=C1)N1CCOCC1<br> c:8,10,12,20,22,27,29,t:4,16,25       | Z8878918649 | 1{354} | COC(=O)c1ccc(N)nc1         | 2{108} | O=Cc1enc(nc1)N2CCOCC2              | 3{71} | COc1cccc([N+]#[C-])c1             | 5.5 | 4 |
| 952 | 4{267,498,23} | COC(=O)CCC(NC1=C(N=C2C=CC=C(C#C)N12)C1=C(Br)N=CS1)C(=O)OC<br> c:12,21,24,t:8,10,14                          | Z8854581160 | 1{267} | Nc1cccc(C#C)n1             | 2{498} | BrC1ncsc1C=O                       | 3{23} | COC(=O)CC(C[N+]#[C-])C(=O)OC      | 5.5 | 4 |
| 953 | 4{181,499,14} | COCCNC1=C(N=C2N1C=CC1=C2N=CC=N1)C1=C(OC)C(F)=C(I)C=C1<br> c:7,11,13,16,18,21,29,t:5,26                      | Z8878918786 | 1{181} | Nc1nccc2ncnc12             | 2{499} | COc1c(F)c(I)ccc1C=O                | 3{14} | COCC[N+]#[C-]                     | 5.5 | 4 |
| 954 | 4{251,500,62} | COC(=O)C1(CCCC1)NC1=C(N=C2C=CC3=C(NC(=O)C=C3)N12)C1=CN=CS1<br> c:15,22,30,t:11,13,17,28                     | Z8878918867 | 1{251} | Nc1ccc2ccc(=O)[nH]c2n1     | 2{500} | O=Cc1cnsc1                         | 3{62} | COC(=O)C1(CCCC1)[N+]#[C-]         | 4.3 | 4 |
| 955 | 4{223,501,34} | NC(=O)C1=NN2C(C=C1)=NC(=C2NCC1CCC(O)C1)C1=CC=C(C=C1)N1CCC1<br> c:7,9,11,24,26,t:3,22                        | Z8829498718 | 1{223} | NC(=O)c1ccc(N)mn1          | 2{501} | O=Cc1ccc(cc1)N2CCCC2               | 3{34} | [C-]#[N+]CC1CCC(O)1               | 3.9 | 4 |

|     |               |                                                                                                        |             |        |                            |        |                                   |       |                              |     |   |
|-----|---------------|--------------------------------------------------------------------------------------------------------|-------------|--------|----------------------------|--------|-----------------------------------|-------|------------------------------|-----|---|
| 956 | 4{194,502,49} | FC1(F)CC(C1)NC1=C(N=C2N1C=CN=C2N1C=CC=N1)C1=CC=C(C=C1)C1=CN=C1<br> c:10,14,16,20,22,27,29,35,t:8,25,32 | Z8855739082 | 1{194} | Nc1ncnc1n2cccn2            | 2{502} | Cl.O=Cc1ccc(cc1)c2cn[nH]c2        | 3{49} | FC1(F)CC(C1)[N+]#[C-]        | 4.3 | 4 |
| 957 | 4{181,503,14} | COCCNC1=C(N=C2N1C=CC1=C2N=CC=N1)C1=CSC(Br)=N1<br> c:7,11,13,16,18,25,t:5,21                            | Z8878918553 | 1{181} | Nc1nccc2ncnc12             | 2{503} | BrC1nc(C=O)cs1                    | 3{14} | COCC[N+]#[C-]                | 3.9 | 4 |
| 958 | 4{83,504,31}  | CSCCNC1=C(N=C2C=CC(=CN12)P(C)(C)=O)C1=C(F)C(F)=C(Br)C=C1<br> c:9,11,20,27,t:5,7,24                     | Z8878918772 | 1{83}  | CP(=O)(C)c1ccc(N)nc1       | 2{504} | Fc1c(F)c(C=O)ccc1Br               | 3{31} | CSCC[N+]#[C-]                | 4.5 | 4 |
| 959 | 4{73,137,11}  | CC1=C(C(C)=NO1)C1=C(NCC2=CC(Br)=CC=C2)N2N3C=CN=C3C=CC2=N1<br> c:4,8,15,17,22,24,27,30,t:1,12           | Z8878918842 | 1{73}  | Nc1ccc2ncn2n1              | 2{137} | Cc1noc(C)c1C=O                    | 3{11} | Br1cccc(C[N+]#[C-])c1        | 4.1 | 4 |
| 960 | 4{22,207,9}   | CNC1=C(N=C2C=CC(Cl)=NN12)C1=CC(=N1)C(=O)OC<br> c:6,9,16,t:2,4,14                                       | Z8846491866 | 1{22}  | Nc1ccc(Cl)nn1              | 2{207} | COC(=O)c1cc(C=O)n(C)n1            | 3{9}  | C[N+]#[C-]                   | 3.0 | 3 |
| 961 | 4{389,505,23} | COC(=O)CCC(NC1=C(N=C2N1C=C(C)C=C2)C1=CC=CN2N=CC=C12)C(=O)OC<br> c:10,17,23,26,t:8,14,21,28             | Z8878918448 | 1{389} | Cc1nc(N)c(C)c1             | 2{505} | O=Cc1cccn2nccc12                  | 3{23} | COC(=O)CC(C[N+]#[C-])C(=O)OC | 3.6 | 3 |
| 962 | 4{329,50,18}  | COC1=CC=C(C)C2=NC([C@@H]3C[C@H]3C3OCCO3)=C(NC(C)(C)C)N12<br> &1:10,12,r,t:2,4,7,19                     | Z8873684730 | 1{329} | Cl.COc1ccc(C)c(N)n1        | 2{50}  | O=C[C@@H]1C[C@H]1C2OCCO2 &1:2,4,r | 3{18} | CC(C)(C)[N+]#[C-]            | 2.6 | 3 |
| 963 | 4{158,506,18} | CC(C)(C)NC1=C(N=C2C=NC(=CN12)P(C)(C)=O)C1=CC2=C(C=C1)N=CC(Br)=C2<br> c:9,11,22,24,27,30,t:5,7,20       | Z8855739253 | 1{158} | CP(=O)(C)c1cnc(N)en1       | 2{506} | Br1enc2ccc(C=O)cc2c1              | 3{18} | CC(C)(C)[N+]#[C-]            | 3.4 | 3 |
| 964 | 4{193,319,10} | CNC(=O)C1=CN2C(NC3CCOC3)=C(N=C2C=C1)C1=C(C)C=C(OCC#N)C=C1<br> c:14,16,19,22,31,t:4,25                  | Z8878918349 | 1{193} | CNC(=O)c1ccc(N)nc1         | 2{319} | Cc1cc(OCC#N)ccc1C=O               | 3{10} | [C-]#[N+]C1CCOC1             | 2.8 | 3 |
| 965 | 4{288,148,39} | CCOCCNC1=C(N=C2C=C(NC(=O)OC(C)(C)C)C=CN12)C1=C(OC)N(C)N=C1C<br> c:20,25,31,t:6,8,10                    | Z8810903014 | 1{288} | CC(C)(C)OC(=O)Nc1ccnc(N)c1 | 2{148} | COc1c(C=O)c(C)nn1C                | 3{39} | CCOCC[N+]#[C-]               | 3.0 | 2 |
| 966 | 4{404,110,29} | CCOC(=O)CCNC1=C(N=C2C=CC=C(OC(C)CC)N12)C1=CN=C(C=C1)P(C)(C)=O<br> c:12,26,28,t:8,10,14,24              | Z8878918631 | 1{404} | CCC(C)Oc1cccc(N)n1         | 2{110} | CP(=O)(C)c1ccc(C=O)cn1            | 3{29} | CCOC(=O)C[N+]#[C-]           | 3.0 | 2 |
| 967 | 4{334,363,11} | CC1=NC(=CN1)C1=C(NCC2=CC(Br)=CC=C2)N2C=C3COCCC3=C(C#N)C2=N1<br> c:3,7,14,16,32,t:1,11,20,27            | Z8837933173 | 1{334} | Nc1ncc2COCCc2c1C#N         | 2{363} | Cc1nc(C=O)c[nH]1                  | 3{11} | Br1cccc(C[N+]#[C-])c1        | 2.2 | 2 |

|     |               |                                                                                               |             |        |                           |        |                        |       |                                  |     |   |
|-----|---------------|-----------------------------------------------------------------------------------------------|-------------|--------|---------------------------|--------|------------------------|-------|----------------------------------|-----|---|
| 968 | 4{227,135,47} | CC(C)NC1=C(N=C2C=NC(Br)=C(Cl)N12)C1=C(C)N(C)N=C1C  c:8,17,22,t:4,6,11                         | Z8810903047 | 1{227} | Nc1enc(Br)c(Cl)n1         | 2{135} | Cc1nm(C)c(C)c1C=O      | 3{47} | CC(C)[N+]#[C-]                   | 1.4 | 1 |
| 969 | 4{19,227,37}  | COC(=O)C1CC(C1)NC1=C(N=C2N1C=CC=C2C#N)C1=NC=CS1  c:12,16,18,25,t:10,23                        | Z8878918900 | 1{19}  | Nc1ncccc1C#N              | 2{227} | O=Cc1nccs1             | 3{37} | COC(=O)C1CC(C1)[N+]#[C-]         | 0.0 | 0 |
| 970 | 4{376,507,12} | COC1=NC(Cl)=CN2C(NCC3CCOC3)=C(N=C12)C1=CC2=CN=CN2C=C1  c:5,16,26,30,t:2,18,22,24              | Z8878918603 | 1{376} | COc1nc(Cl)cnc1N           | 2{507} | O=Cc1ccn2cncc2c1       | 3{12} | [C-]#[N+]CC1COC1                 | 0.0 | 0 |
| 971 | 4{366,507,12} | COC1=CC=CN2C(NCC3CCOC3)=C(N=C12)C1=CC2=CN=CN2C=C1  c:4,15,25,29,t:2,17,21,23                  | Z8878918592 | 1{366} | COc1ccnc1N                | 2{507} | O=Cc1ccn2cncc2c1       | 3{12} | [C-]#[N+]CC1COC1                 | 0.0 | 0 |
| 972 | 4{181,508,14} | COCCNC1=C(N=C2N1C=CC1=C2N=CC=N1)C1=CC=C(CN2CCOCC2)C=C1  c:7,11,13,16,18,33,t:5,21,23          | Z8878918550 | 1{181} | Nc1nccc2nccnc12           | 2{508} | O=Cc1ccc(CN2CCOCC2)cc1 | 3{14} | COCC[N+]#[C-]                    | 0.0 | 0 |
| 973 | 4{197,509,2}  | CC(C)CS(=O)(=O)C1=CN2C(C=C1)=NC(=C2)NC1=CC=C(F)C=C1)C1=NN=CN1C  c:11,13,15,24,29,t:7,19,21,27 | Z8878918495 | 1{197} | CC(C)CS(=O)(=O)c1ccc(N)n1 | 2{509} | Cn1cnnc1C=O            | 3{2}  | Fc1ccc([N+]#[C-])cc1             | 0.0 | 0 |
| 974 | 4{179,424,23} | COC(=O)CCC(NC1=C(N=C2C=C(OC)C=CN12)C1=NN(C)C(=N1)C(F)(F)C(=O)OC  c:16,25,t:8,10,12,21         | Z8878918337 | 1{179} | COc1ccnc(N)c1             | 2{424} | Cn1nc(C=O)nc1C(F)(F)F  | 3{23} | COC(=O)CC([N+]#[C-])C(=O)OC      | 0.0 | 0 |
| 975 | 4{389,510,23} | COC(=O)CCC(NC1=C(N=C2N1C=C(C)C=C2)C1=C(C)SC2=CN=CN12)C(=O)OC  c:10,17,21,27,t:8,14,25         | Z8878918322 | 1{389} | Cc1enc(N)c(C)c1           | 2{510} | Cc1sc2cnnc2c1C=O       | 3{23} | COC(=O)CC([N+]#[C-])C(=O)OC      | 0.0 | 0 |
| 976 | 4{179,81,23}  | COC(=O)CCC(NC1=C(N=C2C=C(OC)C=CN12)C1=NC(=CC=C1)C(F)F)C(=O)OC  c:16,23,25,t:8,10,12,21        | Z8873684674 | 1{179} | COc1ccnc(N)c1             | 2{81}  | FC(F)c1cccc(C=O)n1     | 3{23} | COC(=O)CC([N+]#[C-])C(=O)OC      | 0.0 | 0 |
| 977 | 4{213,191,31} | CCN1C=NN=C1C1=C(NCCSC)N2C(=N1)C(F)=CC=C2OC  c:3,5,8,16,20,22                                  | Z8873685469 | 1{213} | COc1ccc(F)c(N)n1          | 2{191} | CCn1cnnc1C=O           | 3{31} | CSCC[N+]#[C-]                    | 0.0 | 0 |
| 978 | 4{405,511,1}  | CC(NC(=O)OC(C)C)C1=C(NC2CC2)N2C=C(C=CC2=N1)N1CCCC1=O  c:10,18,20,23                           | Z8829498661 | 1{405} | Nc1ccc(en1)N2CCCC2=O      | 2{511} | CC(NC(=O)OC(C)C)C=O    | 3{1}  | [C-]#[N+]C1CC1                   | 0.0 | 0 |
| 979 | 4{221,512,14} | COCCNC1=C(N=C2N1C(C)=CC=C2C#N)C1=NC=C(CN(C)C)S1  c:7,12,14,t:5,19,21                          | Z8829498460 | 1{221} | Cc1ccc(C#N)c(N)n1         | 2{512} | CN(C)Cc1ncc(C=O)s1     | 3{14} | COCC[N+]#[C-]                    | 0.0 | 0 |
| 980 | 4{251,324,70} | CC(C)(C)OC(=O)N1CCC(C1)NC1=C(N=C2C=CC3=C(NC(=O)C=C3)N12)C1CC2(C1)CCO2  c:18,25,t:14,16,20     | Z8854581157 | 1{251} | Nc1ccc2ccc(=O)[nH]c2n1    | 2{324} | O=CC1CC2(C1)CCCO2      | 3{70} | CC(C)(C)OC(=O)N1CCC(C1)[N+]#[C-] | 0.0 | 0 |



|     |               |                                                                                                     |             |        |                               |        |                         |       |                                    |     |   |
|-----|---------------|-----------------------------------------------------------------------------------------------------|-------------|--------|-------------------------------|--------|-------------------------|-------|------------------------------------|-----|---|
| 981 | 4{198,464,14} | COCCNC1=C(N=C2C=NC(C#C)=C(Cl)N12)C1=CC2=C(C=CC=C2)N2N=NN=C12<br> c:9,23,25,29,t:5,7,13,19,21,31     | Z8835022894 | 1{198} | Ne1cnc(C#C)c(Cl)n1            | 2{464} | O=Cc1cc2ccc2n3nnnc13    | 3{14} | COCC[N+][#][C-]                    | 0.0 | 0 |
| 982 | 4{406,356,31} | CSCCNC1=C(N=C2C=CC=C(N12)C1=NN=N1)C1=CN(CC(C)C)N=N1<br> c:9,11,19,29,t:5,7,16,22                    | Z8855739251 | 1{406} | Ne1cccc(n1)c2nn[nH]n2         | 2{356} | CC(C)Cn1cc(C=O)nn1      | 3{31} | CSCC[N+][#][C-]                    | 0.0 | 0 |
| 983 | 4{113,278,6}  | CCOC(=O)CCNC1=C(N=C2N1C=CC=C2N1CCOCC1)C1=C(Br)N=NN1C<br> c:11,15,17,27,30,t:9                       | Z8803896969 | 1{113} | Ne1ncccc1N2CCOCC2             | 2{278} | Cn1nnc(Br)c1C=O         | 3{6}  | CCOC(=O)C<br>CC[N+][#][C-]         | 0.0 | 0 |
| 984 | 4{318,273,12} | COC(=O)C1=CN2C(NCC3CCOC3)=C(N=C2C(OC)=N1)C1=C(Br)N(C)N=C1C<br> c:15,17,22,25,30,t:4                 | Z8798985049 | 1{318} | COC(=O)c1cnc(N)c(OC)n1        | 2{273} | Cc1nn(C)c(Br)c1C=O      | 3{12} | [C-]<br>][N+]CC1C<br>COC1          | 0.0 | 0 |
| 985 | 4{340,513,23} | CCOC1=CC=CN2C(NC(CCC(=O)OC)C(=O)OC)=C(N=C12)C1=C(F)C=NC(F)=C1<br> c:5,20,26,29,32,t:3,22            | Z8846492252 | 1{340} | CCOC1cccn1N                   | 2{513} | Fc1cc(C=O)c(F)en1       | 3{23} | COC(=O)CC<br>C([N+][#][C-])C(=O)OC | 0.0 | 0 |
| 986 | 4{179,445,23} | COC(=O)CCC(NC1=C(N=C2C=C(OC)C=CN12)C1=NOC(=C1)C(C)C(C)C(=O)OC<br> c:16,24,t:8,10,12,21              | Z8846491733 | 1{179} | COc1ccnc(N)c1                 | 2{445} | CC(C)(C)c1cc(C=O)no1    | 3{23} | COC(=O)CC<br>C([N+][#][C-])C(=O)OC | 0.0 | 0 |
| 987 | 4{211,47,41}  | COC1=CC=C(NC2=C(CCOCC=C)N=C3N2C=CC=C3C2=NN=NN2)C=C1<br> c:7,15,19,21,26,30,t:2,4,24                 | Z8837933183 | 1{211} | Ne1ncccc1c2nnn[nH]2           | 2{47}  | C=CCOCCC=O              | 3{41} | COc1ccc([N+][#][C-])cc1            | 0.0 | 0 |
| 988 | 4{262,139,12} | CC(=O)NC1=CN2C(C=C1)=NC(=C2NCC1CCOC1)C1=C(C)N(CCO)N=C1C<br> c:8,10,12,23,30,t:4                     | Z8837933180 | 1{262} | CC(=O)Ne1ccc(N)nc1            | 2{139} | Cc1nn(CCO)c(C)c1C=O     | 3{12} | [C-]<br>][N+]CC1C<br>COC1          | 0.0 | 0 |
| 989 | 4{312,514,12} | O=C1NC(=O)C2=C(N1)N1C(C=C2)=NC(=C1NCC1CCOC1)C1=CC2=C3N(CCCC3=C1)CC2<br> c:5,11,13,15,35,t:26,28     | Z8837933160 | 1{312} | Ne1ccc2c(=O)[nH]c(=O)[nH]c2n1 | 2{514} | O=Cc1cc2CCN3CCCc(c1)c32 | 3{12} | [C-]<br>][N+]CC1C<br>COC1          | 0.0 | 0 |
| 990 | 4{407,435,12} | CCCOC1=NC=CN2C(NCC3CCOC3)=C(N=C12)C1=CC(=NO)C(=O)OCC<br> c:6,17,25,t:4,19,23                        | Z8837933152 | 1{407} | CCCOc1nccnc1N                 | 2{435} | CCOC(=O)c1cc(C=O)on1    | 3{12} | [C-]<br>][N+]CC1C<br>COC1          | 0.0 | 0 |
| 991 | 4{144,515,53} | CNS(=O)(=O)C1=CN2C(NCCOCC3=CC=CC=C3)=C(N=C2C=C1)C1=NOC(CN(C)C)=C1<br> c:16,18,20,22,25,35,t:5,14,28 | Z8837933145 | 1{144} | CNS(=O)(=O)c1ccc(N)nc1        | 2{515} | CN(C)Cc1cc(C=O)no1      | 3{53} | [C-]<br>][N+]CCOC<br>c1cccc1       | 0.0 | 0 |
| 992 | 4{5,26,17}    | C(NC1=C(CCC2=CC=CC=C2)N=C2NN=NN12)C1CCOCC1  c:2,8,10,16,t:6,13                                      | Z8711892497 | 1{5}   | Ne1nnn[nH]1                   | 2{26}  | O=CCCc1ccc1             | 3{17} | [C-]<br>][N+]CC1C<br>COCC1         | 0.0 | 0 |

|      |               |                                                                                                           |             |        |                        |        |                        |       |                           |     |   |
|------|---------------|-----------------------------------------------------------------------------------------------------------|-------------|--------|------------------------|--------|------------------------|-------|---------------------------|-----|---|
| 993  | 4{408,516,10} | COC1=C(Br)C=CC2=NC(=C(NC3CCOC3)N12)C1=NN(C)C(=N1)C1CC1  c:2,5,25,t:7,9,21                                 | Z8878918788 | 1{408} | COc1nc(N)ccc1Br        | 2{516} | Cn1nc(C=O)nc1C2CC2     | 3{10} | [C-]#[N+]C1CCOC1          | 0.0 | 0 |
| 994  | 4{409,517,38} | CN1C=NN=C1C1=CC2=NC(C3=CC(=CS3)S(N)(=O)=O)=C(NC3=CC4=C(OCO4)C=C3)N2C=C1  c:2,4,14,32,37,t:7,9,12,21,24,26 | Z8878918632 | 1{409} | Cn1cnn1c2ccnc(N)c2     | 2{517} | NS(=O)(=O)c1csc(C=O)c1 | 3{38} | [C-]#[N+]c1ccc2OCOc2c1    | 0.0 | 0 |
| 995  | 4{410,518,62} | COC(=O)C1(CCCC1)NC1=C(N=C2C=CC3=C(N=CC(Cl)=C3)N12)C1=C(C)N=CN1  c:15,19,22,28,31,t:11,13,17               | Z8878918579 | 1{410} | Nc1ccc2cc(Cl)nc2n1     | 2{518} | Cc1nc[nH]c1C=O         | 3{62} | COC(=O)C1(CCCC1)[N+]#[C-] | 0.0 | 0 |
| 996  | 4{408,519,12} | COC1=C(Br)C=CC2=NC(=C(NCC3CCOC3)N12)C1=CN=C(S1)C(F)F  c:2,5,24,t:7,9,22                                   | Z8878918551 | 1{408} | COc1nc(N)ccc1Br        | 2{519} | FC(F)c1ncc(C=O)s1      | 3{12} | [C-]#[N+]CC1CCOC1         | 0.0 | 0 |
| 997  | 4{251,271,71} | COC1=CC(NC2=C(N=C3C=CC4=C(NC(=O)C=C4)N23)C2=NN(C)N=N2)=CC=C1  c:10,17,27,29,31,t:2,6,8,12,23              | Z8878918383 | 1{251} | Nc1ccc2ccc(=O)[nH]c2n1 | 2{271} | Cn1nnc(C=O)n1          | 3{71} | COc1cccc([N+]#[C-])c1     | 0.0 | 0 |
| 998  | 4{411,103,37} | COC(=O)C1CC(C1)NC1=C(N=C2C=C(Br)C=C(F)N12)C1CCC2(COC2)OC1  t:10,12,14,17                                  | Z8873684672 | 1{411} | Nc1cc(Br)cc(F)n1       | 2{103} | O=CC1CCC2(COC2)OC1     | 3{37} | COC(=O)C1CC(C1)[N+]#[C-]  | 0.0 | 0 |
| 999  | 4{412,520,10} | COC1=C(C=NN=C1)C1=C(NC2CCOC2)N2C=C(Br)C(CO)=CC2=N1  c:4,6,9,24,27,t:2,19                                  | Z8873684643 | 1{412} | Nc1cc(CO)cc(Br)n1      | 2{520} | COc1cnncc1C=O          | 3{10} | [C-]#[N+]C1CCOC1          | 0.0 | 0 |
| 1000 | 4{340,478,5}  | CCOC1=CC=CN2C(NCCCOC)=C(N=C12)C1=CN(C)C(=O)C2=C1C=CN=C2  c:5,14,26,29,31,t:3,16,20                        | Z8873685464 | 1{340} | CCOc1cccn1N            | 2{478} | Cn1cc(C=O)c2ccncc2c1=O | 3{5}  | COCCC[N+]#[C-]            | 0.0 | 0 |
| 1001 | 4{413,521,22} | FC(F)(F)C1=CC2=NC(=C(NC3COC3)N2N=C1)C1=C(Br)C=NC(Br)=C1  c:18,21,24,27,t:4,6,8                            | Z8873685394 | 1{413} | Nc1cc(cnn1)C(F)(F)F    | 2{521} | Brcc1cc(C=O)c(Br)n1    | 3{22} | [C-]#[N+]C1COC1           | 0.0 | 0 |
| 1002 | 4{329,191,7}  | CCN1C=NN=C1C1=C(NC2CCOCC2)N2C(=N1)C(C)=CC=C2OC  c:3,5,8,19,23,25                                          | Z8873685376 | 1{329} | Cl.COc1ccc(C)c(N)n1    | 2{191} | CCn1cnn1C=O            | 3{7}  | [C-]#[N+]C1CCOCC1         | 0.0 | 0 |
| 1003 | 4{37,520,24}  | COC1=CC(CNC2=C(N=C3C=CC=C(C(F)F)N23)C2=C(OC)C=NN=C2)=CC=C1  c:11,21,25,27,29,31,t:2,7,9,13                | Z8873684890 | 1{37}  | Cl.Nc1cccc(n1)C(F)F    | 2{520} | COc1cnncc1C=O          | 3{24} | COc1cccc(C[N+]#[C-])c1    | 0.0 | 0 |
| 1004 | 4{48,173,15}  | CCNC1=C(N=C2C=C(C=CN12)S(C)(=O)=O)C1=NC(=NN1C)C(F)(F)F  c:7,9,20,t:3,5,18                                 | Z8873684636 | 1{48}  | CS(=O)(=O)c1cnc(N)c1   | 2{173} | Cn1nc(nc1C=O)C(F)(F)F  | 3{15} | CC[N+]#[C-]               | 0.0 | 0 |

|      |               |                                                                                                         |             |        |                                |        |                                          |       |                                               |     |   |
|------|---------------|---------------------------------------------------------------------------------------------------------|-------------|--------|--------------------------------|--------|------------------------------------------|-------|-----------------------------------------------|-----|---|
| 1005 | 4{348,404,2}  | CC1=NN=C(N1)C1=C(NC2=CC=C(F)C=C2)N2C=C(F)N=CC2=N1<br> c:3,7,15,22,25,t:1,10,12,19                       | Z8873684580 | 1{348} | Nc1cnc(F)c<br>n1               | 2{404} | Cc1mnc(C=O)<br>[nH]1                     | 3{2}  | Fe1ccc([N+]<br>#[C-])cc1                      | 0.0 | 0 |
| 1006 | 4{251,522,70} | COC1=C(C=C(C)C=N1)C1=C(NC2CCN(C2)C(=O)OC(C)(C)C)N2C(C=CC3=C2NC(=O)C=C3)=N1  c:7,10,28,30,36,38,t:2,4    | Z8873684826 | 1{251} | Nc1ccc2ccc<br>(=O)[nH]c2<br>n1 | 2{522} | COc1ncc(C)c<br>c1C=O                     | 3{70} | CC(C)(C)OC<br>(=O)N1CCCC<br>(C1)[N+]#[C-<br>] | 0.0 | 0 |
| 1007 | 4{169,523,13} | CNC(=O)C1=NN2C(C=C1)=NC(=C2NCC1=C<br>C=C(OC)C=C1)C1=C(F)C(OC)=CC=C1<br> c:8,10,12,23,26,31,33,t:4,17,19 | Z8829498665 | 1{169} | CNC(=O)c1<br>ccc(N)nn1         | 2{523} | COc1cccc(C<br>=O)c1F                     | 3{13} | COc1ccc(C[<br>N+]#[C-])cc1                    | 0.0 | 0 |
| 1008 | 4{378,524,12} | FC1=NC(F)=C(F)C(=C1)C1=C(NCC2CCOC2)<br>N2C=CC=C(OCC3=CN=CC=C3)C2=N1<br> c:7,10,21,29,31,35,t:1,4,23,27  | Z8829498545 | 1{378} | Nc1ncccc1<br>OCc2ccnc<br>2     | 2{524} | Fe1cc(C=O)c<br>(F)c(F)n1                 | 3{12} | [C-<br>]#[N+]CC1C<br>COC1                     | 0.0 | 0 |
| 1009 | 4{223,382,50} | COC(C)(C)CC1=C(NC2=CC3=C(OCCO3)C=C2)N2N=C(C=CC2=N1)C(N)=O<br> c:6,18,22,24,27,t:9,11                    | Z8829498488 | 1{223} | NC(=O)c1c<br>cc(N)nn1          | 2{382} | COC(C)(C)C<br>C=O                        | 3{50} | [C-<br>]#[N+]c1ccc<br>2OCCOc2c1               | 0.0 | 0 |
| 1010 | 4{223,525,66} | CC(NC1=C(N=C2C=CC(=NN12)C(N)=O)C1=C<br>(Br)C=NC=C1F)C1=CC=CC=C1<br> c:7,9,17,20,22,28,30,t:3,5,26       | Z8835022910 | 1{223} | NC(=O)c1c<br>cc(N)nn1          | 2{525} | Fe1cncc(Br)c<br>1C=O                     | 3{66} | CC([N+]#[C-<br>)c1cccc1                       | 0.0 | 0 |
| 1011 | 4{69,526,21}  | CNC(=O)C1=CC2=NC(=C(NCC3CC3)N2C=C1)<br>C1=CN2N=CC(C(N)=O)=C2N=C1<br> c:18,24,29,32,t:4,6,8,21           | Z8835022893 | 1{69}  | CNC(=O)c1<br>ccnc(N)c1         | 2{526} | NC(=O)c1en<br>n2cc(C=O)en<br>c12         | 3{21} | [C-<br>]#[N+]CC1C<br>C1                       | 0.0 | 0 |
| 1012 | 4{231,408,33} | COC1=C(CNC2=C(CCN3CCOC3=O)N=C3C=CC(=NN23)C(F)(F)F)C=CC=C1<br> c:2,6,19,21,30,32,t:17                    | Z8855739158 | 1{231} | Nc1ccc(nn1)<br>C(F)(F)F        | 2{408} | O=CCCN1C<br>COC1=O                       | 3{33} | COc1cccc1<br>C[N+]#[C-]                       | 0.0 | 0 |
| 1013 | 4{158,527,7}  | CC(C)(C)OC(=O)N1CC[C@@H](CC2=C(NC3CCOCC3)N3C=C(N=CC3=N2)P(C)(C)=O)C1<br> c:12,23,25,28                  | Z8846492320 | 1{158} | CP(=O)(C)c<br>1cnc(N)en1       | 2{527} | CC(C)(C)OC<br>(=O)N1CC[C<br>@@H](CC=O)C1 | 3{7}  | [C-<br>]#[N+]C1CC<br>OCC1                     | 0.0 | 0 |
| 1014 | 4{383,528,1}  | CN1N=C(C)C(Cl)=C1C1=C(NC2CC2)N2N=C<br>(C=CC2=N1)C1=NC=CC=C1<br> c:6,9,17,19,22,27,29,t:2,25             | Z8837933181 | 1{383} | Nc1ccc(nn1)<br>c2cccn2         | 2{528} | Cc1m(C)c(C<br>=O)c1Cl                    | 3{1}  | [C-<br>]#[N+]C1CC<br>1                        | 0.0 | 0 |
| 1015 | 4{399,477,22} | CC(C)OC1=NN2C(C=C1)=NC(C(NC(=O)OC(C)(C)C)C1COC1)=C2NC1COC1  c:8,10,26,t:4                               | Z8837933163 | 1{399} | CC(C)Oc1c<br>cc(N)nn1          | 2{477} | CC(C)(C)OC<br>(=O)NC(C=O)C1COC1          | 3{22} | [C-<br>]#[N+]C1CO<br>C1                       | 0.0 | 0 |

|      |               |                                                                                                     |             |        |                        |        |                          |       |                                           |     |   |
|------|---------------|-----------------------------------------------------------------------------------------------------|-------------|--------|------------------------|--------|--------------------------|-------|-------------------------------------------|-----|---|
| 1016 | 4{2,15,54}    | COC1=CC=C(C=C1)C1=C(NC2=CC=CC=C2)N2OC=CC2=N1  c:4,6,9,14,16,21,24,t:2,12                            | Z8711891895 | 1{2}   | Nc1cccon1              | 2{15}  | COc1ccc(C=O)cc1          | 3{54} | [C-]<br>#[N+]c1cccc1                      | 0.0 | 0 |
| 1017 | 4{181,529,6}  | CCOC(=O)CCCN1=C(N=C2N1C=CC1=C2N=CC=N1)C1=CC(CI)=C(C=C1)S(N)(=O)=O  c:11,15,17,20,22,28,30,t:9,25    | Z8878918889 | 1{181} | Nc1nccc2ncenc12        | 2{529} | NS(=O)(=O)c1ccc(C=O)c1Cl | 3{6}  | CCOC(=O)C<br>CC[N+]#[C-]                  | 0.0 | 0 |
| 1018 | 4{414,281,48} | COC(=O)C1=NN=C(C=C1)C1=C(NC2CCCN(C2)C(=O)OC(C)(C)C)N2C=C(CI)N=CC2=N1  c:6,8,11,32,35,t:4,29         | Z8878918817 | 1{414} | Nc1enc(Cl)en1          | 2{281} | COC(=O)c1ccc(C=O)nn1     | 3{48} | CC(C)(C)OC<br>(=O)N1CCC<br>C(C1)[N+]#[C-] | 0.0 | 0 |
| 1019 | 4{388,530,39} | CCOCCN1=C(N=C2C=C3CCOC3=CN12)C1CC2(CC(C2)OC)C1  c:17,t:6,8,10                                       | Z8878918764 | 1{388} | Cl.Nc1cc2C<br>CCOc2en1 | 2{530} | COC1CC2(C1)CC(C2)C=O     | 3{39} | CCOCC[N+]#<br>[C-]                        | 0.0 | 0 |
| 1020 | 4{415,531,10} | CC1=NC=C(C=N1)C1=C(NC2CCOC2)N2C(=N1)C(CCl)=CC=C2Br  c:3,5,8,18,23,25,t:1                            | Z8878918581 | 1{415} | Cl.Nc1nc(Br)ccc1CC1    | 2{531} | Cc1ncc(C=O)en1           | 3{10} | [C-]<br>#[N+]C1CC<br>OC1                  | 0.0 | 0 |
| 1021 | 4{416,532,23} | COC(=O)CCC(NC1=C(N=C2C=C(CCl)C=CN12)C1=C(OC)C(OC)=NC=N1)C(=O)OC  c:16,21,27,29,t:8,10,12            | Z8873684772 | 1{416} | Cl.Nc1cc(CCl)ccn1      | 2{532} | COc1ncc(C=O)c1OC         | 3{23} | COC(=O)CC<br>C([N+]#[C-])<br>C(=O)OC      | 0.0 | 0 |
| 1022 | 4{83,464,7}   | CP(C)(=O)C1=CN2C(C=C1)=NC(=C2NC1CCOCC1)C1=CC2=C(C=CC=C2)N2N=NN=C12  c:8,10,12,27,29,33,t:4,23,25,35 | Z8873684678 | 1{83}  | CP(=O)(C)c1ccc(N)nc1   | 2{464} | O=Cc1cc2ccc2n3nnc13      | 3{7}  | [C-]<br>#[N+]C1CC<br>OCC1                 | 0.0 | 0 |
| 1023 | 4{409,533,38} | CCC1=CC(=NO1)C1=C(NC2=CC3=C(OCO3)C=C2)N2C=CC(=CC2=N1)C1=NN=CN1C  c:4,8,19,23,25,28,33,t:2,11,13,31  | Z8873685397 | 1{409} | Cn1ennc1c2cenc(N)c2    | 2{533} | CCc1cc(C=O)no1           | 3{38} | [C-]<br>#[N+]c1cccc<br>2OCOc2c1           | 0.0 | 0 |
| 1024 | 4{329,534,7}  | COC1=CC=C(C)C2=NC(C3=NN(C=C3)C(C)C)=C(NC3CCOCC3)N12  c:13,t:2,4,7,10,18                             | Z8873685344 | 1{329} | Cl.COc1ccc(C)c(N)n1    | 2{534} | CC(C)n1ccc(C=O)n1        | 3{7}  | [C-]<br>#[N+]C1CC<br>OCC1                 | 0.0 | 0 |
| 1025 | 4{179,535,5}  | COCCCN1=C(N=C2C=C(OC)C=CN12)C1=NOC(=C1)C(C)C)O  c:14,22,t:6,8,10,19                                 | Z8873685310 | 1{179} | COc1cenc(N)c1          | 2{535} | CC(C)(O)c1ccc(C=O)no1    | 3{5}  | COCCC[N+]#<br>[C-]                        | 0.0 | 0 |
| 1026 | 4{89,271,71}  | COC1=CC(NC2=C(N=C3C=CC4=C(NN=C4)N23)C2=NN(C)N=N2)=CC=C1  c:10,15,25,27,29,t:2,6,8,12,21             | Z8873684617 | 1{89}  | Nc1ccc2cn[nH]c2n1      | 2{271} | Cn1nnc(C=O)n1            | 3{71} | COc1cccc([N+]#<br>[C-])c1                 | 0.0 | 0 |
| 1027 | 4{408,536,12} | COC1=C(Br)C=CC2=NC(C3=CN=C(O3)C3COCC3)=C(NCC3CCOC3)N12  c:2,5,12,t:7,10,22                          | Z8873684800 | 1{408} | COc1nc(N)ccc1Br        | 2{536} | O=Cc1enc(o1)C2CCOCC2     | 3{12} | [C-]<br>#[N+]CC1C<br>COC1                 | 0.0 | 0 |

|      |               |                                                                                                          |             |        |                               |        |                                       |       |                              |     |   |
|------|---------------|----------------------------------------------------------------------------------------------------------|-------------|--------|-------------------------------|--------|---------------------------------------|-------|------------------------------|-----|---|
| 1028 | 4{68,537,1}   | COC(=O)C1=CN=C(C=C1)C1=C(NC2CC2)N2C=CC(=CC2=N1)C#C  c:6,8,11,19,21,24,t:4                                | Z8829498778 | 1{68}  | Nc1cc(C#C)ccn1                | 2{537} | COC(=O)c1ccc(C=O)nc1                  | 3{1}  | [C-]#[N+]C1CC1               | 0.0 | 0 |
| 1029 | 4{151,17,9}   | CCOC1=CN=C(N=C1)C1=C(NC)N2C(C=NC=C2C1)=N1  c:5,7,10,16,18,21,t:3                                         | Z8829498592 | 1{151} | Nc1cnc(C1)n1                  | 2{17}  | CCOc1cnc(C=O)nc1                      | 3{9}  | C[N+]#[C-]                   | 0.0 | 0 |
| 1030 | 4{181,538,11} | CN1C=NC=C1C1=C(NCC2=CC(Br)=CC=C2)N2C=CC3=C(N=CC=N3)C2=N1  c:2,4,7,14,16,20,24,26,30,t:11,22              | Z8854581173 | 1{181} | Nc1nccc2nccnc12               | 2{538} | Cn1cnc1C=O                            | 3{11} | Br1cccc(C[N+]#[C-])c1        | 0.0 | 0 |
| 1031 | 4{334,98,13}  | COC1=CC=C(CNC2=C(N=C3N2C=C2COCC2=C3C#N)C2=NC=C(OC)N=C2)C=C1  c:10,21,32,35,t:2,4,8,14,26,28              | Z8835022915 | 1{334} | Nc1ncc2COCCc2c1C#N            | 2{98}  | COc1cnc(C=O)nc1                       | 3{13} | COc1ccc(C[N+]#[C-])cc1       | 0.0 | 0 |
| 1032 | 4{223,539,50} | NC(=O)C1=NN2C(C=C1)=NC([C@@H]1CC[C@H]1C(F)(F)F)=C2NC1=CC2=C(OCCO2)C=C1  &l:11,16,r,c:7,9,22,35,t:3,26,28 | Z8835022898 | 1{223} | NC(=O)c1ccc(N)nn1             | 2{539} | FC(F)(F)[C@@H]1CCC[C@H]1C=O  &l:4,9,r | 3{50} | [C-]#[N+]c1ccc2OCCOc2c1      | 0.0 | 0 |
| 1033 | 4{223,540,66} | CC(NC1=C(N=C2C=CC(=NN12)C(N)=O)C1C)CC2CN(CC12)C(=O)OC(C)(C)C1=CC=CC=C1  c:7,9,36,38,t:3,5,34             | Z8835022885 | 1{223} | NC(=O)c1ccc(N)nn1             | 2{540} | CC(C)(C)OC(=O)N1CC2CCC(C=O)C2C1       | 3{66} | CC([N+]#[C-])c1cccc1         | 0.0 | 0 |
| 1034 | 4{417,515,49} | CN(C)CC1=CC(=NO1)C1=C(NC2CC(F)(F)C2)N2C=C(Cl)C(=CC2=N1)C(F)(F)F  c:6,10,24,27,t:4,21                     | Z8849597801 | 1{417} | Cl.Nc1cc(c(Cl)cn1)C(F)(F)F    | 2{515} | CN(C)Cc1cc(C=O)no1                    | 3{49} | FC1(F)CC(C1)[N+]#[C-]        | 0.0 | 0 |
| 1035 | 4{406,541,35} | CSCCCNC1=C(N=C2C=CC=C(N12)C1=NNN=N1)C1=C(C)N(N=C1C)C(C)C  c:10,12,20,23,27,t:6,8,17                      | Z8855739120 | 1{406} | Nc1cccc(n1)c2nn[nH]n2         | 2{541} | CC(C)n1nc(C)c(C=O)c1C                 | 3{35} | CSCCC[N+]#[C-]               | 0.0 | 0 |
| 1036 | 4{128,200,23} | COCCN(C)C1=CN2C(C=C1)=NC(CCCC#CC)=C2NC(CCC(=O)OC)C(=O)OC  c:10,12,20,t:6                                 | Z8808559870 | 1{128} | COCCN(C)c1ccc(N)nc1           | 2{200} | CC#CCCCC=O                            | 3{23} | COC(=O)CC(C[N+]#[C-])C(=O)OC | 0.0 | 0 |
| 1037 | 4{223,194,29} | CCOC(=O)CCNC1=C(N=C2C=CC(=NN12)C(N)=O)C1=CC=C(N1C)C(=O)OC  c:12,14,24,t:8,10,22                          | Z8798985052 | 1{223} | NC(=O)c1ccc(N)nn1             | 2{194} | COC(=O)c1ccc(C=O)n1C                  | 3{29} | CCOC(=O)C(C[N+]#[C-])        | 0.0 | 0 |
| 1038 | 4{73,79,9}    | CNC1=C(N=C2C=CC3=NC=CN3N12)C1=NC=CO1  c:6,10,19,t:2,4,8,17                                               | Z8846491979 | 1{73}  | Nc1ccc2nccn2n1                | 2{79}  | O=Cc1ncco1                            | 3{9}  | C[N+]#[C-]                   | 0.0 | 0 |
| 1039 | 4{312,522,38} | COC1=C(C=C(C)C=N1)C1=C(NC2=CC3=C(OCO3)C=C2)N2C(C=CC3=C2NC(=O)NC3=O)=N1  c:7,10,21,26,28,37,t:2,4,13,15   | Z8837933184 | 1{312} | Nc1ccc2c(=O)[nH]c(=O)[nH]c2n1 | 2{522} | COc1ncc(C)c1C=O                       | 3{38} | [C-]#[N+]c1ccc2OCOc2c1       | 0.0 | 0 |

|      |               |                                                                                                |             |        |                        |        |                                |       |                            |     |   |
|------|---------------|------------------------------------------------------------------------------------------------|-------------|--------|------------------------|--------|--------------------------------|-------|----------------------------|-----|---|
| 1040 | 4{83,542,18}  | CC(C)(C)NC1=C(N=C2C=CC(=CN12)P(C)(C)=O)C1N(CC1CCC1)C(=O)OC(C)(C)C  c:9,11,t:5,7                | Z8837933158 | 1{83}  | CP(=O)(C)c1ccc(N)nc1   | 2{542} | CC(C)(C)OC(=O)N1CC2(CCC2)C1C=O | 3{18} | CC(C)(C)[N+][C-]           | 0.0 | 0 |
| 1041 | 4{271,8,62}   | COCC1=NOC=C1C1=C(NC2(CCCC2)C(=O)OC)N2C(C=CC(C(=O)OC)=C2F)=N1  c:6,9,24,30,33,t:3               | Z8837933155 | 1{271} | COC(=O)c1ccc(N)nc1F    | 2{8}   | COCc1nocclC=O                  | 3{62} | COC(=O)C1(CCCC1)[N+][C-]   | 0.0 | 0 |
| 1042 | 4{181,340,14} | CCN1C=NC(=N1)C1=C(NCCOC)N2C=CC3=C(N=CC=N3)C2=N1  c:3,5,8,16,20,22,26,t:18                      | Z8855619535 | 1{181} | Nc1nccc2ncnc12         | 2{340} | CCn1enc(C=O)n1                 | 3{14} | COCC[N+][C-]               | 0.0 | 0 |
| 1043 | 4{111,543,15} | CCNC1=C(N=C2N1C=C(C=C2C)C(=O)OC)C(=O)OCC  c:5,9,11,t:3                                         | Z8878918801 | 1{111} | COC(=O)c1cnc(N)c(C)c1  | 2{543} | CCOC(=O)C=O                    | 3{15} | CC[N+][C-]                 | 0.0 | 0 |
| 1044 | 4{176,512,14} | COCCNC1=C(N=C2N1C=CN=C2N1CCCC1)C1=NC=C(CN(C)C)S1  c:7,11,13,t:5,22,24                          | Z8878918774 | 1{176} | Nc1ncnc1N2CCCC2        | 2{512} | CN(C)Cc1enc(C=O)s1             | 3{14} | COCC[N+][C-]               | 0.0 | 0 |
| 1045 | 4{188,329,71} | COC(=O)C1=CN=CC2=NC(=C(NC3=CC(OC)=CC=C3)N12)C1=C(C)N(CCC1)N=C1C  c:6,17,19,25,32,t:4,8,10,13   | Z8878918673 | 1{188} | COC(=O)c1cnc(N)n1      | 2{329} | Cc1nn(CCC1)c(C)c1C=O           | 3{71} | COC1cccc([N+][C-])c1       | 0.0 | 0 |
| 1046 | 4{193,544,72} | CNC(=O)C1=CN2C(C=C1)=NC(=C2NC1=C(C)C=C(F)C=C1)C1=NN=C2CCCN12  c:8,10,12,16,22,t:4,19,25,27     | Z8878918671 | 1{193} | CNC(=O)c1ccc(N)nc1     | 2{544} | O=Cc1nnc2C(Cc1)N2              | 3{72} | Cc1cc(F)ccc1[N+][C-]       | 0.0 | 0 |
| 1047 | 4{240,545,32} | COCCN1N=C(C)C(=C1C)C1=C(NC2CCC2)N2C=C(C=CC2=N1)C1=NN=N1  c:8,12,21,23,26,32,t:5,29             | Z8878918647 | 1{240} | Nc1ccc(en1)c2nn[nH]n2  | 2{545} | COCCn1nc(C)c(C=O)c1C           | 3{32} | [C-][N+]C1CC1              | 0.0 | 0 |
| 1048 | 4{251,546,62} | COC(=O)C1(CCCC1)NC1=C(N=C2C=CC3=C(NC(=O)C=C3)N12)C1=C(C)N(C)C(C)=C1C  c:15,22,28,34,t:11,13,17 | Z8878918476 | 1{251} | Nc1ccc2ccc(=O)[nH]c2n1 | 2{546} | Cc1c(C)n(C)c(C)c1C=O           | 3{62} | COC(=O)C1(CCCC1)[N+][C-]   | 0.0 | 0 |
| 1049 | 4{413,547,22} | FC(F)(F)C1=NC(Br)=C(S1)C1=C(NC2COC2)N2N=CC(=CC2=N1)C(F)(F)F  c:7,11,20,22,25,t:4               | Z8873684720 | 1{413} | Nc1cc(cnn1)C(F)(F)F    | 2{547} | FC(F)(F)c1nc(Br)c(C=O)s1       | 3{22} | [C-][N+]C1CO1              | 0.0 | 0 |
| 1050 | 4{404,320,29} | CCOC(=O)CCNC1=C(N=C2C=CC=C(OC(C)CC)N12)C1=NN(C)C=N1  c:12,28,t:8,10,14,24                      | Z8873684653 | 1{404} | CCC(C)Oc1cccc(N)n1     | 2{320} | Cn1enc(C=O)n1                  | 3{29} | CCOC(=O)C[N+][C-]          | 0.0 | 0 |
| 1051 | 4{418,293,23} | COC(=O)CCC(NC1=C(N=C2C=C(CBr)C=CN12)C1=C(F)N(C)N=C1)C(=O)OC  c:16,21,26,t:8,10,12              | Z8829498702 | 1{418} | Br.Nc1cc(CBr)ccn1      | 2{293} | Cn1ncc(C=O)c1F                 | 3{23} | COC(=O)CC([N+][C-])C(=O)OC | 0.0 | 0 |

|      |               |                                                                                                                     |             |        |                          |        |                                    |       |                                  |     |   |
|------|---------------|---------------------------------------------------------------------------------------------------------------------|-------------|--------|--------------------------|--------|------------------------------------|-------|----------------------------------|-----|---|
| 1052 | 4{283,548,2}  | COC(=O)C1=CC2=C(N=C1)N1C(C=C2)=NC(CCC2=NC=CN=C2)=C1NC1=CC=C(F)C=C1<br> c:6,8,13,15,22,24,26,35,t:4,20,30,32         | Z8829498469 | 1{283} | COC(=O)c1cnc2nc(N)ccc2c1 | 2{548} | O=CCCc1cnccn1                      | 3{2}  | Fc1ccc([N+]#[C-])cc1             | 0.0 | 0 |
| 1053 | 4{107,520,21} | COC1=C(C=NN=C1)C1=C(NCC2CC2)N2C=C(OCCO)C=CC2=N1<br> c:4,6,9,24,27,t:2,18                                            | Z8854581165 | 1{107} | Nc1ccc(OC CO)cn1         | 2{520} | COc1cnncc1C=O                      | 3{21} | [C-]#[N+]CC1CC1                  | 0.0 | 0 |
| 1054 | 4{419,425,21} | CS(=O)(=O)N1CCCC(C1)C1=C(NCC2CC2)N2C(C=CC(C#C)=C2F)=N1<br> c:11,21,25,28                                            | Z8854581152 | 1{419} | Nc1ccc(C#C)c(F)n1        | 2{425} | CS(=O)(=O)N1CCCC(C1)C=O            | 3{21} | [C-]#[N+]CC1CC1                  | 0.0 | 0 |
| 1055 | 4{62,278,6}   | CCOC(=O)CCCNC1=C(N=C2C=C(CO)C=CN12)C1=C(Br)N=NN1C<br> c:17,22,25,t:9,11,13                                          | Z8835022869 | 1{62}  | Nc1cc(CO)ccn1            | 2{278} | Cn1nnc(Br)c1C=O                    | 3{6}  | CCOC(=O)CC[N+]#[C-]              | 0.0 | 0 |
| 1056 | 4{262,323,12} | CC(=O)NC1=CN2C(NCC3CCOC3)=C(N=C2C=C1)[C@@H]1C[C@@H](C1)NC(=O)OC(C)(C)C<br> r,c:15,17,20,t:4                         | Z8837933177 | 1{262} | CC(=O)Nc1ccc(N)nc1       | 2{323} | CC(C)(C)OC(=O)N[C@H]1C[C@H](C1)C=O | 3{12} | [C-]#[N+]CC1CCOC1                | 0.0 | 0 |
| 1057 | 4{364,478,5}  | COCCCN1=C(N=C2C=CC(=CN12)N1CCNC(=O)C1)C1=CN(C)C(=O)C2=C1C=CN=C2<br> c:10,12,31,34,36,t:6,8,25                       | Z8837933150 | 1{364} | Nc1ccc(en1)N2CCNC(=O)C2  | 2{478} | Cn1cc(C=O)c2ccncc2c1=O             | 3{5}  | COCCC[N+]#[C-]                   | 0.0 | 0 |
| 1058 | 4{409,549,73} | COC(=O)C1=NC=C(C2=C(NC3=C(OC)C=C(OC)C=C3)N3C=CC(=CC3=N2)C2=NN=CN2C)C(C)=C1<br> c:8,11,19,23,25,28,33,39,t:4,6,15,31 | Z8837933147 | 1{409} | Cn1cnncc2ccnc(N)c2       | 2{549} | COC(=O)c1cc(C)c(C=O)cn1            | 3{73} | COc1ccc([N+]#[C-])c(OC)c1        | 0.0 | 0 |
| 1059 | 4{179,550,1}  | COC1=CC2=NC(=C(NC3CC3)N2C=C1)C1=NC(Br)=NN1C<br> c:15,21,t:2,4,6,18                                                  | Z8855619768 | 1{179} | COc1ccnc(N)c1            | 2{550} | Cn1nc(Br)nc1C=O                    | 3{1}  | [C-]#[N+]C1CC1                   | 0.0 | 0 |
| 1060 | 4{420,324,70} | CC(C)(C)OC(=O)N1CCC(C1)NC1=C(N=C2C=CC3=C(NC=N3)N12)C1CC2(C1)CCCO2<br> c:18,23,t:14,16,20                            | Z8878918829 | 1{420} | Cl.Cl.Nc1cc2nc[nH]c2n1   | 2{324} | O=CC1CC2(C1)CCCO2                  | 3{70} | CC(C)(C)OC(=O)N1CCC(C1)[N+]#[C-] | 0.0 | 0 |
| 1061 | 4{376,435,12} | CCOC(=O)C1=NOC(=C1)C1=C(NCC2CCOC2)N2C=C(C1)N=C(OC)C2=N1<br> c:8,11,30,t:5,22,25                                     | Z8878918770 | 1{376} | COc1nc(Cl)cnc1N          | 2{435} | CCOC(=O)c1cc(C=O)on1               | 3{12} | [C-]#[N+]CC1CCOC1                | 0.0 | 0 |
| 1062 | 4{141,551,35} | CSCCCN1=C(N=C2C=C(NC(C)=O)C=CN12)C1CC1(Br)Br<br> c:16,t:6,8,10                                                      | Z8878918596 | 1{141} | CC(=O)Nc1ccnc(N)c1       | 2{551} | BrC1(Br)CC1C=O                     | 3{35} | CSCCC[N+]#[C-]                   | 0.0 | 0 |

|      |               |                                                                                                              |             |        |                                |        |                                  |       |                                   |     |   |
|------|---------------|--------------------------------------------------------------------------------------------------------------|-------------|--------|--------------------------------|--------|----------------------------------|-------|-----------------------------------|-----|---|
| 1063 | 4{187,507,12} | C1C1=CN2C(C=C1C#N)=NC(=C2NCC1CCO<br>C1)C1=CC2=CN=CN2C=C1<br> c:5,9,11,26,30,t:1,22,24                        | Z8878918538 | 1{187} | Nc1cc(C#N<br>)(Cl)cn1          | 2{507} | O=Cc1ccn2c<br>ncc2c1             | 3{12} | [C-<br>]#[N+]CC1C<br>COC1         | 0.0 | 0 |
| 1064 | 4{401,341,39} | CCOCCNC1=C(N=C2C=CC3=C(N=CC=C3Cl<br>N12)C1=CN=C(S1)C(C)O<br> c:10,14,16,25,t:6,8,12,23                       | Z8878918509 | 1{401} | Nc1ccc2c(C<br>l)ccnc2n1        | 2{341} | CC(O)c1ncc(<br>C=O)s1            | 3{39} | CCOCC[N+]<br>#[C-]                | 0.0 | 0 |
| 1065 | 4{19,552,37}  | COC(=O)C1CC(C1)NC1=C(N=C2N1C=CC=C<br>2C#N)C1=CN=C(C=C1)C#C<br> c:12,16,18,25,27,t:10,23                      | Z8878918485 | 1{19}  | Nc1ncccc1<br>C#N               | 2{552} | O=Cc1ccc(C<br>#C)nc1             | 3{37} | COC(=O)C1<br>CC(C1)[N+]<br>#[C-]  | 0.0 | 0 |
| 1066 | 4{251,217,62} | COC(=O)C1(CCCC1)NC1=C(N=C2C=CC3=C<br>(NC(=O)C=C3)N12)C1=CC(=O)N(C)C=C1<br> c:15,22,34,t:11,13,17,28          | Z8878918355 | 1{251} | Nc1ccc2ccc<br>(=O)[nH]c2<br>n1 | 2{217} | Cn1ccc(C=O<br>)cc1=O             | 3{62} | COC(=O)C1(<br>CCCC1)[N+]<br>#[C-] | 0.0 | 0 |
| 1067 | 4{411,55,37}  | COC(=O)C1CC(C1)NC1=C(N=C2C=C(Br)C=<br>C(F)N12)C1=CC(=NC=C1)P(C)(C)=O<br> c:25,27,t:10,12,14,17,23            | Z8873684748 | 1{411} | Nc1cc(Br)c<br>c(F)n1           | 2{55}  | CP(=O)(C)c1<br>cc(C=O)cn1        | 3{37} | COC(=O)C1<br>CC(C1)[N+]<br>#[C-]  | 0.0 | 0 |
| 1068 | 4{72,553,12}  | COC1=NC(Br)=CN2C(NCC3CCOC3)=C(N=C<br>12)C1=CSC(=C1)C1OCCO1<br> c:5,16,25,t:2,18,22                           | Z8873684745 | 1{72}  | COc1nc(Br)<br>cnc1N            | 2{553} | O=Cc1esc(c1<br>)C2OCCO2          | 3{12} | [C-<br>]#[N+]CC1C<br>COC1         | 0.0 | 0 |
| 1069 | 4{421,543,15} | CCNC1=C(N=C2C=CC(C(=O)OC)=C(C1)N12)<br>C(=O)OCC  c:7,t:3,5,13                                                | Z8873684725 | 1{421} | COC(=O)c1<br>ccc(N)nc1C<br>1   | 2{543} | CCOC(=O)C<br>=O                  | 3{15} | CC[N+]#[C-]                       | 0.0 | 0 |
| 1070 | 4{188,492,71} | COC(=O)C1=CN=CC2=NC(=C(NC3=CC(OC)<br>=CC=C3)N12)C1=C(C)N=C(C)C(C)=N1<br> c:6,17,19,25,32,t:4,8,10,13,28      | Z8873684709 | 1{188} | COC(=O)c1<br>cncc(N)n1         | 2{492} | Cc1nc(C)c(C<br>=O)nc1C           | 3{71} | COc1cccc([N<br>+]#[C-])c1         | 0.0 | 0 |
| 1071 | 4{251,372,71} | COC1=CC(NC2=C(N=C3C=CC4=C(NC(=O)C<br>=C4)N23)C2=NN(C)N=C2C)=CC=C1<br> c:10,17,27,30,32,t:2,6,8,12,23         | Z8873685367 | 1{251} | Nc1ccc2ccc<br>(=O)[nH]c2<br>n1 | 2{372} | Cc1nn(C)nc1<br>C=O               | 3{71} | COc1cccc([N<br>+]#[C-])c1         | 0.0 | 0 |
| 1072 | 4{372,526,46} | CC(=C)CNC1=C(N=C2N1C=CC=C2OCC1=C<br>C=NC=C1)C1=CN2N=CC(C(N)=O)=C2N=C1<br> c:7,11,13,20,22,28,33,36,t:5,18,25 | Z8873684842 | 1{372} | Nc1ncccc1<br>OCc2ccncc<br>2    | 2{526} | NC(=O)c1cn<br>n2cc(C=O)cn<br>c12 | 3{46} | CC(=C)C[N+]<br>#[C-]              | 0.0 | 0 |
| 1073 | 4{119,544,72} | CC1=C(NC2=C(N=C3C=CC(=CN23)C#N)C2<br>=NN=C3CCCN23)C=CC(F)=C1<br> c:1,8,10,27,30,t:4,6,17,19                  | Z8873684824 | 1{119} | Nc1ccc(C#<br>N)cn1             | 2{544} | O=Cc1mnc2C<br>CCn12              | 3{72} | Cc1cc(F)ccc<br>1[N+]#[C-]         | 0.0 | 0 |
| 1074 | 4{329,92,31}  | COC1=CC=C(C)C2=NC(C3=CC(C)=NO3)=C(<br>NCCSC)N12  c:13,t:2,4,7,10,16                                          | Z8873684801 | 1{329} | Cl.COc1ccc<br>(C)c(N)n1        | 2{92}  | Cc1cc(C=O)<br>on1                | 3{31} | CSCC[N+]#[<br>C-]                 | 0.0 | 0 |
| 1075 | 4{213,340,31} | CCN1C=NC(=N1)C1=C(NCCSC)N2C(=N1)C(<br>F)=CC=C2OC  c:3,5,8,16,20,22                                           | Z8829498705 | 1{213} | COc1ccc(F)<br>c(N)n1           | 2{340} | CCn1cnc(C=<br>O)n1               | 3{31} | CSCC[N+]#[<br>C-]                 | 0.0 | 0 |



|      |               |                                                                                                      |             |        |                                |        |                                  |       |                                   |     |   |
|------|---------------|------------------------------------------------------------------------------------------------------|-------------|--------|--------------------------------|--------|----------------------------------|-------|-----------------------------------|-----|---|
| 1076 | 4{128,554,1}  | COCCN(C)C1=CN2C(C=C1)=NC(=C2NC1CC1)C1=C(CO)C=CC=C1<br> c:10,12,14,22,26,28,t:6                       | Z8829498587 | 1{128} | COCCN(C)<br>c1ccc(N)nc<br>1    | 2{554} | OCc1cccc1<br>C=O                 | 3{1}  | [C-]<br>#[N+]C1CC<br>1            | 0.0 | 0 |
| 1077 | 4{158,555,7}  | CC1=NN(C(C)=C1C1=C(NC2CCOCC2)N2C=C(N=CC2=N1)P(C)(C)=O)C1=NC=CC=C1<br> c:5,8,19,21,24,33,35,t:1,31    | Z8854581148 | 1{158} | CP(=O)(C)c<br>1cnc(N)cn1       | 2{555} | Cc1nn(c(C)c<br>1C=O)c2cccc<br>n2 | 3{7}  | [C-]<br>#[N+]C1CC<br>OCC1         | 0.0 | 0 |
| 1078 | 4{234,520,12} | COC1=C(C=NN=C1)C1=C(NCC2CCOC2)N2C=CN=C(OC3CCC3)C2=N1<br> c:4,6,9,20,31,t:2,22                        | Z8849597838 | 1{234} | Ne1ncnc1<br>OC2CCC2            | 2{520} | COc1cnccc1<br>C=O                | 3{12} | [C-]<br>#[N+]CC1C<br>COC1         | 0.0 | 0 |
| 1079 | 4{158,556,35} | COC1=CC2=C(NN=C2C2=C(NCCCSC)N3C=C(N=CC3=N2)P(C)(C)=O)C=C1<br> c:7,10,19,21,24,31,t:2,4               | Z8849597799 | 1{158} | CP(=O)(C)c<br>1cnc(N)cn1       | 2{556} | COc1ccc2[n<br>H]nc(C=O)c<br>2c1  | 3{35} | CSCCC[N+]<br>#[C-]                | 0.0 | 0 |
| 1080 | 4{419,164,46} | CN1N=C(C2=C1CCOC2)C1=C(NCC(C)=C)N2C(C=CC(C#C)=C2F)=N1  c:2,4,12,21,25,28                             | Z8855739188 | 1{419} | Ne1ccc(C#<br>C)c(F)n1          | 2{164} | Cn1nc(C=O)<br>c2COCCc21          | 3{46} | CC(=C)C[N+]<br>#[C-]              | 0.0 | 0 |
| 1081 | 4{35,129,9}   | CNC1=C(N=C2C=CC(C)=CN12)C1=CC=CC2=NC=NN12  c:6,9,16,20,t:2,4,14,18                                   | Z8798985036 | 1{35}  | Cc1ccc(N)n<br>c1               | 2{129} | O=Cc1cccc2<br>ncnm12             | 3{9}  | C[N+]#[C-]                        | 0.0 | 0 |
| 1082 | 4{397,532,1}  | COC1=C(OC)C(=NC=N1)C1=C(NC2CC2)N2C=CC(C)=C(C)C2=N1  c:2,6,8,11,19,26,t:22                            | Z8846492153 | 1{397} | Cl.Cc1ccnc(<br>N)c1C           | 2{532} | COc1ncnc(C<br>=O)c1OC            | 3{1}  | [C-]<br>#[N+]C1CC<br>1            | 0.0 | 0 |
| 1083 | 4{84,173,32}  | CC(C)C1=NC=CN2C(NC3CCC3)=C(N=C12)C1=NC(=NN1C)C(F)(F)F  c:5,14,22,t:3,16,20                           | Z8846491988 | 1{84}  | CC(C)c1ncc<br>nc1N             | 2{173} | Cn1nc(nc1C<br>=O)C(F)(F)F        | 3{32} | [C-]<br>#[N+]C1CC<br>C1           | 0.0 | 0 |
| 1084 | 4{422,480,29} | CCOC(=O)CCNC1=C(N=C2N1C(F)=CC=C2C#C)C1=CC2=C(CCOC2)N=C1<br> c:10,15,17,31,t:8,22,24                  | Z8846491751 | 1{422} | Ne1nc(F)cc<br>c1C#C            | 2{480} | O=Cc1cnc2C<br>COCCc2c1           | 3{29} | CCOC(=O)C<br>C[N+]#[C-]           | 0.0 | 0 |
| 1085 | 4{223,557,50} | COC1=NC=C(F)C(=C1)C1=C(NC2=CC3=C(OCCO3)C=C2)N2N=C(C=CC2=N1)C(N)=O<br> c:7,10,22,26,28,31,t:2,4,13,15 | Z8837933142 | 1{223} | NC(=O)c1c<br>cc(N)nn1          | 2{557} | COc1cc(C=O)<br>c(F)cn1           | 3{50} | [C-]<br>#[N+]c1ccc<br>2OCCOc2c1   | 0.0 | 0 |
| 1086 | 4{169,558,9}  | CNC(=O)C1=NN2C(C=C1)=NC(=C2NC)C1=CC(Cl)=NC(C)=C1  c:8,10,12,20,23,t:4,17                             | Z8837933138 | 1{169} | CNC(=O)c1<br>ccc(N)nn1         | 2{558} | Cc1cc(C=O)<br>cc(Cl)n1           | 3{9}  | C[N+]#[C-]                        | 0.0 | 0 |
| 1087 | 4{251,108,62} | COC(=O)C1(CCCC1)NC1=C(N=C2C=CC3=C(NC(=O)C=C3)N12)C1=CN=C(N=C1)N1CCOCC1  c:15,22,30,32,t:11,13,17,28  | Z8878918895 | 1{251} | Ne1ccc2ccc<br>(=O)[nH]c2<br>n1 | 2{108} | O=Cc1cnc(n<br>c1)N2CCOC<br>C2    | 3{62} | COC(=O)C1(<br>CCCC1)[N+]<br>#[C-] | 0.0 | 0 |

|      |               |                                                                                                          |             |        |                         |        |                              |       |                                  |     |   |
|------|---------------|----------------------------------------------------------------------------------------------------------|-------------|--------|-------------------------|--------|------------------------------|-------|----------------------------------|-----|---|
| 1088 | 4{416,559,23} | COC(=O)CCC(NC1=C(CC2CCOC(C)(C)C2)N=C2C=C(CCl)C=CN12)C(=O)OC<br> c:8,26,t:20,22                           | Z8878918846 | 1{416} | Cl.Nc1cc(CCl)ccn1       | 2{559} | CC1(C)CC(C=C=O)CCO1          | 3{23} | COC(=O)CC<br>C([N+]#[C-])C(=O)OC | 0.0 | 0 |
| 1089 | 4{181,560,14} | COCCNC1=C(N=C2N1C=CC1=C2N=CC=N1)C1=NC2=C(CCCC2)S1<br> c:7,11,13,16,18,t:5,21,23                          | Z8878918501 | 1{181} | Nc1nccc2ncnc12          | 2{560} | O=Cc1nc2C<br>CCCc2s1         | 3{14} | COCC[N+]#[C-]                    | 0.0 | 0 |
| 1090 | 4{181,450,6}  | CCOC(=O)CCNC1=C(N=C2N1C=CC1=C2N=CC=N1)C1=CC(=CC=C1)S(=O)(=O)N(C)C<br> c:11,15,17,20,22,27,29,t:9,25      | Z8878918356 | 1{181} | Nc1nccc2ncnc12          | 2{450} | CN(C)S(=O)(=O)c1cccc(C=O)c1  | 3{6}  | CCOC(=O)C<br>CC[N+]#[C-]         | 0.0 | 0 |
| 1091 | 4{423,123,22} | CC(C)OC1=CC=CC2=NC(=C(NC3COC3)N12)C1=NC=C(C)N=C1  c:6,26,t:4,8,10,21,23                                  | Z8873684718 | 1{423} | Cl.CC(C)Oc1cccc(N)n1    | 2{123} | Cc1nc(C=O)cn1                | 3{22} | [C-]<br>#[N+]C1CO<br>C1          | 0.0 | 0 |
| 1092 | 4{251,108,67} | CCC(C)NC1=C(N=C2C=CC3=C(NC(=O)C=C3)N12)C1=CN=C(N=C1)N1CCOCC1<br> c:9,16,24,26,t:5,7,11,22                | Z8873685341 | 1{251} | Nc1ccc2ccc(=O)[nH]c2n1  | 2{108} | O=Cc1nc(n<br>c1)N2CCOC<br>C2 | 3{67} | CCC(C)[N+]<br>#[C-]              | 0.0 | 0 |
| 1093 | 4{240,561,15} | CCNC1=C(N=C2C=CC(=CN12)C1=NNN=N1)C1=C(F)C=C(C=C1)C1=NC=CO1<br> c:7,9,17,20,23,25,30,t:3,5,14,28          | Z8873685268 | 1{240} | Nc1ccc(en1)c2nn[nH]n2   | 2{561} | Fe1cc(ccc1C=O)c2ncco2        | 3{15} | CC[N+]#[C-]                      | 0.0 | 0 |
| 1094 | 4{415,139,21} | CC1=NN(CCO)C(C)=C1C1=C(NCC2CC2)N2C(=N1)C(CCl)=CC=C2Br  c:8,11,20,25,27,t:1                               | Z8873684925 | 1{415} | Cl.Nc1nc(Br)ccc1CCl     | 2{139} | Cc1nn(CCO)c(C)c1C=O          | 3{21} | [C-]<br>#[N+]CC1C<br>C1          | 0.0 | 0 |
| 1095 | 4{424,562,39} | CCOCCNC1=C(N=C2C=CC3=C(NC(=O)CO3)N12)C1=C(OC)C=C(C)C=C1<br> c:10,23,30,t:6,8,12,27                       | Z8873684903 | 1{424} | Nc1ccc2OC<br>C(=O)Nc2n1 | 2{562} | COc1cc(C)cc<br>c1C=O         | 3{39} | CCOCC[N+]<br>#[C-]               | 0.0 | 0 |
| 1096 | 4{211,563,41} | COC1=CC=C(NC2=C(N=C3N2C=CC=C3C2=NN=NN2)C2=CN=C(NC(C)=O)C=C2)C=C1<br> c:9,13,15,20,32,35,t:2,4,7,18,24,26 | Z8829498711 | 1{211} | Nc1ncccc1c2n[nH]2       | 2{563} | CC(=O)Nc1c<br>cc(C=O)cn1     | 3{41} | COc1ccc([N+]#[C-])cc1            | 0.0 | 0 |
| 1097 | 4{425,524,12} | CC(C)OC1=NC=CN2C(NCC3CCOC3)=C(N=C12)C1=C(F)C(F)=NC(F)=C1<br> c:6,17,23,27,30,t:4,19                      | Z8829498569 | 1{425} | CC(C)Oc1nccnc1N         | 2{524} | Fe1cc(C=O)c(F)c(F)n1         | 3{12} | [C-]<br>#[N+]CC1C<br>COC1        | 0.0 | 0 |
| 1098 | 4{167,564,1}  | CN1N=NC=C1C1=C(NC2CC2)N2C(=N1)C(C)=NC=C2C  c:2,4,7,15,19,21                                              | Z8835022914 | 1{167} | Cc1nc(C)(N)n1           | 2{564} | Cn1nccc1C=O                  | 3{1}  | [C-]<br>#[N+]C1CC<br>1           | 0.0 | 0 |
| 1099 | 4{422,565,50} | COC1(CC(C1)C1=C(NC2=CC3=C(OCCO3)C=C2)N2C(=N1)C(=CC=C2F)C#C)OC<br> c:7,19,23,26,28,t:10,12                | Z8835022909 | 1{422} | Nc1nc(F)cc1C#C          | 2{565} | COC1(CC(C1)C=O)OC            | 3{50} | [C-]<br>#[N+]c1ccc<br>2OCCOc2c1  | 0.0 | 0 |

|      |               |                                                                                                    |             |        |                     |        |                        |       |                        |     |   |
|------|---------------|----------------------------------------------------------------------------------------------------|-------------|--------|---------------------|--------|------------------------|-------|------------------------|-----|---|
| 1100 | 4{198,60,32}  | CC(C1CCOC1)C1=C(NC2CCC2)N2C(C=NC(C#C)=C2Cl)=N1  c:8,18,22,25                                       | Z8835022907 | 1{198} | Ne1cnc(C#C)c(Cl)n1  | 2{60}  | CC(C=O)C1CCOC1         | 3{32} | [C-]#[N+]C1CC1         | 0.0 | 0 |
| 1101 | 4{61,388,1}   | CCC1=CC=CC2=NC(=C(NC3CC3)N12)C1=C(N(C)N=C1OC  c:4,22,t:2,6,8,18                                    | Z8855739210 | 1{61}  | CCc1cccc(N)n1       | 2{388} | COc1nn(C)c1C=O         | 3{1}  | [C-]#[N+]C1CC1         | 0.0 | 0 |
| 1102 | 4{231,515,33} | COC1=C(CNC2=C(N=C3C=CC(=NN23)C(F)(F)F)C2=NO(CN(C)C)=C2)C=CC=C1  c:2,10,12,28,31,33,t:6,8,21        | Z8855739129 | 1{231} | Ne1ccc(nn1)C(F)(F)F | 2{515} | CN(C)Cc1cc(C=O)no1     | 3{33} | COc1cccc1C[N+]#[C-]    | 0.0 | 0 |
| 1103 | 4{260,534,14} | COCCNC1=C(N=C2N1C=CC=C2N1CCCC1)C1=NN(C=C1)C(C)C  c:7,11,13,25,t:5,22                               | Z8855739106 | 1{260} | Ne1ncccc1N2CCCC2    | 2{534} | CC(C)n1ccc(C=O)n1      | 3{14} | COCC[N+]#[C-]          | 0.0 | 0 |
| 1104 | 4{271,226,67} | CCC(C)NC1=C(N=C2C=CC(C(=O)OC)=C(F)N12)C1=C(C)N(CC(F)(F)F)N=C1  c:9,21,30,t:5,7,15                  | Z8810903011 | 1{271} | COC(=O)c1ccc(N)nc1F | 2{226} | Cc1c(C=O)cnn1CC(F)(F)F | 3{67} | CCC(C)[N+]#[C-]        | 0.0 | 0 |
| 1105 | 4{169,207,13} | CNC(=O)C1=NN2C(C=C1)=NC(=C2NCC1=C(C=C(OC)C=C1)C1=CC(=NN1C)C(=O)OC  c:8,10,12,23,28,t:4,17,19,26    | Z8810902985 | 1{169} | CNC(=O)c1ccc(N)nn1  | 2{207} | COC(=O)c1cc(C=O)n(C)n1 | 3{13} | COc1ccc(C[N+]#[C-])cc1 | 0.0 | 0 |
| 1106 | 4{260,246,14} | COCCNC1=C(N=C2N1C=CC=C2N1CCCC1)C1CC1CCOC1  c:7,11,13,t:5                                           | Z8810902964 | 1{260} | Ne1ncccc1N2CCCC2    | 2{246} | O=CC1CC21CCCOC2        | 3{14} | COCC[N+]#[C-]          | 0.0 | 0 |
| 1107 | 4{211,3,66}   | CC(NC1=C(N=C2N1C=CC=C2C1=NN=NN1)C1=NC=C(C=C1)C#N)C1=CC=CC=C1  c:5,9,11,16,22,24,31,33,t:3,14,20,29 | Z8798985051 | 1{211} | Ne1ncccc1c2nnn[nH]2 | 2{3}   | O=Cc1ccc(C#N)en1       | 3{66} | CC([N+]#[C-])c1cccc1   | 0.0 | 0 |
| 1108 | 4{92,566,32}  | NC(=O)C1=CC2=NC(=C(NC3CCC3)N2C=C1)C1=C(Cl)N=C2SC=CN12  c:17,20,26,t:3,5,7,23                       | Z8846492139 | 1{92}  | NC(=O)c1ccnc(N)c1   | 2{566} | Clc1nc2scn2c1C=O       | 3{32} | [C-]#[N+]C1CC1         | 0.0 | 0 |
| 1109 | 4{151,170,13} | CCN1N=NC(=N1)C1=C(NCC2=CC=C(OC)C=C2)N2C(C=NC=C2Cl)=N1  c:3,5,8,18,23,25,28,t:12,14                 | Z8837933149 | 1{151} | Ne1cnc(Cl)n1        | 2{170} | CCn1nnc(C=O)n1         | 3{13} | COc1ccc(C[N+]#[C-])cc1 | 0.0 | 0 |
| 1110 | 4{419,236,21} | FC1=C(C=CC2=NC(CCC3OCCO3)=C(NCC3CC3)N12)C#C  c:3,t:1,5,15                                          | Z8855619583 | 1{419} | Ne1ccc(C#C)c(F)n1   | 2{236} | O=CCCC1OCCO1           | 3{21} | [C-]#[N+]CC1C1         | 0.0 | 0 |
| 1111 | 4{419,567,10} | CN1N=C2CCCC2=C1C1=C(NC2CCOC2)N2C(C=CC(C#C)=C2F)=N1  c:8,11,22,26,29,t:2                            | Z8855619516 | 1{419} | Ne1ccc(C#C)c(F)n1   | 2{567} | Cn1nc2CCc2c1C=O        | 3{10} | [C-]#[N+]C1CCOC1       | 0.0 | 0 |
| 1112 | 4{179,42,1}   | COC1=CC2=NC(=C(NC3CC3)N2C=C1)C1=C(N(C)N=C1Cl  c:15,22,t:2,4,6,18                                   | Z8855619513 | 1{179} | COc1cnc(N)c1        | 2{42}  | Cn1cc(C=O)c(Cl)n1      | 3{1}  | [C-]#[N+]C1CC1         | 0.0 | 0 |

|      |               |                                                                                                                    |             |        |                         |        |                             |       |                                  |     |   |
|------|---------------|--------------------------------------------------------------------------------------------------------------------|-------------|--------|-------------------------|--------|-----------------------------|-------|----------------------------------|-----|---|
| 1113 | 4{181,512,26} | CN(C)CC1=CN=C(S1)C1=C(NCC2=CC=C(F)C=C2)N2C=CC3=C(N=CC=N3)C2=N1<br> c:6,10,19,23,27,29,33,t:4,14,16,25              | Z8878918854 | 1{181} | Nc1nccc2ncnc12          | 2{512} | CN(C)Cc1enc(C=O)s1          | 3{26} | Fc1ccc(C[N+][C-])cc1             | 0.0 | 0 |
| 1114 | 4{392,530,67} | CCC(C)NC1=C(N=C2C=CC3=C(NC(C)=N3)N12)C1CC2(CC(C2)OC)C1<br> c:9,15,t:5,7,11                                         | Z8878918595 | 1{392} | Cl.Cc1nc2ccc(N)nc2[nH]1 | 2{530} | COC1CC2(C1)CC(C2)C=O        | 3{67} | CCC(C)[N+][C-]                   | 0.0 | 0 |
| 1115 | 4{251,568,71} | COC1=CC(NC2=C(N=C3C=CC4=C(NC(=O)C=C4)N23)C2=CN=C(S2)C2=NC=CN=C2)=CC=C1<br> c:10,17,25,31,33,35,37,t:2,6,8,12,23,29 | Z8878918353 | 1{251} | Nc1ccc2ccc(=O)[nH]c2n1  | 2{568} | O=Cc1enc(s1)c2cncnc2        | 3{71} | COc1cccc([N+][C-])c1             | 0.0 | 0 |
| 1116 | 4{410,217,62} | COC(=O)C1(CCCC1)NC1=C(N=C2C=CC3=C(N=CC(Cl)=C3)N12)C1=CC(=O)N(C)C=C1<br> c:15,19,22,34,t:11,13,17,28                | Z8873684787 | 1{410} | Nc1ccc2cc(Cl)nc2n1      | 2{217} | Cn1ccc(C=O)cc1=O            | 3{62} | COC(=O)C1(CCCC1)[N+][C-]         | 0.0 | 0 |
| 1117 | 4{420,569,67} | CCC(C)NC1=C(CC2CCOC2=O)N=C2C=CC3=C(NC=N3)N12<br> c:5,17,22,t:15,19                                                 | Z8873685393 | 1{420} | Cl.Cl.Nc1cc2nc[nH]c2n1  | 2{569} | O=CCC1CCOC1=O               | 3{67} | CCC(C)[N+][C-]                   | 0.0 | 0 |
| 1118 | 4{19,316,22}  | COC(=O)C1=CC2=C(C=C1)N=C(C=C2)C1=C(NC2COC2)N2C=CC=C(C#N)C2=N1<br> c:6,8,11,13,16,25,32,t:4,27                      | Z8873685313 | 1{19}  | Nc1ncccc1C#N            | 2{316} | COC(=O)c1ccc2nc(C=O)ccc2c1  | 3{22} | [C-][N+]#C1CO C1                 | 0.0 | 0 |
| 1119 | 4{392,530,39} | CCOCCNC1=C(N=C2C=CC3=C(NC(C)=N3)N12)C1CC2(CC(C2)OC)C1<br> c:10,16,t:6,8,12                                         | Z8873685309 | 1{392} | Cl.Cc1nc2ccc(N)nc2[nH]1 | 2{530} | COC1CC2(C1)CC(C2)C=O        | 3{39} | CCOCC[N+][C-]                    | 0.0 | 0 |
| 1120 | 4{292,444,32} | CCOC1=CN=CC2=NC(=C(NC3CCC3)N12)C1=C(O)C=CN=C1<br> c:5,20,23,25,t:3,7,9                                             | Z8873684915 | 1{292} | CCOc1cnc(N)n1           | 2{444} | Oc1cncnc1C=O                | 3{32} | [C-][N+]#C1CC C1                 | 0.0 | 0 |
| 1121 | 4{151,453,9}  | CNC1=C(N=C2C=NC=C(Cl)N12)C1=CC(C=C)=CN=C1<br> c:6,18,20,t:2,4,8,14                                                 | Z8829498655 | 1{151} | Nc1cnc(Cl)n1            | 2{453} | Cl.C=Cc1cnc(C=O)c1          | 3{9}  | C[N+][C-]                        | 0.0 | 0 |
| 1122 | 4{99,224,41}  | COC1=CC=C(NC2=C(N=C3C=CC(=CN23)S(N)(=O)=O)C2CCOC2C)C=C1<br> c:11,13,29,t:2,4,7,9                                   | Z8854581182 | 1{99}  | Nc1ccc(en1)S(=O)(=O)N   | 2{224} | CC1OCCC1C=O                 | 3{41} | COc1ccc([N+][C-])cc1             | 0.0 | 0 |
| 1123 | 4{262,399,43} | CC(=O)NC1=CN2C(C=C1)=NC(=C2NC1CCN(CC1)C(=O)OC(C)(C)C)C1=CN(N=C1C)C1C<br> c:8,10,12,33,t:4,30                       | Z8835022897 | 1{262} | CC(=O)Nc1ccc(N)nc1      | 2{399} | Cc1nn(cc1C=O)C2CC2          | 3{43} | CC(C)(C)OC(=O)N1CCC(CC1)[N+][C-] | 0.0 | 0 |
| 1124 | 4{144,477,47} | CNS(=O)(=O)C1=CN2C(C=C1)=NC(C(NC(=O)OC(C)(C)C)C1COC1)=C2NC(C)C<br> c:9,11,27,t:5                                   | Z8855739262 | 1{144} | CNS(=O)(=O)c1ccc(N)nc1  | 2{477} | CC(C)(C)OC(=O)NC(C=O)C1COC1 | 3{47} | CC(C)[N+][C-]                    | 0.0 | 0 |

|      |               |                                                                                                      |             |        |                        |        |                                      |       |                            |     |   |
|------|---------------|------------------------------------------------------------------------------------------------------|-------------|--------|------------------------|--------|--------------------------------------|-------|----------------------------|-----|---|
| 1125 | 4{174,202,61} | CC(C)(C)OC(=O)NCCCNC1=C(N=C2C=CC=C(C#N)N12)C1=C(F)C=NC=C1F<br> c:16,25,28,30,t:12,14,18              | Z8846492017 | 1{174} | Nc1cccc(C#N)n1         | 2{202} | Fc1cnc(F)c1C=O                       | 3{61} | CC(C)(C)OC(=O)NCCC[N+][C-] | 0.0 | 0 |
| 1126 | 4{169,570,14} | CNC(=O)C1=NN2C(C=C1)=NC(C1CCN(CC1C)C(=O)OC(C)(C)C)=C2NCCOC<br> c:8,10,27,t:4                         | Z8855619678 | 1{169} | CNC(=O)c1ccc(N)nn1     | 2{570} | CC1CN(CCC1C=O)C(=O)OC(C)(C)C         | 3{14} | COCC[N+][C-]               | 0.0 | 0 |
| 1127 | 4{426,571,67} | CCC(C)NC1=C(N=C2C=C(C=CN12)C1=NN=NN1)C1CC2(CCC2(OC)OC)C1<br> c:9,11,18,t:5,7,16                      | Z8855619619 | 1{426} | Nc1cc(cen1)e2nn[nH]2   | 2{571} | COC1(CCC21CC(C2)C=O)OC               | 3{67} | CCC(C)[N+][C-]             | 0.0 | 0 |
| 1128 | 4{1,22,27}    | CCCCNC1=C(N=C2C=CN12)C1=CC=CC=C1<br> c:9,17,19,t:5,7,15                                              | Z8711892168 | 1{1}   | Nc1cc[nH]n1            | 2{22}  | O=Cc1cccc1                           | 3{27} | CCCC[N+][C-]               | 0.0 | 0 |
| 1129 | 4{427,572,5}  | COCCNC1=C(N=C2C=C3C=CC=NC3=C(O)C)N12)C1=NC(=CC(OC)=C1)C(=O)OC<br> c:12,14,26,30,t:6,8,10,17,24       | Z8878918797 | 1{427} | COc1nc(N)cc2ccnc12     | 2{572} | COC(=O)c1c(O)cc(C=O)n1               | 3{5}  | COCC[N+][C-]               | 0.0 | 0 |
| 1130 | 4{251,573,62} | COC(=O)C1(CCCC1)NC1=C(N=C2C=CC3=C(NC(=O)C=C3)N12)C1=C(C)SN=C1C<br> c:15,22,28,32,t:11,13,17          | Z8878918589 | 1{251} | Nc1ccc2ccc(=O)[nH]c2n1 | 2{573} | Cc1nsc(C)c1C=O                       | 3{62} | COC(=O)C1(CCCC1)[N+][C-]   | 0.0 | 0 |
| 1131 | 4{240,574,22} | CC(C)(C)OC(=O)N[C@H](CC1=C(NC2COC2)N2C=C(C=CC2=N1)C1=NNN=N1)C(C)(C)C<br> c:10,19,21,24,30,t:27       | Z8878918571 | 1{240} | Nc1ccc(en1)c2nn[nH]n2  | 2{574} | CC(C)(C)OC(=O)N[C@H](CC(=O)C(C)(C)C) | 3{22} | [C-][N+][C1CO]C1           | 0.0 | 0 |
| 1132 | 4{240,575,22} | CC(C)(C)OC(=O)NC(CC1=C(NC2COC2)N2C=C(C=CC2=N1)C1=NNN=N1)C(F)(F)F<br> c:10,19,21,24,30,t:27           | Z8878918544 | 1{240} | Nc1ccc(en1)c2nn[nH]n2  | 2{575} | CC(C)(C)OC(=O)NC(CC(=O)C(F)(F)F)     | 3{22} | [C-][N+][C1CO]C1           | 0.0 | 0 |
| 1133 | 4{424,576,39} | CCOCCNC1=C(N=C2C=CC3=C(NC(=O)CO3)N12)C1=C(OC)C=CC=N1<br> c:10,23,27,29,t:6,8,12                      | Z8878918477 | 1{424} | Nc1ccc2OC(C(=O)Nc2n1   | 2{576} | COc1ccnc1C=O                         | 3{39} | CCOCC[N+][C-]              | 0.0 | 0 |
| 1134 | 4{428,544,60} | COC(=O)C1=CC(NC2=C(N=C3C=NC(Br)=CN23)C2=NN=C3CCCN23)=CC=C1<br> c:12,15,29,31,t:4,8,10,20,22          | Z8878918461 | 1{428} | Nc1cnc(Br)cn1          | 2{544} | O=Cc1mnc2CCn12                       | 3{60} | COC(=O)c1ccc([N+][C-])c1   | 0.0 | 0 |
| 1135 | 4{424,577,39} | CCOCCNC1=C(N=C2C=CC3=C(NC(=O)CO3)N12)C1=CC(=CC(F)=C1)C#N<br> c:10,25,28,t:6,8,12,23                  | Z8878918450 | 1{424} | Nc1ccc2OC(C(=O)Nc2n1   | 2{577} | Fc1cc(C=O)c(C#N)c1                   | 3{39} | CCOCC[N+][C-]              | 0.0 | 0 |
| 1136 | 4{19,55,3}    | CP(C)(=O)C1=NC=CC(=C1)C1=C(NC2=C(F)C=C(C1)C=C2)N2C=CC=C(C#N)C2=N1<br> c:6,8,11,14,20,24,31,t:4,17,26 | Z8878918414 | 1{19}  | Nc1ncccc1C#N           | 2{55}  | CP(=O)(C)c1cc(C=O)cn1                | 3{3}  | Fc1cc(Cl)ccc1[N+][C-]      | 0.0 | 0 |

|      |               |                                                                                                 |             |        |                           |        |                          |       |                          |     |   |
|------|---------------|-------------------------------------------------------------------------------------------------|-------------|--------|---------------------------|--------|--------------------------|-------|--------------------------|-----|---|
| 1137 | 4{425,281,46} | COC(=O)C1=NN=C(C=C1)C1=C(NCC(C)=C)N2C=CN=C(OC(C)C)C2=N1<br> c:6,8,11,19,28,t:4,21               | Z8878918359 | 1{425} | CC(C)Oe1nccnc1N           | 2{281} | COC(=O)c1ccc(C=O)nn1     | 3{46} | CC(=C)C[N+]#[C-]         | 0.0 | 0 |
| 1138 | 4{353,547,15} | CCNC1=C(N=C2C=CC(NS(C)(=O)=O)=CN12)C1=C(Br)N=C(S1)C(F)(F)F  c:7,14,19,22,t:3,5                  | Z8873684737 | 1{353} | Cl.CS(=O)(=O)Nc1ccc(N)nc1 | 2{547} | FC(F)(F)c1nc(Br)c(C=O)s1 | 3{15} | CC[N+]#[C-]              | 0.0 | 0 |
| 1139 | 4{420,578,67} | CCC(C)NC1=C(N=C2C=CC3=C(NC=N3)N12)C1=CC(=CC(=C1)C#N)C#N<br> c:9,14,22,24,t:5,7,11,20            | Z8873684712 | 1{420} | Cl.Cl.Nc1cc2nc[nH]c2n1    | 2{578} | O=Cc1cc(C#N)cc(C#N)c1    | 3{67} | CCC(C)[N+]#[C-]          | 0.0 | 0 |
| 1140 | 4{411,188,37} | COC(=O)C1CC(C1)NC1=C(CCC2(CC2)C#N)N=C2C=C(Br)C=C(F)N12  c:10,t:20,22,25                         | Z8873684705 | 1{411} | Nc1cc(Br)cc(F)n1          | 2{188} | O=CCCC1(C1)C#N           | 3{37} | COC(=O)C1CC(C1)[N+]#[C-] | 0.0 | 0 |
| 1141 | 4{54,543,15}  | CCNC1=C(N=C2C=CC(=CN12)C(=O)N(C)C)C(=O)OCC  c:7,9,t:3,5                                         | Z8873684702 | 1{54}  | Cl.CN(C)C(=O)c1ccc(N)nc1  | 2{543} | CCOC(=O)C=O              | 3{15} | CC[N+]#[C-]              | 0.0 | 0 |
| 1142 | 4{251,579,67} | CCCN1C=C(C=N1)C1=C(NC(C)CC)N2C(C=CC3=C2NC(=O)C=C3)=N1<br> c:4,6,9,18,20,26,28                   | Z8873685293 | 1{251} | Nc1ccc2ccc(=O)[nH]c2n1    | 2{579} | CCCN1cc(C=O)en1          | 3{67} | CCC(C)[N+]#[C-]          | 0.0 | 0 |
| 1143 | 4{348,509,2}  | CN1C=NN=C1C1=C(NC2=CC=C(F)C=C2)N2C=C(F)N=CC2=N1<br> c:2,4,7,15,22,25,t:10,12,19                 | Z8873684897 | 1{348} | Nc1cnc(F)c1n1             | 2{509} | Cn1cnc1C=O               | 3{2}  | Fc1ccc([N+]#[C-])cc1     | 0.0 | 0 |
| 1144 | 4{193,520,10} | CNC(=O)C1=CN2C(C=C1)=NC(=C2NC1CCO)C1)C1=C(OC)C=NN=C1<br> c:8,10,12,22,26,28,t:4                 | Z8873684606 | 1{193} | CNC(=O)c1ccc(N)nc1        | 2{520} | COc1cnc1C=O              | 3{10} | [C-]#[N+]C1CCOC1         | 0.0 | 0 |
| 1145 | 4{89,217,71}  | COC1=CC(NC2=C(N=C3C=CC4=C(NN=C4)N23)C2=CC(=O)N(C)C=C2)=CC=C1<br> c:10,15,27,29,31,t:2,6,8,12,21 | Z8873684593 | 1{89}  | Nc1ccc2cn[nH]c2n1         | 2{217} | Cn1ccc(C=O)cc1=O         | 3{71} | COc1cccc([N+]#[C-])c1    | 0.0 | 0 |
| 1146 | 4{187,281,12} | COC(=O)C1=NN=C(C=C1)C1=C(NCC2CCO)C2)N2C=C(Cl)C(=CC2=N1)C#N<br> c:6,8,11,25,28,t:4,22            | Z8873684820 | 1{187} | Nc1cc(C#N)c(Cl)en1        | 2{281} | COC(=O)c1ccc(C=O)nn1     | 3{12} | [C-]#[N+]CC1COC1         | 0.0 | 0 |
| 1147 | 4{73,1,13}    | COC1=CC=C(CNC2=C(N=C3C=CC4=NC=C4)N23)C2=C(Cl)C=NC=C2)C=C1<br> c:12,16,23,26,28,32,t:2,4,8,10,14 | Z8854581154 | 1{73}  | Nc1ccc2cncn2n1            | 2{1}   | Clc1cnc(Cl)c1C=O         | 3{13} | COc1ccc(C[N+]#[C-])cc1   | 0.0 | 0 |
| 1148 | 4{169,97,14}  | CNC(=O)C1=NN2C(C=C1)=NC(=C2NCCOC)C1=CC=C(F)C=C1  c:8,10,12,25,t:4,20,22                         | Z8835022906 | 1{169} | CNC(=O)c1ccc(N)nn1        | 2{97}  | Fc1ccc(C=O)cc1           | 3{14} | COCC[N+]#[C-]            | 0.0 | 0 |

|      |               |                                                                                                          |             |        |                            |        |                                    |       |                                  |     |   |
|------|---------------|----------------------------------------------------------------------------------------------------------|-------------|--------|----------------------------|--------|------------------------------------|-------|----------------------------------|-----|---|
| 1149 | 4{166,580,22} | OCCSCC1=CC2=NC(=C(NC3COC3)N2C=C1)C1=C(F)C(Cl)=NC(Cl)=C1<br> c:19,22,26,29,t:5,7,9                        | Z8835022900 | 1{166} | Nc1cc(CSCCO)ccn1           | 2{580} | Fc1c(Cl)nc(Cl)cc1C=O               | 3{22} | [C-]<br>]#[N+]C1CO<br>C1         | 0.0 | 0 |
| 1150 | 4{330,581,1}  | CCC1=CN=C(O)C1=C(NC2CC2)N2C=C(C=CC2=N1)S(=O)(=O)N(C)C<br> c:4,8,16,18,21,t:2                             | Z8835022884 | 1{330} | CN(C)S(=O)(=O)c1ccc(N)nc1  | 2{581} | CCc1cnc(C=O)o1                     | 3{1}  | [C-]<br>]#[N+]C1CC<br>1          | 0.0 | 0 |
| 1151 | 4{399,582,35} | CSCCCNC1=C(N=C2C=CC(OC(C)C)=NN12)C(CC(F)F)NC(=O)OC(C)C<br> c:10,16,t:6,8                                 | Z8849597814 | 1{399} | CC(C)Oe1c1cc(N)nn1         | 2{582} | CC(C)(C)OC(=O)NC(CC(F)F)C=O        | 3{35} | CSCCC[N+]<br>#[C-]               | 0.0 | 0 |
| 1152 | 4{406,146,7}  | C[C@@H]1C[C@@H]1CCC1=C(NC2CCOC2)N2C(C=CC=C2C2=NNN=N2)=N1<br> &1:1,3,r,c:7,19,21,27,29,t:24               | Z8849597813 | 1{406} | Nc1cccc(n1)c2nn[nH]n2      | 2{146} | C[C@@H]1C[C@@H]1CCC=O<br> &1:1,3,r | 3{7}  | [C-]<br>]#[N+]C1CC<br>OCC1       | 0.0 | 0 |
| 1153 | 4{50,268,7}   | CC[C@@H](NC(=O)OC(C)C)C1=C(NC2CCOCC2)N2C(C=CC=C2P(C)C)=O=N1<br> c:11,23,25,31                            | Z8855739264 | 1{50}  | CP(=O)(C)c1cccc(N)n1       | 2{268} | CC[C@@H](NC(=O)OC(C)C)C=O          | 3{7}  | [C-]<br>]#[N+]C1CC<br>OCC1       | 0.0 | 0 |
| 1154 | 4{429,200,23} | COC(=O)CCC(NC1=C(CCCC#CC)N=C2N1C=CC=C2CBr)C(=O)OC<br> c:8,16,20,22                                       | Z8846492230 | 1{429} | Br.Nc1nccc1CBr             | 2{200} | CC#CCCCC=O                         | 3{23} | COC(=O)CC<br>C([N+]#[C-])C(=O)OC | 0.0 | 0 |
| 1155 | 4{334,137,11} | CC1=C(C(C)=NO1)C1=C(NCC2=CC(Br)=CC=C2)N2C=C3COCCC3=C(C#N)C2=N1<br> c:4,8,15,17,33,t:1,12,21,28           | Z8837933169 | 1{334} | Nc1ncc2COCCc2c1C#N         | 2{137} | Cc1noc(C)c1C=O                     | 3{11} | Br1cccc(C[<br>N+]#[C-])c1        | 0.0 | 0 |
| 1156 | 4{283,8,71}   | COCC1=NOC=C1C1=C(NC2=CC(OC)=CC=C2)N2C(C=CC3=C2N=CC(=C3)C(=O)OC)=N1<br> c:6,9,16,18,23,25,28,30,36,t:3,12 | Z8837933153 | 1{283} | COC(=O)c1cnc2nc(N)cc2c1    | 2{8}   | COCC1nocc1C=O                      | 3{71} | COc1cccc([N+]#[C-])c1            | 0.0 | 0 |
| 1157 | 4{169,30,9}   | CNC(=O)C1=NN2C(C=C1)=NC(C1CCN(CC1)C(C)=O)=C2NC<br> c:8,10,22,t:4                                         | Z8855619766 | 1{169} | CNC(=O)c1ccc(N)nn1         | 2{30}  | CC(=O)N1C<br>CC(CC1)C=O            | 3{9}  | C[N+]#[C-]                       | 0.0 | 0 |
| 1158 | 4{167,550,1}  | CN1N=C(Br)N=C1C1=C(NC2CC2)N2C(=N1)C(C)=NC=C2C<br> c:5,8,16,20,22,t:2                                     | Z8855619760 | 1{167} | Cc1cnc(C)(N)n1             | 2{550} | Cn1nc(Br)nc1C=O                    | 3{1}  | [C-]<br>]#[N+]C1CC<br>1          | 0.0 | 0 |
| 1159 | 4{430,583,34} | CC1=C(N2C=CC(Cl)=CC2=N1)C1=C(NCC2C<br>CCO2)N2C=CC3=C(C2=N1)S(=O)(=O)NC3=O<br> c:4,7,10,13,24,26,29,t:1   | Z8855619649 | 1{430} | Nc1nccc2C(=O)NS(=O)(=O)c21 | 2{583} | Cc1nc2cc(Cl)ccn2c1C=O              | 3{34} | [C-]<br>]#[N+]CC1C<br>CCO1       | 0.0 | 0 |
| 1160 | 4{192,79,14}  | COCCNC1=C(N=C2N1C(F)=CC=C2Cl)C1=N<br>C=CO1<br> c:7,12,14,20,t:5,18                                       | Z8855619641 | 1{192} | Nc1nc(F)cc1Cl              | 2{79}  | O=Cc1ncco1                         | 3{14} | COCC[N+]#[<br>C-]                | 0.0 | 0 |

Parallel synthesis of compound library 4, main experiment

|      |               |                                                                                                        |             |        |                          |        |                      |       |                                  |       |    |
|------|---------------|--------------------------------------------------------------------------------------------------------|-------------|--------|--------------------------|--------|----------------------|-------|----------------------------------|-------|----|
| 1161 | 4{28,189,7}   | C1CC(CCO1)NC1=C(N=C2C=C(C=CN12)C1=NOC=N1)C1=CN(N=N1)C1CCOCC1<br> c:12,14,22,28,t:8,10,19,25            | Z8878918418 | 1{28}  | Cl.Nc1cc(ccn1)c2ncon2    | 2{189} | O=Cc1cn(nn1)C2CCOCC2 | 3{7}  | [C-]<br>#[N+]C1CCOCC1            | 105.1 | 89 |
| 1162 | 4{180,336,32} | COC(=O)C1=CC2=NC(=C(NC3CCC3)N2C=C1C)C1=CSN=C1OC  c:18,25,t:4,6,8,22                                    | Z8878918612 | 1{180} | COC(=O)c1cc(N)ncc1C      | 2{336} | COc1nscclC=O         | 3{32} | [C-]<br>#[N+]C1CCOCC1            | 83.5  | 83 |
| 1163 | 4{76,584,23}  | COC(=O)CCC(NC1=C(N=C2C=CC(C)=C(C1)N12)C1=C(OC)C=C(C)N=C1)C(=O)OC<br> c:12,21,28,t:8,10,15,25           | Z8873684644 | 1{76}  | Cc1ccc(N)nc1Cl           | 2{584} | COc1cc(C)nc1C=O      | 3{23} | COC(=O)CC<br>C([N+]#[C-])C(=O)OC | 100.6 | 81 |
| 1164 | 4{180,545,35} | COCCN1N=C(C)C(=C1C)C1=C(NCCCSC)N2C=C(C)C(=CC2=N1)C(=O)OC<br> c:8,12,24,27,t:5,21                       | Z8878918407 | 1{180} | COC(=O)c1cc(N)ncc1C      | 2{545} | COCCn1nc(C)c(C=O)c1C | 3{35} | CSCCC[N+]#[C-]                   | 96.9  | 81 |
| 1165 | 4{405,585,5}  | COCCCN1=C(CC2CC2(Cl)Cl)N=C2C=CC(=CN12)N1CCCC1=O  c:6,17,19,t:15                                        | Z8855739175 | 1{405} | Nc1ccc(cn1)N2CCCC2=O     | 2{585} | ClC1(Cl)CC1CC=O      | 3{5}  | COCCCN1#[C-]                     | 86.6  | 78 |
| 1166 | 4{392,586,67} | CCC(C)NC1=C(N=C2C=CC3=C(NC(C)=N3)N12)C1=CC2=C(COC2)N=C1<br> c:9,15,29,t:5,7,11,21,23                   | Z8878918627 | 1{392} | Cl.Cc1nc2ccc(N)nc2[nH]1  | 2{586} | O=Cc1cnc2COCc2c1     | 3{67} | CCC(C)[N+]#[C-]                  | 75.2  | 77 |
| 1167 | 4{374,587,5}  | COCCCN1=C(N=C2C=CC=C(N12)C(=O)OC)C1=C(C)ON=C1OC  c:10,12,21,25,t:6,8                                   | Z8835022866 | 1{374} | COC(=O)c1cccc(N)n1       | 2{587} | COc1noc(C)c1C=O      | 3{5}  | COCCCN1#[C-]                     | 76.2  | 75 |
| 1168 | 4{431,588,61} | CN1C=C(C(C)=N1)C1=C(NCCCNC(=O)OC(C)(C)C)N2C=C(F)C=CC2=N1<br> c:2,5,8,26,29,t:23                        | Z8878918395 | 1{431} | Nc1ccc(F)cn1             | 2{588} | Cc1nn(C)cc1C=O       | 3{61} | CC(C)(C)OC(=O)NCCC[N+]#[C-]      | 80.5  | 74 |
| 1169 | 4{64,589,49}  | CN1N=C(C)C(=C1Cl)C1=C(NC2CC(F)(F)C2)N2C=C(C=CC2=N1)N1CCCS1(=O)=O<br> c:5,9,20,22,25,t:2                | Z8878918677 | 1{64}  | Nc1ccc(cn1)N2CCCS2(=O)=O | 2{589} | Cc1nn(C)c(C1)c1C=O   | 3{49} | FC1(F)CC(C1)[N+]#[C-]            | 91.5  | 72 |
| 1170 | 4{153,336,53} | COC1=NSC=C1C1=C(NCCOCC2=CC=CC=C2)N2C(C=CC=C2C(C)O)=N1<br> c:5,8,17,19,24,26,32,t:2,15                  | Z8855619615 | 1{153} | CC(C)(O)c1cccc(N)n1      | 2{336} | COc1nscclC=O         | 3{53} | [C-]<br>#[N+]CCOCC1CCCC1         | 84.8  | 72 |
| 1171 | 4{103,590,59} | OCC1=CN=CC2=NC(=C(NCCC3=CC(F)=CC=C3)N12)C1=CN=C(C=C1)C1=CSC=N1<br> c:4,16,18,26,28,34,t:2,6,8,13,24,31 | Z8878918413 | 1{103} | Nc1cncc(CO)n1            | 2{590} | O=Cc1ccc(nc1)c2cscn2 | 3{59} | Fc1cccc(CC[N+]#[C-])c1           | 86.3  | 72 |



|      |               |                                                                                                |             |        |                          |        |                        |       |                           |      |    |
|------|---------------|------------------------------------------------------------------------------------------------|-------------|--------|--------------------------|--------|------------------------|-------|---------------------------|------|----|
| 1172 | 4{362,326,21} | CNC(=O)C1=CC=CC2=NC(=C(NCC3CC3)N12)C1=CC=NN1C  c:6,23,t:4,8,10,21                              | Z8878918629 | 1{362} | CNC(=O)c1cccc(N)n1       | 2{326} | Cn1ncccc1C=O           | 3{21} | [C-]<br>#[N+]CC1C<br>C1   | 61.3 | 70 |
| 1173 | 4{105,591,29} | CCOC(=O)CCNC1=C(N=C2C=CC=C(N12)C(N)=O)C1=CC=C(C=C1)N1CCOCC1  c:12,14,24,26,t:8,10,22           | Z8878918651 | 1{105} | NC(=O)c1cccc(N)n1        | 2{591} | O=Cc1ccc(cc1)N2CCOCC2  | 3{29} | CCOC(=O)C<br>C[N+]#[C-]   | 82.0 | 69 |
| 1174 | 4{365,592,10} | COC(=O)C1=CC(=CN1C)C1=C(NC2CCOC2)N2C(C=C(C)C=C2C)=N1  c:6,11,25,28,t:4,22                      | Z8878918853 | 1{365} | Cc1cc(C)nc(N)c1          | 2{592} | COC(=O)c1cc(C=O)en1C   | 3{10} | [C-]<br>#[N+]C1CC<br>OC1  | 68.9 | 69 |
| 1175 | 4{62,593,6}   | CCOC(=O)CCNC1=C(N=C2C=C(CO)C=CN12)C1=CC=C(NC(C)=O)C=C1  c:17,30,t:9,11,13,22,24                | Z8873685260 | 1{62}  | Nc1cc(CO)ccn1            | 2{593} | CC(=O)Nc1ccc(C=O)cc1   | 3{6}  | CCOC(=O)C<br>CC[N+]#[C-]  | 76.2 | 69 |
| 1176 | 4{28,461,7}   | CCN1N=CC(=C1F)C1=C(NC2CCOCC2)N2C=CC(=CC2=N1)C1=NOC=N1  c:3,5,9,20,22,25,31,t:28                | Z8873684724 | 1{28}  | Cl.Nc1cc(ccn1)c2ncon2    | 2{461} | CCn1ncc(C=O)c1F        | 3{7}  | [C-]<br>#[N+]C1CC<br>OCC1 | 73.7 | 69 |
| 1177 | 4{362,594,12} | CNC(=O)C1=CC=CC2=NC(=C(NCC3CCOC3)N12)C1=CC=C(C=C1)N(C)C  c:6,25,27,t:4,8,10,23                 | Z8855739195 | 1{362} | CNC(=O)c1cccc(N)n1       | 2{594} | CN(C)c1ccc(C=O)cc1     | 3{12} | [C-]<br>#[N+]CC1C<br>COC1 | 72.9 | 69 |
| 1178 | 4{50,595,7}   | CN1C=C2C=C(C=CC2=N1)C1=C(NC2CCOC2)N2C(C=CC=C2P(C)(C)=O)=N1  c:4,6,9,12,24,26,32,t:2            | Z8878918460 | 1{50}  | CP(=O)(C)c1cccc(N)n1     | 2{595} | Cn1cc2cc(C=O)ccc2n1    | 3{7}  | [C-]<br>#[N+]C1CC<br>OCC1 | 77.4 | 68 |
| 1179 | 4{109,335,41} | COC1=CC=C(NC2=C(N=C3C=CC=C(N23)S(N)(=O)=O)C2=CN(N=C2)C2CCOCC2)C=C1  c:11,13,25,35,t:2,4,7,9,22 | Z8855739105 | 1{109} | Cl.Nc1cccc(n1)S(=O)(=O)N | 2{335} | O=Cc1cnn(cc1)C2CCOCC2  | 3{41} | COc1ccc([N+]#[C-])cc1     | 84.6 | 67 |
| 1180 | 4{37,596,12}  | CN1N=C(C)C2=C1N=CC(=C2)C1=C(NCC2COC2)N2C(C=CC=C2C(F)F)=N1  c:5,8,10,13,25,27,32,t:2            | Z8873685247 | 1{37}  | Cl.Nc1cccc(n1)C(F)F      | 2{596} | Cc1nn(C)c2ncc(C=O)cc12 | 3{12} | [C-]<br>#[N+]CC1C<br>COC1 | 73.7 | 66 |
| 1181 | 4{42,192,7}   | COC1=NC(=CC=C1)C1=C(NC2CCOCC2)N2C=C(SC)C=CC2=N1  c:4,6,9,24,27,t:2,20                          | Z8855619653 | 1{42}  | CSc1ccc(N)nc1            | 2{192} | COc1cccc(C=O)n1        | 3{7}  | [C-]<br>#[N+]C1CC<br>OCC1 | 65.2 | 65 |
| 1182 | 4{125,597,7}  | CC1=C(C)N=C(O1)C1=C(NC2CCOCC2)N2C=C(CCO)C=CC2=N1  c:1,4,8,24,27,t:19                           | Z8873685318 | 1{125} | Nc1ccc(CC)ocn1           | 2{597} | Cc1nc(C=O)oc1C         | 3{7}  | [C-]<br>#[N+]C1CC<br>OCC1 | 62.6 | 65 |
| 1183 | 4{333,152,29} | CCOC(=O)CCNC1=C(N=C2C=CC=C(N12)C1=CC=NC=C1)C(C)CCC(=O)OC  c:12,14,21,23,t:8,10,19              | Z8878918843 | 1{333} | Nc1cccc(n1)c2ccncc2      | 2{152} | COC(=O)CC(C)C=O        | 3{29} | CCOC(=O)C<br>C[N+]#[C-]   | 73.1 | 64 |

|      |               |                                                                                                      |             |        |                            |        |                                  |       |                                  |      |    |
|------|---------------|------------------------------------------------------------------------------------------------------|-------------|--------|----------------------------|--------|----------------------------------|-------|----------------------------------|------|----|
| 1184 | 4{432,452,22} | CC1=CC2=NC(=C(NC3COC3)N2C=C1I)C1=CC=C(C=C1)C(N)=O  c:15,21,23,t:1,3,5,19                             | Z8835022888 | 1{432} | Cc1cc(N)nc1                | 2{452} | NC(=O)c1ccc(C=O)cc1              | 3{22} | [C-]<br>]#[N+]C1CO<br>C1         | 76.9 | 64 |
| 1185 | 4{414,598,10} | COC1=CC(OC)=C(C2=C(NC3CCOC3)N3C=C(CI)N=CC3=N2)C(C)=C1  c:8,21,24,28,t:2,6,18                         | Z8878918855 | 1{414} | Nc1cnc(Cl)cn1              | 2{598} | COc1cc(C)c(C=O)c(OC)c1           | 3{10} | [C-]<br>]#[N+]C1CC<br>OC1        | 66.7 | 64 |
| 1186 | 4{50,599,7}   | CC1=CC(=CC(C)=C1OC(F)F)C1=C(NC2CCOCC2)N2C(C=CC=C2P(C)(C)=O)=N1  c:3,6,13,25,27,33,t:1                | Z8873684592 | 1{50}  | CP(=O)(C)c1cccc(N)n1       | 2{599} | Cc1cc(C=O)cc(C)c1OC(F)F          | 3{7}  | [C-]<br>]#[N+]C1CC<br>OCC1       | 79.2 | 63 |
| 1187 | 4{36,30,13}   | COC1=CC=C(CNC2=C(N=C3C=CC(Br)=CN23)C2CCN(CC2)C(C)=O)C=C1  c:12,15,30,t:2,4,8,10                      | Z8835022908 | 1{36}  | Nc1ccc(Br)cn1              | 2{30}  | CC(=O)N1C<br>CC(CC1)C=O          | 3{13} | COc1ccc(C[<br>N+]#[C-])cc1       | 77.7 | 63 |
| 1188 | 4{105,600,50} | CS(=O)(=O)CCN1C=C(C=N1)C1=C(NC2=CC3=C(OCCO3)C=C2)N2C(C=CC=C2C(N)=O)=N1  c:7,9,12,24,29,31,36,t:15,17 | Z8829498490 | 1{105} | NC(=O)c1cccc(N)n1          | 2{600} | CS(=O)(=O)<br>CCn1cc(C=O)<br>cn1 | 3{50} | [C-]<br>]#[N+]c1ccc<br>2OCCOc2c1 | 81.3 | 62 |
| 1189 | 4{73,24,20}   | COC1=CC(C)=C(NC2=C(N=C3C=CC4=NC=CN4N23)C2=CC(=CC=C2)N(C)C)C=C1  c:12,16,25,27,33,t:2,5,8,10,14,23    | Z8873685335 | 1{73}  | Nc1ccc2nccn2n1             | 2{24}  | CN(C)c1cccc(C=O)c1               | 3{20} | COc1ccc([N<br>+]#[C-])c(C)c1     | 69.5 | 62 |
| 1190 | 4{50,601,7}   | CC1=C(C=CC(=C1)C1=C(NC2CCOCC2)N2C(C=CC=C2P(C)(C)=O)=N1)C1CC1  c:3,5,8,20,22,28,t:1                   | Z8873684736 | 1{50}  | CP(=O)(C)c1cccc(N)n1       | 2{601} | Cc1cc(C=O)ccc1C2CC2              | 3{7}  | [C-]<br>]#[N+]C1CC<br>OCC1       | 67.6 | 62 |
| 1191 | 4{118,422,32} | CC(O)C1=CC=CC2=NC(C3CC33CCOC3)=C(NC3CCC3)N12  c:5,t:3,7,18                                           | Z8855739136 | 1{118} | Cl.CC(O)c1cccc(N)n1        | 2{422} | O=CC1CC21<br>CCOC2               | 3{32} | [C-]<br>]#[N+]C1CC<br>C1         | 54.4 | 62 |
| 1192 | 4{369,54,7}   | COC1=C(C=CS1)C1=C(NC2CCOCC2)N2C=C(C=CC2=N1)C(F)C(F)(F)F  c:4,8,19,21,24,t:2                          | Z8873684631 | 1{369} | Cl.Nc1ccc(cn1)C(F)C(F)(F)F | 2{54}  | COc1sccc1C=O                     | 3{7}  | [C-]<br>]#[N+]C1CC<br>OCC1       | 71.3 | 61 |
| 1193 | 4{118,602,31} | CSCCN1=C(N=C2C=CC=C(C(C)O)N12)C1=CC=C(C=C1)C(=O)NC1CC1  c:9,21,23,t:5,7,11,19                        | Z8878918307 | 1{118} | Cl.CC(O)c1cccc(N)n1        | 2{602} | O=Cc1ccc(cc1)C(=O)NC2<br>CC2     | 3{31} | CSCC[N+]#[<br>C-]                | 67.9 | 61 |
| 1194 | 4{394,603,12} | COC(=O)C1=CC(=NS1)C1=C(NCC2CCOC2)N2C(C=CC(C=C)=C2F)=N1  c:6,10,22,26,29,t:4                          | Z8873685487 | 1{394} | Nc1ccc(C=C)c(F)n1          | 2{603} | COC(=O)c1cc(C=O)ns1              | 3{12} | [C-]<br>]#[N+]CC1C<br>COC1       | 66.3 | 61 |
| 1195 | 4{50,604,7}   | CCN1N=C(C2=C1C=CC=C2)C1=C(NC2CCOCC2)N2C(C=CC=C2P(C)(C)=O)=N1  c:3,5,8,10,13,25,27,33                 | Z8873684666 | 1{50}  | CP(=O)(C)c1cccc(N)n1       | 2{604} | CCn1nc(C=O)c2cccc12              | 3{7}  | [C-]<br>]#[N+]C1CC<br>OCC1       | 71.3 | 60 |

|      |               |                                                                                                    |             |        |                            |        |                                  |       |                                  |      |    |
|------|---------------|----------------------------------------------------------------------------------------------------|-------------|--------|----------------------------|--------|----------------------------------|-------|----------------------------------|------|----|
| 1196 | 4{28,340,18}  | CCN1C=NC(=N1)C1=C(NC(C)(C)C)N2C=CC(=CC2=N1)C1=NOC=N1<br> c:3,5,8,16,18,21,27,t:24                  | Z8878918333 | 1{28}  | Cl.Nc1cc(ccn1)c2ncon2      | 2{340} | CCn1cnc(C=O)n1                   | 3{18} | CC(C)(C)[N+][C-]                 | 57.4 | 60 |
| 1197 | 4{142,605,10} | COC1=C(C=CC(=C1)C(F)F)C1=C(NC2CCOC2)N2C=CC=C(OCCS(C)(=O)=O)C2=N1<br> c:4,6,12,22,34,t:2,24         | Z8878918427 | 1{142} | CS(=O)(=O)CCOc1cccn1N      | 2{605} | COc1ccc(cc1C=O)C(F)F             | 3{10} | [C-]#[N+]C1CCOC1                 | 78.3 | 60 |
| 1198 | 4{431,16,10}  | CN1N=CC(CNC(=O)OC(C)(C)C)=C1C1=C(NC2CCOC2)N2C=C(F)C=CC2=N1<br> c:2,13,16,29,32,t:26                | Z8878918826 | 1{431} | Nc1ccc(F)c n1              | 2{16}  | Cn1ncc(CNC(=O)OC(C)(C)C)c1C=O    | 3{10} | [C-]#[N+]C1CCOC1                 | 69.8 | 60 |
| 1199 | 4{431,606,10} | CC(C)(C)OC(=O)N1CC(C2=C(NC3CCOC3)N3C=C(F)C=CC3=N2)C2(CC2)C1<br> c:10,23,26,t:20                    | Z8878918807 | 1{431} | Nc1ccc(F)c n1              | 2{606} | CC(C)(C)OC(=O)N1CC(C=O)C2(CC2)C1 | 3{10} | [C-]#[N+]C1CCOC1                 | 67.5 | 60 |
| 1200 | 4{125,64,31}  | CSCNC1=C(N=C2C=CC(CCO)=CN12)C1=CC=C(C=C1)N1C=CN=C1<br> c:9,14,21,23,27,29,t:5,7,19                 | Z8873684773 | 1{125} | Nc1ccc(CCO)n1              | 2{64}  | O=Cc1ccc(cc1)n2ccnc2             | 3{31} | CSCC[N+][C-]                     | 63.7 | 60 |
| 1201 | 4{69,328,21}  | CCC1=NNC=C1C1=C(NCC2CC2)N2C=CC(=CC2=N1)C(=O)NC<br> c:5,8,17,19,22,t:2                              | Z8878918912 | 1{69}  | CNC(=O)c1ccnc(N)c1         | 2{328} | Cl.CCc1n[nH]cc1C=O               | 3{21} | [C-]#[N+]CC1CC1                  | 54.7 | 60 |
| 1202 | 4{73,607,20}  | COC1=CC(C)=C(NC2=C(N=C3C=CC4=NC=CN4N23)C2=CN(N=C2)C(C)(C)C)C=C1<br> c:12,16,26,33,t:2,5,8,10,14,23 | Z8878918447 | 1{73}  | Nc1ccc2nccn2n1             | 2{607} | CC(C)(C)n1cc(C=O)c n1            | 3{20} | COc1ccc([N+][C-])c(C)c1          | 66.8 | 60 |
| 1203 | 4{142,608,10} | CS(=O)(=O)CCOC1=CC=CN2C(NC3CCOC3)=C(CC3(CCC3)C#N)N=C12<br> c:9,t:7,19,29                           | Z8878918597 | 1{142} | CS(=O)(=O)CCOc1cccn1N      | 2{608} | O=CCC1(CC1)C#N                   | 3{10} | [C-]#[N+]C1CCOC1                 | 66.7 | 59 |
| 1204 | 4{164,609,43} | CN(C)CC1=CC2=NC(=C(NC3CCN(CC3)C(=O)OC(C)(C)C)N2C=C1)C1=CSC=N1<br> c:27,33,t:4,6,8,30               | Z8878918897 | 1{164} | CN(C)Cc1ccnc(N)c1          | 2{609} | O=Cc1csen1                       | 3{43} | CC(C)(C)OC(=O)N1CCC(CC1)[N+][C-] | 72.6 | 59 |
| 1205 | 4{353,610,15} | CCNC1=C(N=C2C=CC(NS(C)(=O)=O)=CN12)C1=C(F)C(F)=C(C=C1)C(=O)OC<br> c:7,14,19,23,25,t:3,5            | Z8873684834 | 1{353} | Cl.CS(=O)(=O)Nc1ccc(N)n1   | 2{610} | COC(=O)c1ccc(C=O)c(F)c1F         | 3{15} | CC[N+][C-]                       | 67.4 | 59 |
| 1206 | 4{52,297,7}   | CCN1N=C(C)C(=N1)C1=C(NC2CCOCC2)N2C=C(C=CC2=N1)C1(CC1)C(F)(F)F<br> c:6,9,20,22,25,t:3               | Z8878918531 | 1{52}  | Nc1ccc(cn1)C2(CC2)C(F)(F)F | 2{297} | CCn1nc(C)c(C=O)n1                | 3{7}  | [C-]#[N+]C1CCOCC1                | 68.9 | 59 |

|      |               |                                                                                                                 |             |        |                                  |        |                                                  |       |                           |      |    |
|------|---------------|-----------------------------------------------------------------------------------------------------------------|-------------|--------|----------------------------------|--------|--------------------------------------------------|-------|---------------------------|------|----|
| 1207 | 4{125,124,31} | COC1=C(OCC2=C(C)ON=C2C)C=CC(=C1)C1=C(NCCSC)N2C=C(CCO)C=CC2=N1<br> c:2,6,10,14,16,19,32,35,t:27                  | Z8873684793 | 1{125} | Nc1ccc(CC<br>O)cn1               | 2{124} | COc1cc(C=O)<br>)ccc1OCc2c(<br>C)noc2C            | 3{31} | CSCC[N+]#[<br>C-]         | 75.9 | 58 |
| 1208 | 4{64,611,49}  | COC1=CC(=CC(OC)=C1)C1=C(NC2CC(F)(F)<br>C2)N2C=C(C=CC2=N1)N1CCCS1(=O)=O<br> c:4,8,11,22,24,27,t:2                | Z8878918362 | 1{64}  | Nc1ccc(cn1<br>)N2CCCS2(<br>=O)=O | 2{611} | COc1cc(OC)<br>cc(C=O)c1                          | 3{49} | FC1(F)CC(C<br>1)[N+]#[C-] | 75.1 | 58 |
| 1209 | 4{350,165,5}  | COCCNC1=C(N=C2C=NC(=CN12)C1=CC=<br>CC=C1)C1=NN(C=C1)[C@H]1C[C@H](C1<br>)C(=O)OC  r,c:10,12,19,21,27,t:6,8,17,24 | Z8873684588 | 1{350} | Nc1enc(cn1<br>)c2ccccc2          | 2{165} | COC(=O)[C<br>@H]1C[C@<br>@H](C1)n2c<br>cc(C=O)n2 | 3{5}  | COCC[N+]<br>#[C-]         | 72.2 | 58 |
| 1210 | 4{125,612,7}  | CN(C)C1=C(F)C=C(C2=C(NC3CCOCC3)N3C<br>=C(CCO)C=CC3=N2)C(F)=C1<br> c:3,8,24,27,31,t:6,19                         | Z8873685302 | 1{125} | Nc1ccc(CC<br>O)cn1               | 2{612} | CN(C)c1cc(F)<br>)c(C=O)cc1F                      | 3{7}  | [C-<br>]#[N+]C1CC<br>OCC1 | 65.2 | 58 |
| 1211 | 4{433,472,7}  | COC(=O)C1=CC2=C(C=NN2C=C1)C1=C(NC<br>2CCOCC2)N2C(C=CC(C#C)=C2C)=N1<br> c:8,12,15,27,31,34,t:4,6                 | Z8873685352 | 1{433} | Cc1nc(N)cc<br>c1C#C              | 2{472} | COC(=O)c1c<br>cn2ncc(C=O)<br>c2c1                | 3{7}  | [C-<br>]#[N+]C1CC<br>OCC1 | 67.2 | 58 |
| 1212 | 4{50,613,7}   | CN1C=C2C=CC=C(C2=N1)C1=C(NC2CCOC<br>C2)N2C(C=CC=C2P(C)(C)=O)=N1<br> c:4,6,9,12,24,26,32,t:2                     | Z8878918464 | 1{50}  | CP(=O)(C)c<br>1cccc(N)n1         | 2{613} | Cn1cc2cccc(<br>C=O)c2n1                          | 3{7}  | [C-<br>]#[N+]C1CC<br>OCC1 | 65.9 | 58 |
| 1213 | 4{371,614,12} | CC(C)CN1C=C(C=N1)C1=C(NCC2CCOC2)N<br>2C=CC=C(OCCCC#N)C2=N1<br> c:5,7,10,21,32,t:23                              | Z8878918368 | 1{371} | Nc1ncccc1<br>OCCCC#N             | 2{614} | CC(C)Cn1cc(<br>C=O)cn1                           | 3{12} | [C-<br>]#[N+]CC1C<br>COC1 | 65.7 | 58 |
| 1214 | 4{362,486,12} | CNC(=O)C1=CC=CC2=NC(=C(NCC3CCOC3<br>)N12)C1=C(Cl)N=C(Cl)N1C<br> c:6,23,t:4,8,10,26                              | Z8878918802 | 1{362} | CNC(=O)c1c<br>cccc(N)n1          | 2{486} | Cn1c(Cl)nc(<br>Cl)c1C=O                          | 3{12} | [C-<br>]#[N+]CC1C<br>COC1 | 65.8 | 58 |
| 1215 | 4{71,615,21}  | IC1=CN2C(C=N1)=NC(C1=CN(N=C1)C1=NC<br>=CC=C1)=C2NCC1CC1<br> c:5,7,13,18,20,22,t:1,10,16                         | Z8878918800 | 1{71}  | Nc1nc(I)cn<br>1                  | 2{615} | O=Cc1nnc(<br>1)c2ccccn2                          | 3{21} | [C-<br>]#[N+]CC1C<br>C1   | 71.0 | 58 |
| 1216 | 4{92,616,7}   | CCOC1=C(OC(F)F)C=CC(=C1)C1=C(NC2CC<br>OCC2)N2C=CC(=CC2=N1)C(N)=O<br> c:3,9,11,14,25,27,30                       | Z8873685472 | 1{92}  | NC(=O)c1c<br>cnc(N)c1            | 2{616} | CCOc1cc(C=<br>O)ccc1OC(F)<br>F                   | 3{7}  | [C-<br>]#[N+]C1CC<br>OCC1 | 69.3 | 57 |
| 1217 | 4{64,617,49}  | CC(C)C1=NNC(=C1)C1=C(NC2CC(F)(F)C2)<br>N2C=C(C=CC2=N1)N1CCCS1(=O)=O<br> c:6,9,20,22,25,t:3                      | Z8846491763 | 1{64}  | Nc1ccc(cn1<br>)N2CCCS2(<br>=O)=O | 2{617} | CC(C)c1cc(C<br>=O)[nH]n1                         | 3{49} | FC1(F)CC(C<br>1)[N+]#[C-] | 69.7 | 57 |
| 1218 | 4{362,618,10} | CNC(=O)C1=CC=CC2=NC(=C(NC3CCOC3)<br>N12)C1=C(C)C=C(C=C1)C(F)F<br> c:6,22,25,27,t:4,8,10                         | Z8835022880 | 1{362} | CNC(=O)c1c<br>cccc(N)n1          | 2{618} | Cc1cc(ccc1C<br>=O)C(F)F                          | 3{10} | [C-<br>]#[N+]C1CC<br>OC1  | 61.9 | 57 |

|      |               |                                                                                                      |             |        |                          |        |                         |       |                                   |      |    |
|------|---------------|------------------------------------------------------------------------------------------------------|-------------|--------|--------------------------|--------|-------------------------|-------|-----------------------------------|------|----|
| 1219 | 4{164,619,12} | COC1=C(SC)C=CC(=C1)C1=C(NCC2CCOC2)N2C=CC(CN(C)C)=CC2=N1  c:2,6,8,11,22,28,31                         | Z8878918823 | 1{164} | CN(C)Cc1ccnc(N)c1        | 2{619} | COe1ccc(C=O)ccc1SC      | 3{12} | [C-]#[N+]CC1COC1                  | 65.9 | 57 |
| 1220 | 4{412,531,12} | CC1=NC=C(C=N1)C1=C(NCC2CCOC2)N2C=C(Br)C(CO)=CC2=N1  c:3,5,8,24,27,t:1,19                             | Z8873685276 | 1{412} | Nc1cc(CO)c(Br)cn1        | 2{531} | Cc1nccc(C=O)cn1         | 3{12} | [C-]#[N+]CC1COC1                  | 64.5 | 57 |
| 1221 | 4{69,33,51}   | CNC(=O)C1=CC2=NC(C3CCCN(C3)C(C)=O)=C(NCCNC(=O)OC(C)(C)C)N2C=C1  c:33,t:4,6,18                        | Z8829498629 | 1{69}  | CNC(=O)c1ccnc(N)c1       | 2{33}  | CC(=O)N1C CCC(C1)C=O    | 3{51} | CC(C)(C)OC(=O)NCC[N+]#[C-]        | 70.7 | 57 |
| 1222 | 4{386,42,5}   | COCCCN1=C(N=C2C=C(C)C=CN12)C1=CN(C)N=C1Cl  c:13,22,t:6,8,10,18                                       | Z8855739213 | 1{386} | Cc1ccnc(N)c1             | 2{42}  | Cn1cc(C=O)c(Cl)n1       | 3{5}  | COCCCN[+]#[C-]                    | 51.3 | 57 |
| 1223 | 4{286,620,5}  | COCCCN1=C(N=C2C=CC(=CN12)C1=NC=CC=C1)C1=C(Cl)N(C)N=C1  c:10,12,19,21,24,29,t:6,8,17                  | Z8873684813 | 1{286} | Cl.Cl.Nc1ccc(en1)c2cccn2 | 2{620} | Cn1nccc(C=O)c1Cl        | 3{5}  | COCCCN[+]#[C-]                    | 61.0 | 57 |
| 1224 | 4{107,621,43} | CC1=C(N=CC=C1)C1=C(NC2CCN(CC2)C(=O)OC(C)(C)C)N2C=C(OCCO)C=CC2=N1  c:3,5,8,32,35,t:1,26               | Z8878918760 | 1{107} | Nc1ccc(OC CO)cn1         | 2{621} | Cc1cccnc1C=O            | 3{43} | CC(C)(C)OC(=O)N1CCC(CC1)[N+]#[C-] | 71.8 | 57 |
| 1225 | 4{333,219,23} | COC(=O)CCC(NC1=C(N=C2C=CC=C(N12)C1=CC=NC=C1)C1=CN(C)C(=C1)C#N)C(=O)OC  c:12,14,21,23,30,t:8,10,19,26 | Z8878918787 | 1{333} | Nc1cccc(n1)c2ccncc2      | 2{219} | Cn1cc(C=O)cc1C#N        | 3{23} | COC(=O)CC(C[N+]#[C-])C(=O)OC      | 72.6 | 57 |
| 1226 | 4{434,54,7}   | COC1=C(C=CS1)C1=C(NC2CCOCC2)N2C=C(C=CC2=N1)C(C)(F)F  c:4,8,19,21,24,t:2                              | Z8878918451 | 1{434} | CC(F)(F)c1ccc(N)nc1      | 2{54}  | COc1secc1C=O            | 3{7}  | [C-]#[N+]C1CCOCC1                 | 60.2 | 57 |
| 1227 | 4{371,622,12} | CCNC(=O)COC1=CC=C(C=C1)C1=C(NCC2CCOC2)N2C=CC=C(OCCCC#N)C2=N1  c:9,11,14,25,36,t:7,27                 | Z8873684585 | 1{371} | Nc1ncccc1OCCCC#N         | 2{622} | CCNC(=O)COc1ccc(C=O)cc1 | 3{12} | [C-]#[N+]CC1COC1                  | 73.0 | 57 |
| 1228 | 4{167,623,5}  | COCCCN1=C(N=C2N1C(C)=CN=C2C)C1=C(OC)C=C(OCC#N)C=C1  c:8,13,15,19,29,t:6,23                           | Z8878918766 | 1{167} | Cc1enc(C)c(N)n1          | 2{623} | COe1cc(OC C#N)ccc1C=O   | 3{5}  | COCCCN[+]#[C-]                    | 60.5 | 57 |
| 1229 | 4{48,624,15}  | CCNC1=C(N=C2C=C(C=CN12)S(C)(=O)=O)C1=C(C)NN=C1Br  c:7,9,18,22,t:3,5                                  | Z8846492000 | 1{48}  | CS(=O)(=O)c1ccnc(N)c1    | 2{624} | Cc1[nH]nc(Br)c1C=O      | 3{15} | CC[N+]#[C-]                       | 60.9 | 57 |
| 1230 | 4{187,164,12} | CN1N=C(C2=C1CCOC2)C1=C(NCC2CCOC2)N2C=C(Cl)C(=CC2=N1)C#N  c:2,4,12,26,29,t:23                         | Z8878918577 | 1{187} | Nc1cc(C#N)c(Cl)cn1       | 2{164} | Cn1nc(C=O)c2COCCc21     | 3{12} | [C-]#[N+]CC1COC1                  | 63.1 | 57 |

|      |               |                                                                                                  |             |        |                         |        |                          |       |                               |      |    |
|------|---------------|--------------------------------------------------------------------------------------------------|-------------|--------|-------------------------|--------|--------------------------|-------|-------------------------------|------|----|
| 1231 | 4{357,452,49} | NC(=O)C1=CC=C(C=C1)C1=C(NC2CC(F)(F)C2)N2C=C(C=CC2=N1)N1CCCC(CO)CC1<br> c:5,7,10,21,23,26,t:3     | Z8873685383 | 1{357} | Nc1ccc(en1)N2CCC(CO)CC2 | 2{452} | NC(=O)c1ccc(C=O)cc1      | 3{49} | FC1(F)CC(C1)[N+]#[C-]         | 69.6 | 57 |
| 1232 | 4{92,361,7}   | NC(=O)C1=CC2=NC(=C(NC3CCOCC3)N2C=C1)C1=C(Br)C=CC(Br)=N1<br> c:19,22,25,28,t:3,5,7                | Z8837933172 | 1{92}  | NC(=O)c1cnc(N)c1        | 2{361} | Br1ccc(Br)c(C=O)n1       | 3{7}  | [C-]#[N+]C1CCOCC1             | 75.7 | 57 |
| 1233 | 4{212,425,49} | COCC1=CN2C(C=C1)=NC(C1CCCN(C1)S(C)(=O)=O)=C2NC1CC(F)(F)C1<br> c:7,9,22,t:3                       | Z8878918794 | 1{212} | Cl.COCc1ccc(N)nc1       | 2{425} | CS(=O)(=O)N1CCCC(C1)C=O  | 3{49} | FC1(F)CC(C1)[N+]#[C-]         | 65.5 | 57 |
| 1234 | 4{435,219,23} | COC(=O)CCC(NC1=C(N=C2N1C=C(Br)C=C2)C1=CN(C)C(=C1)C#N)C(=O)OC<br> c:10,17,25,t:8,14,21            | Z8873685363 | 1{435} | Cc1ccc(Br)cn1N          | 2{219} | Cn1cc(C=O)cc1C#N         | 3{23} | COC(=O)CC(C([N+]#[C-])C(=O)OC | 74.6 | 57 |
| 1235 | 4{118,625,31} | COC1=C(OCC2=CN=CC=C2)C=C(C=C1)C1=C(NCCSC)N2C(C=CC=C2C(C)O)=N1<br> c:2,8,10,13,15,18,27,29,34,t:6 | Z8878918332 | 1{118} | Cl.CC(O)c1cccc(N)n1     | 2{625} | COc1ccc(C=O)cc1OCc2ccnc2 | 3{31} | CSCC[N+]#[C-]                 | 70.8 | 56 |
| 1236 | 4{69,392,46}  | CNC(=O)C1=CC2=NC(C3CCOCC3)=C(NCC(C)=C)N2C=C1<br> c:24,t:4,6,15                                   | Z8878918588 | 1{69}  | CNC(=O)c1ccnc(N)c1      | 2{392} | O=CC1CCOCC1              | 3{46} | CC(=C)C[N+]#[C-]              | 49.8 | 56 |
| 1237 | 4{62,243,6}   | CCOC(=O)CCCN1=C(N=C2C=C(CO)C=CN12)C1=CON=C1CC<br> c:17,25,t:9,11,13,22                           | Z8835022875 | 1{62}  | Nc1cc(CO)cn1            | 2{243} | CCc1nocc1C=O             | 3{6}  | CCOC(=O)CC[N+]#[C-]           | 56.5 | 56 |
| 1238 | 4{436,585,23} | CCC1=CC2=NC(CC3CC3(C1)C1)=C(NC(CCC(=O)OC)C(=O)OC)N2C=C1<br> c:29,t:2,4,13                        | Z8878918311 | 1{436} | CCc1ccnc(N)c1           | 2{585} | ClC1(Cl)CC1CC=O          | 3{23} | COC(=O)CC(C([N+]#[C-])C(=O)OC | 67.1 | 56 |
| 1239 | 4{40,626,22}  | CC(=O)N1CCC2=C(C1)C=C(S2)C1=C(NC2COC2)N2C(C=C(C=C2)C(F)(F)F)=N1<br> c:6,10,14,24,26,33           | Z8878918861 | 1{40}  | Cc1cc(cc(N)n1)C(F)(F)F  | 2{626} | CC(=O)N1CCe2sc(C=O)cc2C1 | 3{22} | [C-]#[N+]C1COC1               | 63.3 | 56 |
| 1240 | 4{107,627,61} | CCC1=NC(C)=C(N1)C1=C(NCCCNC(=O)OC(C)(C)C)N2C=C(OCCO)C=CC2=N1<br> c:5,9,30,33,t:2,24              | Z8878918682 | 1{107} | Nc1ccc(OC)CO)cn1        | 2{627} | CCc1nc(C)c(C=O)[nH]1     | 3{61} | CC(C)(C)OC(=O)NCCC[N+]#[C-]   | 69.3 | 56 |
| 1241 | 4{187,628,10} | COCC1=C(C=CC=C1)C1=C(NC2CCOC2)N2C=C(Cl)C(=CC2=N1)C#N<br> c:5,7,10,23,26,t:3,20                   | Z8878918779 | 1{187} | Nc1cc(C#N)c(Cl)cn1      | 2{628} | COc1cccc1C=O             | 3{10} | [C-]#[N+]C1CCOC1              | 57.7 | 56 |
| 1242 | 4{351,629,39} | CCOCCN1=C(N=C2C=CC3=C(C(O)CC3)N12)C1=C(C)C=C(C)C=N1<br> c:10,22,28,t:6,8,12,25                   | Z8873684794 | 1{351} | Nc1ccc2CC(C(O)c2n1      | 2{629} | Cc1cnc(C=O)c(C)c1        | 3{39} | CCOCC[N+]#[C-]                | 55.2 | 56 |
| 1243 | 4{76,630,23}  | COCCN1C=C(C=N1)C1=C(NC(CCC(=O)OC)C(=O)OC)N2C(C=CC(C)=C2Cl)=N1<br> c:5,7,10,26,29,32              | Z8855739199 | 1{76}  | Cc1ccc(N)nc1Cl          | 2{630} | COCCn1cc(C=O)cn1         | 3{23} | COC(=O)CC(C([N+]#[C-])C(=O)OC | 69.8 | 56 |

|      |               |                                                                                               |             |        |                                |        |                              |       |                             |      |    |
|------|---------------|-----------------------------------------------------------------------------------------------|-------------|--------|--------------------------------|--------|------------------------------|-------|-----------------------------|------|----|
| 1244 | 4{437,586,67} | CCC(C)NC1=C(N=C2C=CC3=C(NC(=N3)C(F)(F)F)N12)C1=CC2=C(COC2)N=C1<br> c:9,14,32,t:5,7,11,24,26   | Z8835022891 | 1{437} | Cl.Nc1ccc2nc([nH]c2n1)C(F)(F)F | 2{586} | O=Cc1cnc2COCc2c1             | 3{67} | CCC(C)[N+]#[C-]             | 62.7 | 56 |
| 1245 | 4{112,304,61} | COC1=CN=CC2=NC(=C(NCCCNC(=O)OC(C)(C)C)N12)C1=C(C)N(CC(F)F)N=C1<br> c:4,25,33,t:2,6,8          | Z8829498762 | 1{112} | COc1cnc(N)n1                   | 2{304} | Cc1c(C=O)cnn1CC(F)F          | 3{61} | CC(C)(C)OC(=O)NCCC[N+]#[C-] | 70.0 | 56 |
| 1246 | 4{180,206,22} | COC(=O)C1=CC2=NC(C[C@H](C)NC(=O)OC(C)(C)C)=C(NC3COC3)N2C=C1C<br> c:29,t:4,6,19                | Z8878918791 | 1{180} | COC(=O)c1cc(N)nc1C             | 2{206} | C[C@@H](CC=O)NC(=O)OC(C)(C)C | 3{22} | [C-]#[N+]C1CO C1            | 59.5 | 56 |
| 1247 | 4{109,631,34} | COC1=NC=C(C2=C(NCC3CCCO3)N3C(C=C)C=C3S(N)(=O)=O=N2)C(OC)=C1<br> c:6,18,20,26,31,t:2,4         | Z8837933179 | 1{109} | Cl.Nc1cccc(n1)S(=O)(=O)N       | 2{631} | COc1cc(OC)c(C=O)cn1          | 3{34} | [C-]#[N+]CC1C CCO1          | 65.0 | 56 |
| 1248 | 4{363,305,38} | COCC1=NC(=CN1)C1=C(NC2=CC3=C(OCO3)C=C2)N2C=CC(=CC2=N1)C(=O)OC<br> c:5,9,20,24,26,29,t:3,12,14 | Z8849597828 | 1{363} | COC(=O)c1ccnc(N)c1             | 2{305} | COCC1nc(C=O)c[nH]1           | 3{38} | [C-]#[N+]c1ccc2OCOc2c1      | 63.0 | 55 |
| 1249 | 4{384,399,10} | CCOC1=C(C)N2C(NC3CCOC3)=C(N=C2C=C1)C1=CN(N=C1C)C1CC1<br> c:3,14,16,19,25,t:22                 | Z8878918784 | 1{384} | CCOc1ccc(N)nc1C                | 2{399} | Cc1nn(cc1C=O)C2CC2           | 3{10} | [C-]#[N+]C1CCOC1            | 57.1 | 55 |
| 1250 | 4{212,632,49} | COCC1=CN2C(C=C1)=NC(=C2NC1CC(F)F)C1)C1=C(OC)C=CC(F)=C1<br> c:7,9,11,22,26,29,t:3              | Z8855739201 | 1{212} | Cl.COCC1ccc(N)nc1              | 2{632} | COc1ccc(F)c1C=O              | 3{49} | FC1(F)CC(C1)[N+]#[C-]       | 58.5 | 55 |
| 1251 | 4{105,357,34} | CCC1=C(C(C)=NO1)C1=C(NCC2CCCO2)N2C(C=CC=C2C(N)=O)=N1<br> c:5,9,21,23,28,t:2                   | Z8837933175 | 1{105} | NC(=O)c1ccc(N)n1               | 2{357} | CCc1onc(C)c1C=O              | 3{34} | [C-]#[N+]CC1C CCO1          | 55.2 | 55 |
| 1252 | 4{327,633,41} | COC(=O)C1=C(F)C2=NC(=C(NC3=CC=C(OC)C=C3)N2C=C1)C1=CN=C1OC<br> c:4,18,23,29,t:7,9,12,14,26     | Z8878918608 | 1{327} | COC(=O)c1ccnc(N)c1F            | 2{633} | COc1n[nH]c1C=O               | 3{41} | COc1ccc([N+]#[C-])cc1       | 61.5 | 55 |
| 1253 | 4{42,153,7}   | CSC1=CN2C(NC3CCOCC3)=C(N=C2C=C1)C1=CN(CC(F)F)N=N1<br> c:13,15,18,29,t:2,21                    | Z8855619755 | 1{42}  | CSc1ccc(N)nc1                  | 2{153} | FC(F)(F)Cn1cc(C=O)nn1        | 3{7}  | [C-]#[N+]C1CCOCC1           | 61.6 | 55 |
| 1254 | 4{187,314,51} | CC(C)(C)OC(=O)NCCNC1=C(N=C2C=C(C#N)C(CI)=CN12)C1=CN=C1<br> c:20,28,t:11,13,15,25              | Z8873685419 | 1{187} | Nc1cc(C#N)c(Cl)cn1             | 2{314} | O=Cc1cn[nH]c1                | 3{51} | CC(C)(C)OC(=O)NCC[N+]#[C-]  | 59.9 | 55 |
| 1255 | 4{368,425,49} | CN1C=C(C=N1)C1=C(C)N2C(C=C1)=NC(C1CCCN(C1)S(C)(=O)=O)=C2NC1CC(F)(F)C1<br> c:2,4,7,12,14,27    | Z8878918422 | 1{368} | Cc1nc(N)cc1c2cnn(C)c2          | 2{425} | CS(=O)(=O)N1CCCC(C1)C=O      | 3{49} | FC1(F)CC(C1)[N+]#[C-]       | 71.4 | 55 |

|      |               |                                                                                                  |             |        |                           |        |                              |       |                          |      |    |
|------|---------------|--------------------------------------------------------------------------------------------------|-------------|--------|---------------------------|--------|------------------------------|-------|--------------------------|------|----|
| 1256 | 4{118,634,31} | CSCCNC1=C(N=C2C=CC=C(C(C)O)N12)C(C)C1CCOCC1  c:9,t:5,7,11                                        | Z8873684888 | 1{118} | Cl.CC(O)c1cccc(N)n1       | 2{634} | CC(C=O)C1CCOCC1              | 3{31} | CSCC[N+][C-]             | 54.2 | 55 |
| 1257 | 4{109,635,34} | CCOC(=O)C1=COC(=C1)C1=C(NCC2CCCO2)N2C(C=CC=C2S(N)(=O)=O)=N1  c:8,11,23,25,31,t:5                 | Z8878918497 | 1{109} | Cl.Nc1cccc(n1)S(=O)(=O)N  | 2{635} | CCOC(=O)c1coc(C=O)c1         | 3{34} | [C-]#[N+]CC1COCO1        | 64.7 | 55 |
| 1258 | 4{28,310,18}  | CC(C)(C)NC1=C(N=C2C=C(C=CN12)C1=NO)C=N1)C1CCOC2(CCC2)C1  c:9,11,19,t:5,7,16                      | Z8878918576 | 1{28}  | Cl.Nc1cc(ccn1)c2ncon2     | 2{310} | O=CC1CCOC2(CCC2)C1           | 3{18} | CC(C)(C)[N+][C-]         | 56.8 | 55 |
| 1259 | 4{80,233,62}  | COC(=O)C1(CCCC1)NC1=C(CCCOCC=C)N=C2N1C=CN=C2OC  c:11,20,24,26                                    | Z8855739111 | 1{80}  | COc1ncnc1N                | 2{233} | C=CCOCCC=O                   | 3{62} | COC(=O)C1(CCCC1)[N+][C-] | 57.9 | 55 |
| 1260 | 4{353,138,53} | CC1=NC(C)=NC(=C1)C1=C(NCCOCC2=CC=CC=C2)N2C=C(NS(C)(=O)=O)C=CC2=N1  c:4,6,9,18,20,31,34,t:1,16,24 | Z8878918620 | 1{353} | Cl.CS(=O)(=O)Nc1ccc(N)nc1 | 2{138} | Cc1cc(C=O)nc(C)n1            | 3{53} | [C-]#[N+]CCOCc1cccc1     | 69.5 | 55 |
| 1261 | 4{64,636,33}  | COC1=C(CNC2=C(N=C3C=CC(=CN23)N2CCS2(=O)=O)C2=CN(C)N=C2)C=CC=C1  c:2,10,12,29,32,34,t:6,8,25      | Z8878918493 | 1{64}  | Nc1ccc(en1)N2CCCS2(=O)=O  | 2{636} | Cn1cc(C=O)cn1                | 3{33} | COc1cccc1C[N+][C-]       | 67.3 | 55 |
| 1262 | 4{104,637,46} | CC(=C)CNC1=C(N=C2C=CC3=C(COCC3)N12)C1=CC2=C(C=C1)S(=O)(=O)CCC2  c:9,23,25,t:5,7,11,21            | Z8835022899 | 1{104} | Nc1ccc2CCOCc2n1           | 2{637} | O=Cc1ccc2c(CCCS2(=O)=O)c1    | 3{46} | CC(=C)C[N+][C-]          | 63.0 | 55 |
| 1263 | 4{438,314,12} | CCC1=C(Br)C=CC2=NC(C3=CNN=C3)=C(NCC3CCOC3)N12  c:2,5,13,t:7,10,15                                | Z8878918792 | 1{438} | CCc1nc(N)ccc1Br           | 2{314} | O=Cc1cn[nH]c1                | 3{12} | [C-]#[N+]CC1COC1         | 58.0 | 55 |
| 1264 | 4{99,638,34}  | NS(=O)(=O)C1=CN2C(NCC3CCCO3)=C(N=C2C=C1)C1=CN(CC2CCOCC2)N=C1  c:15,17,20,34,t:4,23               | Z8855739112 | 1{99}  | Nc1ccc(en1)S(=O)(=O)N     | 2{638} | O=Cc1cnn(C2CCOCC2)c1         | 3{34} | [C-]#[N+]CC1COCO1        | 68.4 | 55 |
| 1265 | 4{123,277,22} | CC(C)(C)OC(=O)NC(CC1=C(NC2COC2)N2C=CC(OCCO)=CC2=N1)C1CC1  c:10,19,25,28                          | Z8878918908 | 1{123} | Cl.Nc1cc(OCCO)ccn1        | 2{277} | CC(C)(C)OC(=O)NC(CC(=O)C1CC1 | 3{22} | [C-]#[N+]C1COC1          | 59.2 | 55 |
| 1266 | 4{91,639,7}   | CC1=NN=C(O1)C1=CC(=CC=C1)C1=C(NC2CCOCC2)N2C=C(C=CC2=N1)C(N)=O  c:3,9,11,14,25,27,30,t:1,7        | Z8873684799 | 1{91}  | NC(=O)c1ccc(N)nc1         | 2{639} | Cc1nnc(o1)c2cccc(C=O)c2      | 3{7}  | [C-]#[N+]C1CCOCC1        | 62.1 | 55 |
| 1267 | 4{49,63,13}   | COCN1N=CC=C1C1=C(NCC2=CC=C(OC)C=C2)N2C(C=CC=C2CO)=N1  c:4,6,9,19,24,26,30,t:13,15                | Z8873684609 | 1{49}  | Nc1cccc(CO)n1             | 2{63}  | COc1ncccc1C=O                | 3{13} | COc1ccc(C[N+][C-])cc1    | 58.4 | 55 |



|      |               |                                                                                                              |             |        |                          |        |                                   |       |                                      |      |    |
|------|---------------|--------------------------------------------------------------------------------------------------------------|-------------|--------|--------------------------|--------|-----------------------------------|-------|--------------------------------------|------|----|
| 1268 | 4{97,280,49}  | CC1=CC(F)=CN2C(NC3CC(F)(F)C3)=C(N=C12)C1=NSC(=C1)[N+](=[O-])=O<br> c:4,15,24,t:1,17,21                       | Z8837933162 | 1{97}  | Cc1cc(F)cn<br>c1N        | 2{280} | [O-]<br>][N+](=O)c1<br>cc(C=O)ns1 | 3{49} | FC1(F)CC(C<br>1)[N+]#[C-]            | 56.9 | 55 |
| 1269 | 4{69,596,61}  | CNC(=O)C1=CC2=NC(=C(NCCCNC(=O)OC(C)<br>(C)C)N2C=C1)C1=CC2=C(N=C1)N(C)N=C<br>2C  c:24,29,31,36,t:4,6,8,27     | Z8873685321 | 1{69}  | CNC(=O)c1<br>ccnc(N)c1   | 2{596} | Cc1nn(C)c2n<br>cc(C=O)cc12        | 3{61} | CC(C)(C)OC<br>(=O)NCCC[<br>N+]#[C-]  | 73.1 | 55 |
| 1270 | 4{32,640,7}   | CC(C)N1C=C(N=N1)C1=C(NC2CCOCC2)N2<br>C=CC(=CC2=N1)P(C)(C)=O  c:4,6,9,20,22,25                                | Z8878918430 | 1{32}  | CP(=O)(C)c<br>1ccnc(N)c1 | 2{640} | CC(C)n1cc(C<br>=O)nn1             | 3{7}  | [C-]<br>]#[N+]C1CC<br>OCC1           | 59.6 | 55 |
| 1271 | 4{37,641,10}  | CC1=NC(C)=C(S1)C1=C(NC2CCOC2)N2C(C<br>=CC=C2C(F)F)=N1  c:4,8,19,21,26,t:1                                    | Z8878918319 | 1{37}  | Cl.Nc1cccc(<br>n1)C(F)F  | 2{641} | Cc1nc(C)c(C<br>=O)s1              | 3{10} | [C-]<br>]#[N+]C1CC<br>OC1            | 54.0 | 55 |
| 1272 | 4{77,35,23}   | COC(=O)CCC(NC1=C(N=C2C=CC(=CN12)C<br>1=CN=CC=C1)C1=NN(C)C(C)=C1Cl)C(=O)O<br>C  c:12,14,21,23,31,t:8,10,19,26 | Z8854581168 | 1{77}  | Nc1ccc(en1<br>)c2cccnc2  | 2{35}  | Cc1c(Cl)c(C<br>=O)nn1C            | 3{23} | COC(=O)CC<br>C([N+]#[C-<br>])C(=O)OC | 73.5 | 55 |
| 1273 | 4{49,112,6}   | CCOC(=O)CCCNC1=C(N=C2C=CC=C(CO)N<br>12)C1=C2C=CC=NN2N=C1<br> c:13,22,24,26,30,t:9,11,15                      | Z8849597835 | 1{49}  | Nc1cccc(C<br>O)n1        | 2{112} | O=Cc1cnn2n<br>cccc12              | 3{6}  | CCOC(=O)C<br>CC[N+]#[C-]             | 58.3 | 55 |
| 1274 | 4{92,642,7}   | CC1=C(C=C(Br)S1)C1=C(NC2CCOCC2)N2C<br>=CC(=CC2=N1)C(N)=O  c:8,19,21,24,t:1,3                                 | Z8837933167 | 1{92}  | NC(=O)c1c<br>cnc(N)c1    | 2{642} | Cc1sc(Br)cc1<br>C=O               | 3{7}  | [C-]<br>]#[N+]C1CC<br>OCC1           | 64.4 | 55 |
| 1275 | 4{439,164,12} | CN1N=C(C2=C1CCOC2)C1=C(NCC2CCOC2<br>)N2C=CC=C(OCC3=CC=CC=C3)C2=N1<br> c:2,4,12,23,31,33,37,t:25,29           | Z8878918613 | 1{439} | Nc1ncccc1<br>OCc2cccc2   | 2{164} | Cn1nc(C=O)<br>c2COCCc21           | 3{12} | [C-]<br>]#[N+]CC1C<br>COC1           | 67.9 | 55 |
| 1276 | 4{125,643,7}  | CC1=C(Br)C=C(O1)C1=C(NC2CCOCC2)N2C<br>=C(CCO)C=CC2=N1  c:1,4,8,24,27,t:19                                    | Z8873685294 | 1{125} | Nc1ccc(CC<br>O)cn1       | 2{643} | Cc1oc(C=O)<br>cc1Br               | 3{7}  | [C-]<br>]#[N+]C1CC<br>OCC1           | 62.1 | 55 |
| 1277 | 4{50,644,7}   | CP(C)(=O)C1=CC=CC2=NC(=C(NC3CCOCC<br>3)N12)C1=CC(F)=C(OCC#C)C=C1<br> c:6,32,t:4,8,10,23,26                   | Z8878918412 | 1{50}  | CP(=O)(C)c<br>1cccc(N)n1 | 2{644} | Fc1cc(C=O)c<br>cc1OCC#C           | 3{7}  | [C-]<br>]#[N+]C1CC<br>OCC1           | 65.2 | 55 |
| 1278 | 4{105,382,50} | COC(C)(C)CC1=C(NC2=CC3=C(OCCO3)C=<br>C2)N2C(C=CC=C2C(N)=O)=N1<br> c:6,18,23,25,30,t:9,11                     | Z8878918605 | 1{105} | NC(=O)c1c<br>ccc(N)n1    | 2{382} | COC(C)(C)C<br>C=O                 | 3{50} | [C-]<br>]#[N+]c1ccc<br>2OCCOc2c1     | 58.5 | 55 |
| 1279 | 4{267,353,23} | COC(=O)CCC(NC1=C(N=C2C=CC=C(C#C)N<br>12)C1=C(CF)C=CC=C1)C(=O)OC<br> c:12,21,25,27,t:8,10,14                  | Z8878918888 | 1{267} | Nc1cccc(C#<br>C)n1       | 2{353} | FCc1cccc1<br>C=O                  | 3{23} | COC(=O)CC<br>C([N+]#[C-<br>])C(=O)OC | 62.4 | 55 |

|      |               |                                                                                                  |             |        |                                   |        |                                  |       |                                                                      |      |    |
|------|---------------|--------------------------------------------------------------------------------------------------|-------------|--------|-----------------------------------|--------|----------------------------------|-------|----------------------------------------------------------------------|------|----|
| 1280 | 4{66,299,22}  | COCCC1=CC2=NC(=C(NC3COC3)N2C=C1)C1=C(OC)C(OC)=CC=C1F<br> c:18,21,27,29,t:4,6,8                   | Z8873684894 | 1{66}  | COCCc1ccn<br>c(N)c1               | 2{299} | COc1ccc(F)c<br>(C=O)c1OC         | 3{22} | [C-]<br>#[N+]C1CO<br>C1                                              | 59.0 | 54 |
| 1281 | 4{405,535,23} | COC(=O)CCC(NC1=C(N=C2C=CC(=CN12)N1CCCC1=O)C1=NOC(=C1)C(C)(C)O)C(=O)OC<br> c:12,14,29,t:8,10,26   | Z8835022904 | 1{405} | Nc1ccc(cn1)<br>)N2CCCC2<br>=O     | 2{535} | CC(C)(O)c1c<br>c(C=O)no1         | 3{23} | COC(=O)CC<br>C([N+]#[C-])<br>C(=O)OC                                 | 73.4 | 54 |
| 1282 | 4{125,645,36} | COC(=O)[C@@H]1CC(CN1C(=O)OC(C)(C)C)NC1=C(N=C2C=CC(CCO)=CN12)C1=CCN=N1<br> c:22,27,35,t:18,20,32  | Z8873685427 | 1{125} | Nc1ccc(CC<br>O)cn1                | 2{645} | O=Cc1c[nH]<br>nn1                | 3{36} | COC(=O)[C<br>@@H]1C[C<br>@@H](CN1<br>C(=O)OC(C)<br>(C)C)[N+]#<br>C-] | 69.3 | 54 |
| 1283 | 4{62,49,13}   | COC1=CC=C(CNC2=C(N=C3C=C(CO)C=CN23)C2=CCN=C2C)C=C1<br> c:16,24,28,t:2,4,8,10,12,21               | Z8873685386 | 1{62}  | Nc1cc(CO)c<br>cn1                 | 2{49}  | Cc1n[nH]cc1<br>C=O               | 3{13} | COc1ccc(C[<br>N+]#[C-])cc1                                           | 53.4 | 54 |
| 1284 | 4{377,622,12} | CCNC(=O)COC1=CC=C(C=C1)C1=C(NCC2COC2)N2C=CC=C(OCC(F)F)C2=N1<br> c:9,11,14,25,35,t:7,27           | Z8873684829 | 1{377} | Nc1ncccc1<br>OCC(F)F              | 2{622} | CCNC(=O)C<br>Oc1ccc(C=O<br>)cc1  | 3{12} | [C-]<br>#[N+]CC1C<br>COC1                                            | 69.7 | 54 |
| 1285 | 4{69,646,12}  | CNC(=O)C1=CC2=NC(=C(NCC3CCOC3)N2C=C1)C1=CNC(=N1)C1=CC=CC=C1<br> c:20,26,31,33,t:4,6,8,23,29      | Z8854581158 | 1{69}  | CNC(=O)c1<br>ccnc(N)c1            | 2{646} | O=Cc1c[nH]<br>c(n1)c2cccc<br>2   | 3{12} | [C-]<br>#[N+]CC1C<br>COC1                                            | 61.1 | 54 |
| 1286 | 4{353,123,53} | CC1=NC=C(N=C1)C1=C(NCCOCC2=CC=CC=C2)N2C=C(NS(C)(=O)=O)C=CC2=N1<br> c:3,5,8,17,19,30,33,t:1,15,23 | Z8878918609 | 1{353} | Cl.CS(=O)(<br>=O)Nc1ccc(<br>N)nc1 | 2{123} | Cc1nc(C=O<br>)cn1                | 3{53} | [C-]<br>#[N+]CCOC<br>c1cccc1                                         | 66.3 | 54 |
| 1287 | 4{193,647,10} | CNC(=O)C1=CN2C(C=C1)=NC(=C2NC1CCO)C1)C1=CC2=C(OC=C2)C=C1<br> c:8,10,12,27,30,t:4,22,24           | Z8878918315 | 1{193} | CNC(=O)c1<br>ccc(N)nc1            | 2{647} | O=Cc1ccc2o<br>ccc2c1             | 3{10} | [C-]<br>#[N+]C1CC<br>OC1                                             | 55.2 | 54 |
| 1288 | 4{400,648,22} | CCC(CC1=C(NC2COC2)N2C=C(COC(C)C)C=CC2=N1)NC(=O)OC(C)(C)C<br> c:4,20,23,t:13                      | Z8878918564 | 1{400} | CC(C)OCc1<br>ccc(N)nc1            | 2{648} | CCC(CC=O)<br>NC(=O)OC(<br>C)(C)C | 3{22} | [C-]<br>#[N+]C1CO<br>C1                                              | 60.4 | 54 |
| 1289 | 4{440,649,10} | CN1N=C(C=C1)C1=C(NC2CCOC2)N2C(C=C)C=C2C1=N1)C(F)F<br> c:2,4,7,18,20,23                           | Z8855739124 | 1{440} | Nc1cccc(Cl)<br>n1                 | 2{649} | Cn1nc(cc1C<br>=O)C(F)F           | 3{10} | [C-]<br>#[N+]C1CC<br>OC1                                             | 53.8 | 54 |
| 1290 | 4{129,110,29} | CCOC(=O)CCNC1=C(N=C2C=CC=C(SC)N12)C1=CN=C(C=C1)P(C)(C)=O<br> c:12,23,25,t:8,10,14,21             | Z8873685433 | 1{129} | CSc1cccc(N)<br>n1                 | 2{110} | CP(=O)(C)c1<br>ccc(C=O)cn1       | 3{29} | CCOC(=O)C<br>C[N+]#[C-]                                              | 63.3 | 54 |

|      |               |                                                                                                   |             |        |                       |        |                                |       |                         |      |    |
|------|---------------|---------------------------------------------------------------------------------------------------|-------------|--------|-----------------------|--------|--------------------------------|-------|-------------------------|------|----|
| 1291 | 4{49,94,20}   | COC1=CC(C)=C(NC2=C(N=C3C=CC=C(CO)N23)C2=NC=CN=C2)C=C1<br> c:12,23,25,28,t:2,5,8,10,14,21          | Z8878918384 | 1{49}  | Ne1cccc(CO)n1         | 2{94}  | O=Cc1cncn1                     | 3{20} | COc1ccc([N+][C-])c(C)c1 | 52.9 | 54 |
| 1292 | 4{378,650,12} | C(NC1=C(N=C2N1C=CC=C2OCC1=CN=CC=C1)C1=CC2=C(CCOC2)C=C1)C1CCOC1<br> c:4,8,10,17,19,31,t:2,15,22,24 | Z8878918324 | 1{378} | Ne1ncccc1OCc2ccnc2    | 2{650} | O=Cc1ccc2COCc2c1               | 3{12} | [C-][N+]CC1COC1         | 66.8 | 54 |
| 1293 | 4{41,651,14}  | COCCNC1=C(N=C2C=NC(C)=CN12)C1=C(C)OC(C)=C1  c:9,12,17,22,t:5,7                                    | Z8846492117 | 1{41}  | Cc1cnc(N)c1           | 2{651} | Cc1cc(C=O)c(C)o1               | 3{14} | COCC[N+][C-]            | 43.9 | 54 |
| 1294 | 4{79,116,13}  | COC1=CC=C(CNC2=C(N=C3C=NC=C(C)N23)C2=CN(CCC=C)N=N2)C=C1<br> c:12,27,30,t:2,4,8,10,14,20           | Z8878918467 | 1{79}  | Cc1cnc(N)n1           | 2{116} | C=CCcn1cc(C=O)nn1              | 3{13} | COc1ccc(C[N+][C-])cc1   | 56.8 | 54 |
| 1295 | 4{441,534,7}  | CC(C)N1C=CC(=N1)C1=C(NC2CCOCC2)N2C=C(F)C(=CC2=N1)C(C)(F)F<br> c:4,6,9,23,26,t:20                  | Z8878918385 | 1{441} | CC(F)(F)c1cc(N)ccc1F  | 2{534} | CC(C)n1ccc(C=O)n1              | 3{7}  | [C-][N+]C1CCOCC1        | 59.4 | 54 |
| 1296 | 4{153,575,15} | CCNC1=C(CC(NC(=O)OC(C)(C)C(F)(F)F)N=C2C=CC=C(N12)C(C)(C)O  c:3,21,23,t:19                         | Z8873684649 | 1{153} | CC(C)(O)c1cccc(N)n1   | 2{575} | CC(C)(C)OC(=O)NC(CC=O)C(F)(F)F | 3{15} | CC[N+][C-]              | 62.7 | 54 |
| 1297 | 4{50,11,7}    | CP(C)(=O)C1=CC=CC2=NC(=C(NC3CCOCC3)N12)C1=NN(CC(F)(F)F)C=C1<br> c:6,31,t:4,8,10,23                | Z8878918428 | 1{50}  | CP(=O)(C)c1cccc(N)n1  | 2{11}  | FC(F)(F)Cn1ccc(C=O)n1          | 3{7}  | [C-][N+]C1CCOCC1        | 64.3 | 54 |
| 1298 | 4{28,11,7}    | FC(F)(F)CN1C=CC(=N1)C1=C(NC2CCOCC2)N2C=CC(=CC2=N1)C1=NOC=N1<br> c:6,8,11,22,24,27,33,t:30         | Z8849597824 | 1{28}  | Cl.Nc1cc(ccn1)c2ncon2 | 2{11}  | FC(F)(F)Cn1ccc(C=O)n1          | 3{7}  | [C-][N+]C1CCOCC1        | 63.0 | 54 |
| 1299 | 4{35,420,13}  | COC1=CC=C(CNC2=C(CC(C)(C)C#N)N=C3C=CC(C)=CN23)C=C1  c:8,18,21,26,t:2,4,16                         | Z8837933159 | 1{35}  | Cc1ccc(N)nc1          | 2{420} | CC(C)(CC=O)C#N                 | 3{13} | COc1ccc(C[N+][C-])cc1   | 50.6 | 54 |
| 1300 | 4{50,652,31}  | CSCCNC1=C(N=C2C=CC=C(N12)P(C)(C)=O)C1=CSC2=C1C(F)=CC=C2<br> c:9,11,23,27,29,t:5,7,20              | Z8878918839 | 1{50}  | CP(=O)(C)c1cccc(N)n1  | 2{652} | Fe1cccc2ccc(C=O)c12            | 3{31} | CSCC[N+][C-]            | 62.8 | 54 |
| 1301 | 4{362,497,10} | CCN1N=CC(C)=C1C1=C(NC2CCOCC2)N2C(C)=CC=C2C(=O)NC)=N1  c:3,6,9,20,22,28                            | Z8855619571 | 1{362} | CNC(=O)c1cccc(N)n1    | 2{497} | CCn1ccc(C)c1C=O                | 3{10} | [C-][N+]C1CCOC1         | 53.1 | 53 |
| 1302 | 4{104,144,46} | CC(=C)CNC1=C(N=C2C=CC3=C(COCC3)N12)C1=NOC(=C1)C1CC1  c:9,24,t:5,7,11,21                           | Z8829498719 | 1{104} | Ne1ccc2CCOCc2n1       | 2{144} | O=Cc1cc(on1)C2CC2              | 3{46} | CC(=C)C[N+][C-]         | 50.4 | 53 |

|      |               |                                                                                                            |             |        |                       |        |                          |       |                             |      |    |
|------|---------------|------------------------------------------------------------------------------------------------------------|-------------|--------|-----------------------|--------|--------------------------|-------|-----------------------------|------|----|
| 1303 | 4{46,181,13}  | COC1=CC=C(CNC2=C(N=C3C=CC=CN23)C2=CN=C3CCCN23)C=C1<br> c:12,14,29,t:2,4,8,10,19,21                         | Z8829498470 | 1{46}  | Nc1ccccn1             | 2{181} | O=Cc1cnc2CCn12           | 3{13} | COc1cccc([N+]#[C-])c1       | 51.7 | 53 |
| 1304 | 4{77,653,23}  | COC(=O)CCC(NC1=C(N=C2C=CC(=CN12)C1=CN=CC=C1)C1C2CCC(F)(F)C12)C(=O)OC<br> c:12,14,21,23,t:8,10,19           | Z8835022901 | 1{77}  | Nc1ccc(cn1)c2ccccc2   | 2{653} | FC1(F)CCC2C(C=O)C21      | 3{23} | COC(=O)CC([N+]#[C-])C(=O)OC | 69.6 | 53 |
| 1305 | 4{367,600,34} | CC1=CN2C(NCC3CCCO3)=C(N=C2C(=C1)C#C)C1=CN(CCS(C)(=O)=O)N=C1<br> c:12,14,17,31,t:1,22                       | Z8873685409 | 1{367} | Cc1cnc(N)c(C#C)c1     | 2{600} | CS(=O)(=O)CCn1cc(C=O)cn1 | 3{34} | [C-]#[N+]CC1COCO1           | 61.4 | 53 |
| 1306 | 4{164,596,24} | COC1=CC(CNC2=C(N=C3C=C(CN(C)C)C=C N23)C2=CC3=C(N=C2)N(C)N=C3C)=CC=C1<br> c:17,24,26,31,34,36,t:2,7,9,11,22 | Z8873684817 | 1{164} | CN(C)Cc1cnc(N)c1      | 2{596} | Cc1nn(C)c2ncc(C=O)cc12   | 3{24} | COc1cccc([N+]#[C-])c1       | 65.4 | 53 |
| 1307 | 4{50,374,26}  | CP(C)(=O)C1=CC=CC2=NC(C3=CN(CC4CC4)N=N3)=C(NCC3=CC=C(F)C=C3)N12<br> c:6,19,30,t:4,8,11,21,25,27            | Z8846492347 | 1{50}  | CP(=O)(C)c1cccc(N)n1  | 2{374} | O=Cc1cn(CC2CC2)nn1       | 3{26} | Fc1ccc(C[N+]#[C-])c1        | 62.6 | 53 |
| 1308 | 4{372,6,12}   | CC1=C(C2=C(NCC3CCOC3)N3C=CC=C(OC C4=CC=NC=C4)C3=N2)C(C)=NC=C1<br> c:1,3,14,22,24,28,32,34,t:16,20          | Z8878918442 | 1{372} | Nc1ncccc1OCc2ccccc2   | 2{6}   | Cc1ccnc(C)c1C=O          | 3{12} | [C-]#[N+]CC1COCO1           | 61.3 | 53 |
| 1309 | 4{107,334,24} | COC1=CC(CNC2=C(N=C3C=CC(OCCO)=CN23)C2=C(C)OC=N2)=CC=C1<br> c:11,17,22,26,28,30,t:2,7,9                     | Z8846491955 | 1{107} | Nc1ccc(OC CO)cn1      | 2{334} | Cc1ocnc1C=O              | 3{24} | COc1cccc([N+]#[C-])c1       | 56.3 | 53 |
| 1310 | 4{142,596,21} | CN1N=C(C)C2=C1N=CC(=C2)C1=C(NCC2C C2)N2C=CC=C(OCCS(C)(=O)=O)C2=N1<br> c:5,8,10,13,22,34,t:2,24             | Z8878918663 | 1{142} | CS(=O)(=O)CCOc1cccn1N | 2{596} | Cc1nn(C)c2ncc(C=O)cc12   | 3{21} | [C-]#[N+]CC1CC1             | 64.9 | 53 |
| 1311 | 4{105,654,50} | NC(=O)C1=CC=CC2=NC(CCC3=CN=CO3)=C(NC3=CC4=C(OCCO4)C=C3)N12<br> c:5,14,29,t:3,7,12,17,20,22                 | Z8873684669 | 1{105} | NC(=O)c1cccc(N)n1     | 2{654} | O=CCCc1cnco1             | 3{50} | [C-]#[N+]c1cccc2OCCO2c1     | 57.8 | 53 |
| 1312 | 4{193,655,12} | CNC(=O)C1=CN2C(NCC3CCOC3)=C(N=C2 C=C1)C1=C(Cl)C=CC=C1F<br> c:15,17,20,23,26,28,t:4                         | Z8855739170 | 1{193} | CNC(=O)c1cccc(N)nc1   | 2{655} | Fc1cccc(Cl)c1C=O         | 3{12} | [C-]#[N+]CC1COCO1           | 57.4 | 53 |
| 1313 | 4{103,656,59} | CC1=NC(=C(C)S1)C1=C(NCCC2=CC(F)=CC= C2)N2C(C=NC=C2CO)=N1<br> c:8,16,18,23,25,29,t:1,3,13                   | Z8878918303 | 1{103} | Nc1cnc(C O)n1         | 2{656} | Cc1nc(C=O)c(C)s1         | 3{59} | Fc1cccc(CC[N+]#[C-])c1      | 56.6 | 53 |
| 1314 | 4{73,69,11}   | CN1N=C(C=C1C)C1=C(NCC2=CC(Br)=CC=C2)N2N3C=CN=C3C=CC2=N1<br> c:2,4,8,15,17,22,24,27,30,t:12                 | Z8878918812 | 1{73}  | Nc1ccc2ccn2n1         | 2{69}  | Cc1cc(C=O)nn1C           | 3{11} | Br1cccc([N+]#[C-])c1        | 62.1 | 53 |

|      |               |                                                                                                              |             |        |                                   |        |                                      |       |                                                |      |    |
|------|---------------|--------------------------------------------------------------------------------------------------------------|-------------|--------|-----------------------------------|--------|--------------------------------------|-------|------------------------------------------------|------|----|
| 1315 | 4{442,294,5}  | COCNC1=C(N=C2N1C=C(Cl)C=C2C)C1=C(OC)C(=O)C=CO1  c:8,15,19,25,t:6,12                                          | Z8878918660 | 1{442} | Cc1cc(Cl)cn<br>c1N                | 2{294} | COc1c(C=O)<br>occc1=O                | 3{5}  | COCNC1=C(N=C2N1C=C(Cl)C=C2C)C1=C(OC)C(=O)C=CO1 | 53.7 | 53 |
| 1316 | 4{50,153,7}   | CP(C)(=O)C1=CC=CC2=NC(=C(NC3CCOCC3)N12)C1=CN(CC(F)(F)F)N=N1  c:6,31,t:4,8,10,23                              | Z8873684656 | 1{50}  | CP(=O)(C)c<br>1cccc(N)n1          | 2{153} | FC(F)(F)Cn1<br>cc(C=O)nn1            | 3{7}  | [C-]<br>#[N+]C1CC<br>OCC1                      | 62.8 | 53 |
| 1317 | 4{50,639,26}  | CC1=NN=C(O1)C1=CC(=CC=C1)C1=C(NCC2=CC=C(F)C=C2)N2C(C=CC=C2P(C)(C)=O)=N1  c:3,9,11,14,23,28,30,36,t:1,7,18,20 | Z8873685338 | 1{50}  | CP(=O)(C)c<br>1cccc(N)n1          | 2{639} | Cc1nnc(o1)c<br>2cccc(C=O)c<br>2      | 3{26} | Fe1ccc(C[N+]<br>#[C-])cc1                      | 67.5 | 53 |
| 1318 | 4{353,273,31} | CSCNC1=C(N=C2C=CC(NS(C)(=O)=O)=C<br>N12)C1=C(Br)N(C)N=C1C  c:9,16,21,26,t:5,7                                | Z8835022896 | 1{353} | Cl.CS(=O)(<br>=O)Nc1ccc(<br>N)nc1 | 2{273} | Cc1nn(C)c(B<br>r)c1C=O               | 3{31} | CSCC[N+]#[<br>C-]                              | 67.2 | 53 |
| 1319 | 4{92,441,7}   | CCC(C)C(OC)C1=C(NC2CCOCC2)N2C=CC(=CC2=N1)C(N)=O  c:7,18,20,23                                                | Z8873684751 | 1{92}  | NC(=O)c1c<br>cnc(N)c1             | 2{441} | CCC(C)C(O<br>C)C=O                   | 3{7}  | [C-]<br>#[N+]C1CC<br>OCC1                      | 51.1 | 52 |
| 1320 | 4{73,607,11}  | CC(C)(C)N1C=C(C=N1)C1=C(NCC2=CC(Br)=CC=C2)N2N3C=CN=C3C=CC2=N1  c:5,7,10,17,19,24,26,29,32,t:14               | Z8829498713 | 1{73}  | Nc1ccc2ncc<br>n2n1                | 2{607} | CC(C)(C)n1c<br>c(C=O)cn1             | 3{11} | Br1cccc(C[<br>N+]#[C-])c1                      | 65.7 | 52 |
| 1321 | 4{357,657,49} | CC(C)N1C=C(C(C)=N1)C1=C(NC2CC(F)(F)C2)N2C=C(C=CC2=N1)N1CCC(CO)CC1  c:4,7,10,21,23,26                         | Z8873685401 | 1{357} | Nc1ccc(en1<br>)N2CCC(C<br>O)CC2   | 2{657} | CC(C)n1cc(C<br>=O)c(C)n1             | 3{49} | FC1(F)CC(C<br>1)[N+]#[C-]                      | 64.8 | 52 |
| 1322 | 4{362,658,21} | CNC(=O)C1=CC=CC2=NC(C3=CN=C(CNC(=O)OC(C)(C)C)S3)=C(NCC3CC3)N12  c:6,t:4,8,11,13,25                           | Z8878918429 | 1{362} | CNC(=O)c1<br>cccc(N)n1            | 2{658} | CC(C)(C)OC<br>(=O)NCc1nc<br>c(C=O)s1 | 3{21} | [C-]<br>#[N+]CC1C<br>C1                        | 64.5 | 52 |
| 1323 | 4{50,659,6}   | CCOC(=O)CCNC1=C(N=C2C=CC=C(N12)P(C)(C)=O)C1=CC=CC2=NN(C)C=C12  c:13,15,26,t:9,11,24,28,32                    | Z8835022890 | 1{50}  | CP(=O)(C)c<br>1cccc(N)n1          | 2{659} | Cn1cc2c(C=<br>O)cccc2n1              | 3{6}  | CCOC(=O)C<br>CC[N+]#[C-]                       | 64.0 | 52 |
| 1324 | 4{69,660,10}  | CNC(=O)C1=CC2=NC(=C(NC3CCOC3)N2C=C1)C1=NSC=C1  c:19,25,t:4,6,8,22                                            | Z8873684835 | 1{69}  | CNC(=O)c1<br>ccnc(N)c1            | 2{660} | O=Cc1ccsn1                           | 3{10} | [C-]<br>#[N+]C1CC<br>OC1                       | 48.4 | 52 |
| 1325 | 4{32,308,31}  | CSCNC1=C(CCC2CCCC2)N=C2C=C(C=CN12)P(C)(C)=O  c:5,17,19,t:15                                                  | Z8873685265 | 1{32}  | CP(=O)(C)c<br>1ccnc(N)c1          | 2{308} | O=CCCC1C<br>CCC1                     | 3{31} | CSCC[N+]#[<br>C-]                              | 53.5 | 52 |
| 1326 | 4{443,135,49} | CN1N=C(C)C(=C1C)C1=C(NC2CC(F)(F)C2)N2C=C(Br)C(Cl)=CC2=N1  c:5,9,24,27,t:2,20                                 | Z8878918557 | 1{443} | Nc1cc(Cl)c(<br>Br)cn1             | 2{135} | Cc1nn(C)c(C<br>)c1C=O                | 3{49} | FC1(F)CC(C<br>1)[N+]#[C-]                      | 62.6 | 52 |

|      |               |                                                                                                             |             |        |                                      |        |                            |       |                                   |      |    |
|------|---------------|-------------------------------------------------------------------------------------------------------------|-------------|--------|--------------------------------------|--------|----------------------------|-------|-----------------------------------|------|----|
| 1327 | 4{444,326,10} | CN1N=CC=C1C1=C(NC2CCOC2)N2C=C3CC<br>CCC3=CC2=N1  c:2,4,7,24,27,t:17                                         | Z8878918320 | 1{444} | Nc1cc2CCC<br>Cc2cn1                  | 2{326} | Cn1ncce1C=<br>O            | 3{10} | [C-<br>]#[N+]C1CC<br>OC1          | 47.5 | 52 |
| 1328 | 4{121,314,10} | BrC1=CC2=NC(C3=CN=C3)=C(NC3CCOC<br>3)N2C=C1  c:9,22,t:1,3,6,11                                              | Z8855619525 | 1{121} | Nc1cc(Br)c<br>cn1                    | 2{314} | O=Cc1cn[nH<br>]c1          | 3{10} | [C-<br>]#[N+]C1CC<br>OC1          | 49.0 | 52 |
| 1329 | 4{153,61,35}  | CSCCNC1=C(N=C2C=CC=C(N12)C(C)(C)O<br>)C1=CC=C(C=C1)S(C)=O<br> c:10,12,23,25,t:6,8,21                        | Z8873685333 | 1{153} | CC(C)(O)c1<br>cccc(N)n1              | 2{61}  | CS(=O)c1ccc<br>(C=O)cc1    | 3{35} | CSCCC[N+]<br>#[C-]                | 58.7 | 52 |
| 1330 | 4{153,437,15} | CCNC1=C(N=C2C=CC=C(N12)C(C)(C)O)C1<br>=CN(CC)N=C1C  c:7,9,23,t:3,5,18                                       | Z8873684807 | 1{153} | CC(C)(O)c1<br>cccc(N)n1              | 2{437} | CCn1cc(C=O<br>)c(C)n1      | 3{15} | CC[N+]#[C-]                       | 46.0 | 52 |
| 1331 | 4{311,169,10} | FC1=CC2=NC(=C(NC3CCOC3)N2C=C1)C1=<br>NNC2=C1N=CC=C2  c:16,22,25,27,t:1,3,5,19                               | Z8873685463 | 1{311} | Nc1cc(F)cc<br>n1                     | 2{169} | O=Cc1n[nH]<br>c2ccnc12     | 3{10} | [C-<br>]#[N+]C1CC<br>OC1          | 47.6 | 52 |
| 1332 | 4{32,356,18}  | CC(C)CN1C=C(N=N1)C1=C(NC(C)(C)C)N2C<br>=CC(=CC2=N1)P(C)(C)=O  c:5,7,10,18,20,23                             | Z8878918506 | 1{32}  | CP(=O)(C)c<br>1ccnc(N)c1             | 2{356} | CC(C)Cn1cc<br>(C=O)nn1     | 3{18} | CC(C)(C)[N<br>+]#[C-]             | 54.6 | 52 |
| 1333 | 4{362,291,10} | CNC(=O)C1=CC=CC2=NC(=C(NC3CCOC3)<br>N12)C1=C(C)C(OC)=CN=C1<br> c:6,22,27,29,t:4,8,10                        | Z8873684583 | 1{362} | CNC(=O)c1<br>cccc(N)n1               | 2{291} | COc1ncce(C<br>=O)c1C       | 3{10} | [C-<br>]#[N+]C1CC<br>OC1          | 53.4 | 52 |
| 1334 | 4{186,630,69} | COCCN1C=C(C=N1)C1=C(NC2=C(OC)C=C<br>C=C2)N2C=CC(=CC2=N1)S(=O)(=O)N(C)C<br> c:5,7,10,13,17,19,23,25,28       | Z8878918547 | 1{186} | Cl.CN(C)S<br>(=O)(=O)c1c<br>cnc(N)c1 | 2{630} | COCCn1cc<br>(C=O)en1       | 3{69} | COc1cccc[<br>N+]#[C-]             | 65.8 | 52 |
| 1335 | 4{120,661,62} | COC(=O)C1(CCCC1)NC1=C(N=C2C=C(C=C<br>N12)C1=CN(C)N=C1)C1=CN(CC(F)(F)F)N=C<br>1  c:15,17,26,37,t:11,13,22,29 | Z8837933168 | 1{120} | Cn1cc(en1)<br>c2ccnc(N)c<br>2        | 2{661} | FC(F)(F)Cn1<br>cc(C=O)en1  | 3{62} | COC(=O)C1(<br>CCCC1)[N+]<br>#[C-] | 68.2 | 52 |
| 1336 | 4{48,437,15}  | CCNC1=C(N=C2C=C(C=CN12)S(C)(=O)=O)<br>C1=CN(CC)N=C1C  c:7,9,23,t:3,5,18                                     | Z8878918641 | 1{48}  | CS(=O)(=O)<br>c1ccnc(N)c<br>1        | 2{437} | CCn1cc(C=O<br>)c(C)n1      | 3{15} | CC[N+]#[C-]                       | 48.6 | 52 |
| 1337 | 4{387,446,39} | CCOCCNC1=C(N=C2N1C=CC=C2OC(F)F)C<br>1=CC(=CC=C1)C(=O)NC<br> c:8,12,14,23,25,t:6,21                          | Z8878918827 | 1{387} | Nc1ncce1<br>OC(F)F                   | 2{446} | CNC(=O)c1c<br>ccc(C=O)c1   | 3{39} | CCOCC[N+]<br>#[C-]                | 59.4 | 52 |
| 1338 | 4{142,662,10} | CP(C)(=O)C1=CC(=CC=C1)C1=C(NC2CCOC<br>2)N2C=CC=C(OCCS(C)(=O)=O)C2=N1<br> c:6,8,11,21,33,t:4,23              | Z8878918611 | 1{142} | CS(=O)(=O)<br>)CCOc1ccc<br>nc1N      | 2{662} | CP(=O)(C)c1<br>cccc(C=O)c1 | 3{10} | [C-<br>]#[N+]C1CC<br>OC1          | 66.8 | 52 |
| 1339 | 4{141,60,35}  | CSCCNC1=C(N=C2C=C(NC(C)=O)C=CN12<br>)C(C)C1CCOC1  c:16,t:6,8,10                                             | Z8878918520 | 1{141} | CC(=O)Nc1<br>ccnc(N)c1               | 2{60}  | CC(C=O)C1<br>CCOC1         | 3{35} | CSCCC[N+]<br>#[C-]                | 52.6 | 52 |

|      |               |                                                                                                        |             |        |                         |        |                         |       |                              |      |    |
|------|---------------|--------------------------------------------------------------------------------------------------------|-------------|--------|-------------------------|--------|-------------------------|-------|------------------------------|------|----|
| 1340 | 4{154,663,37} | COC(=O)C1CC(C1)NC1=C(N=C2C=C(C=CN12)[N+](O-))=O)C1=CC(OCC(N)=O)=C(OC)C=C1<br> c:14,16,35,t:10,12,24,31 | Z8873684657 | 1{154} | Nc1cc(cen1)[N+](=O)[O-] | 2{663} | COc1ccc(C=O)cc1OCC(=O)N | 3{37} | COC(=O)C1CC(C1)[N+]#[C-]     | 65.6 | 52 |
| 1341 | 4{49,370,13}  | CNC(=O)C1=CC=C(C=C1)C1=C(NCC2=CC=C(OC)C=C2)N2C(C=CC=C2CO)=N1<br> c:6,8,11,21,26,28,32,t:4,15,17        | Z8873684755 | 1{49}  | Nc1cccc(CO)n1           | 2{370} | CNC(=O)c1ccc(C=O)cc1    | 3{13} | COc1ccc(C[N+]#[C-])cc1       | 58.1 | 52 |
| 1342 | 4{351,67,44}  | CC(C)(C)OC(=O)NCCCCNC1=C(N=C2C=CC3=C(C(O)CC3)N12)C1CCCSC1<br> c:17,t:13,15,19                          | Z8878918545 | 1{351} | Nc1ccc2CC(CO)c2n1       | 2{67}  | O=CC1CCCSC1             | 3{44} | CC(C)(C)OC(=O)NCCCC[N+]#[C-] | 64.2 | 52 |
| 1343 | 4{127,664,34} | COC1=C(OC)C(=CC=C1)C1=C(NCC2CCCO2)N2C=CC=C(F)C2=N1  c:2,6,8,11,22,28,t:24                              | Z8878918847 | 1{127} | Nc1ncccc1F              | 2{664} | COc1cccc(C=O)c1OC       | 3{34} | [C-]#[N+]CC1COCO1            | 51.7 | 52 |
| 1344 | 4{412,291,10} | COC1=C(C)C(=CN=C1)C1=C(NC2CCOC2)N2C=C(Br)C(CO)=CC2=N1<br> c:2,5,7,10,25,28,t:20                        | Z8878918318 | 1{412} | Nc1cc(CO)c(Br)cn1       | 2{291} | COc1nccc(C=O)c1C        | 3{10} | [C-]#[N+]C1CCOC1             | 60.2 | 51 |
| 1345 | 4{35,307,9}   | CNC1=C(N=C2C=CC(C)=CN12)C1=CN=C(C1)N1C  c:6,9,t:2,4,14,16                                              | Z8855619567 | 1{35}  | Cc1ccc(N)nc1            | 2{307} | Cn1c(Cl)ncc1C=O         | 3{9}  | C[N+]#[C-]                   | 38.2 | 51 |
| 1346 | 4{146,665,46} | CN1N=NC(=C1C)C1=C(NCC(C)=C)N2C=C(C=CC2=N1)S(C)(=O)=O  c:2,4,8,16,18,21                                 | Z8873684789 | 1{146} | CS(=O)(=O)c1ccc(N)nc1   | 2{665} | Cc1c(C=O)nn1C           | 3{46} | CC(=C)C[N+]#[C-]             | 49.9 | 51 |
| 1347 | 4{166,666,22} | COC1=C(OC)C=C(C2=C(NC3COC3)N3C=CC(CSCCO)=CC3=N2)C(F)=C1<br> c:2,8,17,24,27,31,t:6                      | Z8878918601 | 1{166} | Nc1cc(CSCCO)cn1         | 2{666} | COc1cc(F)c(C=O)cc1OC    | 3{22} | [C-]#[N+]C1COC1              | 56.1 | 51 |
| 1348 | 4{366,567,12} | COC1=CC=CN2C(NCC3CCOC3)=C(N=C12)C1=C2CCCC2=NN1C  c:4,15,21,27,t:2,17                                   | Z8878918600 | 1{366} | COc1cccnc1N             | 2{567} | Cn1nc2CCCc2c1C=O        | 3{12} | [C-]#[N+]CC1COC1             | 50.8 | 51 |
| 1349 | 4{62,49,11}   | CC1=NNC=C1C1=C(NCC2=CC(Br)=CC=C2)N2C=CC(CO)=CC2=N1<br> c:4,7,14,16,20,24,27,t:1,11                     | Z8878918555 | 1{62}  | Nc1cc(CO)cn1            | 2{49}  | Cc1n[nH]cc1C=O          | 3{11} | Brc1cccc(C[N+]#[C-])c1       | 57.0 | 51 |
| 1350 | 4{32,356,7}   | CC(C)CN1C=C(N=N1)C1=C(NC2CCOCC2)N2C=CC(=CC2=N1)P(C)(C)=O<br> c:5,7,10,21,23,26                         | Z8878918404 | 1{32}  | CP(=O)(C)c1ccnc(N)c1    | 2{356} | CC(C)Cn1ccc(C=O)nn1     | 3{7}  | [C-]#[N+]C1CCOCC1            | 57.5 | 51 |
| 1351 | 4{142,567,10} | CN1N=C2CCCC2=C1C1=C(NC2CCOC2)N2C=CC=C(OCCS(C)(=O)=O)C2=N1<br> c:8,11,21,33,t:2,23                      | Z8873684708 | 1{142} | CS(=O)(=O)CCOc1cccnc1N  | 2{567} | Cn1nc2CCCc2c1C=O        | 3{10} | [C-]#[N+]C1CCOC1             | 61.5 | 51 |

|      |               |                                                                                                                         |             |        |                                     |        |                                             |       |                                      |      |    |
|------|---------------|-------------------------------------------------------------------------------------------------------------------------|-------------|--------|-------------------------------------|--------|---------------------------------------------|-------|--------------------------------------|------|----|
| 1352 | 4{442,42,23}  | COC(=O)CCC(NC1=C(N=C2N1C=C(Cl)C=C2C)C1=CN(C)N=C1Cl)C(=O)OC<br> c:10,17,25,t:8,14,21                                     | Z8878918525 | 1{442} | Cc1cc(Cl)en<br>c1N                  | 2{42}  | Cn1cc(C=O)<br>c(Cl)n1                       | 3{23} | COC(=O)CC<br>C([N+]#[C-<br>])C(=O)OC | 62.7 | 51 |
| 1353 | 4{230,667,29} | CCOC(=O)CCNC1=C(N=C2N1C=C(Br)C=C2C(C)O)C1=C2N=CC=CN2N=C1C<br> c:10,17,23,25,27,31,t:8,14                                | Z8878918668 | 1{230} | CC(O)c1cc(<br>Br)enc1N              | 2{667} | Cc1nn2cccnc<br>2c1C=O                       | 3{29} | CCOC(=O)C<br>C[N+]#[C-]              | 67.2 | 51 |
| 1354 | 4{103,668,5}  | COCCCN1=C(CC2CCCC(C)(C)O2)N=C2C=NC=C(CO)N12  c:6,20,t:18,22                                                             | Z8878918885 | 1{103} | Ne1cncc(C<br>O)n1                   | 2{668} | CC1(C)CCC<br>C(CC=O)O1                      | 3{5}  | COCCC[N+]<br>#[C-]                   | 50.0 | 51 |
| 1355 | 4{373,352,62} | COCCCC1=C(NC2(CCCC2)C(=O)OC)N2C=C(CNC(=O)OC(C)(C)C)C=CC2=N1<br> c:5,30,33,t:19                                          | Z8829498753 | 1{373} | CC(C)(C)O<br>C(=O)NCc1<br>ccc(N)nc1 | 2{352} | COCCCC=O                                    | 3{62} | COC(=O)C1(<br>CCCC1)[N+]<br>#[C-]    | 63.5 | 51 |
| 1356 | 4{214,536,10} | COC1=CC(Br)=C(C)N2C(NC3CCOC3)=C(N=C12)C1=CN=C(O1)C1CCOCC1<br> c:16,24,t:2,5,18,22                                       | Z8873684853 | 1{214} | COc1cc(Br)<br>c(C)nc1N              | 2{536} | O=Cc1enc(o<br>1)C2CCOCC<br>2                | 3{10} | [C-<br>]#[N+]C1CC<br>OC1             | 65.8 | 51 |
| 1357 | 4{445,320,29} | CCOC(=O)CCNC1=C(N=C2C=NC(SC)=CN12)C1=NN(C)C=N1  c:12,16,25,t:8,10,21                                                    | Z8873684837 | 1{445} | CSc1enc(N)<br>cn1                   | 2{320} | Cn1enc(C=O)<br>n1                           | 3{29} | CCOC(=O)C<br>C[N+]#[C-]              | 49.7 | 51 |
| 1358 | 4{153,277,15} | CCNC1=C(CC(NC(=O)OC(C)(C)C)C2CC2)N=C2C=CC=C(N12)C(C)(C)O  c:3,21,23,t:19                                                | Z8873684594 | 1{153} | CC(C)(O)c1<br>cccc(N)n1             | 2{277} | CC(C)(C)OC<br>(=O)NC(CC<br>=O)C1CC1         | 3{15} | CC[N+]#[C-]                          | 55.3 | 51 |
| 1359 | 4{154,669,47} | CC(C)NC1=C(N=C2C=C(C=CN12)[N+]([O-])=O)C1=C(Br)N(C)N=C1  c:8,10,18,23,t:4,6                                             | Z8855619636 | 1{154} | Ne1cc(cen1<br>)[N+](=O)[<br>O-]     | 2{669} | Cn1ncc(C=O)<br>c1Br                         | 3{47} | CC(C)[N+]#[<br>C-]                   | 52.0 | 51 |
| 1360 | 4{359,437,22} | CCN1C=C(C(C)=N1)C1=C(NC2COC2)N2C=C(OC(F)F)C=CC2=N1  c:3,6,9,24,27,t:18                                                  | Z8873684884 | 1{359} | Ne1ccc(OC(<br>F)F)cn1               | 2{437} | CCn1cc(C=O)<br>c(C)n1                       | 3{22} | [C-<br>]#[N+]C1CO<br>C1              | 49.7 | 51 |
| 1361 | 4{105,349,66} | CC(NC1=C(N=C2C=CC=C(N12)C(N)=O)C1C[C@H]2OC(C)(C)O[C@H]2C1)C1=CC=CC=C1  c:7,9,31,33,t:3,5,29                             | Z8873684852 | 1{105} | NC(=O)c1c<br>ccc(N)n1               | 2{349} | CC1(C)O[C<br>@@H]2CC(<br>C[C@@H]2<br>O1)C=O | 3{66} | CC([N+]#[C-<br>])c1cccc1             | 57.4 | 51 |
| 1362 | 4{91,670,26}  | CN(C)C(=O)C1=NN(C=C1)C1=CC=C(C=C1)C1=C(NCC2=CC=C(F)C=C2)N2C=C(C=CC2=N1)C(N)=O<br> c:8,13,15,18,27,31,33,36,t:5,11,22,24 | Z8846491744 | 1{91}  | NC(=O)c1c<br>cc(N)nc1               | 2{670} | CN(C)C(=O)<br>c1ccn(n1)c2c<br>cc(C=O)cc2    | 3{26} | Fc1ccc(C[N+]<br>#[C-])cc1            | 67.9 | 51 |



|      |               |                                                                                              |             |        |                                  |        |                                                |       |                                 |      |    |
|------|---------------|----------------------------------------------------------------------------------------------|-------------|--------|----------------------------------|--------|------------------------------------------------|-------|---------------------------------|------|----|
| 1363 | 4{446,671,38} | COCCCC=C(NC2=CC3=C(OCO3)C=C2)N2C=CC(=CC2=N1)C1=CN=CC=C1<br> c:4,15,19,21,24,29,31,t:7,9,27   | Z8878918659 | 1{446} | Nc1cc(cen1)c2cccnc2              | 2{671} | COCCCC=O                                       | 3{38} | [C-]<br>]#[N+]c1ccc<br>2OCOe2c1 | 53.0 | 51 |
| 1364 | 4{44,672,9}   | CCC1=CN2C(C=N1)=NC(=C2NC)C1=C(C)S<br>C=N1  c:6,8,10,15,19,t:2                                | Z8846491880 | 1{44}  | CCc1cnc(N)<br>cn1                | 2{672} | Cc1scnc1C=<br>O                                | 3{9}  | C[N+]#[C-]                      | 37.3 | 51 |
| 1365 | 4{356,673,34} | CN(C)C(=O)C1=C(C1)C=CC2=NC(=C(NCC3<br>CCCO3)N12)C1=NC=CC(C1)=C1<br> c:5,8,27,30,t:10,12,25   | Z8837933144 | 1{356} | CN(C)C(=O)<br>c1nc(N)ccc<br>1C1  | 2{673} | Clc1ccnc(C=<br>O)c1                            | 3{34} | [C-]<br>]#[N+]CC1C<br>CCO1      | 59.1 | 50 |
| 1366 | 4{371,350,28} | CCCNC1=C(N=C2N1C=CC=C2OCCCC#N)C<br>1C2CCOCC12  c:6,10,12,t:4                                 | Z8855739193 | 1{371} | Nc1ncccc1<br>OCCCC#N             | 2{350} | O=CC1C2C<br>COCC12                             | 3{28} | CCC[N+]#[C-]<br>]               | 48.1 | 50 |
| 1367 | 4{105,674,66} | CC(NC1=C(N=C2C=CC=C(N12)C(N)=O)C1=<br>C(C)NN=C1C1)C1=CC=CC=C1<br> c:7,9,17,21,27,29,t:3,5,25 | Z8878918771 | 1{105} | NC(=O)c1c<br>ccc(N)n1            | 2{674} | Cc1[nH]nc(C<br>l)c1C=O                         | 3{66} | CC([N+]#[C-]<br>)c1cccc1        | 53.6 | 50 |
| 1368 | 4{47,495,6}   | CCOC(=O)CCCNC1=C(N=C2C=C(C=CN12)S<br>(N)(=O)=O)C1=C(C1)C=CC=N1<br> c:13,15,24,27,29,t:9,11   | Z8855739260 | 1{47}  | Cl.Nc1cc(cc<br>n1)S(=O)(=<br>O)N | 2{495} | Clc1ccnc1C<br>=O                               | 3{6}  | CCOC(=O)C<br>CC[N+]#[C-]        | 59.4 | 50 |
| 1369 | 4{447,675,49} | CN(C)C1=CN2C(C=C1)=NC(C1COCCN1C(=<br>O)OC(C)(C)C)=C2NC1CC(F)(F)C1<br> c:7,9,25,t:3           | Z8846492240 | 1{447} | CN(C)c1ccc<br>(N)nc1             | 2{675} | CC(C)(C)OC<br>(=O)N1CCO<br>CC1C=O              | 3{49} | FC1(F)CC(C<br>1)[N+]#[C-]       | 61.3 | 50 |
| 1370 | 4{107,676,10} | OCCOC1=CN2C(C=C1)=NC(=C2NC1CCOC1<br>)C1=CC=CC2=NON=C12<br> c:8,10,12,24,t:4,22,26,29         | Z8837933182 | 1{107} | Nc1ccc(OC<br>CO)cn1              | 2{676} | O=Cc1cccc2<br>nonc12                           | 3{10} | [C-]<br>]#[N+]C1CC<br>OC1       | 51.7 | 50 |
| 1371 | 4{103,677,5}  | COCCCN1=C(N=C2C=NC=C(CO)N12)C1=<br>NN(C=C1)C1CN(C1)C(=O)OC(C)(C)C<br> c:10,22,t:6,8,12,19    | Z8873685498 | 1{103} | Nc1cnc(C<br>O)n1                 | 2{677} | CC(C)(C)OC<br>(=O)N1CC(C<br>1)n2ccc(C=O<br>)n2 | 3{5}  | COCCC[N+]<br>#[C-]              | 62.1 | 50 |
| 1372 | 4{431,603,10} | COC(=O)C1=CC(=NS1)C1=C(NC2CCOC2)N<br>2C=C(F)C=CC2=N1  c:6,10,23,26,t:4,20                    | Z8873685422 | 1{431} | Nc1ccc(F)c<br>n1                 | 2{603} | COC(=O)c1c<br>c(C=O)ns1                        | 3{10} | [C-]<br>]#[N+]C1CC<br>OC1       | 49.1 | 50 |
| 1373 | 4{448,645,31} | CSCCN1=C(N=C2C=C(F)C(C=C)=CN12)C1<br>=CNN=N1  c:14,22,t:5,7,9,19                             | Z8878918630 | 1{448} | Nc1cc(F)c(<br>C=C)cn1            | 2{645} | O=Cc1c[nH]<br>nn1                              | 3{31} | CSCC[N+]#[<br>C-]               | 43.2 | 50 |
| 1374 | 4{154,160,47} | CC(C)NC1=C(N=C2C=C(C=CN12)[N+])([O-]<br>)=O)C1=CC(=NN1C)C1CC1<br> c:8,10,20,t:4,6,18         | Z8873684929 | 1{154} | Nc1cc(cen1<br>)N+](=O)[<br>O-]   | 2{160} | Cn1nc(cc1C<br>=O)C2CC2                         | 3{47} | CC(C)[N+]#[<br>C-]              | 46.1 | 50 |

|      |               |                                                                                             |             |        |                          |        |                       |       |                             |      |    |
|------|---------------|---------------------------------------------------------------------------------------------|-------------|--------|--------------------------|--------|-----------------------|-------|-----------------------------|------|----|
| 1375 | 4{83,393,18}  | CC(C)(C)NC1=C(N=C2C=CC(=CN12)P(C)(C)=O)C1=CC(Br)=C(F)C=C1<br> c:9,11,26,t:5,7,20,23         | Z8878918877 | 1{83}  | CP(=O)(C)c1ccc(N)nc1     | 2{393} | Fc1ccc(C=O)cc1Br      | 3{18} | CC(C)(C)[N+][C-]            | 59.3 | 50 |
| 1376 | 4{153,318,53} | CC(C)(O)C1=CC=CC2=NC(C3CC3CC3(F)F)=C(NCCOCC3=CC=CC=C3)N12<br> c:6,28,30,t:4,8,19,26         | Z8873685482 | 1{153} | CC(C)(O)c1cccc(N)n1      | 2{318} | FC1(F)CC21CC2C=O      | 3{53} | [C-][N+]CCOCc1ccccc1        | 57.8 | 50 |
| 1377 | 4{38,15,9}    | CNC1=C(N=C2C=C(C=CN12)C#N)C1=CC=C(OC)C=C1  c:6,8,21,t:2,4,15,17                             | Z8873684862 | 1{38}  | Nc1cc(C#N)ccn1           | 2{15}  | COc1ccc(C=O)cc1       | 3{9}  | C[N+][C-]                   | 37.6 | 50 |
| 1378 | 4{366,164,12} | COC1=CC=CN2C(NCC3CCOC3)=C(N=C12)C1=NN(C)C2=C1COCC2  c:4,15,25,t:2,17,21                     | Z8873684843 | 1{366} | COc1ccccc1N              | 2{164} | Cn1nc(C=O)c2COCCc21   | 3{12} | [C-][N+]CC1CCOC1            | 51.8 | 50 |
| 1379 | 4{428,678,10} | COC1=CC(OC)=C(C1)C=C1C1=C(NC2CCOC2)N2C=C(Br)N=CC2=N1<br> c:9,12,25,28,t:2,6,22              | Z8873685486 | 1{428} | Nc1cnc(Br)cn1            | 2{678} | COc1cc(OC)c(C=O)cc1Cl | 3{10} | [C-][N+]C1CCOC1             | 61.3 | 50 |
| 1380 | 4{349,312,23} | COC(=O)CCC(NC1=C(N=C2C=CC(Br)=C(C)N12)C1CCOC1(C)C(=O)OC  c:12,t:8,10,15                     | Z8878918386 | 1{349} | Cc1nc(N)ccc1Br           | 2{312} | CC1(C)OCC1C=O         | 3{23} | COC(=O)CC(C[N+][C-])C(=O)OC | 65.1 | 50 |
| 1381 | 4{32,679,7}   | CP(C)(=O)C1=CC2=NC(=C(NC3CCOCC3)N2C=C1)C1=CC(=CC=C1)C1CCC1<br> c:20,25,27,t:4,6,8,23        | Z8846492376 | 1{32}  | CP(=O)(C)c1ccnc(N)c1     | 2{679} | O=Cc1cccc(c1)C2CCC2   | 3{7}  | [C-][N+]C1CCOCC1            | 57.0 | 50 |
| 1382 | 4{69,33,46}   | CNC(=O)C1=CC2=NC(C3CCCN(C3)C(C)=O)=C(NCC(C)=C)N2C=C1  c:27,t:4,6,18                         | Z8873684791 | 1{69}  | CNC(=O)c1ccnc(N)c1       | 2{33}  | CC(=O)N1C(CCC(C1)C=O) | 3{46} | CC(=C)C[N+][C-]             | 49.7 | 50 |
| 1383 | 4{81,17,13}   | CCOC1=CN=C(N=C1)C1=C(NCC2=CC=C(OC)C=C2)N2C=CN=CC2=N1<br> c:5,7,10,20,24,26,29,t:3,14,16     | Z8873684723 | 1{81}  | Nc1cncn1                 | 2{17}  | CCOc1cnc(C=O)nc1      | 3{13} | COc1ccc(C[N+][C-])cc1       | 50.6 | 50 |
| 1384 | 4{175,33,46}  | CC(=C)CNC1=C(N=C2N1C=CC=C2OCCF)C1CCCN(C1)C(C)=O  c:7,11,13,t:5                              | Z8878918376 | 1{175} | Nc1ncccc1OCCF            | 2{33}  | CC(=O)N1C(CCC(C1)C=O) | 3{46} | CC(=C)C[N+][C-]             | 50.4 | 50 |
| 1385 | 4{103,668,59} | CC1(C)CCCC(CC2=C(NCCC3=CC(F)=CC=C3)N3C(C=NC=C3CO)=N2)O1<br> c:8,16,18,23,25,29,t:13         | Z8873685368 | 1{103} | Nc1cnc(C)cn1             | 2{668} | CC1(C)CCC(C(CC=O)O1)  | 3{59} | Fc1cccc(CC[N+][C-])c1       | 55.5 | 50 |
| 1386 | 4{49,284,20}  | COC1=CC(C)=C(NC2=C(N=C3C=CC=C(CO)N23)C2=C(C)N=CC=N2)C=C1<br> c:12,21,24,26,29,t:2,5,8,10,14 | Z8873684918 | 1{49}  | Nc1cccc(C)cn1            | 2{284} | Cc1cncnc1C=O          | 3{20} | COc1ccc([N+][C-])c(C)c1     | 50.5 | 50 |
| 1387 | 4{109,680,34} | CC(C)(C)C1=NC(=CC=C1)C1=C(NCC2CCC(O2)N2C(C=CC=C2S(N)(=O)=O)=N1<br> c:6,8,11,23,25,31,t:4    | Z8873684828 | 1{109} | Cl.Nc1cccc(n1)S(=O)(=O)N | 2{680} | CC(C)(C)c1cccc(C=O)n1 | 3{34} | [C-][N+]CC1CCO1             | 57.7 | 50 |

|      |               |                                                                                                         |             |        |                                    |        |                              |       |                                     |      |    |
|------|---------------|---------------------------------------------------------------------------------------------------------|-------------|--------|------------------------------------|--------|------------------------------|-------|-------------------------------------|------|----|
| 1388 | 4{91,681,7}   | NC(=O)C1=CN2C(C=C1)=NC(=C2NC1CCOC<br>C1)C1=C(Br)C=CC(Cl)=N1<br> c:7,9,11,22,25,28,t:3                   | Z8855739117 | 1{91}  | NC(=O)c1c<br>cc(N)nc1              | 2{681} | Clc1ccc(Br)c<br>(C=O)n1      | 3{7}  | [C-<br>]#[N+]C1CC<br>OCC1           | 60.6 | 50 |
| 1389 | 4{360,320,66} | COC(=O)C1=CC2=NC(=C(NC(C)C3=CC=CC<br>=C3)N2C=C1Br)C1=NN(C)C=N1<br> c:15,17,22,30,t:4,6,8,13,26          | Z8873684804 | 1{360} | COC(=O)c1<br>cc(N)nc1Br            | 2{320} | Cn1cnc(C=O<br>n1             | 3{66} | CC([N+]#[C-<br>)c1ccccc1            | 61.2 | 50 |
| 1390 | 4{330,653,29} | CCOC(=O)CCNC1=C(N=C2C=CC(=CN12)S(<br>=O)(=O)N(C)C)C1C2CCC(F)(F)C12<br> c:12,14,t:8,10                   | Z8878918876 | 1{330} | CN(C)S(=O<br>) (=O)c1ccc(<br>N)nc1 | 2{653} | FC1(F)CCC2<br>C(C=O)C21      | 3{29} | CCOC(=O)C<br>C[N+]#[C-]             | 61.3 | 50 |
| 1391 | 4{142,608,24} | COC1=CC(CNC2=C(CC3(CCC3)C#N)N=C3N<br>2C=CC=C3OCCS(C)(=O)=O)=CC=C1<br> c:7,17,21,23,32,34,t:2            | Z8846491945 | 1{142} | CS(=O)(=O<br>)CCOc1ccc<br>nc1N     | 2{608} | O=CCC1(CC<br>C1)C#N          | 3{24} | COc1cccc(C[<br>N+]#[C-])c1          | 62.9 | 50 |
| 1392 | 4{292,634,31} | CCOC1=CN=CC2=NC(C(C)C3CCOCC3)=C(<br>NCCSC)N12  c:5,t:3,7,18                                             | Z8878918654 | 1{292} | CCOc1cnc<br>(N)n1                  | 2{634} | CC(C=O)C1<br>CCOCC1          | 3{31} | CSCC[N+]#[<br>C-]                   | 48.9 | 50 |
| 1393 | 4{357,283,49} | OCC1CCN(CC1)C1=CN2C(C=C1)=NC(=C2N<br>C1CC(F)(F)C1)C1=C2N=CC=CC2=CC=C1<br> c:13,15,17,28,30,32,35,37,t:9 | Z8878918884 | 1{357} | Nc1ccc(en1<br>)N2CCC(C<br>O)CC2    | 2{283} | O=Cc1cccc2<br>ccnc12         | 3{49} | FC1(F)CC(C<br>1)[N+]#[C-]           | 62.1 | 50 |
| 1394 | 4{128,229,29} | CCOC(=O)CCNC1=C(N=C2C=CC(=CN12)N(<br>C)CCOC)C1=CN=C(OCCO)C=C1<br> c:12,14,33,t:8,10,25,27               | Z8873684803 | 1{128} | COCCN(C)<br>c1ccc(N)nc<br>1        | 2{229} | OCCOc1ccc(<br>C=O)cn1        | 3{29} | CCOC(=O)C<br>C[N+]#[C-]             | 61.2 | 50 |
| 1395 | 4{32,338,18}  | CC1=C(OC=C1)C1=C(NC(C)(C)C)N2C=CC(=<br>CC2=N1)P(C)(C)=O  c:4,7,15,17,20,t:1                             | Z8878918367 | 1{32}  | CP(=O)(C)c<br>1cnc(N)c1            | 2{338} | Cc1ccoc1C=<br>O              | 3{18} | CC(C)(C)[N<br>+]#[C-]               | 46.2 | 50 |
| 1396 | 4{414,326,21} | CN1N=CC=C1C1=C(NCC2CC2)N2C=C(Cl)N<br>=CC2=N1  c:2,4,7,19,22,t:16                                        | Z8873684909 | 1{414} | Nc1cnc(Cl)<br>cn1                  | 2{326} | Cn1ncclC=<br>O               | 3{21} | [C-<br>]#[N+]CC1C<br>C1             | 40.5 | 50 |
| 1397 | 4{412,682,10} | OCC1=CC2=NC(=C(NC3CCOC3)N2C=C1Br)<br>C1=C(Cl)C(F)=NC=C1  c:17,21,25,27,t:2,4,6                          | Z8878918351 | 1{412} | Nc1cc(CO)c<br>(Br)cn1              | 2{682} | Fc1nccl(C=<br>O)c1Cl         | 3{10} | [C-<br>]#[N+]C1CC<br>OC1            | 59.1 | 50 |
| 1398 | 4{435,312,23} | COC(=O)CCC(NC1=C(N=C2N1C=C(Br)C=C<br>2C)C1CCOC1(C)C)C(=O)OC  c:10,17,t:8,14                             | Z8878918352 | 1{435} | Cc1cc(Br)c<br>nc1N                 | 2{312} | CC1(C)OCC<br>C1C=O           | 3{23} | COC(=O)CC<br>C([N+]#[C-<br>)C(=O)OC | 64.3 | 49 |
| 1399 | 4{50,297,26}  | CCN1N=C(C)C(=N1)C1=C(NCC2=CC=C(F)C<br>=C2)N2C(C=CC=C2P(C)(C)=O)=N1<br> c:6,9,18,23,25,31,t:3,13,15      | Z8849597820 | 1{50}  | CP(=O)(C)c<br>1cccc(N)n1           | 2{297} | CCn1nc(C)c(<br>C=O)n1        | 3{26} | Fc1ccc(C[N+<br>]#[C-])cc1           | 56.8 | 49 |
| 1400 | 4{40,545,22}  | COCCN1N=C(C)C(=C1C)C1=C(NC2COC2)N<br>2C(C=C(C=C2)C(F)(F)F)=N1<br> c:8,12,22,24,31,t:5                   | Z8873684600 | 1{40}  | Cc1cc(cc(N<br>)n1)C(F)(F)<br>F     | 2{545} | COCCn1nc(<br>C)c(C=O)c1<br>C | 3{22} | [C-<br>]#[N+]C1CO<br>C1             | 56.4 | 49 |

|      |               |                                                                                          |             |        |                       |        |                      |       |                                       |      |    |
|------|---------------|------------------------------------------------------------------------------------------|-------------|--------|-----------------------|--------|----------------------|-------|---------------------------------------|------|----|
| 1401 | 4{449,683,14} | COCCNC1=C(N=C2N1C=CC=C2)C1=C(C)N(C)N=C1Br  c:7,11,13,17,22,t:5                           | Z8873684661 | 1{449} | Nc1ncccc1I            | 2{683} | Cc1c(C=O)c(Br)nn1C   | 3{14} | COCC[N+][#C-]                         | 65.2 | 49 |
| 1402 | 4{450,33,21}  | CCC1=CC(Br)=CN2C(NCC3CC3)=C(N=C12)C1CCCN(C1)C(C)=O  c:5,14,t:2,16                        | Z8878918411 | 1{450} | CCc1cc(Br)nc1N        | 2{33}  | CC(=O)N1C CCC(C1)C=O | 3{21} | [C-][#N+]CC1C C1                      | 55.8 | 49 |
| 1403 | 4{32,684,18}  | CC(C)(C)NC1=C(N=C2C=C(C=CN12)P(C)(C)=O)C1=CN(N=N1)C1CCCC1  c:9,11,23,t:5,7,20            | Z8873685458 | 1{32}  | CP(=O)(C)c1ccnc(N)c1  | 2{684} | O=Cc1cn(nn1)C2CCCC2  | 3{18} | CC(C)(C)[N+][#C-]                     | 55.1 | 49 |
| 1404 | 4{49,494,13}  | COC1=CC=C(CNC2=C(N=C3C=CC=C(CO)N23)C2=C(Cl)N=CS2)C=C1  c:12,21,24,28,t:2,4,8,10,14       | Z8878918773 | 1{49}  | Nc1cccc(C)O)n1        | 2{494} | Clc1ncsc1C=O         | 3{13} | COc1ccc(C[N+][#C-])cc1                | 53.3 | 49 |
| 1405 | 4{142,531,21} | CC1=NC=C(C=N1)C1=C(NCC2CC2)N2C=CC=C(OCCS(C)(=O)=O)C2=N1  c:3,5,8,17,29,t:1,19            | Z8835022872 | 1{142} | CS(=O)(=O)CCOc1ccnc1N | 2{531} | Cc1ncc(C=O)cn1       | 3{21} | [C-][#N+]CC1C C1                      | 53.3 | 49 |
| 1406 | 4{389,584,23} | COC(=O)CCC(NC1=C(N=C2N1C=C(C)C=C2)C)C1=C(OC)C=C(C)N=C1)C(=O)OC  c:10,17,21,28,t:8,14,25  | Z8878918437 | 1{389} | Cc1cnc(N)c(C)c1       | 2{584} | COc1cc(C)nc1C=O      | 3{23} | COC(=O)CC C([N+][#C-])C(=O)OC         | 58.5 | 49 |
| 1407 | 4{451,352,62} | COCCCC1=C(NC2(CCCC2)C(=O)OC)N2C(C=CC3=C2C=CC=N3)=N1  c:5,20,22,25,27,29                  | Z8835022895 | 1{451} | Nc1ccc2nccc2n1        | 2{352} | COCCCC=O             | 3{62} | COC(=O)C1(CCCC1)[N+][#C-]             | 50.6 | 49 |
| 1408 | 4{119,304,46} | CC(=C)CNC1=C(N=C2C=CC(=CN12)C#N)C1=C(C)N(CC(F)F)N=C1  c:9,11,18,26,t:5,7                 | Z8829498647 | 1{119} | Nc1ccc(C#N)cn1        | 2{304} | Cc1c(C=O)cnn1CC(F)F  | 3{46} | CC(=C)C[N+][#C-]                      | 47.1 | 49 |
| 1409 | 4{36,420,9}   | CNC1=C(CC(C)(C)C#N)N=C2C=CC(Br)=CN12  c:2,12,15,t:10                                     | Z8873684797 | 1{36}  | Nc1ccc(Br)cn1         | 2{420} | CC(C)(CC=O)C#N       | 3{9}  | C[N+][#C-]                            | 40.6 | 49 |
| 1410 | 4{136,78,14}  | COCCNC1=C(N=C2N1C=C(C)C=C2Br)C1CO C(C)C1  c:7,14,t:5,11                                  | Z8878918455 | 1{136} | Cc1cnc(N)c(Br)c1      | 2{78}  | CC1CC(CO1)C=O        | 3{14} | COCC[N+][#C-]                         | 48.6 | 49 |
| 1411 | 4{161,31,20}  | COC1=CC(C)=C(NC2=C(N=C3C=CC=NN23)C2=CN=CN2)C=C1  c:12,14,21,25,t:2,5,8,10,19             | Z8878918346 | 1{161} | Nc1cccenn1            | 2{31}  | O=Cc1cnc[nH]1        | 3{20} | COc1ccc([N+][#C-])c(C)c1              | 42.2 | 49 |
| 1412 | 4{452,350,74} | CC(C)(C)OC(=O)N1CCCC(C1)NC1=C(N=C2C=CC3=C(C=NC=C3)N12)C1C2CCOCC12  c:19,23,25,t:15,17,21 | Z8878918350 | 1{452} | Nc1ccc2ccncc2n1       | 2{350} | O=CC1C2C COCC12      | 3{74} | CC(C)(C)OC(=O)N1CCC[C@H](C1)[N+][#C-] | 61.0 | 49 |
| 1413 | 4{83,417,31}  | CSCCNC1=C(N=C2C=CC(=CN12)P(C)(C)=O)C1=C2N=NN(C)C2=CC=C1  c:9,11,20,22,27,29,t:5,7        | Z8873685242 | 1{83}  | CP(=O)(C)c1ccc(N)nc1  | 2{417} | Cn1nnc2c(C=O)cccc12  | 3{31} | CSCC[N+][#C-]                         | 54.5 | 49 |

|      |               |                                                                                                          |             |        |                                     |        |                                 |       |                                               |      |    |
|------|---------------|----------------------------------------------------------------------------------------------------------|-------------|--------|-------------------------------------|--------|---------------------------------|-------|-----------------------------------------------|------|----|
| 1414 | 4{209,62,14}  | COCCNC1=C(N=C2N1C=CC=C2N1CCCC1)C1CC11CCOCC1  c:7,11,13,t:5                                               | Z8878918420 | 1{209} | Ne1ncccc1<br>N2CCCCC2               | 2{62}  | O=CC1CC21<br>CCOCC2             | 3{14} | COCC[N+]#[<br>C-]                             | 50.6 | 49 |
| 1415 | 4{91,639,18}  | CC1=NN=C(O1)C1=CC(=CC=C1)C1=C(NC(C)(C)C)N2C=C(C=CC2=N1)C(N)=O  c:3,9,11,14,22,24,27,t:1,7                | Z8873685279 | 1{91}  | NC(=O)c1c<br>cc(N)nc1               | 2{639} | Cc1nnc(o1)c<br>2cccc(C=O)c<br>2 | 3{18} | CC(C)(C)[N<br>+]#[C-]                         | 51.1 | 49 |
| 1416 | 4{155,685,7}  | ClC1=CC=CN2C(NC3CCOCC3)=C(N=C12)C1=CN(CC2CCOC2)N=N1  c:3,14,30,t:1,16,20                                 | Z8849597800 | 1{155} | Ne1ncccc1<br>Cl                     | 2{685} | O=Cc1cn(CC<br>2CCOC2)nn1        | 3{7}  | [C-<br>]#[N+]C1CC<br>OCC1                     | 52.6 | 48 |
| 1417 | 4{93,171,43}  | COC1CC(C(OC)O1)C1=C(NC2CCN(CC2)C(=O)OC(C)(C)C)N2C=C(OC)N=CC2=N1  c:10,32,35,t:28                         | Z8854581175 | 1{93}  | COc1cnc(N<br>)cn1                   | 2{171} | COC1CC(C=<br>O)C(OC)O1          | 3{43} | CC(C)(C)OC<br>(=O)N1CCC(<br>CC1)[N+]#[<br>C-] | 62.4 | 48 |
| 1418 | 4{36,274,13}  | COC1=CC=C(CNC2=C(CC3(CCOCC3)C#N)N=C3C=CC(Br)=CN23)C=C1  c:8,22,25,30,t:2,4,20                            | Z8873684625 | 1{36}  | Ne1ccc(Br)<br>cn1                   | 2{274} | O=CCC1(CC<br>OCC1)C#N           | 3{13} | COc1ccc(C[<br>N+]#[C-])cc1                    | 59.4 | 48 |
| 1419 | 4{193,325,24} | CNC(=O)C1=CN2C(C=C1)=NC(CCN1C(=O)C3=C(C=CC=C3)C1=O)=C2NCC1=CC(OC)=CC=C1  c:8,10,20,22,27,36,38,t:4,18,32 | Z8878918431 | 1{193} | CNC(=O)c1<br>ccc(N)nc1              | 2{325} | O=CCCN1C(<br>=O)c2cccc2<br>C1=O | 3{24} | COc1cccc(C[<br>N+]#[C-])c1                    | 63.0 | 48 |
| 1420 | 4{93,425,60}  | COC(=O)C1=CC(NC2=C(N=C3C=NC(OC)=CN23)C2CCCN(C2)S(C)(=O)=O)=CC=C1  c:12,16,31,33,t:4,8,10                 | Z8873684614 | 1{93}  | COc1cnc(N<br>)cn1                   | 2{425} | CS(=O)(=O)<br>N1CCCC(C1<br>)C=O | 3{60} | COC(=O)c1c<br>ccc([N+]#[C-<br>)c1             | 59.8 | 48 |
| 1421 | 4{373,83,39}  | CCOCCNC1=C(N=C2C=CC(CNC(=O)OC(C)(C)C)=CN12)C1=CC(=CC=C1)S(N)(=O)=O  c:10,21,28,30,t:6,8,26               | Z8878918606 | 1{373} | CC(C)(C)O<br>C(=O)NCc1<br>ccc(N)nc1 | 2{83}  | NS(=O)(=O)<br>c1cccc(C=O)<br>c1 | 3{39} | CCOCC[N+]#<br>#[C-]                           | 69.0 | 48 |
| 1422 | 4{99,686,34}  | CCNC(=O)C1=CC=C(C=C1)C1=C(NCC2CCC(O2)N2C=C(C=CC2=N1)S(N)(=O)=O  c:7,9,12,23,25,28,t:5                    | Z8878918473 | 1{99}  | Ne1ccc(en1<br>)S(=O)(=O)<br>N       | 2{686} | CCNC(=O)c<br>1ccc(C=O)cc<br>1   | 3{34} | [C-<br>]#[N+]CC1C<br>CCO1                     | 57.7 | 48 |
| 1423 | 4{363,687,62} | COC(=O)C1=CC2=NC(=C(NC3(CCCC3)C(=O)OC)N2C=C1)C1=C2CSCCC2=NN1C  c:23,26,33,t:4,6,8                        | Z8873684689 | 1{363} | COC(=O)c1<br>ccnc(N)c1              | 2{687} | Cn1nc2CCS<br>Cc2c1C=O           | 3{62} | COC(=O)C1(<br>CCCC1)[N+]#<br>#[C-]            | 61.1 | 48 |
| 1424 | 4{107,688,10} | COC1=C(C2=C(NC3CCOC3)N3C=C(OCCO)C=CC3=N2)C(C)=C(Br)C=N1  c:2,4,20,23,30,t:14,27                          | Z8873685266 | 1{107} | Ne1ccc(OC<br>CO)cn1                 | 2{688} | COc1ncc(Br)<br>c(C)c1C=O        | 3{10} | [C-<br>]#[N+]C1CC<br>OC1                      | 60.3 | 48 |

|      |               |                                                                                                       |             |        |                           |        |                                    |       |                              |      |    |
|------|---------------|-------------------------------------------------------------------------------------------------------|-------------|--------|---------------------------|--------|------------------------------------|-------|------------------------------|------|----|
| 1425 | 4{153,689,22} | CC(=O)OCCN1C=C(C=N1)C1=C(NC2COC2)N2C(C=CC=C2C(C)O)=N1<br> c:7,9,12,22,24,30                           | Z8873684893 | 1{153} | CC(C)(O)c1cccc(N)n1       | 2{689} | CC(=O)OCCn1cc(C=O)cn1              | 3{22} | [C-]<br>#[N+]C1CO<br>C1      | 52.0 | 48 |
| 1426 | 4{366,296,39} | CCOCCNC1=C(N=C2N1C=CC=C2OC)C1=C(N(CCF)N=C1  c:8,12,14,25,t:6,19                                       | Z8849597807 | 1{366} | COc1ccnc1N                | 2{296} | FCCn1cc(C=O)cn1                    | 3{39} | CCOCC[N+]#[C-]               | 45.2 | 48 |
| 1427 | 4{174,588,61} | CN1C=C(C(C)=N1)C1=C(NCCCNC(=O)OC(C)(C)C)N2C(C=CC=C2C#N)=N1<br> c:2,5,8,24,26,30                       | Z8878918523 | 1{174} | Nc1cccc(C#N)n1            | 2{588} | Cc1nn(C)cc1C=O                     | 3{61} | CC(C)(C)OC(=O)NCCC[N+]#[C-]  | 53.3 | 48 |
| 1428 | 4{193,690,10} | CNC(=O)C1=CN2C(C=C1)=NC(CCC1(CCN(C1)C(=O)OC(C)(C)C)C#N)=C2NC1CCOC1<br> c:8,10,30,t:4                  | Z8873684584 | 1{193} | CNC(=O)c1ccc(N)nc1        | 2{690} | CC(C)(C)OC(=O)N1CCC(CCC=O)(CC1)C#N | 3{10} | [C-]<br>#[N+]C1CCOC1         | 64.6 | 48 |
| 1429 | 4{41,25,13}   | COC1=CC=C(CNC2=C(N=C3C=NC(C)=CN23)C2=CN=C(N=C2)C2CCOCC2)C=C1<br> c:12,15,22,24,34,t:2,4,8,10,20       | Z8878918532 | 1{41}  | Cc1cnc(N)cn1              | 2{25}  | O=Cc1cnc(nc1)C2CCOCC2              | 3{13} | COc1ccc(C[N+]#[C-])cc1       | 56.0 | 48 |
| 1430 | 4{167,386,23} | COC(=O)CCC(NC1=C(N=C2N1C(C)=CN=C2C)[C@H]1CC1(C)C)C(=O)OC  c:10,15,17,t:8                              | Z8878918593 | 1{167} | Cc1cnc(C)c(N)n1           | 2{386} | CC1(C)C[C@@H]1C=O                  | 3{23} | COC(=O)CC(C[N+]#[C-])C(=O)OC | 50.3 | 48 |
| 1431 | 4{70,60,31}   | CSCCNC1=C(N=C2N1C=CN=C2C1CC1)C(C)C1CCOC1  c:7,11,13,t:5                                               | Z8873685406 | 1{70}  | Nc1cncnc1C2CC2            | 2{60}  | CC(C=O)C1CCOC1                     | 3{31} | CSCC[N+]#[C-]                | 44.8 | 48 |
| 1432 | 4{139,369,46} | CC(=C)CNC1=C(N=C2C=C(C=CN12)C(F)F)C1=CON=C1C  c:9,11,22,t:5,7,19                                      | Z8873684771 | 1{139} | Nc1cc(cen1)C(F)F          | 2{369} | Cc1noc1C=O                         | 3{46} | CC(=C)C[N+]#[C-]             | 41.2 | 48 |
| 1433 | 4{453,312,23} | CCC1=CN2C(C=C1)=NC(C1CCOC1(C)C)=C2NC(CCC(=O)OC)C(=O)OC  c:6,8,18,t:2                                  | Z8878918617 | 1{453} | CCc1ccc(N)nc1             | 2{312} | CC1(C)OCC1C=O                      | 3{23} | COC(=O)CC(C[N+]#[C-])C(=O)OC | 53.8 | 48 |
| 1434 | 4{330,674,29} | CCOC(=O)CCNC1=C(N=C2C=CC(=CN12)S(=O)(=O)N(C)C)C1=C(C)NN=C1C1<br> c:12,14,25,29,t:8,10                 | Z8878918825 | 1{330} | CN(C)S(=O)(=O)c1ccc(N)nc1 | 2{674} | Cc1[nH]nc(C1)c1C=O                 | 3{29} | CCOC(=O)C(C[N+]#[C-])        | 58.6 | 48 |
| 1435 | 4{454,103,37} | COC(=O)C1CC(C1)NC1=C(N=C2C=C(OC(C)C(F)(F)F)C=CN12)C1CCC2(COC2)OC1<br> c:23,t:10,12,14                 | Z8873685311 | 1{454} | CC(Oc1ccnc(N)c1)C(F)(F)F  | 2{103} | O=CC1CCC2(COC2)OC1                 | 3{37} | COC(=O)C1CC(C1)[N+]#[C-]     | 62.3 | 48 |
| 1436 | 4{53,691,60}  | COC(=O)C1=CC(NC2=C(N=C3C=CC(CO)=CN23)C2=CC(=C(C)O2)S(C)(=O)=O)=CC=C1<br> c:12,16,31,33,t:4,8,10,21,23 | Z8873684605 | 1{53}  | Nc1ccc(CO)cn1             | 2{691} | Cc1oc(C=O)cc1S(=O)(=O)C            | 3{60} | COC(=O)c1ccc([N+]#[C-])c1    | 58.6 | 48 |
| 1437 | 4{91,439,7}   | COC1=C(C=CC(=C1)C1=C(NC2CCOCC2)N2C=C(C=CC2=N1)C(N)=O)S(C)(=O)=O<br> c:4,6,9,20,22,25,t:2              | Z8878918831 | 1{91}  | NC(=O)c1ccc(N)nc1         | 2{439} | COc1cc(C=O)ccc1S(=O)(=O)C          | 3{7}  | [C-]<br>#[N+]C1CCOCC1        | 57.1 | 48 |

|      |               |                                                                                                   |             |        |                            |        |                                     |       |                                                 |      |    |
|------|---------------|---------------------------------------------------------------------------------------------------|-------------|--------|----------------------------|--------|-------------------------------------|-------|-------------------------------------------------|------|----|
| 1438 | 4{47,158,26}  | NS(=O)(=O)C1=CC2=NC(C3=CN(C=C)N=C3)=C(NCC3=CC=C(F)C=C3)N2C=C1<br> c:14,25,30,t:4,6,9,16,20,22     | Z8849597833 | 1{47}  | Cl.Nc1cc(ccn1)S(=O)(=O)N   | 2{158} | C=Cn1cc(C=O)en1                     | 3{26} | Fc1ccc(C[N+][C-])cc1                            | 53.0 | 48 |
| 1439 | 4{327,47,41}  | COC(=O)C1=C(F)C2=NC(CCOCC=C)=C(NC3=CC=C(OC)C=C3)N2C=C1<br> c:4,24,29,t:7,15,18,20                 | Z8849597797 | 1{327} | COC(=O)c1ccnc(N)c1F        | 2{47}  | C=CCOCCC=O                          | 3{41} | COc1ccc([N+][C-])cc1                            | 51.2 | 47 |
| 1440 | 4{173,147,64} | COCCCCC1=C(N[C@@H]2CC[C@@H](C2)C(=O)OC)N2C=C(C=C(Br)C2=N1)C(=O)N(C)C<br> &1:9,12,r,c:6,20,26,t:22 | Z8873684645 | 1{173} | CN(C)C(=O)c1cnc(N)c(Br)c1  | 2{147} | COCCCCC=O                           | 3{64} | COC(=O)[C@@H]1CC[C@@H](C1)[N+][C-]<br> &1:4,7,r | 63.5 | 47 |
| 1441 | 4{139,692,10} | CN1N=C(C2=C1CCN(C2)C(=O)OC(C)(C)C)C1=C(NC2CCOC2)N2C=CC(=CC2=N1)C(F)F<br> c:2,4,19,29,31,34        | Z8854581147 | 1{139} | Nc1cc(ccn1)C(F)F           | 2{692} | Cn1nc(C=O)c2CN(CCc21)C(=O)OC(C)(C)C | 3{10} | [C-][N+]C1CCOC1                                 | 62.3 | 47 |
| 1442 | 4{107,139,72} | CC1=NN(CCO)C(C)=C1C1=C(NC2=C(C)C=C(F)C=C2)N2C=C(OCCO)C=CC2=N1<br> c:8,11,14,20,30,33,t:1,17,24    | Z8854581169 | 1{107} | Nc1ccc(OC)COen1            | 2{139} | Cc1m(CCO)c(C)c1C=O                  | 3{72} | Cc1cc(F)ccc1[N+][C-]                            | 55.8 | 47 |
| 1443 | 4{50,693,14}  | CCC1=C(SC=C1)C1=C(NCCOC)N2C(C=CC=C2P(C)(C)=O)=N1<br> c:5,8,17,19,25,t:2                           | Z8855739084 | 1{50}  | CP(=O)(C)c1cccc(N)n1       | 2{693} | CCc1ccsc1C=O                        | 3{14} | COCC[N+][C-]                                    | 47.9 | 47 |
| 1444 | 4{455,403,23} | COC(=O)CCC(NC1=C(N=C2C=C(Cl)C=C(Cl)N12)C1=CN=C(Cl)N1)C(=O)OC<br> t:8,10,12,15,21,23               | Z8873685301 | 1{455} | Nc1cc(Cl)cc(Cl)n1          | 2{403} | Clc1ncc(C=O)[nH]1                   | 3{23} | COC(=O)CC(C[N+][C-])C(=O)OC                     | 58.5 | 47 |
| 1445 | 4{369,441,7}  | CCC(C)C(OC)C1=C(NC2CCOCC2)N2C=C(C=CC2=N1)C(F)C(F)(F)F<br> c:7,18,20,23                            | Z8873684615 | 1{369} | Cl.Nc1ccc(cn1)C(F)C(F)(F)F | 2{441} | CCC(C)C(OC)C=O                      | 3{7}  | [C-][N+]C1CCOCC1                                | 53.0 | 47 |
| 1446 | 4{66,694,22}  | COCCC1=CC2=NC(C3CCCN(C3)C(=O)OC(C)(C)C)=C(NC3COC3)N2C=C1<br> c:32,t:4,6,22                        | Z8873684777 | 1{66}  | COCCc1ccnc(N)c1            | 2{694} | CC(C)(C)OC(=O)N1CCC(C(C1)C=O        | 3{22} | [C-][N+]C1COC1                                  | 54.7 | 47 |
| 1447 | 4{42,695,7}   | COC(=O)COC1=C(OC)C=CC(=C1)C1=C(NC2CCOCC2)N2C=C(SC)C=CC2=N1<br> c:6,10,12,15,30,33,t:26            | Z8873685254 | 1{42}  | CSc1ccc(N)nc1              | 2{695} | COC(=O)COc1cc(C=O)ccc1OC            | 3{7}  | [C-][N+]C1CCOCC1                                | 58.1 | 47 |
| 1448 | 4{69,111,21}  | CNC(=O)C1=CC2=NC(C3CCCC3)=C(NCC3C3)N2C=C1<br> c:24,t:4,6,14                                       | Z8873684662 | 1{69}  | CNC(=O)c1ccnc(N)c1         | 2{111} | O=CC1CCC1                           | 3{21} | [C-][N+]CC1C1                                   | 39.6 | 47 |

|      |               |                                                                                                           |             |        |                                          |        |                                 |       |                                      |      |    |
|------|---------------|-----------------------------------------------------------------------------------------------------------|-------------|--------|------------------------------------------|--------|---------------------------------|-------|--------------------------------------|------|----|
| 1449 | 4{209,246,14} | COCCNC1=C(N=C2N1C=CC=C2N1CCCC1)C1CC11CCOC1  c:7,11,13,t:5                                                 | Z8873684821 | 1{209} | Ne1ncccc1<br>N2CCCCC2                    | 2{246} | O=CC1CC21<br>CCOC2              | 3{14} | COCC[N+]#[C-]                        | 48.8 | 47 |
| 1450 | 4{456,597,7}  | CC1=C(C)N=C(O1)C1=C(NC2CCOCC2)N2C=CC(OCCNC(=O)OC(C)(C)C)=CC2=N1  c:1,4,8,19,32,35                         | Z8878918453 | 1{456} | CC(C)(C)O<br>C(=O)NCC<br>Oc1cnc(N)<br>c1 | 2{597} | Cc1nc(C=O)<br>oc1C              | 3{7}  | [C-]<br>#[N+]C1CC<br>OCC1            | 59.7 | 47 |
| 1451 | 4{351,156,44} | CN1C=NC(Cl)=C1C1=C(NCCCCNC(=O)OC(C)(C)C)N2C(C=CC3=C2C(O)CC3)=N1  c:2,5,8,25,27,34                         | Z8878918530 | 1{351} | Ne1ccc2CC<br>C(O)c2n1                    | 2{156} | Cn1cnc(Cl)c<br>1C=O             | 3{44} | CC(C)(C)OC<br>(=O)NCCCC<br>[N+]#[C-] | 60.1 | 47 |
| 1452 | 4{28,639,7}   | CC1=NN=C(O1)C1=CC(=CC=C1)C1=C(NC2CCOCC2)N2C=CC(=CC2=N1)C1=NOC=N1  c:3,9,11,14,25,27,30,36,t:1,7,33        | Z8873684579 | 1{28}  | Cl.Nc1cc(cc<br>n1)c2ncon2                | 2{639} | Cc1nnc(o1)c<br>2cccc(C=O)c<br>2 | 3{7}  | [C-]<br>#[N+]C1CC<br>OCC1            | 56.0 | 47 |
| 1453 | 4{28,153,18}  | CC(C)(C)NC1=C(N=C2C=C(C=CN12)C1=NO<br>C=N1)C1=CN(CC(F)(F)F)N=N1  c:9,11,19,30,t:5,7,16,22                 | Z8878918566 | 1{28}  | Cl.Nc1cc(cc<br>n1)c2ncon2                | 2{153} | FC(F)(F)Cn1<br>cc(C=O)nn1       | 3{18} | CC(C)(C)[N<br>+]#[C-]                | 51.3 | 47 |
| 1454 | 4{193,392,10} | CNC(=O)C1=CN2C(C=C1)=NC(C1CCOCC1)=C2NC1CCOC1  c:8,10,19,t:4                                               | Z8837933148 | 1{193} | CNC(=O)c1<br>ccc(N)nc1                   | 2{392} | O=CC1CCO<br>CC1                 | 3{10} | [C-]<br>#[N+]C1CC<br>OC1             | 43.5 | 47 |
| 1455 | 4{367,480,34} | CC1=CN2C(NCC3CCCO3)=C(N=C2C(=C1)C<br>#C)C1=CC2=C(CCOC2)N=C1  c:12,14,17,31,t:1,22,24                      | Z8878918521 | 1{367} | Cc1cnc(N)c<br>(C#C)c1                    | 2{480} | O=Cc1cnc2C<br>COCc2c1           | 3{34} | [C-]<br>#[N+]CC1C<br>CCO1            | 49.0 | 47 |
| 1456 | 4{388,509,67} | CCC(C)NC1=C(N=C2C=C3CCCO3=CN12)<br>C1=NN=CN1C  c:16,23,t:5,7,9,21                                         | Z8878918886 | 1{388} | Cl.Nc1cc2C<br>CCOc2cn1                   | 2{509} | Cn1cnc1C=<br>O                  | 3{67} | CCC(C)[N+]<br>#[C-]                  | 41.1 | 47 |
| 1457 | 4{78,629,75}  | CC1=CN2N3C(C=C(C)C2=N1)=NC(=C3NCC<br>1=C(Br)C=CC=C1)C1=C(C)C=C(C)C=N1  c:10,12,14,19,22,24,27,33,t:1,6,30 | Z8878918790 | 1{78}  | Cc1cn2nc(N)<br>cc(C)c2n1                 | 2{629} | Cc1cnc(C=O)<br>c(C)c1           | 3{75} | Br1ccccc1C<br>[N+]#[C-]              | 59.8 | 47 |
| 1458 | 4{457,99,15}  | CCNC1=C(N=C2C=C(C(F)F)C(Br)=CN12)C1<br>=COC=N1  c:13,21,t:3,5,7,18                                        | Z8878918390 | 1{457} | Ne1cc(C(F)<br>F)c(Br)cn1                 | 2{99}  | O=Cc1cocn1                      | 3{15} | CC[N+]#[C-]                          | 44.8 | 46 |
| 1459 | 4{374,696,62} | COCCC1=NC=C(S1)C1=C(NC2(CCCC2)C(=O)<br>OC)N2C(C=CC=C2C(=O)OC)=N1  c:6,10,25,27,33,t:4                     | Z8878918657 | 1{374} | COC(=O)c1<br>cccc(N)n1                   | 2{696} | COCCc1ncc(<br>C=O)s1            | 3{62} | COC(=O)C1(<br>CCCC1)[N+]<br>#[C-]    | 57.4 | 46 |
| 1460 | 4{81,30,6}    | CCOC(=O)CCNC1=C(N=C2C=NC=CN12)C<br>1CCN(CC1)C(C)=O  c:13,15,t:9,11                                        | Z8846492161 | 1{81}  | Ne1cncn1                                 | 2{30}  | CC(=O)N1C<br>CC(CC1)C=<br>O     | 3{6}  | CCOC(=O)C<br>CC[N+]#[C-]             | 46.4 | 46 |



|      |               |                                                                                                 |             |        |                             |        |                                     |       |                                      |      |    |
|------|---------------|-------------------------------------------------------------------------------------------------|-------------|--------|-----------------------------|--------|-------------------------------------|-------|--------------------------------------|------|----|
| 1461 | 4{155,246,14} | COCCNC1=C(N=C2N1C=CC=C2Cl)C1CC11<br>CCCOC1  c:7,11,13,t:5                                       | Z8878918901 | 1{155} | Ne1ncecc1<br>Cl             | 2{246} | O=CC1CC21<br>CCCOC2                 | 3{14} | COCC[N+][#<br>C-]                    | 41.7 | 46 |
| 1462 | 4{79,697,13}  | CCC1=NC=C(N1)C1=C(NCC2=CC=C(OC)C=C2)<br>N2C(C=NC=C2C)=N1<br> c:4,8,18,23,25,28,t:2,12,14        | Z8873685303 | 1{79}  | Cc1ncce(N)<br>n1            | 2{697} | CCc1nce(C=<br>O)[nH]1               | 3{13} | COc1ccc(C[<br>N+][#C-])cc1           | 44.9 | 46 |
| 1463 | 4{436,294,23} | CCC1=CC2=NC(=C(NC(CCC(=O)OC)C(=O)<br>OC)N2C=C1)C1=C(OC)C(=O)C=CO1<br> c:22,25,31,t:2,4,6        | Z8873684864 | 1{436} | CCc1cenc(<br>N)c1           | 2{294} | COc1c(C=O)<br>occc1=O               | 3{23} | COC(=O)CC<br>C([N+][#C-]<br>)C(=O)OC | 54.6 | 46 |
| 1464 | 4{166,698,22} | CC(C)(C)OC(=O)N1CCC(CC1)C1=C(NC2CO<br>C2)N2C=CC(CSCCO)=CC2=N1<br> c:14,23,30,33                 | Z8878918872 | 1{166} | Ne1cc(CSC<br>CO)ccn1        | 2{698} | CC(C)(C)OC<br>(=O)N1CCC(<br>CC1)C=O | 3{22} | [C-<br>][N+]C1CO<br>C1               | 61.8 | 45 |
| 1465 | 4{348,699,39} | CCOCCNC1=C(N=C2C=NC(F)=CN12)C1=C<br>C=C(C=C1)C1(F)COC1  c:10,13,20,22,t:6,8,18                  | Z8873684846 | 1{348} | Ne1enc(F)c<br>n1            | 2{699} | FC1(COC1)c<br>2ccc(C=O)cc<br>2      | 3{39} | CCOCC[N+]<br>#[C-]                   | 45.9 | 45 |
| 1466 | 4{359,700,22} | CC(C)(C)OC(=O)N1CC(C1)C1=C(NC2COC2)<br>N2C=C(OC(F)F)C=CC2=N1  c:12,27,30,t:21                   | Z8878918370 | 1{359} | Ne1ccc(OC(<br>F)F)cn1       | 2{700} | CC(C)(C)OC<br>(=O)N1CC(C<br>1)C=O   | 3{22} | [C-<br>][N+]C1CO<br>C1               | 48.6 | 45 |
| 1467 | 4{458,662,46} | CC(=C)CNC1=C(N=C2C=CC=C(Br)N12)C1=C<br>CC(=CC=C1)P(C)(C)=O  c:9,19,21,t:5,7,11,17               | Z8849597795 | 1{458} | Ne1cccc(Br)<br>n1           | 2{662} | CP(=O)(C)c1<br>cccc(C=O)c1          | 3{46} | CC(=C)C[N+]<br>#[C-]                 | 51.0 | 45 |
| 1468 | 4{378,701,10} | C(OC1=CC=CN2C(NC3CCOC3)=C(N=C12)C<br>1=CN=CC=C1)C1=CN=CC=C1<br> c:4,14,22,24,29,31,t:2,16,20,27 | Z8873685385 | 1{378} | Ne1ncecc1<br>OCe2ccenc<br>2 | 2{701} | O=Cc1ccenc<br>1                     | 3{10} | [C-<br>][N+]C1CC<br>OC1              | 47.2 | 45 |
| 1469 | 4{66,700,22}  | COCCC1=CC2=NC(C3CN(C3)C(=O)OC(C)(C)<br>C)=C(NC3COC3)N2C=C1  c:30,t:4,6,20                       | Z8878918304 | 1{66}  | COCCc1ccn<br>c(N)c1         | 2{700} | CC(C)(C)OC<br>(=O)N1CC(C<br>1)C=O   | 3{22} | [C-<br>][N+]C1CO<br>C1               | 45.9 | 45 |
| 1470 | 4{50,604,18}  | CCN1N=C(C2=C1C=CC=C2)C1=C(NC(C)(C)<br>C)N2C(C=CC=C2P(C)(C)=O)=N1<br> c:3,5,8,10,13,22,24,30     | Z8873684874 | 1{50}  | CP(=O)(C)c<br>1cccc(N)n1    | 2{604} | CCn1nc(C=O)<br>c2cccc12             | 3{18} | CC(C)(C)[N<br>+][#C-]                | 49.8 | 45 |
| 1471 | 4{445,564,29} | CCOC(=O)CCNC1=C(N=C2C=NC(SC)=CN12)<br>C1=CN=NN1C  c:12,16,23,t:8,10,21                          | Z8873684880 | 1{445} | CSc1enc(N)<br>cn1           | 2{564} | Cn1ncc1C=<br>O                      | 3{29} | CCOC(=O)C<br>C[N+][#C-]              | 43.8 | 45 |
| 1472 | 4{378,702,12} | CC(C)CC1=C(NCC2CCOC2)N2C=CC=C(OC<br>C3=CN=CC=C3)C2=N1<br> c:4,15,23,25,29,t:17,21               | Z8873684951 | 1{378} | Ne1ncecc1<br>OCe2ccenc<br>2 | 2{702} | CC(C)CC=O                           | 3{12} | [C-<br>][N+]CC1C<br>COC1             | 45.9 | 45 |

|      |               |                                                                                                   |             |        |                                |        |                                     |       |                          |      |    |
|------|---------------|---------------------------------------------------------------------------------------------------|-------------|--------|--------------------------------|--------|-------------------------------------|-------|--------------------------|------|----|
| 1473 | 4{425,32,46}  | CC(C)OC1=NC=CN2C(NCC(C)=C)=C(N=C12)[C@@H]1C[C@H]1C1=CC=NN1C  &1:18,20,r,c:6,14,26,t:4,16,24       | Z8878918354 | 1{425} | CC(C)Oe1nccnc1N                | 2{32}  | Cn1nccc1[C@@H]2C[C@H]2C=O  &1:6,8,r | 3{46} | CC(=C)C[N+]#[C-]         | 44.1 | 45 |
| 1474 | 4{141,331,35} | CSCCCNC1=C(N=C2C=C(NC(C)=O)C=CN12)C1=CC2=C(OCCNC2=O)C=C1  c:16,32,t:6,8,10,21,23                  | Z8878918507 | 1{141} | CC(=O)Nc1ccnc(N)c1             | 2{331} | O=Cc1ccc2OCCNC(=O)c2c1              | 3{35} | CSCCC[N+]#[C-]           | 52.9 | 45 |
| 1475 | 4{50,703,35}  | CSCCCNC1=C(N=C2C=CC=C(N12)P(C)(C)=O)C1=NC2=C(C=CC(C1)=C2)C=C1  c:10,12,25,28,31,t:6,8,21,23       | Z8829498499 | 1{50}  | CP(=O)(C)c1cccc(N)n1           | 2{703} | Clc1ccc2ccc(C=O)nc2c1               | 3{35} | CSCCC[N+]#[C-]           | 55.1 | 44 |
| 1476 | 4{348,704,39} | CCOCCNC1=C(N=C2C=NC(F)=CN12)C1=NC(=NN1C)C1CC1  c:10,13,20,t:6,8,18                                | Z8878918625 | 1{348} | Nc1cnc(F)c1n1                  | 2{704} | Cn1nc(nc1C=O)C2CC2                  | 3{39} | CCOCC[N+]#[C-]           | 47.4 | 44 |
| 1477 | 4{88,382,34}  | COC(C)(C)CC1=C(NCC2CCCO2)N2C=CC(Br)=C(F)C2=N1  c:6,17,24,t:20                                     | Z8878918372 | 1{88}  | Nc1nccc(Br)c1F                 | 2{382} | COC(C)(C)C=C=O                      | 3{34} | [C-]#[N+]CC1C=CCO1       | 48.1 | 44 |
| 1478 | 4{104,705,39} | CCOCCNC1=C(CCCCC#C)N=C2C=CC3=C(COCC3)N12  c:6,17,t:15,19                                          | Z8855739223 | 1{104} | Nc1ccc2CCOCc2n1                | 2{705} | O=CCCCC#C                           | 3{39} | CCOCC[N+]#[C-]           | 42.7 | 44 |
| 1479 | 4{371,395,21} | CC(C)(C)OC(=O)N[C@H]1C[C@@H](C1)C1=C(NCC2CC2)N2C=CC=C(OCCCC#N)C2=N1  r,c:13,22,33,t:24            | Z8855619719 | 1{371} | Nc1ncccc1OCCCC#N               | 2{395} | CC(C)(C)OC(=O)N[C@H]1C[C@@H](C1)C=O | 3{21} | [C-]#[N+]CC1C=C1         | 52.7 | 44 |
| 1480 | 4{330,706,29} | CCOC(=O)CCNC1=C(N=C2C=CC(=CN12)S(=O)(=O)N(C)C)C1=CC(=NN1CC)C1CC1  c:12,14,27,t:8,10,25            | Z8878918881 | 1{330} | CN(C)S(=O)(=O)c1ccc(N)nc1      | 2{706} | CCn1nc(cc1C=O)C2CC2                 | 3{29} | CCOC(=O)C[N+]#[C-]       | 56.8 | 44 |
| 1481 | 4{70,61,35}   | CSCCCNC1=C(N=C2N1C=CN=C2C1CC1)C1=CC=C(C=C1)S(C)=O  c:8,12,14,23,25,t:6,21                         | Z8829498725 | 1{70}  | Nc1ncnc1C2CC2                  | 2{61}  | CS(=O)c1ccc(C=O)cc1                 | 3{35} | CSCCC[N+]#[C-]           | 47.9 | 44 |
| 1482 | 4{437,217,67} | CCC(C)NC1=C(N=C2C=CC3=C(NC(=N3)C(F)(F)F)N12)C1=CC(=O)N(C)C=C1  c:9,14,30,t:5,7,11,24              | Z8873684902 | 1{437} | Cl.Nc1ccc2nc([nH]c2n1)C(F)(F)F | 2{217} | Cn1ccc(C=O)cc1=O                    | 3{67} | CCC(C)[N+]#[C-]          | 48.3 | 44 |
| 1483 | 4{113,707,6}  | CCOC(=O)CCNC1=C(N=C2N1C=CC=C2N1CCOCC1)C1=NC(=NC=C1)N(C)C  c:11,15,17,29,31,t:9,27                 | Z8873684707 | 1{113} | Nc1ncccc1N2CCOCC2              | 2{707} | CN(C)c1nccc(C=O)n1                  | 3{6}  | CCOC(=O)C[N+]#[C-]       | 54.2 | 44 |
| 1484 | 4{73,430,20}  | COC1=CC(C)=C(NC2=C(N=C3C=CC4=NC=CN4N23)C2=C(C)N=C(OC)C=C2)C=C1  c:12,16,23,30,33,t:2,5,8,10,14,26 | Z8873684873 | 1{73}  | Nc1ccc2nccn2n1                 | 2{430} | COc1ccc(C=O)c(C)n1                  | 3{20} | COc1ccc([N+]#[C-])c(C)c1 | 49.5 | 44 |

|      |               |                                                                                                           |             |        |                       |        |                                 |       |                                 |      |    |
|------|---------------|-----------------------------------------------------------------------------------------------------------|-------------|--------|-----------------------|--------|---------------------------------|-------|---------------------------------|------|----|
| 1485 | 4{333,535,34} | CC(C)(O)C1=CC(=NO1)C1=C(NCC2CCCO2)N2C(C=CC=C2C2=CC=NC=C2)=N1<br> c:6,10,22,24,29,31,33,t:4,27             | Z8837933154 | 1{333} | Nc1cccc(n1)c2cnc2     | 2{535} | CC(C)(O)c1c(C=O)no1             | 3{34} | [C-]<br>#[N+]CC1C<br>CCO1       | 50.1 | 44 |
| 1486 | 4{99,349,50}  | CC1(C)O[C@@H]2CC(C[C@@H]2O1)C1=C(NC2=CC3=C(OCCO3)C=C2)N2C=C(C=CC2=N1)S(N)(=O)=O  c:12,24,28,30,33,t:15,17 | Z8873684900 | 1{99}  | Nc1ccc(en1)S(=O)(=O)N | 2{349} | CC1(C)O[C@@H]2CC(C[C@@H]2O1)C=O | 3{50} | [C-]<br>#[N+]c1ccc<br>2OCCOc2c1 | 58.0 | 44 |
| 1487 | 4{155,344,14} | COCCNC1=C(N=C2N1C=CC=C2Cl)C1=C(C)C=NN1COC  c:7,11,13,17,20,t:5                                            | Z8854581167 | 1{155} | Nc1ncccc1Cl           | 2{344} | COcN1ccc(C)c1C=O                | 3{14} | COCC[N+]#[C-]                   | 41.5 | 44 |
| 1488 | 4{123,299,22} | COC1=C(OC)C(C2=C(NC3COC3)N3C=CC(O)CCO)=CC3=N2=C(F)C=C1<br> c:2,7,16,22,25,30,t:27                         | Z8878918466 | 1{123} | Cl.Nc1cc(O)CCO)ccn1   | 2{299} | COc1ccc(F)c(C=O)c1OC            | 3{22} | [C-]<br>#[N+]C1CO<br>C1         | 41.2 | 44 |
| 1489 | 4{139,708,12} | CC1=NC(C)=C(C=C1)C1=C(NCC2CCOC2)N2C=CC(=CC2=N1)C(F)F  c:4,6,9,20,22,25,t:1                                | Z8829498785 | 1{139} | Nc1cc(en1)C(F)F       | 2{708} | Cc1ccc(C=O)c(C)n1               | 3{12} | [C-]<br>#[N+]CC1C<br>COC1       | 43.9 | 44 |
| 1490 | 4{433,340,18} | CCN1C=NC(=N1)C1=C(NC(C)(C)C)N2C(C=CC(C#C)=C2C)=N1  c:3,5,8,17,21,24                                       | Z8873684740 | 1{433} | Cc1nc(N)cc1C#C        | 2{340} | CCn1cnc(C=O)n1                  | 3{18} | CC(C)(C)[N+]#[C-]               | 37.8 | 43 |
| 1491 | 4{95,709,31}  | CSCCNC1=C(N=C2C=CC(=CN12)C(F)F)C1=CC=C(OCCO)C=C1  c:9,11,27,t:5,7,19,21                                   | Z8878918594 | 1{95}  | Nc1ccc(en1)C(F)F      | 2{709} | OCCOc1ccc(C=O)cc1               | 3{31} | CSCC[N+]#[C-]                   | 46.0 | 43 |
| 1492 | 4{69,710,46}  | CNC(=O)C1=CC2=NC(=C(NCC(C)=C)N2C=C1)C1=C(C)N=CC(F)=C1<br> c:17,20,23,26,t:4,6,8                           | Z8873684779 | 1{69}  | CNC(=O)c1ccnc(N)c1    | 2{710} | Cc1ncc(F)cc1C=O                 | 3{46} | CC(=C)C[N+]#[C-]                | 40.9 | 43 |
| 1493 | 4{99,382,34}  | COC(C)(C)CC1=C(NCC2CCCO2)N2C=C(C=CC2=N1)S(N)(=O)=O  c:6,17,19,22                                          | Z8878918441 | 1{99}  | Nc1ccc(en1)S(=O)(=O)N | 2{382} | COC(C)(C)C=C=O                  | 3{34} | [C-]<br>#[N+]CC1C<br>CCO1       | 44.2 | 43 |
| 1494 | 4{431,711,10} | CC1=C(N=C2C=CC=CC2=N1)C1=C(NC2CCOC2)N2C=C(F)C=CC2=N1<br> c:5,7,10,13,26,29,t:1,3,23                       | Z8855619764 | 1{431} | Nc1ccc(F)c1n1         | 2{711} | Cc1nc2ccccc2nc1C=O              | 3{10} | [C-]<br>#[N+]C1CC<br>OC1        | 42.0 | 43 |
| 1495 | 4{32,356,14}  | COCCNC1=C(N=C2C=C(C=CN12)P(C)(C)=O)C1=CN(CC(C)C)N=N1  c:9,11,27,t:5,7,20                                  | Z8835022892 | 1{32}  | CP(=O)(C)c1ccnc(N)c1  | 2{356} | CC(C)Cn1cc(C=O)nn1              | 3{14} | COCC[N+]#[C-]                   | 45.1 | 43 |
| 1496 | 4{459,424,5}  | COCCNC1=C(N=C2C=CC(OC3=CN=CC=C3)=CN12)C1=NN(C)C(=N1)C(F)F<br> c:10,16,18,20,29,t:6,8,14,25                | Z8855739211 | 1{459} | Nc1ccc(Oc2ccnc2)cn1   | 2{424} | Cn1nc(C=O)nc1C(F)F              | 3{5}  | COCCC[N+]#[C-]                  | 51.5 | 43 |
| 1497 | 4{113,538,6}  | CCOC(=O)CCNC1=C(N=C2N1C=CC=C2N1CCOCC1)C1=CN=CN1C  c:11,15,17,29,t:9,27                                    | Z8873684619 | 1{113} | Nc1ncccc1N2CCOCC2     | 2{538} | Cn1cnc1C=O                      | 3{6}  | CCOC(=O)C<br>CC[N+]#[C-]        | 47.5 | 43 |

|      |               |                                                                                                                     |             |        |                                |        |                             |       |                                               |      |    |
|------|---------------|---------------------------------------------------------------------------------------------------------------------|-------------|--------|--------------------------------|--------|-----------------------------|-------|-----------------------------------------------|------|----|
| 1498 | 4{62,469,6}   | CCOC(=O)CCNC1=C(N=C2C=C(CO)C=CN12)C1CCSC1  c:17,t:9,11,13                                                           | Z8873684937 | 1{62}  | Nc1cc(CO)c<br>cn1              | 2{469} | O=CC1CCS<br>C1              | 3{6}  | CCOC(=O)C<br>CC[N+]#[C-]                      | 41.8 | 43 |
| 1499 | 4{103,293,5}  | COCCNC1=C(N=C2C=NC=C(CO)N12)C1=C(F)N(C)N=C1  c:10,19,24,t:6,8,12                                                    | Z8873684766 | 1{103} | Nc1cncc(C<br>O)n1              | 2{293} | Cn1ncc(C=O<br>)c1F          | 3{5}  | COCCC[N+]<br>#[C-]                            | 38.1 | 42 |
| 1500 | 4{125,712,31} | CSCCNC1=C(N=C2C=CC(CCO)=CN12)C1C<br>COC2(CCOC2)C1  c:9,14,t:5,7                                                     | Z8855739254 | 1{125} | Nc1ccc(CC<br>O)cn1             | 2{712} | O=CC1CCO<br>C2(CCOC2<br>)C1 | 3{31} | CSCC[N+]#[<br>C-]                             | 46.2 | 42 |
| 1501 | 4{46,17,9}    | CCOC1=CN=C(N=C1)C1=C(NC)N2C=CC=C<br>C2=N1  c:5,7,10,15,17,20,t:3                                                    | Z8873684778 | 1{46}  | Nc1cccn1                       | 2{17}  | CCOc1ncc(C<br>=O)nc1        | 3{9}  | C[N+]#[C-]                                    | 30.7 | 42 |
| 1502 | 4{153,155,49} | CC(C)(O)C1=CC=CC2=NC(=C(NC3CC(F)(F)<br>C3)N12)C1=CN=CN=C1  c:6,25,27,t:4,8,10,23                                    | Z8855739103 | 1{153} | CC(C)(O)c1<br>cccc(N)n1        | 2{155} | O=Cc1cnnc<br>1              | 3{49} | FC1(F)CC(C<br>1)[N+]#[C-]                     | 40.9 | 42 |
| 1503 | 4{119,34,48}  | CC(C)(C)OC(=O)N1CCCC(C1)NC1=C(N=C2<br>C=CC(=CN12)C#N)C1=CC=C(C=C1)P(C)(C)<br>=O  c:19,21,30,32,t:15,17,28           | Z8878918824 | 1{119} | Nc1ccc(C#<br>N)cn1             | 2{34}  | CP(=O)(C)c1<br>ccc(C=O)cc1  | 3{48} | CC(C)(C)OC<br>(=O)N1CCC<br>C(C1)[N+]#[<br>C-] | 56.1 | 42 |
| 1504 | 4{103,713,73} | CCN1N=C(Br)C(=N1)C1=C(NC2=C(OC)C=C<br>(OC)C=C2)N2C(C=NC=C2CO)=N1<br> c:6,9,12,20,25,27,31,t:3,16                    | Z8873684774 | 1{103} | Nc1cncc(C<br>O)n1              | 2{713} | CCn1nc(Br)c<br>(C=O)n1      | 3{73} | COc1ccc([N<br>+]#[C-]<br>])c(OC)c1            | 53.7 | 42 |
| 1505 | 4{327,185,65} | COC(=O)C1=C(F)C2=NC(C3=CN(C)C=N3)=<br>C(NC3CCCC3)N2C=C1  c:4,14,27,t:7,10,16                                        | Z8854581146 | 1{327} | COC(=O)c1<br>ccnc(N)c1F        | 2{185} | Cn1ncc(C=O<br>)c1           | 3{65} | [C-]<br>]#[N+]C1CC<br>CC1                     | 40.4 | 42 |
| 1506 | 4{118,417,31} | CSCCNC1=C(N=C2C=CC=C(C(C)O)N12)C1<br>=C2N=NN(C)C2=CC=C1<br> c:9,19,21,26,28,t:5,7,11                                | Z8873684753 | 1{118} | Cl.CC(O)c1<br>cccc(N)n1        | 2{417} | Cn1nnc2c(C<br>=O)cccc12     | 3{31} | CSCC[N+]#[<br>C-]                             | 43.2 | 42 |
| 1507 | 4{185,56,8}   | COC(=O)C(CC1=CC=CC=C1)NC1=C(N=C2C<br>=CC(=C(C)N12)S(C)(=O)=O)C1=C(C)C=NC(<br>F)=C1  c:8,10,18,30,33,36,t:6,14,16,20 | Z8873684859 | 1{185} | Cc1nc(N)cc<br>c1S(=O)(=O<br>)C | 2{56}  | Cc1ncc(F)cc<br>1C=O         | 3{8}  | COC(=O)C(<br>Cc1cccc1)[<br>N+]#[C-]           | 56.1 | 42 |
| 1508 | 4{50,153,18}  | CC(C)(C)NC1=C(N=C2C=CC=C(N12)P(C)(C)<br>=O)C1=CN(CC(F)(F)F)N=N1<br> c:9,11,28,t:5,7,20                              | Z8873684854 | 1{50}  | CP(=O)(C)c<br>1cccc(N)n1       | 2{153} | FC(F)(F)Cn1<br>cc(C=O)nn1   | 3{18} | CC(C)(C)[N<br>+]#[C-]                         | 46.8 | 42 |
| 1509 | 4{32,714,18}  | CC(C)OC1=C(F)C=C(C=C1)C1=C(NC(C)(C)<br>C)N2C=CC(=CC2=N1)P(C)(C)=O<br> c:4,7,9,12,20,22,25                           | Z8878918552 | 1{32}  | CP(=O)(C)c<br>1ccnc(N)c1       | 2{714} | CC(C)Oc1cc<br>c(C=O)cc1F    | 3{18} | CC(C)(C)[N<br>+]#[C-]                         | 47.1 | 42 |

|      |               |                                                                                               |             |        |                            |        |                           |       |                            |      |    |
|------|---------------|-----------------------------------------------------------------------------------------------|-------------|--------|----------------------------|--------|---------------------------|-------|----------------------------|------|----|
| 1510 | 4{358,223,15} | CCNC1=C(N=C2C=C(C=CN12)C(C)(C)O)C1=CN=C(C=C1)C(=O)OC  c:7,9,20,22,t:3,5,18                    | Z8873684855 | 1{358} | CC(C)(O)c1ccnc(N)c1        | 2{223} | Cl.COC(=O)c1ccc(C=O)c n1  | 3{15} | CC[N+]#[C-]                | 40.0 | 42 |
| 1511 | 4{386,549,5}  | COCCNC1=C(N=C2C=C(C)C=CN12)C1=C(C)C=C(N=C1)C(=O)OC  c:13,18,21,23,t:6,8,10                    | Z8873685491 | 1{386} | Cc1ccnc(N)c1               | 2{549} | COC(=O)c1cc(C)(C=C(O)c n1 | 3{5}  | COCC[N+]#[C-]              | 41.4 | 42 |
| 1512 | 4{180,212,32} | COC(=O)C1=CC2=NC(=C(NC3CCC3)N2C=C1C)C1=NOC(=C1)C(F)F  c:18,25,t:4,6,8,22                      | Z8878918640 | 1{180} | COC(=O)c1cc(N)nc1C         | 2{212} | FC(F)c1cc(C=O)no1         | 3{32} | [C-]#[N+]C1CC C1           | 42.2 | 41 |
| 1513 | 4{105,715,57} | NC(=O)C1=CC=CC2=NC(CC3CCOCC3)=C(NCC3=CC=CC=C3)N12  c:5,23,25,t:3,7,17,21                      | Z8854581144 | 1{105} | NC(=O)c1ccc(N)n1           | 2{715} | O=CCC1CC OCC1             | 3{57} | [C-]#[N+]Cc1ccc ccl        | 40.8 | 41 |
| 1514 | 4{83,716,18}  | CC(C)N(C)C1=NC=C(C=C1)C1=C(NC(C)(C)C)N2C=C(C=CC2=N1)P(C)(C)=O  c:7,9,12,20,22,25,t:5          | Z8878918500 | 1{83}  | CP(=O)(C)c1ccc(N)nc1       | 2{716} | CC(C)N(C)c1ccc(C=O)en 1   | 3{18} | CC(C)(C)[N+]#[C-]          | 46.3 | 41 |
| 1515 | 4{28,153,7}   | FC(F)(F)CN1C=C(N=N1)C1=C(NC2CCOCC2)N2C=CC(=CC2=N1)C1=NOC=N1  c:6,8,11,22,24,27,33,t:30        | Z8878918496 | 1{28}  | Cl.Nc1cc(cc n1)c2ncon2     | 2{153} | FC(F)(F)Cn1 cc(C=O)nn1    | 3{7}  | [C-]#[N+]C1CC OCC1         | 48.6 | 41 |
| 1516 | 4{32,717,18}  | COC1=CC(=CC=C1)C1=NC(=CS1)C1=C(NC(C)(C)C)N2C=CC(=CC2=N1)P(C)(C)=O  c:4,6,11,15,23,25,28,t:2,9 | Z8837933157 | 1{32}  | CP(=O)(C)c1ccnc(N)c1       | 2{717} | COc1cccc(c1)c2nc(C=O)c s2 | 3{18} | CC(C)(C)[N+]#[C-]          | 50.7 | 41 |
| 1517 | 4{183,148,51} | COC1=C(C(C)=NN1C)C1=C(NCCNC(=O)OC(C)(C)C)N2C(=N1)C(OC)=CC=C2C  c:5,10,24,29,31,t:2            | Z8835022879 | 1{183} | COc1ccc(C)nc1N             | 2{148} | COc1c(C=O)c(C)nn1C        | 3{51} | CC(C)(C)OC(=O)NCC[N+]#[C-] | 49.6 | 41 |
| 1518 | 4{79,26,9}    | CNC1=C(CCC2=CC=CC=C2)N=C2C=NC=C(C)N12  c:2,8,10,15,t:6,13,17                                  | Z8837933185 | 1{79}  | Cc1nccc(N)n1               | 2{26}  | O=CCCc1ccc ccl            | 3{9}  | C[N+]#[C-]                 | 29.5 | 41 |
| 1519 | 4{52,683,14}  | COCCNC1=C(N=C2C=CC(=CN12)C1(CC1)C(F)(F)F)C1=C(C)N(C)N=C1Br  c:9,11,24,29,t:5,7                | Z8854581180 | 1{52}  | Nc1ccc(en1)C2(CC2)C(F)(F)F | 2{683} | Cc1c(C=O)c(Br)nn1C        | 3{14} | COCC[N+]#[C-]              | 52.3 | 41 |
| 1520 | 4{149,317,7}  | CCN1N=CC(=N1)C1=C(NC2CCOCC2)N2C=C(Cl)C=C(Br)C2=N1  c:3,5,8,26,t:19,22                         | Z8878918369 | 1{149} | Nc1ncc(Cl)cc1Br            | 2{317} | CCn1ncc(C=O)n1            | 3{7}  | [C-]#[N+]C1CC OCC1         | 47.1 | 41 |
| 1521 | 4{101,707,14} | COCCNC1=C(N=C2N1C=C(CO)C=C2Cl)C1=NC(=NC=C1)N(C)C  c:7,15,21,23,t:5,11,19                      | Z8878918821 | 1{101} | Nc1ncc(CO)cc1Cl            | 2{707} | CN(C)c1nccc(C=O)n1        | 3{14} | COCC[N+]#[C-]              | 41.7 | 41 |
| 1522 | 4{187,567,12} | CN1N=C2CCCC2=C1C1=C(NCC2CCOC2)N2C=C(Cl)C(=CC2=N1)C#N  c:8,11,25,28,t:2,22                     | Z8878918514 | 1{187} | Nc1cc(C#N)c(Cl)en1         | 2{567} | Cn1nc2CCCCc2c1C=O         | 3{12} | [C-]#[N+]CC1C COC1         | 43.9 | 41 |

|      |               |                                                                                                      |             |        |                          |        |                                    |       |                                      |      |    |
|------|---------------|------------------------------------------------------------------------------------------------------|-------------|--------|--------------------------|--------|------------------------------------|-------|--------------------------------------|------|----|
| 1523 | 4{142,319,21} | CC1=C(C=CC(OCC#N)=C1)C1=C(NCC2CC2)N2C=CC=C(OCCS(C)(=O)=O)C2=N1<br> c:3,9,12,21,33,t:1,23             | Z8878918666 | 1{142} | CS(=O)(=O)CCOc1cccnc1N   | 2{319} | Cc1cc(OCC#N)ccc1C=O                | 3{21} | [C-]#[N+]CC1C<br>C1                  | 50.3 | 41 |
| 1524 | 4{32,604,18}  | CCN1N=C(C2=C1C=CC=C2)C1=C(NC(C)(C)C)N2C=CC(=CC2=N1)P(C)(C)=O<br> c:3,5,8,10,13,21,23,26              | Z8837933166 | 1{32}  | CP(=O)(C)c1ccnc(N)c1     | 2{604} | CCn1nc(C=O)c2cccc12                | 3{18} | CC(C)(C)[N+]<br>]#[C-]               | 45.3 | 41 |
| 1525 | 4{460,690,10} | CC1=CC=CN2C(NC3CCOC3)=C(CCC3(CCN(C)C3)C(=O)OC(C)(C)C)C#N)N=C12<br> c:3,t:1,13,33                     | Z8873685453 | 1{460} | Cc1ccnc1N                | 2{690} | CC(C)(C)OC(=O)N1CCC(CCC=O)(CC1)C#N | 3{10} | [C-]#[N+]C1CC<br>OC1                 | 50.0 | 41 |
| 1526 | 4{461,217,62} | COC(=O)C1(CCCC1)NC1=C(N=C2C=C(C#N)C(Br)=CN12)C1=CC(=O)N(C)C=C1<br> c:20,31,t:11,13,15,25             | Z8878918323 | 1{461} | Nc1cc(C#N)c(Br)cn1       | 2{217} | Cn1ccc(C=O)cc1=O                   | 3{62} | COC(=O)C1(CCCC1)[N+]<br>#[C-]        | 51.7 | 41 |
| 1527 | 4{377,662,24} | COC1=CC(CNC2=C(N=C3N2C=CC=C3OCC(F)F)C2=CC(=CC=C2)P(C)(C)=O)=CC=C1<br> c:9,13,15,25,27,33,35,t:2,7,23 | Z8878918896 | 1{377} | Nc1ncccc1OCC(F)F         | 2{662} | CP(=O)(C)c1cccc(C=O)c1             | 3{24} | COc1cccc(C[N+]<br>#[C-])c1           | 53.2 | 41 |
| 1528 | 4{172,320,29} | CCOC(=O)CCNC1=C(N=C2N1C=CC1=C2CCO1)C1=NN(C)C=N1  c:10,14,16,27,t:8,23                                | Z8873684906 | 1{172} | Nc1nccc2OCCc21           | 2{320} | Cn1enc(C=O)n1                      | 3{29} | CCOC(=O)C<br>C[N+]<br>#[C-]          | 39.0 | 41 |
| 1529 | 4{396,324,70} | CN1C=C(C=N1)C1=NN2C(C=C1)=NC(C1CC3(C1)CCCO3)=C2NC1CCN(C1)C(=O)OC(C)(C)C  c:2,4,11,13,25,t:7          | Z8873684660 | 1{396} | Cn1cc(en1)c2ccc(N)nm2    | 2{324} | O=CC1CC2(C1)CCCO2                  | 3{70} | CC(C)(C)OC(=O)N1CCC(C1)[N+]<br>#[C-] | 54.0 | 41 |
| 1530 | 4{68,13,38}   | CC1=C(N=NN1)C1=C(NC2=CC3=C(OCO3)C=C2)N2C=CC(=CC2=N1)C#C<br> c:3,7,18,22,24,27,t:1,10,12              | Z8837933156 | 1{68}  | Nc1cc(C#C)ccn1           | 2{13}  | Cc1[nH]nnc1C=O                     | 3{38} | [C-]#[N+]c1ccc<br>2OCOc2c1           | 39.3 | 40 |
| 1531 | 4{54,718,37}  | COC(=O)C1CC(C1)NC1=C(N=C2C=CC(=CN12)C(=O)N(C)C)C1=C(Br)C=CS1<br> c:14,16,26,29,t:10,12               | Z8878918615 | 1{54}  | Cl.CN(C)C(=O)c1ccc(N)nc1 | 2{718} | Brclccsc1C=O                       | 3{37} | COC(=O)C1CC(C1)[N+]<br>#[C-]         | 52.1 | 40 |
| 1532 | 4{327,47,34}  | COC(=O)C1=C(F)C2=NC(CCOCC=C)=C(NC3CCCO3)N2C=C1  c:4,27,t:7,15                                        | Z8855739171 | 1{327} | COC(=O)c1ccnc(N)c1F      | 2{47}  | C=CCOCCC=O                         | 3{34} | [C-]#[N+]CC1C<br>CCO1                | 41.1 | 40 |
| 1533 | 4{73,29,11}   | CCN1C=CC(=N1)C1=C(NCC2=CC(Br)=CC=C2)N2N3C=CN=C3C=CC2=N1<br> c:3,5,8,15,17,22,24,27,30,t:12           | Z8873685497 | 1{73}  | Nc1ccc2nccn2n1           | 2{29}  | CCn1ccc(C=O)n1                     | 3{11} | Brclcccc(C[N+]<br>#[C-])c1           | 47.5 | 40 |
| 1534 | 4{434,189,26} | CC(F)(F)C1=CN2C(NCC3=CC=C(F)C=C3)=C(N=C2C=C1)C1=CN(N=N1)C1CCOCC1<br> c:15,17,19,22,28,t:4,10,12,25   | Z8878918893 | 1{434} | CC(F)(F)c1ccc(N)nc1      | 2{189} | O=Cc1en(nn1)C2CCOCC2               | 3{26} | Fc1ccc(C[N+]<br>#[C-])cc1            | 49.6 | 40 |

|      |               |                                                                                                  |             |        |                              |        |                                    |       |                        |      |    |
|------|---------------|--------------------------------------------------------------------------------------------------|-------------|--------|------------------------------|--------|------------------------------------|-------|------------------------|------|----|
| 1535 | 4{101,192,14} | COCCNC1=C(N=C2N1C=C(CO)C=C2Cl)C1=NC(OC)=CC=C1  c:7,15,23,25,t:5,11,19                            | Z8878918840 | 1{101} | Nc1ncc(CO)cc1Cl              | 2{192} | COc1cccc(C=O)n1                    | 3{14} | COCC[N+]#[C-]          | 39.3 | 40 |
| 1536 | 4{38,420,9}   | CNC1=C(CC(C)(C)C#N)N=C2C=C(C=CN12)C#N  c:2,12,14,t:10                                            | Z8854581149 | 1{38}  | Nc1cc(C#N)ccn1               | 2{420} | CC(C)(CC=O)C#N                     | 3{9}  | C[N+]#[C-]             | 27.3 | 40 |
| 1537 | 4{327,638,34} | COC(=O)C1=C(F)C2=NC(=C(NCC3CCCO3)N2C=C1)C1=CN(CC2CCOCC2)N=C1  c:4,21,35,t:7,9,24                 | Z8878918578 | 1{327} | COC(=O)c1ccnc(N)c1F          | 2{638} | O=Cc1cnn(C2CCOCC2)c1               | 3{34} | [C-]#[N+]CC1COCO1      | 49.3 | 40 |
| 1538 | 4{456,189,18} | CC(C)(C)NC1=C(N=C2C=C(OCCNC(=O)OC(C)(C)C)C=CN12)C1=CN(N=N1)C1CCOCC1  c:22,30,t:5,7,9,27          | Z8878918782 | 1{456} | CC(C)(C)OC(=O)NCCOc1cnc(N)c1 | 2{189} | O=Cc1cn(nn1)C2CCOCC2               | 3{18} | CC(C)(C)[N+]#[C-]      | 53.7 | 40 |
| 1539 | 4{105,434,29} | CCOC(=O)CCNC1=C(N=C2C=CC=C(N12)C(N)=O)C1=NC(C)=CC(OC)=C1  c:12,14,25,29,t:8,10,22                | Z8878918662 | 1{105} | NC(=O)c1cccc(N)n1            | 2{434} | COc1cc(C)nc(C=O)c1                 | 3{29} | CCOC(=O)C[N+]#[C-]     | 42.7 | 40 |
| 1540 | 4{83,50,18}   | CC(C)(C)NC1=C(N=C2C=CC(=CN12)P(C)(C)=O)[C@@H]1C[C@H]1C1OCCO1  &1:18,20,r,c:9,11,t:5,7            | Z8878918397 | 1{83}  | CP(=O)(C)c1ccc(N)nc1         | 2{50}  | O=C[C@@H]1C[C@H]1C2OCCO2  &1:2,4,r | 3{18} | CC(C)(C)[N+]#[C-]      | 40.5 | 40 |
| 1541 | 4{73,142,13}  | COC1=CC=C(CNC2=C(N=C3C=CC4=NC=C(N4N23)C2=C(CCC=C)C=CC=C2)C=C1  c:12,16,23,29,31,34,t:2,4,8,10,14 | Z8855739261 | 1{73}  | Nc1ccc2nccn2n1               | 2{142} | C=CCCc1ccc(C=O)cc1                 | 3{13} | COc1ccc(C[N+]#[C-])cc1 | 45.4 | 40 |
| 1542 | 4{360,564,29} | CCOC(=O)CCNC1=C(N=C2C=C(C(=O)OC)C(Br)=CN12)C1=CN=NN1C  c:19,26,t:8,10,12,24                      | Z8878918408 | 1{360} | COC(=O)c1cc(N)nc1Br          | 2{564} | Cn1ncc1C=O                         | 3{29} | CCOC(=O)C[N+]#[C-]     | 48.3 | 40 |
| 1543 | 4{36,170,9}   | CCN1N=NC(=N1)C1=C(NC)N2C=C(Br)C=C2=N1  c:3,5,8,16,19,t:13                                        | Z8873685407 | 1{36}  | Nc1ccc(Br)cn1                | 2{170} | CCn1nnc(C=O)n1                     | 3{9}  | C[N+]#[C-]             | 34.4 | 40 |
| 1544 | 4{48,719,22}  | CS(=O)(=O)C1=CC2=NC(=C(NC3COC3)N2C=C1)C1=C(Cl)C=C(Br)C=C1  c:18,21,27,t:4,6,8,24                 | Z8873684833 | 1{48}  | CS(=O)(=O)c1ccnc(N)c1        | 2{719} | Clc1cc(Br)cc1C=O                   | 3{22} | [C-]#[N+]C1CO1         | 48.6 | 39 |
| 1545 | 4{83,720,26}  | CC[C@@H]1C[C@H]1C1=C(NCC2=CC=C(F)C=C2)N2C=C(C=CC2=N1)P(C)(C)=O  &1:2,4,r,c:6,15,19,21,24,t:10,12 | Z8837933151 | 1{83}  | CP(=O)(C)c1ccc(N)nc1         | 2{720} | CC[C@@H]1C[C@H]1C=O  &1:2,4,r      | 3{26} | Fe1ccc(C[N+]#[C-])cc1  | 40.9 | 39 |
| 1546 | 4{175,405,12} | CC(F)(F)C1=NC=C(S1)C1=C(NCC2CCOC2)N2C=CC=C(OCFF)C2=N1  c:6,10,21,30,t:4,23                       | Z8878918883 | 1{175} | Nc1ncccc1OCCF                | 2{405} | CC(F)(F)c1ncc(C=O)s1               | 3{12} | [C-]#[N+]CC1COCO1      | 45.3 | 39 |

|      |               |                                                                                                    |             |        |                        |        |                           |       |                                  |      |    |
|------|---------------|----------------------------------------------------------------------------------------------------|-------------|--------|------------------------|--------|---------------------------|-------|----------------------------------|------|----|
| 1547 | 4{32,640,18}  | CC(C)N1C=C(N=N1)C1=C(NC(C)(C)C)N2C=CC(=CC2=N1)P(C)(C)=O  c:4,6,9,17,19,22                          | Z8837933170 | 1{32}  | CP(=O)(C)c1ccnc(N)c1   | 2{640} | CC(C)n1cc(C=O)nn1         | 3{18} | CC(C)(C)[N+][C-]                 | 39.7 | 39 |
| 1548 | 4{462,352,70} | COCCCC1=C(NC2CCN(C2)C(=O)OC(C)(C)C)N2C=C(Br)C=C(CO)C2=N1  c:5,30,t:22,25                           | Z8873684582 | 1{462} | Nc1ncc(Br)cc1CO        | 2{352} | COCCCC=O                  | 3{70} | CC(C)(C)OC(=O)N1CCCC(C1)[N+][C-] | 51.3 | 39 |
| 1549 | 4{32,439,7}   | COC1=C(C=CC(=C1)C1=C(NC2CCOCC2)N2C=CC(=CC2=N1)P(C)(C)=O)S(C)(=O)=O  c:4,6,9,20,22,25,t:2           | Z8873684658 | 1{32}  | CP(=O)(C)c1ccnc(N)c1   | 2{439} | COe1cc(C=O)ccc1S(=O)(=O)C | 3{7}  | [C-][N+]C1CCOCC1                 | 50.7 | 39 |
| 1550 | 4{372,721,12} | COC(=O)C1=CC(=CN=C1)C1=C(NCC2CCOC2)N2C=CC=C(OCC3=CC=NC=C3)C2=N1  c:6,8,11,22,30,32,36,t:4,24,28    | Z8878918479 | 1{372} | Nc1ncccc1OCc2ccncc2    | 2{721} | COC(=O)c1cncc(C=O)c1      | 3{12} | [C-][N+]CC1COC1                  | 48.7 | 39 |
| 1551 | 4{193,722,12} | CNC(=O)C1=CN2C(C=C1)=NC(=C2NCC1CCOC1)C1=CC=C(C=C1)N1CCN(C)CC1  c:8,10,12,25,27,t:4,23              | Z8849597829 | 1{193} | CNC(=O)c1ccc(N)nc1     | 2{722} | CN1CCN(C1)c2ccc(C=O)cc2   | 3{12} | [C-][N+]CC1COC1                  | 47.6 | 39 |
| 1552 | 4{123,689,22} | CC(=O)OCCN1C=C(C=N1)C1=C(NC2COC2)N2C=CC(OCCO)=CC2=N1  c:7,9,12,21,27,30                            | Z8878918424 | 1{123} | Cl.Nc1cc(OCCO)ccn1     | 2{689} | CC(=O)OCCn1cc(C=O)en1     | 3{22} | [C-][N+]C1CO C1                  | 38.9 | 39 |
| 1553 | 4{73,723,13}  | CCCC(C)C1=C(NCC2=CC=C(OC)C=C2)N2N3C=CN=C3C=CC2=N1  c:5,15,20,22,25,28,t:9,11                       | Z8854581156 | 1{73}  | Nc1ccc2nccn2n1         | 2{723} | CCCC(C)C=O                | 3{13} | COe1ccc(C[N+][C-])cc1            | 38.4 | 39 |
| 1554 | 4{83,340,18}  | CCN1C=NC(=N1)C1=C(NC(C)(C)C)N2C=C(C=CC2=N1)P(C)(C)=O  c:3,5,8,16,18,21                             | Z8878918361 | 1{83}  | CP(=O)(C)c1ccc(N)nc1   | 2{340} | CCn1cnc(C=O)n1            | 3{18} | CC(C)(C)[N+][C-]                 | 38.1 | 39 |
| 1555 | 4{144,724,15} | CCNC1=C(N=C2C=CC(=CN12)S(=O)(=O)NC)C1=C(OC)C=CC=C1F  c:7,9,19,23,25,t:3,5                          | Z8873684668 | 1{144} | CNS(=O)(=O)c1ccc(N)nc1 | 2{724} | COc1cccc(F)c1C=O          | 3{15} | CC[N+][C-]                       | 40.0 | 39 |
| 1556 | 4{133,61,22}  | CS(=O)C1=CC=C(C=C1)C1=C(NC2COC2)N2C=C(F)C=C(Br)C2=N1  c:5,7,10,26,t:3,19,22                        | Z8873684901 | 1{133} | Nc1ncc(F)cc1Br         | 2{61}  | CS(=O)c1ccc(C=O)cc1       | 3{22} | [C-][N+]C1CO C1                  | 44.5 | 39 |
| 1557 | 4{393,725,5}  | CCN1N=NC=C1C1=C(NCCCOC)N2C(C=CC(Cl)=C2Cl)=N1  c:3,5,8,18,21,24                                     | Z8878918309 | 1{393} | Nc1ccc(Cl)c(Cl)n1      | 2{725} | CCn1ncc1C=O               | 3{5}  | COCCC[N+][C-]                    | 38.6 | 39 |
| 1558 | 4{372,726,12} | CS(=O)(=O)C1=CC(=CC=C1)C1=C(NCC2CCOC2)N2C=CC=C(OCC3=CC=NC=C3)C2=N1  c:6,8,11,22,30,32,36,t:4,24,28 | Z8878918471 | 1{372} | Nc1ncccc1OCc2ccncc2    | 2{726} | CS(=O)(=O)c1cccc(C=O)c1   | 3{12} | [C-][N+]CC1COC1                  | 49.9 | 39 |



|      |               |                                                                                                              |             |        |                          |        |                          |       |                                 |      |    |
|------|---------------|--------------------------------------------------------------------------------------------------------------|-------------|--------|--------------------------|--------|--------------------------|-------|---------------------------------|------|----|
| 1559 | 4{347,536,46} | CC(=C)CNC1=C(N=C2C=CC(Cl)=CN12)C1=CN=C(O1)C1CCOCC1  c:9,12,19,t:5,7,17                                       | Z8849597802 | 1{347} | Nc1ccc(Cl)cn1            | 2{536} | O=Cc1enc(o1)C2CCOCC2     | 3{46} | CC(=C)C[N+][C-]                 | 38.6 | 38 |
| 1560 | 4{366,721,10} | COC(=O)C1=CC(=CN=C1)C1=C(NC2CCOC2)N2C=CC=C(OC)C2=N1  c:6,8,11,21,28,t:4,23                                   | Z8849597815 | 1{366} | COc1cccnc1N              | 2{721} | COC(=O)c1cncc(C=O)c1     | 3{10} | [C-][N+]C1CCOC1                 | 38.1 | 38 |
| 1561 | 4{212,155,76} | COCC1=CN2C(C=C1)=NC(=C2NC1CN(C1)C(=O)OC(C)(C)C)C1=CN=CN=C1  c:7,9,11,29,31,t:3,27                            | Z8873684912 | 1{212} | Cl.COCc1ccc(N)nc1        | 2{155} | O=Cc1encnc1              | 3{76} | CC(C)(C)OC(=O)N1CC(C1)[N+]#[C-] | 42.4 | 38 |
| 1562 | 4{146,180,51} | CC(C)(C)OC(=O)NCCNC1=C(CCCCCF)N=C2C=CC(=CN12)S(C)(=O)=O  c:11,21,23,t:19                                     | Z8878918796 | 1{146} | CS(=O)(=O)c1ccc(N)nc1    | 2{180} | FCCCCC=O                 | 3{51} | CC(C)(C)OC(=O)NCC[N+]#[C-]      | 45.7 | 38 |
| 1563 | 4{79,25,20}   | COC1=CC(C)=C(NC2=C(N=C3C=NC=C(C)N23)C2=CN=C(N=C2)C2CCOCC2)C=C1  c:12,22,24,34,t:2,5,8,10,14,20               | Z8878918845 | 1{79}  | Cc1encnc(N)n1            | 2{25}  | O=Cc1enc(nc1)C2CCOCC2    | 3{20} | COc1ccc([N+]#[C-])c(C)c1        | 44.3 | 38 |
| 1564 | 4{47,727,6}   | CCOC(=O)CCNC1=C(N=C2C=C(C=CN12)S(N)(=O)=O)C1=CN=C(N=C1)C(C)C  c:13,15,26,28,t:9,11,24                        | Z8849597798 | 1{47}  | Cl.Nc1cc(ccn1)S(=O)(=O)N | 2{727} | CC(C)c1ncc(C=O)cn1       | 3{6}  | CCOC(=O)CC[N+]#[C-]             | 45.9 | 38 |
| 1565 | 4{79,728,9}   | CNC1=C(N=C2C=NC=C(C)N12)C1=CN=C(S1)C1CCC1  c:6,16,t:2,4,8,14                                                 | Z8878918882 | 1{79}  | Cc1encnc(N)n1            | 2{728} | O=Cc1enc(s1)C2CCC2       | 3{9}  | C[N+]#[C-]                      | 30.6 | 38 |
| 1566 | 4{91,555,26}  | CC1=NN(C(C)=C1)C1=C(NCC2=CC=C(F)C=C2)N2C=C(C=CC2=N1)C(N)=O)C1=NC=CC=C1  c:5,8,17,21,23,26,34,36,t:1,12,14,32 | Z8873684863 | 1{91}  | NC(=O)c1ccc(N)nc1        | 2{555} | Cc1nn(c(C)c1C=O)e2ccccn2 | 3{26} | Fe1ccc(C[N+]#[C-])cc1           | 46.6 | 38 |
| 1567 | 4{59,729,49}  | COC1=C(C=CC=C1C#N)C1=C(NC2CC(F)(F)C2)N2C=C(CN3CCOCC3)C=CC2=N1  c:4,6,11,32,35,t:2,22                         | Z8873684701 | 1{59}  | Nc1ccc(CN2CCOCC2)cn1     | 2{729} | COc1c(C=O)cccc1C#N       | 3{49} | FC1(F)CC(C1)[N+]#[C-]           | 46.2 | 38 |
| 1568 | 4{239,119,37} | CCOC(=O)C1=NN=C(N1)C1=C(NC2CC(C2)C(=O)OC)N2C=C(C=CC2=N1)N1CCCC1  c:7,11,24,26,29,t:5                         | Z8873684590 | 1{239} | Cl.Cl.Nc1ccc(en1)N2CCCC2 | 2{119} | CCOC(=O)c1nncc(C=O)[nH]1 | 3{37} | COC(=O)C1CC(C1)[N+]#[C-]        | 46.1 | 38 |
| 1569 | 4{351,730,28} | CCCNC1=C(N=C2C=CC3=C(C(O)CC3)N12)C1=CN(N=C1C)C(C)(C)C  c:8,23,t:4,6,10,20                                    | Z8873684849 | 1{351} | Nc1ccc2CC(C(O)c2)n1      | 2{730} | Cc1nn(cc1C=O)C(C)(C)C    | 3{28} | CCC[N+]#[C-]                    | 37.4 | 38 |
| 1570 | 4{49,197,13}  | COC(=O)C1=CC(=NN1C)C1=C(NCC2=CC=C(OC)C=C2)N2C(C=CC=C2CO)=N1  c:6,11,21,26,28,32,t:4,15,17                    | Z8873684639 | 1{49}  | Nc1cccc(CO)n1            | 2{197} | COC(=O)c1ccc(C=O)nn1C    | 3{13} | COc1ccc(C[N+]#[C-])cc1          | 42.9 | 38 |

|      |               |                                                                                                        |             |        |                                   |        |                                             |       |                                               |      |    |
|------|---------------|--------------------------------------------------------------------------------------------------------|-------------|--------|-----------------------------------|--------|---------------------------------------------|-------|-----------------------------------------------|------|----|
| 1571 | 4{463,135,49} | CN1N=C(C)C(=C1C)C1=C(NC2CC(F)(F)C2)N2C=C(C=CC2=N1)C(=O)OC(C)(C)C<br> c:5,9,20,22,25,t:2                | Z8849597818 | 1{463} | CC(C)(C)O<br>C(=O)c1ccc<br>(N)nc1 | 2{135} | Cc1nn(C)c(C)<br>c1C=O                       | 3{49} | FC1(F)CC(C<br>1)[N+]#[C-]                     | 43.9 | 38 |
| 1572 | 4{83,731,31}  | COC1=C(C=CC(Br)=C1)C1=C(NCCSC)N2C=C(C=CC2=N1)P(C)(C)=O<br> c:4,7,10,18,20,23,t:2                       | Z8873685488 | 1{83}  | CP(=O)(C)c<br>1ccc(N)nc1          | 2{731} | COc1cc(Br)c<br>cc1C=O                       | 3{31} | CSCC[N+]#[<br>C-]                             | 47.6 | 38 |
| 1573 | 4{139,375,51} | COCC1=C(N=CO1)C1=C(NCCNC(=O)OC(C)<br>(C)C)N2C=CC(=CC2=N1)C(F)F<br> c:5,9,23,25,28,t:3                  | Z8878918813 | 1{139} | Nc1cc(ccn1<br>)C(F)F              | 2{375} | COCc1ocnc1<br>C=O                           | 3{51} | CC(C)(C)OC<br>(=O)NCC[N<br>+]#[C-]            | 44.4 | 38 |
| 1574 | 4{358,732,15} | CCNC1=C(N=C2C=C(C=CN12)C(C)(C)O)[C<br>@@H]1C[C@H]1C1CC1<br> &1:16,18,r,c:7,9,t:3,5                     | Z8878918454 | 1{358} | CC(C)(O)c1<br>ccnc(N)c1           | 2{732} | O=C[C@@H<br>]1C[C@H]1<br>C2CC2<br> &1:2,4,r | 3{15} | CC[N+]#[C-]                                   | 30.3 | 37 |
| 1575 | 4{41,733,13}  | COC1=CC=C(CNC2=C(N=C3C=NC(C)=CN2<br>3)C2=NN(N=N2)C(C)(C)C=C1<br> c:12,15,23,30,t:2,4,8,10,20           | Z8855739216 | 1{41}  | Cc1cnc(N)c<br>n1                  | 2{733} | CC(C)(C)n1n<br>nc(C=O)n1                    | 3{13} | COc1ccc(C[<br>N+]#[C-])cc1                    | 39.7 | 37 |
| 1576 | 4{83,146,18}  | C[C@@H]1C[C@@H]1CCCC1=C(NC(C)(C)C)<br>N2C=C(C=CC2=N1)P(C)(C)=O<br> &1:1,3,r,c:7,15,17,20               | Z8878918375 | 1{83}  | CP(=O)(C)c<br>1ccc(N)nc1          | 2{146} | C[C@@H]1<br>C[C@@H]1<br>CCC=O<br> &1:1,3,r  | 3{18} | CC(C)(C)[N<br>+]#[C-]                         | 35.1 | 37 |
| 1577 | 4{41,95,9}    | CNC1=C(N=C2C=NC(C)=CN12)C1=CC(=NC<br>=C1)N(C)C  c:6,9,16,18,t:2,4,14                                   | Z8855739107 | 1{41}  | Cc1cnc(N)c<br>n1                  | 2{95}  | CN(C)c1cc(<br>C=O)ccn1                      | 3{9}  | C[N+]#[C-]                                    | 28.5 | 37 |
| 1578 | 4{188,734,62} | COC(=O)C1=CN=CC2=NC(=C(NC3(CCCC3)<br>C(=O)OC)N12)C1=C(C)C(=NN1)C(F)(F)F<br> c:6,26,29,t:4,8,10         | Z8835022882 | 1{188} | COC(=O)c1<br>cnc(N)n1             | 2{734} | Cc1c(C=O)[n<br>H]nc1C(F)(F<br>)F            | 3{62} | COC(=O)C1(<br>CCCC1)[N+]<br>#[C-]             | 47.0 | 37 |
| 1579 | 4{62,94,11}   | OCC1=CC2=NC(=C(NCC3=CC(Br)=CC=C3)<br>N2C=C1)C1=NC=CN=C1<br> c:13,15,20,25,27,t:2,4,6,10,23             | Z8873684641 | 1{62}  | Nc1cc(CO)c<br>cn1                 | 2{94}  | O=Cc1cncn<br>1                              | 3{11} | Brc1cccc(C[<br>N+]#[C-])c1                    | 41.0 | 37 |
| 1580 | 4{69,369,24}  | CNC(=O)C1=CC2=NC(=C(NCC3=CC(OC)=C<br>C=C3)N2C=C1)C1=CON=C1C<br> c:16,18,23,29,t:4,6,8,12,26            | Z8878918887 | 1{69}  | CNC(=O)c1<br>ccnc(N)c1            | 2{369} | Cc1noc1C=<br>O                              | 3{24} | COc1cccc(C[<br>N+]#[C-])c1                    | 38.7 | 37 |
| 1581 | 4{359,735,22} | COC(=O)C1=CN=C(S1)C1=C(NC2COC2)N2<br>C=C(OC(F)F)C=CC2=N1  c:6,10,25,28,t:4,19                          | Z8854581181 | 1{359} | Nc1ccc(OC(<br>F)F)cn1             | 2{735} | COC(=O)c1c<br>nc(C=O)s1                     | 3{22} | [C-<br>]#[N+]C1CO<br>C1                       | 39.2 | 37 |
| 1582 | 4{174,21,43}  | CC(C)(C)OC(=O)N1CCC(CC1)NC1=C(N=C2<br>C=CC=C(C#N)N12)C1=CC2=NC=NN2C=C1<br> c:19,32,36,t:15,17,21,28,30 | Z8873685273 | 1{174} | Nc1cccc(C#<br>N)n1                | 2{21}  | O=Cc1cn2n<br>cnc2c1                         | 3{43} | CC(C)(C)OC<br>(=O)N1CCC(<br>CC1)[N+]#[<br>C-] | 45.0 | 36 |

|      |               |                                                                                                          |             |        |                       |        |                     |       |                          |      |    |
|------|---------------|----------------------------------------------------------------------------------------------------------|-------------|--------|-----------------------|--------|---------------------|-------|--------------------------|------|----|
| 1583 | 4{166,168,35} | CSCCCNC1=C(N=C2C=C(CSCCO)C=CN12)C1=NOC=C1  c:17,25,t:6,8,10,22                                           | Z8854581179 | 1{166} | Nc1cc(CSCCO)ccn1      | 2{168} | O=Cc1ccn1           | 3{35} | CSCCC[N+]#[C-]           | 36.8 | 36 |
| 1584 | 4{99,736,34}  | CC1(C)CC(C1)C1=C(NCC2CCCO2)N2C=C(C=CC2=N1)S(N)(=O)=O  c:7,18,20,23                                       | Z8835022874 | 1{99}  | Nc1ccc(en1)S(=O)(=O)N | 2{736} | CC1(C)CC(C1)C=O     | 3{34} | [C-]#[N+]CC1CCO1         | 36.8 | 36 |
| 1585 | 4{28,737,7}   | FC1=C(C=CC(=C1)C1=C(NC2CCOCC2)N2C=CC(=CC2=N1)C1=NOC=N1)C#C  c:3,5,8,19,21,24,30,t:1,27                   | Z8873684597 | 1{28}  | Cl.Nc1cc(ccn1)c2ncon2 | 2{737} | Fc1cc(C=O)cc1C#C    | 3{7}  | [C-]#[N+]C1CCOCC1        | 39.0 | 36 |
| 1586 | 4{180,168,32} | COC(=O)C1=CC2=NC(=C(NC3CCC3)N2C=C1C)C1=NOC=C1  c:18,25,t:4,6,8,22                                        | Z8878918534 | 1{180} | COC(=O)c1cc(N)nc1C    | 2{168} | O=Cc1ccn1           | 3{32} | [C-]#[N+]C1CC1           | 31.4 | 36 |
| 1587 | 4{464,390,5}  | COCCNC1=C(N=C2C=CC(=CN12)N1CCN(C)CC1)C1CC2C(C1)C2(F)F  c:10,12,t:6,8                                     | Z8855619556 | 1{464} | CN1CCN(C1)c2ccc(N)nc2 | 2{390} | FC1(F)C2CC(CC21)C=O | 3{5}  | COCC[N+]#[C-]            | 40.3 | 36 |
| 1588 | 4{367,364,34} | CC1=CN2C(NCC3CCCO3)=C(CCC3CCCO3)N=C2C(=C1)C#C  c:22,25,t:1,12                                            | Z8878918416 | 1{367} | Cc1enc(N)c(C#C)c1     | 2{364} | O=CCCC1CCO1         | 3{34} | [C-]#[N+]CC1CCO1         | 33.8 | 35 |
| 1589 | 4{73,53,20}   | COC1=CC(C)=C(NC2=C(N=C3C=CC4=NC=CN4N23)C2=C(F)C=CC(C)=N2)C=C1  c:12,16,23,26,29,32,t:2,5,8,10,14         | Z8878918602 | 1{73}  | Nc1ccc2nccn2n1        | 2{53}  | Cc1ccc(F)c(C=O)n1   | 3{20} | COc1ccc([N+]#[C-])c(C)c1 | 38.5 | 35 |
| 1590 | 4{48,99,15}   | CCNC1=C(N=C2C=C(C=CN12)S(C)(=O)=O)C1=COC=N1  c:7,9,21,t:3,5,18                                           | Z8873685462 | 1{48}  | CS(=O)(=O)c1cenc(N)c1 | 2{99}  | O=Cc1ccn1           | 3{15} | CC[N+]#[C-]              | 29.2 | 35 |
| 1591 | 4{439,148,10} | COC1=C(C(C)=NN1C)C1=C(NC2CCOC2)N2C=CC=C(OCC3=CC=CC=C3)C2=N1  c:5,10,20,28,30,34,t:2,22,26                | Z8849597809 | 1{439} | Nc1ncccc1OCc2cccc2    | 2{148} | COc1c(C=O)c(C)nn1C  | 3{10} | [C-]#[N+]C1CCOC1         | 41.3 | 35 |
| 1592 | 4{73,88,11}   | BrC1=CC(CNC2=C(N=C3C=CC4=NC=CN4N23)C2=CC3=C(C=CC=N3)C=C2)=CC=C1  c:10,14,25,27,30,32,34,t:1,6,8,12,21,23 | Z8873684895 | 1{73}  | Nc1ccc2nccn2n1        | 2{88}  | O=Cc1ccc2ccnc2c1    | 3{11} | Br1cccc(C[N+]#[C-])c1    | 44.5 | 35 |
| 1593 | 4{36,672,14}  | COCCNC1=C(N=C2C=CC(Br)=CN12)C1=C(C)SC=N1  c:9,12,17,21,t:5,7                                             | Z8846492100 | 1{36}  | Nc1ccc(Br)cn1         | 2{672} | Cc1scnc1C=O         | 3{14} | COCC[N+]#[C-]            | 34.5 | 35 |
| 1594 | 4{405,587,38} | COC1=NOC(C)=C1C1=C(NC2=CC3=C(OCO3)C=C2)N2C=C(C=CC2=N1)N1CCCC1=O  c:6,9,20,24,26,29,t:2,12,14             | Z8878918646 | 1{405} | Nc1ccc(en1)N2CCCC2=O  | 2{587} | COc1noc(C)c1C=O     | 3{38} | [C-]#[N+]c1ccc2OCOc2c1   | 42.0 | 35 |
| 1595 | 4{371,486,12} | CN1C(C1)=NC(C1)=C1C1=C(NCC2CCOC2)N2C=CC=C(OCCCC#N)C2=N1  c:3,6,9,20,31,t:22                              | Z8873684601 | 1{371} | Nc1ncccc1OCCCC#N      | 2{486} | Cn1c(Cl)nc(Cl)c1C=O | 3{12} | [C-]#[N+]CC1CCOC1        | 42.1 | 35 |

|      |               |                                                                                                           |             |        |                           |        |                            |       |                              |      |    |
|------|---------------|-----------------------------------------------------------------------------------------------------------|-------------|--------|---------------------------|--------|----------------------------|-------|------------------------------|------|----|
| 1596 | 4{185,738,29} | CCOC(=O)CCNC1=C(N=C2C=CC(=C(C)N12)S(C)(=O)=O)C1=CC(CI)=CN=C1<br> c:12,27,29,t:8,10,14,24                  | Z8855739080 | 1{185} | Cc1nc(N)cc1S(=O)(=O)C     | 2{738} | Clc1encc(C=O)c1            | 3{29} | CCOC(=O)C[C[N+][C-]]         | 40.9 | 35 |
| 1597 | 4{47,116,26}  | NS(=O)(=O)C1=CC2=NC(=C(NCC3=CC=C(F)C=C3)N2C=C1)C1=CN(CCC=C)N=N1<br> c:17,22,32,t:4,6,8,12,14,25           | Z8849597831 | 1{47}  | Cl.Nc1cc(ccn1)S(=O)(=O)N  | 2{116} | C=CCcn1cc(C=O)nn1          | 3{26} | Fc1ccc(C[N+][C-])cc1         | 41.3 | 35 |
| 1598 | 4{129,550,29} | CCOC(=O)CCNC1=C(N=C2C=CC=C(SC)N12)C1=NC(Br)=NN1C  c:12,24,t:8,10,14,21                                    | Z8873684879 | 1{129} | CSc1cccc(N)n1             | 2{550} | Cn1nc(Br)nc1C=O            | 3{29} | CCOC(=O)C[C[N+][C-]]         | 41.0 | 35 |
| 1599 | 4{206,344,14} | COCCNC1=C(N=C2N1C=CC(I)=C2F)C1=C(C)C=NN1COC  c:7,11,14,18,21,t:5                                          | Z8873684648 | 1{206} | Nc1nccc(I)c1F             | 2{344} | COc1nccc(C)c1C=O           | 3{14} | COCC[N+][C-]                 | 42.9 | 35 |
| 1600 | 4{41,161,13}  | CCN1C=NC=C1C1=C(NCC2=CC=C(OC)C=C2)N2C=C(C)N=CC2=N1<br> c:3,5,8,18,25,28,t:12,14,22                        | Z8855739127 | 1{41}  | Cc1enc(N)c1n1             | 2{161} | CCn1encc1C=O               | 3{13} | COc1ccc(C[N+][C-])cc1        | 33.8 | 35 |
| 1601 | 4{359,689,15} | CCNC1=C(N=C2C=CC(OC(F)F)=CN12)C1=CN(CCOC(C)=O)N=C1  c:7,13,27,t:3,5,18                                    | Z8873685423 | 1{359} | Nc1ccc(OC(F)F)c1n1        | 2{689} | CC(=O)OCCn1cc(C=O)cn1      | 3{15} | CC[N+][C-]                   | 35.3 | 34 |
| 1602 | 4{119,454,61} | COC(C)CC1=C(NCCCNC(=O)OC(C)(C)C)N2C=C(C=CC2=N1)C#N  c:5,20,22,25                                          | Z8878918653 | 1{119} | Nc1ccc(C#N)c1n1           | 2{454} | COC(C)CC=O                 | 3{61} | CC(C)(C)OC(=O)NCCC[N+][C-]   | 35.6 | 34 |
| 1603 | 4{109,357,41} | CCC1=C(C(C)=NO1)C1=C(NC2=CC=C(OC)C=C2)N2C(C=CC=C2S(N)(=O)=O)=N1<br> c:5,9,18,23,25,31,t:2,12,14           | Z8854581176 | 1{109} | Cl.Nc1cccc(n1)S(=O)(=O)N  | 2{357} | CCc1onc(C)c1C=O            | 3{41} | COc1ccc([N+][C-])cc1         | 39.0 | 34 |
| 1604 | 4{73,739,20}  | COC1=CC(C)=C(NC2=C(N=C3C=CC4=NC=CN4N23)C2=CC3=C(C=NN3C)C=C2)C=C1<br> c:12,16,27,32,35,t:2,5,8,10,14,23,25 | Z8855619518 | 1{73}  | Nc1ccc2nccn2n1            | 2{739} | Cn1ncc2ccc(C=O)cc12        | 3{20} | COc1ccc([N+][C-])c(C)c1      | 38.6 | 34 |
| 1605 | 4{286,740,23} | COC(=O)CCC(NC1=C(N=C2C=CC(=CN12)C1=NC=CC=C1)C1=CN(N=C1)C(F)F)C(=O)OC  c:12,14,21,23,29,t:8,10,19,26       | Z8829498781 | 1{286} | Cl.Cl.Nc1ccc(en1)c2cccen2 | 2{740} | FC(F)n1cc(C=O)c1n1         | 3{23} | COC(=O)CC(C([N+][C-])C(=O)OC | 44.1 | 34 |
| 1606 | 4{287,603,10} | COC(=O)C1=CC(=NS1)C1=C(NC2CCOC2)N2C=CC(CI)=CC2=N1  c:6,10,20,23,26,t:4                                    | Z8873685424 | 1{287} | Nc1cc(Cl)ccn1             | 2{603} | COC(=O)c1cc(C=O)ns1        | 3{10} | [C-][N+][C1CCOC1             | 34.3 | 34 |
| 1607 | 4{36,257,9}   | CNC1=C(N=C2C=CC(Br)=CN12)C1CC(C1)NC(=O)OC(C)(C)C  c:6,9,t:2,4                                             | Z8873685342 | 1{36}  | Nc1ccc(Br)c1n1            | 2{257} | CC(C)(C)OC(=O)NC1CC(C1)C=O | 3{9}  | C[N+][C-]                    | 35.7 | 33 |

|      |               |                                                                                                        |             |        |                            |        |                                           |       |                          |      |    |
|------|---------------|--------------------------------------------------------------------------------------------------------|-------------|--------|----------------------------|--------|-------------------------------------------|-------|--------------------------|------|----|
| 1608 | 4{465,741,49} | FC1(F)CC(C1)NC1=C(N=C2C=CC(=CN12)S(=O)(=O)NC1CC1)C1=CC=C(C=C1)N1C=NC=N1  c:12,14,29,31,35,37,t:8,10,27 | Z8829498651 | 1{465} | Nc1ccc(en1)S(=O)(=O)NC2CC2 | 2{741} | O=Cc1ccc(cc1)n2cncn2                      | 3{49} | FC1(F)CC(C1)[N+]#[C-]    | 43.8 | 33 |
| 1609 | 4{146,328,24} | CCC1=NNC=C1C1=C(NCC2=CC(OC)=CC=C2)N2C=C(C=CC2=N1)S(C)(=O)=O  c:5,8,16,18,22,24,27,t:2,12               | Z8878918638 | 1{146} | CS(=O)(=O)c1ccc(N)nc1      | 2{328} | Cl.CCCc1n[nH]cc1C=O                       | 3{24} | COc1cccc(C[N+]#[C-])c1   | 38.3 | 33 |
| 1610 | 4{447,135,37} | COC(=O)C1CC(C1)NC1=C(N=C2C=CC(=CN12)N(C)C)C1=C(C)N(C)N=C1C  c:14,16,24,29,t:10,12                      | Z8873684739 | 1{447} | CN(C)c1ccc(N)nc1           | 2{135} | Cc1nn(C)c(C)c1C=O                         | 3{37} | COC(=O)C1CC(C1)[N+]#[C-] | 35.6 | 33 |
| 1611 | 4{166,626,15} | CCNC1=C(N=C2C=C(CSCCO)C=CN12)C1=CC2=C(CCN(C2)C(C)=O)S1  c:14,t:3,5,7,19,21                             | Z8873684916 | 1{166} | Nc1cc(CSCCO)ccn1           | 2{626} | CC(=O)N1CCc2sc(C=O)c2C1                   | 3{15} | CC[N+]#[C-]              | 38.7 | 33 |
| 1612 | 4{460,369,21} | CC1=NOC=C1C1=C(NCC2CC2)N2C=CC=C(C)C2=N1  c:4,7,16,22,t:1,18                                            | Z8855619657 | 1{460} | Cc1cccnc1N                 | 2{369} | Cc1noc1C=O                                | 3{21} | [C-]#[N+]CC1C1           | 25.4 | 33 |
| 1613 | 4{48,742,22}  | CS(=O)(=O)C1=CC2=NC(=C(NC3COC3)N2C=C1)C1=C(F)C(Br)=CC=C1F  c:18,21,25,27,t:4,6,8                       | Z8873684860 | 1{48}  | CS(=O)(=O)c1ccnc(N)c1      | 2{742} | Fe1ccc(Br)c(F)c1C=O                       | 3{22} | [C-]#[N+]C1CO1           | 41.1 | 33 |
| 1614 | 4{41,672,13}  | COC1=CC=C(CNC2=C(N=C3C=NC(C)=CN23)C2=C(C)SC=N2)C=C1  c:12,15,20,24,27,t:2,4,8,10                       | Z8878918776 | 1{41}  | Cc1cnc(N)c1                | 2{672} | Cc1scnc1C=O                               | 3{13} | COc1ccc(C[N+]#[C-])cc1   | 32.7 | 33 |
| 1615 | 4{49,29,13}   | CCN1C=CC(=N1)C1=C(NCC2=CC=C(OC)C=C2)N2C(C=CC=C2CO)=N1  c:3,5,8,18,23,25,29,t:12,14                     | Z8878918879 | 1{49}  | Nc1cccc(C)O1               | 2{29}  | CCn1ccc(C=O)n1                            | 3{13} | COc1ccc(C[N+]#[C-])cc1   | 33.3 | 33 |
| 1616 | 4{48,115,35}  | COC1=NN(C)C(=C1)C1=C(NCCCSC)N2C=C(C=CC2=N1)S(C)(=O)=O  c:6,9,18,20,23,t:2                              | Z8873685307 | 1{48}  | CS(=O)(=O)c1ccnc(N)c1      | 2{115} | COc1cc(C=O)n(C)n1                         | 3{35} | CSCCC[N+]#[C-]           | 36.1 | 33 |
| 1617 | 4{62,49,6}    | CCOC(=O)CCNC1=C(N=C2C=C(CO)C=CN12)C1=CN=C1C  c:17,25,t:9,11,13,22                                      | Z8873684869 | 1{62}  | Nc1cc(CO)c1                | 2{49}  | Cc1n[nH]cc1C=O                            | 3{6}  | CCOC(=O)CC[N+]#[C-]      | 31.5 | 33 |
| 1618 | 4{358,87,15}  | CCNC1=C(N=C2C=C(C=CN12)C(C)(C)O)[C@@H]1C[C@H]1C(=O)OC(C)(C)C  &1:16,18,r,c:7,9,t:3,5                   | Z8878918449 | 1{358} | CC(C)(O)c1ccnc(N)c1        | 2{87}  | CC(C)(C)OC(=O)[C@@H]1C[C@H]1C=O  &1:7,9,r | 3{15} | CC[N+]#[C-]              | 31.5 | 32 |
| 1619 | 4{166,60,32}  | CC(C1CCOC1)C1=C(NC2CCC2)N2C=CC(CS)CCO)=CC2=N1  c:8,17,24,27                                            | Z8878918678 | 1{166} | Nc1cc(CSCCO)ccn1           | 2{60}  | CC(C=O)C1CCOC1                            | 3{32} | [C-]#[N+]C1CC1           | 32.9 | 32 |

|      |               |                                                                                                            |             |        |                              |        |                                     |       |                             |      |    |
|------|---------------|------------------------------------------------------------------------------------------------------------|-------------|--------|------------------------------|--------|-------------------------------------|-------|-----------------------------|------|----|
| 1620 | 4{125,92,18}  | CC1=NOC(=C1)C1=C(NC(C)(C)C)N2C=C(CO)C=CC2=N1  c:4,7,20,23,t:1,15                                           | Z8873684676 | 1{125} | Nc1ccc(CC)cn1                | 2{92}  | Cc1cc(C=O)on1                       | 3{18} | CC(C)(C)[N+]#[C-]           | 27.5 | 32 |
| 1621 | 4{109,743,34} | CCC1=NC=CC(=C1)C1=C(NCC2CCCO2)N2C(C=CC=C2S(N)(=O)=O)=N1  c:4,6,9,21,23,29,t:2                              | Z8873684764 | 1{109} | Cl.Nc1cccc(n1)S(=O)(=O)N     | 2{743} | CCc1cc(C=O)ccn1                     | 3{34} | [C-]#[N+]CC1CCO1            | 35.0 | 32 |
| 1622 | 4{32,744,31}  | CSCCNC1=C(N=C2C=C(C=CN12)P(C)(C)=O)C1=C(F)C=CC(=C1)C#C  c:9,11,20,23,25,t:5,7                              | Z8873684898 | 1{32}  | CP(=O)(C)c1ccnc(N)c1         | 2{744} | Fc1ccc(C#C)cc1C=O                   | 3{31} | CSCC[N+]#[C-]               | 35.0 | 32 |
| 1623 | 4{153,745,15} | CCNC1=C(N=C2C=CC=C(N12)C(C)(C)O)C1=C(C)C=NC=C1  c:7,9,18,21,23,t:3,5                                       | Z8878918516 | 1{153} | CC(C)(O)c1cccc(N)n1          | 2{745} | Cc1cncnc1C=O                        | 3{15} | CC[N+]#[C-]                 | 27.0 | 32 |
| 1624 | 4{466,294,5}  | COCCNC1=C(N=C2C=CC(OCCC(C)C)=NN12)C1=C(OC)C(=O)C=CO1  c:10,18,23,29,t:6,8                                  | Z8878918834 | 1{466} | CC(C)CCOc1ccc(N)nn1          | 2{294} | COc1c(C=O)occc1=O                   | 3{5}  | COCCC[N+]#[C-]              | 36.1 | 32 |
| 1625 | 4{186,746,8}  | COC(=O)C(CC1=CC=CC=C1)NC1=C(N=C2C=C(C=CN12)S(=O)(=O)N(C)C)C1=C(C)C=C N=C1  c:8,10,18,20,31,34,36,t:6,14,16 | Z8873684706 | 1{186} | Cl.CN(C)S(=O)(=O)c1ccnc(N)c1 | 2{746} | Cc1cncnc1C=O                        | 3{8}  | COC(=O)C(Cc1cccc1)[N+]#[C-] | 42.8 | 32 |
| 1626 | 4{438,747,10} | CCOC(=O)C1=COC(=N1)C1=C(NC2CCOC2)N2C(C=CC(Br)=C2CC)=N1  c:8,11,22,25,29,t:5                                | Z8855619574 | 1{438} | CCc1nc(N)ccc1Br              | 2{747} | CCOC(=O)c1coc(C=O)n1                | 3{10} | [C-]#[N+]C1CCOC1            | 39.0 | 32 |
| 1627 | 4{46,19,9}    | CNC1=C(N=C2C=CC=CN12)C1=C(OC)C=N N1C  c:6,8,13,17,t:2,4                                                    | Z8873684646 | 1{46}  | Nc1ccccn1                    | 2{19}  | COc1cnn(C)c1C=O                     | 3{9}  | C[N+]#[C-]                  | 22.2 | 32 |
| 1628 | 4{105,480,50} | NC(=O)C1=CC=CC2=NC(=C(NC3=CC4=C(O)CCO4)C=C3)N12)C1=CC2=C(CCO2)N=C1  c:5,21,36,t:3,7,9,12,14,27,29          | Z8829498452 | 1{105} | NC(=O)c1cccc(N)n1            | 2{480} | O=Cc1cnc2COCc2c1                    | 3{50} | [C-]#[N+]c1cccc2OCCO2c1     | 38.1 | 32 |
| 1629 | 4{171,318,15} | CCNC1=C(N=C2C=C(C=CN12)N1C=CN=C1)C1CC1CC1(F)F  c:7,9,15,17,t:3,5                                           | Z8878918910 | 1{171} | Nc1cc(ccn1)n2ccnc2           | 2{318} | FC1(F)CC21CC2C=O                    | 3{15} | CC[N+]#[C-]                 | 28.3 | 32 |
| 1630 | 4{353,748,32} | CN1N=C(C=C1)C1=C(NC2CCCC2)N2C=C(NS(C)(=O)=O)C=CC2=N1)C(F)(F)F  c:2,4,7,23,26,t:16                          | Z8873685348 | 1{353} | Cl.CS(=O)(=O)Nc1ccc(N)nc1    | 2{748} | Cn1nc(cc1C=O)C(F)(F)F               | 3{32} | [C-]#[N+]C1CC1              | 36.5 | 32 |
| 1631 | 4{92,749,14}  | COCCNC1=C(N=C2C=C(C=CN12)C(N)=O)[C@H]1C[C@H]1C1=CC=CC=C1  &1:17,19,r,c:9,11,25,27,t:5,7,23                 | Z8854581153 | 1{92}  | NC(=O)c1ccnc(N)c1            | 2{749} | O=C[C@@H]1C[C@H]1c2ccccc2  &1:2,4,r | 3{14} | COCC[N+]#[C-]               | 29.8 | 32 |
| 1632 | 4{83,203,26}  | CP(C)(=O)C1=CN2C(C=C1)=NC(C1=NN(CC(F)F)C=C1)=C2NCC1=CC=C(F)C=C1  c:8,10,20,22,32,t:4,13,27,29              | Z8846491831 | 1{83}  | CP(=O)(C)c1ccc(N)nc1         | 2{203} | FC(F)Cn1ccc(C=O)n1                  | 3{26} | Fc1ccc(C[N+]#[C-])cc1       | 37.8 | 31 |

|      |               |                                                                                                  |             |        |                           |        |                                                 |       |                        |      |    |
|------|---------------|--------------------------------------------------------------------------------------------------|-------------|--------|---------------------------|--------|-------------------------------------------------|-------|------------------------|------|----|
| 1633 | 4{187,662,12} | CP(C)(=O)C1=CC(=CC=C1)C1=C(NCC2CCOC2)N2C=C(Cl)C(=CC2=N1)C#N  c:6,8,11,25,28,t:4,22               | Z8873684757 | 1{187} | Nc1cc(C#N)c(Cl)cn1        | 2{662} | CP(=O)(C)c1cccc(C=O)c1                          | 3{12} | [C-]#[N+]CC1COC1       | 36.1 | 31 |
| 1634 | 4{377,665,46} | CN1N=NC(=C1C)C1=C(NCC(C)=C)N2C=CC=C(OCC(F)F)C2=N1  c:2,4,8,16,26,t:18                            | Z8878918373 | 1{377} | Nc1ncccc1OCC(F)F          | 2{665} | Cc1c(C=O)nn1C                                   | 3{46} | CC(=C)C[N+]#[C-]       | 30.5 | 31 |
| 1635 | 4{84,645,31}  | CSCCNC1=C(N=C2N1C=CN=C2C(C)C)C1=CN=N1  c:7,11,13,22,t:5,19                                       | Z8873684861 | 1{84}  | CC(C)c1nccnc1N            | 2{645} | O=Cc1c[nH]nn1                                   | 3{31} | CSCC[N+]#[C-]          | 26.7 | 31 |
| 1636 | 4{41,262,9}   | CCC1=NN(C)C(=C1Cl)C1=C(NC)N2C=C(C)N=CC2=N1  c:6,10,18,21,t:2,15                                  | Z8878918869 | 1{41}  | Cc1cnc(N)cn1              | 2{262} | CCc1nn(C)c(C=O)c1Cl                             | 3{9}  | C[N+]#[C-]             | 25.5 | 31 |
| 1637 | 4{92,101,7}   | NC(=O)C1=CC2=NC(=C(NC3CCOCC3)N2C=C1)C1=C(CO)C=CS1  c:19,22,26,t:3,5,7                            | Z8829498636 | 1{92}  | NC(=O)c1cnc(N)c1          | 2{101} | OCc1ccsc1C=O                                    | 3{7}  | [C-]#[N+]C1CCOCC1      | 31.2 | 31 |
| 1638 | 4{73,750,13}  | CCOC1=CC(=CC=C1)C1=C(NCC2=CC=C(O)C)C=C2)N2N3C=CN=C3C=CC2=N1  c:5,7,10,20,25,27,30,33,t:3,14,16   | Z8878918873 | 1{73}  | Nc1ccc2nccn2n1            | 2{750} | CCOc1cccc(C=O)c1                                | 3{13} | COc1ccc(C[N+]#[C-])cc1 | 34.6 | 31 |
| 1639 | 4{467,751,47} | COC1=CC2=C(C=C1)C=C(CO2)C1=C(NC(C)C)N2C=C(C=CC2=N1)C(=O)N1CCOCC1  c:4,6,9,14,21,23,26,t:2        | Z8873685299 | 1{467} | Nc1ccc(en1)C(=O)N2C COCC2 | 2{751} | COc1ccc2C=C(COc2c1)C=O                          | 3{47} | CC(C)[N+]#[C-]         | 37.4 | 31 |
| 1640 | 4{352,752,49} | CN1CCN(CC1=O)C1=CN2C(C=C1)=NC(=C2)NC1CC(F)(F)C1)C1=CC(=CC=C1)C#N  c:13,15,17,30,32,t:9,28        | Z8873684814 | 1{352} | CN1CCN(C)C1=O)c2ccc(N)nc2 | 2{752} | O=Cc1cccc(C#N)c1                                | 3{49} | FC1(F)CC(C1)[N+]#[C-]  | 36.3 | 31 |
| 1641 | 4{69,753,10}  | CNC(=O)C1=CC2=NC([C@@H]3CCCC[C@H](C)N3C(=O)OC(C)(C)C)=C(NC3CCOC3)N2C=C1  &1:9,13,r;c:34,t:4,6,23 | Z8878918622 | 1{69}  | CNC(=O)c1cnc(N)c1         | 2{753} | C[C@@H]1CCC[C@H](C=O)N1C(=O)OC(C)(C)C  &1:1,5,r | 3{10} | [C-]#[N+]C1CCOC1       | 38.0 | 31 |
| 1642 | 4{28,115,7}   | COC1=NN(C)C(=C1)C1=C(NC2CCOCC2)N2C=CC(=CC2=N1)C1=NOC=N1  c:6,9,20,22,25,31,t:2,28                | Z8855739208 | 1{28}  | Cl.Nc1cc(ccn1)c2ncon2     | 2{115} | COc1cc(C=O)n(C)n1                               | 3{7}  | [C-]#[N+]C1CCOCC1      | 32.8 | 31 |
| 1643 | 4{83,754,18}  | CC(C)(C)NC1=C(N=C2C=CC(=CN12)P(C)(C)=O)C1CC2CC2C1  c:9,11,t:5,7                                  | Z8878918486 | 1{83}  | CP(=O)(C)c1ccc(N)nc1      | 2{754} | O=CC1CC2CC2C1                                   | 3{18} | CC(C)(C)[N+]#[C-]      | 28.7 | 31 |
| 1644 | 4{183,392,28} | CCCNC1=C(N=C2N1C(C)=CC=C2OC)C1CCOCC1  c:6,11,13,t:4                                              | Z8849597822 | 1{183} | COc1ccc(C)nc1N            | 2{392} | O=CC1CCOCC1                                     | 3{28} | CCC[N+]#[C-]           | 25.2 | 31 |

|      |               |                                                                                                      |             |        |                                  |        |                                           |       |                           |      |    |
|------|---------------|------------------------------------------------------------------------------------------------------|-------------|--------|----------------------------------|--------|-------------------------------------------|-------|---------------------------|------|----|
| 1645 | 4{350,354,5}  | COCCNC1=C(N=C2C=NC(=CN12)C1=CC=CC=C1)C1=C(C=CC=C1)P(C)(C)=O<br> c:10,12,19,21,26,28,t:6,8,17,24      | Z8878918587 | 1{350} | Nc1cnc(en1)<br>c2ccccc2          | 2{354} | CP(=O)(C)c1<br>ccccc1C=O                  | 3{5}  | COCCC[N+]<br>#[C-]        | 36.1 | 31 |
| 1646 | 4{154,468,47} | CSC(C)CC1=C(NC(C)C)N2C=CC(=CC2=N1)[N+][O-]=O  c:5,12,14,17                                           | Z8854581155 | 1{154} | Nc1cc(ccn1)<br>[N+](=O)[O-]      | 2{468} | CSC(C)CC=O                                | 3{47} | CC(C)[N+]#[C-]            | 25.6 | 31 |
| 1647 | 4{85,755,15}  | CCNC1=C(N=C2C=C(C=C(C)N12)C#N)C1=C2=C(C=C1)N(C)C(=O)O2<br> c:7,19,21,t:3,5,9,17                      | Z8849597804 | 1{85}  | Cc1cc(C#N)<br>cc(N)n1            | 2{755} | Cn1c(=O)oc2<br>cc(C=O)ccc1<br>2           | 3{15} | CC[N+]#[C-]               | 28.8 | 31 |
| 1648 | 4{79,137,13}  | COC1=CC=C(CNC2=C(N=C3C=NC=C(C)N23)C2=C(C)ON=C2C)C=C1<br> c:12,20,24,28,t:2,4,8,10,14                 | Z8854581163 | 1{79}  | Cc1cncc(N)<br>n1                 | 2{137} | Cc1noc(C)c1<br>C=O                        | 3{13} | COc1ccc(C[N+]#[C-])cc1    | 30.0 | 31 |
| 1649 | 4{72,536,46}  | COC1=NC(Br)=CN2C(NCC(C)=C)=C(N=C12)C1=CN=C(O1)C1CCOCC1<br> c:5,13,21,t:2,15,19                       | Z8835022870 | 1{72}  | COc1nc(Br)<br>cnc1N              | 2{536} | O=Cc1cnc(o1)<br>C2CCOCC<br>2              | 3{46} | CC(=C)C[N+]#[C-]          | 36.9 | 30 |
| 1650 | 4{186,756,69} | COC1=C(NC2=C(N=C3C=C(C=CN23)S(=O)(=O)N(C)C)C2=CC(=CO2)S(C)(=O)=O)C=CC=C1  c:2,9,11,24,32,34,t:5,7,22 | Z8878918381 | 1{186} | Cl.CN(C)S(=O)(=O)c1c<br>cnc(N)c1 | 2{756} | CS(=O)(=O)<br>c1coc(C=O)c<br>1            | 3{69} | COc1ccccc1[N+]#[C-]       | 40.3 | 30 |
| 1651 | 4{41,757,13}  | CCCN1N=CN=C1C1=C(NCC2=CC=C(OC)C=C2)N2C=C(C)N=CC2=N1<br> c:4,6,9,19,26,29,t:13,15,23                  | Z8878918313 | 1{41}  | Cc1cnc(N)c<br>n1                 | 2{757} | CCCN1ncnc1<br>C=O                         | 3{13} | COc1ccc(C[N+]#[C-])cc1    | 31.0 | 30 |
| 1652 | 4{109,539,34} | NS(=O)(=O)C1=CC=CC2=NC([C@@H]3CCCC[C@H]3C(F)(F)F)=C(NCC3CCCO3)N12<br> &1:11,16,r,c:6,t:4,8,21        | Z8835022889 | 1{109} | Cl.Nc1cccc(n1)<br>S(=O)(=O)N     | 2{539} | FC(F)(F)[C@@H]1CCCC[C@H]1C=O<br> &1:4,9,r | 3{34} | [C-]<br>#[N+]CC1C<br>CCO1 | 36.6 | 30 |
| 1653 | 4{68,354,59}  | CP(C)(=O)C1=C(C=CC=C1)C1=C(NCCC2=C(C(F)=CC=C2)N2C=CC(=CC2=N1)C#C<br> c:6,8,11,19,21,25,27,30,t:4,16  | Z8873684914 | 1{68}  | Nc1cc(C#C)<br>ccn1               | 2{354} | CP(=O)(C)c1<br>ccccc1C=O                  | 3{59} | Fc1cccc(CC[N+]#[C-])c1    | 35.3 | 30 |
| 1654 | 4{46,396,9}   | CNC1=C(N=C2C=CC=CN12)C1=CN=C2COCN12  c:6,8,t:2,4,13,15                                               | Z8849597823 | 1{46}  | Nc1ccccn1                        | 2{396} | O=Cc1cnc2C<br>OCCn12                      | 3{9}  | C[N+]#[C-]                | 22.1 | 30 |
| 1655 | 4{377,413,10} | FC(F)COC1=CC=CN2C(NC3CCOC3)=C(N=C12)C1=CN=C(S1)C1=CC=NC=C1<br> c:7,17,25,31,33,t:5,19,23,29          | Z8873684699 | 1{377} | Nc1cccc1<br>OCC(F)F              | 2{413} | O=Cc1cnc(s1)<br>c2ccccc2                  | 3{10} | [C-]<br>#[N+]C1CC<br>OC1  | 36.2 | 30 |
| 1656 | 4{353,626,35} | CSCCCNC1=C(N=C2C=CC(NS(C)(=O)=O)=CN12)C1=CC2=C(CCN(C2)C(C)=O)S1<br> c:10,17,t:6,8,22,24              | Z8873685326 | 1{353} | Cl.CS(=O)(=O)<br>Nc1ccc(N)nc1    | 2{626} | CC(=O)N1C<br>Cc2sc(C=O)c<br>c2C1          | 3{35} | CSCCC[N+]#[C-]            | 40.1 | 30 |



|      |               |                                                                                                        |             |        |                            |        |                                       |       |                                      |      |    |
|------|---------------|--------------------------------------------------------------------------------------------------------|-------------|--------|----------------------------|--------|---------------------------------------|-------|--------------------------------------|------|----|
| 1657 | 4{83,595,7}   | CN1C=C2C=C(C=CC2=N1)C1=C(NC2CCOC2)N2C=C(C=CC2=N1)P(C)(C)=O<br> c:4,6,9,12,23,25,28,t:2                 | Z8849597826 | 1{83}  | CP(=O)(C)c1ccc(N)nc1       | 2{595} | Cn1cc2cc(C=O)ccc2n1                   | 3{7}  | [C-]<br>#[N+]C1CC<br>OCC1            | 34.4 | 30 |
| 1658 | 4{433,50,18}  | CC1=C(C=CC2=NC([C@@H]3C[C@H]3C3OCCO3)=C(NC(C)(C)C)N12)C#C<br> &1:8,10,r,c:3,t:1,5,17                   | Z8873684729 | 1{433} | Cc1nc(N)ccc1C#C            | 2{50}  | O=C[C@@H]1C[C@H]1C2OCCO2<br> &1:2,4,r | 3{18} | CC(C)(C)[N+]<br>#[C-]                | 27.5 | 30 |
| 1659 | 4{32,758,26}  | CP(C)(=O)C1=CC2=NC(=C(NCC3=CC=C(F)C=C3)N2C=C1)C1=C(F)C=C(C=C1)C(F)F<br> c:17,22,25,28,30,t:4,6,8,12,14 | Z8873685331 | 1{32}  | CP(=O)(C)c1ccnc(N)c1       | 2{758} | FC(F)c1ccc(C=O)c(F)c1                 | 3{26} | Fc1ccc(C[N+]<br>#[C-])cc1            | 37.4 | 30 |
| 1660 | 4{68,673,23}  | COC(=O)CCC(NC1=C(N=C2C=C(C=CN12)C#C)C1=NC=CC(C1)=C1)C(=O)OC<br> c:12,14,23,26,t:8,10,21                | Z8878918805 | 1{68}  | Nc1cc(C#C)ccn1             | 2{673} | Clc1ccnc(C=O)c1                       | 3{23} | COC(=O)CC<br>C([N+]<br>#[C-])C(=O)OC | 34.4 | 30 |
| 1661 | 4{171,408,15} | CCNC1=C(CCN2CCOC2=O)N=C2C=C(C=C N12)N1C=CN=C1  c:3,16,18,24,26,t:14                                    | Z8846491754 | 1{171} | Nc1cc(ccn1)n2ccnc2         | 2{408} | O=CCCN1C<br>COC1=O                    | 3{15} | CC[N+]<br>#[C-]                      | 27.4 | 30 |
| 1662 | 4{428,665,24} | COC1=CC(CNC2=C(N=C3C=NC(Br)=CN23)C2=C(C)N(C)N=N2)=CC=C1<br> c:11,14,19,24,26,28,t:2,7,9                | Z8855739182 | 1{428} | Nc1cnc(Br)cn1              | 2{665} | Cc1c(C=O)nn1C                         | 3{24} | COc1cccc(C<br>[N+]<br>#[C-])c1       | 34.5 | 30 |
| 1663 | 4{234,519,10} | FC(F)C1=NC=C(S1)C1=C(NC2CCOC2)N2C=CN=C(OC3CCC3)C2=N1  c:5,9,19,30,t:3,21                               | Z8878918457 | 1{234} | Nc1ncnc1OC2CCC2            | 2{519} | FC(F)c1ncc(C=O)s1                     | 3{10} | [C-]<br>#[N+]C1CC<br>OC1             | 32.7 | 30 |
| 1664 | 4{54,216,53}  | COC(=O)C1=NC=C(S1)C1=C(NCCOCC2=CC=CC=C2)N2C=C(C=CC2=N1)C(=O)N(C)C<br> c:6,10,19,21,25,27,30,t:4,17     | Z8878918850 | 1{54}  | Cl.CN(C)C(=O)c1ccc(N)nc1   | 2{216} | COC(=O)c1ncc(C=O)s1                   | 3{53} | [C-]<br>#[N+]CCOC<br>c1cccc1         | 38.5 | 30 |
| 1665 | 4{83,759,18}  | COCC1=CC=C(S1)C1=C(NC(C)(C)C)N2C=C(C=CC2=N1)P(C)(C)=O  c:5,9,17,19,22,t:3                              | Z8846492332 | 1{83}  | CP(=O)(C)c1ccc(N)nc1       | 2{759} | COCC1ccc(C=O)s1                       | 3{18} | CC(C)(C)[N+]<br>#[C-]                | 31.2 | 30 |
| 1666 | 4{197,407,67} | CCC(C)NC1=C(N=C2C=CC(=CN12)S(=O)(=O)CC(C)C)C1=NN=C(CC)N1<br> c:9,11,t:5,7,23,25                        | Z8873685459 | 1{197} | CC(C)CS(=O)(=O)c1ccc(N)nc1 | 2{407} | CCc1nnc(C=O)[nH]1                     | 3{67} | CCC(C)[N+]<br>#[C-]                  | 32.1 | 29 |
| 1667 | 4{65,35,23}   | CCC1=CN=CC2=NC(=C(NC(CCC(=O)OC)C(=O)OC)N12)C1=NN(C)C(C)=C1C1<br> c:4,30,t:2,6,8,25                     | Z8878918830 | 1{65}  | CCc1cnc(N)nc1              | 2{35}  | Cc1c(Cl)c(C=O)nn1C                    | 3{23} | COC(=O)CC<br>C([N+]<br>#[C-])C(=O)OC | 35.6 | 29 |
| 1668 | 4{76,294,23}  | COC(=O)CCC(NC1=C(N=C2C=CC(C)=C(C1)N12)C1=C(OC)C(=O)C=CO1)C(=O)OC<br> c:12,21,27,t:8,10,15              | Z8878918563 | 1{76}  | Cc1ccc(N)nc1Cl             | 2{294} | COc1c(C=O)occc1=O                     | 3{23} | COC(=O)CC<br>C([N+]<br>#[C-])C(=O)OC | 36.7 | 29 |

|      |               |                                                                                                              |             |        |                             |        |                                    |       |                               |      |    |
|------|---------------|--------------------------------------------------------------------------------------------------------------|-------------|--------|-----------------------------|--------|------------------------------------|-------|-------------------------------|------|----|
| 1669 | 4{83,760,31}  | CSCCNC1=C(N=C2C=CC(=CN12)P(C)(C)=O)C1=CC(F)=C(C=C1)C1CC1<br> c:9,11,23,25,t:5,7,20                           | Z8873685439 | 1{83}  | CP(=O)(C)c1ccc(N)nc1        | 2{760} | Fc1cc(C=O)ccc1C2CC2                | 3{31} | CSCC[N+]#[C-]                 | 32.9 | 29 |
| 1670 | 4{186,386,23} | COC(=O)CCC(NC1=C(N=C2C=C(C=CN12)S(=O)(=O)N(C)C)[C@H]1CC1(C)C)C(=O)OC<br> c:12,14,t:8,10                      | Z8873685446 | 1{186} | Cl.CN(C)S(=O)(=O)c1cnc(N)c1 | 2{386} | CC1(C)C[C@@H]1C=O                  | 3{23} | COC(=O)CC(C([N+]#[C-])C(=O)OC | 36.5 | 29 |
| 1671 | 4{32,761,7}   | CP(C)(=O)C1=CC2=NC(=C(NC3CCOCC3)N2C=C1)C1=C(C1)C=C(C=C1)C#C<br> c:20,23,26,28,t:4,6,8                        | Z8873684640 | 1{32}  | CP(=O)(C)c1ccnc(N)c1        | 2{761} | Clc1cc(C#C)ccc1C=O                 | 3{7}  | [C-]#[N+]C1CCOCC1             | 33.3 | 29 |
| 1672 | 4{83,760,18}  | CC(C)(C)NC1=C(N=C2C=CC(=CN12)P(C)(C)=O)C1=CC(F)=C(C=C1)C1CC1<br> c:9,11,23,25,t:5,7,20                       | Z8878918433 | 1{83}  | CP(=O)(C)c1ccc(N)nc1        | 2{760} | Fc1cc(C=O)ccc1C2CC2                | 3{18} | CC(C)(C)[N+]#[C-]             | 31.1 | 29 |
| 1673 | 4{431,762,10} | FC1=CN2C(C=C1)=NC(C1CC1(F)F)=C2NC1CCOC1<br> c:5,7,15,t:1                                                     | Z8849597836 | 1{431} | Nc1ccc(F)cn1                | 2{762} | FC1(F)CC1C=O                       | 3{10} | [C-]#[N+]C1CCOC1              | 23.1 | 29 |
| 1674 | 4{28,373,18}  | C[C@@H]1[C@@H](C2=C(NC(C)(C)C)N3C=CC(=CC3=N2)C2=NOC=N2)C1(F)F<br> &1:1,2,r,c:3,11,13,16,22,t:19              | Z8846492415 | 1{28}  | Cl.Nc1cc(ccn1)c2ncon2       | 2{373} | C[C@@H]1[C@@H](C=O)C1(F)F &1:1,2,r | 3{18} | CC(C)(C)[N+]#[C-]             | 26.9 | 29 |
| 1675 | 4{54,763,37}  | COC(=O)C1CC(C1)NC1=C(N=C2C=CC(=CN12)C(=O)N(C)C)C1=NNC2=C1C=C(C=C2)C(=O)OC<br> c:14,16,29,32,34,t:10,12,26    | Z8873684933 | 1{54}  | Cl.CN(C)C(=O)c1ccc(N)nc1    | 2{763} | COC(=O)c1cc2[nH]nc(C=O)c2c1        | 3{37} | COC(=O)C1CC(C1)[N+]#[C-]      | 38.0 | 29 |
| 1676 | 4{73,764,20}  | COC1=CC(C)=C(NC2=C(N=C3C=CC4=NC=CN4N23)C2=C(OC)C(C1)=CC=C2)C=C1<br> c:12,16,23,28,30,33,t:2,5,8,10,14        | Z8878918364 | 1{73}  | Nc1ccc2nccn2n1              | 2{764} | COc1c(Cl)ccc1C=O                   | 3{20} | COc1ccc([N+]#[C-])c(C)c1      | 33.4 | 29 |
| 1677 | 4{113,447,14} | COCCNC1=C(N=C2N1C=CC=C2N1CCOCC1)C1=CC=C(C=C1)C#CC(C)(C)O<br> c:7,11,13,25,27,t:5,23                          | Z8878918558 | 1{113} | Nc1ncccc1N2CCOCC2           | 2{447} | CC(C)(O)C#Cc1ccc(C=O)cc1           | 3{14} | COCC[N+]#[C-]                 | 33.3 | 28 |
| 1678 | 4{81,274,13}  | COC1=CC=C(CNC2=C(CC3(CCOCC3)C#N)N=C3C=NC=CN23)C=C1<br> c:8,22,24,29,t:2,4,20                                 | Z8878918599 | 1{81}  | Nc1cncn1                    | 2{274} | O=CCC1(CCOC1)C#N                   | 3{13} | COc1ccc(C[N+]#[C-])cc1        | 28.9 | 28 |
| 1679 | 4{356,746,8}  | COC(=O)C(CC1=CC=CC=C1)NC1=C(N=C2C=CC(C1)=C(N12)C(=O)N(C)C)C1=C(C)C=CN=C1<br> c:8,10,18,21,31,34,36,t:6,14,16 | Z8878918444 | 1{356} | CN(C)C(=O)c1nc(N)ccc1Cl     | 2{746} | Cc1cncnc1C=O                       | 3{8}  | COC(=O)C(Cc1cccc1)[N+]#[C-]   | 37.7 | 28 |

|      |               |                                                                                                                  |             |        |                                     |        |                                   |       |                                  |      |    |
|------|---------------|------------------------------------------------------------------------------------------------------------------|-------------|--------|-------------------------------------|--------|-----------------------------------|-------|----------------------------------|------|----|
| 1680 | 4{77,725,5}   | CCN1N=NC=C1C1=C(NCCCOC)N2C=C(C=CC2=N1)C1=CN=CC=C1<br> c:3,5,8,17,19,22,27,29,t:25                                | Z8878918529 | 1{77}  | Nc1ccc(en1)<br>c2cccnc2             | 2{725} | CCn1nnc1C<br>=O                   | 3{5}  | COCCC[N+]<br>#[C-]               | 28.8 | 28 |
| 1681 | 4{54,575,32}  | CN(C)C(=O)C1=CN2C(C=C1)=NC(CC(NC(=O)OC(C)(C)C)C(F)(F)F)=C2NC1CCC1<br> c:9,11,27,t:5                              | Z8873685300 | 1{54}  | Cl.CN(C)C(=O)c1ccc(N)<br>nc1        | 2{575} | CC(C)(C)OC(=O)NC(CC(=O)C(F)(F)F   | 3{32} | [C-]<br>#[N+]C1CC<br>C1          | 35.8 | 28 |
| 1682 | 4{199,563,34} | CC(=O)NC1=NC=C(C=C1)C1=C(NCCC2CCC<br>O2)N2C=CC=C(C2=N1)C(C)(F)F<br> c:6,8,11,22,24,27,t:4                        | Z8878918377 | 1{199} | CC(F)(F)c1<br>ccnc1N                | 2{563} | CC(=O)Nc1c<br>cc(C=O)en1          | 3{34} | [C-]<br>#[N+]CC1C<br>CCO1        | 31.6 | 28 |
| 1683 | 4{81,420,13}  | COC1=CC=C(CNC2=C(CC(C)(C)C#N)N=C3<br>C=NC=CN23)C=C1  c:8,18,20,25,t:2,4,16                                       | Z8878918554 | 1{81}  | Nc1cncn1                            | 2{420} | CC(C)(CC=<br>O)C#N                | 3{13} | COc1ccc(C[<br>N+]#[C-])cc1       | 25.3 | 28 |
| 1684 | 4{79,396,13}  | COC1=CC=C(CNC2=C(N=C3C=NC=C(C)N2<br>3)C2=CN=C3COCCN23)C=C1<br> c:12,31,t:2,4,8,10,14,20,22                       | Z8878918546 | 1{79}  | Cc1cnc(N)<br>n1                     | 2{396} | O=Cc1cnc2C<br>OCCn12              | 3{13} | COc1ccc(C[<br>N+]#[C-])cc1       | 29.4 | 28 |
| 1685 | 4{105,654,66} | CC(NC1=C(CCC2=CN=CO2)N=C2C=CC=C(<br>N12)C(N)=O)C1=CC=CC=C1<br> c:3,9,15,17,27,29,t:7,13,25                       | Z8878918902 | 1{105} | NC(=O)c1c<br>ccc(N)n1               | 2{654} | O=CCCc1cn<br>co1                  | 3{66} | CC([N+]#[C-]<br>)c1cccc1         | 28.1 | 28 |
| 1686 | 4{154,552,49} | [O-]<br>][N+](=O)C1=CC2=NC(=C(NC3CC(F)(F)C3)<br>N2C=C1)C1=CN=C(C=C1)C#C<br> c:19,24,26,t:3,5,7,22                | Z8873685272 | 1{154} | Nc1cc(en1)<br>)[N+](=O)[<br>O-]     | 2{552} | O=Cc1ccc(C<br>#C)nc1              | 3{49} | FC1(F)CC(C<br>1)[N+]#[C-]        | 27.7 | 28 |
| 1687 | 4{50,744,7}   | CP(C)(=O)C1=CC=CC2=NC(=C(NC3CCOCC<br>3)N12)C1=C(F)C=CC(=C1)C#C<br> c:6,23,26,28,t:4,8,10                         | Z8846492306 | 1{50}  | CP(=O)(C)c<br>1cccc(N)n1            | 2{744} | Fe1ccc(C#C)<br>cc1C=O             | 3{7}  | [C-]<br>#[N+]C1CC<br>OCC1        | 30.8 | 28 |
| 1688 | 4{468,756,69} | COC1=C(NC2=C(N=C3C=CC=C(N23)C2=CN<br>(C)N=C2)C2=CC(=CO2)S(C)(=O)=O)C=CC=<br>C1  c:2,9,11,20,25,33,35,t:5,7,16,23 | Z8878918317 | 1{468} | Cl.Cl.Cn1cc<br>(en1)c2cccc<br>(N)n2 | 2{756} | CS(=O)(=O)<br>c1coc(C=O)c<br>1    | 3{69} | COc1cccc1[<br>N+]#[C-]           | 34.5 | 28 |
| 1689 | 4{48,765,22}  | CS(=O)(=O)C1=CC2=NC(=C(NC3COC3)N2C<br>=C1)C1=CN=C(OC2=CC=C(F)C=C2)C=C1<br> c:18,31,34,t:4,6,8,21,23,26,28        | Z8873684798 | 1{48}  | CS(=O)(=O)<br>c1ccnc(N)c<br>1       | 2{765} | Fe1ccc(Oc2c<br>cc(C=O)cn2)<br>cc1 | 3{22} | [C-]<br>#[N+]C1CO<br>C1          | 33.7 | 27 |
| 1690 | 4{95,61,37}   | COC(=O)C1CC(C1)NC1=C(N=C2C=CC(=CN<br>12)C(F)F)C1=CC=C(C=C1)S(C)=O<br> c:14,16,26,28,t:10,12,24                   | Z8849597796 | 1{95}  | Nc1ccc(en1)<br>C(F)F                | 2{61}  | CS(=O)c1ccc<br>(C=O)cc1           | 3{37} | COC(=O)C1<br>CC(C1)[N+]<br>#[C-] | 32.2 | 27 |

|      |               |                                                                                                                 |             |        |                                |        |                                    |       |                                   |      |    |
|------|---------------|-----------------------------------------------------------------------------------------------------------------|-------------|--------|--------------------------------|--------|------------------------------------|-------|-----------------------------------|------|----|
| 1691 | 4{73,88,13}   | COC1=CC=C(CNC2=C(N=C3C=CC4=NC=C<br>N4N23)C2=CC3=C(C=CC=N3)C=C2)C=C1<br> c:12,16,27,29,32,35,t:2,4,8,10,14,23,25 | Z8829498653 | 1{73}  | Nc1ccc2ncc<br>n2n1             | 2{88}  | O=Cc1ccc2c<br>ccnc2c1              | 3{13} | COc1ccc(C[<br>N+]#[C-])cc1        | 31.2 | 27 |
| 1692 | 4{142,766,46} | CC1CC1C1=C(NCC(C)=C)N2C=CC=C(OCCS<br>(C)(=O)=O)C2=N1  c:5,13,25,t:15                                            | Z8873684943 | 1{142} | CS(=O)(=O<br>)CCOc1ccc<br>nc1N | 2{766} | CC1CC1C=<br>O                      | 3{46} | CC(=C)C[N+<br>]#[C-]              | 27.0 | 27 |
| 1693 | 4{103,354,5}  | COCCCN1=C(N=C2C=NC=C(CO)N12)C1=<br>C(C=CC=C1)P(C)(C)=O<br> c:10,21,23,t:6,8,12,19                               | Z8873685481 | 1{103} | Nc1cncc(C<br>O)n1              | 2{354} | CP(=O)(C)c1<br>ccccc1C=O           | 3{5}  | COCCC[N+]<br>#[C-]                | 28.8 | 27 |
| 1694 | 4{464,438,5}  | COCCCN1=C(N=C2C=CC(=CN12)N1CCN(<br>C)CC1)C1=NC(C)=NC(=C1)C(F)F<br> c:10,12,28,30,t:6,8,25                       | Z8878918570 | 1{464} | CN1CCN(C<br>C1)c2ccc(N<br>)nc2 | 2{438} | Cc1nc(C=O)<br>cc(n1)C(F)F          | 3{5}  | COCCC[N+]<br>#[C-]                | 32.9 | 27 |
| 1695 | 4{46,257,9}   | CNC1=C(N=C2C=CC=CN12)C1CC(C1)NC(=<br>O)OC(C)(C)C  c:6,8,t:2,4                                                   | Z8878918515 | 1{46}  | Nc1ccccn1                      | 2{257} | CC(C)(C)OC<br>(=O)NC1CC(<br>C1)C=O | 3{9}  | C[N+]#[C-]                        | 23.3 | 27 |
| 1696 | 4{123,149,15} | CCNC1=C(N=C2C=C(OCCO)C=CN12)C1=C(<br>OC)C(OC)=CC(Br)=C1  c:13,18,24,27,t:3,5,7                                  | Z8878918634 | 1{123} | Cl.Nc1cc(O<br>CCO)ccn1         | 2{149} | COc1cc(Br)c<br>c(C=O)c1OC          | 3{15} | CC[N+]#[C-]                       | 32.0 | 27 |
| 1697 | 4{81,46,9}    | CNC1=C(CCCCO)N=C2C=NC=CN12<br> c:2,13,15,t:11                                                                   | Z8873684589 | 1{81}  | Nc1cnccn1                      | 2{46}  | COCCCCC<br>=O                      | 3{9}  | C[N+]#[C-]                        | 18.2 | 27 |
| 1698 | 4{434,92,31}  | CSCCN1=C(N=C2C=CC(=CN12)C(C)(F)F<br>C1=CC(C)=NO1  c:9,11,23,t:5,7,20                                            | Z8878918864 | 1{434} | CC(F)(F)c1<br>ccc(N)nc1        | 2{92}  | Cc1cc(C=O)<br>on1                  | 3{31} | CSCCN[+]#<br>[C-]                 | 25.8 | 27 |
| 1699 | 4{81,25,13}   | COC1=CC=C(CNC2=C(N=C3C=NC=CN23)C<br>2=CN=C(N=C2)C2CCOCC2)C=C1<br> c:12,14,21,23,33,t:2,4,8,10,19                | Z8878918423 | 1{81}  | Nc1cnccn1                      | 2{25}  | O=Cc1enc(n<br>c1)C2CCOC<br>C2      | 3{13} | COc1ccc(C[<br>N+]#[C-])cc1        | 30.4 | 27 |
| 1700 | 4{386,725,5}  | CCN1N=NC=C1C1=C(NCCCOC)N2C=CC(C)<br>=CC2=N1  c:3,5,8,17,20,23                                                   | Z8873684786 | 1{386} | Cc1cncc(N)<br>c1               | 2{725} | CCn1ncc1C<br>=O                    | 3{5}  | COCCC[N+]<br>#[C-]                | 22.8 | 27 |
| 1701 | 4{99,767,73}  | CCCC(OC)C1=C(NC2=C(OC)C=C(OC)C=C2)<br>N2C=C(C=CC2=N1)S(N)(=O)=O<br> c:6,9,17,21,23,26,t:13                      | Z8855619704 | 1{99}  | Nc1ccc(en1<br>)S(=O)(=O)<br>N  | 2{767} | CCCC(OC)C<br>=O                    | 3{73} | COc1ccc([N<br>+]#[C-<br>])c(OC)c1 | 31.6 | 27 |
| 1702 | 4{103,768,5}  | COCCCN1=C(N=C2C=NC=C(CO)N12)C1=<br>C(F)C(Br)=C(F)C=C1  c:10,19,26,t:6,8,12,23                                   | Z8873685426 | 1{103} | Nc1cncc(C<br>O)n1              | 2{768} | Fc1ccc(C=O)<br>c(F)c1Br            | 3{5}  | COCCC[N+]<br>#[C-]                | 30.9 | 27 |
| 1703 | 4{91,125,26}  | COC1=NC=NC(=C1)C1=C(NCC2=CC=C(F)C<br>=C2)N2C=C(C=CC2=N1)C(N)=O<br> c:4,6,9,18,22,24,27,t:2,13,15                | Z8878918391 | 1{91}  | NC(=O)c1c<br>cc(N)nc1          | 2{125} | COc1cc(C=O<br>)ncn1                | 3{26} | Fc1ccc(C[N+]<br>#[C-])cc1         | 28.3 | 27 |

|      |               |                                                                                                                |             |        |                                      |        |                                       |       |                                               |      |    |
|------|---------------|----------------------------------------------------------------------------------------------------------------|-------------|--------|--------------------------------------|--------|---------------------------------------|-------|-----------------------------------------------|------|----|
| 1704 | 4{124,769,43} | CN1N=CN=C1C1=C(NC2CCN(CC2)C(=O)O<br>C(C)(C)C)N2C=CC=C(CO)C2=N1<br> c:2,4,7,25,32,t:27                          | Z8878918536 | 1{124} | Ne1ncccc1<br>CO                      | 2{769} | Cn1ncnc1C=<br>O                       | 3{43} | CC(C)(C)OC<br>(=O)N1CCCC<br>(CC1)[N+]#<br>C-] | 30.8 | 27 |
| 1705 | 4{78,770,39}  | CCOCCNC1=C(N=C2C=C(C)C3=NC(C)=CN<br>3N12)C1=C(OC)C=CC(Cl)=C1C1<br> c:16,23,27,30,t:6,8,10,13                   | Z8873684775 | 1{78}  | Cc1cn2nc(N<br>)cc(C)c2n1             | 2{770} | COc1ccc(Cl)<br>c(Cl)c1C=O             | 3{39} | CCOCC[N+]<br>#[C-]                            | 32.3 | 27 |
| 1706 | 4{155,450,14} | COCCNC1=C(N=C2N1C=CC=C2Cl)C1=CC(=<br>CC=C1)S(=O)(=O)N(C)C<br> c:7,11,13,19,21,t:5,17                           | Z8873684599 | 1{155} | Ne1ncccc1<br>Cl                      | 2{450} | CN(C)S(=O)<br>(=O)c1cccc(<br>C=O)c1   | 3{14} | COCC[N+]#<br>C-]                              | 29.4 | 27 |
| 1707 | 4{48,216,15}  | CCNC1=C(N=C2C=C(C=CN12)S(C)(=O)=O)<br>C1=CN=C(S1)C(=O)OC  c:7,9,20,t:3,5,18                                    | Z8878918866 | 1{48}  | CS(=O)(=O)<br>)c1ccnc(N)c<br>1       | 2{216} | COC(=O)c1n<br>cc(C=O)s1               | 3{15} | CC[N+]#[C-]                                   | 27.2 | 27 |
| 1708 | 4{175,516,46} | CN1N=C(N=C1C1CC1)C1=C(NCC(C)=C)N2<br>C=CC=C(OCCF)C2=N1  c:2,4,11,19,28,t:21                                    | Z8873684651 | 1{175} | Ne1ncccc1<br>OCCF                    | 2{516} | Cn1nc(C=O)<br>nc1C2CC2                | 3{46} | CC(=C)C[N+]<br>#[C-]                          | 26.5 | 26 |
| 1709 | 4{32,771,15}  | CCNC1=C(N=C2C=C(C=CN12)P(C)(C)=O)C<br>1=CC=C(C=C1)C(F)(F)Cl  c:7,9,20,22,t:3,5,18                              | Z8846492144 | 1{32}  | CP(=O)(C)c<br>1ccnc(N)c1             | 2{771} | FC(F)(Cl)c1c<br>cc(C=O)cc1            | 3{15} | CC[N+]#[C-]                                   | 28.1 | 26 |
| 1710 | 4{103,772,5}  | COCCNC1=C(N=C2C=NC=C(CO)N12)C1=<br>NC=C(OC(F)(F)C(F)(F)F)C=C1<br> c:10,31,t:6,8,12,19,21                       | Z8873684802 | 1{103} | Ne1cncc(C<br>O)n1                    | 2{772} | FC(F)(F)C(F)<br>(F)Oc1ccc(C<br>=O)nc1 | 3{5}  | COCCC[N+]<br>#[C-]                            | 31.6 | 26 |
| 1711 | 4{123,119,32} | CCOC(=O)C1=NN=C(N1)C1=C(NC2CCC2)N<br>2C=CC(OCCO)=CC2=N1  c:7,11,20,26,29,t:5                                   | Z8855739092 | 1{123} | Cl.Nc1cc(O<br>CCO)ccn1               | 2{119} | CCOC(=O)c<br>1nnc(C=O)[n<br>H]1       | 3{32} | [C-<br>]#[N+]C1CC<br>C1                       | 27.3 | 26 |
| 1712 | 4{28,773,7}   | CC(C)CN1N=C(C)C(=C1Cl)C1=C(NC2CCOC<br>C2)N2C=CC(=CC2=N1)C1=NOC=N1<br> c:8,12,23,25,28,34,t:5,31                | Z8878918880 | 1{28}  | Cl.Nc1cc(cc<br>n1)c2ncon2            | 2{773} | CC(C)Cn1nc<br>(C)c(C=O)c1<br>Cl       | 3{7}  | [C-<br>]#[N+]C1CC<br>OCC1                     | 32.1 | 26 |
| 1713 | 4{91,774,35}  | CSCCCNC1=C(N=C2C=CC(=CN12)C(N)=O)<br>C1=NC(Br)=CS1  c:10,12,23,t:6,8,20                                        | Z8835022912 | 1{91}  | NC(=O)c1c<br>cc(N)nc1                | 2{774} | Br1csc(C=O<br>)n1                     | 3{35} | CSCCC[N+]<br>#[C-]                            | 30.0 | 26 |
| 1714 | 4{46,48,9}    | CNC1=C(N=C2C=CC=CN12)C1=CNC(=N1)C<br>1CCC1  c:6,8,16,t:2,4,13                                                  | Z8878918425 | 1{46}  | Ne1cccn1                             | 2{48}  | O=Cc1c[nH]<br>c(n1)C2CCC<br>2         | 3{9}  | C[N+]#[C-]                                    | 18.8 | 26 |
| 1715 | 4{186,775,66} | COC(=O)C1=NC(C)=C(S1)C1=C(NC(C)C2=C<br>C=CC=C2)N2C=CC(=CC2=N1)S(=O)(=O)N(<br>C)C  c:7,11,18,20,24,26,29,t:4,16 | Z8855739085 | 1{186} | Cl.CN(C)S(<br>=O)(=O)c1c<br>cnc(N)c1 | 2{775} | COC(=O)c1n<br>c(C)c(C=O)s<br>1        | 3{66} | CC([N+]#[C-<br>)c1cccc1                       | 35.0 | 26 |

|      |               |                                                                                                                |             |        |                          |        |                         |       |                                  |      |    |
|------|---------------|----------------------------------------------------------------------------------------------------------------|-------------|--------|--------------------------|--------|-------------------------|-------|----------------------------------|------|----|
| 1716 | 4{28,225,7}   | C1C1=CC2=C(C=NN2)C(=C1)C1=C(NC2CCOCC2)N2C=CC(=CC2=N1)C1=NOC=N1<br> c:5,9,12,23,25,28,34,t:1,3,31               | Z8835022876 | 1{28}  | Cl.Nc1cc(ccn1)c2ncon2    | 2{225} | Clc1cc(C=O)c2cn[nH]c2c1 | 3{7}  | [C-]<br>#[N+]C1CCOCC1            | 30.4 | 26 |
| 1717 | 4{144,776,22} | CNS(=O)(=O)C1=CN2C(C=C1)=NC(=C2NC1COC1)C1=C(F)C=C(C=C1F)C#C<br> c:9,11,13,22,25,27,t:5                         | Z8837933171 | 1{144} | CNS(=O)(=O)c1ccc(N)nc1   | 2{776} | Fc1cc(C#C)c(F)c1C=O     | 3{22} | [C-]<br>#[N+]C1COCC1             | 29.1 | 26 |
| 1718 | 4{187,777,12} | COC(C1CCCC1)C1=C(NCC2CCOC2)N2C=C(C1)C(=CC2=N1)C#N  c:9,23,26,t:20                                              | Z8878918559 | 1{187} | Nc1cc(C#N)c(Cl)cn1       | 2{777} | COC(C=O)C1CCCC1         | 3{12} | [C-]<br>#[N+]CC1CCOC1            | 27.0 | 26 |
| 1719 | 4{380,406,23} | COC(=O)CCC(NC1=C(N=C2N1C=C(Cl)N=C2C)C1=CC=NS1)C(=O)OC<br> c:10,17,23,t:8,14,21                                 | Z8878918820 | 1{380} | Cc1nc(Cl)cn1N            | 2{406} | O=Cc1ccns1              | 3{23} | COC(=O)CC<br>C([N+]#[C-])C(=O)OC | 29.3 | 26 |
| 1720 | 4{47,469,6}   | CCOC(=O)CCCN1=C(N=C2C=C(C=CN12)S(N)(=O)=O)C1CCSC1  c:13,15,t:9,11                                              | Z8878918614 | 1{47}  | Cl.Nc1cc(ccn1)S(=O)(=O)N | 2{469} | O=CC1CCSC1              | 3{6}  | CCOC(=O)C<br>CC[N+]#[C-]         | 28.2 | 25 |
| 1721 | 4{49,116,13}  | COC1=CC=C(CNC2=C(N=C3C=CC=C(CO)N23)C2=CN(CCC=C)N=N2)C=C1<br> c:12,28,31,t:2,4,8,10,14,21                       | Z8854581145 | 1{49}  | Nc1cccc(CO)n1            | 2{116} | C=CCCN1cc(C=O)nn1       | 3{13} | COc1ccc(C[N+]#[C-])cc1           | 27.6 | 25 |
| 1722 | 4{49,284,13}  | COC1=CC=C(CNC2=C(N=C3C=CC=C(CO)N23)C2=C(C)N=CC=N2)C=C1<br> c:12,21,24,26,29,t:2,4,8,10,14                      | Z8873684722 | 1{49}  | Nc1cccc(CO)n1            | 2{284} | Cc1ncnc1C=O             | 3{13} | COc1ccc(C[N+]#[C-])cc1           | 25.4 | 25 |
| 1723 | 4{50,760,18}  | CC(C)(C)NC1=C(N=C2C=CC=C(N12)P(C)(C)=O)C1=CC(F)=C(C=C1)C1CC1<br> c:9,11,23,25,t:5,7,20                         | Z8873684866 | 1{50}  | CP(=O)(C)c1cccc(N)n1     | 2{760} | Fc1cc(C=O)c1c2cc2       | 3{18} | CC(C)(C)[N+]#[C-]                | 26.9 | 25 |
| 1724 | 4{428,710,10} | CC1=C(C=C(F)C=N1)C1=C(NC2CCOC2)N2C=C(Br)N=CC2=N1  c:6,9,22,25,t:1,3,19                                         | Z8855739115 | 1{428} | Nc1nc(Br)cn1             | 2{710} | Cc1ncc(F)cc1C=O         | 3{10} | [C-]<br>#[N+]C1CCOCC1            | 26.4 | 25 |
| 1725 | 4{79,420,13}  | COC1=CC=C(CNC2=C(CC(C)(C)C#N)N=C3C=NC=C(C)N23)C=C1  c:8,18,26,t:2,4,16,20                                      | Z8873684695 | 1{79}  | Cc1ncc(N)n1              | 2{420} | CC(C)(CC=O)C#N          | 3{13} | COc1ccc(C[N+]#[C-])cc1           | 23.5 | 25 |
| 1726 | 4{36,396,9}   | CNC1=C(N=C2C=CC(Br)=CN12)C1=CN=C2COCCN12  c:6,9,t:2,4,14,16                                                    | Z8855739232 | 1{36}  | Nc1ccc(Br)cn1            | 2{396} | O=Cc1cnc2COCCn12        | 3{9}  | C[N+]#[C-]                       | 23.1 | 25 |
| 1727 | 4{120,778,38} | CCOC(=O)C1=NN(C)C(=N1)C1=C(NC2=CC3=C(OCO3)C=C2)N2C=CC(=CC2=N1)C1=CN(C)N=C1  c:9,12,23,27,29,32,39,t:5,15,17,35 | Z8878918472 | 1{120} | Cn1cc(cn1)c2ccnc(N)c2    | 2{778} | CCOC(=O)c1nc(C=O)n(C)n1 | 3{38} | [C-]<br>#[N+]c1ccc2OCOc2c1       | 32.2 | 24 |
| 1728 | 4{139,104,46} | CC(=C)CNC1=C(N=C2C=C(C=CN12)C(F)F)C1=NC(C)=CO1  c:9,11,22,t:5,7,19                                             | Z8873684776 | 1{139} | Nc1cc(cen1)C(F)F         | 2{104} | Cc1coc(C=O)n1           | 3{46} | CC(=C)C[N+]#[C-]                 | 21.0 | 24 |

|      |               |                                                                                                     |             |        |                               |        |                                 |       |                                      |      |    |
|------|---------------|-----------------------------------------------------------------------------------------------------|-------------|--------|-------------------------------|--------|---------------------------------|-------|--------------------------------------|------|----|
| 1729 | 4{41,25,9}    | CNC1=C(N=C2C=NC(C)=CN12)C1=CN=C(N=C1)C1CCOCC1  c:6,9,16,18,t:2,4,14                                 | Z8837933133 | 1{41}  | Cc1enc(N)c<br>n1              | 2{25}  | O=Cc1enc(n<br>c1)C2CCOC<br>C2   | 3{9}  | C[N+]#[C-]                           | 21.4 | 24 |
| 1730 | 4{146,608,72} | CC1=C(NC2=C(CC3(CCC3)C#N)N=C3C=CC<br>(=CN23)S(C)(=O)=O)C=CC(F)=C1<br> c:1,4,16,18,27,30,t:14        | Z8835022903 | 1{146} | CS(=O)(=O)<br>c1ccc(N)nc<br>1 | 2{608} | O=CCC1(CC<br>C1)C#N             | 3{72} | Cc1cc(F)ccc<br>1[N+]#[C-]            | 27.2 | 24 |
| 1731 | 4{397,312,23} | COC(=O)CCC(NC1=C(N=C2N1C=CC(C)=C2<br>C)C1CCOC1(C)C)C(=O)OC  c:10,14,17,t:8                          | Z8873684611 | 1{397} | Cl.Cc1ccnc(<br>N)c1C          | 2{312} | CC1(C)OCC<br>C1C=O              | 3{23} | COC(=O)CC<br>C([N+]#[C-<br>])C(=O)OC | 27.4 | 24 |
| 1732 | 4{70,115,32}  | COC1=NN(C)C(=C1)C1=C(NC2CCC2)N2C=<br>CN=C(C3CC3)C2=N1  c:6,9,18,27,t:2,20                           | Z8873685440 | 1{70}  | Nc1ncnc1<br>C2CC2             | 2{115} | COc1cc(C=O<br>)n(C)n1           | 3{32} | [C-<br>]#[N+]C1CC<br>C1              | 22.1 | 24 |
| 1733 | 4{138,236,61} | CC(C)(C)OC(=O)NCCCNC1=C(CCC2OCCO2<br>N)=C2C=CC=C(F)N12  c:12,24,t:22,26                             | Z8878918528 | 1{138} | Nc1cccc(F)<br>n1              | 2{236} | O=CCCC1O<br>CCO1                | 3{61} | CC(C)(C)OC<br>(=O)NCCC[<br>N+]#[C-]  | 26.7 | 24 |
| 1734 | 4{428,334,10} | CC1=C(N=CO1)C1=C(NC2CCOC2)N2C=C(B<br>r)N=CC2=N1  c:3,7,20,23,t:1,17                                 | Z8878918814 | 1{428} | Nc1enc(Br)<br>cn1             | 2{334} | Cc1ocnc1C=<br>O                 | 3{10} | [C-<br>]#[N+]C1CC<br>OC1             | 23.7 | 24 |
| 1735 | 4{230,320,50} | CC(O)C1=CC(Br)=CN2C(NC3=CC4=C(OCC<br>O4)C=C3)=C(N=C12)C1=NN(C)C=N1<br> c:6,20,22,32,t:3,11,13,24,28 | Z8873685280 | 1{230} | CC(O)c1cc(<br>Br)enc1N        | 2{320} | Cn1enc(C=O<br>)n1               | 3{50} | [C-<br>]#[N+]c1ccc<br>2OCCOc2c1      | 30.7 | 24 |
| 1736 | 4{150,131,15} | CCNC1=C(N=C2C=C(C=CN12)C1CCOC1)C1<br>=NC(=NN1)C1CC1  c:7,9,22,t:3,5,20                              | Z8855619710 | 1{150} | Nc1cc(ccn1<br>)C2CCOC2        | 2{131} | O=Cc1nc(n[n<br>H]1)C2CC2        | 3{15} | CC[N+]#[C-]                          | 22.0 | 24 |
| 1737 | 4{38,697,9}   | CCC1=NC=C(N1)C1=C(NC)N2C=CC(=CC2=<br>N1)C#N  c:4,8,13,15,18,t:2                                     | Z8837933174 | 1{38}  | Nc1cc(C#N<br>)ccn1            | 2{697} | CCc1ncc(C=<br>O)[nH]1           | 3{9}  | C[N+]#[C-]                           | 17.3 | 24 |
| 1738 | 4{361,164,28} | CCCNC1=C(N=C2N1C=CC=C2OC(C)C)C1=<br>NN(C)C2=C1COCC2  c:6,10,12,23,t:4,19                            | Z8855739088 | 1{361} | Cl.CC(C)Oc<br>1ccnc1N         | 2{164} | Cn1nc(C=O)<br>c2COCCc21         | 3{28} | CCC[N+]#[C-<br>]                     | 23.9 | 24 |
| 1739 | 4{161,49,11}  | CC1=NNC=C1C1=C(NCC2=CC(Br)=CC=C2)<br>N2N=CC=CC2=N1<br> c:4,7,14,16,20,22,25,t:1,11                  | Z8873685264 | 1{161} | Nc1ccenn1                     | 2{49}  | Cc1n[nH]cc1<br>C=O              | 3{11} | Brc1cccc(C[<br>N+]#[C-])c1           | 24.8 | 24 |
| 1740 | 4{399,779,22} | COC1=C2NC=NC2=CC(=C1)C1=C(NC2COC<br>2)N2N=C(OC(C)C)C=CC2=N1<br> c:2,5,8,10,13,28,31,t:22            | Z8854581138 | 1{399} | CC(C)Oc1c<br>cc(N)nn1         | 2{779} | COc1cc(C=O<br>)cc2nc[nH]c1<br>2 | 3{22} | [C-<br>]#[N+]C1CO<br>C1              | 25.1 | 24 |

|      |               |                                                                                                                  |             |        |                                  |        |                                               |       |                                      |      |    |
|------|---------------|------------------------------------------------------------------------------------------------------------------|-------------|--------|----------------------------------|--------|-----------------------------------------------|-------|--------------------------------------|------|----|
| 1741 | 4{124,460,61} | CC1=CN=C(O1)C1=C(NCCCNC(=O)OC(C)(C)C)N2C=CC=C(CO)C2=N1<br> c:3,7,22,29,t:1,24                                    | Z8873684796 | 1{124} | Ne1ncccc1<br>CO                  | 2{460} | Cc1cnc(C=O)<br>o1                             | 3{61} | CC(C)(C)OC<br>(=O)NCCC[<br>N+]#[C-]  | 25.4 | 23 |
| 1742 | 4{436,235,23} | CCC1=CC2=NC(C3=CSC(=C3)C#N)=C(NC(C<br>CC(=O)OC)C(=O)OC)N2C=C1<br> c:10,30,t:2,4,7,14                             | Z8873684840 | 1{436} | CCc1cncnc(<br>N)c1               | 2{235} | O=Cc1csc(C<br>#N)c1                           | 3{23} | COC(=O)CC<br>C([N+]#[C-<br>])C(=O)OC | 26.8 | 23 |
| 1743 | 4{54,780,37}  | COC(=O)C1CC(C1)NC1=C(N=C2C=CC(=CN<br>12)C(=O)N(C)C)[C@@H]1C[C@H]1C1=CSC<br>=C1  &1:23,25,r,c:14,16,33,t:10,12,30 | Z8873684637 | 1{54}  | Cl.CN(C)C(<br>=O)c1ccc(N<br>)nc1 | 2{780} | O=C[C@@H<br>]1C[C@H]1c<br>2ccsc2<br> &1:2,4,r | 3{37} | COC(=O)C1<br>CC(C1)[N+]<br>#[C-]     | 27.0 | 23 |
| 1744 | 4{32,744,7}   | CP(C)(=O)C1=CC2=NC(=C(NC3CCOCC3)N2<br>C=C1)C1=C(F)C=CC(=C1)C#C<br> c:20,23,26,28,t:4,6,8                         | Z8873684685 | 1{32}  | CP(=O)(C)c<br>1cnc(N)c1          | 2{744} | Fc1ccc(C#C)<br>cc1C=O                         | 3{7}  | [C-<br>]#[N+]C1CC<br>OCC1            | 25.3 | 23 |
| 1745 | 4{89,569,67}  | CCC(C)NC1=C(CC2CCOC2=O)N=C2C=CC3<br>=C(NN=C3)N12  c:5,17,22,t:15,19                                              | Z8873684913 | 1{89}  | Ne1ccc2en[<br>nH]c2n1            | 2{569} | O=CCC1CC<br>OC1=O                             | 3{67} | CCC(C)[N+]<br>#[C-]                  | 20.1 | 23 |
| 1746 | 4{78,629,44}  | CC1=CN2N3C(C=C(C)C2=N1)=NC(=C3NCC<br>CCNC(=O)OC(C)(C)C)C1=C(C)C=C(C)C=N1<br> c:10,12,14,30,36,t:1,6,33           | Z8878918890 | 1{78}  | Cc1cn2nc(N<br>)cc(C)c2n1         | 2{629} | Cc1cnc(C=O<br>)c(C)c1                         | 3{44} | CC(C)(C)OC<br>(=O)NCCCC<br>[N+]#[C-] | 29.2 | 23 |
| 1747 | 4{32,439,31}  | COC1=C(C=CC(=C1)C1=C(NCCSC)N2C=CC<br>(=CC2=N1)P(C)(C)=O)S(C)(=O)=O<br> c:4,6,9,17,19,22,t:2                      | Z8873684927 | 1{32}  | CP(=O)(C)c<br>1cnc(N)c1          | 2{439} | COc1cc(C=O<br>)ccc1S(=O)(<br>=O)C             | 3{31} | CSCC[N+]#[<br>C-]                    | 28.2 | 22 |
| 1748 | 4{50,781,18}  | CC(C)(C)NC1=C(N=C2C=CC=C(N12)P(C)(C)<br>=O)C1=CC(Cl)=C(OCCBr)C=C1<br> c:9,11,29,t:5,7,20,23                      | Z8873685421 | 1{50}  | CP(=O)(C)c<br>1cccc(N)n1         | 2{781} | Clc1cc(C=O)<br>ccc1OCCBr                      | 3{18} | CC(C)(C)[N<br>+]#[C-]                | 30.1 | 22 |
| 1749 | 4{101,538,7}  | CN1C=NC=C1C1=C(NC2CCOCC2)N2C=C(C<br>O)C=C(Cl)C2=N1  c:2,4,7,26,t:18,22                                           | Z8854581140 | 1{101} | Ne1ncc(CO<br>)cc1Cl              | 2{538} | Cn1cnc1C=<br>O                                | 3{7}  | [C-<br>]#[N+]C1CC<br>OCC1            | 21.8 | 22 |
| 1750 | 4{161,84,20}  | COC1=CC(C)=C(NC2=C(CCSC)N=C3C=CC=<br>NN23)C=C1  c:8,16,18,23,t:2,5,14                                            | Z8878918342 | 1{161} | Ne1cccenn1                       | 2{84}  | CSCCC=O                                       | 3{20} | COc1ccc([N<br>+]#[C-<br>])c(C)c1     | 19.8 | 22 |
| 1751 | 4{118,782,35} | CSCCNC1=C(N=C2C=CC=C(C(C)O)N12)C<br>1=C2N(C)C(=O)N(C)C2=CC=C1<br> c:10,20,29,31,t:6,8,12                         | Z8873684944 | 1{118} | Cl.CC(O)c1<br>cccc(N)n1          | 2{782} | Cn1c(=O)n(<br>C)c2c(C=O)c<br>cc12             | 3{35} | CSCC[N+]<br>#[C-]                    | 25.5 | 22 |
| 1752 | 4{400,155,15} | CCNC1=C(N=C2C=CC(COC(C)C)=CN12)C1<br>=CN=CN=C1  c:7,14,21,23,t:3,5,19                                            | Z8855739166 | 1{400} | CC(C)OCc1<br>ccc(N)nc1           | 2{155} | O=Cc1cncnc<br>1                               | 3{15} | CC[N+]#[C-]                          | 18.6 | 22 |



|      |               |                                                                                                      |             |        |                               |        |                               |       |                                  |      |    |
|------|---------------|------------------------------------------------------------------------------------------------------|-------------|--------|-------------------------------|--------|-------------------------------|-------|----------------------------------|------|----|
| 1753 | 4{377,34,46}  | CC(=C)CNC1=C(N=C2N1C=CC=C2OCC(F)F)C1=CC=C(C=C1)P(C)(C)=O<br> c:7,11,13,23,25,t:5,21                  | Z8873684633 | 1{377} | Nc1ncccc1<br>OCC(F)F          | 2{34}  | CP(=O)(C)c1<br>ccc(C=O)cc1    | 3{46} | CC(=C)C[N+]<br>#[C-]             | 25.0 | 22 |
| 1754 | 4{414,236,60} | COC(=O)C1=CC(NC2=C(CCC3OCCO3)N=C3C=NC(Cl)=CN23)=CC=C1<br> c:8,20,23,27,29,t:4,18                     | Z8878918661 | 1{414} | Nc1cnc(Cl)<br>cn1             | 2{236} | O=CCCC1O<br>CCO1              | 3{60} | COC(=O)c1c<br>ccc([N+]#[C-])c1   | 23.8 | 22 |
| 1755 | 4{56,783,23}  | COC(=O)CCC(NC1=C(N=C2C=CC(=CN12)C1=NN(C)C=C1)C1=NOC(=C1)C(C)C)C(=O)OC<br> c:12,14,23,29,t:8,10,19,26 | Z8829498623 | 1{56}  | Cn1ccc(n1)<br>c2ccc(N)nc<br>2 | 2{783} | CC(C)c1cc(C<br>=O)no1         | 3{23} | COC(=O)CC<br>C([N+]#[C-])C(=O)OC | 28.3 | 22 |
| 1756 | 4{150,488,35} | CSCCCNC1=C(N=C2C=C(C=CN12)C1CCOC1)C1=CC2=C(NC(=O)CC2)N=C1<br> c:10,12,33,t:6,8,23,25                 | Z8855739215 | 1{150} | Nc1cc(cen1)<br>C2CCOC2        | 2{488} | O=Cc1cnc2N<br>C(=O)CCc2c<br>1 | 3{35} | CSCCC[N+]<br>#[C-]               | 25.6 | 22 |
| 1757 | 4{301,93,32}  | OCC1=NC(=CC=C1)C1=C(NC2CCC2)N2C=C(Cl)C=C(F)C2=N1<br> c:4,6,9,25,t:2,18,21                            | Z8878918582 | 1{301} | Nc1ncc(Cl)<br>cc1F            | 2{93}  | OCc1cccc(C<br>=O)n1           | 3{32} | [C-]<br>#[N+]C1CC<br>C1          | 20.1 | 21 |
| 1758 | 4{351,784,39} | CCOCCNC1=C(N=C2C=CC3=C(C(O)CC3)N12)C1=C(Cl)N=C(OC)N1C<br> c:10,22,t:6,8,12,25                        | Z8873685475 | 1{351} | Nc1ccc2CC<br>C(O)c2n1         | 2{784} | COc1nc(Cl)c<br>(C=O)n1C       | 3{39} | CCOCC[N+]<br>#[C-]               | 23.4 | 21 |
| 1759 | 4{442,177,23} | COC(=O)CCC(NC1=C(CC2CC(C2)C(=O)OC)N=C2N1C=C(Cl)C=C2C)C(=O)OC<br> c:8,20,27,t:24                      | Z8878918316 | 1{442} | Cc1cc(Cl)cn<br>c1N            | 2{177} | COC(=O)C1<br>CC(CC=O)C<br>1   | 3{23} | COC(=O)CC<br>C([N+]#[C-])C(=O)OC | 26.8 | 21 |
| 1760 | 4{469,745,22} | CC1=C(C=CN=C1)C1=C(NC2COC2)N2C=C(OC(F)(F)F)C=CC2=N1<br> c:3,5,8,24,27,t:1,17                         | Z8878918481 | 1{469} | Nc1ccc(OC(F)(F)F)cn1          | 2{745} | Cc1cncccc1C<br>=O             | 3{22} | [C-]<br>#[N+]C1CO<br>C1          | 19.9 | 21 |
| 1761 | 4{99,785,66}  | CCN1N=C(Br)N=C1C1=C(NC(C)C2=CC=CC=C2)N2C=C(C=CC2=N1)S(N)(=O)=O<br> c:6,9,16,18,22,24,27,t:3,14       | Z8873685434 | 1{99}  | Nc1ccc(en1)<br>S(=O)(=O)<br>N | 2{785} | CCn1nc(Br)n<br>c1C=O          | 3{66} | CC([N+]#[C-])c1cccc1             | 28.1 | 21 |
| 1762 | 4{103,786,5}  | COCCNC1=C(N=C2C=NC=C(CO)N12)C1=C(F)C(F)=C(Cl)C=C1<br> c:10,19,26,t:6,8,12,23                         | Z8873684818 | 1{103} | Nc1cnc(C<br>O)n1              | 2{786} | Fe1c(F)c(C=O)ccc1Cl           | 3{5}  | COCCC[N+]<br>#[C-]               | 21.9 | 21 |
| 1763 | 4{188,787,62} | COC(=O)C1=CN=CC2=NC(=C(NC3(CCCC3)C(=O)OC)N12)C1=CC2=C(C=C1)N(C)C(C)=N2<br> c:6,28,30,36,t:4,8,10,26  | Z8873684885 | 1{188} | COC(=O)c1<br>cnc(N)n1         | 2{787} | Cc1nc2cc(C=O)ccc2n1C          | 3{62} | COC(=O)C1(CCCC1)[N+]#[C-]        | 26.2 | 21 |
| 1764 | 4{35,25,13}   | COC1=CC=C(CNC2=C(N=C3C=CC(C)=CN23)C2=CN=C(N=C2)C2CCOCC2)C=C1<br> c:12,15,22,24,34,t:2,4,8,10,20      | Z8873685250 | 1{35}  | Cc1ccc(N)n<br>c1              | 2{25}  | O=Cc1cnc(n<br>c1)C2CCOC<br>C2 | 3{13} | COc1ccc(C[<br>N+]#[C-])cc1       | 24.3 | 21 |

|      |               |                                                                                                             |             |        |                         |        |                              |       |                          |      |    |
|------|---------------|-------------------------------------------------------------------------------------------------------------|-------------|--------|-------------------------|--------|------------------------------|-------|--------------------------|------|----|
| 1765 | 4{138,729,49} | COC1=C(C=CC=C1C#N)C1=C(NC2CC(F)(F)C2)N2C(C=CC=C2F)=N1<br> c:4,6,11,23,25,28,t:2                             | Z8873685330 | 1{138} | Nc1cccc(F)n1            | 2{729} | COc1c(C=O)cccc1C#N           | 3{49} | FC1(F)CC(C1)[N+]#[C-]    | 20.9 | 21 |
| 1766 | 4{396,587,59} | COC1=NOC(C)=C1C1=C(NCCC2=CC(F)=CC=C2)N2N=C(C=CC2=N1)C1=CN(C)N=C1<br> c:6,9,17,19,23,25,28,35,t:2,14,31      | Z8873685432 | 1{396} | Cn1cc(en1)c2ccc(N)nn2   | 2{587} | COc1noc(C)c1C=O              | 3{59} | Fe1cccc(CC[N+]#[C-])c1   | 24.9 | 21 |
| 1767 | 4{128,653,34} | COCCN(C)C1=CN2C(C=C1)=NC(C1C3CCC(F)(F)C13)=C2NCC1CCCO1<br> c:10,12,24,t:6                                   | Z8829498615 | 1{128} | COCCN(C)c1ccc(N)nc1     | 2{653} | FC1(F)CCC2C(C=O)C21          | 3{34} | [C-]#[N+]CC1COCO1        | 23.4 | 21 |
| 1768 | 4{421,306,22} | COC(=O)C1=C(CI)N2C(C=C1)=NC(=C2NC1COC1)C1=CC=C(C=C1)N(C)CCO<br> c:4,9,11,13,24,26,t:22                      | Z8837933165 | 1{421} | COC(=O)c1ccc(N)nc1C1    | 2{306} | CN(CCO)c1ccc(C=O)cc1         | 3{22} | [C-]#[N+]C1CO C1         | 23.9 | 21 |
| 1769 | 4{351,788,39} | CCOCCNC1=C(CC2(CCCC2)NC(=O)OC(C)(C)C)N=C2C=CC3=C(C(O)CC3)N12<br> c:6,25,t:23,27                             | Z8873685499 | 1{351} | Nc1ccc2CC(C(O)c2n1      | 2{788} | CC(C)(C)OC(=O)NC1(CC=O)CCCC1 | 3{39} | CCOCC[N+]#[C-]           | 25.2 | 20 |
| 1770 | 4{254,57,37}  | COC(=O)C1CC(C1)NC1=C(N=C2C=C(C)C(=CN12)C(=O)OC)C1CCOC1<br> c:17,t:10,12,14                                  | Z8878918642 | 1{254} | COC(=O)c1cnc(N)cc1C     | 2{57}  | O=CC1CCOC1                   | 3{37} | COC(=O)C1CC(C1)[N+]#[C-] | 21.2 | 20 |
| 1771 | 4{50,789,18}  | CC(C)(C)NC1=C(N=C2C=CC=C(N12)P(C)(C)=O)C1=CC(F)=C(C=C1)C(F)(F)F<br> c:9,11,23,25,t:5,7,20                   | Z8878918803 | 1{50}  | CP(=O)(C)c1cccc(N)n1    | 2{789} | Fe1cc(C=O)c1cc1C(F)(F)F      | 3{18} | CC(C)(C)[N+]#[C-]        | 23.3 | 20 |
| 1772 | 4{356,110,69} | COC1=C(NC2=C(N=C3C=CC(CI)=C(N23)C(=O)N(C)C)C2=CN=C(C=C2)P(C)(C)=O)C=CC=C1<br> c:2,9,12,24,26,33,35,t:5,7,22 | Z8849597827 | 1{356} | CN(C)C(=O)c1nc(N)ccc1C1 | 2{110} | CP(=O)(C)c1ccc(C=O)cn1       | 3{69} | COc1cccc1[N+]#[C-]       | 27.0 | 20 |
| 1773 | 4{91,790,7}   | COC(=O)C1=C(F)C=C(C=C1F)C1=C(NC2CCOCC2)N2C=C(C=CC2=N1)C(N)=O<br> c:4,7,9,13,24,26,29                        | Z8873684767 | 1{91}  | NC(=O)c1ccc(N)nc1       | 2{790} | COC(=O)c1cc(F)cc(C=O)c1F     | 3{7}  | [C-]#[N+]C1CCOCC1        | 23.3 | 20 |
| 1774 | 4{112,627,24} | CCC1=NC(C)=C(N1)C1=C(NCC2=CC(OC)=CC=C2)N2C(C=NC=C2OC)=N1<br> c:5,9,17,19,24,26,30,t:2,13                    | Z8873685496 | 1{112} | COc1cnc(N)n1            | 2{627} | CCc1nc(C)c(C=O)[nH]1         | 3{24} | COc1cccc(C1[N+]#[C-])c1  | 20.9 | 20 |
| 1775 | 4{199,654,34} | CC(F)(F)C1=CC=CN2C(NCC3CCCC3)=C(CC3=CN=CO3)N=C12<br> c:6,23,t:4,17,21,27                                    | Z8873684785 | 1{199} | CC(F)(F)c1cccnc1N       | 2{654} | O=CCCc1cnco1                 | 3{34} | [C-]#[N+]CC1COCO1        | 20.0 | 20 |
| 1776 | 4{50,791,7}   | CC1=CN2C=CC=C(C2=N1)C1=C(NC2CCOCC2)N2C(C=CC=C2P(C)(C)=O)=N1<br> c:4,6,9,12,24,26,32,t:1                     | Z8854581150 | 1{50}  | CP(=O)(C)c1cccc(N)n1    | 2{791} | Cc1cn2cccc(C=O)c2n1          | 3{7}  | [C-]#[N+]C1CCOCC1        | 22.5 | 20 |

|      |               |                                                                                           |             |        |                                  |        |                                  |       |                                      |      |    |
|------|---------------|-------------------------------------------------------------------------------------------|-------------|--------|----------------------------------|--------|----------------------------------|-------|--------------------------------------|------|----|
| 1777 | 4{209,153,14} | COCCNC1=C(N=C2N1C=CC=C2N1CCCC1)C1=CN(CC(F)(F)F)N=N1  c:7,11,13,31,t:5,23                  | Z8855739191 | 1{209} | Nc1ncccc1<br>N2CCCCC2            | 2{153} | FC(F)(F)Cn1<br>cc(C=O)nn1        | 3{14} | COCC[N+][#<br>C-]                    | 22.5 | 20 |
| 1778 | 4{166,748,15} | CCNC1=C(N=C2C=C(CSCCO)C=CN12)C1=CC(=NN1C)C(F)(F)F  c:14,21,t:3,5,7,19                     | Z8873684936 | 1{166} | Nc1cc(CSC<br>CO)ccn1             | 2{748} | Cn1nc(cc1C<br>=O)C(F)(F)F        | 3{15} | CC[N+][#C-]                          | 21.1 | 20 |
| 1779 | 4{73,77,20}   | COC1=CC(C)=C(NC2=C(CC3CCCC3)N=C3C=CC4=NC=CN4N23)C=C1  c:8,19,23,30,t:2,5,17,21            | Z8873684830 | 1{73}  | Nc1ccc2ncc<br>n2n1               | 2{77}  | O=CCC1CC<br>CC1                  | 3{20} | COc1ccc([N<br>+][#C-<br>])c(C)c1     | 19.8 | 19 |
| 1780 | 4{470,704,39} | CCOCCNC1=C(N=C2C=CC3=C(C=C(C=C3)C(=O)OC)N12)C1=NC(=NN1C)C1CC1  c:10,14,16,28,t:6,8,12,26  | Z8878918435 | 1{470} | COC(=O)c1<br>ccc2ccc(N)n<br>c2c1 | 2{704} | Cn1nc(nc1C<br>=O)C2CC2           | 3{39} | CCOCC[N+]<br>#[C-]                   | 22.1 | 19 |
| 1781 | 4{87,81,23}   | COC(=O)CCC(NC1=C(N=C2C=C(C)C(CI)=CN12)C1=NC(=CC=C1)C(F)F)C(=O)OC  c:16,23,25,t:8,10,12,21 | Z8873684939 | 1{87}  | Cc1cc(N)nc<br>c1Cl               | 2{81}  | FC(F)c1cccc<br>C=O)n1            | 3{23} | COC(=O)CC<br>C([N+][#C-<br>])C(=O)OC | 23.8 | 19 |
| 1782 | 4{83,412,18}  | CSC1=CC(=CC=C1)C1=C(NC(C)(C)C)N2C=C(C=CC2=N1)P(C)(C)O  c:4,6,9,17,19,22,t:2               | Z8878918865 | 1{83}  | CP(=O)(C)c<br>1ccc(N)nc1         | 2{412} | CSelcccc(C=<br>O)c1              | 3{18} | CC(C)(C)[N<br>+][#C-]                | 19.7 | 19 |
| 1783 | 4{99,767,50}  | CCCC(OC)C1=C(NC2=CC3=C(OCCO3)C=C2)N2C=C(C=CC2=N1)S(N)(=O)=O  c:6,18,22,24,27,t:9,11       | Z8873684922 | 1{99}  | Nc1ccc(en1<br>)S(=O)(=O)<br>N    | 2{767} | CCCC(OC)C<br>=O                  | 3{50} | [C-<br>][#N+]c1ccc<br>2OCCOc2c1      | 21.5 | 18 |
| 1784 | 4{184,695,14} | COCCNC1=C(N=C2C=CC(=CN12)C(N)=S)C1=CC(OCC(=O)OC)=C(OC)C=C1  c:9,11,31,t:5,7,19,27         | Z8878918894 | 1{184} | NC(=S)c1cc<br>c(N)nc1            | 2{695} | COC(=O)CO<br>c1cc(C=O)cc<br>c1OC | 3{14} | COCC[N+][#<br>C-]                    | 22.0 | 18 |
| 1785 | 4{275,172,14} | COCCNC1=C(N=C2N1C(CI)=CC=C2F)C1=CN(C=N1)C1CC1  c:7,12,14,21,t:5,18                        | Z8835022886 | 1{275} | Nc1nc(Cl)c<br>cc1F               | 2{172} | O=Cc1c[nH]<br>c(n1)C2CC2         | 3{14} | COCC[N+][#<br>C-]                    | 17.3 | 18 |
| 1786 | 4{455,42,23}  | COC(=O)CCC(NC1=C(N=C2C=C(CI)C=C(CI)N12)C1=CN(C)N=C1Cl)C(=O)OC  c:25,t:8,10,12,15,21       | Z8873684883 | 1{455} | Nc1cc(Cl)cc<br>(Cl)n1            | 2{42}  | Cn1cc(C=O)<br>c(Cl)n1            | 3{23} | COC(=O)CC<br>C([N+][#C-<br>])C(=O)OC | 23.2 | 18 |
| 1787 | 4{379,792,14} | COCCNC1=C(N=C2N1C=CC=C2Br)C1=NN(C)N=C1  c:7,11,13,21,t:5,17                               | Z8878918465 | 1{379} | Nc1ncccc1<br>Br                  | 2{792} | Cn1ncc(C=O<br>)n1                | 3{14} | COCC[N+][#<br>C-]                    | 17.1 | 18 |
| 1788 | 4{103,455,5}  | COCCNC1=C(N=C2C=NC=C(CO)N12)C1=C(C)ON=C1Br  c:10,19,23,t:6,8,12                           | Z8873684822 | 1{103} | Nc1cncc(C<br>O)n1                | 2{455} | Cc1onc(Br)c<br>1C=O              | 3{5}  | COCCC[N+]<br>#[C-]                   | 19.3 | 18 |
| 1789 | 4{371,721,28} | CCCNC1=C(N=C2N1C=CC=C2OCCCC#N)C1=CC(=CN=C1)C(=O)OC  c:6,10,12,23,25,t:4,21                | Z8878918541 | 1{371} | Nc1ncccc1<br>OCCCC#N             | 2{721} | COC(=O)c1c<br>ncc(C=O)c1         | 3{28} | CCC[N+][#C<br>]                      | 19.1 | 18 |

|      |               |                                                                                                     |             |        |                              |        |                               |       |                             |      |    |
|------|---------------|-----------------------------------------------------------------------------------------------------|-------------|--------|------------------------------|--------|-------------------------------|-------|-----------------------------|------|----|
| 1790 | 4{186,746,69} | COC1=C(NC2=C(N=C3C=C(C=CN23)S(=O)(=O)N(C)C)C2=C(C)C=CN=C2)C=CC=C1<br> c:2,9,11,22,25,27,30,32,t:5,7 | Z8855619586 | 1{186} | Cl.CN(C)S(=O)(=O)c1ccnc(N)c1 | 2{746} | Cc1ccnc1C=O                   | 3{69} | COc1cccc1[N+][C-]           | 21.2 | 18 |
| 1791 | 4{50,644,18}  | CC(C)(C)NC1=C(N=C2C=CC=C(N12)P(C)(C)=O)C1=CC(F)=C(OCC#C)C=C1<br> c:9,11,29,t:5,7,20,23              | Z8878918524 | 1{50}  | CP(=O)(C)c1cccc(N)n1         | 2{644} | Fc1cc(C=O)ccc1OCC#C           | 3{18} | CC(C)(C)[N+][C-]            | 20.0 | 18 |
| 1792 | 4{32,793,31}  | CSCCNC1=C(N=C2C=C(C=CN12)P(C)(C)=O)C1=NC=C(S1)C(C)C  c:9,11,22,t:5,7,20                             | Z8873684907 | 1{32}  | CP(=O)(C)c1ccnc(N)c1         | 2{793} | CC(C)c1nc(C=O)s1              | 3{31} | CSCC[N+][C-]                | 19.7 | 18 |
| 1793 | 4{101,260,14} | COCCNC1=C(N=C2N1C=C(CO)C=C2C1)C1=NOC(C)=C1  c:7,15,23,t:5,11,19                                     | Z8873684928 | 1{101} | Nc1ncc(CO)cc1Cl              | 2{260} | Cc1cc(C=O)no1                 | 3{14} | COCC[N+][C-]                | 16.1 | 18 |
| 1794 | 4{99,736,29}  | CCOC(=O)CCNC1=C(N=C2C=CC(=CN12)S(N)(=O)=O)C1CC(C)(C)C1  c:12,14,t:8,10                              | Z8878918655 | 1{99}  | Nc1ccc(en1)S(=O)(=O)N        | 2{736} | CC1(C)CC(C1)C=O               | 3{29} | CCOC(=O)C[N+][C-]           | 18.8 | 18 |
| 1795 | 4{137,69,13}  | COC1=CC=C(CNC2=C(N=C3C=CC(C)=NN23)C2=NN(C)C(C)=C2)C=C1<br> c:12,15,25,28,t:2,4,8,10,20              | Z8873684693 | 1{137} | Cc1ccc(N)n1                  | 2{69}  | Cc1cc(C=O)nn1C                | 3{13} | COc1ccc(C[N+][C-])cc1       | 17.0 | 17 |
| 1796 | 4{36,27,9}    | CNC1=C(N=C2C=CC(Br)=CN12)C1=NN(C)C(C)=N1  c:6,9,19,t:2,4,14                                         | Z8873685408 | 1{36}  | Nc1ccc(Br)cn1                | 2{27}  | Cc1nc(C=O)nn1C                | 3{9}  | C[N+][C-]                   | 15.1 | 17 |
| 1797 | 4{101,727,14} | COCCNC1=C(N=C2N1C=C(CO)C=C2C1)C1=CN=C(N=C1)C(C)C  c:7,15,21,23,t:5,11,19                            | Z8873684769 | 1{101} | Nc1ncc(CO)cc1Cl              | 2{727} | CC(C)c1ncc(C=O)cn1            | 3{14} | COCC[N+][C-]                | 17.4 | 17 |
| 1798 | 4{386,419,23} | COC(=O)CCC(NC1=C(N=C2C=C(C)C=CN12)C1=NC=CC(OC)=C1)C(=O)OC<br> c:15,22,26,t:8,10,12,20               | Z8854581171 | 1{386} | Cc1ccnc(N)c1                 | 2{419} | COc1ccnc(C=O)c1               | 3{23} | COC(=O)CC(C[N+][C-])C(=O)OC | 18.7 | 17 |
| 1799 | 4{171,763,22} | COC(=O)C1=CC2=C(NN=C2C2=C(NC3COC3)N3C=CC(=CC3=N2)N2C=CN=C2)C=C1<br> c:9,12,21,23,26,30,32,35,t:4,6  | Z8873685413 | 1{171} | Nc1cc(ccn1)n2ccnc2           | 2{763} | COC(=O)c1ccc2[nH]nc(C=O)c2c1  | 3{22} | [C-][N+]C1CO C1             | 19.4 | 17 |
| 1800 | 4{37,794,10}  | CC(C)(C)OC(=O)NCCC1=NC(=CS1)C1=C(NC2CCOC2)N2C(C=CC=C2C(F)F)=N1<br> c:12,16,27,29,34,t:10            | Z8873684613 | 1{37}  | Cl.Nc1cccc(en1)C(F)F         | 2{794} | CC(C)(C)OC(=O)NCCc1nc(C=O)cs1 | 3{10} | [C-][N+]C1CCOC1             | 21.4 | 17 |
| 1801 | 4{103,795,5}  | COCCNC1=C(N=C2C=NC=C(CO)N12)C1=C(Br)C=C(Cl)C=C1  c:10,19,25,t:6,8,12,22                             | Z8873685437 | 1{103} | Nc1cnc(CO)n1                 | 2{795} | Clc1ccc(C=O)c(Br)c1           | 3{5}  | COCCC[N+][C-]               | 18.9 | 16 |
| 1802 | 4{184,189,26} | NC(=S)C1=CN2C(NCC3=CC=C(F)C=C3)=C(N=C2C=C1)C1=CN(N=N1)C1CCOCC1<br> c:14,16,18,21,27,t:3,9,11,24     | Z8878918818 | 1{184} | NC(=S)c1ccc(N)n1             | 2{189} | O=Cc1cn(nn1)C2CCOCC2          | 3{26} | Fc1ccc(C[N+][C-])cc1        | 20.0 | 16 |

|      |               |                                                                                                           |             |        |                                     |        |                               |       |                                               |      |    |
|------|---------------|-----------------------------------------------------------------------------------------------------------|-------------|--------|-------------------------------------|--------|-------------------------------|-------|-----------------------------------------------|------|----|
| 1803 | 4{382,459,62} | COC(=O)C1(CCCC1)NC1=C(N=C2C=NC(=C<br>N12)C(F)(F)F)C1=NNC(C)=C1C<br> c:15,17,30,t:11,13,26                 | Z8873684931 | 1{382} | Nc1cnc(en1<br>)C(F)(F)F             | 2{459} | Cc1[nH]nc(C<br>=O)c1C         | 3{62} | COC(=O)C1(<br>CCCC1)[N+]<br>#[C-]             | 18.1 | 16 |
| 1804 | 4{124,796,43} | COC(=O)C1=C(F)C=C(C=N1)C1=C(NC2CCN<br>(CC2)C(=O)OC(C)(C)C)N2C=CC=C(CO)C2=<br>N1  c:4,7,9,12,30,37,t:32    | Z8878918505 | 1{124} | Nc1ncccc1<br>CO                     | 2{796} | COC(=O)c1n<br>cc(C=O)cc1F     | 3{43} | CC(C)(C)OC<br>(=O)N1CCCC<br>(CC1)[N+]#<br>C-] | 21.3 | 16 |
| 1805 | 4{373,85,39}  | CCOCCNC1=C(N=C2C=CC(CNC(=O)OC(C)<br>(C)C)=CN12)C1=CN=NS1  c:10,21,28,t:6,8,26                             | Z8878918358 | 1{373} | CC(C)(C)O<br>C(=O)NCc1<br>ccc(N)nc1 | 2{85}  | O=Cc1cnns1                    | 3{39} | CCOCC[N+]<br>#[C-]                            | 19.0 | 16 |
| 1806 | 4{142,242,21} | CS(=O)(=O)CCOC1=CC=CN2C(NCC3CC3)=<br>C(N=C12)C1=CN2N=CC(C#N)=C2N=C1<br> c:9,18,27,31,34,t:7,20,24         | Z8878918674 | 1{142} | CS(=O)(=O<br>)CCOc1ccc<br>nc1N      | 2{242} | O=Cc1cnc2c<br>(C#N)cnn2c1     | 3{21} | [C-<br>]#[N+]CC1C<br>C1                       | 19.0 | 16 |
| 1807 | 4{101,538,14} | COCCNC1=C(N=C2N1C=C(CO)C=C2C1)C1=<br>CN=CN1C  c:7,15,21,t:5,11,19                                         | Z8878918498 | 1{101} | Nc1ncc(CO<br>)cc1Cl                 | 2{538} | Cn1cncclC=<br>O               | 3{14} | COCC[N+]#<br>C-]                              | 14.1 | 16 |
| 1808 | 4{375,375,51} | COCC1=C(N=CO1)C1=C(NCCNC(=O)OC(C)<br>(C)C)N2C(C=NC=C2OC(C)C)=N1<br> c:5,9,24,26,32,t:3                    | Z8855619770 | 1{375} | CC(C)Oclc<br>ncc(N)n1               | 2{375} | COCC1ocnc1<br>C=O             | 3{51} | CC(C)(C)OC<br>(=O)NCC[N<br>+]#[C-]            | 18.7 | 15 |
| 1809 | 4{79,733,13}  | COC1=CC=C(CNC2=C(N=C3C=NC=C(C)N2<br>3)C2=NN(N=N2)C(C)(C)C)C=C1<br> c:12,23,30,t:2,4,8,10,14,20            | Z8854581174 | 1{79}  | Cc1cnc(N)<br>n1                     | 2{733} | CC(C)(C)n1n<br>nc(C=O)n1      | 3{13} | COc1ccc(C[<br>N+]#[C-])cc1                    | 15.8 | 15 |
| 1810 | 4{48,797,22}  | CS(=O)(=O)C1=CC2=NC(=C(NC3COC3)N2C<br>=C1)C1=C(F)C=NC=C1  c:18,21,24,26,t:4,6,8                           | Z8878918421 | 1{48}  | CS(=O)(=O<br>)c1ccnc(N)c<br>1       | 2{797} | Fc1cncclC=<br>O               | 3{22} | [C-<br>]#[N+]C1CO<br>C1                       | 14.9 | 15 |
| 1811 | 4{54,689,53}  | CN(C)C(=O)C1=CN2C(C=C1)=NC(C1=CN(C<br>COC(C)=O)N=C1)=C2NCCOCC1=CC=CC=C<br>1  c:9,11,23,25,35,37,t:5,14,33 | Z8878918851 | 1{54}  | Cl.CN(C)C(<br>=O)c1ccc(N<br>)nc1    | 2{689} | CC(=O)OCC<br>n1cc(C=O)cn<br>1 | 3{53} | [C-<br>]#[N+]CCOC<br>c1cccc1                  | 19.5 | 15 |
| 1812 | 4{464,271,70} | CN1N=NC(=N1)C1=C(NC2CCN(C2)C(=O)O<br>C(C)(C)C)N2C=C(C=CC2=N1)N1CCN(C)CC<br>1  c:2,4,7,24,26,29            | Z8837933135 | 1{464} | CN1CCN(C<br>C1)c2ccc(N<br>)nc2      | 2{271} | Cn1nnc(C=O<br>)n1             | 3{70} | CC(C)(C)OC<br>(=O)N1CCCC<br>(C1)[N+]#<br>[C-] | 18.9 | 15 |
| 1813 | 4{433,340,31} | CCN1C=NC(=N1)C1=C(NCCSC)N2C(C=CC(<br>C#C)=C2C)=N1  c:3,5,8,17,21,24                                       | Z8878918539 | 1{433} | Cc1nc(N)cc<br>c1C#C                 | 2{340} | CCn1cnc(C=<br>O)n1            | 3{31} | CSCC[N+]#<br>[C-]                             | 13.3 | 14 |
| 1814 | 4{78,798,51}  | CN1C=C(N=N1)C1=C(NCCNC(=O)OC(C)(C)<br>C)N2N3C=C(C)N=C3C(C)=CC2=N1<br> c:2,4,7,25,29,32,t:22               | Z8878918911 | 1{78}  | Cc1cn2nc(N<br>)cc(C)c2n1            | 2{798} | Cn1cc(C=O)<br>nn1             | 3{51} | CC(C)(C)OC<br>(=O)NCC[N<br>+]#[C-]            | 16.6 | 14 |

|      |               |                                                                                                          |             |        |                                 |        |                                     |       |                                     |      |    |
|------|---------------|----------------------------------------------------------------------------------------------------------|-------------|--------|---------------------------------|--------|-------------------------------------|-------|-------------------------------------|------|----|
| 1815 | 4{340,725,5}  | CCOC1=CC=CN2C(NCCCCO)=C(N=C12)C1=CN=NN1CC  c:5,14,22,t:3,16,20                                           | Z8873685248 | 1{340} | CCOc1cccn<br>c1N                | 2{725} | CCn1nnc1C<br>=O                     | 3{5}  | COCCC[N+]<br>#[C-]                  | 13.3 | 14 |
| 1816 | 4{185,799,8}  | COC(=O)C(CC1=CC=CC=C1)NC1=C(N=C2C=CC(=C(C)N12)S(C)(=O)=O)C1=NN=C(C)C=C1  c:8,10,18,35,t:6,14,16,20,30,32 | Z8878918436 | 1{185} | Cc1nc(N)cc<br>c1S(=O)(=O)<br>)C | 2{799} | Cc1ccc(C=O)<br>)nn1                 | 3{8}  | COC(=O)C(<br>Cc1cccc1)[<br>N+]#[C-] | 18.4 | 14 |
| 1817 | 4{154,800,47} | CC(C)NC1=C(N=C2C=C(C=CN12)[N+](=[O-])=O)C1=CC2=C(NC(=O)CO)C=C1  c:8,10,28,t:4,6,18,20                    | Z8873684917 | 1{154} | Nc1cc(ccn1)<br>)N+](=O)[<br>O-] | 2{800} | O=Cc1ccc2N<br>C(=O)COc2c<br>1       | 3{47} | CC(C)[N+]#[<br>C-]                  | 14.1 | 14 |
| 1818 | 4{48,277,31}  | CSCCNC1=C(CC(NC(=O)OC(C)(C)C)C2CC2)N=C2C=C(C=CN12)S(C)(=O)=O  c:5,23,25,t:21                             | Z8835022868 | 1{48}  | CS(=O)(=O)<br>c1ccnc(N)c<br>1   | 2{277} | CC(C)(C)OC<br>(=O)NC(CC<br>=O)C1CC1 | 3{31} | CSCC[N+]#[<br>C-]                   | 17.9 | 14 |
| 1819 | 4{462,801,39} | CCOCCNC1=C(N=C2N1C=C(Br)C=C2CO)C1=CN=C(S1)C1=CN(C)N=C1  c:8,15,22,30,t:6,12,20,26                        | Z8855619696 | 1{462} | Nc1ncc(Br)<br>cc1CO             | 2{801} | Cn1cc(en1)c<br>2ncc(C=O)s2          | 3{39} | CCOCC[N+]<br>#[C-]                  | 18.1 | 14 |
| 1820 | 4{99,802,34}  | NS(=O)(=O)C1=CN2C(NCC3CCCO3)=C(N=C2C=C1)C1=CN2C=CN=C2S1  c:15,17,20,26,28,t:4,23                         | Z8878918406 | 1{99}  | Nc1ccc(en1)<br>)S(=O)(=O)<br>N  | 2{802} | O=Cc1en2cc<br>nc2s1                 | 3{34} | [C-]<br>]#[N+]CC1C<br>CCO1          | 15.8 | 14 |
| 1821 | 4{79,421,9}   | CNC1=C(N=C2C=NC=C(C)N12)C1=CN=C(S1)C1=CC=CO1  c:6,16,22,t:2,4,8,14,20                                    | Z8873685441 | 1{79}  | Cc1cncc(N)<br>n1                | 2{421} | O=Cc1cnc(s1)<br>c2cccc2             | 3{9}  | C[N+]#[C-]                          | 11.7 | 14 |
| 1822 | 4{445,803,29} | CCOC(=O)CCNC1=C(N=C2C=NC(SC)=CN12)C1=CC=C(C=C1)C1=NN=C(C)N=N1  c:12,16,23,25,33,t:8,10,21,28,30          | Z8873684851 | 1{445} | CSc1cnc(N)<br>cn1               | 2{803} | Cc1nnc(nn1)<br>c2ccc(C=O)c<br>c2    | 3{29} | CCOC(=O)C<br>C[N+]#[C-]             | 16.7 | 14 |
| 1823 | 4{414,804,46} | CN1C=NC(Br)=C1C1=C(NCC(C)=C)N2C=C(Cl)N=CC2=N1  c:2,5,8,19,22,t:16                                        | Z8873685477 | 1{414} | Nc1cnc(Cl)<br>cn1               | 2{804} | Cn1cnc(Br)c<br>1C=O                 | 3{46} | CC(=C)C[N+]<br>]#[C-]               | 14.1 | 14 |
| 1824 | 4{452,134,51} | COC1=NC(=NC=C1)C1=C(NCCNC(=O)OC(C)(C)C)N2C(C=CC3=C2C=NC=C3)=N1  c:4,6,9,24,26,29,31,33,t:2               | Z8878918681 | 1{452} | Nc1ccc2ccn<br>cc2n1             | 2{134} | COc1ccnc(C<br>=O)n1                 | 3{51} | CC(C)(C)OC<br>(=O)NCC[N<br>+]#[C-]  | 16.0 | 14 |
| 1825 | 4{471,538,14} | COCCNC1=C(N=C2N1C=C(C)C=C2)C1=CN=CN1C  c:7,14,20,t:5,11,18                                               | Z8873684926 | 1{471} | Cc1cnc(N)c<br>(I)c1             | 2{538} | Cn1cncc1C=<br>O                     | 3{14} | COCC[N+]#[<br>C-]                   | 15.1 | 14 |
| 1826 | 4{154,805,47} | CC(C)NC1=C(N=C2C=C(C=CN12)[N+](=[O-])=O)C1=CC=C(C=C1)S(=O)(=O)N(C)C  c:8,10,20,22,t:4,6,18               | Z8878918643 | 1{154} | Nc1cc(ccn1)<br>)N+](=O)[<br>O-] | 2{805} | CN(C)S(=O)<br>(=O)c1ccc(C<br>=O)cc1 | 3{47} | CC(C)[N+]#[<br>C-]                  | 14.7 | 14 |
| 1827 | 4{176,538,14} | COCCNC1=C(N=C2N1C=CN=C2N1CCCC1)C1=CN=CN1C  c:7,11,13,24,t:5,22                                           | Z8837933141 | 1{176} | Nc1ncnc1<br>N2CCCC2             | 2{538} | Cn1cncc1C=<br>O                     | 3{14} | COCC[N+]#[<br>C-]                   | 12.4 | 13 |

|      |               |                                                                                                     |             |        |                                  |        |                                 |       |                                   |      |    |
|------|---------------|-----------------------------------------------------------------------------------------------------|-------------|--------|----------------------------------|--------|---------------------------------|-------|-----------------------------------|------|----|
| 1828 | 4{91,806,7}   | NC(=O)C1=CN2C(C=C1)=NC(=C2NC1CCOC<br>C1)C1=NC2=C(C=C1)C(F)=CC(F)=C2<br> c:7,9,11,24,26,30,33,t:3,22 | Z8873684756 | 1{91}  | NC(=O)c1c<br>cc(N)nc1            | 2{806} | Fc1cc(F)c2cc<br>c(C=O)nc2c1     | 3{7}  | [C-<br>]#[N+]C1CC<br>OCC1         | 15.3 | 13 |
| 1829 | 4{472,685,6}  | CCOC(=O)CCCNC1=C(N=C2N1C=C(C=C2C<br>#N)C(C)C)C1=CN(CC2CCOC2)N=N1<br> c:11,15,17,35,t:9,25           | Z8855619511 | 1{472} | CC(C)c1enc<br>(N)c(C#N)c<br>1    | 2{685} | O=Cc1cn(CC<br>2CCOC2)nn1        | 3{6}  | CCOC(=O)C<br>CC[N+]#[C-]          | 16.8 | 13 |
| 1830 | 4{47,172,6}   | CCOC(=O)CCCNC1=C(N=C2C=C(C=CN12)S<br>(N)(=O)=O)C1=CNC(=N1)C1CC1<br> c:13,15,27,t:9,11,24            | Z8878918607 | 1{47}  | Cl.Nc1cc(cc<br>n1)S(=O)(=O)<br>N | 2{172} | O=Cc1c[nH]<br>c(n1)C2CC2        | 3{6}  | CCOC(=O)C<br>CC[N+]#[C-]          | 15.5 | 13 |
| 1831 | 4{137,94,20}  | COC1=CC(C)=C(NC2=C(N=C3C=CC(C)=NN<br>23)C2=NC=CN=C2)C=C1<br> c:12,15,22,24,27,t:2,5,8,10,20         | Z8873685256 | 1{137} | Cc1ccc(N)n<br>n1                 | 2{94}  | O=Cc1cncn<br>1                  | 3{20} | COc1ccc([N<br>+]#[C-]<br>]c(C)c1  | 12.4 | 13 |
| 1832 | 4{22,151,13}  | COC1=CC=C(CNC2=C(N=C3C=CC(CI)=NN2<br>3)C2=CC(C)=NN2)C=C1<br> c:12,15,23,27,t:2,4,8,10,20            | Z8878918393 | 1{22}  | Nc1ccc(Cl)<br>nn1                | 2{151} | Cc1cc(C=O)[<br>nH]n1            | 3{13} | COc1ccc(C[<br>N+]#[C-])cc1        | 12.9 | 13 |
| 1833 | 4{390,189,22} | CCC1=C(Cl)N2C(NC3COC3)=C(N=C2C=C1)<br>C1=CN(N=N1)C1CCOCC1<br> c:2,12,14,17,23,t:20                  | Z8849597832 | 1{390} | CCc1ccc(N)<br>nc1Cl              | 2{189} | O=Cc1cn(nn<br>1)C2CCOCC<br>2    | 3{22} | [C-<br>]#[N+]C1CO<br>C1           | 14.1 | 13 |
| 1834 | 4{354,704,62} | COC(=O)C1=CN2C(C=C1)=NC(=C2NC1(CC<br>CC1)C(=O)OC)C1=NC(=NN1C)C1CC1<br> c:8,10,12,28,t:4,26          | Z8837933143 | 1{354} | COC(=O)c1c<br>ccc(N)nc1          | 2{704} | Cn1nc(nc1C<br>=O)C2CC2          | 3{62} | COC(=O)C1(<br>CCCC1)[N+]<br>#[C-] | 15.2 | 13 |
| 1835 | 4{193,199,21} | CNC(=O)C1=CN2C(C=C1)=NC(CN1C(=O)C3<br>=C(C=CC=C3)C1=O)=C2NCC1CC1<br> c:8,10,19,21,26,t:4,17         | Z8873684696 | 1{193} | CNC(=O)c1c<br>ccc(N)nc1          | 2{199} | O=CCN1C(=<br>O)c2ccccc2C<br>1=O | 3{21} | [C-<br>]#[N+]CC1C<br>C1           | 13.7 | 13 |
| 1836 | 4{118,347,35} | CCCN1C=C(N=N1)C1=C(NCCCSC)N2C(C=<br>CC=C2C(C)O)=N1  c:4,6,9,19,21,26                                | Z8873684940 | 1{118} | Cl.CC(O)c1c<br>cccc(N)n1         | 2{347} | CCCN1cc(C=<br>O)nn1             | 3{35} | CSCCC[N+]<br>#[C-]                | 12.6 | 12 |
| 1837 | 4{391,425,47} | CC(C)NC1=C(N=C2C=CC(=NN12)C1=C(F)C<br>=CC=C1)C1CCCN(C1)S(C)(=O)=O<br> c:8,10,15,18,20,t:4,6         | Z8837933176 | 1{391} | Nc1ccc(nn1)<br>c2ccccc2F         | 2{425} | CS(=O)(=O)<br>N1CCCC(C1<br>)C=O | 3{47} | CC(C)[N+]#[<br>C-]                | 14.5 | 12 |
| 1838 | 4{119,647,10} | N#CC1=CN2C(C=C1)=NC(=C2NC1CCOC1)C<br>1=CC2=C(OC=C2)C=C1<br> c:6,8,10,25,28,t:2,20,22                | Z8878918848 | 1{119} | Nc1ccc(C#<br>N)cn1               | 2{647} | O=Cc1ccc2o<br>ccc2c1            | 3{10} | [C-<br>]#[N+]C1CC<br>OC1          | 11.2 | 12 |
| 1839 | 4{146,111,12} | CS(=O)(=O)C1=CN2C(C=C1)=NC(C1CCCC1<br>)=C2NCC1CCOC1  c:8,10,18,t:4                                  | Z8878918852 | 1{146} | CS(=O)(=O)<br>c1ccc(N)nc<br>1    | 2{111} | O=CC1CCC<br>C1                  | 3{12} | [C-<br>]#[N+]CC1C<br>COC1         | 11.4 | 12 |
| 1840 | 4{32,659,18}  | CN1C=C2C(C=CC=C2C2=C(NC(C)(C)C)N3C<br>=CC(=CC3=N2)P(C)(C)=O)=N1<br> c:2,5,7,10,18,20,23,29          | Z8878918543 | 1{32}  | CP(=O)(C)c<br>1ccnc(N)c1         | 2{659} | Cn1cc2c(C=<br>O)cccc2n1         | 3{18} | CC(C)(C)[N<br>+]#[C-]             | 12.1 | 11 |

|      |               |                                                                                                        |             |        |                        |        |                             |       |                           |      |    |
|------|---------------|--------------------------------------------------------------------------------------------------------|-------------|--------|------------------------|--------|-----------------------------|-------|---------------------------|------|----|
| 1841 | 4{83,807,18}  | CC(C)(C)NC1=C(N=C2C=CC(=CN12)P(C)(C)=O)C1=C2N=CC=CC2=CC(F)=C1<br> c:9,11,20,22,24,27,30,t:5,7          | Z8855739224 | 1{83}  | CP(=O)(C)c1ccc(N)nc1   | 2{807} | Fc1cc(C=O)c2ncccc2c1        | 3{18} | CC(C)(C)[N+][C-]          | 12.5 | 11 |
| 1842 | 4{46,170,9}   | CCN1N=NC(=N1)C1=C(NC)N2C=CC=CC2=N1<br> c:3,5,8,13,15,18                                                | Z8873684867 | 1{46}  | Nc1ccccn1              | 2{170} | CCn1nnc(C=O)n1              | 3{9}  | C[N+][C-]                 | 7.3  | 11 |
| 1843 | 4{28,790,7}   | COC(=O)C1=C(F)C=C(C=C1F)C1=C(NC2CCOCC2)N2C=CC(=CC2=N1)C1=NOC=N1<br> c:4,7,9,13,24,26,29,35,t:32        | Z8873684576 | 1{28}  | Cl.Nc1cc(ccn1)c2ncon2  | 2{790} | COC(=O)c1c(F)cc(C=O)c1F     | 3{7}  | [C-][N+]C1CCOCC1          | 13.5 | 11 |
| 1844 | 4{83,808,18}  | CC1=C(Cl)N=C(C2=C(NC(C)(C)C)N3C=C(C=CC3=N2)P(C)(C)=O)C(F)=C1<br> c:1,6,14,16,19,27,t:4                 | Z8855619564 | 1{83}  | CP(=O)(C)c1ccc(N)nc1   | 2{808} | Cc1cc(F)c(C=O)nc1Cl         | 3{18} | CC(C)(C)[N+][C-]          | 11.8 | 11 |
| 1845 | 4{473,809,15} | CCNC1=C(N=C2C=CC=C(N12)C(=O)OCC)C1=CN=C(S1)C(=O)OCC<br> c:7,9,21,t:3,5,19                              | Z8854581170 | 1{473} | Cl.CCOC(=O)c1cccc(N)n1 | 2{809} | CCOC(=O)c1ncc(C=O)s1        | 3{15} | CC[N+][C-]                | 11.1 | 11 |
| 1846 | 4{22,44,13}   | CCN1C=C(C=N1)C1=C(NCC2=CC=C(OC)C=C2)N2N=C(Cl)C=CC2=N1<br> c:3,5,8,18,25,28,t:12,14,22                  | Z8878918382 | 1{22}  | Nc1ccc(Cl)nn1          | 2{44}  | CCn1cc(C=O)en1              | 3{13} | COc1ccc(C[N+][C-])cc1     | 10.9 | 11 |
| 1847 | 4{141,234,32} | CC(=O)NC1=CC2=NC(=C(NC3CCC3)N2C=C1)C1=NN=C2CCCCN12<br> c:18,t:4,6,8,21,23                              | Z8873684816 | 1{141} | CC(=O)Nc1ccnc(N)c1     | 2{234} | O=Cc1nnc2CCCCn12            | 3{32} | [C-][N+]C1CC1             | 10.7 | 10 |
| 1848 | 4{394,328,12} | CCC1=NNC=C1C1=C(NCC2CCOC2)N2C(C=CC(C=C)=C2F)=N1<br> c:5,8,20,24,27,t:2                                 | Z8873685500 | 1{394} | Nc1ccc(C=C)cc(F)n1     | 2{328} | Cl.CCc1n[nH]cc1C=O          | 3{12} | [C-][N+]CC1COC1           | 10.0 | 10 |
| 1849 | 4{474,66,51}  | CCN1N=C(C)C(=C1C)C1=C(NCCNC(=O)OC(C)(C)C)N2N=C(Cl)C=C(OC)C2=N1<br> c:6,10,32,t:3,24,27                 | Z8829498507 | 1{474} | COc1cc(Cl)nn1N         | 2{66}  | CCn1nc(C)c(C=O)c1C          | 3{51} | CC(C)(C)OC(=O)NCC[N+][C-] | 13.0 | 10 |
| 1850 | 4{113,810,14} | COCCNC1=C(N=C2N1C=CC=C2N1CCOCC1)C1=CN=C(NC(=O)OC(C)(C)C)S1<br> c:7,11,13,t:5,23,25                     | Z8878918584 | 1{113} | Nc1ncccc1N2CCOCC2      | 2{810} | CC(C)(C)OC(=O)Nc1ncc(C=O)s1 | 3{14} | COCC[N+][C-]              | 13.0 | 10 |
| 1851 | 4{176,529,14} | COCCNC1=C(N=C2N1C=CN=C2N1CCCC1)C1=CC(Cl)=C(C=C1)S(N)(=O)=O<br> c:7,11,13,25,27,t:5,22                  | Z8878918347 | 1{176} | Nc1ncnc1N2CCCC2        | 2{529} | NS(=O)(=O)c1ccc(C=O)c1Cl    | 3{14} | COCC[N+][C-]              | 12.3 | 10 |
| 1852 | 4{78,811,10}  | CC1=CN2N3C(C=C(C)C2=N1)=NC(=C3NC1CCOC1)C1=CC=C(C=C1)C1=CC=CC=C1<br> c:10,12,14,26,28,33,35,t:1,6,24,31 | Z8855619702 | 1{78}  | Cc1cn2nc(N)cc(C)c2n1   | 2{811} | O=Cc1ccc(cc1)c2ccccc2       | 3{10} | [C-][N+]C1CCOC1           | 11.5 | 10 |
| 1853 | 4{78,812,39}  | CCOCCNC1=C(N=C2C=C(C)C3=NC(C)=CN3N12)C1=CC2=C(O1)C=C(C=C2)C(=O)OC<br> c:16,25,29,31,t:6,8,10,13,23     | Z8855739169 | 1{78}  | Cc1cn2nc(N)cc(C)c2n1   | 2{812} | COC(=O)c1ccc2cc(C=O)oc2c1   | 3{39} | CCOCC[N+][C-]             | 11.9 | 10 |



|      |               |                                                                                           |             |        |                                |        |                                   |       |                           |      |    |
|------|---------------|-------------------------------------------------------------------------------------------|-------------|--------|--------------------------------|--------|-----------------------------------|-------|---------------------------|------|----|
| 1854 | 4{141,545,22} | COCCN1N=C(C)C(=C1C)C1=C(NC2COC2)N2C=CC(NC(C)=O)=CC2=N1<br> c:8,12,21,27,30,t:5            | Z8873684905 | 1{141} | CC(=O)Nc1ccnc(N)c1             | 2{545} | COCCn1nc(C)c(C=O)c1C              | 3{22} | [C-]<br>#[N+]C1CO<br>C1   | 10.4 | 10 |
| 1855 | 4{164,292,21} | CN(C)CC1=CC2=NC(=C(NCC3CC3)N2C=C1)C1=C(C)N=CS1<br> c:18,21,24,t:4,6,8                     | Z8878918341 | 1{164} | CN(C)Cc1ccnc(N)c1              | 2{292} | Cc1ncsc1C=O                       | 3{21} | [C-]<br>#[N+]CC1C<br>C1   | 8.9  | 10 |
| 1856 | 4{48,813,22}  | CS(=O)(=O)C1=CC2=NC(=C(NC3COC3)N2C=C1)C1=C(Cl)C(F)=CC=C1F<br> c:18,21,25,27,t:4,6,8       | Z8878918903 | 1{48}  | CS(=O)(=O)c1ccnc(N)c1          | 2{813} | Fc1ccc(F)c(C=O)c1Cl               | 3{22} | [C-]<br>#[N+]C1CO<br>C1   | 11.2 | 10 |
| 1857 | 4{188,687,62} | COC(=O)C1=CN=CC2=NC(=C(NC3(CCCC3)C(=O)OC)N12)C1=C2CSCCC2=NN1C<br> c:6,26,33,t:4,8,10      | Z8873684948 | 1{188} | COC(=O)c1cncc(N)n1             | 2{687} | Cn1nc2CCSCc2c1C=O                 | 3{62} | COC(=O)C1(CCCC1)[N+]#[C-] | 11.9 | 9  |
| 1858 | 4{43,814,39}  | CCOCCNC1=C(CCCC(=O)OC)N=C2C=CC3=C(CN(C3)C(=O)OC(C)(C)C)N12<br> c:6,17,t:15,19             | Z8873684823 | 1{43}  | CC(C)(C)OC(=O)N1Cc2ccc(N)nc2C1 | 2{814} | COC(=O)CCCC=O                     | 3{39} | CCOCC[N+]#[C-]            | 11.2 | 9  |
| 1859 | 4{112,815,12} | COC1=NC(Cl)=C(S1)C1=C(NCC2CCOC2)N2C(C=NC=C2OC)=N1<br> c:5,9,21,23,27,t:2                  | Z8846492110 | 1{112} | COc1cncc(N)n1                  | 2{815} | COc1nc(Cl)c(C=O)s1                | 3{12} | [C-]<br>#[N+]CC1C<br>COC1 | 9.9  | 9  |
| 1860 | 4{161,593,14} | COCCNC1=C(N=C2C=CC=NN12)C1=CC=C(NC(C)=O)C=C1<br> c:9,11,24,t:5,7,16,18                    | Z8854581137 | 1{161} | Nc1cccn1                       | 2{593} | CC(=O)Nc1ccc(C=O)cc1              | 3{14} | COCC[N+]#[C-]             | 8.0  | 9  |
| 1861 | 4{54,168,22}  | CN(C)C(=O)C1=CN2C(NC3COC3)=C(N=C2C=C1)C1=NOC=C1<br> c:14,16,19,25,t:5,22                  | Z8829498572 | 1{54}  | Cl.CN(C)C(=O)c1ccc(N)nc1       | 2{168} | O=Cc1ccn1                         | 3{22} | [C-]<br>#[N+]C1CO<br>C1   | 8.0  | 9  |
| 1862 | 4{146,816,46} | COC1=C(OCCCC#N)C=C(C=C1)C1=C(NCC(C)=C)N2C=C(C=CC2=N1)S(C)(=O)=O<br> c:2,10,12,15,23,25,28 | Z8878918537 | 1{146} | CS(=O)(=O)c1ccc(N)nc1          | 2{816} | COc1ccc(C=O)cc1OCCCC#N            | 3{46} | CC(=C)C[N+]#[C-]          | 11.0 | 9  |
| 1863 | 4{79,239,9}   | CNC1=C(N=C2C=NC=C(C)N12)C1=NOC2=C1CCCC2<br> c:6,17,t:2,4,8,14                             | Z8873685460 | 1{79}  | Cc1cncc(N)n1                   | 2{239} | O=Cc1noc2CCCCc12                  | 3{9}  | C[N+]#[C-]                | 6.8  | 9  |
| 1864 | 4{119,70,10}  | CC(F)(F)C1=NC(=CS1)C1=C(NC2CCOC2)N2C=C(C=CC2=N1)C#N<br> c:6,10,20,22,25,t:4               | Z8855619533 | 1{119} | Nc1ccc(C#N)nc1                 | 2{70}  | CC(F)(F)c1nc(C=O)cs1              | 3{10} | [C-]<br>#[N+]C1CC<br>OC1  | 8.4  | 8  |
| 1865 | 4{99,349,29}  | CCOC(=O)CCNC1=C(N=C2C=CC(=CN12)S(N)(=O)=O)C1C[C@H]2OC(C)(C)O[C@H]2C1<br> c:12,14,t:8,10   | Z8878918664 | 1{99}  | Nc1ccc(en1)S(=O)(=O)N          | 2{349} | CC1(C)O[C@@@H]2CC(C[C@@@H]2O1)C=O | 3{29} | CCOC(=O)C[C[N+]#[C-]      | 10.7 | 8  |

|      |               |                                                                                                          |             |        |                                  |        |                         |       |                          |      |   |
|------|---------------|----------------------------------------------------------------------------------------------------------|-------------|--------|----------------------------------|--------|-------------------------|-------|--------------------------|------|---|
| 1866 | 4{81,58,13}   | COC1=CC=C(CNC2=C(N=C3C=NC=CN23)C2=NSN=C2)C=C1  c:12,14,22,25,t:2,4,8,10,19                               | Z8829498707 | 1{81}  | Nc1cncn1                         | 2{58}  | O=Cc1cnsn1              | 3{13} | COc1ccc(C[N+]#[C-])cc1   | 7.4  | 8 |
| 1867 | 4{22,106,13}  | COC1=CC=C(CNC2=C(N=C3C=CC(CI)=NN23)C2=C(OC)N=CC=N2)C=C1  c:12,15,20,24,26,29,t:2,4,8,10                  | Z8873684759 | 1{22}  | Nc1ccc(Cl)nn1                    | 2{106} | COc1cncn1C=O            | 3{13} | COc1ccc(C[N+]#[C-])cc1   | 8.6  | 8 |
| 1868 | 4{475,212,22} | CC1=C(C=CC2=NC(=C(NC3COC3)N12)C1=NOC(=C1)C(F)F)C(F)F  c:3,21,t:1,5,7,18                                  | Z8873685492 | 1{475} | Cc1nc(N)ccc1C(F)F                | 2{212} | FC(F)c1cc(C=O)no1       | 3{22} | [C-]#[N+]C1CO<br>C1      | 8.4  | 8 |
| 1869 | 4{378,427,28} | CCCNC1=C(N=C2N1C=CC=C2OCC1=CN=C(C=C1)C1=NOC2=C1COCC2  c:6,10,12,19,21,27,t:4,17,24                       | Z8855739093 | 1{378} | Nc1cccc1OCc2ccnc2                | 2{427} | O=Cc1noc2C<br>COCc12    | 3{28} | CCC[N+]#[C-]<br>]        | 8.6  | 8 |
| 1870 | 4{83,102,31}  | CSCCNC1=C(N=C2C=CC(=CN12)P(C)(C)=O)C1=C(Br)C(C)=CC(CI)=N1  c:9,11,20,24,27,t:5,7                         | Z8878918762 | 1{83}  | CP(=O)(C)c1ccc(N)nc1             | 2{102} | Cc1cc(Cl)nc(C=O)c1Br    | 3{31} | CSCC[N+]#[C-]<br>]       | 10.3 | 8 |
| 1871 | 4{376,134,12} | COC1=NC(=NC=C1)C1=C(NCC2CCOC2)N2C=C(Cl)N=C(OC)C2=N1  c:4,6,9,28,t:2,20,23                                | Z8873685405 | 1{376} | COc1nc(Cl)cnc1N                  | 2{134} | COc1cnc(C=O)n1          | 3{12} | [C-]#[N+]CC1C<br>COC1    | 8.2  | 8 |
| 1872 | 4{50,817,18}  | CC(C)(C)NC1=C(N=C2C=CC=C(N12)P(C)(C)=O)C1=C(Br)C=CC(OC(F)F)=C1  c:9,11,20,23,29,t:5,7                    | Z8873684848 | 1{50}  | CP(=O)(C)c1cccc(N)n1             | 2{817} | FC(F)Oc1ccc(Br)c(C=O)c1 | 3{18} | CC(C)(C)[N+]#[C-]        | 10.1 | 8 |
| 1873 | 4{354,818,39} | CCOCCNC1=C(N=C2C=CC(=CN12)C(=O)OC)C1=C(F)C(F)=NC=C1  c:10,12,21,25,27,t:6,8                              | Z8855619720 | 1{354} | COC(=O)c1ccc(N)nc1               | 2{818} | Fc1cnc(C=O)c1F          | 3{39} | CCOCC[N+]#[C-]           | 7.8  | 8 |
| 1874 | 4{331,819,49} | CN(C)CCN(C)CC1=CN2C(C=C1)=NC(=C2N1)CC(F)(F)C1)C1=NN(C)C=C1Br  c:12,14,16,31,t:8,27                       | Z8878918459 | 1{331} | Cl.Cl.Cl.CN(C)CCN(C)Cc1ccc(N)nc1 | 2{819} | Cn1cc(Br)c(C=O)n1       | 3{49} | FC1(F)CC(C1)[N+]#[C-]    | 10.3 | 8 |
| 1875 | 4{73,166,20}  | COC1=CC(C)=C(NC2=C(N=C3C=CC4=NC=CN4N23)C2=NC(=CS2)C2CC2)C=C1  c:12,16,25,33,t:2,5,8,10,14,23             | Z8878918637 | 1{73}  | Nc1ccc2nccn2n1                   | 2{166} | O=Cc1nc(cs1)C2CC2       | 3{20} | COc1ccc([N+]#[C-])c(C)c1 | 8.4  | 7 |
| 1876 | 4{109,686,50} | CCNC(=O)C1=CC=C(C=C1)C1=C(NC2=CC3=C(OCCO3)C=C2)N2C(C=CC=C2S(N)(=O)=O)=N1  c:7,9,12,24,29,31,37,t:5,15,17 | Z8873684650 | 1{109} | Cl.Nc1cccc(n1)S(=O)(=O)N         | 2{686} | CCNC(=O)c1ccc(C=O)cc1   | 3{50} | [C-]#[N+]c1ccc2OCCOc2c1  | 9.4  | 7 |
| 1877 | 4{79,262,9}   | CCC1=NN(C)C(=C1Cl)C1=C(NC)N2C(C=NC=C2)=N1  c:6,10,16,18,21,t:2                                           | Z8837933139 | 1{79}  | Cc1cnc(N)n1                      | 2{262} | CCc1nn(C)c(C=O)c1Cl     | 3{9}  | C[N+]#[C-]               | 5.8  | 7 |

|      |               |                                                                                                  |             |        |                          |        |                          |       |                                  |     |   |
|------|---------------|--------------------------------------------------------------------------------------------------|-------------|--------|--------------------------|--------|--------------------------|-------|----------------------------------|-----|---|
| 1878 | 4{400,820,22} | CCN(CC)CCC1=NC(=CS1)C1=C(NC2COC2)N2C=C(COC(C)C)C=CC2=N1<br> c:9,13,29,32,t:7,22                  | Z8878918616 | 1{400} | CC(C)OCc1ccc(N)nc1       | 2{820} | CCN(CC)CCc1nc(C=O)cs1    | 3{22} | [C-]<br>#[N+]C1CO<br>C1          | 7.9 | 7 |
| 1879 | 4{87,821,23}  | COC(=O)CCC(NC1=C(N=C2C=C(C)C(Cl)=CN12)C1=CN=C(N=C1)C1CC1)C(=O)OC<br> c:16,23,25,t:8,10,12,21     | Z8873684681 | 1{87}  | Cc1cc(N)nc1Cl            | 2{821} | O=Cc1cnc(nc1)C2CC2       | 3{23} | COC(=O)CC<br>C([N+]#[C-])C(=O)OC | 8.5 | 7 |
| 1880 | 4{161,137,20} | COC1=CC(C)=C(NC2=C(N=C3C=CC=NN23)C2=C(C)ON=C2C)C=C1<br> c:12,14,19,23,27,t:2,5,8,10              | Z8878918648 | 1{161} | Ne1cccnn1                | 2{137} | Cc1noc(C)c1C=O           | 3{20} | COc1ccc([N+]#[C-])c(C)c1         | 6.3 | 7 |
| 1881 | 4{389,822,23} | COC(=O)CCC(NC1=C(N=C2N1C=C(C)C=C2C)C1=NN(CC(F)(F)F)N=C1)C(=O)OC<br> c:10,17,29,t:8,14,21         | Z8878918365 | 1{389} | Cc1cnc(N)c(C)c1          | 2{822} | FC(F)(F)Cn1ncc(C=O)n1    | 3{23} | COC(=O)CC<br>C([N+]#[C-])C(=O)OC | 8.1 | 6 |
| 1882 | 4{85,823,35}  | CSCCCNC1=C(N=C2C=C(C=C(C)N12)C#N)C1=NN(C)C2=C1C=CC=N2<br> c:10,24,27,29,t:6,8,12,20              | Z8873684904 | 1{85}  | Cc1cc(C#N)cc(N)n1        | 2{823} | Cn1nc(C=O)c2cccnc12      | 3{35} | CSCCC[N+]#[C-]                   | 6.7 | 6 |
| 1883 | 4{375,242,21} | CC(C)OC1=CN=CC2=NC(=C(NCC3CC3)N12)C1=CN2N=CC(C#N)=C2N=C1<br> c:6,24,28,31,t:4,8,10,21            | Z8873684892 | 1{375} | CC(C)Oe1cnc(N)n1         | 2{242} | O=Cc1cnc2c(C#N)enn2c1    | 3{21} | [C-]<br>#[N+]CC1C<br>C1          | 6.6 | 6 |
| 1884 | 4{161,824,6}  | CCOC(=O)CCCN1=C(N=C2C=CC=NN12)C1=NC(Br)=CC=C1  c:13,15,23,25,t:9,11,20                           | Z8873684923 | 1{161} | Ne1cccnn1                | 2{824} | Br1c1ccc(C=O)n1          | 3{6}  | CCOC(=O)C<br>CC[N+]#[C-]         | 6.8 | 6 |
| 1885 | 4{146,104,46} | CC(=C)CNC1=C(N=C2C=CC(=CN12)S(C)(=O)=O)C1=NC(C)=CO1  c:9,11,23,t:5,7,20                          | Z8873684784 | 1{146} | CS(=O)(=O)c1ccc(N)nc1    | 2{104} | Cc1coc(C=O)n1            | 3{46} | CC(=C)C[N+]#[C-]                 | 5.8 | 6 |
| 1886 | 4{50,825,18}  | CC(C)C1=NC=C(N1C)C1=C(NC(C)(C)C)N2C(C=CC=C2P(C)(C)=O)=N1<br> c:5,10,19,21,27,t:3                 | Z8878918793 | 1{50}  | CP(=O)(C)c1ccc(N)n1      | 2{825} | CC(C)c1ncc(C=O)n1C       | 3{18} | CC(C)(C)[N+]#[C-]                | 6.4 | 6 |
| 1887 | 4{46,274,9}   | CNC1=C(CC2(CCOCC2)C#N)N=C2C=CC=C N12  c:2,16,18,t:14                                             | Z8878918469 | 1{46}  | Ne1cccnn1                | 2{274} | O=CCC1(CC OCC1)C#N       | 3{9}  | C[N+]#[C-]                       | 4.5 | 6 |
| 1888 | 4{395,101,7}  | CC1=CC(=NN2C(NC3CCOCC3)=C(N=C12)C1=C(CO)C=CS1)C(F)(F)F  c:3,14,20,24,t:1,16                      | Z8878918535 | 1{395} | Cc1cc(mnc1N)C(F)(F)F     | 2{101} | OCc1ccc1C=O              | 3{7}  | [C-]<br>#[N+]C1CC<br>OCC1        | 6.6 | 6 |
| 1889 | 4{79,826,9}   | CNC1=C(N=C2C=NC=C(C)N12)C1=NC(Cl)=CS1  c:6,17,t:2,4,8,14                                         | Z8878918870 | 1{79}  | Cc1cnc(N)n1              | 2{826} | Clc1csc(C=O)n1           | 3{9}  | C[N+]#[C-]                       | 4.5 | 6 |
| 1890 | 4{54,827,37}  | CCN(CCO)C1=CC(C)=C(C=C1)C1=C(NC2C(C(C2)C(=O)OC)N2C=C(C=CC2=N1)C(=O)N(C)C  c:9,11,14,27,29,32,t:6 | Z8854581161 | 1{54}  | Cl.CN(C)C(=O)c1ccc(N)nc1 | 2{827} | CCN(CCO)c1ccc(C=O)c(C)c1 | 3{37} | COC(=O)C1<br>CC(C1)[N+]#[C-]     | 7.8 | 6 |

|      |               |                                                                                                            |             |        |                                 |        |                                       |       |                             |     |   |
|------|---------------|------------------------------------------------------------------------------------------------------------|-------------|--------|---------------------------------|--------|---------------------------------------|-------|-----------------------------|-----|---|
| 1891 | 4{91,828,26}  | CC(N1C(=O)C2=C(C=CC=C2)C1=O)C1=C(NCC2=CC=C(F)C=C2)N2C=C(C=CC2=N1)C(N)=O  c:7,9,15,24,28,30,33,t:5,19,21    | Z8878918519 | 1{91}  | NC(=O)c1ccc(N)nc1               | 2{828} | CC(C=O)N1C(=O)c2cccc2C1=O             | 3{26} | Fc1ccc(C[N+][C-])cc1        | 7.2 | 6 |
| 1892 | 4{73,307,20}  | COC1=CC(C)=C(NC2=C(N=C3C=CC4=NC=CN4N23)C2=CN=C(Cl)N2C)C=C1  c:12,16,31,t:2,5,8,10,14,23,25                 | Z8855739267 | 1{73}  | Nc1ccc2nccn2n1                  | 2{307} | Cn1c(Cl)ncc1C=O                       | 3{20} | COc1ccc([N+][C-])c(C)c1     | 6.0 | 5 |
| 1893 | 4{73,829,20}  | COC1=CC(C)=C(NC2=C(N=C3C=CC4=NC=CN4N23)C2=CC(Cl)=C(OC)N=C2)C=C1  c:12,16,30,33,t:2,5,8,10,14,23,26         | Z8878918518 | 1{73}  | Nc1ccc2nccn2n1                  | 2{829} | COc1ncc(C=O)cc1Cl                     | 3{20} | COc1ccc([N+][C-])c(C)c1     | 6.4 | 5 |
| 1894 | 4{331,741,49} | CN(C)CCN(C)CC1=CN2C(C=C1)=NC(=C2N1)CC(F)(F)C1)C1=CC=C(C=C1)N1C=NC=N1  c:12,14,16,29,31,35,37,t:8,27        | Z8873684908 | 1{331} | Cl.C1.C1.CN(C)CCN(C)C1ccc(N)nc1 | 2{741} | O=Cc1ccc(cc1)n2cncn2                  | 3{49} | FC1(F)CC(C1)[N+][C-]        | 7.0 | 5 |
| 1895 | 4{141,209,32} | CC(=O)NC1=CC2=NC(=C(NC3CCC3)N2C=C1)C1=NN=C2CCCCN12  c:18,t:4,6,8,21,23                                     | Z8873684831 | 1{141} | CC(=O)Nc1ccnc(N)c1              | 2{209} | O=Cc1nnc2CCCCn12                      | 3{32} | [C-][N+]C1CC1               | 5.3 | 5 |
| 1896 | 4{99,241,34}  | CN1N=CC(Br)=C1C1=C(NCC2CCCO2)N2C=C(C=CC2=N1)S(N)(=O)=O  c:2,5,8,19,21,24                                   | Z8829498789 | 1{99}  | Nc1ccc(en1)S(=O)(=O)N           | 2{241} | Cn1ncc(Br)c1C=O                       | 3{34} | [C-][N+]CC1CCCCO1           | 6.2 | 5 |
| 1897 | 4{137,94,13}  | COC1=CC=C(CNC2=C(N=C3C=CC(C)=NN23)C2=NC=CN=C2)C=C1  c:12,15,22,24,27,t:2,4,8,10,20                         | Z8873685365 | 1{137} | Cc1ccc(N)nn1                    | 2{94}  | O=Cc1cncn1                            | 3{13} | COc1ccc(C[N+][C-])cc1       | 4.5 | 5 |
| 1898 | 4{73,307,13}  | COC1=CC=C(CNC2=C(N=C3C=CC4=NC=CN4N23)C2=CN=C(Cl)N2C)C=C1  c:12,16,31,t:2,4,8,10,14,23,25                   | Z8837933161 | 1{73}  | Nc1ccc2nccn2n1                  | 2{307} | Cn1c(Cl)ncc1C=O                       | 3{13} | COc1ccc(C[N+][C-])cc1       | 4.7 | 4 |
| 1899 | 4{22,170,9}   | CCN1N=NC(=N1)C1=C(NC)N2N=C(Cl)C=C2=N1  c:3,5,8,16,19,t:13                                                  | Z8846491739 | 1{22}  | Nc1ccc(Cl)nn1                   | 2{170} | CCn1nnc(C=O)n1                        | 3{9}  | C[N+][C-]                   | 3.1 | 4 |
| 1900 | 4{81,170,9}   | CCN1N=NC(=N1)C1=C(NC)N2C=CN=CC2=N1  c:3,5,8,13,15,18                                                       | Z8855739229 | 1{81}  | Nc1cncn1                        | 2{170} | CCn1nnc(C=O)n1                        | 3{9}  | C[N+][C-]                   | 2.7 | 4 |
| 1901 | 4{389,572,23} | COC(=O)CCC(NC1=C(N=C2N1C=C(C)C=C2)C)C1=NC(=CC(OC)=C1)C(=O)OC)C(=O)OC  c:10,17,23,27,t:8,14,21              | Z8878918405 | 1{389} | Cc1cnc(N)c(C)c1                 | 2{572} | COC(=O)c1cc(OC)cc(C=O)n1              | 3{23} | COC(=O)CC(C[N+][C-])C(=O)OC | 5.3 | 4 |
| 1902 | 4{476,279,47} | CC(C)NC1=C(N=C2C=CC=C(CC3=NC=CC=C3)N12)[C@@H]1CCCO[C@H]1C1=NC=CN1C  &1:20,25,r,c:8,15,17,32,t:4,6,10,13,30 | Z8873685372 | 1{476} | Nc1cccc(Cc2ccccn2)n1            | 2{279} | Cn1cnc1[C@@H]2OCC[C@H]2C=O  &1:6,11,r | 3{47} | CC(C)[N+][C-]               | 4.7 | 4 |

|      |               |                                                                                            |             |        |                            |        |                                    |       |                                        |     |   |
|------|---------------|--------------------------------------------------------------------------------------------|-------------|--------|----------------------------|--------|------------------------------------|-------|----------------------------------------|-----|---|
| 1903 | 4{187,427,46} | CC(=C)CNC1=C(N=C2C=C(C#N)C(Cl)=CN12)C1=NOC2=C1COCC2  c:14,22,t:5,7,9,19                    | Z8873684945 | 1{187} | Nc1cc(C#N)c(Cl)cn1         | 2{427} | O=Cc1noc2COCc12                    | 3{46} | CC(=C)C[N+]#[C-]                       | 3.9 | 4 |
| 1904 | 4{161,116,13} | COC1=CC=C(CNC2=C(N=C3C=CC=NN23)C2=CN(CCC=C)N=N2)C=C1  c:12,14,26,29,t:2,4,8,10,19          | Z8837933164 | 1{161} | Nc1cccn1                   | 2{116} | C=CCcn1cc(C=O)nn1                  | 3{13} | COc1ccc(C[N+]#[C-])cc1                 | 3.7 | 4 |
| 1905 | 4{380,830,5}  | COCCNC1=C(N=C2N1C=C(Cl)N=C2C)C1=NC(=CC=C1)C(=O)OC  c:8,15,21,23,t:6,12,19                  | Z8878918321 | 1{380} | Cc1nc(Cl)cn1N              | 2{830} | COC(=O)c1ccc(C=O)n1                | 3{5}  | COCCC[N+]#[C-]                         | 3.4 | 3 |
| 1906 | 4{78,85,74}   | CC1=CN2N3C(NC4CCCN(C4)C(=O)OC(C)(C)C)=C(N=C3C=C(C)C2=N1)C1=CN=NS1  c:20,22,29,34,t:1,25,32 | Z8873684642 | 1{78}  | Cc1cn2nc(N)cc(C)c2n1       | 2{85}  | O=Cc1cnns1                         | 3{74} | CC(C)(C)OC(=O)N1CCCC[C@H](C1)[N+]#[C-] | 4.0 | 3 |
| 1907 | 4{477,235,23} | COC(=O)CCC(NC1=C(N=C2C=C(F)C(Br)=CN12)C1=CSC(=C1)C#N)C(=O)OC  c:16,24,t:8,10,12,21         | Z8878918562 | 1{477} | Nc1cc(F)c(Br)cn1           | 2{235} | O=Cc1csc(C#N)c1                    | 3{23} | COC(=O)CC(C[N+]#[C-])C(=O)OC           | 4.0 | 3 |
| 1908 | 4{79,485,9}   | CNC1=C(N=C2C=NC=C(C)N12)C1=NOC2=C1CCC2  c:6,17,t:2,4,8,14                                  | Z8873685257 | 1{79}  | Cc1cncc(N)n1               | 2{485} | O=Cc1noc2C CCc12                   | 3{9}  | C[N+]#[C-]                             | 2.0 | 3 |
| 1909 | 4{73,137,20}  | COC1=CC(C)=C(NC2=C(N=C3C=CC4=NC=CN4N23)C2=C(C)ON=C2C)C=C1  c:12,16,23,27,31,t:2,5,8,10,14  | Z8878918340 | 1{73}  | Nc1ccc2nccn2n1             | 2{137} | Cc1noc(C)c1C=O                     | 3{20} | COc1ccc([N+]#[C-])c(C)c1               | 2.8 | 3 |
| 1910 | 4{87,235,23}  | COC(=O)CCC(NC1=C(N=C2C=C(C)C(Cl)=CN12)C1=CSC(=C1)C#N)C(=O)OC  c:16,24,t:8,10,12,21         | Z8873685450 | 1{87}  | Cc1cc(N)nc1Cl              | 2{235} | O=Cc1csc(C#N)c1                    | 3{23} | COC(=O)CC(C[N+]#[C-])C(=O)OC           | 3.2 | 3 |
| 1911 | 4{164,831,10} | CN(C)CC1=CC2=NC(C3=CN=C(S3)C3CN(C3)C(=O)OC(C)(C)C)=C(NC3CCOC3)N2C=C1  c:11,37,t:4,6,9,26   | Z8878918533 | 1{164} | CN(C)Cc1cnc(N)c1           | 2{831} | CC(C)(C)OC(=O)N1CC(C1)c2ncc(C=O)s2 | 3{10} | [C-]#[N+]C1CCOC1                       | 3.4 | 3 |
| 1912 | 4{209,260,14} | COCCNC1=C(N=C2N1C=CC=C2N1CCCCC1)C1=NOC(C)=C1  c:7,11,13,27,t:5,23                          | Z8878918510 | 1{209} | Nc1ncccc1N2CCCCC2          | 2{260} | Cc1cc(C=O)no1                      | 3{14} | COCC[N+]#[C-]                          | 2.4 | 2 |
| 1913 | 4{369,101,7}  | OCC1=C(SC=C1)C1=C(NC2CCOCC2)N2C=C(C=CC2=N1)C(F)C(F)(F)F  c:5,8,19,21,24,t:2                | Z8873684604 | 1{369} | Cl.Nc1ccc(cn1)C(F)C(F)(F)F | 2{101} | OCc1ccsc1C=O                       | 3{7}  | [C-]#[N+]C1CCOCC1                      | 2.8 | 2 |
| 1914 | 4{141,832,22} | CC1OC2=C(NC1=O)C=C(C=C2)C1=C(NC2COC2)N2C=CC(NC(C)=O)=CC2=N1  c:3,9,11,14,23,29,32          | Z8878918783 | 1{141} | CC(=O)Nc1ccnc(N)c1         | 2{832} | CC1Oe2ccc(C=O)cc2NC1=O             | 3{22} | [C-]#[N+]C1CO C1                       | 2.8 | 2 |

|      |               |                                                                                                     |             |        |                       |        |                                   |       |                                  |     |   |
|------|---------------|-----------------------------------------------------------------------------------------------------|-------------|--------|-----------------------|--------|-----------------------------------|-------|----------------------------------|-----|---|
| 1915 | 4{61,756,23}  | CCC1=CC=CC2=NC(C3=CC(=CO3)S(C)(=O)=O)=C(NC(CCC(=O)OC)C(=O)OC)N12<br> c:4,11,t:2,6,9,18              | Z8873685377 | 1{61}  | CCc1cccc(N)n1         | 2{756} | CS(=O)(=O)c1coc(C=O)c1            | 3{23} | COC(=O)CC<br>C([N+]#[C-])C(=O)OC | 2.8 | 2 |
| 1916 | 4{478,769,21} | CN1N=CN=C1C1=C(NCC2CC2)N2C(C=C(Br)C=C2C)=N1  c:2,4,7,20,23,t:17                                     | Z8873684620 | 1{478} | Cc1cc(Br)cc(N)n1      | 2{769} | Cn1ncnc1C=O                       | 3{21} | [C-]<br>#[N+]CC1C<br>C1          | 2.0 | 2 |
| 1917 | 4{479,408,47} | CC(C)NC1=C(CCN2CCOC2=O)N=C2C=CC(CI)=C(Br)N12  c:4,17,t:15,20                                        | Z8878918400 | 1{479} | Nc1ccc(Cl)c(Br)n1     | 2{408} | O=CCCN1C<br>COC1=O                | 3{47} | CC(C)[N+]#[C-]                   | 1.8 | 2 |
| 1918 | 4{113,260,6}  | CCOC(=O)CCCN1=C(N=C2N1C=CC=C2N1CCOCC1)C1=NOC(C)=C1<br> c:11,15,17,31,t:9,27                         | Z8873685448 | 1{113} | Nc1ncccc1<br>N2CCOCC2 | 2{260} | Cc1cc(C=O)<br>no1                 | 3{6}  | CCOC(=O)C<br>CC[N+]#[C-]         | 1.8 | 2 |
| 1919 | 4{395,439,7}  | COC1=C(C=CC(=C1)C1=C(NC2CCOCC2)N2N=C(C=C(C)C2=N1)C(F)(F)F)S(C)(=O)=O<br> c:4,6,9,20,26,t:2,22       | Z8878918392 | 1{395} | Cc1cc(nnc1N)C(F)(F)F  | 2{439} | COc1cc(C=O)<br>)ccc1S(=O)(=O)C    | 3{7}  | [C-]<br>#[N+]C1CC<br>OCC1        | 2.0 | 2 |
| 1920 | 4{187,413,12} | C1C1=CN2C(NCC3CCOC3)=C(N=C2C=C1C#N)C1=CN=C(S1)C1=CC=NC=C1<br> c:12,14,17,24,30,32,t:1,22,28         | Z8878918513 | 1{187} | Nc1cc(C#N)c(Cl)cn1    | 2{413} | O=Cc1nc(s1)c2ccncc2               | 3{12} | [C-]<br>#[N+]CC1C<br>COC1        | 1.6 | 1 |
| 1921 | 4{327,833,34} | COC(=O)C1=C(F)C2=NC(C3=CC=C(S3)C#N)=C(NCC3CCCO3)N2C=C1<br> c:4,12,29,t:7,10,17                      | Z8878918899 | 1{327} | COC(=O)c1ccnc(N)c1F   | 2{833} | O=Cc1ccc(C#N)s1                   | 3{34} | [C-]<br>#[N+]CC1C<br>CCO1        | 0.0 | 0 |
| 1922 | 4{480,168,22} | CC1=C(C)C(CI)=NN2C(NC3COC3)=C(N=C12)C1=NOC=C1  c:1,5,14,23,t:16,20                                  | Z8878918862 | 1{480} | Cc1c(C)c(Cl)nnc1N     | 2{168} | O=Cc1ccon1                        | 3{22} | [C-]<br>#[N+]C1CO<br>C1          | 0.0 | 0 |
| 1923 | 4{91,472,18}  | COC(=O)C1=CC2=C(C=NN2C=C1)C1=C(NC(C)(C)C)N2C=C(C=CC2=N1)C(N)=O<br> c:8,12,15,23,25,28,t:4,6         | Z8878918837 | 1{91}  | NC(=O)c1ccc(N)nc1     | 2{472} | COC(=O)c1c<br>cn2ncc(C=O)<br>c2c1 | 3{18} | CC(C)(C)[N+]#[C-]                | 0.0 | 0 |
| 1924 | 4{421,488,37} | COC(=O)C1CC(C1)NC1=C(N=C2C=CC(C(=O)OC)=C(CI)N12)C1=CC2=C(NC(=O)CC2)N=C1  c:14,36,t:10,12,20,26,28   | Z8878918610 | 1{421} | COC(=O)c1ccc(N)nc1C1  | 2{488} | O=Cc1cnc2N<br>C(=O)CCc2c1         | 3{37} | COC(=O)C1<br>CC(C1)[N+]#[C-]     | 0.0 | 0 |
| 1925 | 4{218,649,10} | CN1N=C(C=C1C1=C(NC2CCOC2)N2N=C(C=CC2=N1)C(C)(C)C)C(F)F  c:2,4,7,17,19,22                            | Z8878918586 | 1{218} | CC(C)(C)c1ccc(N)mn1   | 2{649} | Cn1nc(cc1C=O)C(F)F                | 3{10} | [C-]<br>#[N+]C1CC<br>OC1         | 0.0 | 0 |
| 1926 | 4{94,21,60}   | COC(=O)C1=CC(NC2=C(N=C3C=CC(F)=NN23)C2=CC3=NC=NN3C=C2)=CC=C1<br> c:12,15,24,28,30,32,t:4,8,10,20,22 | Z8878918540 | 1{94}  | Nc1ccc(F)nn1          | 2{21}  | O=Cc1ccn2n<br>cnc2c1              | 3{60} | COC(=O)c1c<br>ccc([N+]#[C-])c1   | 0.0 | 0 |
| 1927 | 4{123,289,22} | COC1=C(OCC#C)C=C(C=C1)C1=C(NC2COC2)N2C=CC(OCCO)=CC2=N1<br> c:2,8,10,13,22,28,31                     | Z8878918484 | 1{123} | Cl.Nc1cc(OCCO)ccn1    | 2{289} | COc1ccc(C=O)cc1OCC#C              | 3{22} | [C-]<br>#[N+]C1CO<br>C1          | 0.0 | 0 |

|      |               |                                                                                                        |             |        |                          |        |                               |       |                              |     |   |
|------|---------------|--------------------------------------------------------------------------------------------------------|-------------|--------|--------------------------|--------|-------------------------------|-------|------------------------------|-----|---|
| 1928 | 4{457,119,22} | CCOC(=O)C1=NN=C(N1)C1=C(NC2COC2)N2C=C(Br)C(=CC2=N1)C(F)F<br> c:7,11,23,26,t:5,20                       | Z8878918474 | 1{457} | Nc1cc(C(F)F)c(Br)cn1     | 2{119} | CCOC(=O)c1nnc(C=O)[nH]1       | 3{22} | [C-]<br>#[N+]C1CO<br>C1      | 0.0 | 0 |
| 1929 | 4{267,834,5}  | COCCNC1=C(CC2CCC(C)(C)O2)N=C2C=C<br>C=C(C#C)N12  c:6,19,t:17,21                                        | Z8878918458 | 1{267} | Nc1cccc(C#C)n1           | 2{834} | CC1(C)CCC(C=O)O1              | 3{5}  | COCC[N+]<br>#[C-]            | 0.0 | 0 |
| 1930 | 4{185,799,69} | COC1=C(NC2=C(N=C3C=CC(=C(C)N23)S(C)(=O)=O)C2=NN=C(C)C=C2)C=CC=C1<br> c:2,9,26,29,31,t:5,7,11,21,23     | Z8878918417 | 1{185} | Cc1nc(N)ccc1S(=O)(=O)C   | 2{799} | Cc1ccc(C=O)nn1                | 3{69} | COc1cccc1[<br>N+]#[C-]       | 0.0 | 0 |
| 1931 | 4{267,383,5}  | COCCNC1=C(N=C2C=CC=C(C#C)N12)C1=NC=C(C)C=C1  c:10,24,t:6,8,12,19,21                                    | Z8878918371 | 1{267} | Nc1cccc(C#C)n1           | 2{383} | Cc1ccc(C=O)nc1                | 3{5}  | COCC[N+]<br>#[C-]            | 0.0 | 0 |
| 1932 | 4{47,179,6}   | CCOC(=O)CCNC1=C(N=C2C=C(C=CN12)S(N)(=O)=O)C1=CC=C(OC2CCOC2)C=C1<br> c:13,15,35,t:9,11,24,26            | Z8873684752 | 1{47}  | Cl.Nc1cc(ccn1)S(=O)(=O)N | 2{179} | O=Cc1ccc(O<br>C2CCOC2)c<br>c1 | 3{6}  | CCOC(=O)C<br>CC[N+]#[C-]     | 0.0 | 0 |
| 1933 | 4{28,189,26}  | FC1=CC=C(CNC2=C(N=C3C=C(C=CN23)C2=NOC=N2)C2=CN(N=N2)C2CCOCC2)C=C1<br> c:11,13,21,27,37,t:1,3,7,9,18,24 | Z8873685403 | 1{28}  | Cl.Nc1cc(ccn1)c2ncon2    | 2{189} | O=Cc1cn(nn1)C2CCOCC2          | 3{26} | Fc1ccc(C[N+]<br>#[C-])cc1    | 0.0 | 0 |
| 1934 | 4{42,835,14}  | COCCNC1=C(N=C2C=CC(SC)=CN12)C1=CS<br>C(=N1)N(C(C)=O)C1=CC=CC=C1<br> c:9,13,21,30,32,t:5,7,18,28        | Z8873685375 | 1{42}  | CSc1ccc(N)nc1            | 2{835} | CC(=O)N(c1nc(C=O)cs1)c2cccc2  | 3{14} | COCC[N+]#[<br>C-]            | 0.0 | 0 |
| 1935 | 4{172,403,29} | CCOC(=O)CCNC1=C(N=C2N1C=CC1=C2CCO1)C1=CN=C(C1)N1  c:10,14,16,t:8,23,25                                 | Z8873684921 | 1{172} | Nc1nccc2OCCc21           | 2{403} | Clc1ncc(C=O)[nH]1             | 3{29} | CCOC(=O)C<br>C[N+]#[C-]      | 0.0 | 0 |
| 1936 | 4{38,170,9}   | CCN1N=NC(=N1)C1=C(NC)N2C=CC(=CC2=N1)C#N  c:3,5,8,13,15,18                                              | Z8873684882 | 1{38}  | Nc1cc(C#N)ccn1           | 2{170} | CCn1nnc(C=O)n1                | 3{9}  | C[N+]#[C-]                   | 0.0 | 0 |
| 1937 | 4{184,28,26}  | NC(=S)C1=CN2C(NCC3=CC=C(F)C=C3)=C(N=C2C=C1)C1=CN(N=C1)C1CCS(=O)(=O)C1<br> c:14,16,18,21,27,t:3,9,11,24 | Z8873684871 | 1{184} | NC(=S)c1ccc(N)nc1        | 2{28}  | O=Cc1cnn(c1)C2CCS(=O)(=O)C2   | 3{26} | Fc1ccc(C[N+]<br>#[C-])cc1    | 0.0 | 0 |
| 1938 | 4{28,439,18}  | COC1=C(C=CC(=C1)C1=C(NC(C)(C)C)N2C=CC(=CC2=N1)C1=NOC=N1)S(C)(=O)=O<br> c:4,6,9,17,19,22,28,t:2,25      | Z8873684857 | 1{28}  | Cl.Nc1cc(ccn1)c2ncon2    | 2{439} | COc1cc(C=O)ccc1S(=O)(=O)C     | 3{18} | CC(C)(C)[N+]<br>#[C-]        | 0.0 | 0 |
| 1939 | 4{73,98,20}   | COC1=CC(C)=C(NC2=C(N=C3C=CC4=NC=CN4N23)C2=NC=C(OC)N=C2)C=C1<br> c:12,16,29,32,t:2,5,8,10,14,23,25      | Z8873684847 | 1{73}  | Nc1ccc2nccn2n1           | 2{98}  | COc1cnc(C=O)cn1               | 3{20} | COc1ccc([N+]<br>#[C-])c(C)c1 | 0.0 | 0 |
| 1940 | 4{209,377,14} | COCCNC1=C(N=C2N1C=CC=C2N1CCCC1)C1=NN=C1C  c:7,11,13,26,t:5,23                                          | Z8873684812 | 1{209} | Nc1ncccc1N2CCCC2         | 2{377} | Cl.Cc1c[nH]nc1C=O             | 3{14} | COCC[N+]#[<br>C-]            | 0.0 | 0 |

|      |               |                                                                                                   |             |        |                       |        |                                     |       |                                        |     |   |
|------|---------------|---------------------------------------------------------------------------------------------------|-------------|--------|-----------------------|--------|-------------------------------------|-------|----------------------------------------|-----|---|
| 1941 | 4{101,62,6}   | CCOC(=O)CCNC1=C(N=C2N1C=C(CO)C=C2C1)C1CC1CCOCC1  c:11,19,t:9,15                                   | Z8829498700 | 1{101} | Ne1ncc(CO)cc1Cl       | 2{62}  | O=CC1CC21CCOCC2                     | 3{6}  | CCOC(=O)C CC[N+]#[C-]                  | 0.0 | 0 |
| 1942 | 4{111,119,15} | CCNC1=C(N=C2N1C=C(C=C2C)C(=O)OC)C1=NN=C(N1)C(=O)OCC  c:5,9,11,21,t:3,19                           | Z8878918878 | 1{111} | COC(=O)c1cnc(N)c(C)c1 | 2{119} | CCOC(=O)c1nnc(C=O)[nH]1             | 3{15} | CC[N+]#[C-]                            | 0.0 | 0 |
| 1943 | 4{225,588,60} | COC(=O)C1=CC(NC2=C(N=C3C=C(C1)C=N23)C2=CN(C)N=C2C)=CC=C1  c:15,24,27,29,t:4,8,10,12,20            | Z8878918841 | 1{225} | Ne1cc(Cl)cnm1         | 2{588} | Cc1nm(C)cc1C=O                      | 3{60} | COC(=O)c1cccc([N+]#[C-])c1             | 0.0 | 0 |
| 1944 | 4{146,766,51} | CC1CC1C1=C(NCCNC(=O)OC(C)(C)C)N2C=C(C=CC2=N1)S(C)(=O)O  c:5,19,21,24                              | Z8878918806 | 1{146} | CS(=O)(=O)c1ccc(N)nc1 | 2{766} | CC1CC1C=O                           | 3{51} | CC(C)(C)OC(=O)NCC[N+]#[C-]             | 0.0 | 0 |
| 1945 | 4{292,212,35} | CCOC1=CN=CC2=NC(=C(NCCCSC)N12)C1=NOC(=C1)C(F)F  c:5,23,t:3,7,9,20                                 | Z8878918799 | 1{292} | CCOc1cncc(N)n1        | 2{212} | FC(F)c1cc(C=O)no1                   | 3{35} | CSCCC[N+]#[C-]                         | 0.0 | 0 |
| 1946 | 4{301,735,22} | COC(=O)C1=CN=C(S1)C1=C(NC2COC2)N2C=C(Cl)C=C(F)C2=N1  c:6,10,26,t:4,19,22                          | Z8878918778 | 1{301} | Ne1ncc(Cl)cc1F        | 2{735} | COC(=O)c1cnc(C=O)s1                 | 3{22} | [C-]#[N+]C1CO C1                       | 0.0 | 0 |
| 1947 | 4{73,558,20}  | COC1=CC(C)=C(NC2=C(N=C3C=CC4=NC=CN4N23)C2=CC(Cl)=NC(C)=C2)C=C1  c:12,16,26,29,32,t:2,5,8,10,14,23 | Z8878918591 | 1{73}  | Ne1ccc2nccn2n1        | 2{558} | Cc1cc(C=O)cc(Cl)n1                  | 3{20} | COc1ccc([N+]#[C-])c(C)c1               | 0.0 | 0 |
| 1948 | 4{394,395,10} | CC(C)(C)OC(=O)N[C@H]1C[C@@H](C1)C1=C(NC2CCOC2)N2C(C=CC(C=C)=C2F)=N1  r,c:13,24,28,31              | Z8878918567 | 1{394} | Ne1ccc(C=C)c(F)n1     | 2{395} | CC(C)(C)OC(=O)N[C@H]1C[C@@H](C1)C=O | 3{10} | [C-]#[N+]C1CCOC1                       | 0.0 | 0 |
| 1949 | 4{399,216,15} | CCNC1=C(N=C2C=CC(OC(C)C)=NN12)C1=CN=C(S1)C(=O)OC  c:7,13,20,t:3,5,18                              | Z8878918443 | 1{399} | CC(C)Oc1ccc(N)nm1     | 2{216} | COC(=O)c1ncc(C=O)s1                 | 3{15} | CC[N+]#[C-]                            | 0.0 | 0 |
| 1950 | 4{150,212,32} | FC(F)C1=CC(=NO1)C1=C(NC2CCC2)N2C=C(C(=CC2=N1)C1CCOC1  c:5,9,18,20,23,t:3                          | Z8878918415 | 1{150} | Ne1cc(cen1)C2CCOC2    | 2{212} | FC(F)c1cc(C=O)no1                   | 3{32} | [C-]#[N+]C1CC C1                       | 0.0 | 0 |
| 1951 | 4{78,134,77}  | COC1=NC(=NC=C1)C1=C(NC2CCCN(C2)C(=O)OC(C)(C)C)N2N3C=C(C)N=C3C(C)=CC2=N1  c:4,6,9,31,35,38,t:2,28  | Z8878918312 | 1{78}  | Cc1en2nc(N)cc(C)c2n1  | 2{134} | COc1ccnc(C=O)n1                     | 3{77} | CC(C)(C)OC(=O)N1CCC[C@@H](C1)[N+]#[C-] | 0.0 | 0 |
| 1952 | 4{78,836,28}  | CCCNC1=C(N=C2C=C(C)C3=NC(C)=CN3N12)C1=C(Cl)NN=C1CC  c:14,21,25,t:4,6,8,11                         | Z8873684738 | 1{78}  | Cc1en2nc(N)cc(C)c2n1  | 2{836} | CCc1n[nH]c(Cl)c1C=O                 | 3{28} | CCC[N+]#[C-]                           | 0.0 | 0 |



|      |               |                                                                                                         |             |        |                                    |        |                                    |       |                            |     |   |
|------|---------------|---------------------------------------------------------------------------------------------------------|-------------|--------|------------------------------------|--------|------------------------------------|-------|----------------------------|-----|---|
| 1953 | 4{59,837,49}  | CC(C)(C)OC(=O)N1C=NC(=C1)C1=C(NC2C<br>C(F)(F)C2)N2C=C(CN3CCOCC3)C=CC2=N1<br> c:8,10,13,34,37,t:24       | Z8873684673 | 1{59}  | Nc1ccc(CN<br>2CCOCC2)<br>cn1       | 2{837} | CC(C)(C)OC<br>(=O)n1cnc(C<br>=O)c1 | 3{49} | FC1(F)CC(C<br>1)[N+]#[C-]  | 0.0 | 0 |
| 1954 | 4{73,838,13}  | COC1=CC=C(CNC2=C(N=C3C=CC4=NC=C<br>N4N23)C2=CN=C(N=C2)C(C)(C)C=C1<br> c:12,16,25,27,34,t:2,4,8,10,14,23 | Z8873685389 | 1{73}  | Nc1ccc2ncc<br>n2n1                 | 2{838} | CC(C)(C)c1n<br>cc(C=O)cn1          | 3{13} | COc1ccc(C[<br>N+]#[C-])cc1 | 0.0 | 0 |
| 1955 | 4{171,123,22} | CC1=NC=C(N=C1)C1=C(NC2COC2)N2C=C<br>C(=CC2=N1)N1C=CN=C1<br> c:3,5,8,17,19,22,26,28,t:1                  | Z8873685373 | 1{171} | Nc1cc(cen1<br>)n2ccnc2             | 2{123} | Cc1cnc(C=O<br>)cn1                 | 3{22} | [C-<br>]#[N+]C1CO<br>C1    | 0.0 | 0 |
| 1956 | 4{81,40,9}    | CNC1=C(N=C2C=NC=CN12)C1=NC(CO)=C<br>S1  c:6,8,17,t:2,4,13                                               | Z8873685259 | 1{81}  | Nc1cncn1                           | 2{40}  | OCc1csc(C=<br>O)n1                 | 3{9}  | C[N+]#[C-]                 | 0.0 | 0 |
| 1957 | 4{49,757,13}  | CCCN1N=CN=C1C1=C(NCC2=CC=C(OC)C=<br>C2)N2C(C=CC=C2CO)=N1<br> c:4,6,9,19,24,26,30,t:13,15                | Z8873684630 | 1{49}  | Nc1cccc(C<br>O)n1                  | 2{757} | CCCN1cnc1<br>C=O                   | 3{13} | COc1ccc(C[<br>N+]#[C-])cc1 | 0.0 | 0 |
| 1958 | 4{81,240,9}   | CCN1N=C(Br)C=C1C1=C(NC)N2C=CN=CC2<br>=N1  c:6,9,14,16,19,t:3                                            | Z8854581135 | 1{81}  | Nc1cncn1                           | 2{240} | CCN1nc(Br)c<br>c1C=O               | 3{9}  | C[N+]#[C-]                 | 0.0 | 0 |
| 1959 | 4{481,654,69} | COC(=O)C1=C(Br)N2C(NC3=C(OC)C=CC=C<br>3)=C(CCC3=CN=CO3)N=C2C=C1<br> c:4,10,14,16,24,28,31,t:18,22       | Z8855619774 | 1{481} | COC(=O)c1<br>ccc(N)nc1B<br>r       | 2{654} | O=CCCc1cn<br>co1                   | 3{69} | COc1cccc1[<br>N+]#[C-]     | 0.0 | 0 |
| 1960 | 4{172,550,29} | CCOC(=O)CCNC1=C(N=C2N1C=CC1=C2CC<br>O1)C1=NC(Br)=NN1C  c:10,14,16,26,t:8,23                             | Z8878918905 | 1{172} | Nc1nccc2O<br>CCc21                 | 2{550} | Cn1nc(Br)nc<br>1C=O                | 3{29} | CCOC(=O)C<br>C[N+]#[C-]    | 0.0 | 0 |
| 1961 | 4{482,131,22} | COC(=O)C1=C(C)C=CC2=NC(C3=NC(=NN3)<br>C3CC3)=C(NC3COC3)N12  c:4,7,14,t:9,12,21                          | Z8878918858 | 1{482} | COC(=O)c1<br>nc(N)ccc1C            | 2{131} | O=Cc1nc(n[n<br>H]1)C2CC2           | 3{22} | [C-<br>]#[N+]C1CO<br>C1    | 0.0 | 0 |
| 1962 | 4{375,516,46} | CC(C)OC1=CN=CC2=NC(C3=NN(C)C(=N3)<br>C3CC3)=C(NCC(C)=C)N12  c:6,15,t:4,8,11,21                          | Z8878918857 | 1{375} | CC(C)Oc1c<br>ncc(N)n1              | 2{516} | Cn1nc(C=O)<br>nc1C2CC2             | 3{46} | CC(=C)C[N+]<br>#[C-]       | 0.0 | 0 |
| 1963 | 4{288,350,28} | CCCN1C1=C(N=C2C=C(NC(=O)OC(C)(C)C)<br>=CN12)C1C2CCOCC12  c:18,t:4,6,8                                   | Z8878918619 | 1{288} | CC(C)(C)O<br>C(=O)Nc1c<br>cnc(N)c1 | 2{350} | O=CC1C2C<br>COCC12                 | 3{28} | CCC[N+]#[C-<br>]           | 0.0 | 0 |
| 1964 | 4{187,342,12} | C1C1=CN2C(NCC3CCOC3)=C(N=C2C=C1C#<br>N)C1=CN=C(S1)C1=NC=CC=C1<br> c:12,14,17,24,30,32,t:1,22,28         | Z8878918585 | 1{187} | Nc1cc(C#N<br>)c(Cl)cn1             | 2{342} | O=Cc1cnc(s1<br>)c2cccn2            | 3{12} | [C-<br>]#[N+]CC1C<br>COC1  | 0.0 | 0 |
| 1965 | 4{353,306,15} | CCNC1=C(N=C2C=CC(NS(C)(=O)=O)=CN12<br>)C1=CC=C(C=C1)N(C)CCO<br> c:7,14,21,23,t:3,5,19                   | Z8878918483 | 1{353} | Cl.CS(=O)(<br>=O)Nc1ccc(<br>N)nc1  | 2{306} | CN(CCO)c1c<br>cc(C=O)cc1           | 3{15} | CC[N+]#[C-]                | 0.0 | 0 |

|      |               |                                                                                                          |             |        |                                    |        |                                                 |       |                                       |     |   |
|------|---------------|----------------------------------------------------------------------------------------------------------|-------------|--------|------------------------------------|--------|-------------------------------------------------|-------|---------------------------------------|-----|---|
| 1966 | 4{261,148,28} | CCCNC1=C(N=C2C=CC(=CN12)N1CCC(CC1)N(C)C)C1=C(OC)N(C)N=C1C<br> c:8,10,25,31,t:4,6                         | Z8878918402 | 1{261} | CN(C)C1C<br>CN(CC1)c2<br>ccc(N)nc2 | 2{148} | COc1c(C=O)<br>c(C)nn1C                          | 3{28} | CCC[N+]#[C-]<br>]                     | 0.0 | 0 |
| 1967 | 4{79,197,13}  | COC(=O)C1=CC(=NN1C)C1=C(NCC2=CC=C(OC)C=C2)N2C(C=NC=C2C)=N1<br> c:6,11,21,26,28,31,t:4,15,17              | Z8878918378 | 1{79}  | Cc1cncc(N)<br>n1                   | 2{197} | COC(=O)c1c<br>c(C=O)nn1C                        | 3{13} | COc1ccc(C[<br>N+]#[C-])cc1            | 0.0 | 0 |
| 1968 | 4{78,839,28}  | CCCNC1=C(N=C2C=C(C)C3=NC(C)=CN3N12)C1=CN(C=N1)C1=CC=CC=C1<br> c:14,24,29,31,t:4,6,8,11,21,27             | Z8873684735 | 1{78}  | Cc1cn2nc(N)<br>cc(C)c2n1           | 2{839} | O=Cc1cn(cn<br>1)c2ccccc2                        | 3{28} | CCC[N+]#[C-]<br>]                     | 0.0 | 0 |
| 1969 | 4{73,161,13}  | CCN1C=NC=C1C1=C(NCC2=CC=C(OC)C=C2)N2N3C=CN=C3C=CC2=N1<br> c:3,5,8,18,23,25,28,31,t:12,14                 | Z8873684734 | 1{73}  | Nc1ccc2ncc<br>n2n1                 | 2{161} | CCn1cncc1C<br>=O                                | 3{13} | COc1ccc(C[<br>N+]#[C-])cc1            | 0.0 | 0 |
| 1970 | 4{397,424,5}  | COCCNC1=C(N=C2N1C=CC(C)=C2C)C1=NN(C)C(=N1)C(F)(F)F  c:8,12,15,23,t:6,19                                  | Z8873684721 | 1{397} | Cl.Cc1cncc(<br>N)c1C               | 2{424} | Cn1nc(C=O)<br>nc1C(F)(F)F                       | 3{5}  | COCCC[N+]#<br>#[C-]                   | 0.0 | 0 |
| 1971 | 4{91,840,7}   | NC(=O)C1=CN2C(C=C1)=NC(C1=CN(N=C1)C1=CC=C(C=C1)[N+])([O-])=O=C2NC1CCOCC1<br> c:7,9,15,20,22,27,t:3,12,18 | Z8873685479 | 1{91}  | NC(=O)c1c<br>cc(N)nc1              | 2{840} | [O-]<br>][N+](=O)c1<br>ccc(cc1)n2cc<br>(C=O)cn2 | 3{7}  | [C-]<br>]#[N+]C1CC<br>OCC1            | 0.0 | 0 |
| 1972 | 4{22,262,9}   | CCC1=NN(C)C(=C1C1)C1=C(NC)N2N=C(Cl)C=CC2=N1  c:6,10,18,21,t:2,15                                         | Z8873685395 | 1{22}  | Nc1ccc(Cl)<br>nn1                  | 2{262} | CCc1nn(C)c(<br>C=O)c1Cl                         | 3{9}  | C[N+]#[C-]                            | 0.0 | 0 |
| 1973 | 4{184,792,14} | COCCNC1=C(N=C2C=CC(=CN12)C(N)=S)C1=NN(C)N=C1  c:9,11,23,t:5,7,19                                         | Z8873685314 | 1{184} | NC(=S)c1cc<br>c(N)nc1              | 2{792} | Cn1ncc(C=O)<br>n1                               | 3{14} | COCC[N+]#[<br>C-]                     | 0.0 | 0 |
| 1974 | 4{62,184,6}   | CCOC(=O)CCCNC1=C(N=C2C=C(CO)C=CN12)C1CC1  c:17,t:9,11,13                                                 | Z8873685245 | 1{62}  | Nc1cc(CO)c<br>cn1                  | 2{184} | O=CC1CC1                                        | 3{6}  | CCOC(=O)C<br>CC[N+]#[C-]              | 0.0 | 0 |
| 1975 | 4{436,572,23} | CCC1=CC2=NC(=C(NC(CCC(=O)OC)C(=O)OC)N2C=C1)C1=NC(=CC(OC)=C1)C(=O)OC<br> c:22,27,31,t:2,4,6,25            | Z8873684935 | 1{436} | CCc1cncc(<br>N)c1                  | 2{572} | COC(=O)c1c<br>c(OC)cc(C=<br>O)n1                | 3{23} | COC(=O)CC<br>C([N+]#[C-]<br>])C(=O)OC | 0.0 | 0 |
| 1976 | 4{103,841,5}  | COCCNC1=C(N=C2C=NC=C(CO)N12)C1=C(Br)C(=NN1C)C(F)(F)F  c:10,19,22,t:6,8,12                                | Z8873684832 | 1{103} | Nc1cncc(C<br>O)n1                  | 2{841} | Cn1nc(c(Br)c<br>1C=O)C(F)(F)<br>F               | 3{5}  | COCCC[N+]#<br>#[C-]                   | 0.0 | 0 |
| 1977 | 4{375,531,10} | CC(C)OC1=CN=CC2=NC(=C(NC3CCOC3)N12)C1=CN=C(C)N=C1  c:6,27,t:4,8,10,22,24                                 | Z8873684827 | 1{375} | CC(C)Oc1c<br>ncc(N)n1              | 2{531} | Cc1ncc(C=O)<br>cn1                              | 3{10} | [C-]<br>]#[N+]C1CC<br>OC1             | 0.0 | 0 |
| 1978 | 4{187,682,12} | FC1=C(Cl)C(=CC=N1)C1=C(NCC2CCOC2)N2C=C(Cl)C(=CC2=N1)C#N<br> c:1,4,6,9,23,26,t:20                         | Z8849597819 | 1{187} | Nc1cc(C#N)<br>c(Cl)cn1             | 2{682} | Fc1nccc(C=<br>O)c1Cl                            | 3{12} | [C-]<br>]#[N+]CC1C<br>COC1            | 0.0 | 0 |

|      |               |                                                                                                   |             |        |                               |        |                                     |       |                                  |     |   |
|------|---------------|---------------------------------------------------------------------------------------------------|-------------|--------|-------------------------------|--------|-------------------------------------|-------|----------------------------------|-----|---|
| 1979 | 4{46,842,9}   | CNC1=C(N=C2C=CC=CN12)C1=C(Br)C=C(O)C(=O)OC  c:6,8,13,16,t:2,4                                     | Z8846491863 | 1{46}  | Ne1ccccn1                     | 2{842} | COC(=O)c1c<br>c(Br)c(C=O)<br>o1     | 3{9}  | C[N+]#[C-]                       | 0.0 | 0 |
| 1980 | 4{50,843,18}  | CC(C)(C)NC1=C(N=C2C=CC=C(N12)P(C)(C)=O)C1=C(Br)C(F)=CC(F)=C1  c:9,11,20,24,27,t:5,7               | Z8878918768 | 1{50}  | CP(=O)(C)c<br>1cccc(N)n1      | 2{843} | Fc1cc(F)c(Br)<br>c(C=O)c1           | 3{18} | CC(C)(C)[N<br>+]#[C-]            | 0.0 | 0 |
| 1981 | 4{81,844,9}   | CNC1=C(N=C2C=NC=CN12)C1=NN2C=CC=CC2=C1  c:6,8,16,18,21,t:2,4,13                                   | Z8878918767 | 1{81}  | Ne1cncen1                     | 2{844} | O=Cc1cc2cc<br>ccn2n1                | 3{9}  | C[N+]#[C-]                       | 0.0 | 0 |
| 1982 | 4{172,775,29} | CCOC(=O)CCNC1=C(N=C2N1C=CC1=C2CCO1)C1=C(C)N=C(S1)C(=O)OC  c:10,14,16,23,26,t:8                    | Z8878918761 | 1{172} | Ne1nccc2O<br>CCc21            | 2{775} | COC(=O)c1n<br>c(C)c(C=O)s<br>1      | 3{29} | CCOC(=O)C<br>C[N+]#[C-]          | 0.0 | 0 |
| 1983 | 4{70,845,31}  | CSCCNC1=C(N=C2N1C=CN=C2C1CC1)C1=CC=CN2C=CN=C12  c:7,11,13,22,25,t:5,20,27                         | Z8878918676 | 1{70}  | Ne1ncnc1<br>C2CC2             | 2{845} | O=Cc1cccn2<br>ccnc12                | 3{31} | CSCC[N+]#[<br>C-]                | 0.0 | 0 |
| 1984 | 4{94,846,60}  | COC(=O)C1=CC(NC2=C(N=C3C=CC(F)=NN23)C2=C(C)N=NS2)=CC=C1  c:12,15,20,23,26,28,t:4,8,10             | Z8878918568 | 1{94}  | Ne1ccc(F)n<br>n1              | 2{846} | Cc1nnsc1C=<br>O                     | 3{60} | COC(=O)c1c<br>ccc[N+]#[C-<br>]c1 | 0.0 | 0 |
| 1985 | 4{161,137,11} | CC1=C(C(C)=NO1)C1=C(NCC2=CC(Br)=CC=C2)N2N=CC=CC2=N1  c:4,8,15,17,21,23,26,t:1,12                  | Z8878918542 | 1{161} | Ne1ccenn1                     | 2{137} | Cc1noc(C)c1<br>C=O                  | 3{11} | Br1cccc(C[<br>N+]#[C-])c1        | 0.0 | 0 |
| 1986 | 4{150,735,32} | COC(=O)C1=CN=C(S1)C1=C(NC2CCC2)N2C=CC(=CC2=N1)C1CCOC1  c:6,10,19,21,24,t:4                        | Z8878918432 | 1{150} | Ne1cc(cen1<br>)C2CCOC2        | 2{735} | COC(=O)c1c<br>nc(C=O)s1             | 3{32} | [C-<br>]#[N+]C1CC<br>C1          | 0.0 | 0 |
| 1987 | 4{73,195,20}  | COC1=CC(C)=C(NC2=C(N=C3C=CC4=NC=CN4N23)C2=CC(F)=C(OC)N=C2)C=C1  c:12,16,30,33,t:2,5,8,10,14,23,26 | Z8873684780 | 1{73}  | Ne1ccc2ncc<br>n2n1            | 2{195} | COc1ncc(C=<br>O)cc1F                | 3{20} | COc1ccc([N<br>+]#[C-<br>])c(C)c1 | 0.0 | 0 |
| 1988 | 4{28,847,7}   | CC1CC(CN1C(=O)OC(C)(C)C)C1=C(NC2CCOCC2)N2C=CC(=CC2=N1)C1=NOC=N1  c:14,25,27,30,36,t:33            | Z8873684679 | 1{28}  | Cl.Ne1cc(cc<br>n1)c2ncon2     | 2{847} | CC1CC(CN1<br>C(=O)OC(C)<br>(C)C)C=O | 3{7}  | [C-<br>]#[N+]C1CC<br>OCC1        | 0.0 | 0 |
| 1989 | 4{267,354,59} | CP(C)(=O)C1=C(C=CC=C1)C1=C(NCCC2=C(C(F)=CC=C2)N2C(C=CC=C2#C)=N1  c:6,8,11,19,21,26,28,32,t:4,16   | Z8873684664 | 1{267} | Ne1cccc(C#<br>C)n1            | 2{354} | CP(=O)(C)c1<br>cccc1C=O             | 3{59} | Fc1cccc(CC[<br>N+]#[C-])c1       | 0.0 | 0 |
| 1990 | 4{99,767,66}  | CCCC(OC)C1=C(NC(C)C2=CC=CC=C2)N2C=C(C=CC2=N1)S(N)(=O)=O  c:6,13,15,19,21,24,t:11                  | Z8873684891 | 1{99}  | Ne1ccc(en1<br>)S(=O)(=O)<br>N | 2{767} | CCCC(OC)C<br>=O                     | 3{66} | CC([N+]#[C-<br>])c1cccc1         | 0.0 | 0 |

|      |               |                                                                                                                 |             |        |                        |        |                          |       |                               |     |   |
|------|---------------|-----------------------------------------------------------------------------------------------------------------|-------------|--------|------------------------|--------|--------------------------|-------|-------------------------------|-----|---|
| 1991 | 4{164,804,21} | CN(C)CC1=CC2=NC(=C(NCC3CC3)N2C=C1)C1=C(Br)N=CN1C  c:18,21,24,t:4,6,8                                            | Z8873684889 | 1{164} | CN(C)Cc1ccnc(N)c1      | 2{804} | Cn1cnc(Br)c1C=O          | 3{21} | [C-]#[N+]CC1C1                | 0.0 | 0 |
| 1992 | 4{81,95,9}    | CNC1=C(N=C2C=NC=CN12)C1=CC(=NC=C1)N(C)C  c:6,8,15,17,t:2,4,13                                                   | Z8873684629 | 1{81}  | Nc1cncn1               | 2{95}  | CN(C)c1cc(C=O)ccn1       | 3{9}  | C[N+]#[C-]                    | 0.0 | 0 |
| 1993 | 4{78,848,28}  | CCCNC1=C(N=C2C=C(C)C3=NC(C)=CN3N12)C1=CN(N=C1C)C1=CC=C(C)C=C1  c:14,24,33,t:4,6,8,11,21,28,30                   | Z8873684841 | 1{78}  | Cc1cn2nc(N)cc(C)c2n1   | 2{848} | Cc1nn(cc1C=O)c2ccc(C)cc2 | 3{28} | CCC[N+]#[C-]                  | 0.0 | 0 |
| 1994 | 4{340,13,5}   | CCOC1=CC=CN2C(NCCCOC)=C(N=C12)C1=C(C)NN=N1  c:5,14,20,24,t:3,16                                                 | Z8873684808 | 1{340} | CCOC1cccn1N            | 2{13}  | Cc1[nH]mnc1C=O           | 3{5}  | COCCC[N+]#[C-]                | 0.0 | 0 |
| 1995 | 4{483,55,33}  | COC1=C(CNC2=C(N=C3C=CC(=CN23)N2C(C)=CC=C2C)C2=CC(=NC=C2)P(C)(C)=O)C=CC=C1  c:2,10,12,19,21,27,29,36,38,t:6,8,25 | Z8854581164 | 1{483} | Cc1ccc(C)n1c2ccc(N)nc2 | 2{55}  | CP(=O)(C)c1cc(C=O)ccn1   | 3{33} | COc1cccc1C[N+]#[C-]           | 0.0 | 0 |
| 1996 | 4{452,849,51} | CC(C)(C)OC(=O)NCCNC1=C(CN2C(=O)CO3=C2C=CC=C3)N=C2C=CC3=C(C=NC=C3)N12  c:11,19,22,24,29,33,35,t:27,31            | Z8835022887 | 1{452} | Nc1ccc2ccncc2n1        | 2{849} | O=CCN1C(=O)COc2cccc12    | 3{51} | CC(C)(C)OC(=O)NCC[N+]#[C-]    | 0.0 | 0 |
| 1997 | 4{123,779,31} | COC1=C2NC=NC2=CC(=C1)C1=C(NCCSC)N2C=CC(OCCO)=CC2=N1  c:2,5,8,10,13,21,27,30                                     | Z8835022867 | 1{123} | Cl.Nc1cc(OCCO)ccn1     | 2{779} | COc1cc(C=O)cc2nc[nH]c12  | 3{31} | CSCC[N+]#[C-]                 | 0.0 | 0 |
| 1998 | 4{73,284,20}  | COC1=CC(C)=C(NC2=C(N=C3C=CC4=NC=CN4N23)C2=C(C)N=CC=N2)C=C1  c:12,16,23,26,28,31,t:2,5,8,10,14                   | Z8849597812 | 1{73}  | Nc1ccc2nccn2n1         | 2{284} | Cc1ncnc1C=O              | 3{20} | COc1ccc([N+]#[C-])c(C)c1      | 0.0 | 0 |
| 1999 | 4{397,740,23} | COC(=O)CCC(NC1=C(N=C2N1C=CC(C)=C2)C)C1=CN(N=C1)C(F)F)C(=O)OC  c:10,14,17,24,t:8,21                              | Z8855739214 | 1{397} | Cl.Cc1ccnc(N)c1C       | 2{740} | FC(F)n1cc(C=O)cn1        | 3{23} | COC(=O)CC(C([N+]#[C-])C(=O)OC | 0.0 | 0 |
| 2000 | 4{65,850,23}  | CCC1=CN=CC2=NC(C3=NN(C=C3)C(F)F)=C(NC(CCC(=O)OC)C(=O)OC)N12  c:4,12,t:2,6,9,17                                  | Z8846491975 | 1{65}  | CCc1cnc(N)n1           | 2{850} | FC(F)n1ccc(C=O)n1        | 3{23} | COC(=O)CC(C([N+]#[C-])C(=O)OC | 0.0 | 0 |
| 2001 | 4{433,191,31} | CCN1C=NN=C1C1=C(NCCSC)N2C(C=CC(C#C)=C2C)=N1  c:3,5,8,17,21,24                                                   | Z8878918624 | 1{433} | Cc1nc(N)cc1C#C         | 2{191} | CCn1cnc1C=O              | 3{31} | CSCC[N+]#[C-]                 | 0.0 | 0 |
| 2002 | 4{46,46,9}    | CNC1=C(CCCCCOC)N=C2C=CC=CN12  c:2,13,15,t:11                                                                    | Z8878918468 | 1{46}  | Nc1cccn1               | 2{46}  | COCCCCC=O                | 3{9}  | C[N+]#[C-]                    | 0.0 | 0 |
| 2003 | 4{393,177,23} | COC(=O)CCC(NC1=C(CC2CC(C2)C(=O)OC)N=C2C=CC(Cl)=C(Cl)N12)C(=O)OC  c:8,22,t:20,25                                 | Z8873684763 | 1{393} | Nc1ccc(Cl)c(Cl)n1      | 2{177} | COC(=O)C1CC(CC=O)C1      | 3{23} | COC(=O)CC(C([N+]#[C-])C(=O)OC | 0.0 | 0 |

|      |               |                                                                                                              |             |        |                               |        |                                 |       |                                                 |     |   |
|------|---------------|--------------------------------------------------------------------------------------------------------------|-------------|--------|-------------------------------|--------|---------------------------------|-------|-------------------------------------------------|-----|---|
| 2004 | 4{80,258,67}  | CCC(C)NC1=C(N=C2N1C=CN=C2OC)C1=N<br>N=C(S1)C1CC1  c:7,11,13,20,t:5,18                                        | Z8873685494 | 1{80}  | COc1ncnc<br>1N                | 2{258} | O=Cc1nnc(s<br>1)C2CC2           | 3{67} | CCC(C)[N+]<br>#[C-]                             | 0.0 | 0 |
| 2005 | 4{22,197,13}  | COC(=O)C1=CC(=NN1C)C1=C(NCC2=CC=C<br>(OC)C=C2)N2N=C(Cl)C=CC2=N1<br> c:6,11,21,28,31,t:4,15,17,25             | Z8873685384 | 1{22}  | Nc1ccc(Cl)<br>nn1             | 2{197} | COC(=O)c1c<br>c(C=O)nn1C        | 3{13} | COc1ccc(C[<br>N+]#[C-])cc1                      | 0.0 | 0 |
| 2006 | 4{156,119,22} | CCOC(=O)C1=NN=C(N1)C1=C(NC2COC2)N<br>2C(=N1)C(Cl)=CC=C2Cl  c:7,11,20,24,26,t:5                               | Z8873685327 | 1{156} | Nc1nc(Cl)c<br>cc1Cl           | 2{119} | CCOC(=O)c<br>1nnc(C=O)[n<br>H]1 | 3{22} | [C-<br>]#[N+]C1CO<br>C1                         | 0.0 | 0 |
| 2007 | 4{79,121,13}  | CCC1=CON=C1C1=C(NCC2=CC=C(OC)C=C<br>2)N2C(C=NC=C2C)=N1<br> c:5,8,18,23,25,28,t:2,12,14                       | Z8873684603 | 1{79}  | Cc1nccc(N)<br>n1              | 2{121} | CCc1conc1C<br>=O                | 3{13} | COc1ccc(C[<br>N+]#[C-])cc1                      | 0.0 | 0 |
| 2008 | 4{28,851,7}   | COC1=C(SC)C=C(C=C1)C1=C(NC2CCOCC2<br>)N2C=CC(=CC2=N1)C1=NOC=N1<br> c:2,6,8,11,22,24,27,33,t:30               | Z8855739220 | 1{28}  | Cl.Nc1cc(cc<br>n1)c2ncon2     | 2{851} | COc1ccc(C=<br>O)cc1SC           | 3{7}  | [C-<br>]#[N+]C1CC<br>OCC1                       | 0.0 | 0 |
| 2009 | 4{94,762,21}  | FC1=NN2C(C=C1)=NC(C1CC1(F)F)=C2NCC<br>1CC1  c:5,7,15,t:1                                                     | Z8855739147 | 1{94}  | Nc1ccc(F)n<br>n1              | 2{762} | FC1(F)CC1C<br>=O                | 3{21} | [C-<br>]#[N+]CC1C<br>C1                         | 0.0 | 0 |
| 2010 | 4{484,569,78} | CC(C)(C)OC(=O)NCC1=CC=C(NC2=C(CC3C<br>COC3=O)N=C3C=CC4=C(N=CC=C4)N23)C=<br>C1  c:14,26,30,32,38,t:9,11,24,28 | Z8878918838 | 1{484} | Br.Nc1ccc2<br>ccnc2n1         | 2{569} | O=CCC1CC<br>OC1=O               | 3{78} | CC(C)(C)OC<br>(=O)NCc1cc<br>c([N+]#[C-<br>])cc1 | 0.0 | 0 |
| 2011 | 4{398,689,15} | CCNC1=C(N=C2C=C(C=CN12)C(C)(F)F)C1=<br>CN(CCOC(C)=O)N=C1  c:7,9,27,t:3,5,18                                  | Z8878918781 | 1{398} | Cl.CC(F)(F)<br>c1cnc(N)c<br>1 | 2{689} | CC(=O)OCC<br>n1cc(C=O)en<br>1   | 3{15} | CC[N+]#[C-]                                     | 0.0 | 0 |
| 2012 | 4{103,455,40} | CCOC(=O)C1=CC=C(NC2=C(N=C3C=NC=C(<br>CO)N23)C2=C(C)ON=C2Br)C=C1<br> c:14,23,27,31,t:5,7,10,12,16             | Z8878918650 | 1{103} | Nc1cnc(C<br>O)n1              | 2{455} | Cc1onc(Br)c<br>1C=O             | 3{40} | CCOC(=O)c<br>1ccc([N+]#[<br>C-])cc1             | 0.0 | 0 |
| 2013 | 4{188,352,38} | COCCCC1=C(NC2=CC3=C(OCO3)C=C2)N2<br>C(C=NC=C2C(=O)OC)=N1<br> c:5,16,21,23,29,t:8,10                          | Z8878918549 | 1{188} | COC(=O)c1<br>cnc(N)n1         | 2{352} | COCCCC=O                        | 3{38} | [C-<br>]#[N+]c1ccc<br>2OCOc2c1                  | 0.0 | 0 |
| 2014 | 4{234,427,10} | C1CC(C1)OC1=NC=CN2C(NC3CCOC3)=C(N<br>=C12)C1=NOC2=C1COCC2<br> c:8,18,27,t:6,20,24                            | Z8873684715 | 1{234} | Nc1ncnc1<br>OC2CCCC2          | 2{427} | O=Cc1noc2C<br>COCc12            | 3{10} | [C-<br>]#[N+]C1CC<br>OC1                        | 0.0 | 0 |
| 2015 | 4{436,852,23} | CCC1=CC2=NC(=C(NC(CCC(=O)OC)C(=O)<br>OC)N2C=C1)C1=CC(=CN=C1)C(F)F<br> c:22,27,29,t:2,4,6,25                  | Z8873684687 | 1{436} | CCc1cnc(<br>N)c1              | 2{852} | FC(F)c1cnc<br>(C=O)c1           | 3{23} | COC(=O)CC<br>C([N+]#[C-<br>])C(=O)OC            | 0.0 | 0 |

|      |               |                                                                                                          |             |        |                       |        |                                     |       |                              |     |   |
|------|---------------|----------------------------------------------------------------------------------------------------------|-------------|--------|-----------------------|--------|-------------------------------------|-------|------------------------------|-----|---|
| 2016 | 4{332,454,21} | CCC1=CC=CN2C(NCC3CC3)=C(CC(C)OC)N=C12  c:4,t:2,13,20                                                     | Z8873685478 | 1{332} | CCc1cccn1<br>N        | 2{454} | COC(C)CC=O                          | 3{21} | [C-]<br>#[N+]CC1C<br>C1      | 0.0 | 0 |
| 2017 | 4{448,50,31}  | CSCCNC1=C(N=C2C=C(F)C(C=C)=CN12)[C@@@H]1C[C@H]1C1OCCO1  &1:17,19,r,c:14,t:5,7,9                          | Z8873684887 | 1{448} | Nc1cc(F)c(C=C)cn1     | 2{50}  | O=C[C@@H]1C[C@H]1C2OCCO2  &1:2,4,r  | 3{31} | CSCC[N+]#[C-]                | 0.0 | 0 |
| 2018 | 4{73,838,20}  | COC1=CC(C)=C(NC2=C(N=C3C=CC4=NC=CN4N23)C2=CN=C(N=C2)C(C)(C)C)C=C1  c:12,16,25,27,34,t:2,5,8,10,14,23     | Z8873684626 | 1{73}  | Nc1ccc2nccn2n1        | 2{838} | CC(C)(C)c1ncc(C=O)cn1               | 3{20} | COc1ccc([N+]#[C-])c(C)c1     | 0.0 | 0 |
| 2019 | 4{48,131,15}  | CCNC1=C(N=C2C=C(C=CN12)S(C)(=O)=O)C1=NC(=NN1)C1CC1  c:7,9,20,t:3,5,18                                    | Z8873684591 | 1{48}  | CS(=O)(=O)c1ccnc(N)c1 | 2{131} | O=Cc1nc(n[nH]1)C2CC2                | 3{15} | CC[N+]#[C-]                  | 0.0 | 0 |
| 2020 | 4{78,853,46}  | CC(=C)CNC1=C(N=C2C=C(C)C3=NC(C)=CN3N12)C1=CN=C(N=C1)N1CCCC1  c:15,24,26,t:5,7,9,12,22                    | Z8835022902 | 1{78}  | Cc1cn2nc(N)cc(C)c2n1  | 2{853} | O=Cc1cnc(ncl)N2CCCC2                | 3{46} | CC(=C)C[N+]#[C-]             | 0.0 | 0 |
| 2021 | 4{161,727,6}  | CCOC(=O)CCNC1=C(N=C2C=CC=NN12)C1=CN=C(N=C1)C(C)C  c:13,15,22,24,t:9,11,20                                | Z8835022871 | 1{161} | Nc1ccenn1             | 2{727} | CC(C)c1ncc(C=O)cn1                  | 3{6}  | CCOC(=O)CC[N+]#[C-]          | 0.0 | 0 |
| 2022 | 4{73,162,13}  | COC1=CC=C(CNC2=C(N=C3C=CC4=NC=CN4N23)C2=CC(OC)=NC(C)=C2)C=C1  c:12,16,27,30,33,t:2,4,8,10,14,23          | Z8855739268 | 1{73}  | Nc1ccc2nccn2n1        | 2{162} | COc1cc(C=O)cc(C)n1                  | 3{13} | COc1ccc(C[N+]#[C-])cc1       | 0.0 | 0 |
| 2023 | 4{78,854,28}  | CCCNC1=C(N=C2C=C(C)C3=NC(C)=CN3N12)C1=CN(C)N=C1CN1C(=O)C2=C(C=CC=C2)C1=O  c:14,25,34,36,t:4,6,8,11,21,32 | Z8878918623 | 1{78}  | Cc1cn2nc(N)cc(C)c2n1  | 2{854} | Cn1cc(C=O)c(CN2C(=O)c3ccccc3C2=O)n1 | 3{28} | CCC[N+]#[C-]                 | 0.0 | 0 |
| 2024 | 4{397,585,23} | COC(=O)CCC(NC1=C(CC2CC2(C1)Cl)N=C2N1C=CC(C)=C2)C(=O)OC  c:8,17,21,24                                     | Z8878918590 | 1{397} | Cl.Cc1ccnc(N)c1C      | 2{585} | ClC1(C1)CC1CC=O                     | 3{23} | COC(=O)CC(C[N+]#[C-])C(=O)OC | 0.0 | 0 |
| 2025 | 4{103,855,59} | OCC1=CN=CC2=NC(C3=CC(=NO3)C3CCC3)=C(NCCC3=CC(F)=CC=3)N12  c:4,11,27,29,t:2,6,9,19,24                     | Z8878918366 | 1{103} | Nc1cncc(CO)n1         | 2{855} | O=Cc1cc(no1)C2CCC2                  | 3{59} | Fe1cccc(CC[N+]#[C-])c1       | 0.0 | 0 |
| 2026 | 4{22,69,13}   | COC1=CC=C(CNC2=C(N=C3C=CC(C1)=NN23)C2=NN(C)C(C)=C2)C=C1  c:12,15,25,28,t:2,4,8,10,20                     | Z8878918345 | 1{22}  | Nc1ccc(Cl)nn1         | 2{69}  | Cc1cc(C=O)nn1C                      | 3{13} | COc1ccc(C[N+]#[C-])cc1       | 0.0 | 0 |
| 2027 | 4{85,191,31}  | CCN1C=NN=C1C1=C(NCCSC)N2C(C=C(C=C2)C#N)=N1  c:3,5,8,17,19,24                                             | Z8873684761 | 1{85}  | Cc1cc(C#N)cc(N)n1     | 2{191} | CCn1cnnc1C=O                        | 3{31} | CSCC[N+]#[C-]                | 0.0 | 0 |

|      |               |                                                                                                                  |             |        |                                    |        |                               |       |                                      |     |   |
|------|---------------|------------------------------------------------------------------------------------------------------------------|-------------|--------|------------------------------------|--------|-------------------------------|-------|--------------------------------------|-----|---|
| 2028 | 4{73,91,13}   | COC1=CC=C(CNC2=C(N=C3C=CC4=NC=C<br>N4N23)C2=CC3=C(OCCC3)C=C2)C=C1<br> c:12,16,32,35,t:2,4,8,10,14,23,25          | Z8873684728 | 1{73}  | Nc1ccc2ncc<br>n2n1                 | 2{91}  | O=Cc1ccc2O<br>CCCc2c1         | 3{13} | COc1ccc(C[<br>N+]#[C-])cc1           | 0.0 | 0 |
| 2029 | 4{261,856,12} | CCC1=C(N(C)N=C1)C1=C(NCC2CCOC2)N2<br>C=C(C=CC2=N1)N1CCC(CC1)N(C)C<br> c:6,9,20,22,25,t:2                         | Z8873685402 | 1{261} | CN(C)C1C<br>CN(CC1)c2<br>ccc(N)nc2 | 2{856} | CCc1cnn(C)c<br>1C=O           | 3{12} | [C-<br>]#[N+]CC1C<br>COC1            | 0.0 | 0 |
| 2030 | 4{119,291,21} | COC1=C(C)C(=CN=C1)C1=C(NCC2CC2)N2<br>C=C(C=CC2=N1)C#N  c:2,5,7,10,19,21,24                                       | Z8873684942 | 1{119} | Ne1ccc(C#<br>N)cn1                 | 2{291} | COc1cnc(C<br>=O)c1C           | 3{21} | [C-<br>]#[N+]CC1C<br>C1              | 0.0 | 0 |
| 2031 | 4{333,857,23} | COC(=O)CCC(NC1=C(N=C2C=CC=C(N12)C<br>1=CC=NC=C1)C1=C(F)C(OC)=NC=C1)C(=O)<br>OC  c:12,14,21,23,26,31,33,t:8,10,19 | Z8873684932 | 1{333} | Ne1cccc(n1<br>c2cncnc2             | 2{857} | COc1cnc(C<br>=O)c1F           | 3{23} | COC(=O)CC<br>C([N+]#[C-<br>])C(=O)OC | 0.0 | 0 |
| 2032 | 4{164,242,10} | CN(C)CC1=CC2=NC(=C(NC3CCOC3)N2C=C<br>1)C1=CN2N=CC(C#N)=C2N=C1<br> c:19,25,29,32,t:4,6,8,22                       | Z8873684815 | 1{164} | CN(C)Cc1c<br>cnc(N)c1              | 2{242} | O=Cc1cnc2c<br>(C#N)enn2c1     | 3{10} | [C-<br>]#[N+]C1CC<br>OC1             | 0.0 | 0 |
| 2033 | 4{100,408,37} | COC(=O)C1CC(C1)NC1=C(CCN2CCOC2=O)<br>N=C2C=NC3=C(C=CC=C3)N12<br> c:10,23,27,29,t:21,25                           | Z8846491960 | 1{100} | Ne1cnc2ccc<br>cc2n1                | 2{408} | O=CCCN1C<br>COC1=O            | 3{37} | COC(=O)C1<br>CC(C1)[N+]<br>#[C-]     | 0.0 | 0 |
| 2034 | 4{160,247,14} | CCOC1CC(C1)C1=C(NCCOC)N2C=C(Br)C=<br>C(C#C)C2=N1  c:8,24,t:16,19                                                 | Z8878918815 | 1{160} | Ne1ncc(Br)<br>cc1C#C               | 2{247} | CCOC1CC(C<br>1)C=O            | 3{14} | COCC[N+]#[<br>C-]                    | 0.0 | 0 |
| 2035 | 4{167,294,5}  | COCCNC1=C(N=C2N1C(C)=CN=C2C)C1=<br>C(OC)C(=O)C=CO1  c:8,13,15,19,25,t:6                                          | Z8878918763 | 1{167} | Cc1cnc(C)c<br>(N)n1                | 2{294} | COc1c(C=O)<br>occc1=O         | 3{5}  | COCCC[N+]<br>#[C-]                   | 0.0 | 0 |
| 2036 | 4{452,858,44} | COC1=CC(=O)OC(=C1)C1=C(NCCCCNC(=O)<br>)OC(C)(C)N2C(C=CC3=C2C=NC=C3)=N1<br> c:7,10,27,29,32,34,36,t:2             | Z8878918580 | 1{452} | Ne1ccc2ccn<br>cc2n1                | 2{858} | COc1cc(C=O)<br>)oc(=O)c1      | 3{44} | CC(C)(C)OC<br>(=O)NCCCC<br>[N+]#[C-] | 0.0 | 0 |
| 2037 | 4{81,826,13}  | COC1=CC=C(CNC2=C(N=C3C=NC=CN23)C<br>2=NC(CI)=CS2)C=C1<br> c:12,14,22,26,t:2,4,8,10,19                            | Z8878918556 | 1{81}  | Ne1cncn1                           | 2{826} | C1c1csc(C=O<br>)n1            | 3{13} | COc1ccc(C[<br>N+]#[C-])cc1           | 0.0 | 0 |
| 2038 | 4{46,859,9}   | CNC1=C(N=C2C=CC=CN12)C1=CN2C=CC=<br>C(F)C2=N1  c:6,8,16,22,t:2,4,13,18                                           | Z8878918480 | 1{46}  | Ne1ccccn1                          | 2{859} | Fc1ccn2cc(<br>C=O)nc12        | 3{9}  | C[N+]#[C-]                           | 0.0 | 0 |
| 2039 | 4{267,860,5}  | CCOC(=O)C1=NC(=NN1C)C1=C(NCCCCOC)<br>N2C(C=CC=C2C#C)=N1  c:7,12,22,24,28,t:5                                     | Z8878918426 | 1{267} | Ne1cccc(C#<br>C)n1                 | 2{860} | CCOC(=O)c<br>1nc(C=O)nn<br>1C | 3{5}  | COCCC[N+]<br>#[C-]                   | 0.0 | 0 |

|      |               |                                                                                           |             |        |                                  |        |                           |       |                                   |     |   |
|------|---------------|-------------------------------------------------------------------------------------------|-------------|--------|----------------------------------|--------|---------------------------|-------|-----------------------------------|-----|---|
| 2040 | 4{103,861,5}  | COCNC1=C(N=C2C=NC=C(CO)N12)C1=C(OC)C(CI)=CC=C1Cl  c:10,19,24,26,t:6,8,12                  | Z8873684770 | 1{103} | Nc1cncc(CO)n1                    | 2{861} | COc1c(Cl)cc(Cl)c1C=O      | 3{5}  | COCCC[N+]#[C-]                    | 0.0 | 0 |
| 2041 | 4{352,862,47} | CC(C)NC1=C(N=C2C=CC(=CN12)N1CCN(C)C(=O)C1)C1=CSC(=N1)N(C)C(C)=O  c:8,10,27,t:4,6,24       | Z8873684746 | 1{352} | CN1CCN(C1=O)c2ccc(N)nc2          | 2{862} | CN(C(=O)C)c1nc(C=O)cs1    | 3{47} | CC(C)[N+]#[C-]                    | 0.0 | 0 |
| 2042 | 4{78,863,28}  | CCCNC1=C(N=C2C=C(C)C3=NC(C)=CN3N12)C1=CC2=C(OC(C)(C)C2)C=C1  c:14,31,t:4,6,8,11,21,23     | Z8873684710 | 1{78}  | Cc1cn2nc(N)cc(C)c2n1             | 2{863} | CC1(C)Ce2cc(C=O)ccc2O1    | 3{28} | CCC[N+]#[C-]                      | 0.0 | 0 |
| 2043 | 4{125,864,18} | COC(=O)C1=CN2C(C=C1)=NC=C2C1=C(NC(C)(C)C)N2C=C(CCO)C=CC2=N1  c:8,10,12,15,28,31,t:4,23    | Z8873684647 | 1{125} | Nc1ccc(CC)cn1                    | 2{864} | COC(=O)c1ccc2ncc(C=O)n2c1 | 3{18} | CC(C)(C)[N+]#[C-]                 | 0.0 | 0 |
| 2044 | 4{327,865,34} | COC(=O)C1=C(F)C2=NC(=C(NCC3CCCO3)N2C=C1)C1=NN2CCCCC2=C1  c:4,21,32,t:7,9,24               | Z8873685355 | 1{327} | COC(=O)c1ccnc(N)c1F              | 2{865} | O=Cc1cc2C CCCn2n1         | 3{34} | [C-]#[N+]CC1C CCO1                | 0.0 | 0 |
| 2045 | 4{485,564,29} | CCOC(=O)CCNC1=C(N=C2N1C=CC1=C2CN(CC1)C(=O)OC(C)(C)C1=CN=NN1C  c:10,14,16,33,t:8,31        | Z8873684924 | 1{485} | CC(C)(C)OC(=O)N1C Cc2ccnc(N)c2C1 | 2{564} | Cn1nccc1C=O               | 3{29} | CCOC(=O)C C[N+]#[C-]              | 0.0 | 0 |
| 2046 | 4{161,363,11} | CC1=NC(=CN1)C1=C(NCC2=CC(Br)=CC=C2)N2N=CC=CC2=N1  c:3,7,14,16,20,22,25,t:1,11             | Z8873684806 | 1{161} | Nc1cccnn1                        | 2{363} | Cc1nc(C=O)c[nH]1          | 3{11} | Br1cccc(C[N+]#[C-])c1             | 0.0 | 0 |
| 2047 | 4{364,866,38} | FC(F)(F)COCCC1=C(NC2=CC3=C(OCO3)C=C2)N2C=C(C=CC2=N1)N1CCNC(=O)C1  c:8,19,23,25,28,t:11,13 | Z8854581162 | 1{364} | Nc1ccc(en1)N2CCNC(=O)C2          | 2{866} | FC(F)(F)CO CCC=O          | 3{38} | [C-]#[N+]c1ccc2OCoc2c1            | 0.0 | 0 |
| 2048 | 4{78,867,46}  | COC(=O)C1=NC=CC(=C1)C1=C(NCC(C)=C)N2N3C=C(C)N=C3C(C)=CC2=N1  c:6,8,11,23,27,30,t:4,20     | Z8835022905 | 1{78}  | Cc1cn2nc(N)cc(C)c2n1             | 2{867} | COC(=O)c1cc(C=O)ccn1      | 3{46} | CC(=C)C[N+]#[C-]                  | 0.0 | 0 |
| 2049 | 4{143,862,43} | CCC1=NN2C(C=C1)=NC(=C2NC1CCN(CC1)C(=O)OC(C)(C)C1=CSC(=N1)N(C)C(C)=O  c:6,8,10,31,t:2,28   | Z8849597840 | 1{143} | CCc1ccc(N)nn1                    | 2{862} | CN(C(=O)C)c1nc(C=O)cs1    | 3{43} | CC(C)(C)OC(=O)N1CCC(CC1)[N+]#[C-] | 0.0 | 0 |
| 2050 | 4{121,272,10} | CC(C)C1=NN=C(S1)C1=C(NC2CCOC2)N2C=CC(Br)=CC2=N1  c:5,9,19,22,25,t:3                       | Z8849597839 | 1{121} | Nc1cc(Br)cn1                     | 2{272} | CC(C)c1nnc(C=O)s1         | 3{10} | [C-]#[N+]C1CCOC1                  | 0.0 | 0 |
| 2051 | 4{73,161,11}  | CCN1C=NC=C1C1=C(NCC2=CC(Br)=CC=C2)N2N3C=CN=C3C=CC2=N1  c:3,5,8,15,17,22,24,27,30,t:12     | Z8849597806 | 1{73}  | Nc1ccc2nccn2n1                   | 2{161} | CCn1cncc1C=O              | 3{11} | Br1cccc(C[N+]#[C-])c1             | 0.0 | 0 |



|      |             |                                                                                         |             |       |                   |        |                          |      |                       |     |   |
|------|-------------|-----------------------------------------------------------------------------------------|-------------|-------|-------------------|--------|--------------------------|------|-----------------------|-----|---|
| 2052 | 4{91,447,7} | CC(C)(O)C#CC1=CC=C(C=C1)C1=C(NC2CCOCC2)N2C=C(C=CC2=N1)C(N)=O<br> c:8,10,13,24,26,29,t:6 | Z8837933136 | 1{91} | NC(=O)c1ccc(N)nc1 | 2{447} | CC(C)(O)C#Cc1ccc(C=O)cc1 | 3{7} | [C-]<br>][N+]C1CCOCC1 | 0.0 | 0 |
|------|-------------|-----------------------------------------------------------------------------------------|-------------|-------|-------------------|--------|--------------------------|------|-----------------------|-----|---|
